# Supplementary material for: Effect of wet storage conditions on potato tuber transcriptome, phytohormones and growth
Source: BMC Plant Biol. 2019 Jun 17;19:262. doi: 10.1186/s12870-019-1875-y (PMC6580497; doi:10.1186/s12870-019-1875-y)
Supplement: Supplementary file 1 — Microarray data. Raw data and DEGs of the microarray data with log2 fold change ≥ − 1 and ≤ + 1 and p-value ≤0.05, and categorized genes. (XLSX 6000 kb) [file 12870_2019_1875_MOESM1_ESM.xlsx]

## Sheet: All data
Gene ID	Probe	BlastX tophit	BINCODE	GO CLASS	Description/blastx	probe sequence	Neg.Wet	Neg.Wet	Neg.Wet	Neg.Dry	Neg.Dry	Neg.Dry	logFC Neg.Wet-Neg.Dry	p Neg.Wet-Neg.Dry	FDR Neg.Wet-Neg.Dry
bf_arrayxxx_0078a10.t7m.scf	bf_arrayxxx_0078a10.t7m.scf_156	ABO83070	33.1	development.storage proteins	NOT VALIDATED ABO83070: Cupin region [Medicago truncatula]	GCTGTACTTGGTCCGAGTTTTTACCCCTGATTCGTCTATTTAATTTGAGTTATATTACGA	7.1	6.9	7.1	10.5	10.4	10.6	-3.5	2.7e-08	0.00061
MICRO.1751.C21	MICRO.1751.C21_77	AAL99260	20.1.07.06	stress.biotic.PR-proteins.proteinase inhibitors	NOT VALIDATED AAL99260: Kunitz-type enzyme inhibitor P4E1 precursor [Solanum tuberosum]	CCATTGACCTACCCACTGATACTACTCCATGTACTCCAGTACATGACACAAATGGTAATG	8.4	9	8	11.3	11.7	11.8	-3.2	1.5e-08	0.00061
MICRO.15956.C1	MICRO.15956.C1_656	NP_195822	35.2	not assigned.unknown	NOT VALIDATED NP_195822: unknown protein [Arabidopsis thaliana]	GAGAAGCAGTTATCTACCTCAATATTAACAGATGGATGATTACTAGTAATTAGCCAAGAG	11.3	9.6	10.3	7.7	7.3	7.1	3	4.2e-08	0.00063
MICRO.8147.C4	MICRO.8147.C4_421	BAB11384	29.2.2	protein.synthesis.misc ribosomal protein	NOT VALIDATED BAB11384: unnamed protein product [Arabidopsis thaliana]	AACAAAACTGCAAAATAAGAAAGAAAGAAGGGAGAAAAATGATGAACACTTCCTCCCCTC	8.5	8.5	8.4	6.9	6.9	6.9	1.5	5.7e-08	0.00064
TBSK02099FG11.t3m.scf	TBSK02099FG11.t3m.scf_310	NA	35.2	not assigned.unknown	NOT VALIDATED NA: NA	TGATGGTCGGACCGTATACGGTACACCCGGTTCAGATCTCATTCCTTTATCTGACATATT	6.8	7.1	7.2	9.2	9.4	9.1	-2.2	9.9e-08	0.00089
MICRO.7769.C2	MICRO.7769.C2_52	ABE98329	35.1.19	not assigned.no ontology.C2 domain-containing protein	NOT VALIDATED ABE98329: SRC2-like protein [Nicotiana benthamiana]	TAAATTCGTTCCCCCATAAACAGAACCCAACAAATAATCGGAGTTAGTTTCAAACAAACT	8.3	8.1	8.4	6.9	6.6	6.8	1.5	1.6e-07	0.0012
MICRO.9253.C1	MICRO.9253.C1_646	AAU21476	1.01.02.02	PS.lightreaction.photosystem I.PSI polypeptide subunits	NOT VALIDATED AAU21476: chloroplast photosystem I reaction center V [Camellia sinensis]	GTGCCAAAGAATTACTAGTACTATCTCTGTTTTGCTTTGCTTTGATCGTTTTATTCTGTG	9.2	9.3	8.8	11.2	10.6	11.2	-1.9	2.7e-07	0.0017
MICRO.4155.C3	MICRO.4155.C3_958	P27525	1.01.01.01	PS.lightreaction.photosystem II.LHC-II	NOT VALIDATED P27525: Chlorophyll a-b binding protein CP24 10B, chloroplast precursor (CAB-10B) (LHCP)	TGCTTTGGCCCAAAGGGACAGTATATAAATTGTAACAATGCAGAGGCAGCAATATGGTAG	7.4	7.3	6.7	9.6	8.9	9.3	-2.1	3.5e-07	0.002
bf_cswbxxxx_0040b04.t3m.scf	bf_cswbxxxx_0040b04.t3m.scf_609	NA	35.2	not assigned.unknown	NOT VALIDATED NA: NA	TATTGGTCATGGCTGTACTCTTGGCTAGCCATCCTTGTTTATATCCTTTTCCAGTGTCAC	7.1	6.8	7	8.1	8.4	8.3	-1.3	4.5e-07	0.0022
MICRO.12481.C1	MICRO.12481.C1_403	NA	35.2	not assigned.unknown	NOT VALIDATED NA: NA	TGATCGCAGCATGCCTACAAATTGCTGTCATTCGATCTAGTGCTTGTGCAAGCAGTAGTT	8.8	8.1	8.5	7.1	7.4	7	1.4	4.8e-07	0.0022
ACDA03942A06.T3m.scf	ACDA03942A06.T3m.scf_276	Q41448	35.2	not assigned.unknown	NOT VALIDATED Q41448: Aspartic protease inhibitor 7 precursor (Cathepsin D inhibitor p749)	ACCTAGCAGAACAGCCGTATAGATTCATTCCTTCATCTGGAGCAAATATCTTTGACGATC	9.1	9.9	8.9	12.4	12.6	12.7	-3.2	1.3e-06	0.0029
bf_arrayxxx_0085g08.t7m.scf	bf_arrayxxx_0085g08.t7m.scf_657	NA	35.2	not assigned.unknown	NOT VALIDATED NA: NA	CTATTAGGCTATACACCAGAATGAATGAAGATACAGACAATTAAGCTTTCCTGTACACAC	8.8	9	8.9	7.7	7.2	6.6	1.8	1.3e-06	0.0029
bf_mxflxxxx_0048b03.t3m.scf	bf_mxflxxxx_0048b03.t3m.scf_280	NA	35.2	not assigned.unknown	NOT VALIDATED NA: NA	TGGAGATTATGATTATGCTCCGACCGCATGAATAAGTTCATTGAAGGCTCTTGGTAGAGA	7.4	7	7.5	9.3	9.5	9.5	-2.2	8.6e-07	0.0029
bf_mxflxxxx_0068b02.t3m.scf	bf_mxflxxxx_0068b02.t3m.scf_660	NA	35.1	not assigned.no ontology	NOT VALIDATED NA: NA	TTGGAATTGGCTCATTGTGTCATGCTCATGGAGCCTTTAGTGGTTCCTGAAGATTAGTAT	8	8.3	7.9	6.7	6.6	6.8	1.3	1.4e-06	0.0029
MICRO.100.C1	MICRO.100.C1_1415	CAD12664	13.1.1.1	amino acid metabolism.synthesis.central amino acid metabolism.GABA	NOT VALIDATED CAD12664: viroid RNA-binding protein [Solanum lycopersicum]	AGAGTGGAAGAACTCAAGTCTCAGAAAAAGTAAAAAGCTCATGACAAAAACTTGATGTTC	9.6	10	8.6	15.1	14.6	14.1	-5.2	1.5e-06	0.0029
MICRO.1102.C1	MICRO.1102.C1_1543	P93566	1.01.01.02	PS.lightreaction.photosystem II.PSII polypeptide subunits	NOT VALIDATED P93566: Oxygen-evolving enhancer protein 2, chloroplast precursor (OEE2) (23 kDa subunit of oxygen evolving system of photosystem II) (OEC 23 kDa subunit) (23 kDa thylakoid membrane protein)	GCTCTTTCCAACCAATCCCAAAAAAGTTTTTAAACATGTTTCAAATACTGTTGGAGGAAG	8.3	8.2	7.5	10.9	10.1	10	-2.3	1.3e-06	0.0029
MICRO.15166.C1	MICRO.15166.C1_923	ABO83683	35.1	not assigned.no ontology	NOT VALIDATED ABO83683: Homeodomain-related [Medicago truncatula]	CATGCTACTTACCTAAAGCTGGTACTCTGCTGCTAAAACGTCTTGCAGGATAAATGGAGG	9	8.4	9.2	6.5	7.2	6.6	2.1	1.2e-06	0.0029
MICRO.165.C20	MICRO.165.C20_58	Q9ZSK5	26.02	misc.UDP glucosyl and glucoronyl transferases	NOT VALIDATED Q9ZSK5: Zeatin O-glucosyltransferase (Trans-zeatin O-beta-D-glucosyltransferase)	AGTGATATTCGTCTCATTTGGATCAACCACTTACATTATCACAAGAGCAGATCAATGAGA	6.8	7	6.7	8.9	9.3	8.3	-2	9.2e-07	0.0029
MICRO.2098.C2	MICRO.2098.C2_825	AAY89389	21.02.1	redox.ascorbate and glutathione.ascorbate	NOT VALIDATED AAY89389: thylakoid-bound ascorbate peroxidase 6 [Lycopersicon esculentum]	CCAGAAACGAGATACACGGATCTACTGAGGGGCTGTGTGATTGGAACCTAATTTCCTATA	7.6	7.8	7.6	6.8	6.7	6.7	1	1e-06	0.0029
MICRO.3211.C1	MICRO.3211.C1_609	ABO83070	33.1	development.storage proteins	NOT VALIDATED ABO83070: Cupin region [Medicago truncatula]	ATCCAACAGCGCGAAACGCAAGGTTGTTTTACAACTTGGATGGTGCAAAACCTTGGTGTT	7.2	7	7.4	9.3	9.3	9.9	-2.3	1.5e-06	0.0029
MICRO.378.C2	MICRO.378.C2_1372	BAB11103	35.2	not assigned.unknown	NOT VALIDATED BAB11103: unnamed protein product [Arabidopsis thaliana]	AAGACCGTCTCAACATCCAGTAAGAGAAAGAAGAAGTCTCATATTGGCGCGCTCTGACTA	8.4	7.9	8.1	7.2	6.7	6.7	1.2	1.5e-06	0.0029
MICRO.5537.C1	MICRO.5537.C1_1458	NP_197367	19.13	tetrapyrrole synthesis.divinyl chlorophyllide-a 8-vinyl-reductase	NOT VALIDATED NP_197367: PCB2 (PALE-GREEN AND CHLOROPHYLL B REDUCED 2) [Arabidopsis thaliana]	TTAACTAGCTACTCTCCGACAAATCAATTTTGATGTATGCAGTTTGTCCGGCTGTAGCAG	7.8	7.4	7.5	9	8.6	9	-1.3	1.6e-06	0.0029
MICRO.6364.C1	MICRO.6364.C1_498	NA	35.2	not assigned.unknown	NOT VALIDATED NA: NA	AGAGATTGACATGCTGAGAGCAAAAATCCAAGAATTAGACACCGAGTGTGTAAAGAAAGG	8.8	8.3	8.2	7.2	6.8	6.8	1.5	7e-07	0.0029
POAE566TP	POAE566TP_836	NP_568082	35.2	not assigned.unknown	NOT VALIDATED NP_568082: unknown protein [Arabidopsis thaliana]	TTGTACCTCTTGTGCTACTCCTCTGCTCTAAGCCTTAACCAGACGTATTCAGTATTTGAA	14.1	12.4	13.8	11.1	10.4	11.2	2.5	9.7e-07	0.0029
STMJF77TV	STMJF77TV_1	NP_680198	35.2	not assigned.unknown	NOT VALIDATED NP_680198: unknown protein [Arabidopsis thaliana]	AAACAAATGCCCTAGAGAAACTGTTGGAGAAATTTAAAGACGATGTAGCAATTCGCTGGG	8.1	8.1	8.2	7.2	7.1	6.9	1.1	1.5e-06	0.0029
MICRO.10356.C1	MICRO.10356.C1_786	AAF81279	17.3.01.02.04	hormone metabolism.brassinosteroid.synthesis-degradation.sterols.FACKEL	NOT VALIDATED AAF81279: C-14 sterol reductase [Arabidopsis thaliana]	TGTGCTTCTTGTATTGAATGCCAACTATGGAATTACTTCGTATGGTTGGTTATTAATGTG	8.2	8.9	8.4	10.6	10.5	10.1	-1.9	1.7e-06	0.003
MICRO.12177.C1	MICRO.12177.C1_526	NA	35.2	not assigned.unknown	NOT VALIDATED NA: NA	AGTTTAGGAGAGATGAGAAGAGAAAGTTCAAGTTATATAGACCTTCAAGCTCGAAAAGGG	7.3	7.5	7.3	8.7	8.7	9.2	-1.5	2.1e-06	0.0034
STMEN20TV	STMEN20TV_662	NA	35.2	not assigned.unknown	NOT VALIDATED NA: NA	CAACTAGGATCTTGTAGCTGATCTTAATACCAATTTTCCAGACGCAAACTTCACATTTAT	7.9	7.9	7.7	6.9	6.9	6.7	1	2.1e-06	0.0034
MICRO.1082.C3	MICRO.1082.C3_623	ABN08775	20.1.07	stress.biotic.PR-proteins	NOT VALIDATED ABN08775: Glycoside hydrolase, family 19 [Medicago truncatula]	TATCTACTGGTTCCTACCTACCTACATCTCCTTTGATAGATCTGCAACTGCTTTCCGTGT	7.7	7.2	7.4	8.5	8.3	8.7	-1.1	2.6e-06	0.0038
MICRO.11953.C1	MICRO.11953.C1_715	EAZ21226	35.1	not assigned.no ontology	NOT VALIDATED EAZ21226: hypothetical protein OsJ_035435 [Oryza sativa (japonica cultivar-group)]	TATCTTAGGGTTCTTGAACAAAGCAATTTGAAACTCAGAACAGAGCAGCAGTTACAAGCT	8.7	8.8	8.4	7.4	6.9	7	1.5	2.6e-06	0.0038
MICRO.4583.C1	MICRO.4583.C1_712	AAO85557	1.01.02.02	PS.lightreaction.photosystem I.PSI polypeptide subunits	NOT VALIDATED AAO85557: photosystem I subunit XI [Nicotiana attenuata]	TATCAAAGTTGTATATCGAACCGCTGATCTCTTGGAGGAGTGTAATGAATGTTTACTTTA	9.7	9.8	8.3	12.2	11.3	11.8	-2.5	2.6e-06	0.0038
MICRO.2858.C2	MICRO.2858.C2_962	AAN37418	17.7.1.4	hormone metabolism.jasmonate.synthesis-degradation.allene oxidase cyclase	NOT VALIDATED AAN37418: allene oxide cyclase [Solanum tuberosum]	TGTTGGTTAACCTATTTTGTAGTACTTTGTATGTATGCCCTATTTTCTGAATTGCATCCC	7.4	6.9	7.7	8.9	9.3	8.7	-1.6	3.1e-06	0.0042
MICRO.4077.C1	MICRO.4077.C1_755	NP_180251	11.3	lipid metabolism.Phospholipid synthesis	NOT VALIDATED NP_180251: EMB1187; kinase/ phosphotransferase, alcohol group as acceptor [Arabidopsis thaliana]	ATGAGGATAAAAGAAAGCTGTATTTCATTGATTTTGAGTATGGATCCTACATTACAGGGG	9	8.8	8.9	8	7.5	7.9	1.1	3.2e-06	0.0042
MICRO.7877.C2	MICRO.7877.C2_855	NA	35.2	not assigned.unknown	NOT VALIDATED NA: NA	AACATGTGCAGAACAAAATGCTGAACCATTTTGTGGTGTTAGACAATGATTTCAATTCTG	8.7	8	9.3	6.8	6.8	7.3	1.7	3e-06	0.0042
TBSK00131FC11.t3m.scf	TBSK00131FC11.t3m.scf_164	AAB23206	35.2	not assigned.unknown	NOT VALIDATED AAB23206: aspartic proteinase inhibitor [potato, Peptide, 220 aa]	CCGTTAGATTCATTCCCTTTATCTGGCAGGTATATTTGAAAGATCAAACTACTCAAACAT	9.5	10.5	9.2	12.7	13	13.2	-3.2	3.4e-06	0.0044
BF_CSCHXXXX_0037F03.T3M.SCF	BF_CSCHXXXX_0037F03.T3M.SCF_222	NA	35.2	not assigned.unknown	NOT VALIDATED NA: NA	AAATTCGAGATGCCCCTGCTCACATATGGCGTTATCACGTTCACAATTCCGATGTTGGAA	7.4	8.3	7.4	10.6	11	10.3	-2.9	3.8e-06	0.0045
bf_cswbxxxx_0027a10.t3m.scf	bf_cswbxxxx_0027a10.t3m.scf_145	NA	35.2	not assigned.unknown	NOT VALIDATED NA: NA	TCTATGTGTCTTGCTGCTGCTTGTTGTTACTGATTCAAAATAATCAAATTGCAGATCTTG	7.4	7.4	6.9	9	8.9	8.8	-1.7	3.9e-06	0.0045
MICRO.10141.C1	MICRO.10141.C1_606	NP_564544	9.6	mitochondrial electron transport / ATP synthesis.cytochrome c	NOT VALIDATED NP_564544: unknown protein [Arabidopsis thaliana]	CCATTGATACAGCTTCTTGACCCATGTAAAGTAGTCCTTTGCTTTTGTTAGGGGTATTTT	8.2	8.1	8	9.3	9.4	9.4	-1.3	4e-06	0.0045
MICRO.9354.C2	MICRO.9354.C2_781	ABE93092	35.2	not assigned.unknown	NOT VALIDATED ABE93092: Protein of unknown function DUF565 [Medicago truncatula]	TAAAACTGTTGCAATCTCCCTTCCATGGGACTGGTTTATTGATCTTACCTGTTTTATACG	9.9	10.7	9.6	11.9	11.6	11.8	-1.7	3.8e-06	0.0045
STMHW56TV	STMHW56TV_623	NA	35.2	not assigned.unknown	NOT VALIDATED NA: NA	AAATGTTGAAGCAGATTGTTTAAAGATGTTTCCACGTGTACCTCTACTGCAATTTCCAAT	8.1	7.7	7.8	6.8	6.7	6.5	1.2	3.7e-06	0.0045
bf_mxlfxxxx_0011d12.t3m.scf	bf_mxlfxxxx_0011d12.t3m.scf_620	NP_180612	21.04	redox.glutaredoxins	NOT VALIDATED NP_180612: electron transporter/ thiol-disulfide exchange intermediate [Arabidopsis thaliana]	AGGAAGTTGTAGGTATGAAAATGTGATGTAAATCTGTCCGTGGAACGATGTGGTGTGCTC	6.4	6.3	6.1	7.2	7.3	7.6	-1.1	4.3e-06	0.0047
156B12AF.esd	156B12AF.esd_134	Q41480	20.1.07.06	stress.biotic.PR-proteins.proteinase inhibitors	NOT VALIDATED Q41480: Aspartic protease inhibitor 1 precursor (pA1) (gCDI-A1) (STPIA) (STPID)	TTTGGGTACCACCTATTGTATTGCCCTATTTACTCGCCATTTTCTTTGGCCATTTTGTCG	10.5	12	10.1	14.8	14.8	14.9	-4	4.6e-06	0.0048
MICRO.8090.C1	MICRO.8090.C1_835	AAR25800	29.5.03	protein.degradation.cysteine protease	NOT VALIDATED AAR25800: cathepsin B-like cysteine proteinase [Solanum tuberosum]	TGTCAATGCATACAGGGTCAGCCATGATCCCCAGAGTATCATGGCGGAAGTTTACAAAAA	12.9	11.6	12.3	10.6	10.6	10.4	1.8	4.5e-06	0.0048
MICRO.17865.C1	MICRO.17865.C1_481	EAY91708	35.2	not assigned.unknown	NOT VALIDATED EAY91708: hypothetical protein OsI_012941 [Oryza sativa (indica cultivar-group)]	TAGTATCTCAATTGTTGTGTAGAACTTGGATTCGTTGATTTCATTGAAGTGTTTCTGCTG	9.7	10.3	10.2	8.3	7.1	8.6	2.1	5e-06	0.0051
bf_arrayxxx_0058c05.t7m.scf	bf_arrayxxx_0058c05.t7m.scf_560	NP_194391	29.4	protein.postranslational modification	NOT VALIDATED NP_194391: kinase [Arabidopsis thaliana]	CTGTAACTGGTCCATACCAGCCAAAGTCTGATACTTATCTCGATTTGATTTCTTTTGAAC	7.6	7.7	7.9	6.7	6.8	6.3	1.1	5.1e-06	0.0052
MICRO.7786.C2	MICRO.7786.C2_767	AAO24593	35.1	not assigned.no ontology	NOT VALIDATED AAO24593: At5g49570 [Arabidopsis thaliana]	TTGATCCTTGTGAAGGAATATATGACAATCCTCTTGGATAAACGAACTTCCCAGATGTTT	8.2	7.8	8.6	6.8	7.2	6.7	1.3	5.7e-06	0.0056
MICRO.13855.C1	MICRO.13855.C1_983	ABA46782	27.4	RNA.RNA binding	NOT VALIDATED ABA46782: unknown [Solanum tuberosum]	TATATTATTGGGCATATGTATGCAAAAAGAAAGTGCAATGACACATTCTCTTTCTCGAGC	7.8	8.3	7.9	6.9	6.7	6.7	1.2	6.3e-06	0.006
BPLI17O17TH	BPLI17O17TH_745	CAB85635	16.8.3	secondary metabolism.flavonoids.dihydroflavonols	NOT VALIDATED CAB85635: putative ripening-related P-450 enzyme [Vitis vinifera]	AGGAGTTTCAAACTTCGATGAATCGGAGCAAAATATCACAGACCCATCAGAACCAGCCCT	7.9	8.4	8.1	7.1	6.8	6.9	1.2	6.6e-06	0.0061
cSTD11I16TH	cSTD11I16TH_1	NP_198034	34.12	transport.metal	NOT VALIDATED NP_198034: unknown protein [Arabidopsis thaliana]	TTTCTCTTAGAAATTTCCACAAATTCATTGACCACACATCTCTCCAATCGAATGACCCAA	9.2	7.6	8.5	6	6	6.6	2.3	6.9e-06	0.0061
MICRO.16222.C1	MICRO.16222.C1_473	EAZ31339	35.2	not assigned.unknown	NOT VALIDATED EAZ31339: hypothetical protein OsJ_014822 [Oryza sativa (japonica cultivar-group)]	TATACCATTAGCCATTAGGTCCCCCTAAAATATAGCTACATGTATGTCTGATATAGAAAG	9.6	10.8	9	13.1	12.9	12.6	-3.1	6.5e-06	0.0061
bf_mxflxxxx_0049h01.t3m.scf	bf_mxflxxxx_0049h01.t3m.scf_111	ABA99697	35.1	not assigned.no ontology	NOT VALIDATED ABA99697: glycosyl transferase, group 1 family protein, expressed [Oryza sativa (japonica cultivar-group)]	AGAGAAGGTGGGCATTTTTATGTAGTCCTTGTGGAAATCAAGGCACACCCACTCCAACTT	7.7	7.2	8	6	6.4	6.7	1.3	8.2e-06	0.0062
MICRO.11523.C1	MICRO.11523.C1_628	NP_180094	29.4.1.60	protein.postranslational modification.kinase.receptor like cytoplasmatic kinase X	NOT VALIDATED NP_180094: ATP binding / kinase/ protein kinase/ protein serine/threonine kinase/ protein-tyrosine kinase [Arabidopsis thaliana]	GTGTATATAGTTGTAAATTTGAGGTAGCAAAAGCTCTGATTTCACTTCAAGTTTTTGGCC	6.8	6.2	6.8	7.8	7.7	7.8	-1.2	7.7e-06	0.0062
MICRO.11614.C2	MICRO.11614.C2_286	BAB01831	35.1	not assigned.no ontology	NOT VALIDATED BAB01831: unnamed protein product [Arabidopsis thaliana]	CAGCTGCCAAATGAAGATCTAGATGCACTTATATCGATAACATGTGATGAAGATTTAGTC	10.4	9.7	11.2	8.6	7	6.4	3.1	8.2e-06	0.0062
MICRO.2431.C1	MICRO.2431.C1_997	ABO84533	35.1	not assigned.no ontology	NOT VALIDATED ABO84533: Protein of unknown function DUF477 [Medicago truncatula]	CGGAAATGACTGATTCATGAGATATTTAAAAAGGATAAATATGAAGATTTGGACCTCCCC	7.5	7.9	7	9.4	8.9	8.9	-1.6	8.2e-06	0.0062
MICRO.2940.C2	MICRO.2940.C2_508	AAG50930	35.2	not assigned.unknown	NOT VALIDATED AAG50930: unknown protein [Arabidopsis thaliana]	AAGCCCAGAAGGCATAAGAGTATCAAGTTTTGTTATTAGCATTAGTGTAAGTTTCACCTT	8.6	8.7	7.7	10.2	10.2	10.4	-1.9	7.6e-06	0.0062
MICRO.3444.C1	MICRO.3444.C1_1632	CAC44040	20.1.08	stress.biotic.secondary metabolites	NOT VALIDATED CAC44040: fatty acid hydroperoxide lyase [Solanum tuberosum]	GCTAGACATGTTGAAATTAAGTCATCAGTGGCTGGCTTTTCTCACCTCCTGTTGTGATTT	9.7	10.8	9.3	11.8	11.9	12.5	-2.2	8.2e-06	0.0062
MICRO.604.C1	MICRO.604.C1_463	ABB87132	35.1	not assigned.no ontology	NOT VALIDATED ABB87132: translocon-associated protein beta family protein-like [Solanum tuberosum]	AAGAAGTTTGACTGGGTAAGCGCTCAAATACTAGTAGCTGCAGCTGCACGAACTACAGAA	8.5	7.8	8.8	6.9	6.7	6.6	1.6	7.8e-06	0.0062
STMIA57TV	STMIA57TV_244	ABO84473	29.5.11.20	protein.degradation.ubiquitin.proteasom	NOT VALIDATED ABO84473: Proteasome component region PCI [Medicago truncatula]	GTAGAGCCAAGCCGATACTTGCATCAATTATAGCAATTCTGGTCTGGACGTTCATTGTGA	10.8	10.3	11.3	9.6	9.3	9.5	1.3	8.2e-06	0.0062
STMJH22TV	STMJH22TV_432	NP_175046	35.2	not assigned.unknown	NOT VALIDATED NP_175046: SCPL44; catalytic/ serine carboxypeptidase [Arabidopsis thaliana]	GTAGATGCTATGGTACTGGGGCTATCCGTTTGCAGGATTAGTGAGTGCAAAACACACTAT	7.8	7.9	7.6	6.8	6.7	7.1	0.9	7.8e-06	0.0062
MICRO.4155.C2	MICRO.4155.C2_238	P27525	1.01.01.01	PS.lightreaction.photosystem II.LHC-II	NOT VALIDATED P27525: Chlorophyll a-b binding protein CP24 10B, chloroplast precursor (CAB-10B) (LHCP)	ACCCCTTGGAGCTCTTGGTTTGTAAGAGATTCATATTAAACATTTCACTGTAAAAGAGTC	11.6	11.5	9.6	14	13.1	14.4	-2.9	8.6e-06	0.0063
MICRO.49.C7	MICRO.49.C7_1727	BAB93003	19.14	tetrapyrrole synthesis.protochlorophyllide reductase	NOT VALIDATED BAB93003: NADPH:protochlorophyllide oxidoreductase [Nicotiana tabacum]	AATCAGGAGTTTACTGGAGCTGGAACAAGAACTCTTCCTCTTTTGAAAACCAGTTGTCAG	10	10	8.8	12	11.2	12.3	-2.3	8.6e-06	0.0063
BF_TUBSXXXX_0017B01_T3M.SCF	BF_TUBSXXXX_0017B01_T3M.SCF_65	NA	35.2	not assigned.unknown	NOT VALIDATED NA: NA	ACACTTGCTAAGGGTATATCTATATATATTTTAGCCATGGCTTTCTTAATAAAATTGTTT	9.8	11.5	10	14.4	14.5	13.9	-3.8	9.2e-06	0.0064
MICRO.11557.C1	MICRO.11557.C1_73	AAT39965	35.2	not assigned.unknown	NOT VALIDATED AAT39965: hypothetical protein SDM1_29t00005 [Solanum demissum]	ATGCGTCGATGGTCGAATATTTTTCGAGGGATGCAACCTTCTGTTGCAATTATGGGCTAT	7.9	7.6	8	6.6	6.6	6.9	1.1	9.2e-06	0.0064
SSBT003N06x.scf	SSBT003N06x.scf_101	NA	35.2	not assigned.unknown	NOT VALIDATED NA: NA	TGCATATTCCCAGGTCCCAGCATATCAATGATGTACTAACTCGTAAAAAGGTTCGACTTG	8.3	8.6	8.2	9.3	9.2	9.4	-0.9	9.4e-06	0.0064
STMJM13TV	STMJM13TV_215	NA	35.2	not assigned.unknown	NOT VALIDATED NA: NA	TCGCGCATTAGTGATCTATGTTTTAGCATCAACACTTTCTTTGCTTCCTGATTTTAACTG	8.1	8.3	8.4	7.4	6.7	6.7	1.3	9e-06	0.0064
bf_arrayxxx_0049b11.t7m.scf	bf_arrayxxx_0049b11.t7m.scf_559	AAL99261	35.2	not assigned.unknown	NOT VALIDATED AAL99261: aspartic proteinase inhibitor P2B4 [Solanum tuberosum]	CGTTTGGCTTCTTGTCAACCGAAATCCTTCTTGACGGTCTTTATTCCCAGGAAGTCTAGT	10.3	12.1	10.1	14.7	14.7	14.7	-3.8	1.1e-05	0.0065
bf_mxlfxxxx_0051h05.t3m.scf	bf_mxlfxxxx_0051h05.t3m.scf_231	NA	35.2	not assigned.unknown	NOT VALIDATED NA: NA	CTCCTTTCTCATACACACAGAGAATCGAGACATTCACAATTGGCCAAGATGGGTATATCC	9.8	8	9.3	7.4	7.1	6.9	1.9	1.2e-05	0.0065
MICRO.11.C1	MICRO.11.C1_587	ABB84472	26.02	misc.UDP glucosyl and glucoronyl transferases	NOT VALIDATED ABB84472: rhamnose:beta-solanine/beta-chaconine rhamnosyltransferase [Solanum tuberosum]	AATTTGGCAAATGGAGTTTGGTCAACATGACTGTATGCATTATGTTAACAATGTATCTGG	7.1	6.8	6.9	11.8	11.1	10.2	-4.1	1e-05	0.0065
MICRO.14040.C1	MICRO.14040.C1_785	CAA12400	19.9	tetrapyrrole synthesis.protoporphyrin IX oxidase	NOT VALIDATED CAA12400: protoporphyrinogen oxidase [Solanum tuberosum]	GCTTGATTTCAGTCGTTTTTGTTGTAATCTTGGTTCTCATTTCCTTGAGACAAAATGTTC	8.7	9.4	9.2	10.5	10.5	10.4	-1.3	1.1e-05	0.0065
MICRO.1503.C1	MICRO.1503.C1_1737	ABE65836	29.3.2	protein.targeting.mitochondria	NOT VALIDATED ABE65836: mitochondrial import inner membrane translocase subunit TIM44 [Arabidopsis thaliana]	TGCCCTTTCCTCCGTTGGAACGGAGGCATCATGTATTCAAATTAATGAGGAGATAGGATA	9.9	9.6	9.9	8.8	8.7	8.7	1	1.1e-05	0.0065
MICRO.189.C11	MICRO.189.C11_1174	NP_568611	26.06	misc.O- methyl transferases	NOT VALIDATED NP_568611: unknown protein [Arabidopsis thaliana]	ATCATATTTCAGCCCCGCCATACCCCCTCCAACTTTTAACTTTTTTGCAGAGTAAAAAGA	7.3	7.7	7.6	6.7	6.5	6.7	0.9	1.1e-05	0.0065
MICRO.2974.C1	MICRO.2974.C1_1107	ABD72958	27.3.21	RNA.regulation of transcription.GRAS transcription factor family	NOT VALIDATED ABD72958: GRAS1 [Solanum lycopersicum]	TCCATATAATAGATTTTCAAATTGCACAGGGAAGTCAATGGGTGTTCCTTATGCAAAATC	8	8	8.3	6.6	7	6.9	1.3	1e-05	0.0065
MICRO.3228.C1	MICRO.3228.C1_565	NP_973963	35.1	not assigned.no ontology	NOT VALIDATED NP_973963: unknown protein [Arabidopsis thaliana]	GTTCAAATTGCGTCGACAACCTGGCTGGGAATCAAACAGTTACGGATATCATGGTGATGA	8.5	8.5	8.3	6.9	6.7	7	1.6	1.1e-05	0.0065
MICRO.3649.C1	MICRO.3649.C1_856	NP_177700	27.3.11	RNA.regulation of transcription.C2H2 zinc finger family	NOT VALIDATED NP_177700: nucleic acid binding / transcription factor/ zinc ion binding [Arabidopsis thaliana]	GATAATCCAATCTGTAAGATCGAACGGATATTAAAAGTCCACAACACCAAACGTACGATC	7.8	8.3	9	7	7	7	1.4	1.1e-05	0.0065
MICRO.4359.C1	MICRO.4359.C1_909	CAC40756	20.1.07.06	stress.biotic.PR-proteins.proteinase inhibitors	NOT VALIDATED CAC40756: putative miraculin [Atropa belladonna]	TCATCATGTTTGTACCTACTTGTATTGTCTAAAATAAAGCTACGCATGTGTGATGTGTAG	10.4	11.4	10.1	13.6	14.1	14.2	-3.3	1.1e-05	0.0065
MICRO.4481.C1	MICRO.4481.C1_560	BAC43076	29.5.11.04.03.02	protein.degradation.ubiquitin.E3.SCF.FBOX	NOT VALIDATED BAC43076: unknown protein [Arabidopsis thaliana]	TCGACATTGCTGTTCTGAAAAGCTGTCCTAATATTGACAACTTCATACATTTTCTGTCTA	8.1	7.6	7.9	6.8	6.8	6.3	1.2	9.6e-06	0.0065
MICRO.712.C9	MICRO.712.C9_1	ABE81475	35.1	not assigned.no ontology	NOT VALIDATED ABE81475: hypothetical protein MtrDRAFT_AC137510g7v1 [Medicago truncatula]	GGAAGAACAAAAAATAGTCTATGGTGAATTGCTCAAGATCCCAACTCTTCCGTTATTGCT	8	8.1	7.4	6.7	6.8	6	1.3	1e-05	0.0065
PPCBF08TH	PPCBF08TH_338	P07370	1.01.01.02	PS.lightreaction.photosystem II.PSII polypeptide subunits	NOT VALIDATED P07370: Chlorophyll a-b binding protein 1B, chloroplast precursor (LHCII type I CAB-1B) (LHCP)	GTTTTGATGGCCCCTGTAAAAGTAGTTTGTGACTTTACTTTTGATAATAGAAATGGGTTC	8.2	7.3	7.2	10.8	9	10.8	-2.7	1.1e-05	0.0065
TBSK00423FD03.t3m.scf	TBSK00423FD03.t3m.scf_195	NA	35.2	not assigned.unknown	NOT VALIDATED NA: NA	ACAGATGAGCAAGCCATGCAGGATGCTATTGAAGGGATGGAACGGCCCAGCATCTTGATG	14.6	14.3	14	13.2	13.3	13.2	1.1	1.2e-05	0.0065
TBSK03731FG11.t3m.scf	TBSK03731FG11.t3m.scf_53	NA	35.2	not assigned.unknown	NOT VALIDATED NA: NA	CTAGCGGTTACACCCGTTTAGAATTCATTTCCTTTTATCTGGGAGGCACAATATCCTTGT	11	12.2	10.5	14.3	14.7	14.5	-3.3	1.1e-05	0.0065
bf_suspxxxx_0033f06.t3m.scf	bf_suspxxxx_0033f06.t3m.scf_509	AAC49376	11.3	lipid metabolism.Phospholipid synthesis	NOT VALIDATED AAC49376: GmCK3p	TTCAAAGAATGTCCTTCTATGGGACCGTCTCAGAAAGTGGCTAAATGAGGCGAAGGGTTT	9.3	8.7	8.8	8	7.5	7.2	1.4	1.2e-05	0.0067
MICRO.6307.C1	MICRO.6307.C1_380	BAD46056	20.2.3	stress.abiotic.drought/salt	NOT VALIDATED BAD46056: dehydration-responsive protein-like [Oryza sativa (japonica cultivar-group)]	GATGATCCTCTCGGAGACAGAAGATCGAGGCTGCAGTATTGAGGATCTACTTATTGAGAT	8.4	8.2	9.4	7.2	6.9	7.2	1.5	1.2e-05	0.0067
MICRO.4857.C1	MICRO.4857.C1_854	ABD32715	35.2	not assigned.unknown	NOT VALIDATED ABD32715: thylakoid membrane phosphoprotein 14 kda, chloroplast precursor, putative [Medicago truncatula]	GAGCAATCTTGCAGCTTTGCTCTTCAAAATGTAAACTCTGCTTCGTTCTTTTGCTATCTT	7.6	7.7	7.5	9.6	8.9	9.7	-1.8	1.3e-05	0.0068
153A03AF.esd	153A03AF.esd_181	NA	20.1.07.06	stress.biotic.PR-proteins.proteinase inhibitors	NOT VALIDATED NA: NA	GGGAGTAACGGTACACCCGTTAGATTCATTCCTTTTATCTACAAATATCTTTTGAAAATC	11.9	13.3	11.6	15.3	15.3	15.5	-3.1	1.5e-05	0.0069
174A09AF.esd	174A09AF.esd_410	AAZ94184	20.1.07.06	stress.biotic.PR-proteins.proteinase inhibitors	NOT VALIDATED AAZ94184: Kunitz-type protease inhibitor precursor [Solanum tuberosum]	TGTTTTAGCCCGCCTGCTGGCTAGCTACTATGTTAATGTTAATGTTGTAAATAAACACCC	11.7	13.6	11.4	16	15.9	15.8	-3.7	1.7e-05	0.0069
bf_arrayxxx_0049f12.t3m.scf	bf_arrayxxx_0049f12.t3m.scf_565	AAM10491	20.1.07.06	stress.biotic.PR-proteins.proteinase inhibitors	NOT VALIDATED AAM10491: aspartic proteinase inhibitor precursor P8G5 [Solanum tuberosum]	CTATTACTCCCCCTTTTCTTTGTCCAGTTCCGTCGTGACTGATAACTTCTGTGCAAAGGT	10.5	12.2	10	15.2	14.9	14.7	-4	1.7e-05	0.0069
bf_arrayxxx_0051c02.t3m.scf	bf_arrayxxx_0051c02.t3m.scf_455	AAZ94192	20.1.07.06	stress.biotic.PR-proteins.proteinase inhibitors	NOT VALIDATED AAZ94192: Kunitz-type protease inhibitor precursor [Solanum tuberosum]	GAACCATAGGGCAAGCAGATAGCAGCTATGACAGGATAGTCAACTCATCAAGGTTTGGTT	11.7	13	10.8	15.4	15.4	15.2	-3.5	1.4e-05	0.0069
bf_arrayxxx_0057h01.t7m.scf	bf_arrayxxx_0057h01.t7m.scf_506	NA	35.2	not assigned.unknown	NOT VALIDATED NA: NA	GGAAAGGTTGTTCGTCATGAAAGACTGCTGGGATAAGAAACCCTTTACGAAATAGGGAGA	13.3	12.4	13.5	11.5	11.7	11.5	1.5	1.5e-05	0.0069
BF_LBCHXXXX_0041E12_T3M.SCF	BF_LBCHXXXX_0041E12_T3M.SCF_108	AAT39932	35.2	not assigned.unknown	NOT VALIDATED AAT39932: NB-ARC domain containing protein [Solanum demissum]	CGTCTTGATGAAATGTCAAATTATGCGTTCAAAGTTACTACTATACAGCCTCCAGATTGG	8.4	8.2	8	7.1	7.1	7.5	1	1.6e-05	0.0069
bf_mxflxxxx_0056e09.t3m.scf	bf_mxflxxxx_0056e09.t3m.scf_319	NA	35.2	not assigned.unknown	NOT VALIDATED NA: NA	AGATCATGTGATCTTGTTATTTTTCATGGCTTTTGGCCTGTGTCGTGTGTGACAAAAAGG	6.6	6.6	6.6	7.4	7.8	8	-1.1	1.7e-05	0.0069
bf_swstxxxx_0017c04.t3m.scf	bf_swstxxxx_0017c04.t3m.scf_494	CAM67156	35.2	not assigned.unknown	NOT VALIDATED CAM67156: Hypothetical repeat protein [Leishmania infantum]	ATTGGAGGAGTTGACTGATCATGGAGAATTAAGGACTAGTCAATCTTCGAAAGAAAGTTC	7.9	7.9	7.8	6.5	6.5	6.7	1.3	1.5e-05	0.0069
cSTB6E19TH	cSTB6E19TH_365	NP_197559	35.2	not assigned.unknown	NOT VALIDATED NP_197559: unknown protein [Arabidopsis thaliana]	TTTATCAACCAGGGTTTTGCCCTTATGTGGATGAGGCTTCTGATTGTCAGACTAATGGTA	7	6.8	6.8	7.8	8.3	8.7	-1.4	1.5e-05	0.0069
MICRO.100.C2	MICRO.100.C2_1286	CAD12664	13.1.1.1	amino acid metabolism.synthesis.central amino acid metabolism.GABA	NOT VALIDATED CAD12664: viroid RNA-binding protein [Solanum lycopersicum]	TTCCATATGATTGGGGTGTTGGTACATATTTTGGAGCACAATGTCAAAAGTATGGAATGT	10.1	9.8	9.4	13.9	13.4	12.7	-3.6	1.8e-05	0.0069
MICRO.12765.C1	MICRO.12765.C1_660	AAO14628	17.2.3	hormone metabolism.auxin.induced-regulated-responsive-activated	NOT VALIDATED AAO14628: hypothetical transcription factor [Prunus persica]	GAAGGAATGCAGCTACTGAACTCTGCTGGATTGCAAGGCATAAATGGCTCAACATCAGAA	7.6	8.2	7.9	7	6.7	6.7	1.1	1.5e-05	0.0069
MICRO.13746.C1	MICRO.13746.C1_386	NA	35.2	not assigned.unknown	NOT VALIDATED NA: NA	TTTTGATTCATCTTTTTCTTTTGTTTTAAATGTATAACTTATGAACAAGTAAAATATAAT	7.2	7.9	8.1	6.7	6.5	6.6	1.1	1.6e-05	0.0069
MICRO.14179.C1	MICRO.14179.C1_1508	NA	35.2	not assigned.unknown	NOT VALIDATED NA: NA	TCACATATCTCATCGTGATGGTTGTCGGTTAGAGAATCTCCCAAATAAGAGAAAAGAGTA	8	7.7	8.3	7	7.1	6.8	1	1.3e-05	0.0069
MICRO.14458.C1	MICRO.14458.C1_935	NP_195493	27.3.22	RNA.regulation of transcription.HB,Homeobox transcription factor family	NOT VALIDATED NP_195493: HAT22; transcription factor [Arabidopsis thaliana]	TAGCAGGTCCTTGCCATGGATCTTGCGTATAGCTGGAGCTTTAGTGTAATGAGTTGCTAT	10.4	10.3	11.3	9.1	9.1	8.3	1.8	1.5e-05	0.0069
MICRO.1520.C15	MICRO.1520.C15_1017	AAK56395	33.1	development.storage proteins	NOT VALIDATED AAK56395: patatin [Solanum cardiophyllum]	TCGGGTTGTAGCTAGTAGTAACCTTATTATGCTAAATAACAAGCGCTTGCAATATTTATC	8.8	10.2	7.6	11.7	12.2	11.7	-3	1.8e-05	0.0069
MICRO.16614.C1	MICRO.16614.C1_361	NA	35.2	not assigned.unknown	NOT VALIDATED NA: NA	AATTCTAAATAACCAAAATACAGTTTATTTATGTATTCATTATTAATGTATTCATCCTAA	7.9	8.1	8.6	7.2	6.9	6.9	1.2	1.7e-05	0.0069
MICRO.1751.C42	MICRO.1751.C42_722	AAO23566	20.1.07.06	stress.biotic.PR-proteins.proteinase inhibitors	NOT VALIDATED AAO23566: serine protease inhibitor [Solanum tuberosum]	TTAGCCCTGCCTGCTGGCTAGGCTACTATGTGAATGTTGTAAAATAAAACACCTGCCTAA	11.2	13	11.2	15.5	15.5	15.3	-3.6	1.4e-05	0.0069
MICRO.2213.C3	MICRO.2213.C3_518	AAZ32858	35.1	not assigned.no ontology	NOT VALIDATED AAZ32858: BURP domain-containing protein [Medicago sativa]	TCATGCATCTTTTCTGTACTGTTTCAGTGTGCCTCTTGTTTTGCTCACTTTTCAATGGTG	10.7	11.7	11.1	12.6	12.7	12.6	-1.5	1.7e-05	0.0069
MICRO.2529.C1	MICRO.2529.C1_283	CAA63968	34.2	transport.porins	NOT VALIDATED CAA63968: pom30 [Solanum tuberosum]	TGTCAAAGTTGATACAGGATCAAATATTTTAACAACTCTTACTTTGACTGACATCGTCCC	9	8.7	9.1	7.8	6.7	7.8	1.5	1.8e-05	0.0069
MICRO.3190.C1	MICRO.3190.C1_498	ABE80217	27.3.73	RNA.regulation of transcription.Zn-finger(CCHC)	NOT VALIDATED ABE80217: Tudor; Staphylococcus nuclease subtype [Medicago truncatula]	TGCTCGTGAAGCAAAGGAATTTTTGAGAAATCGCCTTATTGGAAAACAGGTGCATGTTTC	8.2	7.7	7.7	6.4	6.3	6.7	1.4	1.7e-05	0.0069
MICRO.4359.C4	MICRO.4359.C4_26	CAC40756	20.1.07.06	stress.biotic.PR-proteins.proteinase inhibitors	NOT VALIDATED CAC40756: putative miraculin [Atropa belladonna]	TGCTAATTTCATTTCTCCTTTCATTTTGGTGTCATGCACTTGTGCTACAACAACTCCTAA	9	9.9	8.2	12	12.2	13	-3.4	1.6e-05	0.0069
MICRO.6317.C1	MICRO.6317.C1_1611	NP_200262	17.2.3	hormone metabolism.auxin.induced-regulated-responsive-activated	NOT VALIDATED NP_200262: DFL1 (DWARF IN LIGHT 1) [Arabidopsis thaliana]	AGCATTGATTCGGAACAGACTGATGAAGCTGAGCCTACAAATGCTCGTGAAAATGCAGTG	8.6	8.3	8.6	7.5	7.4	7.7	1	1.4e-05	0.0069
MICRO.718.C4	MICRO.718.C4_833	AAF64303	26.1	misc.cytochrome P450	NOT VALIDATED AAF64303: putative cytochrome P450 [Lycopersicon esculentum]	CCGGCTGGTGGTTTGGTTAATTATAAGAGTACTAGTTAAATAAATCAGGTTGAGTTGTAT	8.9	9.7	8.5	12.3	12.3	11.4	-3	1.7e-05	0.0069
MICRO.7535.C1	MICRO.7535.C1_863	NA	35.2	not assigned.unknown	NOT VALIDATED NA: NA	TTCTTCAGACTCTACTTTGTTAACTCGAGATGCTTTGTGCAATAAGCGGCTCATCAAAAG	7.3	7.8	7.1	10.1	9.1	10	-2.3	1.4e-05	0.0069
MICRO.8133.C1	MICRO.8133.C1_708	NA	35.2	not assigned.unknown	NOT VALIDATED NA: NA	CAATATTCCTAACATGAATGGCAATGGGGCCAAAAAGGGAGGTGGAGGAAATGATGGGAT	8.6	9.8	8	6.9	6.7	7.1	1.9	1.6e-05	0.0069
MICRO.8551.C1	MICRO.8551.C1_1232	NP_193515	35.1	not assigned.no ontology	NOT VALIDATED NP_193515: unknown protein [Arabidopsis thaliana]	TTGGGGATTTCTTCTTCTTCTACTTCTTGGTTTTGTAACTCTATGGAATCCTTAAAGTAG	7.9	8.3	8.5	6.8	7	7.1	1.3	1.4e-05	0.0069
MICRO.9062.C1	MICRO.9062.C1_1	NA	35.2	not assigned.unknown	NOT VALIDATED NA: NA	AGAAAATTGCAGAAAAATGTCTGGTTTGATAAATATTTGGGCAACTGAATTTTCAAAGTT	15.8	13	15.8	10.6	11	10.9	4.1	1.6e-05	0.0069
MICRO.9483.C1	MICRO.9483.C1_762	NP_001065417	29.5	protein.degradation	NOT VALIDATED NP_001065417: Os10g0565100 [Oryza sativa (japonica cultivar-group)]	AGATTTGCCCTTTTTGTGCAGAATAAACAGGGCAGGATACTTTATGTGGGAGGACCATCG	8.1	7.8	7.9	7.2	6.6	6.7	1.1	1.6e-05	0.0069
POABM12TP	POABM12TP_271	P27525	1.01.01.01	PS.lightreaction.photosystem II.LHC-II	NOT VALIDATED P27525: Chlorophyll a-b binding protein CP24 10B, chloroplast precursor (CAB-10B) (LHCP)	CCCCTCCTCTTATTTCATTCATTCTGTTGCAAAGGCTTAACCTTGTATTTTGTACCTGCA	7.4	7	6.9	8.1	8.5	8.5	-1.3	1.4e-05	0.0069
POAC259TV	POAC259TV_530	AAM63225	35.2	not assigned.unknown	NOT VALIDATED AAM63225: unknown [Arabidopsis thaliana]	TACAAGACACAACGCTAAGGATGTGGTGGGATGGATGGATACTCTTGTTTTGCCCATACT	8.2	8.3	8.4	7.5	7.4	7	1	1.5e-05	0.0069
PPCAB51TH	PPCAB51TH_74	NA	29.2.2	protein.synthesis.misc ribosomal protein	NOT VALIDATED NA: NA	AAATTGAAGTTATTTGTTGTTTAAGAAATATGTCGAGTGGATTGGTTTCTGCGTTAAAAA	6.7	6.7	6.7	7.3	8.1	8	-1.1	1.8e-05	0.0069
SSBN002F17u.scf	SSBN002F17u.scf_705	CAH59421	16.2	secondary metabolism.phenylpropanoids	NOT VALIDATED CAH59421: hypothetical protein [Plantago major]	TAATGAGTTTGGATATGCTGTTTCCGTTATATCAATGCAAGAATACCAAGATTAACCTGG	9.4	10.2	8.8	11.2	11.1	11	-1.6	1.4e-05	0.0069
TBSK02431FC07.t3m.scf	TBSK02431FC07.t3m.scf_119	NA	20.1.07.06	stress.biotic.PR-proteins.proteinase inhibitors	NOT VALIDATED NA: NA	AAACAACAAAGGTTGTGTGTAGACCAAACCTGTTTGGAACAGTTACATGATGAACAGTTG	8	8.2	7.6	9.3	9.6	9.1	-1.4	1.7e-05	0.0069
TBSK02534FD02.t3m.scf	TBSK02534FD02.t3m.scf_164	AAK56395	33.1	development.storage proteins	NOT VALIDATED AAK56395: patatin [Solanum cardiophyllum]	ACCAATAAGCCAGTAAATATTCACTAAGTCCAATTATCAAAGTCTTCCAGAATTGGATGC	8.2	8.8	7.4	9.9	10.5	10.4	-2.1	1.4e-05	0.0069
BF_LBCHXXXX_0045D07_T3M.SCF	BF_LBCHXXXX_0045D07_T3M.SCF_96	NA	35.2	not assigned.unknown	NOT VALIDATED NA: NA	TAGCTGCCGCGTGTGTCAACGAGTTTCTCTCGTCAACCGAGATTTCTCATACATTCGAAG	6.6	6.6	6.7	7.4	7.8	7.8	-1	1.8e-05	0.007
MICRO.3746.C3	MICRO.3746.C3_499	AAG22605	26.01	misc.misc2	NOT VALIDATED AAG22605: aldehyde oxidase [Lycopersicon esculentum]	GGAAATCAACGTGCTTCAAATGATACTAAACTATCCAGAATGTTGTCGTACATGTGTTGA	8.4	9.3	8.4	10.8	10.9	11.1	-2.2	1.9e-05	0.007
MICRO.5751.C1	MICRO.5751.C1_329	AAL36458	35.2	not assigned.unknown	NOT VALIDATED AAL36458: proteinase inhibitor IIa [Solanum americanum]	TCGTTCTGAAGGAAAGATGATAATTAAACCCACGGGTTGTACCACATGTTGCACCGGCTA	7	7.4	6.8	9.4	9.3	9.2	-2.3	1.9e-05	0.007
MICRO.7152.C1	MICRO.7152.C1_1064	AAU89730	35.2	not assigned.unknown	NOT VALIDATED AAU89730: putative polyprotein [Solanum tuberosum]	CAAAGAAATGGCCCCATCAAAGCATTTTCTGTTGTCATTGATGATCAGGAGCATTCAGAG	6.5	6.9	6.9	7.7	7.8	7.5	-0.9	1.9e-05	0.0071
MICRO.11259.C1	MICRO.11259.C1_226	NP_193740	29.5	protein.degradation	NOT VALIDATED NP_193740: metallopeptidase [Arabidopsis thaliana]	TGCAATGGCCATGTCTCATCTAACCAAGATTGGCTACTTTTCGATAGGTGGGAATGCTAT	12.8	12.4	12.7	11.5	11.5	11.4	1.2	2e-05	0.0072
MICRO.15471.C1	MICRO.15471.C1_1038	NP_567195	27.3.06	RNA.regulation of transcription.bHLH,Basic Helix-Loop-Helix family	NOT VALIDATED NP_567195: DNA binding / transcription factor [Arabidopsis thaliana]	AAGGACTGCTCTCCTTACTAGATTAGAACATCACTAGCTCCGAATCAGTAAGCTCTCAAT	8.7	10	8.6	10.9	11.2	10.8	-1.9	2e-05	0.0072
TBSK03583FC07.t3m.scf	TBSK03583FC07.t3m.scf_458	AAM10491	20.1.07.06	stress.biotic.PR-proteins.proteinase inhibitors	NOT VALIDATED AAM10491: aspartic proteinase inhibitor precursor P8G5 [Solanum tuberosum]	ACGATGTTGTTCGGAGACGGGAGTGAACCATATGGCAATGCAAGATAGCATCCTATTTCA	10.3	11.8	9.2	14	14.3	14.1	-3.7	2e-05	0.0072
ACDA02713C01.T3m.scf	ACDA02713C01.T3m.scf_419	NA	35.2	not assigned.unknown	NOT VALIDATED NA: NA	AACAGCCTGGATGCTGTAATTGAACGCTGAGAAATCAAGCTGGCAAAAGACTTTGCTACG	7.4	7.2	7.5	6.2	6.6	6.4	1	2.1e-05	0.0073
bf_cswbxxxx_0023a11.t3m.scf	bf_cswbxxxx_0023a11.t3m.scf_235	NA	35.2	not assigned.unknown	NOT VALIDATED NA: NA	GACCATTGGAAAGCAGGGTTAGGCTTTTGTAAAATTGCTATTTCTTCCTGCAGGTAATAG	8.4	8.4	8.2	7.1	7	7.5	1.1	2.1e-05	0.0073
MICRO.513.C2	MICRO.513.C2_1	ABB29920	35.2	not assigned.unknown	NOT VALIDATED ABB29920: CAPIP1-like [Solanum tuberosum]	TTCCAATAGGCGATGTGTTTTGGACTCTTCTAATTCACACTTTGCCTATTCTCAAAACCC	8.3	8	8.3	6.8	6.9	6.6	1.4	2e-05	0.0073
TBSK00847FG07.t3m.scf	TBSK00847FG07.t3m.scf_244	NA	35.2	not assigned.unknown	NOT VALIDATED NA: NA	CAAGGCATGCAGCAAGCCATGCAGGGATGCTATTGCAAGGGCATGAACGGCCAAGCATCT	13.3	13.2	12.8	11.7	11.8	12.2	1.2	2.1e-05	0.0073
bf_arrayxxx_0038a05.t7m.scf	bf_arrayxxx_0038a05.t7m.scf_471	NA	29.7	protein.glycosylation	NOT VALIDATED NA: NA	TATTATGTGCAACTCTCCACAGATTGGCAGCTTAGGAAACACTTTCAAGAACTTTTATTG	8.4	9.1	8.5	9.7	9.8	9.8	-1.1	2.2e-05	0.0074
MICRO.135.C7	MICRO.135.C7_1377	P14675	5.03	fermentation.ADH	NOT VALIDATED P14675: Alcohol dehydrogenase 3	TTGTGTTTCGCAATGCCATATCTCTTTCGGTTCTTGTAAAAAATGCAAATTCTCTCTGTT	15.8	14.2	15.8	12.8	13	12	2.6	2.2e-05	0.0074
MICRO.1751.C12	MICRO.1751.C12_403	Q41448	35.2	not assigned.unknown	NOT VALIDATED Q41448: Aspartic protease inhibitor 7 precursor (Cathepsin D inhibitor p749)	AGAACGCGGAGGAACCATAGGGCAAGCAGATAGGCAGCTATTTCAAGGATTGTTAAATCA	12.1	13.6	11.5	15.9	15.7	15.8	-3.4	2.2e-05	0.0074
MICRO.3549.C1	MICRO.3549.C1_567	ABC26878	35.2	not assigned.unknown	NOT VALIDATED ABC26878: NRC1 [Solanum lycopersicum]	ATGATGAAGCAAAAATTGTAATTGATCGTCTCATCGGAAGATCAGATTATGTTGAGGTTG	6.8	6.8	6.5	7.4	8.4	7.8	-1.1	2.2e-05	0.0074
MICRO.6809.C4	MICRO.6809.C4_828	Q43502	35.1	not assigned.no ontology	NOT VALIDATED Q43502: Proteinase inhibitor type-2 CEVI57 precursor (Proteinase inhibitor type II CEVI57)	GAGAAAAAGATCATCCATAATTGAGGACTTGGCTCCTCTCTAGTGGTGATCTCCTTTGGT	8.2	10	7.9	13.1	13.5	12.4	-4.3	2.2e-05	0.0074
MICRO.9592.C1	MICRO.9592.C1_939	NP_195987	35.2	not assigned.unknown	NOT VALIDATED NP_195987: unknown protein [Arabidopsis thaliana]	GTACTATGACTTAGGCTATAGTTTGTAGTGCAACCCAAAGAGTTTTTTGGGGTGTTAGAC	8.3	7.9	8.6	9.5	10.3	9.8	-1.6	2.2e-05	0.0074
SSBN003J05u.scf	SSBN003J05u.scf_36	NA	35.2	not assigned.unknown	NOT VALIDATED NA: NA	ATTTCTCTTACCGCATGGTCATCGATTCCTGATACACAAAAGTTGCAAAGGCAAAGTCCC	7.9	8.2	8	7.2	6.7	7.3	1	2.2e-05	0.0074
MICRO.1184.C1	MICRO.1184.C1_484	CAA74176	11.1.06	lipid metabolism.FA synthesis and FA elongation.enoyl ACP reductase	NOT VALIDATED CAA74176: enoyl-ACP reductase [Nicotiana tabacum]	TCAGAGCCAAGAGTTCTCGGCCATCGGCTTTCGTGAAATTATCTACTGCTGTATGATTGA	7.5	7.5	7.5	8.9	8.8	8.9	-1.4	2.3e-05	0.0075
bf_cswbxxxx_0032a09.t3m.scf	bf_cswbxxxx_0032a09.t3m.scf_572	NA	35.2	not assigned.unknown	NOT VALIDATED NA: NA	TATTAGCCTGAAATATTCTAAAATGGAGCTATATGCTAAGTCGGGATTCATATGACTGAC	8	7.9	7.7	7	6.9	7	0.9	2.3e-05	0.0076
MICRO.14575.C1	MICRO.14575.C1_1172	NP_192029	35.1.19	not assigned.no ontology.C2 domain-containing protein	NOT VALIDATED NP_192029: unknown protein [Arabidopsis thaliana]	ACATTTTGTGATGTAACATCTTGTTCTTGATTCTGCATTGGATCAAACTGTTGTTCTGTG	6.6	6.8	6.9	7.8	8.4	7.8	-1.2	2.4e-05	0.0076
MICRO.16653.C1	MICRO.16653.C1_104	NA	35.2	not assigned.unknown	NOT VALIDATED NA: NA	TGAAGGACAGAAGATTGGAAAACAAAAAAGAAAGTGCTCAGGGCCTCTGGTGGATGAAGT	6.8	6.6	7.3	8.6	8.7	9	-1.9	2.4e-05	0.0076
MICRO.2074.C1	MICRO.2074.C1_2086	NP_001056160	30.3	signalling.calcium	NOT VALIDATED NP_001056160: Os05g0535900 [Oryza sativa (japonica cultivar-group)]	TTAGCCCCATATGCCTTGTATCTTGAGTGAAGAACATTCGGCTCTTTTGGTCTCAGTGAG	7.6	7.1	7.8	8.6	9.1	8.8	-1.3	2.4e-05	0.0076
MICRO.67.C2	MICRO.67.C2_263	ABE89592	27.3.99	RNA.regulation of transcription.unclassified	NOT VALIDATED ABE89592: Beta tubulin; Remorin, C-terminal region [Medicago truncatula]	TTTTTCCTTTTGGTGGGTTTTTTGGTTTGCAAAATTCATTGGAATAGAATGTCAAGACCG	6.6	6.1	6.2	7	7.2	7.4	-0.9	2.4e-05	0.0076
MICRO.9077.C1	MICRO.9077.C1_679	NP_181959	11.6	lipid metabolism.lipid transfer proteins etc	NOT VALIDATED NP_181959: lipid binding [Arabidopsis thaliana]	AGGAGATGGATGGGATTTATGGAAATGACTATGGGCTTTTTGGTCATTTTGGTGCTTTCA	8.9	9.5	8.9	10.7	10.4	11	-1.6	2.3e-05	0.0076
STMHT38TV	STMHT38TV_484	NP_001031032	29.5.11.04.02	protein.degradation.ubiquitin.E3.RING	NOT VALIDATED NP_001031032: protein binding / ubiquitin-protein ligase/ zinc ion binding [Arabidopsis thaliana]	ATATGCTTCTGCGGATAAATACACATATATTTCTCTAGGCTTCTTTCATTTGTCTCACTG	9.7	9.9	9.4	10.5	10.7	11.3	-1.1	2.4e-05	0.0076
POCCU84TV	POCCU84TV_581	AAF70243	19.11	tetrapyrrole synthesis.magnesium protoporphyrin IX methyltransferase	NOT VALIDATED AAF70243: S-adenosyl-L-methionine Mg-protoporphyrin IX methyltranserase [Nicotiana tabacum]	CCCCCCAGTTTCTAACTTGTATAATAGTTTCCAATGTTTCTGGATTCTGCTTCTGCCTGG	7.5	7.5	7.3	8.9	8.6	8.3	-1.2	2.5e-05	0.0077
bf_cswcxxxx_0012d02.t3m.scf	bf_cswcxxxx_0012d02.t3m.scf_678	NP_566006	13.1.3.5	amino acid metabolism.synthesis.aspartate family.lysine	NOT VALIDATED NP_566006: dihydrodipicolinate reductase [Arabidopsis thaliana]	GAGAGAAACAAATGGTGGGTTCAATTTTCTTGGTTTGGTCCTTCCAGTGGTTCTTGATGC	8.7	9.1	8.6	9.7	9.6	9.8	-0.9	2.6e-05	0.008
MICRO.3790.C1	MICRO.3790.C1_72	NA	30.6	signalling.MAP kinases	NOT VALIDATED NA: NA	GGAAAACCCTAAAAACTGCTGGATGGGACTTCAGCATTGGAGGATCATCTAGTACTGGAA	8.1	8	7.6	6.7	6.2	6.8	1.3	2.6e-05	0.008
MICRO.61.C2	MICRO.61.C2_1636	NA	35.2	not assigned.unknown	NOT VALIDATED NA: NA	ACTATGTTTCTTTTAATTGGTGGTGCAAGTGTCCCATCATTGGGAAATCCTGTCATGGGC	7.1	6.9	6.9	7.6	8.1	8	-0.9	2.6e-05	0.008
MICRO.655.C1	MICRO.655.C1_899	NP_564298	29.5.05	protein.degradation.serine protease	NOT VALIDATED NP_564298: SCPL45; catalytic/ serine carboxypeptidase [Arabidopsis thaliana]	CATGAAAAGGACGTGCGAAAATCTGGTGATCCATGCCTTACTGATAGGATATATATGTAC	7.6	7.8	7.8	8.7	8.7	9	-1	2.6e-05	0.008
POACZ03TP	POACZ03TP_969	AAT40504	35.2	not assigned.unknown	NOT VALIDATED AAT40504: Polyprotein, putative [Solanum demissum]	ATACACTTCACCCTCTCCAGCCCCCACGTGTGGAACTATACTAGGTATGTTGTAGAAATA	7.3	8.2	7.6	6.5	6.5	6.7	1.1	2.7e-05	0.008
POAE952TP	POAE952TP_427	NA	35.1	not assigned.no ontology	NOT VALIDATED NA: NA	AGCTTCACTTAATCCGCAATATGAACTGAGCGTTGAGTACATATTTGTCCTTCAGGTTTA	6.7	6.6	6.5	7.3	7.9	8	-1.1	2.8e-05	0.0083
bf_stolxxxx_0048b11.t7m.scf	bf_stolxxxx_0048b11.t7m.scf_353	NA	2.1.2.05	major CHO metabolism.synthesis.starch.transporter	NOT VALIDATED NA: NA	TGGTGGGCTTTGAATGTTGGTTTTCATTATTTACAACAAGAACGTTTTGAATGCATTTCC	7.9	9.2	7.8	10.9	10.8	10.8	-2.5	2.9e-05	0.0086
MICRO.16282.C1	MICRO.16282.C1_840	NP_566935	26.22	misc.short chain dehydrogenase/reductase (SDR)	NOT VALIDATED NP_566935: oxidoreductase [Arabidopsis thaliana]	GATCTGCTTGGACCCAAGAGATTGATCTCCACCCCTCCAACCAAAGATACATCTAAAGAT	7.5	7.3	7.9	6.7	6.6	6.4	1	2.9e-05	0.0086
POCCU69TV	POCCU69TV_69	NA	27.3.07	RNA.regulation of transcription.C2C2(Zn) CO-like, Constans-like zinc finger family	NOT VALIDATED NA: NA	CGATGAAGAAACTGACAGAGAAGATGAAGGGGAAGAGGGGGAAATTGATTTGGAAGATAT	7.4	7.7	8	6.4	6.6	6.8	1.1	2.9e-05	0.0086
STMDB52TV	STMDB52TV_517	CAB60838	35.2	not assigned.unknown	NOT VALIDATED CAB60838: CycD3;3 [Solanum lycopersicum]	TAATGGTGTACTGTCTATAGTGGGGCTATGAGATTTTGTACTAGTAAAGATGGTTTGGCA	7.5	7.7	7.7	6.8	6.6	6.6	1	2.9e-05	0.0086
148G01AF.esd	148G01AF.esd_33	NA	35.2	not assigned.unknown	NOT VALIDATED NA: NA	CCTTACAGAAGTCGGGAACTTTAAGCCAGAAATGGAATGGCAAAACAGTCGGATACATAC	8.8	9.5	9.2	7.1	7.4	7.7	1.8	3e-05	0.0088
bf_cswbxxxx_0028d02.t3m.scf	bf_cswbxxxx_0028d02.t3m.scf_151	Q41480	35.2	not assigned.unknown	NOT VALIDATED Q41480: Aspartic protease inhibitor 1 precursor (pA1) (gCDI-A1) (STPIA) (STPID)	TTTCCACATTTTTGGGTGTCCTTAGGTGTGATTTATACCTAGTAAATTCCCCAAATTCAG	7.2	8.2	7.3	9.2	9.6	9.7	-1.9	3.1e-05	0.009
bf_stolxxxx_0043c11.t3m.scf	bf_stolxxxx_0043c11.t3m.scf_288	NA	35.2	not assigned.unknown	NOT VALIDATED NA: NA	GAATTTGAAGCCGCTCGTGCTTCGTCAAACTCAAGAACTCATTCTTATCAGGTGCGCAAT	8.8	8.3	8.3	7.2	6.8	7.6	1.3	3.2e-05	0.009
MICRO.1226.C2	MICRO.1226.C2_704	NA	35.2	not assigned.unknown	NOT VALIDATED NA: NA	TTTTTGCTTAGAGTTCCTGGTACAAAAAGTTATCAGTAAGTTTTTGAGTTAGTACTGCCC	6.4	6.4	6.9	7.7	8.8	7.8	-1.5	3.2e-05	0.009
MICRO.16375.C1	MICRO.16375.C1_587	ABO84635	27.3.09	RNA.regulation of transcription.C2C2(Zn) GATA transcription factor family	NOT VALIDATED ABO84635: Zinc finger, GATA-type; ZIM; CCT [Medicago truncatula]	TGATTCATTGTGTCCTGTACATCGTAAGCTAGTTGGAATTCTACACTTTGTGGTTGTATA	11	11	11	12.1	11.9	12.6	-1.2	3.2e-05	0.009
MICRO.7181.C1	MICRO.7181.C1_740	NA	35.2	not assigned.unknown	NOT VALIDATED NA: NA	CAGAAATAGTCTTTTAATGCTTCATTCTCCTACACTGTACTTTGTCGTTGCAAACTGGCT	6.6	6.3	6.4	7.5	7.2	7.6	-1	3.1e-05	0.009
SDBN003B10u.scf	SDBN003B10u.scf_191	NA	35.2	not assigned.unknown	NOT VALIDATED NA: NA	TGATCATCAGCTGATGACAATTTTTCACGTTCGAGTTTTTGGAGAGAACCTGCATCGGCT	6.3	6.2	6.5	7	7.3	7.7	-1	3.3e-05	0.0092
MICRO.16996.C1	MICRO.16996.C1_240	NA	35.2	not assigned.unknown	NOT VALIDATED NA: NA	GGGTCTTGCAGCCATTAATGGGGTCTTTTCTGCTTGAACAAACAAGAAAAAATGGCAGCT	15.8	13	15.8	11.5	11.2	10.5	3.8	3.4e-05	0.0093
bf_arrayxxx_0076g06.t7m.scf	bf_arrayxxx_0076g06.t7m.scf_20	NA	13.1.6.1.5	amino acid metabolism.synthesis.aromatic aa.chorismate.shikimate kinase	NOT VALIDATED NA: NA	GGGTATTCAAATTGGATATTTTCAAACCTGCTCTTTTCTATAGTAAGGGGAAAACCAAGA	8.1	7.7	8.3	7.1	6.8	7	1.1	3.5e-05	0.0094
MICRO.12857.C1	MICRO.12857.C1_922	NP_001030726	27.3.41	RNA.regulation of transcription.B3 transcription factor family	NOT VALIDATED NP_001030726: DNA binding [Arabidopsis thaliana]	TGACATTATAACTTAGTATTAATGCCGAAAATCAACCATGCGAGTGTAATGGTGCAATAG	7.4	7.6	7.5	6.5	6.6	6.4	1	3.5e-05	0.0094
MICRO.4501.C1	MICRO.4501.C1_1157	ABA46754	35.1	not assigned.no ontology	NOT VALIDATED ABA46754: unknown [Solanum tuberosum]	TGGCCTTCACTCGATGTTTATATTAAGTCAATAAATGCATGACATGTATTTTCTCCATCC	7.9	8.4	8.1	7	7	6.6	1.3	3.5e-05	0.0094
STMCP68TV	STMCP68TV_99	NA	35.2	not assigned.unknown	NOT VALIDATED NA: NA	ATCCTGTTATCTCACCCCAACAAGGTCTCTCACTACAAGAGTTGAAGAAGGTGCAGTCAT	9.1	9.1	9.2	8.2	8.2	7.3	1.2	3.5e-05	0.0094
STMJL85TV	STMJL85TV_418	NA	35.2	not assigned.unknown	NOT VALIDATED NA: NA	TGTGGCAAATAATAAATTAGCTATAGACATAGCAACCTTTACCCACTGTTTGAATGGTTG	7.3	7	7.3	8.3	8.1	8.3	-1.1	3.4e-05	0.0094
TBSK02775FH03.t3m.scf	TBSK02775FH03.t3m.scf_55	NA	35.2	not assigned.unknown	NOT VALIDATED NA: NA	AGGGTGTGGATTCGTTACCTTCAAGATGAGCAAGCCATGAGGATGCTATTGAAGGGATGA	15.6	15.4	14.9	14.1	14.3	14.1	1.1	3.4e-05	0.0094
053B05AF.esd	053B05AF.esd_991	NA	33.1	development.storage proteins	NOT VALIDATED NA: NA	CTAAAAGAGGGTTTGGCAAAATTTGCTTTCTTGATTAGGAAGAAACTTCGAGCAAACAAA	8.1	9.2	7.4	10.1	10.9	10.1	-2.2	3.9e-05	0.0095
ACDA01685E05.T3m.scf	ACDA01685E05.T3m.scf_231	NA	35.2	not assigned.unknown	NOT VALIDATED NA: NA	ATGTCTCTCTATGTAATGTGTGTTTGGATTATGTAAACCGTTTTGGGTTGTGCTTAATGT	14.2	15.2	13.3	16	16	16	-1.8	3.6e-05	0.0095
ACDA02303H11.T3m.scf	ACDA02303H11.T3m.scf_78	NA	35.2	not assigned.unknown	NOT VALIDATED NA: NA	ACAAGCCATCAGTTTGCAAGAGACTGTTGGTGCCAACGGTGGAGGCTACTGATCGTGGGT	15.1	14.7	14.3	13.3	13	13.2	1.6	3.6e-05	0.0095
BF_TUBSXXXX_0044D07_T3M.SCF	BF_TUBSXXXX_0044D07_T3M.SCF_220	NA	35.2	not assigned.unknown	NOT VALIDATED NA: NA	TTGTCTCTCTATGTAATTGTTGTCGCTTTGTGATATATTGTAACCTTTTTGTGTTTGCGG	7.6	9.2	6.9	10.1	11.3	10.2	-2.6	3.8e-05	0.0095
BPLI16H10TH	BPLI16H10TH_622	NA	35.2	not assigned.unknown	NOT VALIDATED NA: NA	TTTAGGCCAGTGATCATTGTTATTTTACTGGGCCAATTGTAGTGGACTTTATAGTCTTTT	6.7	6.4	6.7	7.2	8	8	-1.1	3.8e-05	0.0095
MICRO.13050.C2	MICRO.13050.C2_130	NP_196277	35.2	not assigned.unknown	NOT VALIDATED NP_196277: unknown protein [Arabidopsis thaliana]	AAATTCTGCAAAACCATGGCCGTTTTCTGTAACAATCTCGAAAACAGCTGCAACGCCCTC	8.2	8.1	8	6.9	7.4	6.8	1.1	3.8e-05	0.0095
MICRO.1451.C1	MICRO.1451.C1_1353	ABE91893	35.2	not assigned.unknown	NOT VALIDATED ABE91893: Protein of unknown function DUF647 [Medicago truncatula]	TAAGGCACCAGTACCCTAGACTATGACCGAAATTCTAGAGACACTTTAACTAAACTAAGA	10.2	8.8	10.5	7.1	8.6	6.7	2.4	3.6e-05	0.0095
MICRO.17321.C1	MICRO.17321.C1_1542	AAM50521	27.3.27	RNA.regulation of transcription.NAC domain transcription factor family	NOT VALIDATED AAM50521: nam-like protein 18 [Petunia x hybrida]	AATGGTGTAAGCATGTAACTGTGGGAGATCAAAGTTGGTGACGTTGTGATCTTTTTTACT	10.6	9.8	10.7	8.1	8.4	7.3	2.5	3.7e-05	0.0095
MICRO.17519.C1	MICRO.17519.C1_551	NP_172466	35.1	not assigned.no ontology	NOT VALIDATED NP_172466: unknown protein [Arabidopsis thaliana]	GGTAAACTACTTCAAGGTAGTACCTCGTTGCTCGAACTCTTCAAAAATATGTATTGTTGG	11.3	10.8	11.2	9.4	9.7	9.6	1.5	3.7e-05	0.0095
MICRO.576.C1	MICRO.576.C1_1322	NP_199903	35.1.3	not assigned.no ontology.armadillo/beta-catenin repeat family protein	NOT VALIDATED NP_199903: unknown protein [Arabidopsis thaliana]	TTAGGTGGTAGGATTGCTGCAGCAATGCATTTATGATTTTTGGATACACACAGAACCCGA	7.2	7.5	7.1	6.3	6.4	6.3	1	3.9e-05	0.0095
MICRO.6276.C2	MICRO.6276.C2_803	ABA40457	17.2.3	hormone metabolism.auxin.induced-regulated-responsive-activated	NOT VALIDATED ABA40457: TSJT1-like protein [Solanum tuberosum]	GATGAACTTCCCAAGTTGAGTCATGAATGTCATAATGTTAATCACAAATGGTATGCTACT	15.7	14.8	15.3	13.7	14.4	13.9	1.2	3.7e-05	0.0095
MICRO.6487.C1	MICRO.6487.C1_1178	BAE71200	35.1	not assigned.no ontology	NOT VALIDATED BAE71200: hypothetical protein [Trifolium pratense]	TATGGCTGAACTTGGTGTTCCACTCACCAAAGAACTTGGCTTTCACCAGTACGATGTGTA	8	7.8	7.5	6.5	6.9	7	1	3.9e-05	0.0095
MICRO.846.C1	MICRO.846.C1_872	ABG73415	1.01.01.01	PS.lightreaction.photosystem II.LHC-II	NOT VALIDATED ABG73415: chloroplast pigment-binding protein CP29 [Nicotiana tabacum]	GACACCTTCGGATTCTTCTCTTAAGCAACATGTTTTCGTTGAGGATGGTTTTTACGTATA	11	11.1	9.7	12.6	12.2	12.2	-1.7	3.7e-05	0.0095
TBSK00661FH01.t3m.scf	TBSK00661FH01.t3m.scf_169	Q41448	20.1.07.06	stress.biotic.PR-proteins.proteinase inhibitors	NOT VALIDATED Q41448: Aspartic protease inhibitor 7 precursor (Cathepsin D inhibitor p749)	TTATCGCATTGATTTCCACGATATTTGGGGTGCCCTTACGTGTGTGATGTATACCTAGGA	9.6	11	9.1	13.2	13.2	13.4	-3.3	3.9e-05	0.0095
TBSK01332FG12.t3m.scf	TBSK01332FG12.t3m.scf_11	NA	20.1.07.06	stress.biotic.PR-proteins.proteinase inhibitors	NOT VALIDATED NA: NA	ACACATGGTAAAAAATGAATCCTAATTCGGAGTTATCGCATTATTTCCACATTTTGGGGT	12	13	11.7	14.9	14.9	15.2	-2.8	3.8e-05	0.0095
bf_arrayxxx_0037h09.t7m.scf	bf_arrayxxx_0037h09.t7m.scf_687	NP_566515	35.1	not assigned.no ontology	NOT VALIDATED NP_566515: signal transducer [Arabidopsis thaliana]	GAAGGTAGAAAAGGGATAGTTTGTTTTCTGTAATCAGCAATTGTAGAGATGGAAATCTTG	7.1	6.7	7.3	8.1	8.6	8	-1.2	4.2e-05	0.0096
bf_arrayxxx_0052c01.t3m.scf	bf_arrayxxx_0052c01.t3m.scf_662	AAZ75956	33.1	development.storage proteins	NOT VALIDATED AAZ75956: patatin precursor [Solanum tuberosum]	TACTATTAATGGCGATCAATATGAGTGCAGACTCTTGTTGATGGTGCTGATGCTACTGTG	7.4	8.1	6.8	8.6	9.3	8.9	-1.6	4e-05	0.0096
BF_LBCHXXXX_0004E03_T3M.SCF	BF_LBCHXXXX_0004E03_T3M.SCF_299	CAM67156	35.2	not assigned.unknown	NOT VALIDATED CAM67156: Hypothetical repeat protein [Leishmania infantum]	AAATTCCAAGACCTAGCTTTGCTTTTATTTTTCCCTTTGCAGATGAATTGGCCTACATTT	7.7	7.3	6.5	9.4	8.7	9.4	-2	4.4e-05	0.0096
BF_LBCHXXXX_0024E03_T3M.SCF	BF_LBCHXXXX_0024E03_T3M.SCF_37	NA	35.2	not assigned.unknown	NOT VALIDATED NA: NA	AAACACAAAAAACAGCACCAAAATCCTAAATCCAATGTCTTTTTCCAGATTTTAAAGAGT	8.9	8.1	9	7.7	7.1	7	1.4	4.4e-05	0.0096
bf_mxflxxxx_0013d10.t3m.scf	bf_mxflxxxx_0013d10.t3m.scf_604	EAY89304	35.1	not assigned.no ontology	NOT VALIDATED EAY89304: hypothetical protein OsI_010537 [Oryza sativa (indica cultivar-group)]	TTTTGAGAAGGCTTTAGAATTCTCTAGAACTTGTAGAGAATTCTAGAATGTGGATCGAAG	6.7	6.2	6.6	7.6	7.7	8.2	-1.3	4.1e-05	0.0096
bf_mxflxxxx_0043h07.t3m.scf	bf_mxflxxxx_0043h07.t3m.scf_33	NA	35.2	not assigned.unknown	NOT VALIDATED NA: NA	GTTGTCGAGCTTCCTAGAGGATGAGAAGGATCTCCTGCATGGGTGGCGGTATGGGTGGCG	11.6	11.6	11.5	10.8	10.9	10.8	0.7	4.4e-05	0.0096
cSTD12O12TH	cSTD12O12TH_111	NP_172277	26.13	misc.acid and other phosphatases	NOT VALIDATED NP_172277: unknown protein [Arabidopsis thaliana]	TTTGAGAGATAGAGCTCAGGTTGAGCAGTTGCTGCGATACATTGTTGAAGTGCCTTCTGA	7.7	7.5	7.6	6.7	6.8	6.5	1	4.3e-05	0.0096
MICRO.10694.C1	MICRO.10694.C1_21	NA	35.2	not assigned.unknown	NOT VALIDATED NA: NA	GTAACATACAAGACAAATACTGCCAACTCTGAATCAGAGTCTGAAAAAGTCACATACAAG	9	8.4	8.7	7	7.5	7.7	1.3	4.3e-05	0.0096
MICRO.11259.C2	MICRO.11259.C2_1	NP_193740	29.5	protein.degradation	NOT VALIDATED NP_193740: metallopeptidase [Arabidopsis thaliana]	TGTTGGAGAGATATCAACTTGGCCAAGTGCAAGTAATGTCATTCCAGGCCAGGTGACATT	12.2	11.8	12.1	10.9	10	10.9	1.4	4.3e-05	0.0096
MICRO.13820.C1	MICRO.13820.C1_1003	BAF00295	27.3.11	RNA.regulation of transcription.C2H2 zinc finger family	NOT VALIDATED BAF00295: hypothetical protein [Arabidopsis thaliana]	TCTGGGGGCTGCAATCAGGAGAACTAAGCTTTTCTCCTATCATGCCCAAACATGTCAAAT	9.5	9.2	9.6	8.6	8.4	7.5	1.3	4.2e-05	0.0096
MICRO.14509.C1	MICRO.14509.C1_269	NA	35.2	not assigned.unknown	NOT VALIDATED NA: NA	CACTAATGGACTCTACTGGTTTGAGTGCTTCTGAGCTGGATGACCGACCGCCTGTATGTT	6.5	6.8	6.7	7.4	7.4	7.6	-0.8	4.3e-05	0.0096
MICRO.1453.C1	MICRO.1453.C1_91	AAG35472	19.1	tetrapyrrole synthesis.magnesium chelatase	NOT VALIDATED AAG35472: sulfur [Nicotiana tabacum]	CGACTCGGGTTTACTTGTTGTTGAGAAAATTTTACGAGGTTTTCGGCTAAGGAGATAGAG	9.9	10.7	9.2	11.7	11.4	11.6	-1.6	4.2e-05	0.0096
MICRO.6059.C3	MICRO.6059.C3_744	NA	35.2	not assigned.unknown	NOT VALIDATED NA: NA	ATTATATTGCTGTCTTTATGTATTGTGTATGCCTGTACTTTCTTCCCTTTAGCAGGTCTG	8.2	8.1	7.8	7.1	7.3	7.3	0.8	4.2e-05	0.0096
MICRO.764.C2	MICRO.764.C2_630	NP_565728	35.2	not assigned.unknown	NOT VALIDATED NP_565728: unknown protein [Arabidopsis thaliana]	AGTTATTAATTGACCATAACATGGATAGAGTGGAAGATGATGAAATATAGCAGGTGTGAC	8.6	8.6	8.3	7.9	7.4	7.2	1	4.2e-05	0.0096
MICRO.7982.C1	MICRO.7982.C1_744	NA	35.2	not assigned.unknown	NOT VALIDATED NA: NA	TTTTTTAATTGTATGTGTTGGTGTTTTTAGTTGTTAAACTCTGTTTAGTCTGCTATTTTG	9.2	9.7	9.4	10.5	10.2	10.9	-1.1	4.2e-05	0.0096
MICRO.8442.C1	MICRO.8442.C1_790	BAB08350	35.2	not assigned.unknown	NOT VALIDATED BAB08350: unnamed protein product [Arabidopsis thaliana]	TAGTCAGCCAATGTGATGTAAAATATGTGCATATACTTCAGCAATTGTAATTTGACGGTG	9.7	10.1	9.3	10.8	11.2	10.7	-1.2	4.4e-05	0.0096
MICRO.9103.C1	MICRO.9103.C1_781	NP_001046611	35.2	not assigned.unknown	NOT VALIDATED NP_001046611: Os02g0297600 [Oryza sativa (japonica cultivar-group)]	CTGTCGGTATTAAGCAGAAGCATAACATTGATGCTGCTGTAAAGAAGTCTCAGACGACTT	8.6	8	8.8	7.6	6.9	6.8	1.4	4.1e-05	0.0096
POACO39TV	POACO39TV_785	ABE86301	26.16	misc.myrosinases-lectin-jacalin	NOT VALIDATED ABE86301: Cyclin-like F-box; Galactose-binding like [Medicago truncatula]	TTGTTCATGTGTACTTTGAAGTTTGATCTTAACAAGCGAATGGAAGCAATATTCTTTGGG	8.8	9.4	8.7	9.8	10.6	10.7	-1.4	4.2e-05	0.0096
SDBN005H01u.scf	SDBN005H01u.scf_102	AAT96389	28.1.3	DNA.synthesis/chromatin structure.histone	NOT VALIDATED AAT96389: centromeric histone [Olimarabidopsis pumila]	GCTTCGAGAAATCAGACACTTCCAGAAGACGTGGAATCTTGTTATTCCAGCTGCTCCTTT	8.5	8	8.3	7.7	6.9	7	1.1	4.3e-05	0.0096
TBSK02452FE04.t3m.scf	TBSK02452FE04.t3m.scf_31	AAZ75958	33.1	development.storage proteins	NOT VALIDATED AAZ75958: patatin precursor [Solanum tuberosum]	TTTTCATGCATATTATCAACTACTAGTTCAACATGTGACTACTGTGGAAGAAATGGTGAC	6.8	6.8	6.7	8.1	7.9	8.1	-1.3	4.2e-05	0.0096
MICRO.7170.C1	MICRO.7170.C1_653	NP_568944	35.1	not assigned.no ontology	NOT VALIDATED NP_568944: BON1 (BONZAI1); calcium-dependent phospholipid binding [Arabidopsis thaliana]	AAGTGATCCATTTCTGGTGGTATCCAAAACTACTGAAAGTGGAAATTGTCGTTCCATTTG	8.1	8.4	8.3	7	7.3	6.9	1.2	4.5e-05	0.0098
bf_arrayxxx_0045b12.t7m.scf	bf_arrayxxx_0045b12.t7m.scf_670	AAZ32858	35.1	not assigned.no ontology	NOT VALIDATED AAZ32858: BURP domain-containing protein [Medicago sativa]	TTACCTTCCTTTCCTGTGGAGAGATCCAAATTAAATAAAACAGATACGATTTGGCTGCTA	11.4	12.5	11.7	13.5	13.1	13.3	-1.4	4.6e-05	0.0099
MICRO.12950.C1	MICRO.12950.C1_564	CAB16830	35.2	not assigned.unknown	NOT VALIDATED CAB16830: hypothetical protein [Arabidopsis thaliana]	AAAGGATCGAAGCTTGTATTTGAGGTGGTTTATCACTTATTTGTGAAGAGTGTGTTTGTA	9.3	9.7	9.2	10.4	10.4	10.4	-1	4.6e-05	0.0099
MICRO.3154.C2	MICRO.3154.C2_575	ABE84254	17.5.3	hormone metabolism.ethylene.induced-regulated-responsive-activated	NOT VALIDATED ABE84254: Universal stress protein (Usp) [Medicago truncatula]	AGGTAATGCTTGTGTGTTGCTGCGTTGTATACAGGTTAAGGTGGAGACGATAGTAGAGCA	12.1	10.6	12.8	9.2	6.9	8.2	3.7	4.7e-05	0.0099
MICRO.8803.C3	MICRO.8803.C3_21	ABN05859	35.2	not assigned.unknown	NOT VALIDATED ABN05859: Glutamine amidotransferase class-I [Medicago truncatula]	CTCTCTCTAGACCTTCCTCTAGAGGGAGAACTTATATATATCAGTGAGTGAGAGGATTTA	8.6	7.3	8.5	6.7	6.8	6.5	1.5	4.6e-05	0.0099
cSTB23F5TH	cSTB23F5TH_100	AAO52679	28.1	DNA.synthesis/chromatin structure	NOT VALIDATED AAO52679: putative DNA helicase RecQsim [Brassica napus]	AAGGCTGCTGCTTACAATGCTAAGTTGCCAAAATCACATCTGAGGCAGGTGCATAAGGAA	8.2	7.9	8.2	7.1	6.9	7.4	1	4.9e-05	0.01
MICRO.10162.C3	MICRO.10162.C3_358	NP_564328	35.1	not assigned.no ontology	NOT VALIDATED NP_564328: COR414-TM1 [Arabidopsis thaliana]	GAGATCATTGTCTAAGGTTGTAGTCAAGGGTTTAGCTACTCATTTTCTTTGGACGCTGTT	6.7	6.7	6.6	7.8	7.8	7.3	-1	5e-05	0.01
MICRO.11107.C2	MICRO.11107.C2_54	NP_568142	35.2	not assigned.unknown	NOT VALIDATED NP_568142: unknown protein [Arabidopsis thaliana]	TTTTTTGTGATCCAACCCCTATGGAAAATATACACTCCAAAGAAGGAACGAAGGATGAAG	10.9	9.6	11.1	9.2	8.7	8.7	1.7	5.1e-05	0.01
MICRO.13146.C1	MICRO.13146.C1_672	NP_001054036	35.1.1	not assigned.no ontology.ABC1 family protein	NOT VALIDATED NP_001054036: Os04g0640500 [Oryza sativa (japonica cultivar-group)]	TATCTTAAAAGGCTGAGAAGATCAGTTCCTAAAACTATGCAGTTGCAAGAAATGTACAAG	8.2	8.3	7.9	7.4	7.3	7.3	0.8	5.3e-05	0.01
MICRO.1328.C2	MICRO.1328.C2_541	NA	35.2	not assigned.unknown	NOT VALIDATED NA: NA	TGGTTATGCAATTGCGTTTCCTCTTTTTCTTTCGGTAGAGCAGGGCAGGATGGAAAACGT	6.6	6.5	6.6	7.5	7.3	7.6	-0.9	4.9e-05	0.01
MICRO.14405.C2	MICRO.14405.C2_794	NP_182139	29.5.11.04.02	protein.degradation.ubiquitin.E3.RING	NOT VALIDATED NP_182139: protein binding / ubiquitin-protein ligase/ zinc ion binding [Arabidopsis thaliana]	TTGCCCTTTTTACTATTAGGGTTAAATCATTTCTTAGAGGTGGAATTTGCTTTGGTGTTG	6.7	6.9	6.6	7.9	7.6	7.8	-1	5e-05	0.01
MICRO.15101.C1	MICRO.15101.C1_1512	BAD80835	29.5	protein.degradation	NOT VALIDATED BAD80835: nucellin-like protein [Daucus carota]	TCCGAGAAACAAAAAATGTTCCAAGAGGTTTATCCTTTTGAATGCTGATGAATAATGGTC	7.8	7.6	8	9.6	9	9.2	-1.4	5.2e-05	0.01
MICRO.1520.C12	MICRO.1520.C12_978	ABC55693	33.1	development.storage proteins	NOT VALIDATED ABC55693: patatin protein 06 [Solanum tuberosum]	TGATAGGAAAGAAACTCCGAGCAAAACAAAGCGTCTTATTAATTTAAGGTCTCGGGTTGT	13.5	14.6	12.3	15.6	15.6	15.6	-2.2	5.2e-05	0.01
MICRO.15795.C1	MICRO.15795.C1_737	NP_173345	23.1.2.30	nucleotide metabolism.synthesis.purine.IMP dehydrogenase	NOT VALIDATED NP_173345: unknown protein [Arabidopsis thaliana]	AGGCAAACAGATTGAACCTACTTTAACTGGCTCAGGCCCTGGTTGAACTGGAAAATAAGG	8.5	7.9	8.4	7.7	6.9	6.7	1.1	5.1e-05	0.01
MICRO.1751.C37	MICRO.1751.C37_493	Q41448	20.1.07.06	stress.biotic.PR-proteins.proteinase inhibitors	NOT VALIDATED Q41448: Aspartic protease inhibitor 7 precursor (Cathepsin D inhibitor p749)	TGGTTACAACTTATTGTATTGCCCTATTACTCCTATTCTTTGTCCATTTTGTCGTGACGA	13.4	14.3	12.8	15.9	15.8	15.8	-2.3	5e-05	0.01
MICRO.2207.C1	MICRO.2207.C1_1289	NP_173786	26.07	misc.oxidases - copper, flavone etc.	NOT VALIDATED NP_173786: oxidoreductase/ zinc ion binding [Arabidopsis thaliana]	AGCCTATTATGGCATGTGGCTGATCAAAACAGCATGTATGTTGATCATGTTGGACACAGA	10	10.7	8.8	11.9	11.9	12	-2.1	5.3e-05	0.01
MICRO.4051.C1	MICRO.4051.C1_1038	NP_191035	35.2	not assigned.unknown	NOT VALIDATED NP_191035: unknown protein [Arabidopsis thaliana]	CTGAAGTGACTTCTGTTTCCCAAGCGACTAATCCAATGTCATTGCATTCCTGGATGTATC	8.5	8.2	8.2	7.5	7	7.2	1.1	5.2e-05	0.01
MICRO.4095.C2	MICRO.4095.C2_711	NP_195217	27.1.2	RNA.processing.RNA helicase	NOT VALIDATED NP_195217: ATP binding / ATP-dependent helicase/ helicase/ nucleic acid binding [Arabidopsis thaliana]	TACACAATCCCTACATTCTAACCTTTGCTGAGTGGGAGAAAACAAAGATGACATTATCCC	8.6	8.7	8.5	8	6.8	7.4	1.2	5.3e-05	0.01
MICRO.6225.C1	MICRO.6225.C1_749	NP_567775	17.2.3	hormone metabolism.auxin.induced-regulated-responsive-activated	NOT VALIDATED NP_567775: unknown protein [Arabidopsis thaliana]	AGTGAAGCTAACTGGTCTGATTGGAACACTCTTACTAGTCGAATCTCCGCGATTTTCGCT	15.9	15.3	15.6	13.7	13	13.8	2.1	5.1e-05	0.01
MICRO.6874.C1	MICRO.6874.C1_1332	AAD01509	28.1	DNA.synthesis/chromatin structure	NOT VALIDATED AAD01509: CAO [Arabidopsis thaliana]	GTACTTCCAAGGTTGTCTAACAGATTGAGGATAATTTTCTATTTAGTGATCCAAATCTGG	8.3	8.3	7.9	10.1	8.9	10.1	-1.6	4.9e-05	0.01
MICRO.948.C1	MICRO.948.C1_1295	ABE78923	35.1	not assigned.no ontology	NOT VALIDATED ABE78923: Cycloeucalenol cycloisomerase , putative [Medicago truncatula]	TAACTTGTACTCTTTCTGAACACTATGTTTTATTAGTAGCTTCTATGAAACTGGTGCCTC	11	12	10.8	12.9	13	12.4	-1.5	5.2e-05	0.01
STMHO66TV	STMHO66TV_637	NA	35.2	not assigned.unknown	NOT VALIDATED NA: NA	ACAGGTTGGAGAACATTAAAATGCTCTCCTTTTGCTATCCAAACTTGATTTTACAATCTC	7.7	8.1	7.9	6.8	6.7	7.2	1	5.1e-05	0.01
TBSK03427FF07.t3m.scf	TBSK03427FF07.t3m.scf_349	NA	35.2	not assigned.unknown	NOT VALIDATED NA: NA	ATAAAGTTCTCAACGTTCTTTCTTTCCCTTCCAACTAAGTCATGTGTAACGAAACTGTTT	8.4	9.4	7.6	10.6	11.2	10.7	-2.4	4.9e-05	0.01
030C09AF.esd	030C09AF.esd_248	AAA66198	33.1	development.storage proteins	NOT VALIDATED AAA66198: patatin precursor	TCAGAGTTTGATAAAACCATATACAGGCAGAAAGAGGCCAGCTTAATGGGGTCCTCTACG	11.8	13.2	10.1	14.6	14.7	14.5	-2.9	7e-05	0.011
030H05AF.esd	030H05AF.esd_497	CAA64766	17.7.1.2	hormone metabolism.jasmonate.synthesis-degradation.lipoxygenase	NOT VALIDATED CAA64766: lipoxygenase [Solanum tuberosum]	TTGAAAAAACCAGATTATACAGAGGAAATGGCTGACAACATATTGATAAACAGATCAGGC	9.9	10.4	10	12	12.3	11.5	-1.8	6.4e-05	0.011
157A08AF.esd	157A08AF.esd_542	AAM63647	35.1	not assigned.no ontology	NOT VALIDATED AAM63647: unknown [Arabidopsis thaliana]	CTGAGTGATCGACGTATCATATGTGTATCTCGGATCAAACACAGTATCTGGACTGTAGAT	7.8	8.5	7.7	7	6.8	7	1.1	6.6e-05	0.011
ACDA02362E10.T3m.scf	ACDA02362E10.T3m.scf_94	Q00652	20.1.07.06	stress.biotic.PR-proteins.proteinase inhibitors	NOT VALIDATED Q00652: Cysteine protease inhibitor 9 precursor (PKIX) (pT1)	AGGTCAGAGGTACATATATTAAGCAATACCTACTCATCAGGGGTCCAGGAGCCGTATACT	8.9	9.3	8.3	10.7	10.4	11	-1.9	5.6e-05	0.011
bf_arrayxxx_0088d12.t3m.scf	bf_arrayxxx_0088d12.t3m.scf_219	NA	20.2.2	stress.abiotic.cold	NOT VALIDATED NA: NA	ATCCTCTGTTGTTGAGCGTGAACCACGAATTGGGATCATTAATTGACAGTCTTGCTTGAT	13.2	13.7	13.2	14.4	14.4	14.3	-1	7.1e-05	0.011
bf_cswbxxxx_0006f05.t3m.scf	bf_cswbxxxx_0006f05.t3m.scf_82	NA	35.2	not assigned.unknown	NOT VALIDATED NA: NA	TGCACCGCACGTACCAGACCTTTATCTTACTGATCAAGGGTTCGACGTGTGATGCATACC	11.1	11	11.4	9.8	9.8	10.5	1.1	5.7e-05	0.011
bf_ivrootxx_0013h01.t3m.scf	bf_ivrootxx_0013h01.t3m.scf_390	NA	35.2	not assigned.unknown	NOT VALIDATED NA: NA	AGGGAGTATGATTGTGCTATTTCCAATTACTTAAGCTGTTGTTAGTAAGTGTAGTTAGTC	7.5	7.1	7.4	8.2	7.9	8.2	-0.8	6.4e-05	0.011
bf_ivrootxx_0028a01.t3m.scf	bf_ivrootxx_0028a01.t3m.scf_537	NP_001046547	1.01.05.03	PS.lightreaction.other electron carrier (ox/red).ferredoxin reductase	NOT VALIDATED NP_001046547: Os02g0277600 [Oryza sativa (japonica cultivar-group)]	CGGTTAGCTCTGTTTTGAGCTCTTCTGGTCATGGAACCTGTATACTGACATGGTGTAGTT	8.5	7.5	8.7	7	6.5	6.5	1.6	6.3e-05	0.011
bf_ivrootxx_0051E01.t3m.scf	bf_ivrootxx_0051E01.t3m.scf_368	NA	35.2	not assigned.unknown	NOT VALIDATED NA: NA	AGTTAGTGATGTCCCTGTTTGTTTGCCTTGACAATTATGTTTTTGAGTAGCTCTTCAATG	8.5	8.7	8.3	9.3	9.9	9.4	-1	6.6e-05	0.011
BF_LBCHXXXX_0020B06_T3M.SCF	BF_LBCHXXXX_0020B06_T3M.SCF_525	NA	35.2	not assigned.unknown	NOT VALIDATED NA: NA	TACCTGCAGTAGTAGTAGCTTCAGAGGCCCTACGTGTGTGTTCATAACTGAAAAAGGGAT	6.6	6.4	6.6	7.3	7.3	7.7	-0.9	6.4e-05	0.011
BF_LBCHXXXX_0051B07_T3M.SCF	BF_LBCHXXXX_0051B07_T3M.SCF_505	NA	35.2	not assigned.unknown	NOT VALIDATED NA: NA	TCATAGCAATTTTACACTGCAAATTGCCTGCTCTAATCACTAGCTTCATGTACTGTTTCT	7.5	8.3	7.8	9	9.5	8.9	-1.2	6.1e-05	0.011
bf_mxflxxxx_0022g03.t3m.scf	bf_mxflxxxx_0022g03.t3m.scf_486	NA	35.2	not assigned.unknown	NOT VALIDATED NA: NA	GTTGGGCCTAAGTCCTTTATTTGCAATCATTATTATTTTGTTAGAATTTTGGACAGGTGC	6.4	6.4	6.2	7.2	7	7.9	-1.1	5.5e-05	0.011
bf_mxflxxxx_0058h06.t3m.scf	bf_mxflxxxx_0058h06.t3m.scf_446	CAB65696	35.2	not assigned.unknown	NOT VALIDATED CAB65696: putative ferredoxin [Solanum lycopersicum var. cerasiforme]	CACGTCAACAGGTAAAAACAGTTAGTATATTGCTTTACTCCCCGTCTAGTGTCATCATGA	12.8	12.3	13.1	10.8	11.7	11.4	1.4	5.6e-05	0.011
bf_mxlfxxxx_0048a10.t3m.scf	bf_mxlfxxxx_0048a10.t3m.scf_238	AAM12787	35.2	not assigned.unknown	NOT VALIDATED AAM12787: putative anthocyanidine rhamnosyl-transferase [Capsicum annuum]	TGAAATGGGAAGAAAAACTTGAGTTTAAACGAACCTTTAATTAGTTGTAATTTCTGGTTA	7.4	8.3	7	8.6	9.5	9.6	-1.7	5.6e-05	0.011
bf_suspxxxx_0011h04.t3m.scf	bf_suspxxxx_0011h04.t3m.scf_76	NA	35.2	not assigned.unknown	NOT VALIDATED NA: NA	AGTCGTTCTTTAGTCCGAGTTAGCCTTTGATTATGAACAATCGGATCAATGAAACCGACG	8.1	8	7.5	6.9	6.8	6.7	1	6.1e-05	0.011
bf_swstxxxx_0062e10.t3m.scf	bf_swstxxxx_0062e10.t3m.scf_514	ABE89772	35.2	not assigned.unknown	NOT VALIDATED ABE89772: Protein of unknown function DUF589 [Medicago truncatula]	GCTAGCTTGTTGATAATGGGTATGTAAAGCTTTCAATTTGTTCTTCCAAAAGAGTAATGG	8.2	8.8	8.3	9.6	9.7	9.4	-1.1	6.2e-05	0.011
BF_TUBSXXXX_0062E10_T3M.SCF	BF_TUBSXXXX_0062E10_T3M.SCF_657	NA	35.2	not assigned.unknown	NOT VALIDATED NA: NA	TTGACTGCTTAAAGCAAATGGGGGGATTGAACCCGCACGACAGGCCTTAATATAGATAGT	6.7	6.8	6.6	7.5	7.5	8	-0.9	5.8e-05	0.011
MICRO.10745.C2	MICRO.10745.C2_437	AAD50631	30.11	signalling.light	NOT VALIDATED AAD50631: phytochrome B2 [Lycopersicon esculentum]	TAGGACTAATTTTTAACACCATAGTGTCACGGACTTAGAGATTCGACTGGCAAAGTATAA	8.8	8.9	8.9	8.3	7.6	7.3	1.1	5.8e-05	0.011
MICRO.1129.C2	MICRO.1129.C2_259	NA	21.02.1.1	redox.ascorbate and glutathione.ascorbate.GME	NOT VALIDATED NA: NA	ATGTAAGATTTCATTGCAAAGTTATTATTATCTCTTCATATAGTAATGAGATTGAAATTT	7.2	8	7.1	9.2	8.7	9	-1.5	7e-05	0.011
MICRO.11594.C1	MICRO.11594.C1_539	AAT11172	11.9.4.02	lipid metabolism.lipid degradation.beta-oxidation.acyl CoA DH	NOT VALIDATED AAT11172: putative short-chain acyl-CoA oxidase [Tropaeolum majus]	CTGCTGAATAATGTTCTGTTTAGGCAATTGTAAATCTACAATGCTTTTACCCAAAGGAAG	10.6	9.9	10.5	9.2	8.3	9.4	1.3	5.4e-05	0.011
MICRO.11737.C1	MICRO.11737.C1_51	NP_565371	35.2	not assigned.unknown	NOT VALIDATED NP_565371: unknown protein [Arabidopsis thaliana]	TATTTATTCTTCCCCGAGTACAAAGGTGAAAGTAAGAAGCTCTTCTTGGGGCCGCGAAGA	9.7	9.1	9.3	8.5	8.2	8.6	1	5.7e-05	0.011
MICRO.13124.C1	MICRO.13124.C1_390	CAA11131	35.2	not assigned.unknown	NOT VALIDATED CAA11131: O-methyltransferase [Prunus dulcis]	ACAGTAGAAGCCAATACTCTATCTTATGTTCCCCGGTTTGTGCATTATTTTGGAAAGGAA	11.5	11.2	11.8	9.9	8.7	10	2	5.5e-05	0.011
MICRO.14396.C2	MICRO.14396.C2_1336	CAA10857	27.3.67	RNA.regulation of transcription.putative DNA-binding protein	NOT VALIDATED CAA10857: AT-hook protein 1 [Arabidopsis thaliana]	GTTTGCATTTTTGCCCTGTACTTTTACTTGTGTGTTTATATATCATGGACATGAGTTTGG	6.1	5.9	6.3	6.9	7.5	6.9	-1	6.6e-05	0.011
MICRO.1450.C2	MICRO.1450.C2_456	NP_849717	35.2	not assigned.unknown	NOT VALIDATED NP_849717: unknown protein [Arabidopsis thaliana]	TTCCAAGCCAAGTTGCCAGGTTTTCGAAGAAAATTACAGCACTTCCACAGACACCGGAAA	7.2	6.7	7	7.7	7.7	8.1	-0.9	6.9e-05	0.011
MICRO.1520.C30	MICRO.1520.C30_1102	ABC55694	33.1	development.storage proteins	NOT VALIDATED ABC55694: patatin protein 07 [Solanum tuberosum]	CGTATGTAATGTGTGTGGATTATGTAACCTTCTGGTTGTGGTTTAATGTAGTTGGAATAT	11.7	13.6	10.5	14.9	15.2	14.5	-2.9	6.9e-05	0.011
MICRO.15235.C2	MICRO.15235.C2_100	NP_001049703	35.2	not assigned.unknown	NOT VALIDATED NP_001049703: Os03g0274700 [Oryza sativa (japonica cultivar-group)]	CCACCAAACGATGCAACATCAGCATCAACAGCAACAACATCAGCAGATAAAGTCGGAACA	8.7	8.2	8.5	7.3	6.9	7	1.4	5.5e-05	0.011
MICRO.15711.C2	MICRO.15711.C2_482	ABO80288	35.1	not assigned.no ontology	NOT VALIDATED ABO80288: Cytidylyltransferase [Medicago truncatula]	GACTTGTAACTTCGGCGAAGCTGCTCTTTTTTCAAGATAGCTCGTCCTGTATTTGTATTT	8.4	8.3	8.1	9.6	9.8	9	-1.2	5.7e-05	0.011
MICRO.16250.C1	MICRO.16250.C1_807	NP_850375	29.2.2	protein.synthesis.misc ribosomal protein	NOT VALIDATED NP_850375: RNA binding / structural constituent of ribosome [Arabidopsis thaliana]	CCAGCCCTGCTTGAAACCCCTTTTAACACAAAATCACTACTGTTGCTTCACATTTTTATT	8.8	8.8	9.5	8.3	7.5	7.1	1.4	6.8e-05	0.011
MICRO.2435.C3	MICRO.2435.C3_611	NP_196225	29.2.3	protein.synthesis.initiation	NOT VALIDATED NP_196225: oxidoreductase [Arabidopsis thaliana]	TGTGACTGAATGTGTTGTTATTATTATTGTTGTATTCTATGTTCCTCAGCGTGTTCTAGC	8	9.6	8.5	10.4	11.1	11.1	-2.2	5.6e-05	0.011
MICRO.2694.C1	MICRO.2694.C1_447	P31583	30.5	signalling.G-proteins	NOT VALIDATED P31583: Ras-related protein RHN1	GATCTAGAAGATCGAAGGAACGTTCCTGCAGAAGTAAGTTGTACTTTTTGGAGGCACGCT	8.2	7.5	8.2	7	6.6	6.6	1.2	6.5e-05	0.011
MICRO.273.C1	MICRO.273.C1_339	ABN08827	29.5.11.04.03.02	protein.degradation.ubiquitin.E3.SCF.FBOX	NOT VALIDATED ABN08827: Cyclin-like F-box [Medicago truncatula]	AATTTGTGATTACCAACGGACTCTCTAAGCAACTCTGTGTGGGGAGGTTTCAGCAGCTTT	8.8	8	8.7	7.4	7.6	7	1.2	7e-05	0.011
MICRO.2914.C1	MICRO.2914.C1_1318	ZP_01142625	35.2	not assigned.unknown	NOT VALIDATED ZP_01142625: hypothetical protein GuraDRAFT_1187 [Geobacter uraniumreducens Rf4]	GAAATAGCTTGAAAGCCGATAAAGATGTGGTGGCGCTGGAGAAGGAAATGTGGAGTAAAT	8	8.9	7.5	9.5	9.4	9.5	-1.3	6.8e-05	0.011
MICRO.2940.C1	MICRO.2940.C1_495	AAG50930	35.2	not assigned.unknown	NOT VALIDATED AAG50930: unknown protein [Arabidopsis thaliana]	AAAGCCCAGAAGGCATAAGAGTATCAAGTTTTGTTTATTAGCATTAGTGTAAGTGTCTTC	8.7	9.4	7.8	10.6	10.5	10.6	-1.9	5.9e-05	0.011
MICRO.295.C2	MICRO.295.C2_817	NP_175688	35.1	not assigned.no ontology	NOT VALIDATED NP_175688: oxidoreductase, acting on paired donors, with incorporation or reduction of molecular oxygen, 2-oxoglutarate as one donor, and incorporation of one atom each of oxygen into both donors [Arabidopsis thaliana]	TCAATTATTTTCCTTTCCCAAATCAAGATTTTGCTGTGAAGGTCCCAAAAGAATTAGTGG	6.6	6.9	6.9	8.8	10	8.4	-2.3	7e-05	0.011
MICRO.3072.C1	MICRO.3072.C1_346	Q43843	1.03.11	PS.calvin cyle.RPE	NOT VALIDATED Q43843: Ribulose-phosphate 3-epimerase, chloroplast precursor (Pentose-5-phosphate 3-epimerase) (PPE) (RPE) (R5P3E)	AATAACCCACCTCTCGGATGTTGTGTAATACTATATGTTGTATAACTTTTCTTGCATAGG	11.3	11.3	10.8	12.1	12.1	12	-0.9	5.8e-05	0.011
MICRO.3653.C1	MICRO.3653.C1_680	NP_001061686	35.2	not assigned.unknown	NOT VALIDATED NP_001061686: Os08g0378800 [Oryza sativa (japonica cultivar-group)]	GTGAACATCTTTCAGACCAAGAGCATTAAACAGTATCAATTGGCAAATCTAACCATGGAA	9.1	9	9.7	8.3	7.8	8.5	1.1	6.4e-05	0.011
MICRO.4781.C1	MICRO.4781.C1_1344	NP_027420	27.3.99	RNA.regulation of transcription.unclassified	NOT VALIDATED NP_027420: nucleic acid binding [Arabidopsis thaliana]	TTAGAGTTGCTGGGGGGCTAGGTTTGCCCAAAAGGGTCAAGAAGACTGTATGTAACTTTT	11.2	10.3	10.7	9.6	9.5	9.6	1.1	6.7e-05	0.011
MICRO.6303.C1	MICRO.6303.C1_1235	P93111	19.2	tetrapyrrole synthesis.glu-tRNA reductase	NOT VALIDATED P93111: Glutamyl-tRNA reductase 1, chloroplast precursor (GluTR)	ATTACTTGAAGTTATATCCTTGTAATGAGTGATTCATGGGAGAGATCCATATACTCCTTC	10.9	11.4	10.4	12.2	11.9	12.9	-1.4	6.2e-05	0.011
MICRO.697.C2	MICRO.697.C2_1	AAB05376	26.1	misc.cytochrome P450	NOT VALIDATED AAB05376: putative cytochrome P-450 [Nicotiana plumbaginifolia]	AGCCAGGAAAGAAGTTCTTGAAGTCATTGGAAAAAGATGAGCCTAAGTTTGATCAACTCA	6.7	6.9	6.7	10.4	10.3	9.7	-3.4	6.8e-05	0.011
MICRO.8157.C1	MICRO.8157.C1_777	AAO00890	17.4.2	hormone metabolism.cytokinin.signal transduction	NOT VALIDATED AAO00890: histidine kinase-like protein [Arabidopsis thaliana]	TGCGTATGCATATTACAGCTATTCTCTGTGAAGTCCTGACAATGGAAGCAGATTGCTACT	7.5	7.6	7.3	6.7	6.6	6.9	0.7	7.1e-05	0.011
MICRO.8287.C1	MICRO.8287.C1_791	NP_565493	35.2	not assigned.unknown	NOT VALIDATED NP_565493: unknown protein [Arabidopsis thaliana]	TTGGTTTGAAGTCAAGTAGTTGATGACTGCTCTCGAGTCATTTGCAGGCACTCAGTGTAC	8.1	8.3	8.4	7.4	6.8	7.5	1	7.1e-05	0.011
MICRO.8346.C1	MICRO.8346.C1_446	ABE77860	35.1	not assigned.no ontology	NOT VALIDATED ABE77860: SOUL heme-binding protein; Bacterial regulatory factor, effector [Medicago truncatula]	CATTGGCTGAGTACTTGTTTGGTAAGAACACGAAGCAAGGAGAGTATGGCAATGACGACA	8.4	8.2	8.9	7.8	6.7	6.6	1.4	5.6e-05	0.011
MICRO.9333.C2	MICRO.9333.C2_1123	NP_192705	35.1	not assigned.no ontology	NOT VALIDATED NP_192705: oxidoreductase [Arabidopsis thaliana]	ACTAGTTGGTGTTTAGCTAGCTTCCTTGTGAAACTCTGAACGCTATCTGTTGTTGTAACT	12.7	11	12.6	9.9	9.3	9.8	2.5	6.2e-05	0.011
MICRO.9683.C1	MICRO.9683.C1_1127	NP_849599	13.2.3.2	amino acid metabolism.degradation.aspartate family.threonine	NOT VALIDATED NP_849599: hydroxyacylglutathione hydrolase [Arabidopsis thaliana]	TGTGGAGAGTCCAATTGTTGCCTTGAACAGTCTTGATTCAACCTGGTTAAACTAGACCCT	11.8	10.4	12.1	9.7	9.7	9.8	1.7	7.2e-05	0.011
MICRO.9744.C2	MICRO.9744.C2_311	NP_564655	35.2	not assigned.unknown	NOT VALIDATED NP_564655: RNA binding [Arabidopsis thaliana]	GAAACAAGAATTGCAGCAGCTGCTATGTTGCGTCAAAATCTAGGGCTTCCTTCTGCTCAT	8.9	8	8.7	7.8	6.8	7.1	1.4	6.3e-05	0.011
POCAF10TP	POCAF10TP_941	ABC01914	35.2	not assigned.unknown	NOT VALIDATED ABC01914: unknown [Solanum tuberosum]	AAACAAAAAGCAGACCGGTTTAAGACTTTGCTGGGATTGGGAGAATCTAGTTTCGTCATC	9.2	9	8.9	8.4	7.9	7.8	1	6.9e-05	0.011
STMDF92TV	STMDF92TV_84	AAG22605	17.1.1	hormone metabolism.abscisic acid.synthesis-degradation	NOT VALIDATED AAG22605: aldehyde oxidase [Lycopersicon esculentum]	ATGGTCTCAAATAAGCACTCGGGATATACAAGATTCCCAGACTATTGACCACCATACCCC	6.8	6.5	7.2	8.3	8	8.6	-1.4	5.8e-05	0.011
STMHW60TV	STMHW60TV_578	BAD98961	17.5.1	hormone metabolism.ethylene.synthesis-degradation	NOT VALIDATED BAD98961: 2-oxoglutarate-dependent dioxygenase [Solanum lycopersicum]	GGATGACACAAATCACAGTAAGCTGTTAGTAGTAGTAGGGTGTTGTCTTGCTTATCCTTC	7.4	8	8.7	6.7	6.4	6.6	1.4	5.6e-05	0.011
TBSK01458FB06.t3m.scf	TBSK01458FB06.t3m.scf_145	NA	35.2	not assigned.unknown	NOT VALIDATED NA: NA	CTTTGTCGTGTCAGGCAAATAAACGGAGCCGCGAGTGGCGGAGTTAATTCCGTGGGCATT	8.6	9.5	8.5	10.6	10.9	11.6	-2.2	6.5e-05	0.011
TBSK03545FH05.t3m.scf	TBSK03545FH05.t3m.scf_143	NA	35.2	not assigned.unknown	NOT VALIDATED NA: NA	GCCGGTACTTGACAGCAAATGGTAAACAAACTGAACTCCTAATTCGAGTTATCGCGATTA	11.8	12.7	11.7	14.1	14.6	14.2	-2.2	5.5e-05	0.011
TBSK04956FE12.t3m.scf	TBSK04956FE12.t3m.scf_106	NA	35.2	not assigned.unknown	NOT VALIDATED NA: NA	CCCTACTGCTAGTCAAGGAAGGTGACACCGGTCTTGATTGACCTGAGTACGGTGGTACTC	14	13.9	13.7	13.2	13.1	13	0.8	5.8e-05	0.011
bf_lbchxxxx_0061h08.t3m.scf	bf_lbchxxxx_0061h08.t3m.scf_459	O22466	27.3.62	RNA.regulation of transcription.Nucleosome/chromatin assembly factor group	NOT VALIDATED O22466: WD-40 repeat protein MSI1	TAACATCAATTAGGAGAGCCTAAAAAATATATGCTTGTTCGGTTGTTCCATTTGCCCCTC	9.1	8.4	8.7	8.1	7.4	6.9	1.3	8.2e-05	0.012
BF_TUBSXXXX_0051A01_T3M.SCF	BF_TUBSXXXX_0051A01_T3M.SCF_307	NA	29.5	protein.degradation	NOT VALIDATED NA: NA	GCTAACTTTAGCCCCTTTCTCTATCTATATAATTATTATTCCTCTCCTCGATGCACCGAA	8.7	8.4	8.9	7.7	7.9	7.8	0.9	8e-05	0.012
cSTS6F5TH	cSTS6F5TH_535	NP_567895	1.02.05	PS.photorespiration.serine hydroxymethyltransferase	NOT VALIDATED NP_567895: glycine hydroxymethyltransferase [Arabidopsis thaliana]	GATATTATGGTGGAAACGAGTACATTGATGAGTTAGAAATACTCTGTCAAGAGAGGGCTT	8.2	8.6	7.9	7.2	6.7	7.3	1.1	7.4e-05	0.012
MICRO.14491.C1	MICRO.14491.C1_636	BAC42826	35.2	not assigned.unknown	NOT VALIDATED BAC42826: unknown protein [Arabidopsis thaliana]	TAGTATTCACATTGCAAATGGTCATAATTTGCTCAAATGGCCATTTGGTTCTCTTCTTAG	8.5	9	7.6	10.4	9.9	10.3	-1.8	8e-05	0.012
MICRO.17724.C1	MICRO.17724.C1_553	NP_178239	35.2	not assigned.unknown	NOT VALIDATED NP_178239: unknown protein [Arabidopsis thaliana]	TCCCACTTATATATGGGATTGACCCTAACTTTTCTTGTTGCATATGTTTTAGTCATTCGT	6.7	6.6	7	7.7	7.5	8.1	-1.1	7.3e-05	0.012
MICRO.2022.C7	MICRO.2022.C7_250	NP_001030955	35.2	not assigned.unknown	NOT VALIDATED NP_001030955: nucleic acid binding [Arabidopsis thaliana]	CATGGAGAAAGAGCTTGTTGAGTGTGAAGGAACTATTCGTGACTGAAGAAACATAAGTTT	8.2	7.6	8.3	7.1	6.9	6.9	1.1	8.1e-05	0.012
MICRO.3788.C5	MICRO.3788.C5_92	Q9ZSK5	16.8.3	secondary metabolism.flavonoids.dihydroflavonols	NOT VALIDATED Q9ZSK5: Zeatin O-glucosyltransferase (Trans-zeatin O-beta-D-glucosyltransferase)	AGGTTTATATGGGTGCTGAGAGATGTCCGATAGAGGAGATATCTTTAAAGGGGAAGATAG	7.9	8.6	7.5	9.6	9.6	9.4	-1.5	8.2e-05	0.012
MICRO.4363.C2	MICRO.4363.C2_789	P46253	11.1.15	lipid metabolism.FA synthesis and FA elongation.ACP desaturase	NOT VALIDATED P46253: Acyl-[acyl-carrier-protein] desaturase, chloroplast precursor (Stearoyl-ACP desaturase)	GCAATTGTGTTTAGGCCATAGGGAAAAACATAGTTCTTAGCAATAAAGATGAACCTTTTG	14.1	10.7	15.7	9	8	8.7	4.9	7.3e-05	0.012
MICRO.5958.C1	MICRO.5958.C1_1177	ABE87434	11.8	lipid metabolism.'exotics' (steroids, squalene etc)	NOT VALIDATED ABE87434: Sterol desaturase [Medicago truncatula]	ATGTGAATGTACGTGTTGTGTTTCTCTATCAAGCACTATATATATATATGGAGTGCTTGC	6.8	7.4	7.1	12.7	11.9	10.1	-4.5	7.8e-05	0.012
MICRO.5999.C1	MICRO.5999.C1_527	NA	35.2	not assigned.unknown	NOT VALIDATED NA: NA	ACAGTTGCGGACAATGTTCAAGAGCAGTTATCTTCAGAATTCTCCCTCCACATTGATGCA	7.7	7.9	8	6.2	7.3	6.1	1.3	7.7e-05	0.012
MICRO.896.C1	MICRO.896.C1_369	NP_566877	27.3.11	RNA.regulation of transcription.C2H2 zinc finger family	NOT VALIDATED NP_566877: nucleic acid binding / transcription factor/ zinc ion binding [Arabidopsis thaliana]	TAATTCAAATCCAGATGTTTCTTGTGCTAATAAGAGGAAGAGAAATCTCCCCGGAAATCC	7.9	7.6	8.4	6.8	6.7	6.4	1.3	8.2e-05	0.012
MICRO.942.C1	MICRO.942.C1_302	ABB29919	27.1.1	RNA.processing.splicing	NOT VALIDATED ABB29919: unknown [Solanum tuberosum]	GGATGGTAGCCTATGTTGCTGTTGTTCACACTGATATTTGGTCACAGGAAGAGTTGTAGA	8.2	7.8	8.5	7.1	7	6.5	1.3	7.8e-05	0.012
MICRO.9584.C1	MICRO.9584.C1_1144	NA	35.2	not assigned.unknown	NOT VALIDATED NA: NA	GCTAGTGCACAAACAACGCTGAAATTTTGAAGTCAGAAACATAATAGTGTTACCCTTTTT	7.4	7.8	7.8	6.3	7	6.8	0.9	7.5e-05	0.012
POCA906TP	POCA906TP_711	AAX26869	35.1	not assigned.no ontology	NOT VALIDATED AAX26869: unknown [Schistosoma japonicum]	GTGAGCCTGTGCGGATCGGCCGTCCGTGCATATCTTGCTGGTAGTAGCGGATAATCAGAT	13.3	12.5	13.5	11.4	11.5	11.7	1.6	7.3e-05	0.012
089G03AF.esd	089G03AF.esd_594	P38415	17.7.1.2	hormone metabolism.jasmonate.synthesis-degradation.lipoxygenase	NOT VALIDATED P38415: Lipoxygenase A	CACACAGAGCTAAATCGATTCGTTGTACCACCATCATATTGGATAGCTTTCTGCACTTCA	11.5	11.7	11.2	13.4	13.2	13.4	-1.9	9e-05	0.013
ACDA03143F11.T3m.scf	ACDA03143F11.T3m.scf_420	ABA40457	33.99	development.unspecified	NOT VALIDATED ABA40457: TSJT1-like protein [Solanum tuberosum]	GCCACCCAATATACCTTCCTGGATCAAGGTCATCAAAGAACTTGGAAGGGCAATTTGCTT	8.3	7.7	7.9	6.6	7	7	1.1	8.3e-05	0.013
bf_acdcxxxx_0059h01.t3m.scf	bf_acdcxxxx_0059h01.t3m.scf_86	NA	35.2	not assigned.unknown	NOT VALIDATED NA: NA	CGGATGCTATTTTCTCAGTACGTGACGACAGTGGTCGAATCCAAGATCATCACTGACCGG	15	14.4	14.3	13.2	13.3	13.4	1.3	0.0001	0.013
bf_arrayxxx_0052h07.t7m.scf	bf_arrayxxx_0052h07.t7m.scf_162	BAA04150	20.1.07.06	stress.biotic.PR-proteins.proteinase inhibitors	NOT VALIDATED BAA04150: proteinase inhibitor [Solanum tuberosum]	TACAATGAGGTGCCCAGTTTCCTCCGATGATCAATGATGATCTAAAACTTGGTGTAGTTC	7.2	6.9	7	7.9	7.9	8.5	-1.1	8.6e-05	0.013
bf_lbchxxxx_0061f09.t3m.scf	bf_lbchxxxx_0061f09.t3m.scf_371	NA	35.2	not assigned.unknown	NOT VALIDATED NA: NA	CTACATCCCTTTTTATGAATATCACGCACTTGGAGGCTCCAAAATATCTCAACAAGAAAA	6.5	7	6.7	7.5	7.4	7.8	-0.8	8.6e-05	0.013
bf_mxflxxxx_0073g05.t3m.scf	bf_mxflxxxx_0073g05.t3m.scf_337	NA	35.2	not assigned.unknown	NOT VALIDATED NA: NA	TGATACATGATACAAACCGTTAGTCATCTTGTTACATTTGATGATCTCAGTCTTCAATGG	6.5	6.6	6.6	7.2	8.1	7.3	-1	9.6e-05	0.013
bf_mxflxxxx_0074f10.t3m.scf	bf_mxflxxxx_0074f10.t3m.scf_183	NP_179283	35.2	not assigned.unknown	NOT VALIDATED NP_179283: AMS (ABORTED MICROSPORES); DNA binding / transcription factor [Arabidopsis thaliana]	AAATGGTTCAAGCTGATCATGTGAGGGACACCTTGCTAGAGCTGACAAGAAACCCTAGTA	7.4	7.5	7.3	6.3	6.6	6.5	0.9	8.7e-05	0.013
bf_mxflxxxx_0075e12.t3m.scf	bf_mxflxxxx_0075e12.t3m.scf_432	AAU93581	35.2	not assigned.unknown	NOT VALIDATED AAU93581: Putative F-box protein, identical [Solanum demissum]	GTGTTACGGATGCAACAAAAGACAAAAGGCTGAAAGAGCTCAGATCAAGAAAACCGAGTA	7.8	7.5	7.9	6.7	6.6	6.7	1.1	9.1e-05	0.013
bf_mxlfxxxx_0009d07.t3m.scf	bf_mxlfxxxx_0009d07.t3m.scf_312	NA	35.2	not assigned.unknown	NOT VALIDATED NA: NA	ATACATGACACAGCTAAATTATTTTACTTGCCATGACAAGTCCTCTTTGACTCTTATGTG	9	8.4	9.4	7.8	7.4	8	1.2	8.4e-05	0.013
bf_mxlfxxxx_0020g09.t3m.scf	bf_mxlfxxxx_0020g09.t3m.scf_451	NP_974571	35.2	not assigned.unknown	NOT VALIDATED NP_974571: unknown protein [Arabidopsis thaliana]	CTACTTGGGTACCTTTTATTGTGTCATTTGTGTTTTTGGGAGTGCCTTATTGGGAGTTAG	7.3	6.7	6.9	8.1	8.1	8.6	-1.2	8.5e-05	0.013
bf_mxlfxxxx_0025a11.t3m.scf	bf_mxlfxxxx_0025a11.t3m.scf_328	ABE82976	26.3	misc. other Ferredoxins and Rieske domain	NOT VALIDATED ABE82976: 2Fe-2S ferredoxin, iron-sulfur binding site [Medicago truncatula]	GTGGAGAGAGGTTATGCATTACTATGTGCAGCTTATCCAAGATCAGATTGCCATATTAGA	7.4	6.6	7.1	8.9	7.7	8.8	-1.4	9.6e-05	0.013
bf_swstxxxx_0040b03.t3m.scf	bf_swstxxxx_0040b03.t3m.scf_348	NA	35.2	not assigned.unknown	NOT VALIDATED NA: NA	AAATATATGTTTAATAATTTTGCGGTGAAGGAGAGGGAGTTGGAGATTGGATGTCCAACT	6.8	6.7	6.8	7.7	8	7.5	-0.9	0.0001	0.013
BF_TUBSXXXX_0040H01_T3M.SCF	BF_TUBSXXXX_0040H01_T3M.SCF_567	Q43710	35.2	not assigned.unknown	NOT VALIDATED Q43710: Proteinase inhibitor type-2 TR8 precursor (Proteinase inhibitor type II TR8)	ATGGAGAATATGAATGGCTAAGTGAAGGCAGAAAATGATCTCCAGAAAAAGCAATGTTGC	9.6	11.1	8.6	13	12.8	13.1	-3.2	8.7e-05	0.013
cSTE21J2TH	cSTE21J2TH_81	NA	35.2	not assigned.unknown	NOT VALIDATED NA: NA	ACAGCAACTCCAGTGAGCAGCAAGGTTCATCAGCGAGCAACCAGGCGGAAACAGCTGCAA	6.7	6.6	6.6	7.1	7.7	7.6	-0.8	9.7e-05	0.013
cSTS29N24TH	cSTS29N24TH_551	ABI97246	27.3.02	RNA.regulation of transcription.Alfin-like	NOT VALIDATED ABI97246: PHD1 [Glycine max]	TATTCAAGACCACAACCAAAAGATGAGGATGAAGATGACGAGCAAGGAGAAACACTATGT	9.6	8.5	9.5	8.5	7.4	7.8	1.3	0.0001	0.013
MICRO.10248.C1	MICRO.10248.C1_1075	AAA74120	30.5	signalling.G-proteins	NOT VALIDATED AAA74120: putative	GTTGGATTGGTAACTGCTACTGTGCTTATTTTCAGTTACACCTAAATTACATGTAAAACC	7.7	7.7	8.5	6.8	6.9	7	1.1	9.3e-05	0.013
MICRO.1027.C2	MICRO.1027.C2_292	AAG09919	27.3.24	RNA.regulation of transcription.MADS box transcription factor family	NOT VALIDATED AAG09919: MADS box protein 2 [Zea mays]	TCTCCAGTACTGGAAAACTCTATGAATATTCAAACACCAGTTTTGGCAAAGGGAAGCGGC	9.1	7.5	9.3	7.4	6.4	6.1	2.1	0.0001	0.013
MICRO.10982.C2	MICRO.10982.C2_1255	ABD28350	29.4	protein.postranslational modification	NOT VALIDATED ABD28350: Protein phosphatase 2C-like [Medicago truncatula]	AGAATGTCTAAAATTCAACAACAAGCTTACATGAACTACTAGCTGACTTTCAATTGCTGC	8.8	8.4	10.9	7.4	7.1	7	2.2	8.9e-05	0.013
MICRO.11.C2	MICRO.11.C2_1216	ABB84472	26.02	misc.UDP glucosyl and glucoronyl transferases	NOT VALIDATED ABB84472: rhamnose:beta-solanine/beta-chaconine rhamnosyltransferase [Solanum tuberosum]	AAGCAATTGGTGGATTCTTAACTCATTGTGGTTGGAACTCTATACTTGAGTCTCTAGCCG	7.8	7.6	7.5	11.6	10.8	9.9	-3.1	8.4e-05	0.013
MICRO.11617.C3	MICRO.11617.C3_26	AAR00328	35.2	not assigned.unknown	NOT VALIDATED AAR00328: rapid alkalinization factor 4 [Solanum chacoense]	GAAGAGAATTGTACAAGACGACGAGGATGATGATGCTCCTTGTGCTGCTTGTAACCGTAA	8.1	8.6	8.3	9.6	9.5	9.4	-1.2	9.2e-05	0.013
MICRO.11631.C1	MICRO.11631.C1_917	ABE90729	31.1	cell.organisation	NOT VALIDATED ABE90729: Myosin II heavy chain-like [Medicago truncatula]	TCTGCAGCTCAAGTGATATGTTATTGGTTCAGGTTTGTCAATATTCTAGTAAATGAGATC	8.2	8.5	7.8	9.3	9.2	9.3	-1.1	9e-05	0.013
MICRO.12897.C1	MICRO.12897.C1_1176	AAG60115	35.1	not assigned.no ontology	NOT VALIDATED AAG60115: hypothetical protein [Arabidopsis thaliana]	AGATTCATATAGCCAACTCCTAACTTGTTCGATATTGAGGCGTAGTAGTTGTTGTAATTG	6.6	6.7	6.7	7.2	7.6	8.1	-1	9.8e-05	0.013
MICRO.1520.C21	MICRO.1520.C21_1284	AAA66198	33.1	development.storage proteins	NOT VALIDATED AAA66198: patatin precursor	GTTTGACGGGATAAAATTCTCAACTAGAAATTGTCTTCTCTATGTAATTGTGTGCTTTGG	8	9.4	7.1	11	11.7	10	-2.7	0.0001	0.013
MICRO.15274.C1	MICRO.15274.C1_1100	CAD21832	35.1	not assigned.no ontology	NOT VALIDATED CAD21832: DRL1 protein [Arabidopsis thaliana]	ATTGGCCCTTCTCTAAGCAAGGGCTGATTTGCAAGCAGGATAGATCAATCTTGACTAAGT	9.8	9.3	9.8	8.6	8	8.9	1.1	8.2e-05	0.013
MICRO.15711.C1	MICRO.15711.C1_336	ABO80288	35.1	not assigned.no ontology	NOT VALIDATED ABO80288: Cytidylyltransferase [Medicago truncatula]	TCTCCAGTATGCCTCTTGTGACTTGTAACTTCCGGCGAAGCTGCTCTTTTTTCCAAGATA	9.2	9.3	8.9	10.7	10.5	9.8	-1.2	0.0001	0.013
MICRO.16174.C1	MICRO.16174.C1_673	NP_001046165	21.05	redox.periredoxins	NOT VALIDATED NP_001046165: Os02g0192700 [Oryza sativa (japonica cultivar-group)]	ATGTTAGCAGTGCAGAAGATATTCTTCAAGGCTCTTTAGAGGTTTAGTTGTGTTTTTCTT	9.5	10.5	9.4	11	11.2	11.3	-1.4	9.2e-05	0.013
MICRO.1784.C1	MICRO.1784.C1_924	AAN62354	35.2	not assigned.unknown	NOT VALIDATED AAN62354: CTV.22 [Poncirus trifoliata]	CAAGGGATAACTGATCTCAGGATTAGTTTAGGATGAGCTTATCCCATGTTTGGTTGGGAT	7.9	8.5	8.5	7.4	6.9	6.6	1.3	0.0001	0.013
MICRO.2287.C1	MICRO.2287.C1_822	ABE91717	26.16	misc.myrosinases-lectin-jacalin	NOT VALIDATED ABE91717: Protein kinase; Curculin-like (mannose-binding) lectin [Medicago truncatula]	TTAGCATCAGAATGGCAAACAAATGCCCCATCTCTATCAAGGTTGATGTCTTCAACTATG	9.7	9.5	10	9.1	9	8.8	0.8	8.6e-05	0.013
MICRO.2435.C1	MICRO.2435.C1_805	NP_196225	26.08	misc.nitrilases, *nitrile lyases, berberine bridge enzymes, reticuline oxidases, troponine reductases	NOT VALIDATED NP_196225: oxidoreductase [Arabidopsis thaliana]	AACAGCCTGGCTATTAAGTTGTACTTGTGGTTGTTTGAATAAAAGTCTTGATCATGTTAG	7.5	7.9	8.1	9.3	9.7	9.1	-1.5	9.4e-05	0.013
MICRO.2608.C15	MICRO.2608.C15_780	CAB71336	26.13	misc.acid and other phosphatases	NOT VALIDATED CAB71336: putative acid phosphatase [Hordeum vulgare subsp. vulgare]	CCCTGACCCTATGCTATTTACATTAGTTGATTCTAAGAAAATTTTAATCATCAGGCAAGC	7.2	7	7.2	9.6	9.3	8.6	-2	9e-05	0.013
MICRO.2856.C2	MICRO.2856.C2_675	AAB64346	35.2	not assigned.unknown	NOT VALIDATED AAB64346: gibberellin 7-oxidase [Cucurbita maxima]	ACTGGATTCCCATAGCCCCTTCCAAAACAACTAATTGGTAACGTTGGAGATGTTATTCAG	7.8	8.2	7.4	9	9.6	9	-1.4	8.6e-05	0.013
MICRO.3382.C1	MICRO.3382.C1_1	CAA70700	35.1	not assigned.no ontology	NOT VALIDATED CAA70700: transformer-SR ribonucleoprotein [Nicotiana tabacum]	CAAAGAAGCGTCTTGCAGCAAAATCGTTTCCTTCGATTTAGGGTTTTCTCGTATCCTGGG	7.8	7.4	7.7	7.1	6.7	6.6	0.8	9.6e-05	0.013
MICRO.396.C2	MICRO.396.C2_1560	ABA01480	17.3.01.02.07	hormone metabolism.brassinosteroid.synthesis-degradation.sterols.DWF5	NOT VALIDATED ABA01480: sterol delta-7 reductase DWF5 [Gossypium hirsutum]	GTTGAACCAACATCTCATTTCTATGGTTGTAAGTTGTAACACGATGAAAAAGTTAGCTTG	8.9	8	9.4	12.1	11.7	10.9	-2.8	8.4e-05	0.013
MICRO.413.C1	MICRO.413.C1_1341	AAU95618	13.2.3.5	amino acid metabolism.degradation.aspartate family.lysine	NOT VALIDATED AAU95618: cytosolic acetoacetyl-coenzyme A thiolase [Nicotiana tabacum]	GATTGAGTGGTTGGTGTCTTCAAGTAGTGAAAGATTGTGAAATTTTTCTGTCTTCTTTCA	10.4	11	10.7	12.4	12.3	11.5	-1.4	0.0001	0.013
MICRO.4583.C3	MICRO.4583.C3_728	AAO85557	1.01.02.02	PS.lightreaction.photosystem I.PSI polypeptide subunits	NOT VALIDATED AAO85557: photosystem I subunit XI [Nicotiana attenuata]	ATTGAACTACTAAGCTCTTGGAGGAGTGCAATTTAACTCGTTGTAATGAGTTACTTGTCT	7.1	6.4	6.5	9.3	8.8	7.9	-2	0.0001	0.013
MICRO.5235.C1	MICRO.5235.C1_831	AAX95759	35.2	not assigned.unknown	NOT VALIDATED AAX95759: T10O24.15, related [Lycopersicon esculentum]	GCCTTCTTTAATTGAAAATCATTGTGGGCTTTGTCAGGATCGGAGCACCAAATTTTATTT	9.4	8.7	11.8	7.6	6.8	7.1	2.8	9.3e-05	0.013
MICRO.531.C5	MICRO.531.C5_696	NA	35.2	not assigned.unknown	NOT VALIDATED NA: NA	TGTAGCTAGATCATTTTTGGCGAGAATTTATGTAGTCGAGCCTTTCATTCTGCTGATATT	7.6	7.7	7.5	8.2	9.1	8.8	-1.1	9.4e-05	0.013
MICRO.6225.C2	MICRO.6225.C2_132	AAG00940	17.2.3	hormone metabolism.auxin.induced-regulated-responsive-activated	NOT VALIDATED AAG00940: unknown [Glycine max]	TCCGCCCCTTCGTCTACTTACGTTCCAATTTGACATGATAAATTTTCCTTGAAATGCACA	11.9	10.6	12.4	9.3	8.5	10	2.4	0.0001	0.013
MICRO.669.C1	MICRO.669.C1_984	NP_001062521	20.2.2	stress.abiotic.cold	NOT VALIDATED NP_001062521: Os08g0562600 [Oryza sativa (japonica cultivar-group)]	AAACAGTGATGGGATAAAAAATTTTGTGTCTTATTTAGTTGTCATGTATAAGATAACTTA	7.6	8.5	8.7	7.1	6.7	6.8	1.4	8.7e-05	0.013
MICRO.7317.C1	MICRO.7317.C1_847	NP_568558	27.1.1	RNA.processing.splicing	NOT VALIDATED NP_568558: nucleic acid binding [Arabidopsis thaliana]	ATATTCATTTGCTTTGACTGCAACAGATAGTTCAACCAATGTGGAAAGAGGAATGGAAAT	8.2	8.1	8.1	7.4	6.5	6.8	1.2	8.6e-05	0.013
MICRO.8109.C1	MICRO.8109.C1_861	NA	35.2	not assigned.unknown	NOT VALIDATED NA: NA	CAAGACATGATCAACGCACTGTTCAAACCAGTGGTAAAGTTGTATCTGGAGAGACAGCTA	8.3	8.1	7.6	6.7	6.7	6.5	1.3	8.5e-05	0.013
MICRO.8255.C1	MICRO.8255.C1_1209	ABE80213	26.22	misc.short chain dehydrogenase/reductase (SDR)	NOT VALIDATED ABE80213: Short-chain dehydrogenase/reductase SDR [Medicago truncatula]	ATTGTTGATTGGAAACAATATGTATCAGTATAAGTTGTTCGTTAACTTTGGGAGGAGCTG	6.7	6.2	6.8	7.6	7.7	7.3	-0.9	9.4e-05	0.013
POCBH58TP	POCBH58TP_717	ABI16020	27.3.08	RNA.regulation of transcription.C2C2(Zn) DOF zinc finger family	NOT VALIDATED ABI16020: Dof19 [Glycine max]	CCGATCTTCCAGGGTTCGGCCCATCTCCATGAGATTTTATAGGGTTTCTTCGCTTTATTT	8.1	7.2	7.9	6.7	6.8	6.8	1	0.0001	0.013
PPCCS28TH	PPCCS28TH_411	EAZ09402	29.5.05	protein.degradation.serine protease	NOT VALIDATED EAZ09402: hypothetical protein OsI_030634 [Oryza sativa (indica cultivar-group)]	TGTTCTTTGGCTAAATGGAGGTGATGTTTATATCATTTTCTCTTTCTTATCTTCGTCGCA	6.7	6.5	6.3	7.3	7.4	7.9	-1	8.8e-05	0.013
SSBN003H24u.scf	SSBN003H24u.scf_494	NP_974482	13.1.3.4	amino acid metabolism.synthesis.aspartate family.methionine	NOT VALIDATED NP_974482: ATHMT-2/HMT-2; homocysteine S-methyltransferase [Arabidopsis thaliana]	GCTGTGATGTGATGACATGGGTTGGTCAATTTTGAATGTCAACTTGCTGTTTTGTTAGCG	7.8	8.4	7.5	9.4	9.4	9	-1.4	0.0001	0.013
STDB002H09u.scf	STDB002H09u.scf_384	EAY75920	35.1	not assigned.no ontology	NOT VALIDATED EAY75920: hypothetical protein OsI_003767 [Oryza sativa (indica cultivar-group)]	TTTGTAACACTTCCTTGAAGATCCATACACGAAAATGGATCATAAATTATCTTGACACGG	8.3	7.7	8.3	7.4	7	6.7	1.1	8.6e-05	0.013
STMHY65TV	STMHY65TV_2	NP_190457	29.5.11.04.03.02	protein.degradation.ubiquitin.E3.SCF.FBOX	NOT VALIDATED NP_190457: unknown protein [Arabidopsis thaliana]	AAAGCCAGCAATACGCCGTGCTTTTCGTAAATGGAAAGATCTTGAATCACTGACCATGCC	9.3	8.6	9.2	7.7	8.4	7.9	1.1	0.0001	0.013
STMIF03TV	STMIF03TV_503	ABE94297	35.2	not assigned.unknown	NOT VALIDATED ABE94297: Homeodomain-like [Medicago truncatula]	GTCAGACGCGGAAGCGGATGTAAATGTAACTTTAGGATTTCCAAAGACACAATAGCTTTT	7.8	8.6	7.7	7.1	6.9	6.8	1.1	8.8e-05	0.013
STMJM75TV	STMJM75TV_237	AAZ79231	10.2	cell wall.cellulose synthesis	NOT VALIDATED AAZ79231: cellulose synthase-like protein CslG [Nicotiana tabacum]	CCTCCAAGGGTCACTATTTTCTCAACATTTCTTGCTTGTACTCTCTATATGGCATTTGCT	6.7	6.7	6.9	7.8	8.5	8.9	-1.6	9.8e-05	0.013
TBSK00801FC09.t3m.scf	TBSK00801FC09.t3m.scf_87	NA	35.2	not assigned.unknown	NOT VALIDATED NA: NA	CATCAAGCTACCCAGGTGAATCTCCTGGTACCTAAGCCGGTACTTCGACCACAAATGGTA	11.5	12.6	11.5	14.5	14.8	14.9	-2.8	0.0001	0.013
TBSK01776Fd12.t3m.scf	TBSK01776Fd12.t3m.scf_59	NA	35.2	not assigned.unknown	NOT VALIDATED NA: NA	CTACCAACTGTGACGAAACTTTTTCCAGCAACACGCAGATCCATTTGTAACAAACCTTGT	12.8	13.7	12.4	14.9	14.4	14.7	-1.7	0.0001	0.013
ACDA04237B01.T3m.scf	ACDA04237B01.T3m.scf_503	NA	35.2	not assigned.unknown	NOT VALIDATED NA: NA	ATATAAATAAATCTTTGGAGTTCCCAATTGTTAGGGCCAAGGTGTGAACGGGAGGGTTTG	7.3	7.7	7.5	6.7	6.9	6.4	0.8	0.00012	0.014
bf_arrayxxx_0023b08.t7m.scf	bf_arrayxxx_0023b08.t7m.scf_218	NA	35.1.9	not assigned.no ontology.BTB/POZ domain-containing protein	NOT VALIDATED NA: NA	GACAATCCCTCCTTGATATGTCTCTTCAAGCAAGCTCCAGTCATCACTAAATGTCTGCTG	11.6	12.5	10.5	13.4	13.6	14	-2.2	0.00011	0.014
bf_arrayxxx_0103f05.t3m.scf	bf_arrayxxx_0103f05.t3m.scf_297	NP_001051130	27.3.99	RNA.regulation of transcription.unclassified	NOT VALIDATED NP_001051130: Os03g0725400 [Oryza sativa (japonica cultivar-group)]	TTGGTTGCCAGAAATTTTGGGGAATTGCTTTCCAACCCGGGGCCATTGGTATTGAAAGAA	6.5	6.7	6.5	7.1	7.8	7.4	-0.8	0.00011	0.014
bf_cswbxxxx_0035d11.t3m.scf	bf_cswbxxxx_0035d11.t3m.scf_84	NA	35.2	not assigned.unknown	NOT VALIDATED NA: NA	CTACAGGTTTTAAGCTCCATTTGAAGGGGATGTCAAATCTTTGCTTATATCGTGTGAAAT	8.7	8	8.4	7.6	7.3	7.7	0.8	0.00011	0.014
bf_cswbxxxx_0067c02.t3m.scf	bf_cswbxxxx_0067c02.t3m.scf_342	NA	35.2	not assigned.unknown	NOT VALIDATED NA: NA	GGTGGTTTTTTGGGTGCAATTCTAACGTTGTTTTAGAGATGATTCTGATGCTGCTGTTTT	7.6	7.4	8	6.8	6.8	6.8	0.8	0.00011	0.014
bf_ivrootxx_0018d10.t3m.scf	bf_ivrootxx_0018d10.t3m.scf_537	NP_567098	29.6	protein.folding	NOT VALIDATED NP_567098: FK506 binding / peptidyl-prolyl cis-trans isomerase [Arabidopsis thaliana]	GAGATCAGAAGGTAGTTGTAGTTCTGAATCTTTTGATTTATGCTGAAAGTAACAGGAGAC	7.2	6.8	6.6	8	8	7.9	-1.1	0.00011	0.014
bf_ivrootxx_0039e08.t3m.scf	bf_ivrootxx_0039e08.t3m.scf_532	AAD30452	20.2	stress.abiotic	NOT VALIDATED AAD30452: 17.7 kD class I small heat shock protein [Lycopersicon esculentum]	GCAATTTGCATAAATAAATTGCCTGTCTACTTTGTAAGGTTGTATGTTGTGATGTGTGTG	12	8.3	12.7	6.7	6.8	7.7	4	0.00012	0.014
bf_ivrootxx_0049a08.t3m.scf	bf_ivrootxx_0049a08.t3m.scf_543	NP_172530	35.1	not assigned.no ontology	NOT VALIDATED NP_172530: unknown protein [Arabidopsis thaliana]	AGGCTATTGGCAATTGTCATGGACTCCTACCGATACATCAAGGGCATACGGAATATTTCG	10.6	10.1	10.8	9.8	9.6	9.6	0.8	0.00011	0.014
bf_ivrootxx_0052C06.t3m.scf	bf_ivrootxx_0052C06.t3m.scf_431	NA	35.2	not assigned.unknown	NOT VALIDATED NA: NA	CTGTCTGCTTGATTTCAAACTTATTCAATAGGATACCGTGTAACATCTACCGTGGTATAT	6.4	6.3	6.2	7.6	6.7	7.9	-1.1	0.00011	0.014
bf_stolxxxx_0067b10.t3m.scf	bf_stolxxxx_0067b10.t3m.scf_321	AAS75248	35.2	not assigned.unknown	NOT VALIDATED AAS75248: putative histone H2A [Oryza sativa (japonica cultivar-group)]	GGCTGTGAGGAAATGATGAAAACTTTGGGGACACTTTCTTGCTGGGTGTAACAATTGCAC	8.1	8.3	8.1	7.1	6.4	7.5	1.2	0.00011	0.014
bf_suspxxxx_0062d07.t3m.scf	bf_suspxxxx_0062d07.t3m.scf_708	NA	35.2	not assigned.unknown	NOT VALIDATED NA: NA	ATAGAACCTCAATCATACATGATGTTTGCAAGCAACTTTCTTGGTCCACATCTGGCAGGT	9.2	7.9	9.1	6.8	6.7	7.9	1.6	0.00012	0.014
BF_TUBSXXXX_0053C10_T3M.SCF	BF_TUBSXXXX_0053C10_T3M.SCF_602	NA	35.2	not assigned.unknown	NOT VALIDATED NA: NA	GAAGAGCAAACTCTCTTCCGAGAATCTTTTGCCCAAAAAGAGATTATCTCCTGATTACAT	8.9	8.3	8.6	7.9	7.6	7.5	0.9	0.00011	0.014
cSTB14J17TH	cSTB14J17TH_413	NP_176519	35.1	not assigned.no ontology	NOT VALIDATED NP_176519: unknown protein [Arabidopsis thaliana]	AATGAAGAAGTCTTTGTTTGAGGATGAATCGGAGAAAGAAAATTTGAGAAAGCAGCTGTC	7.6	7.8	7.6	6.7	6.6	6.9	0.9	0.00012	0.014
cSTD12H8TH	cSTD12H8TH_364	NP_001051182	34.9	transport.metabolite transporters at the mitochondrial membrane	NOT VALIDATED NP_001051182: Os03g0734700 [Oryza sativa (japonica cultivar-group)]	ATATGACTTCATGTTTCCACTGAATTGACCGATTAGTTATCTTATTGTCTTTGCATCAGG	6.9	6.5	6.6	7.5	7.7	8.1	-1	0.00012	0.014
MICRO.10923.C2	MICRO.10923.C2_1277	ABA08442	2.2.1.03.01	major CHO metabolism.degradation.sucrose.invertases.neutral	NOT VALIDATED ABA08442: neutral/alkaline invertase [Manihot esculenta]	TGTACTGTTGCATCCAGCGAGACCAATGTCTCGTTTATCAGTATAAAAGACCGCGTTTGA	8	8.4	8.2	7.4	7.3	7.1	1	0.00012	0.014
MICRO.13194.C1	MICRO.13194.C1_580	NP_001061297	35.1	not assigned.no ontology	NOT VALIDATED NP_001061297: Os08g0230200 [Oryza sativa (japonica cultivar-group)]	ATGTTTGGGCCGTTGTGAGTATACTTGTATTTCTAATATGCAATCCATGTACGGAAATGA	9.8	10.1	9.5	11.1	10.8	10.6	-1.1	0.00012	0.014
MICRO.15156.C1	MICRO.15156.C1_905	NP_188777	35.2	not assigned.unknown	NOT VALIDATED NP_188777: unknown protein [Arabidopsis thaliana]	TTCATAGAGCTCCCTTCAGGTCTAGCTTTATCAGAGTAACCCCTTTTGGGTTTACGAAAT	7.6	7.8	8.1	6.4	7.3	6.7	1	0.00012	0.014
MICRO.16339.C1	MICRO.16339.C1_549	CAA89834	20.2.1	stress.abiotic.heat	NOT VALIDATED CAA89834: luminal binding protein [Pseudotsuga menziesii]	AAGAGTGGTGCAAGTTCTGCAAATTCAGGAGATGAGGAGGAGGAGGCTTATGATGAATTA	11.6	8.9	12.3	8.3	8.2	7.3	3	0.00011	0.014
MICRO.17300.C1	MICRO.17300.C1_460	NP_194685	35.2	not assigned.unknown	NOT VALIDATED NP_194685: unknown protein [Arabidopsis thaliana]	CTTTTTGGACCTAGTTTCCGTAGGAAGCTACTATGACAATTTCAAACAGGTTTGCTGGGG	7.9	8.2	7.7	7.2	6.9	6.7	1	0.00011	0.014
MICRO.1732.C2	MICRO.1732.C2_1296	Q42948	13.1.3.5	amino acid metabolism.synthesis.aspartate family.lysine	NOT VALIDATED Q42948: Dihydrodipicolinate synthase, chloroplast precursor (DHDPS)	CTCTGTTTACGGACTAGATCCTGGTTAATCTTCTTCTGCCTCGGCATGTTGTGGTGTATT	6.6	6.5	6.6	7.2	7.9	7.2	-0.9	0.00012	0.014
MICRO.1751.C24	MICRO.1751.C24_496	ABB72793	20.1.07.06	stress.biotic.PR-proteins.proteinase inhibitors	NOT VALIDATED ABB72793: Kunitz-type protease inhibitor-like protein [Solanum tuberosum]	AGAATTTAACGAATGCATCTTCTAGGGGAACGAATGGTGGTTGGAGAACTGGAGGAACCA	10.7	12.1	9.7	12.9	13.4	13.6	-2.5	0.00011	0.014
MICRO.2385.C2	MICRO.2385.C2_1100	CAA99759	27.4	RNA.RNA binding	NOT VALIDATED CAA99759: unknown [Solanum lycopersicum]	TGTGTTTGTGGTAGTTACTTTGGCTATATGTAGCACAAAGGTTTGCTACCTAAATAAGTA	14.8	14.7	14.6	13.7	13.7	13.5	1.1	0.00012	0.014
MICRO.247.C1	MICRO.247.C1_1020	NP_194452	20.1.02	stress.biotic.receptors	NOT VALIDATED NP_194452: ATP binding [Arabidopsis thaliana]	ATTACGCAAACTGCATATATCCCATTGTCGTACTTTAACATGTCTTTTTAATGTTGGTGG	7.4	8	7.2	8.9	9.1	9.4	-1.6	0.00011	0.014
MICRO.2996.C1	MICRO.2996.C1_65	BAA90760	7.3	OPP.electron transfer	NOT VALIDATED BAA90760: non-photosynthetic ferredoxin [Ipomoea nil]	ATTCTTGATTCATTATCAGCCAACCCCACTTCTTATATTGGTAAAACATGTCGACCGTGA	14.8	13.7	14.9	12.4	12.5	12.9	1.9	0.00011	0.014
MICRO.3953.C1	MICRO.3953.C1_780	P49972	29.3.4.99	protein.targeting.secretory pathway.unspecified	NOT VALIDATED P49972: Signal recognition particle 54 kDa protein 2 (SRP54)	GTTGCTGAAGCACGAAACCAGATCTTGTGATATTTGTTATGGATAGCAGAATTGGTCAAG	8.1	8.3	8	6.7	7.2	7.1	1.1	0.00011	0.014
MICRO.4801.C2	MICRO.4801.C2_989	AAV85853	35.2	not assigned.unknown	NOT VALIDATED AAV85853: AT-rich element binding factor 3 [Pisum sativum]	GCTTGTTTCCAGAGCTTTGTATATATAAAAGTTGTAGAACTCTTGTCTGGACTTGAGAGT	9.8	10.3	10.7	9.1	9	8.4	1.4	0.00011	0.014
MICRO.5980.C1	MICRO.5980.C1_1427	BAD61850	11.3	lipid metabolism.Phospholipid synthesis	NOT VALIDATED BAD61850: putative coclaurine N-methyltransferase [Oryza sativa (japonica cultivar-group)]	GATTGCAGCCTTACTGTCACACATCATCTTCACATGTAATTCAATCTTAACTCCAAGTTC	9.1	9.2	9.5	8.4	8.4	7.7	1.1	0.00012	0.014
MICRO.6204.C1	MICRO.6204.C1_1	AAP86780	35.2	not assigned.unknown	NOT VALIDATED AAP86780: Mal d 1-associated protein [Malus x domestica]	CAGAAACATCCATGAATTGTTGGCCAAGCCAATTGAAGCAAATCGAAGAGCAATGGGTTG	9.4	8.4	9.1	8.3	6.9	7.1	1.5	0.00011	0.014
MICRO.6255.C2	MICRO.6255.C2_751	NP_190452	27.1	RNA.processing	NOT VALIDATED NP_190452: RNA binding / nucleic acid binding / nucleotidyltransferase/ polynucleotide adenylyltransferase [Arabidopsis thaliana]	TTCCATGTAATTTGTTTTGTGGTGAATAGAGTTTAGCTTTGCCTGAGAGTTTCTTAAGGA	6.6	6.4	6.6	7.4	8	7.2	-1	0.00011	0.014
MICRO.6663.C6	MICRO.6663.C6_256	CAA64766	17.7.1.2	hormone metabolism.jasmonate.synthesis-degradation.lipoxygenase	NOT VALIDATED CAA64766: lipoxygenase [Solanum tuberosum]	AGGCGTTCTTGAAAACAATCACAGCTCAATTACAAACATTGCTTGGTGTTTCCCTCATAG	12.2	12.7	12.1	14.3	14	14.1	-1.8	0.00011	0.014
MICRO.705.C2	MICRO.705.C2_710	NA	35.2	not assigned.unknown	NOT VALIDATED NA: NA	AAACAGCAACCTCCACTTTCTCTTTCTGGTCCTCAGACAAGCAGTCGATGTTACTAATGG	9.8	9.2	10.1	8.7	8.4	8.6	1.1	0.00012	0.014
MICRO.8284.C1	MICRO.8284.C1_1265	BAD93693	35.1	not assigned.no ontology	NOT VALIDATED BAD93693: acyltransferase-like protein ACYL3a [Nicotiana tabacum]	AAGACATGTCTGTATTTGAGCACGATGAAGAGTTTCTTGAATTTGCTTCTCCATATGCAA	6.7	6.8	6.8	7.8	9	8	-1.5	0.00012	0.014
SDBN001J07u.scf	SDBN001J07u.scf_609	NP_197386	34.13	transport.peptides and oligopeptides	NOT VALIDATED NP_197386: unknown protein [Arabidopsis thaliana]	TGTTATGTTGTGTAGACTTTCAAACTTTTGAAGTGTTGGCAATTGTTGCTACACCTTGTA	9.5	10.3	10	10.8	11	11.5	-1.1	0.00012	0.014
SSBN003C08u.scf	SSBN003C08u.scf_381	BAF00668	29.5.11.04.02	protein.degradation.ubiquitin.E3.RING	NOT VALIDATED BAF00668: hypothetical protein [Arabidopsis thaliana]	GGCCGACGAGGGGTAATCATGTGTAGAAATTTCTACTTCAGGGAACTTCATTCTGTTTTT	8	8.4	9	7.3	7.4	6.7	1.3	0.00011	0.014
STDB004O12u.scf	STDB004O12u.scf_304	P37831	17.7.1.2	hormone metabolism.jasmonate.synthesis-degradation.lipoxygenase	NOT VALIDATED P37831: Lipoxygenase 1	GAAGCTGACAGACATTGAAAAACAGATCATACAGAGGAACTGGTGACAACATATTGACAA	10.8	11.2	10.6	13.1	12.9	12.2	-1.8	0.00012	0.014
STMCI43TV	STMCI43TV_555	ABO82869	35.1	not assigned.no ontology	NOT VALIDATED ABO82869: NUDIX hydrolase [Medicago truncatula]	GAACAAGAAAAAAGTCAGGGAGTTAATATATAGTGTATATATCTTCTGCTGAGGACATGG	9.1	9.5	8.9	10.9	10.5	10.5	-1.5	0.00011	0.014
STMHL35TV	STMHL35TV_69	ABN09201	27.3.35	RNA.regulation of transcription.bZIP transcription factor family	NOT VALIDATED ABN09201: TGA transcription factor 2 [Populus tremula x Populus alba]	GTGTTTTATGTGGATTGTGGCTTCGCCCCCTTCGGACTTTCTTAAGCTTCTAGTCAATCA	9.3	8.6	8.9	7.8	8	8.2	1	0.00011	0.014
TBSK03752FA08.t3m.scf	TBSK03752FA08.t3m.scf_179	NA	33.1	development.storage proteins	NOT VALIDATED NA: NA	ATTGGAGCATAAACTATGAGTTCCAATCTTTGTTGATGGGTGCTGTTGCTACTGTTGGGT	11.5	13.2	10.3	14	14.2	14.4	-2.6	0.00012	0.014
bf_arrayxxx_0053d01.t7m.scf	bf_arrayxxx_0053d01.t7m.scf_254	ABC55684	33.1	development.storage proteins	NOT VALIDATED ABC55684: patatin protein group J-1 [Solanum tuberosum]	TGGCGGAAACAATTATTGAAGGAAACCAGTTTCCAAAGACCAGTCCCTGGAAACCTTATG	9.6	11.4	8.1	12.9	13.4	12.3	-3.2	0.00014	0.015
BF_CSCHXXXX_0016B09.T3M.SCF	BF_CSCHXXXX_0016B09.T3M.SCF_680	NA	35.1	not assigned.no ontology	NOT VALIDATED NA: NA	TACTATCATTGTGATTTGTGTAACATTTGGATCTTCATCTTTGAATGTGCTTCTGTGACG	7.3	6.7	7.4	8.5	7.8	8.9	-1.3	0.00014	0.015
bf_ivrootxx_0031g11.t3m.scf	bf_ivrootxx_0031g11.t3m.scf_530	NA	35.2	not assigned.unknown	NOT VALIDATED NA: NA	TGCGTGTGAGCTTTACATAAATACCCTATGCTTTGTTTGTTGTTTAATTTGTCCATGTTG	12.5	13.3	12.3	13.8	14.1	14.1	-1.3	0.00013	0.015
bf_ivrootxx_0056g08.t3m.scf	bf_ivrootxx_0056g08.t3m.scf_562	C96622	35.1	not assigned.no ontology	NOT VALIDATED C96622: probable ATPase F23H11.14 [imported] - Arabidopsis thaliana	TTCAATATGCTATGGTTGTTAAGAATTGTTAGACCTGCTGTAACTAAGGTCTATAAACGC	6.8	6.4	6.8	7.6	7.4	7.5	-0.9	0.00013	0.015
BF_LBCHXXXX_0041C09_T3M.SCF	BF_LBCHXXXX_0041C09_T3M.SCF_153	NA	20.2.1	stress.abiotic.heat	NOT VALIDATED NA: NA	TGCTTCGATCTGTTGAATACGACTTGCAGAATTTTATTGGCATAATACATAAATTGGACC	9.8	10.6	9.7	11.6	11.2	10.9	-1.2	0.00014	0.015
BF_LBCHXXXX_0042A02_T3M.SCF	BF_LBCHXXXX_0042A02_T3M.SCF_97	NA	35.2	not assigned.unknown	NOT VALIDATED NA: NA	AGTCTTGATCCTAGAAGATTAATATGTCACGCTTGGCTTTCACAGAAATAAACAGGTTGT	12.3	11.1	11.4	10.2	10.6	10	1.3	0.00013	0.015
bf_mxflxxxx_0005b01.t3m.scf	bf_mxflxxxx_0005b01.t3m.scf_242	NA	35.2	not assigned.unknown	NOT VALIDATED NA: NA	ATGTGAGCTTTACATAAATGCCTCATGCATGCTTTGTTTGTTGTTTGAGAGTATGGTGAA	9.6	10.4	9.3	11	11.2	11	-1.3	0.00014	0.015
BPLI14O6TH	BPLI14O6TH_733	P53504	31.1	cell.organisation	NOT VALIDATED P53504: Actin-1	CCTCTGGGATTGGAGGGTCTATCTTAACTTCTCTCCACACCTTTCCACAGATGTGAATAA	11.7	11.2	11.1	10.3	10.2	10.4	1	0.00013	0.015
MICRO.14837.C1	MICRO.14837.C1_1048	AAF16649	20.2.99	stress.abiotic.unspecified	NOT VALIDATED AAF16649: T23J18.3 [Arabidopsis thaliana]	GTGGAATAACTATCTTTTGAAGCTGCTTTGCAAGTTCAACTTCCCTGTTGAATGCTTTAC	8.1	8.4	8.7	7.3	7.1	7.8	1	0.00013	0.015
MICRO.1751.C15	MICRO.1751.C15_21	Q41448	20.1.07.06	stress.biotic.PR-proteins.proteinase inhibitors	NOT VALIDATED Q41448: Aspartic protease inhibitor 7 precursor (Cathepsin D inhibitor p749)	TTATGTCTGTGTAGTGTCTTCCCAGTGTTGGTATTGTACGAGCAACTTTCACTTCCCAAA	6.9	7.1	7.1	8.2	9	8.5	-1.5	0.00013	0.015
MICRO.2614.C1	MICRO.2614.C1_1820	NP_180232	11.1.10	lipid metabolism.FA synthesis and FA elongation.beta ketoacyl CoA synthase	NOT VALIDATED NP_180232: acyltransferase [Arabidopsis thaliana]	GGATGAAATTCACCAGTTCCCTGTTGATGTTCCAAAAGTTGCAAGAATCTAAACAACTCA	9.1	10.3	8.8	11.3	11.5	10.7	-1.7	0.00014	0.015
MICRO.4442.C6	MICRO.4442.C6_200	NA	35.2	not assigned.unknown	NOT VALIDATED NA: NA	CTTCTTGAGGAATGCTTCATAATGCCTTTGGCAAGTTCGCATTGCAATGGGATGAGCAAC	6.5	6.6	6.7	7.1	8	7.4	-0.9	0.00014	0.015
MICRO.4497.C4	MICRO.4497.C4_296	AAA81890	26.01	misc.misc2	NOT VALIDATED AAA81890: epoxide hydrolase	TTCAGAAAATAATGTTAGCTTCGGATTATCTAATCCCATAATTTGGCTTGTAAGTTCCCC	8.2	8.8	8.1	9.3	9.2	9.4	-0.9	0.00013	0.015
MICRO.9352.C1	MICRO.9352.C1_265	ABE88265	20.2.3	stress.abiotic.drought/salt	NOT VALIDATED ABE88265: Generic methyltransferase [Medicago truncatula]	GCAATGTCAACGTATCCAAGAACTTACGACTTCATACATGCTGATTCGCTCTTCACCCTA	8.3	7.7	8.7	7.6	6.8	6.6	1.2	0.00014	0.015
POCAL62TV	POCAL62TV_547	NA	35.2	not assigned.unknown	NOT VALIDATED NA: NA	CTTCTCGCGTTAACAGGGTTTTTGAGCTTAAAGATGGAAGATTTGAAGAGTTGTCATGAA	7.3	7.2	7.2	7.8	8	8.1	-0.8	0.00013	0.015
SDBN004E17u.scf	SDBN004E17u.scf_383	NA	35.2	not assigned.unknown	NOT VALIDATED NA: NA	CCATCTCATTCAATTATTCTTATGAGATGGTGAATGTTTTGTTAGGATAAATGCTCCACC	7.8	7.4	7.7	6.8	6.5	7.1	0.8	0.00014	0.015
TBSK02558FF02.t3m.scf	TBSK02558FF02.t3m.scf_460	NA	35.2	not assigned.unknown	NOT VALIDATED NA: NA	TTGACAGACTTTGCCATCTCTTGCTTTGACATCCTTACACATAAGCCGTATTATTCACTA	8	7.8	7.5	8.9	9.5	9.4	-1.5	0.00013	0.015
030C05AF.esd	030C05AF.esd_292	AAZ94184	20.1.07.06	stress.biotic.PR-proteins.proteinase inhibitors	NOT VALIDATED AAZ94184: Kunitz-type protease inhibitor precursor [Solanum tuberosum]	GTTGGACGTAGCGGTACAACCCGTTAGATTCCATTCCCTTTAATCTTACCAAAATTATTC	12.7	13.7	12	15	15.1	15.3	-2.3	0.00015	0.016
174G02AF.esd	174G02AF.esd_341	AAO19451	2.1.2.05	major CHO metabolism.synthesis.starch.transporter	NOT VALIDATED AAO19451: glucose-6-phosphate/phosphate translocator 2 [Solanum tuberosum]	CTTTCCCATTGCCAGTGTACCTTCCACTTATTGCCAATTATTGATGCTTGTGGACTTGCT	9.3	11.5	8.9	13.5	13.3	13.2	-3.4	0.00015	0.016
ACDA01230G06.T3m.scf	ACDA01230G06.T3m.scf_352	AAM10742	35.2	not assigned.unknown	NOT VALIDATED AAM10742: putative kunitz-type proteinase inhibitor precursor P1D4 [Solanum tuberosum]	CGAAGATGAACTACTCGAGCATCCAATTCGCTAATTTCAACATCGGAAATTTGTGTGTTA	12.9	14	12.1	14.9	15	15.3	-2	0.00016	0.016
bf_arrayxxx_0027e10.t7m.scf	bf_arrayxxx_0027e10.t7m.scf_436	AAC23542	35.2	not assigned.unknown	NOT VALIDATED AAC23542: receptor protein kinase [Ipomoea trifida]	GATGGTGACGCCCTCAGAAAGTGTATATTACTACAAGAGGTTCACAATTTTCTCTTGTAT	8.1	8.7	8.8	6.9	7	6.9	1.6	0.00015	0.016
BF_CSCHXXXX_0035C09.T3M.SCF	BF_CSCHXXXX_0035C09.T3M.SCF_735	NA	35.2	not assigned.unknown	NOT VALIDATED NA: NA	TCGTAGTACACCGAATTGGCAAAAAGACTTTCGGCTCTTGTCCAGGACAATCCTCTTGAT	11.3	12.6	10.3	13.5	13.6	13.9	-2.3	0.00015	0.016
bf_cswbxxxx_0025d02.t3m.scf	bf_cswbxxxx_0025d02.t3m.scf_48	NA	35.2	not assigned.unknown	NOT VALIDATED NA: NA	AATGCTCAGTCGAGCAGGACTGAAGAGTTGTAGTATGACTGTTGCATTTGGTACTATTTC	13.8	13.6	13.9	13	13	13.2	0.7	0.00016	0.016
BF_LBCHXXXX_0036F10_T3M.SCF	BF_LBCHXXXX_0036F10_T3M.SCF_175	NA	29.5.11.04.02	protein.degradation.ubiquitin.E3.RING	NOT VALIDATED NA: NA	TTTTAAAGTTCTTCTCATTTAGTGTACGTATGTATAGACGTATGTCGATGAAGCAGTAGC	7.3	6.7	6.9	7.9	7.7	8.6	-1.1	0.00015	0.016
BF_LBCHXXXX_0044A02_T3M.SCF	BF_LBCHXXXX_0044A02_T3M.SCF_576	NA	35.1	not assigned.no ontology	NOT VALIDATED NA: NA	GCTTTTTCTTACGGTTTTGCTCCCGCTTTCCACTGCAAAGCACCATTGCTTTTAAAATGA	7.3	6.8	7	7.6	8.6	8.4	-1.2	0.00014	0.016
bf_mxflxxxx_0033a03.t3m.scf	bf_mxflxxxx_0033a03.t3m.scf_158	NP_195822	35.2	not assigned.unknown	NOT VALIDATED NP_195822: unknown protein [Arabidopsis thaliana]	CATGGAGCAAATCAGCTACAGCTTACGTGACGAAAAATAAACAAGGTGCAGGGCATTGCA	8.9	9	8.5	8	6.8	7.9	1.2	0.00016	0.016
bf_slmwxxxx_0005e11.t3m.scf	bf_slmwxxxx_0005e11.t3m.scf_213	AAC95130	35.2	not assigned.unknown	NOT VALIDATED AAC95130: metallocarboxypeptidase inhibitor IIa precursor [Solanum tuberosum]	TTGGCGGCGCCATGGACATGGCATGTAATTTCAATATTATTGCCTTAAGTGTTGTTCTTT	10.3	11.2	9.5	12.2	12.4	11.9	-1.8	0.00016	0.016
bf_stolxxxx_0019f07.t3m.scf	bf_stolxxxx_0019f07.t3m.scf_16	NA	35.2	not assigned.unknown	NOT VALIDATED NA: NA	AAATGGGCGACGTTCAGTAGACGTGCTTCCGTCGGTGGTCTGGCATTGGGGCGACACCAG	13.6	13.3	13.1	12.4	11.6	12.3	1.2	0.00016	0.016
bf_suspxxxx_0018E03.t3m.scf	bf_suspxxxx_0018E03.t3m.scf_184	NA	34.16	transport.ABC transporters and multidrug resistance systems	NOT VALIDATED NA: NA	GATATCGTATCATGCATGTGCCACTTAAACATAGTGATTATAGACTAAATATTTATTTTG	7.5	7.4	7.4	6.8	6.8	6.7	0.7	0.00015	0.016
BF_TUBSXXXX_0002F05_T3M.SCF	BF_TUBSXXXX_0002F05_T3M.SCF_219	NA	35.2	not assigned.unknown	NOT VALIDATED NA: NA	TTAGCTAGCTCTCAAGTCTCAAGAATAATATGTGTAATAGACGTCTTGTAATGGAGTAAC	7.2	8.6	7.2	9.7	9.6	9.4	-1.9	0.00015	0.016
MICRO.11107.C1	MICRO.11107.C1_202	NP_568142	35.2	not assigned.unknown	NOT VALIDATED NP_568142: unknown protein [Arabidopsis thaliana]	TCGTACTTGTCGTATCTTTTTGTGATCCAACCCTCTATGGAAAATATACACTCCAAAGAA	10.9	9.5	11.2	9	8.5	9.1	1.7	0.00016	0.016
MICRO.11142.C1	MICRO.11142.C1_490	NA	35.2	not assigned.unknown	NOT VALIDATED NA: NA	AATGAGTCTTCACATCTCGTACATGTATGCCTTTTTAAGTTTTATCATCACTGGACATTG	10	10.3	9.7	10.8	11.3	11.1	-1.1	0.00016	0.016
MICRO.11738.C1	MICRO.11738.C1_893	AAB67865	17.7.1.2	hormone metabolism.jasmonate.synthesis-degradation.lipoxygenase	NOT VALIDATED AAB67865: lipoxygenase [Solanum tuberosum]	GGACTCACAGGCAAAGGAATACCTAATAGTGTGTCAATATAGTACTTTCATTTAAATCTC	8.4	8.8	8.9	10.4	10.5	9.4	-1.4	0.00015	0.016
MICRO.11970.C2	MICRO.11970.C2_303	AAU90323	35.2	not assigned.unknown	NOT VALIDATED AAU90323: KH domain containing protein [Solanum demissum]	TAGCAGTGCAGGGGTTTCCAGCCATAACCCTTCTGCCTATGGAAAATCTTATGGATACTA	9.8	9.6	9.5	9	9.1	8.7	0.7	0.00016	0.016
MICRO.12691.C2	MICRO.12691.C2_788	AAW31716	11.1.03	lipid metabolism.FA synthesis and FA elongation.ketoacyl ACP synthase	NOT VALIDATED AAW31716: plastid beta-ketoacyl ACP synthase [Betula pendula]	CCTTTACACATAACAGCAAATGATTTATGTGACACTTAGGTGTTTGCATATATGCTAGTG	9.4	10	9.5	10.6	10.7	10.3	-0.9	0.00016	0.016
MICRO.16457.C1	MICRO.16457.C1_481	AAL75909	35.1	not assigned.no ontology	NOT VALIDATED AAL75909: AT3g50440/T20E23_40 [Arabidopsis thaliana]	GCCCACAGTACATGCAAGCTAATCTTTACAAGCATTGCCAACCAGAGGTTATTACTCCTT	8.7	9.4	9	10	10.2	10.1	-1.1	0.00014	0.016
MICRO.1751.C46	MICRO.1751.C46_608	AAM21642	20.1.07.06	stress.biotic.PR-proteins.proteinase inhibitors	NOT VALIDATED AAM21642: putative Kunitz-type proteinase inhibitor [Solanum tuberosum]	AAAGTTGGGTGTAGTTCACCAAAATGGGAAAAACAAAGACCGTTTTGGCTCTTGTCAAGG	13.1	14.4	12.2	15.3	15.2	15.4	-2.1	0.00016	0.016
MICRO.1836.C1	MICRO.1836.C1_1112	NA	35.2	not assigned.unknown	NOT VALIDATED NA: NA	GTATCCATCCTATTCGAGATGATGGTCAGGCCAGCAATACTTAGCTCAGTTGAGGCAATT	8.2	7.5	7.7	6.8	6.8	6.8	1	0.00016	0.016
MICRO.1948.C1	MICRO.1948.C1_1391	CAA07683	16.1.1	secondary metabolism.isoprenoids.non-mevalonate pathway	NOT VALIDATED CAA07683: geranylgeranyl reductase [Nicotiana tabacum]	CACTAAGAAGGGAAATGGATAAGCTCAGTGTATAAGAAGAGGATGAAATTTCATACTAGC	10.5	11.1	10.1	12.3	11.5	11.9	-1.3	0.00016	0.016
MICRO.2867.C1	MICRO.2867.C1_1649	NP_173131	35.1	not assigned.no ontology	NOT VALIDATED NP_173131: unknown protein [Arabidopsis thaliana]	TACATCATTACACTGGGCTATTGTTCTTTCCATTTCCTTTTGCTTGTTTTTCCGACGTGG	10.3	10.9	10.1	11.4	11.5	11.4	-1	0.00014	0.016
MICRO.3403.C1	MICRO.3403.C1_783	AAS46242	10.7	cell wall.modification	NOT VALIDATED AAS46242: xyloglucan endotransglucosylase-hydrolase XTH6 [Lycopersicon esculentum]	TAAGCTACCACCTGGTTCACTGCTGGAAATATACTTCTTTCTATGGGAGTATTTAATTTA	7.1	7.6	7.1	9.1	9	9	-1.8	0.00016	0.016
MICRO.3745.C1	MICRO.3745.C1_547	P00061	9.6	mitochondrial electron transport / ATP synthesis.cytochrome c	NOT VALIDATED P00061: Cytochrome c	ACAGTGTCATGCCATTCTTCTGGTTGAGCTAAGCCAGTCTTGAAGGAATTTTGTCCAAGA	13.7	13.6	13.9	12.6	12.8	12.7	1	0.00015	0.016
MICRO.3788.C2	MICRO.3788.C2_1418	P56725	26.02	misc.UDP glucosyl and glucoronyl transferases	NOT VALIDATED P56725: Zeatin O-xylosyltransferase (Zeatin O-beta-D-xylosyltransferase)	CGAATGGAGTTGGATTCTTTTATCGTGCATATCACAAGATAAGAGTAGCTTTTCCCCAGA	8.4	9.6	8.5	9.8	10.3	10.5	-1.4	0.00016	0.016
MICRO.3918.C1	MICRO.3918.C1_664	NP_001064672	11.8	lipid metabolism.'exotics' (steroids, squalene etc)	NOT VALIDATED NP_001064672: Os10g0436800 [Oryza sativa (japonica cultivar-group)]	CCCCCCAAAAATGATGAGATTTCAGTGATATCTGTGGATGAGCTGATGGAAGCTGATGGA	8.4	7.9	8.5	7.7	5.8	6.6	1.5	0.00014	0.016
MICRO.4861.C1	MICRO.4861.C1_1117	ABH02859	27.3.26	RNA.regulation of transcription.MYB-related transcription factor family	NOT VALIDATED ABH02859: MYB transcription factor MYB138 [Glycine max]	TTTGTGGTCTTAGGTGATTATAGTACCAAGTTGATACTATCTTTGTCAATGTCACTCATG	7	8	6.8	8.5	9	8.8	-1.5	0.00016	0.016
MICRO.4897.C1	MICRO.4897.C1_1559	NP_568029	26.01	misc.misc2	NOT VALIDATED NP_568029: formamidase/ hydrolase, acting on carbon-nitrogen (but not peptide) bonds, in linear amides [Arabidopsis thaliana]	ATTTTTGAATCATAACACGGTAAACTTCATACTAGGACTAATCATCCTAATGTTGCTGCC	8.9	9.7	9.1	10.2	10.4	10.2	-1	0.00016	0.016
MICRO.5072.C2	MICRO.5072.C2_484	AAM09517	16.2.1	secondary metabolism.phenylpropanoids.lignin biosynthesis	NOT VALIDATED AAM09517: putative glucosyltransferase [Phaseolus lunatus]	TCTTTCAACCCTGTTGATCAATTCTCTGTTGTACTACTACTATTTTGAGTGTACTTGTGG	6.9	6.9	6.8	9.8	9.9	8.4	-2.5	0.00016	0.016
MICRO.5176.C3	MICRO.5176.C3_174	NA	1.01.04	PS.lightreaction.ATP synthase	NOT VALIDATED NA: NA	GGTAAGAGTTAACAGCTTGTTTGGATGGTTGTTACATGTAATATTGTACTGTGTTGTTAG	10.8	11.3	10.4	11.7	12.1	11.9	-1.1	0.00016	0.016
MICRO.5773.C1	MICRO.5773.C1_1	NP_565684	27.3.11	RNA.regulation of transcription.C2H2 zinc finger family	NOT VALIDATED NP_565684: nucleic acid binding / transcription factor/ zinc ion binding [Arabidopsis thaliana]	ATCAAAACAAGACAAAGAACAAACAGAAAAGAGATGCCATGAAGTAACCCTTCCACCAAA	7.6	7.1	8	6.7	6.4	6.8	1	0.00015	0.016
MICRO.5975.C2	MICRO.5975.C2_39	NA	35.2	not assigned.unknown	NOT VALIDATED NA: NA	CCTCAAAACACCTAGCGTTTCTCTCTCTGGAATTGCAAAGAGATAAAATATGCTACTCAT	7.8	7.5	7.7	6.9	6.6	6.9	0.9	0.00015	0.016
MICRO.6663.C9	MICRO.6663.C9_987	AAD04258	17.7.1.2	hormone metabolism.jasmonate.synthesis-degradation.lipoxygenase	NOT VALIDATED AAD04258: 5-lipoxygenase [Solanum tuberosum]	GGAATTCCCAACAGTGTGTCAATATAGAAGAAGGTCGACACCGGAAAATGAAGAAAGCTG	12.9	13.6	13	15.1	15	14.6	-1.7	0.00016	0.016
MICRO.6879.C3	MICRO.6879.C3_19	AAP41846	29.5.03	protein.degradation.cysteine protease	NOT VALIDATED AAP41846: cysteine protease [Anthurium andraeanum]	CCTCCACCACCTTATCCAAAACCAAGTGAATGTGGAGGCTGGTATTCTTGTCCTGAATAT	7.9	8.4	7.7	9.1	9.4	8.9	-1.2	0.00014	0.016
MICRO.6939.C1	MICRO.6939.C1_704	NP_850563	17.5.3	hormone metabolism.ethylene.induced-regulated-responsive-activated	NOT VALIDATED NP_850563: unknown protein [Arabidopsis thaliana]	TACACCTCTTAAGTTAATAACTCATATCCAATCCATTACACCATTAATCTTCTACTGGGG	11.5	9.4	10.6	9	7.6	8.5	2.1	0.00015	0.016
MICRO.7015.C2	MICRO.7015.C2_1344	AAP97493	10.1.02	cell wall.precursor synthesis.UGE	NOT VALIDATED AAP97493: UDP-Glc-4-epimerase [Solanum tuberosum]	TTTTCCTTTAATGGTTTTATGGGAACTTGAATGTTCCTCCTATTATGATCCCTTCAACCA	12.1	11.8	11.8	11.2	10.5	10.6	1.1	0.00014	0.016
MICRO.9038.C2	MICRO.9038.C2_969	NP_198805	35.2	not assigned.unknown	NOT VALIDATED NP_198805: unknown protein [Arabidopsis thaliana]	TAATTGCCAAAATATCTTGTATTCCAATTGGTCTGTTCAGTTTAGGGAAAAAATGGCTGG	8.7	8.7	10.7	7.7	7.1	6.6	2.2	0.00015	0.016
MICRO.9351.C1	MICRO.9351.C1_1330	AAC34951	17.3.01.02.01	hormone metabolism.brassinosteroid.synthesis-degradation.sterols.SMT1	NOT VALIDATED AAC34951: S-adenosyl-methionine-sterol-C- methyltransferase [Nicotiana tabacum]	GTTGGGCCTTTTGCTAAATATATGACAATGACATTAAGGTGATACATTCTGTTCTTCTTC	14.7	11	14.9	9.6	9.4	10.1	3.8	0.00016	0.016
MICRO.9972.C1	MICRO.9972.C1_1191	AAT38766	28.1	DNA.synthesis/chromatin structure	NOT VALIDATED AAT38766: Polyprotein, putative [Solanum demissum]	ATCCTAAGAAACAACTCAAATGGCAAAGGTAACAGATAAGAAACTGATCAGCCATACCCT	6.8	6.6	7.1	7.3	7.9	7.9	-0.9	0.00016	0.016
POCBQ10TP	POCBQ10TP_963	AAM65327	34.3	transport.amino acids	NOT VALIDATED AAM65327: putative amino acid transport protein [Arabidopsis thaliana]	TCTTGGGGTTTTCATGGCTTTGATATCTCTAATGTATGGTGCTTTTTGTGTATTGGGATA	8	8.3	7.4	9.7	8.9	9.6	-1.5	0.00015	0.016
TBSK00370FG10.t3m.scf	TBSK00370FG10.t3m.scf_479	BAC23033	35.2	not assigned.unknown	NOT VALIDATED BAC23033: kunitz-type trypsin inhibitor [Solanum tuberosum]	AACTGACTTGGTGACACCAGAACGTTTCCACCATTTGTATACCCAGTTACTTGCCATTGT	10.8	11.7	9.7	12.7	13.3	12.8	-2.3	0.00016	0.016
ACDA03977D05.T3m.scf	ACDA03977D05.T3m.scf_441	NA	35.2	not assigned.unknown	NOT VALIDATED NA: NA	GATAGATGGGGTCAACTCACGAGTTGAATGAGTGGGATAAGAACGCTATAATCTACGCGT	7.9	8.3	7.7	7	7	6.9	1	0.00018	0.017
bf_ivrootxx_0005b08.t3m.scf	bf_ivrootxx_0005b08.t3m.scf_2	ZP_01682807	26.22	misc.short chain dehydrogenase/reductase (SDR)	NOT VALIDATED ZP_01682807: inner membrane transport protein YdhC [Vibrio cholerae V52]	CTAAGGGCCATGAACATGGATCTTGTAGACTGGCTTGCTATTGTAAACAGTTACCAGGGA	9.4	8.9	9	8.6	7.2	7.5	1.3	0.00017	0.017
BF_LBCHXXXX_0017F04_T3M.SCF	BF_LBCHXXXX_0017F04_T3M.SCF_71	NA	13.1.1.2	amino acid metabolism.synthesis.central amino acid metabolism.aspartate	NOT VALIDATED NA: NA	GTTTCCTCCTAAGTTGGAGGTTAGTTATAATAAACCTGTATCTGTAATGAGTAGAATAAA	10.2	9.9	10	9	9.3	8.9	1	0.00018	0.017
bf_mxlfxxxx_0035h09.t3m.scf	bf_mxlfxxxx_0035h09.t3m.scf_21	NA	35.2	not assigned.unknown	NOT VALIDATED NA: NA	TCAACAAACATGGACTTCTCACAAATTGAAATTAACGCACTGAGTTTTCCAGAAGTCATT	10.6	10.1	10.7	8.9	8.7	10	1.2	0.00018	0.017
bf_mxlfxxxx_0036d10.t3m.scf	bf_mxlfxxxx_0036d10.t3m.scf_251	ABE78792	20.2.2	stress.abiotic.cold	NOT VALIDATED ABE78792: Protein of unknown function UPF0057 [Medicago truncatula]	CATTTTGCCTTGTTTACTACACCACTTGAGATTGTGTGGTTGTTGCCTTGTTTATTCTTG	9.4	10.1	9.6	10.6	10.9	10.5	-0.9	0.00017	0.017
BF_TUBSXXXX_0015F05_T3M.SCF	BF_TUBSXXXX_0015F05_T3M.SCF_378	NA	35.2	not assigned.unknown	NOT VALIDATED NA: NA	CAGACTCTACTTTATTAAAGCGAGATCTTTGTGCAACGAGCGGTCATCCAAAGTAATTAG	7.1	7.4	7.1	9.5	8	9.2	-1.7	0.00017	0.017
cSTA5L24TH	cSTA5L24TH_360	ABE83310	29.1	protein.aa activation	NOT VALIDATED ABE83310: tRNA synthetase, class II (D, K and N); Nucleic acid-binding, OB-fold [Medicago truncatula]	GTGTCAATATTGCAAGTTAGTGATGGTTCTTGTGTGCCCAGTGTTCAGGTTCTTGTGGAC	6.8	6.5	6.9	7.7	8.2	7.2	-1	0.00018	0.017
MICRO.1107.C2	MICRO.1107.C2_1680	Q43364	29.2.4	protein.synthesis.elongation	NOT VALIDATED Q43364: Elongation factor TuB, chloroplast precursor (EF-TuB)	CTACTGAACTTTTGGAATTTTCCCCGTCTCTTGTTTCACTTTTCATTTGCTTGAAAGAAA	8.2	8.4	8.1	9.1	9.1	9.2	-0.9	0.00018	0.017
MICRO.11150.C1	MICRO.11150.C1_316	BAC53893	26.1	misc.cytochrome P450	NOT VALIDATED BAC53893: cytochrome P450 [Petunia x hybrida]	TGGCTTGCCACTAGCATCGAGGATGATTCCAGTAATGTTGGGCTCACTCTTGAATTCATT	7.3	7.3	7.5	8.1	8.4	8.2	-0.9	0.00018	0.017
MICRO.11618.C3	MICRO.11618.C3_540	NP_001061950	29.5.11.04.02	protein.degradation.ubiquitin.E3.RING	NOT VALIDATED NP_001061950: Os08g0451800 [Oryza sativa (japonica cultivar-group)]	TGGAACATGAAGCCGGACAATACTACTATACAAACAACAACAACATGTCAATGAAACCTT	12.8	11.4	15.8	8.7	9.1	9	4.4	0.00018	0.017
MICRO.13444.C1	MICRO.13444.C1_449	NP_001057514	35.2	not assigned.unknown	NOT VALIDATED NP_001057514: Os06g0320700 [Oryza sativa (japonica cultivar-group)]	ACTATCAAACATCAAAGCCAATCCTACAATTCCAGATAACCAGTTACTGATTCCTCTGAA	8.3	8.3	8.3	7.7	7.2	7.6	0.8	0.00018	0.017
MICRO.13878.C1	MICRO.13878.C1_146	NP_176888	35.2	not assigned.unknown	NOT VALIDATED NP_176888: unknown protein [Arabidopsis thaliana]	CGATTCGAAAGGGAAGGTGAAGCCCTAATTGAAGCAAGTTCAATTTGTTCAAAGGTTCCT	8.7	8.6	8.3	7.8	6.5	7.2	1.3	0.00017	0.017
MICRO.13910.C3	MICRO.13910.C3_159	NA	35.2	not assigned.unknown	NOT VALIDATED NA: NA	AGAGTCGACTCGATACCCAAAACCTGGAAAGAGGGGTGCAGCAACGAAAGTTTTATTTGA	10.5	9.2	10.6	9	8.2	7.7	1.8	0.00017	0.017
MICRO.1448.C1	MICRO.1448.C1_733	O24031	21.02.2	redox.ascorbate and glutathione.glutathione	NOT VALIDATED O24031: Probable phospholipid hydroperoxide glutathione peroxidase (PHGPx)	CTTAAGCTCCGGAGTCTGGACTCCGCGCTGTTTCTGCATTTTGTGCTAGAAATAATGAAA	14.3	13.2	15	12.7	12.6	12.7	1.5	0.00017	0.017
MICRO.15781.C1	MICRO.15781.C1_902	NP_197360	35.1	not assigned.no ontology	NOT VALIDATED NP_197360: unknown protein [Arabidopsis thaliana]	CTTGAATTGTTATTGACTCGTTTTAGGAAGAACCAAACAATTATCCAGATTGCTTAAGCC	8	8.8	8.3	9.4	10	9.6	-1.3	0.00018	0.017
MICRO.16096.C1	MICRO.16096.C1_696	NP_671784	35.1	not assigned.no ontology	NOT VALIDATED NP_671784: N-acetyltransferase [Arabidopsis thaliana]	ACATTGCAAATGTTTTGTGTTTGCAATGTTTGGCTCGACGTCTTGGGTATTGCTTCAAAA	7.8	7.4	7.7	7.1	6.9	6.8	0.7	0.00017	0.017
MICRO.16512.C1	MICRO.16512.C1_476	CAA05329	29.4	protein.postranslational modification	NOT VALIDATED CAA05329: shaggy-like kinase 59 [Nicotiana tabacum]	TCTAGTTTGTGGGCATTCAGAAGATCAGTAGGTTCTTCCAAACAGGATTACTAGTTGAAA	12.4	11.3	13.3	10.4	10.8	10.5	1.8	0.00018	0.017
MICRO.17345.C1	MICRO.17345.C1_1007	AAG31015	35.2	not assigned.unknown	NOT VALIDATED AAG31015: tospovirus resistance protein C [Lycopersicon esculentum]	TTTAAGGACAAGAAATTGCCAAAAGGACTCTCACATCATCTCCACAGTCTTCTGATGTAC	7.2	7.4	7.5	6.7	6.7	6.6	0.7	0.00018	0.017
MICRO.1748.C2	MICRO.1748.C2_1635	ABE81799	19.1	tetrapyrrole synthesis.glu-tRNA synthetase	NOT VALIDATED ABE81799: Glutamyl-tRNA synthetase, class Ic; Glutamyl-tRNA synthetase archae/euk cytosolic; Glutathione S-transferase, C-terminal-like [Medicago truncatula]	TGAACAAAGAGCATCAAAGAATCTCAATCTAATGGAGTGGGACAAGCTATGGGCCACTAA	11.9	9.1	11.9	8.5	7.1	8.4	3	0.00017	0.017
MICRO.3312.C2	MICRO.3312.C2_775	AAX20039	35.2	not assigned.unknown	NOT VALIDATED AAX20039: tyrosine specific protein phosphatase family protein [Capsicum annuum]	CCGGTGATGCGACCTGATTTCTGGTTCTCTGACAAATATCTTTGTGTAACTTATTAGTAT	8.4	9.5	8.2	9.7	10.5	10	-1.4	0.00017	0.017
MICRO.4863.C1	MICRO.4863.C1_604	ABE92228	35.2	not assigned.unknown	NOT VALIDATED ABE92228: Tetratricopeptide-like helical [Medicago truncatula]	TTTTTTGGGACTGGATCATGGGACCACAACAAGCTTCTACAGTCATTAAAAGCGTACCAG	8.7	8.2	8.7	8.1	6.9	6.9	1.2	0.00018	0.017
MICRO.4892.C1	MICRO.4892.C1_1621	NP_001057593	35.1	not assigned.no ontology	NOT VALIDATED NP_001057593: Os06g0354700 [Oryza sativa (japonica cultivar-group)]	TTTTCATTTCTTTGTATCCACATATTGTGTGATCAATGTCCACCCATGCCTTCATGTTCG	8.8	9.6	8.2	10.7	10.6	10.7	-1.8	0.00018	0.017
MICRO.5969.C1	MICRO.5969.C1_993	ABO79406	27.3.12	RNA.regulation of transcription.C3H zinc finger family	NOT VALIDATED ABO79406: Zinc finger, CCHC-type [Medicago truncatula]	AAGTCCCGAGTTTGGATCGTCGAAACCAGACCAAGAAATCAGCTATTCCACCATCTTGTA	8.5	8.1	10	7.2	6.5	7.2	1.9	0.00017	0.017
MICRO.6922.C1	MICRO.6922.C1_121	ABA98518	35.1	not assigned.no ontology	NOT VALIDATED ABA98518: Yippee-like protein At4g27740, putative [Oryza sativa (japonica cultivar-group)]	TTTGGTCATCTGGGGTTAGTGATCAGTGAGGAATTTGTCATTGGATTTTTGTCGAATGGA	9.1	8.8	9.5	8.5	8	7.6	1.1	0.00017	0.017
MICRO.7170.C3	MICRO.7170.C3_464	NA	35.2	not assigned.unknown	NOT VALIDATED NA: NA	TTGTTGTGAGTGGCTGATTTTATGCTAGATTATATATGGAGTTTGGATGCCTGTATATGT	8.8	9.4	8.8	9.8	9.9	10.1	-0.9	0.00017	0.017
MICRO.9655.C1	MICRO.9655.C1_623	AAR29980	17.3.01.02.07	hormone metabolism.brassinosteroid.synthesis-degradation.sterols.DWF5	NOT VALIDATED AAR29980: sterol delta-7 reductase [Tropaeolum majus]	GGACTTCTAAGAATGTTTCACAATAAAGTTTGATGTGTTTTTGTAGGCTCTTCATGTTGG	10.6	11.5	10.9	12.2	11.9	12	-1	0.00016	0.017
POADZ22TV	POADZ22TV_797	NP_565492	11.3	lipid metabolism.Phospholipid synthesis	NOT VALIDATED NP_565492: diacylglycerol kinase [Arabidopsis thaliana]	TGGGCCTTTAGAATTAGCTCACATACAACAATTGTAGCATACTAGACAAATAAAGGAAAC	8.3	8.4	8.1	7.5	6.9	6.8	1.2	0.00018	0.017
SSBN001F23u.scf	SSBN001F23u.scf_288	ABI34329	35.2	not assigned.unknown	NOT VALIDATED ABI34329: Integrase core domain containing protein [Solanum demissum]	AAGATCACTTAACCAACAATGCTTGTGTGGTAGATGAAAAGGCCAAGGGAAGTGAGGCAG	6.8	6.7	6.6	7.1	8.1	8.2	-1.1	0.00018	0.017
ACDA00991C07.T3m.scf	ACDA00991C07.T3m.scf_108	NA	35.2	not assigned.unknown	NOT VALIDATED NA: NA	GTGTTTGCAAACTTCTTGAAGTTTCCAAGTTCAAATAGAACCTGAGTGAGATGCAGGACT	7.7	7.7	7.6	7.3	6.3	6.6	0.9	0.0002	0.018
BF_CSCHXXXX_0008C10.T3M.SCF	BF_CSCHXXXX_0008C10.T3M.SCF_443	NA	35.2	not assigned.unknown	NOT VALIDATED NA: NA	AGCTCAAGGAAGTTAAACTCCAAAGGGATTGGGAAAATGTCAAATTTAATCGACTTGTGA	8.3	9.2	8.5	9.6	10	9.9	-1.2	0.0002	0.018
BF_CSCHXXXX_0027B02.T3M.SCF	BF_CSCHXXXX_0027B02.T3M.SCF_462	ABE82748	35.2	not assigned.unknown	NOT VALIDATED ABE82748: CCT [Medicago truncatula]	GTAGTATGGTAGTAATGGGACTGCTGATATTAGCTTTTAGAATAGGATCTGCTCAAATAA	11.2	12.5	10.3	12.9	13.6	13.1	-1.9	0.00021	0.018
bf_cswbxxxx_0028e12.t3m.scf	bf_cswbxxxx_0028e12.t3m.scf_21	NA	35.2	not assigned.unknown	NOT VALIDATED NA: NA	TTGTTGACTTCTTCTTGTTGTCAGCATTTGCTCTGATTGTTAATTGTTCTATGCAGGCTC	6.5	6.2	6.7	6.9	8.3	8.5	-1.4	0.00021	0.018
bf_lbchxxxx_0065c11.t3m.scf	bf_lbchxxxx_0065c11.t3m.scf_169	NA	35.2	not assigned.unknown	NOT VALIDATED NA: NA	AAAGAGAGTAAATTTTAATAGTTTTTAAGAACATTTCAACAGAAATTAAATGATTTGAAA	6.3	6.9	6.7	7.6	7.8	7.2	-0.9	0.0002	0.018
bf_mxflxxxx_0014e01.t3m.scf	bf_mxflxxxx_0014e01.t3m.scf_423	NA	35.2	not assigned.unknown	NOT VALIDATED NA: NA	TAATACCATTTAGCTGATGCCTAACTATAGCTGGTTTTGGATTCAGCATCGCAGGATGAA	7.5	7.7	6.9	6.5	6.3	6.7	0.9	0.0002	0.018
bf_stolxxxx_0033D05.t3m.scf	bf_stolxxxx_0033D05.t3m.scf_499	ZP_00567828	35.2	not assigned.unknown	NOT VALIDATED ZP_00567828: Hypothetical protein Franean1DRAFT_6526 [Frankia sp. EAN1pec]	TACTATCGGCGCCACTGATTGTGGCAATTGGGGATGTTTTGGTACCAAGTGTGTTGATTT	7.2	6.2	6.9	7.5	8.3	8.5	-1.3	0.0002	0.018
BF_TUBSXXXX_0057F10_T3M.SCF	BF_TUBSXXXX_0057F10_T3M.SCF_160	NA	29.2.2	protein.synthesis.misc ribosomal protein	NOT VALIDATED NA: NA	TTATCTGTGGTATACTTCTTTTGGTTTAGCTATGTTTTAATTATCATGTTGCGAAATTCT	10.3	11.4	10.4	12	12.2	11.7	-1.3	0.00021	0.018
cSTS2G22TH	cSTS2G22TH_225	NP_194874	29.2.1.2	protein.synthesis.chloroplast/mito - plastid ribosomal protein.mitochondrial	NOT VALIDATED NP_194874: structural constituent of ribosome [Arabidopsis thaliana]	CTGCTATGTATTGACAAGGCAGGTGGTATTGATGAGTACCTGCTGAAGACACCTTACCAT	8.5	8.8	8.6	8.2	7.3	7.2	1.1	0.00021	0.018
MICRO.10197.C2	MICRO.10197.C2_814	BAF01100	35.2	not assigned.unknown	NOT VALIDATED BAF01100: hypothetical protein [Arabidopsis thaliana]	AAACCAGTTTATATGAAGATACTGAGGGCTCAATGACAATGTTGAAAATCAACAAGAGCT	7.6	7.8	7.6	6.3	6.8	7.1	0.9	0.00019	0.018
MICRO.10597.C1	MICRO.10597.C1_568	NP_174230	29.4	protein.postranslational modification	NOT VALIDATED NP_174230: unknown protein [Arabidopsis thaliana]	AGGAAGCAACACAGATAGGAGACCAACTGCCATCAGTTATGCTACTGGAAATGACAGTAA	8.7	7.7	7.9	7	6.7	7.2	1.1	0.0002	0.018
MICRO.1079.C1	MICRO.1079.C1_613	Q9XG99	13.1.7	amino acid metabolism.synthesis.histidine	NOT VALIDATED Q9XG99: Ribose-phosphate pyrophosphokinase 2, chloroplast precursor (Phosphoribosyl pyrophosphate synthetase 2)	TGATAGAAAGACGCAGGGTCGTGAATCCATTGGTGCCAAATTGGGTTGCGAACCTTATAA	7.9	7.4	8.2	6.7	6.5	7.3	1	0.00021	0.018
MICRO.1185.C3	MICRO.1185.C3_464	AAO27849	26.01	misc.misc2	NOT VALIDATED AAO27849: soluble epoxide hydrolase [Euphorbia lagascae]	TAAGTTTGTGGTAGGTGAGTTGGACCTGACATATCATATTCCTGGAATCAAGGAGTATAT	7.4	8.1	7.7	8.7	8.9	8.6	-1	0.0002	0.018
MICRO.13020.C1	MICRO.13020.C1_853	NA	35.2	not assigned.unknown	NOT VALIDATED NA: NA	AAAGGAAAAGTGTCGTGACAGAGGCAGCATTTATTAGACACAAACATTGATATTTTGCAT	8.4	9.9	7.5	11	11.7	12.2	-3.1	0.0002	0.018
MICRO.1308.C1	MICRO.1308.C1_857	NP_200619	35.2	not assigned.unknown	NOT VALIDATED NP_200619: unknown protein [Arabidopsis thaliana]	CTTGTGGTCTGGACTTGTGGACGAATGTCCCTTAGACTCGAAAGTGTTACTTCTACTCAA	15	14.5	14.9	13.9	14	14	0.9	0.00021	0.018
MICRO.15486.C1	MICRO.15486.C1_791	ABE87437	35.2	not assigned.unknown	NOT VALIDATED ABE87437: Zinc finger, BED-type predicted [Medicago truncatula]	TCCTTGATTTGTTACTTCTAATAGACGGCTTTGGAGATATTGTTTGTAGACAATATGAGG	8.4	9.2	8.1	9.8	9.5	9.6	-1.1	0.00019	0.018
MICRO.15923.C1	MICRO.15923.C1_350	NP_192425	16.2	secondary metabolism.phenylpropanoids	NOT VALIDATED NP_192425: 4-coumarate-CoA ligase/ fatty-acyl-CoA synthase [Arabidopsis thaliana]	AAGTAATGGTAAGATTTGCACTGTTTGCTCATTAGATGTTAAAAGCACATCCATCTACTG	10.5	10.8	10.1	11.3	11.5	11.3	-0.9	0.00021	0.018
MICRO.165.C8	MICRO.165.C8_1	Q9ZSK5	26.02	misc.UDP glucosyl and glucoronyl transferases	NOT VALIDATED Q9ZSK5: Zeatin O-glucosyltransferase (Trans-zeatin O-beta-D-glucosyltransferase)	GAGGCGGATGACTTTAGCAGATATCTTCCCTCAAACAACTATTCCTGACATAATTGATGA	6.2	7.3	6.8	8.7	8.7	7.4	-1.5	0.0002	0.018
MICRO.2714.C1	MICRO.2714.C1_960	ABB77236	29.3.4.99	protein.targeting.secretory pathway.unspecified	NOT VALIDATED ABB77236: patellin 1 [Cucurbita pepo]	TTACAATCATGGAGTAGACAAAGAAGGTCACCCCTGTATGTTACAATGCATTTGGTGAGT	8.7	8.2	8.5	7.8	7.2	7	1.1	0.0002	0.018
MICRO.2884.C2	MICRO.2884.C2_761	NP_174808	29.2.1.1	protein.synthesis.chloroplast/mito - plastid ribosomal protein.plastid	NOT VALIDATED NP_174808: RNA binding / structural constituent of ribosome [Arabidopsis thaliana]	TTTTGGAGGCGCATTTAACTTCATCTTTTGTTGAAATTCCATCCCATTTGTTCTTGCATG	9	9.5	9.3	10.3	10.1	10.3	-1	0.00019	0.018
MICRO.2929.C2	MICRO.2929.C2_1	NA	35.1	not assigned.no ontology	NOT VALIDATED NA: NA	GATGGATGTCACAGGCACTATCTCCTTTCTCAATTGATGCAACTATAAACATATCTGCTG	7.7	8.3	7.6	9.3	9.2	9	-1.3	0.00019	0.018
MICRO.3155.C1	MICRO.3155.C1_1188	ABB86258	27.3.26	RNA.regulation of transcription.MYB-related transcription factor family	NOT VALIDATED ABB86258: putative DNA binding protein-like [Solanum tuberosum]	TGTCATGCTTTGTGGTGTACCTATTTAATGCTAAGGGAAAGTAGTTTTCCATTGAAAATC	10	11.7	9.3	12.5	12.5	12.6	-2.2	0.00021	0.018
MICRO.3525.C1	MICRO.3525.C1_834	ABC61502	27.3.36	RNA.regulation of transcription.Argonaute	NOT VALIDATED ABC61502: AGO1-1 [Nicotiana benthamiana]	TTAAAATCACACTTCTTGATGATGATGATGGACCTGGTGGTGCTAGGCGAGAAAGGGAGT	8.1	7.9	7.4	7.3	6.5	6	1.2	0.00021	0.018
MICRO.404.C1	MICRO.404.C1_1536	NP_196713	13.1.1.2	amino acid metabolism.synthesis.central amino acid metabolism.aspartate	NOT VALIDATED NP_196713: ASP3 (ASPARTATE AMINOTRANSFERASE 3) [Arabidopsis thaliana]	CTAGTTTCCTCCTAAGTTGGAGGTTACAATAAACCTGTATCTGTAATGAGTAGAATAAAC	11.1	10.8	11	9.9	10.3	9.6	1	0.00021	0.018
MICRO.4276.C1	MICRO.4276.C1_1227	CAB85635	16.8.3	secondary metabolism.flavonoids.dihydroflavonols	NOT VALIDATED CAB85635: putative ripening-related P-450 enzyme [Vitis vinifera]	GCCTCAAAGATTCATAGAATCTAACGTGGATTATAAAGGTAGGGATTTTGAGTTTATTCC	9.3	9.4	9.3	10.4	10.1	10.9	-1.1	0.00019	0.018
MICRO.640.C2	MICRO.640.C2_313	NP_851141	27.4	RNA.RNA binding	NOT VALIDATED NP_851141: RNA binding / nucleic acid binding [Arabidopsis thaliana]	TGCACTCCACTACCTTCTTTATATCTTAAAATCTCAACTGAGTGCTCTATCTTGCAGTCC	8.8	8.6	8.2	7.9	7	7.5	1	0.00021	0.018
MICRO.6452.C2	MICRO.6452.C2_543	NA	35.1	not assigned.no ontology	NOT VALIDATED NA: NA	TCTTCTTGTTTTGAGTTGGTCTCGGGTTATATTCTATTAGCATGAACCGAGACTAACATT	11.1	10.5	12.3	9.4	9.5	9.2	1.9	0.00019	0.018
MICRO.6490.C2	MICRO.6490.C2_772	AAM20133	35.2	not assigned.unknown	NOT VALIDATED AAM20133: unknown protein [Arabidopsis thaliana]	ATTCTTCATGCTCTGCACAAGTCAGAATAAATGTTGACATGTACCATACTGATGATACAT	12.7	12.7	12.9	13.7	13.6	13.3	-0.8	0.00021	0.018
MICRO.6879.C2	MICRO.6879.C2_588	BAB63464	30.3	signalling.calcium	NOT VALIDATED BAB63464: calcium dependent protein kinase [Solanum tuberosum]	GCTTCATTTTCCTTCTAAATGTTAGCCTTTGTGCTGATTTTAATTTTGGATCGTTCCAAG	8.1	7.9	8	8.5	9	9.2	-0.9	0.0002	0.018
MICRO.7911.C1	MICRO.7911.C1_981	ABD93543	27.3.06	RNA.regulation of transcription.bHLH,Basic Helix-Loop-Helix family	NOT VALIDATED ABD93543: DNA-binding protein [Nicotiana tomentosiformis]	TTGTCTGTCGAGTATCGAGGTAGTATCAGTTGAGATCAACCATACCATAACAGTGTTAGA	10.8	10.5	10.8	9.9	9.6	9.7	1	0.00019	0.018
MICRO.8084.C1	MICRO.8084.C1_892	NP_178230	30.2.3	signalling.receptor kinases.leucine rich repeat III	NOT VALIDATED NP_178230: ATP binding / kinase/ protein serine/threonine kinase [Arabidopsis thaliana]	GACATCAAAATATTGTGACTCTTCGTGCCTATTATTGGTCTGTCGACGAGAAGCTACTGA	6.8	7.2	6.8	7.8	7.6	8	-0.9	0.0002	0.018
MICRO.839.C6	MICRO.839.C6_701	AAF15901	20.1.07.06	stress.biotic.PR-proteins.proteinase inhibitors	NOT VALIDATED AAF15901: putative proteinase inhibitor [Nicotiana glutinosa]	ATAACCTAGCTCGATCGCTTTTTCTAAAATAATGTGGATCATGCTTCTATTCACTCTATG	14	15	12.8	15.9	16	15.8	-2	0.00019	0.018
MICRO.8888.C1	MICRO.8888.C1_718	NP_566900	35.2	not assigned.unknown	NOT VALIDATED NP_566900: unknown protein [Arabidopsis thaliana]	CTATGAAAGAAAAGTTTCAGCAGCAGTACCCATGGAACATTTCCTGATTGGCATCTCGCG	7.5	7.6	7.4	6.8	6.9	6.8	0.7	0.00021	0.018
MICRO.98.C8	MICRO.98.C8_1133	ABJ91234	29.4	protein.postranslational modification	NOT VALIDATED ABJ91234: CBL-interacting protein kinase 6 [Populus trichocarpa]	ACATCGAAATGCTCTGCCTCAACAATCATGTCAAAACTGGAATCTTTAGCCAAGAAGGTG	13.8	12.5	14.4	11.8	10.6	10.8	2.5	0.00021	0.018
MICRO.9958.C2	MICRO.9958.C2_359	BAD95793	35.2	not assigned.unknown	NOT VALIDATED BAD95793: hypothetical protein [Solanum lycopersicum]	ATAAGTGGCATAAGAGGGAAAAGAAGAAAGGTGGATTCATGAGAGGTATTCGTAAGTTCC	12.7	12.8	12.7	13.4	13.5	13.4	-0.7	0.00021	0.018
POADY25TV	POADY25TV_619	ABC01898	34.9	transport.metabolite transporters at the mitochondrial membrane	NOT VALIDATED ABC01898: mitochondrial carrier-like protein [Solanum tuberosum]	CAGGTTATTTTCTGTACTTATTAATTTACTGGGAGCAGCGAGGAAGTTATTTACTGGTAA	8.4	7.3	8	6.8	6.5	6.6	1.3	0.0002	0.018
POCBN65TP	POCBN65TP_653	NA	35.2	not assigned.unknown	NOT VALIDATED NA: NA	TATCAAGGCGGTTCGAACGAACCCCTCGGTCCTATCTATCTTCACCATTGGTATATATCT	6.5	6.5	6.7	6.9	8.1	8.2	-1.2	0.00019	0.018
POCD924TP	POCD924TP_553	NP_200392	35.1	not assigned.no ontology	NOT VALIDATED NP_200392: nicotinamide-nucleotide adenylyltransferase/ nucleotidyltransferase [Arabidopsis thaliana]	CACCAGCAAAATAATCCCCAAAACCTCCCCTTTCAGTATGAATAATAAGGTCCTACTTGG	7.2	7.4	7.3	6.4	6.6	6.8	0.7	0.00019	0.018
PPCBW28TH	PPCBW28TH_621	P26575	1.03.02	PS.calvin cyle.rubisco small subunit	NOT VALIDATED P26575: Ribulose bisphosphate carboxylase small chain 2A, chloroplast precursor (RuBisCO small subunit 2A)	AGGCATGGATCCGTATCATTGGATTCGACACGTTCGTCAAGTGCAGTGTATCAGTTTCAT	7.3	7	7.2	8.9	8.5	9.5	-1.8	0.00021	0.018
SDBN003I07u.scf	SDBN003I07u.scf_290	NP_001051684	29.2.1.1	protein.synthesis.chloroplast/mito - plastid ribosomal protein.plastid	NOT VALIDATED NP_001051684: Os03g0815400 [Oryza sativa (japonica cultivar-group)]	TGGTGGTTCACCAATTATTCCATCCCAATTTCCTGTATGCCGTTCAATTTTAATTTGCAA	9.2	9.1	9.2	10.3	9.8	10.2	-0.9	0.00019	0.018
SDBN006J20u.scf	SDBN006J20u.scf_692	NP_178257	35.1	not assigned.no ontology	NOT VALIDATED NP_178257: unknown protein [Arabidopsis thaliana]	GAGAGGAATGGAAGGGAAAATTTACAAAACCTGGTCGTGTGATTCGTCCTGGAGCTATCA	8.9	8.1	8.3	7.3	6.6	7.4	1.4	0.0002	0.018
137E10AF.esd	137E10AF.esd_1	AAG22607	17.1.1	hormone metabolism.abscisic acid.synthesis-degradation	NOT VALIDATED AAG22607: aldehyde oxidase [Lycopersicon esculentum]	GCTGAGGGCTATGGACAAGGTTAGACAGATGACTGCCTATGCTCTTGGTTTAATTGATAG	8.5	8.7	8.3	10.2	10	10.4	-1.7	0.00022	0.019
ACDA00897C09.T3m.scf	ACDA00897C09.T3m.scf_61	NA	35.2	not assigned.unknown	NOT VALIDATED NA: NA	GGTTCATCTAGGTACATTTTGGACCAGCATATCTTCGAAGATAGAACTACTCAAGCATCC	12.4	13.3	11.3	14.5	14.5	14.9	-2.3	0.00023	0.019
BF_CSCHXXXX_0016D05.T3M.SCF	BF_CSCHXXXX_0016D05.T3M.SCF_324	NP_193014	35.1	not assigned.no ontology	NOT VALIDATED NP_193014: unknown protein [Arabidopsis thaliana]	GTTCTAATAGTTGTGCAAATCAGCTCGACTTTACTGTTTTGGTGGACTGACACGATACTT	9.4	10.6	9.7	10.8	11.2	11	-1.1	0.00024	0.019
BF_CSCHXXXX_0042C07.T3M.SCF	BF_CSCHXXXX_0042C07.T3M.SCF_311	O24383	20.1.07.06	stress.biotic.PR-proteins.proteinase inhibitors	NOT VALIDATED O24383: Cysteine protease inhibitor 10 precursor (PCPI-10) (Pcpi10)	TAACTGGTGGTAACGTAGAATGAAAACGACATCTCAATCAAGAAACTGACTTGGTGATAC	13.5	14.1	12.3	14.8	14.9	14.8	-1.5	0.00024	0.019
bf_ivrootxx_0011a07.t3m.scf	bf_ivrootxx_0011a07.t3m.scf_212	NA	29.5.03	protein.degradation.cysteine protease	NOT VALIDATED NA: NA	AGTGGGTGAAATGGATACTTCAAGATCAGAGAGGAACAAATGAGTGTGGCATTGAACCAT	13.5	13.2	12.7	12.2	12.3	12	0.9	0.00024	0.019
bf_mxflxxxx_0012h09.t3m.scf	bf_mxflxxxx_0012h09.t3m.scf_206	P52578	16.8.5	secondary metabolism.flavonoids.isoflavonoids	NOT VALIDATED P52578: Isoflavone reductase homolog (CP100)	CCAGTATGTGTGAATATTTGGACTTCCTTCCGATTAAGGAGCTTATTCCTAGCTTTCTAT	6.3	6.3	6.6	7.1	7.1	8.1	-1	0.00024	0.019
bf_mxflxxxx_0068b01.t3m.scf	bf_mxflxxxx_0068b01.t3m.scf_1	NP_001050071	9.5	mitochondrial electron transport / ATP synthesis.cytochrome c reductase	NOT VALIDATED NP_001050071: Os03g0341300 [Oryza sativa (japonica cultivar-group)]	GACTCACATTGGTCGGATTTTTATGCGCTTGCTTTGAATATTGGCATGTATGCAGCTCCT	7.8	8	6.9	8.9	9	8.8	-1.4	0.00024	0.019
bf_mxlfxxxx_0017c11.t3m.scf	bf_mxlfxxxx_0017c11.t3m.scf_423	NA	35.1	not assigned.no ontology	NOT VALIDATED NA: NA	CCTTTGTGTTTTATACGTGCTTGCCATGAAGGAGGACATGCACTGATGTATTTGGTTGTA	7.5	7.8	7.6	6.8	6.5	6.9	0.9	0.00023	0.019
bf_stolxxxx_0058h06.t3m.scf	bf_stolxxxx_0058h06.t3m.scf_146	NP_564720	35.2	not assigned.unknown	NOT VALIDATED NP_564720: unknown protein [Arabidopsis thaliana]	TCCAAAATATGTTAAAATGTGGCTATGTTAAAAAACACTGGCTTGGTTGGGCTCAAATCC	6.8	6.8	6.8	7.2	8	8	-0.9	0.00023	0.019
BF_TUBSXXXX_0031C04_T3M.SCF	BF_TUBSXXXX_0031C04_T3M.SCF_41	NA	35.2	not assigned.unknown	NOT VALIDATED NA: NA	TGGGACAGAGGGAGTATCTTTTAGGATGTCGTATGTTGCTTTATAGCTTATTATGTTAAT	6.5	6.4	6.5	6.9	8.4	8.2	-1.3	0.00024	0.019
cSTB45O9TH	cSTB45O9TH_21	CAE00640	30.6	signalling.MAP kinases	NOT VALIDATED CAE00640: putative mitogen-activated protein kinase 1 [Medicago sativa]	TCTGGTTAATCCTGCCTAGGAAATTTTGTCGTTTACTTCACCCCATTCAGTTTGCCATAT	7.6	7.8	7.4	6.7	6.7	6.8	0.9	0.00023	0.019
cSTE26M21TH	cSTE26M21TH_705	NP_176936	35.1	not assigned.no ontology	NOT VALIDATED NP_176936: unknown protein [Arabidopsis thaliana]	TGTTCAAATTGCATATGTACAACAGATTCTAGGGAAAACACCAAGAGCCGCTGCATCTTA	8.6	8	8	7.2	6.8	6.7	1.3	0.00022	0.019
cSTS8A9TH	cSTS8A9TH_700	ABE83426	20.2.3	stress.abiotic.drought/salt	NOT VALIDATED ABE83426: BURP [Medicago truncatula]	CTCCAGAGGTGCAAACATATACCATCGAAAAAGTTGGAAGAGAAAAGCAATGGCAAAGGG	6.8	6.9	6.9	9.5	9.4	8.2	-2.2	0.00022	0.019
MICRO.10077.C1	MICRO.10077.C1_357	Q41253	30.5	signalling.G-proteins	NOT VALIDATED Q41253: Rac-like GTP-binding protein RAC13 precursor	TGCGACCCCCTAAGATGAAGAAAAGGCCCCAAAAAAGAAGGACGTTATGTGCAATACTTT	10.1	9	10.5	8.4	8.7	8.3	1.4	0.00022	0.019
MICRO.10978.C1	MICRO.10978.C1_870	AAV65493	20.2.1	stress.abiotic.heat	NOT VALIDATED AAV65493: calmodulin-binding heat shock protein [Gossypium hirsutum]	TTTTCATCTGGTATACTTTCACCAGGTAGTTGGTGTTAGCATATTGTCTTGGAACACAGT	7.5	7.3	7.8	6.9	6.4	6.7	0.9	0.00024	0.019
MICRO.11129.C1	MICRO.11129.C1_402	EAZ22671	33.99	development.unspecified	NOT VALIDATED EAZ22671: hypothetical protein OsJ_006154 [Oryza sativa (japonica cultivar-group)]	GGGAACTTAGAAGTCTTGGAGGCAAATTAGGGTAATGTAAAGTTAAGTAGATCCTGTTCT	10.6	10.1	10.6	9.7	9.7	9.7	0.7	0.00022	0.019
MICRO.11532.C1	MICRO.11532.C1_599	EAZ42254	35.1.19	not assigned.no ontology.C2 domain-containing protein	NOT VALIDATED EAZ42254: hypothetical protein OsJ_025737 [Oryza sativa (japonica cultivar-group)]	TTTTAGCCTCGGCTATATGACAATTTTTCATTCGTTAAAGTGTGTGACCATCTAAGCACA	6.7	6.8	6.9	7.5	8.5	7.8	-1.1	0.00021	0.019
MICRO.1180.C2	MICRO.1180.C2_108	NP_193830	29.2.3	protein.synthesis.initiation	NOT VALIDATED NP_193830: translation initiation factor [Arabidopsis thaliana]	CTTGAATGAGTTTGATCCTAAGTACTCTGGTGTTGATGGAGGCAGAAGCTGGAGACACAA	10.8	10.1	10.9	9.4	9.4	9.1	1.3	0.00024	0.019
MICRO.12028.C1	MICRO.12028.C1_87	NA	35.2	not assigned.unknown	NOT VALIDATED NA: NA	ATATTATTAGTGGTTTCATTTGGTTCATGGATATTGATATCCTTAGGGTTATTGGGGGTG	7.4	6.7	7.3	7.9	8.2	8	-0.9	0.00023	0.019
MICRO.12940.C1	MICRO.12940.C1_577	ABE83063	35.2	not assigned.unknown	NOT VALIDATED ABE83063: conserved hypothetical protein [Medicago truncatula]	CGTGTTGATCGTCTACTCTCTTCTCTGTCTGTAACATCAATCAATATGCATGTTTCATCA	7.4	8	7.4	8.8	8.9	9	-1.3	0.00022	0.019
MICRO.13005.C2	MICRO.13005.C2_1148	ABC70464	35.2	not assigned.unknown	NOT VALIDATED ABC70464: CASTOR protein [Glycine max]	CTGTAATGCAGAAAAACATTGATGTATCATTTCTTGGGCCATCTTTTGAGCATGCTTCAA	7.4	7.4	7.5	8	8.5	8.2	-0.8	0.00025	0.019
MICRO.14776.C1	MICRO.14776.C1_1097	BAB17667	35.1	not assigned.no ontology	NOT VALIDATED BAB17667: PEX14 [Arabidopsis thaliana]	AACAGCTGAAGTTTCTCTTGTTCTACCTATCCTAAGGTTTGCTTTTTTGGTTTTGAGGTG	8.1	8.7	8	9.2	9.4	9.2	-1	0.00022	0.019
MICRO.14863.C1	MICRO.14863.C1_675	NP_176788	27.3.11	RNA.regulation of transcription.C2H2 zinc finger family	NOT VALIDATED NP_176788: ZFP4 (ZINC FINGER PROTEIN 4); nucleic acid binding / transcription factor/ zinc ion binding [Arabidopsis thaliana]	ATACATTGAGGATATCGATGAGGCTGATCACTTATTATGGCCTGGCAGTTTTCGTCAAGT	8.2	8.7	8.1	9.4	9.1	9.3	-0.9	0.00024	0.019
MICRO.1524.C3	MICRO.1524.C3_101	NA	35.2	not assigned.unknown	NOT VALIDATED NA: NA	CACAAAGTGATGCAAAAAGTAAGCAGCACCAACTGCTTATTACTTGTGTTGGGCAGATGA	7.5	7.1	7.1	6.3	6.4	6.7	0.8	0.00024	0.019
MICRO.15519.C1	MICRO.15519.C1_161	AAF81309	35.1	not assigned.no ontology	NOT VALIDATED AAF81309: Contains a weak similarity to a farnesylated protein GMFP5 mRNA from Glycine max gb|U64916. ESTs gb|AI993148, gb|T44360 come from this gene. [Arabidopsis thaliana]	TCTTTAATTTCACCCATGAAGAAACTTATTCTGATCAAACTGGATTTACAAGATGCCAGG	9.6	9	9.1	8.2	6.8	8.3	1.5	0.00024	0.019
MICRO.1689.C1	MICRO.1689.C1_820	P30924	2.1.2.03	major CHO metabolism.synthesis.starch.starch branching	NOT VALIDATED P30924: 1,4-alpha-glucan branching enzyme (Starch branching enzyme) (Q-enzyme)	TTGAACACCATCATCACAGGCATTTCGATTCATGTTCTTACTAGTCTTGTATGTAAGACA	8.1	9.4	7.4	10.8	11.4	10.1	-2.5	0.00024	0.019
MICRO.1751.C32	MICRO.1751.C32_9	AAM10743	20.1.07.06	stress.biotic.PR-proteins.proteinase inhibitors	NOT VALIDATED AAM10743: putative kunitz-type proteinase inhibitor precursor P1H5 [Solanum tuberosum]	TAATACATGGCAAGGAATATGAGAGTGTGATGAGTCTATAAATAGAAGGCTTCATTAGTG	8.4	8	7.8	9.7	9.2	10	-1.5	0.00021	0.019
MICRO.18097.C1	MICRO.18097.C1_185	NP_849603	35.2	not assigned.unknown	NOT VALIDATED NP_849603: triacylglycerol lipase [Arabidopsis thaliana]	AGACAAAGATGGACGTTGGCTTCAACCTGAACGTCCTAGACTTGATGATCATCCTCATGA	8	8	9.2	7.4	7.1	7.1	1.2	0.00022	0.019
MICRO.1823.C4	MICRO.1823.C4_205	AAP03873	1.01.02.02	PS.lightreaction.photosystem I.PSI polypeptide subunits	NOT VALIDATED AAP03873: photosystem I reaction center subunit X psaK [Nicotiana tabacum]	GTTGTGATTTCATTGGCTCATCCACTAATTTGATAATGGTGACATCAACAAGCCTAATGT	9.4	8.9	9	11	10.2	12.1	-2	0.00024	0.019
MICRO.3206.C1	MICRO.3206.C1_779	AAP03872	1.01.02.02	PS.lightreaction.photosystem I.PSI polypeptide subunits	NOT VALIDATED AAP03872: putative photosystem I subunit III precursor [Nicotiana tabacum]	TCTCTTGTTGGAGACTCGTGGAATTATACTTTCACTTGTTTATATCCATGAAAGATTGTG	11	11.5	9.5	12.9	12.4	12.6	-1.9	0.00022	0.019
MICRO.4514.C1	MICRO.4514.C1_2627	CAA65268	17.7.1.2	hormone metabolism.jasmonate.synthesis-degradation.lipoxygenase	NOT VALIDATED CAA65268: 13-lipoxygenase [Solanum tuberosum]	GAAATGGAGCTGGAGTTATGCCTTATGAATTGTTGAAACCATATTCTGAACCTGGAGTTA	9.6	11	8.7	11.6	12	11.9	-2.1	0.00022	0.019
MICRO.52.C1	MICRO.52.C1_1158	NP_565768	35.2	not assigned.unknown	NOT VALIDATED NP_565768: unknown protein [Arabidopsis thaliana]	CAACAATACTCAGTTCACCATTGAGCAAAATGCCATGTCCAGCATCCTCTGCTTGAACGA	7.2	7.8	7.5	6.9	6.8	6.4	0.8	0.00023	0.019
MICRO.5709.C1	MICRO.5709.C1_743	ABG37639	17.2.2	hormone metabolism.auxin.signal transduction	NOT VALIDATED ABG37639: putative auxin-resistance protein [Populus trichocarpa]	CAAAGATTTGATTAAATCCAAGATGATCACGGTGGATGAAGAAACTATAAAGAACCATGG	8.1	7.9	8	7.3	6.8	6.5	1.1	0.00023	0.019
MICRO.5733.C2	MICRO.5733.C2_803	NP_001051665	30.5	signalling.G-proteins	NOT VALIDATED NP_001051665: Os03g0810600 [Oryza sativa (japonica cultivar-group)]	TTCTGTGAAAACAATTCTGGGAATAGTTGCTCCTCTGGATTAGTTTTTCTGGAAATCTGC	9.8	10.5	9.4	10.8	11.2	11	-1.1	0.00023	0.019
MICRO.6120.C1	MICRO.6120.C1_284	NA	35.2	not assigned.unknown	NOT VALIDATED NA: NA	AGGTCGACATACAAGTTACCGACGAACTTGAATCCTGTTTCGAAGAAGTCGACGACGATT	8.7	8	8.6	7.3	7.7	6.9	1.1	0.00021	0.019
MICRO.6360.C1	MICRO.6360.C1_327	NA	35.2	not assigned.unknown	NOT VALIDATED NA: NA	AGAATGATTTATAGATTTTTGTAGATTTAGTTTGATTAAATTATGTACATTTAAACTGGG	6.8	6.8	6.7	7.1	8.3	8.2	-1.1	0.00025	0.019
MICRO.7571.C3	MICRO.7571.C3_985	NP_191867	21.02.2	redox.ascorbate and glutathione.glutathione	NOT VALIDATED NP_191867: ATGPX5 (GLUTATHIONE PEROXIDASE 5); glutathione peroxidase [Arabidopsis thaliana]	AGGTCCTGGTGGAGGCAAAGGAGTAAGTGGCAAAAATTGACATGCATTGTTCACAAGTGA	7.3	8	7.6	6.7	6.6	6.7	1	0.00024	0.019
MICRO.8031.C2	MICRO.8031.C2_101	NP_181234	26.02	misc.UDP glucosyl and glucoronyl transferases	NOT VALIDATED NP_181234: UDP-glycosyltransferase/ transferase, transferring glycosyl groups [Arabidopsis thaliana]	ATCAAATCAAGTGACTTGCCATCCTTGGTTCCAAAATTCAGTGGTGCACCAATTAATCTA	7.3	6.9	7.3	7.9	8	8.5	-1	0.00022	0.019
MICRO.9133.C1	MICRO.9133.C1_480	CAA43841	1.01.02.02	PS.lightreaction.photosystem I.PSI polypeptide subunits	NOT VALIDATED CAA43841: photosystem I psaH protein [Nicotiana sylvestris]	AAGATCTAATTGCTTTTCGACCCAATTCTCAACTTTCAATGTAATTGATGTATGTGCTCC	10.9	10.7	10.5	12.3	11.3	12.3	-1.3	0.00024	0.019
MICRO.9315.C1	MICRO.9315.C1_1197	AAU89741	35.2	not assigned.unknown	NOT VALIDATED AAU89741: hypothetical protein [Solanum tuberosum]	CACAAATTTCCTCTTGGCATATACCACCTGATATGTCAAGAAATTAGTTTGGATGATAAG	12.9	11.9	12.8	11.6	10.2	10	1.9	0.00022	0.019
MICRO.9481.C1	MICRO.9481.C1_1506	NP_565298	29.5.04	protein.degradation.aspartate protease	NOT VALIDATED NP_565298: aspartic-type endopeptidase/ pepsin A [Arabidopsis thaliana]	TATGTGCACATATCCTAAAATCCTAGCTCCGCCTATGTACGCTTCAAATTGTTCGTTTAT	6.7	6.5	6.8	7.2	7.5	8.3	-1	0.00024	0.019
MICRO.9783.C1	MICRO.9783.C1_256	NA	35.2	not assigned.unknown	NOT VALIDATED NA: NA	AAGATTATTTTTTCTTGGAAGTTGTGGTGGTGTAGGACTAGATGTTATGGTATTGAGTTG	9.4	9.5	10.9	8.3	8.4	8.6	1.5	0.00022	0.019
MICRO.984.C2	MICRO.984.C2_3132	P04045	2.2.2.02	major CHO metabolism.degradation.starch.starch phosphorylase	NOT VALIDATED P04045: Alpha-1,4 glucan phosphorylase L-1 isozyme, chloroplast precursor (Starch phosphorylase L-1)	CCACATAATAAGAGATGAAGAGTCTCATTTTCTGCTTCTCCTTGATTTAATGTTTTGGTG	14	14.7	13.3	15.7	15.7	15.1	-1.5	0.00023	0.019
POADO10TV	POADO10TV_800	AAO23981	34.1	transport.p- and v-ATPases	NOT VALIDATED AAO23981: vacuolar H+-ATPase A2 subunit isoform; V-ATPase A2 subunit isoform [Lycopersicon esculentum]	GTATGTAGCGCACTGGTCTTCGTTTTGTTGTTATCAGATGTGCAATAACTTGTAATAAAG	9	9.8	9	10.2	10.5	10.6	-1.2	0.00023	0.019
STMCU87TV	STMCU87TV_163	NA	35.2	not assigned.unknown	NOT VALIDATED NA: NA	AAGGGGTATTCCTTTTCCTCAACTTACTGCTGCATTGCCCATCATCTTTTTTCAAGTAAT	7	7.4	7.9	6.5	6.6	6.6	0.9	0.00023	0.019
STMEN44TV	STMEN44TV_116	NA	35.2	not assigned.unknown	NOT VALIDATED NA: NA	TCCCCCAGAAAAATGAATCAGTGTTGCACTGTTGTTGAGTTGAATTTCCTCATTTGCAAC	7.6	7.7	7.9	6.9	6.7	7	0.8	0.00022	0.019
TBSK01496FE08.t3m.scf	TBSK01496FE08.t3m.scf_51	NA	35.2	not assigned.unknown	NOT VALIDATED NA: NA	TTGACCATTTTAATTTTTATGATATTAGCACTACTAGTTCAACATAATGCTACGTTGGGA	9.2	10.2	8.2	11.2	11.6	11.4	-2.2	0.00022	0.019
TBSK02083FF07.t3m.scf	TBSK02083FF07.t3m.scf_368	AAA69780	20.1.07.06	stress.biotic.PR-proteins.proteinase inhibitors	NOT VALIDATED AAA69780: proteinase inhibitor I	TTAAGCAGACCACATGTCATATCATAATTAGGGTTCATGTCTGTTCATTACAATGTCTTC	10.9	12	10.5	12.8	13.4	12.4	-1.8	0.00023	0.019
TBSK04461FD09.t3m.scf	TBSK04461FD09.t3m.scf_248	AAZ94199	35.2	not assigned.unknown	NOT VALIDATED AAZ94199: Kunitz-type protease inhibitor precursor [Solanum tuberosum]	TTGTGCAAGGACAATGCCTCCTTTGATGGTCTCCTTCAAGCCAAGTCCCAGTAATAACAA	13.2	14.3	12.2	15	15.2	15.4	-2	0.00022	0.019
ACDA00256F04.T3m.scf	ACDA00256F04.T3m.scf_253	NA	35.2	not assigned.unknown	NOT VALIDATED NA: NA	GAATTATTATCATCAAACTTATAATGATGAAGTTAAGGACGACGGAGGATTATTGCGCTG	7.1	6.5	6.9	8	7.5	7.8	-0.9	0.00026	0.02
ACDA01006D10.T3m.scf	ACDA01006D10.T3m.scf_56	NA	35.2	not assigned.unknown	NOT VALIDATED NA: NA	AGATTGGTGAAAATTTCTTGAAGCAAACCAGTGTCCAAAGACAATCCTGAAACCTATGAG	10.1	11.5	9.3	12.5	12.9	11.7	-2.1	0.00025	0.02
bf_ivrootxx_0034d10.t3m.scf	bf_ivrootxx_0034d10.t3m.scf_505	ABE93659	29.2.3	protein.synthesis.initiation	NOT VALIDATED ABE93659: Translation initiation factor IF5; eIF4-gamma/eIF5/eIF2-epsilon [Medicago truncatula]	AGTGCTGAGTCCGAGTCCGAGAGGACTGAGATCACAACTGTCGTTCCTTTATTTAGAATT	12.7	11.4	12.5	10.8	11.1	11.1	1.2	0.00028	0.02
bf_mxflxxxx_0030e07.t3m.scf	bf_mxflxxxx_0030e07.t3m.scf_508	NP_001051963	35.2	not assigned.unknown	NOT VALIDATED NP_001051963: Os03g0858700 [Oryza sativa (japonica cultivar-group)]	ACCAATATTATTTCTGGGCAACATGTTAGCATTTGACACCAACTGGTTAATGGTGAAGCA	6.7	6.5	6.3	7.2	8	7.1	-0.9	0.00028	0.02
bf_mxlfxxxx_0004c10.t3m.scf	bf_mxlfxxxx_0004c10.t3m.scf_247	NA	35.2	not assigned.unknown	NOT VALIDATED NA: NA	ATCATGTACCTTTGCTGGTGGGAAGTAACAGACACTCAGTGGAACACATTGTATGTTGAT	7.4	8.4	7.8	6.8	6.6	6.7	1.2	0.00027	0.02
bf_stolxxxx_0043e04.t3m.scf	bf_stolxxxx_0043e04.t3m.scf_567	AAZ85394	23.4.10	nucleotide metabolism.phosphotransfer and pyrophosphatases.nucleoside diphosphate kinase	NOT VALIDATED AAZ85394: cytosolic nucleoside diphosphate kinase [Solanum chacoense]	TCGTATGAGTTCAGAAGTTTGGGATTTGAGACTTGATGCCTGTGATATTTGATCCTTGAG	7.2	6.9	7.5	6.3	6.2	6.6	0.8	0.00026	0.02
BPLI15D8TH	BPLI15D8TH_308	P25469	28.1.3	DNA.synthesis/chromatin structure.histone	NOT VALIDATED P25469: Histone H2A.1 (LeH2A-1)	TCTCAGATCCGTATTTTTCTGTTGAATATGGAGATAGTGATGTTGTATTGATTTATGGGG	6.1	6.3	6.4	6.8	8	7.2	-1.1	0.00025	0.02
MICRO.101.C2	MICRO.101.C2_1868	NP_191004	29.5.11.04.02	protein.degradation.ubiquitin.E3.RING	NOT VALIDATED NP_191004: ubiquitin-protein ligase/ zinc ion binding [Arabidopsis thaliana]	TGAGTTACTATGTAACAATCACAGTGGACCAGTAAGAATCTGGTGTTGACATGATTCGGG	9.7	11	9	11.9	11.9	11.7	-2	0.00025	0.02
MICRO.10619.C3	MICRO.10619.C3_719	NP_001030758	26.07	misc.oxidases - copper, flavone etc.	NOT VALIDATED NP_001030758: monooxygenase/ oxidoreductase [Arabidopsis thaliana]	TTAAGCTATTTTCTGGCAAATTACTCAGAATCTAAGTCCCCTTTATGTTCGAATTCAGAC	7.4	7.1	7.5	6.5	6.5	6.7	0.8	0.00026	0.02
MICRO.10663.C1	MICRO.10663.C1_970	EAZ10449	30.2.20	signalling.receptor kinases.wheat LRK10 like	NOT VALIDATED EAZ10449: hypothetical protein OsJ_000274 [Oryza sativa (japonica cultivar-group)]	GTACACCAGGCTACGTTGATCCTGAATACTACCAATGTTACCAGCTCACTGAAAGAGTGA	8.4	8	9.3	7	7.1	6.9	1.6	0.00026	0.02
MICRO.12247.C1	MICRO.12247.C1_735	C86258	35.1	not assigned.no ontology	NOT VALIDATED C86258: protein F5O11.8 [imported] - Arabidopsis thaliana	CCCTCGAAATTCTGATGATGGATATTCTAGTGATCCATCCTGAGGCATGCATTCAGCGAT	9.5	9	9.6	8.4	8.1	8.8	0.9	0.00027	0.02
MICRO.1453.C2	MICRO.1453.C2_1158	AAG35472	19.1	tetrapyrrole synthesis.magnesium chelatase	NOT VALIDATED AAG35472: sulfur [Nicotiana tabacum]	TGTCGATGGATTGAGAGGTGATATAGTCACTAACAGAGCAGCAAAAGCATTGGCTGCACT	9.6	10.3	9	10.9	10.7	11.1	-1.3	0.00026	0.02
MICRO.15024.C1	MICRO.15024.C1_674	NP_001066020	35.2	not assigned.unknown	NOT VALIDATED NP_001066020: Os12g0120500 [Oryza sativa (japonica cultivar-group)]	TTGATTAGCGACGATGTTTTTAGCTTGGTCGTGCAACCAGGATTTGAACCTCACATTTTT	10.4	9.2	11.3	7.7	7	8.2	2.7	0.00027	0.02
MICRO.15525.C1	MICRO.15525.C1_953	AAX28838	34.12	transport.metal	NOT VALIDATED AAX28838: zinc transporter protein ZIP2 [Fragaria x ananassa]	GGAGCTGCTTGTATGTCATTATTGGCAAAATGGGGTGGCACATAATTTCAATAGATAAAT	8.4	10.1	7.8	11	11.1	11.2	-2.4	0.00027	0.02
MICRO.16063.C1	MICRO.16063.C1_545	NP_566309	35.2	not assigned.unknown	NOT VALIDATED NP_566309: unknown protein [Arabidopsis thaliana]	ATATGGGAACTTTTGGTTCTGGATAATGTCTTCCTCTTTTATTCAGTATGTTTTAGCCAC	8.9	9.5	9	10	10.1	10.2	-0.9	0.00026	0.02
MICRO.16164.C1	MICRO.16164.C1_227	NA	35.2	not assigned.unknown	NOT VALIDATED NA: NA	ATATGATGTGTCCCCCACACACTATACGTGAATTAAATTTTCATTGTCCCTCCTCACTTC	7.8	9.4	8.7	10.5	11	10.2	-1.9	0.00025	0.02
MICRO.16396.C1	MICRO.16396.C1_887	NP_193090	35.2	not assigned.unknown	NOT VALIDATED NP_193090: unknown protein [Arabidopsis thaliana]	AGTGGTAGTCCTCTAGATTGTATGTTTCTTTCATGTCATTTCTTTGTTGTTTGTGAAGTG	6.9	8	7.1	8.2	9.4	9.3	-1.7	0.00026	0.02
MICRO.16853.C2	MICRO.16853.C2_148	CAA06000	35.2	not assigned.unknown	NOT VALIDATED CAA06000: extensin-like protein [Solanum tuberosum]	AAGAGAAGTCGTTGTGAACATGAACGATAACATGAACGACTTAATTCCATGTTGGCCAAT	7.3	8.2	7.2	6.5	6.4	6.7	1	0.00026	0.02
MICRO.17765.C1	MICRO.17765.C1_382	NA	35.2	not assigned.unknown	NOT VALIDATED NA: NA	TCAATAGCAAAAAGGATCGTCAGACTTGTTTGGGATTGAGGGCGTAATTGTTGTTACTTT	15.2	10.3	15.9	8.6	7.2	8.6	5.6	0.00025	0.02
MICRO.2055.C2	MICRO.2055.C2_122	AAZ05072	35.1	not assigned.no ontology	NOT VALIDATED AAZ05072: hypoxia-responsive family protein [Citrus sinensis]	TATGAAAACTAGCGTTAAGATCATTCATGCCAGATTTAGGGCTACTGGATACGGGAGCTG	12.8	10	13	9.5	7.2	9.2	3.3	0.00028	0.02
MICRO.2213.C2	MICRO.2213.C2_1214	ABO79008	35.1	not assigned.no ontology	NOT VALIDATED ABO79008: BURP [Medicago truncatula]	GAGCAGTCTCTCCATGTTGATAGCAGCTCTTGTTGGCTTCTGTTTTACTACTACCTGTTA	11.8	12.8	12	13.6	13.2	13.5	-1.2	0.00028	0.02
MICRO.2487.C1	MICRO.2487.C1_1031	NP_001049173	11.9.3	lipid metabolism.lipid degradation.lysophospholipases	NOT VALIDATED NP_001049173: Os03g0182400 [Oryza sativa (japonica cultivar-group)]	TTCTGGAACTCTTTTTCACAGATTGTAGGTTCCAATGTTGTAAATACTTGCTAGCATTTC	8.8	9.6	9.2	10	10.2	10.1	-0.9	0.00027	0.02
MICRO.3252.C4	MICRO.3252.C4_277	NP_188425	35.1.19	not assigned.no ontology.C2 domain-containing protein	NOT VALIDATED NP_188425: unknown protein [Arabidopsis thaliana]	TGCAGAATTTGATATCAAACCATTTTTAGATGCTCTGAAAATGAACTTAGATTCCCTCCC	8.4	8.5	8.4	7.6	7.7	8	0.7	0.00026	0.02
MICRO.3305.C2	MICRO.3305.C2_676	AAV36808	13.2.2.3	amino acid metabolism.degradation.glutamate family.arginine	NOT VALIDATED AAV36808: arginase 1 [Lycopersicon esculentum]	TATTTGCAGTTCCTTGAGAGGAACCTGTGACACTTATATCTTTCTGGTATGGATTTTGTT	11.5	10.8	11.3	10.1	10.1	10	1.1	0.00027	0.02
MICRO.3368.C16	MICRO.3368.C16_254	AAA69780	35.2	not assigned.unknown	NOT VALIDATED AAA69780: proteinase inhibitor I	TAAATGATGTTCGAATAATATTGAGTGGTTCTCCAGTCCCATTGGATTATCGTTGTAATC	12.1	13.4	11.9	13.9	14.1	14.2	-1.6	0.00025	0.02
MICRO.4056.C3	MICRO.4056.C3_678	NA	30.2.17	signalling.receptor kinases.DUF 26	NOT VALIDATED NA: NA	GGGGATCATTTCTCATATAAAGCTATAGTTGGAGCTCTACCTCCACTCAAAATAGTCCTC	8.8	8.2	8.5	7.4	7.7	7.6	0.9	0.00025	0.02
MICRO.4068.C2	MICRO.4068.C2_1501	ABE83105	35.2	not assigned.unknown	NOT VALIDATED ABE83105: unnamed protein product; gene_id:MDA7.10 pir||T05056 similar to unknown protein [Medicago truncatula]	TAACTAGATATGCTTATGCAAGTAGTAGTTGTTAATTAACTACTCCTTACTTGGGAGTGC	10.5	11	10.4	11.5	11.5	12.1	-1.1	0.00026	0.02
MICRO.4125.C1	MICRO.4125.C1_878	BAB10164	35.1	not assigned.no ontology	NOT VALIDATED BAB10164: unnamed protein product [Arabidopsis thaliana]	AGCGAATCCAGGGATAAAGACTTATAGATATGATCCGTTTATAGGGAAGTTGTTTGTGGA	8.1	7.8	7.5	7.1	6.9	6.8	0.9	0.00026	0.02
MICRO.4155.C4	MICRO.4155.C4_944	P27524	1.01.01.01	PS.lightreaction.photosystem II.LHC-II	NOT VALIDATED P27524: Chlorophyll a-b binding protein CP24 10A, chloroplast precursor (CAB-10A) (LHCP)	TTCAAAATCTTCCCTTCATACAGTTTATGATCTTACTAACAGTTGTAACAATGCAGAGGC	6.9	6.5	6.9	7.7	7.9	7.3	-0.9	0.00027	0.02
MICRO.4497.C3	MICRO.4497.C3_1021	2CJP	26.01	misc.misc2	NOT VALIDATED 2CJP: Chain A, Structure Of Potato (Solanum Tuberosum) Epoxide Hydrolase I (Steh1)	TTGTGTAAGCGCTGTTCGTTACTTGTCATAATATGACTGGTAAAATAAGTTCGAATTTGG	10.5	11.7	9.8	12.5	12.1	12.5	-1.7	0.00027	0.02
MICRO.452.C1	MICRO.452.C1_1079	ABE79940	3.5	minor CHO metabolism.others	NOT VALIDATED ABE79940: Aldo/keto reductase [Medicago truncatula]	AGCATGAGAGAGACCATCACTGCTCTACCCTATGATGTAGTATGTTTTTTCCATTTCGAA	11.1	11.9	10.9	12.4	12.3	12.1	-1	0.00028	0.02
MICRO.4608.C1	MICRO.4608.C1_330	AAM66945	35.1	not assigned.no ontology	NOT VALIDATED AAM66945: unknown [Arabidopsis thaliana]	CCGGGTGAGGAGGAACCTTAATTATTTCCGTGTCAATTACGCTATGGTAATCCTTGTTAT	8.6	8.6	8.6	8	7.3	7.2	1.1	0.00027	0.02
MICRO.4800.C2	MICRO.4800.C2_1005	BAD06575	17.7.1.5	hormone metabolism.jasmonate.synthesis-degradation.12-Oxo-PDA-reductase	NOT VALIDATED BAD06575: LEDI-5c protein [Lithospermum erythrorhizon]	AACTGCGGCATGATGCCAATGTTTTTAAGCTACTTGTCTCACAAAAGAAGTGATCTATTA	6.9	7.2	7.3	6.3	6.2	6.6	0.8	0.00026	0.02
MICRO.4967.C2	MICRO.4967.C2_847	EAZ38957	27.4	RNA.RNA binding	NOT VALIDATED EAZ38957: hypothetical protein OsJ_022440 [Oryza sativa (japonica cultivar-group)]	TAGGTCCACGAGATGGTGACAGGTACTCCAGTGGAGGACCAGCACGTTACGAGGGGAAAA	10.8	10.4	10.5	9.9	10	9.1	0.9	0.00026	0.02
MICRO.6950.C1	MICRO.6950.C1_1441	NP_199109	35.1	not assigned.no ontology	NOT VALIDATED NP_199109: unknown protein [Arabidopsis thaliana]	CCAGATTATTTAGTTTCTAGTTGAAAGTTATTGAACTCAGTTATTTTGCAGGACCCTTCG	9.3	9.8	9.3	8.2	8.7	6.9	1.5	0.00025	0.02
MICRO.744.C2	MICRO.744.C2_608	NA	35.2	not assigned.unknown	NOT VALIDATED NA: NA	GACGTTTTTGACTTTGGCAACTTTTCTGAAAGTAAAATGTCGTGTGACCAAAATATGATG	7.7	8.2	7.6	6.9	7	6.7	1	0.00026	0.02
MICRO.8251.C2	MICRO.8251.C2_441	AAS92255	35.1	not assigned.no ontology	NOT VALIDATED AAS92255: putative pyridoxine biosynthesis protein isoform A [Nicotiana tabacum]	AGTAGATTACGTTGATGAATCGGAGGTGCTTACCCTTGCTGACGATGAGAACCACATCAA	15.8	14.7	16	13.5	13.2	14.1	1.9	0.00026	0.02
MICRO.93.C1	MICRO.93.C1_1559	BAE71223	35.1	not assigned.no ontology	NOT VALIDATED BAE71223: hypothetical protein [Trifolium pratense]	GAGGCACTGCATGCTTTGTTCTGTGAAAATGATGTATAAGGAGAAGTTGAGTCTTCTGGA	8.2	8.4	8.2	7.4	6.6	7.5	1.1	0.00025	0.02
MICRO.9813.C1	MICRO.9813.C1_1875	Q43839	7.1.01	OPP.oxidative PP.G6PD	NOT VALIDATED Q43839: Glucose-6-phosphate 1-dehydrogenase, chloroplast precursor (G6PD)	GAACTGCTGTCAGCAATTGTTGTATAGCGCTAGCTTGTCTATTTTGTTAAGAAAATACTC	8.5	8.2	8.3	9.9	9.4	9	-1.1	0.00025	0.02
POCBD24TP	POCBD24TP_716	CAA67700	29.4	protein.postranslational modification	NOT VALIDATED CAA67700: Ste20-like kinase [Homo sapiens]	CCTTCTGGATGGCACCTGAGGTCATCAAGCAGTCGGCCTACGACTTCAAGGCTGACATCT	7	6.7	6.7	7.5	7.5	8.5	-1	0.00026	0.02
POCCH38TP	POCCH38TP_846	ABG29114	17.5.3	hormone metabolism.ethylene.induced-regulated-responsive-activated	NOT VALIDATED ABG29114: multiprotein bridging factor 1c [Lycopersicon esculentum]	GAGCTGTTTTGACTTCTGTATCTGTTTCTACTCATTTATGTATGCATTTCATCCTCAGCA	7.5	7.7	8.8	6.7	7.2	6.7	1.1	0.00026	0.02
SDBN003F18u.scf	SDBN003F18u.scf_556	CAB50786	35.2	not assigned.unknown	NOT VALIDATED CAB50786: Rx protein [Solanum tuberosum]	TGCAAGAGAGAACTTTGGAGTAACTGGTAAAGTTGTTATCATGTGACTAGGAGGTCACCG	7.3	7.6	7.2	6.8	6.3	6.6	0.8	0.00028	0.02
STMJG58TV	STMJG58TV_298	NA	35.2	not assigned.unknown	NOT VALIDATED NA: NA	TTTGCTGTCAAATTCAAGCTATGAGTAGACTACATTTCTTTATTCAATTCTTAAGTTTAA	9	8.4	8.9	7.7	8.2	7.8	0.9	0.00026	0.02
TBSK02937FE09.t3m.scf	TBSK02937FE09.t3m.scf_287	NA	35.2	not assigned.unknown	NOT VALIDATED NA: NA	CAACGGAGACGTGCAGAAGGAGGATCCAGCATATGCTTCACATTAGGTCCATTGAATTTA	12.2	13.6	11.3	14.3	14.6	14.4	-2.1	0.00026	0.02
TBSK04708FA04.t3m.scf	TBSK04708FA04.t3m.scf_424	AAZ75959	33.1	development.storage proteins	NOT VALIDATED AAZ75959: patatin precursor [Solanum tuberosum]	AATCTGTGCTCAAGCTTGACAGCATTGCATCTCAAGCTTTGACATCAATACGCCTAAGCC	7.9	8.3	7.3	8.9	8.8	9.2	-1.1	0.00025	0.02
057F12AF.esd	057F12AF.esd_265	EAZ05455	27.3.52	RNA.regulation of transcription.Global transcription factor group	NOT VALIDATED EAZ05455: hypothetical protein OsI_026687 [Oryza sativa (indica cultivar-group)]	AAGATACAGATCCCAAAAGAGATGAACGTATAAATACAGGGGGTCCCAATGATTCAGATT	9.7	9	8.7	8.3	7.5	7.7	1.3	0.00029	0.021
092D05AF.esd	092D05AF.esd_265	NA	35.2	not assigned.unknown	NOT VALIDATED NA: NA	GGCCTTTTTTGGTTGGGGAAAAGGTTCTCTGGAAGGAACACCAACCTTAAAAGGTTAACC	6.4	6.7	6.7	7.6	7	7.7	-0.8	0.00031	0.021
ACDA01094D02.T3m.scf	ACDA01094D02.T3m.scf_382	NA	33.1	development.storage proteins	NOT VALIDATED NA: NA	TTTTGGCCCAATGTATGATGGAAGAATATTTTCTGCAAGGTTCTTTCAGGGAAAAACTTG	10	11.1	9.1	11.6	12.1	12.5	-2	0.00029	0.021
bf_arrayxxx_0021d02.t3m.scf	bf_arrayxxx_0021d02.t3m.scf_564	Q41433	20.1.07.06	stress.biotic.PR-proteins.proteinase inhibitors	NOT VALIDATED Q41433: Probable serine protease inhibitor 6 precursor (AM66)	GATCAATTCTAGTATCAAAGTTGGTGTAGTTCACGCAAAATGGACAACAGACGTTTGGCT	8.4	9.3	7.6	10.3	10.4	10.1	-1.8	0.00029	0.021
bf_arrayxxx_0028c10.t7m.scf	bf_arrayxxx_0028c10.t7m.scf_495	NP_173516	35.2	not assigned.unknown	NOT VALIDATED NP_173516: ATP binding / ATP-dependent helicase/ helicase/ nucleic acid binding [Arabidopsis thaliana]	AGAACTGCAACGCATCTTGGACGAAACCACGATGCAGGTCGGTCTGGGCGGCGACAAATA	6.7	6.7	6.8	7.6	7.2	7.6	-0.7	0.00029	0.021
BF_CSCHXXXX_0003C12.T3M.SCF	BF_CSCHXXXX_0003C12.T3M.SCF_53	NA	35.2	not assigned.unknown	NOT VALIDATED NA: NA	CTTTACAATTTTTATTATTTCTGGCAGAGAGGAGGGTGAACAGGTATTTTTAAGTCACTG	8.8	7.9	8.6	7.1	6.7	7.3	1.4	0.00029	0.021
bf_cswbxxxx_0041d01.t3m.scf	bf_cswbxxxx_0041d01.t3m.scf_517	NA	35.2	not assigned.unknown	NOT VALIDATED NA: NA	AATGTTAAGTTGGTTTGGTTGGTTCGAACCAGACCAGACTAAATGTATTCGTGATTTTTA	6.4	6.6	6.4	7.5	7.6	7.6	-1.1	0.00032	0.021
bf_cswbxxxx_0053a06.t3m.scf	bf_cswbxxxx_0053a06.t3m.scf_548	NA	35.2	not assigned.unknown	NOT VALIDATED NA: NA	TGTGCAACTCTTTAGTAGTTGCACAAGGATCCTGGTCTCTTTTGGAGGCCAAGTTCTTGT	6.8	6.5	6.8	8.1	7.9	7.2	-1	0.00031	0.021
bf_ivrootxx_0045a03.t3m.scf	bf_ivrootxx_0045a03.t3m.scf_506	NP_195884	35.2	not assigned.unknown	NOT VALIDATED NP_195884: unknown protein [Arabidopsis thaliana]	GCGTTGGCTTCGATTTTTCGGAGGTTACTATCTTGTACTACAAAGGTCGATGTGATTAGT	7.6	7.3	7.6	7	6.6	6.7	0.7	0.00032	0.021
BF_LBCHXXXX_0021A08_T3M.SCF	BF_LBCHXXXX_0021A08_T3M.SCF_362	NA	35.2	not assigned.unknown	NOT VALIDATED NA: NA	TAGATGCCTCCTAGCTCTTGGTGCTTGGATGAAGTCCTGCTCTGCAATAAAGTTGGTTTT	6.7	6.7	6.7	7.1	7.7	7.8	-0.8	0.00031	0.021
bf_lbchxxxx_0059g04.t3m.scf	bf_lbchxxxx_0059g04.t3m.scf_204	NA	35.2	not assigned.unknown	NOT VALIDATED NA: NA	ACAACTCAAAAATTACAGGACTATTGACATGTAATAATTCATGTGATGTTTGTTATTTAG	8.3	8.1	8.8	7.6	7.4	7.4	0.9	0.0003	0.021
bf_mxlfxxxx_0016e05.t3m.scf	bf_mxlfxxxx_0016e05.t3m.scf_447	EAZ09940	11.9.3	lipid metabolism.lipid degradation.lysophospholipases	NOT VALIDATED EAZ09940: hypothetical protein OsI_031172 [Oryza sativa (indica cultivar-group)]	ACAGGGTGAAAAAACAGGTAGAAATGATTTGATTGTGGGCTTGTATTTCTGCTGGATATT	9.1	9.4	8.7	11.1	10.2	9.8	-1.3	0.00032	0.021
bf_stolxxxx_0063e03.t3m.scf	bf_stolxxxx_0063e03.t3m.scf_488	NA	35.2	not assigned.unknown	NOT VALIDATED NA: NA	TCTCGACTTGCTTGATTCTTCTGTTTAAGGGTATATTTATCTGCCTTTATGTATGCTATG	7.5	7	7.4	7.8	8.6	8.6	-1	0.00031	0.021
cSTA11K20TH	cSTA11K20TH_120	AAM64393	35.2	not assigned.unknown	NOT VALIDATED AAM64393: unknown [Arabidopsis thaliana]	ACTCCAATCTTTGCTACTCACCCCGTAATAAGTGTTATTGCAGATAATCATGATGCACCA	7.9	7.9	7.8	7.2	6.7	7.2	0.8	0.00032	0.021
cSTB10O22TH	cSTB10O22TH_64	NP_001053395	12.4	N-metabolism.misc	NOT VALIDATED NP_001053395: Os04g0531300 [Oryza sativa (japonica cultivar-group)]	CCGCCGGCTAGGAAAATTCTTCCTCTCTTTTCAAGTCAAGAATGATGGATTACAGAAACA	9.5	7.6	8.8	6.8	7.4	6.9	1.6	0.00032	0.021
cSTB3A6TH	cSTB3A6TH_1	AAD01264	29.5.05	protein.degradation.serine protease	NOT VALIDATED AAD01264: glucose acyltransferase [Solanum berthaultii]	GTGAATTCCACTCAACTCCAATGGTGCTGGCTTTCATTGTGTTTGGACTGATGCTACTCT	7.6	8.6	7.4	9	9.4	9.5	-1.4	0.00032	0.021
cSTB41B12TH	cSTB41B12TH_228	NA	35.2	not assigned.unknown	NOT VALIDATED NA: NA	TTTTGAACCGAAAGAAGCATATTATGGTGTAAGGATTATTGTTATTATATATGTCGAAGA	6.8	6.6	6.5	7.3	7.4	8	-1	0.00031	0.021
cSTB48I16TH	cSTB48I16TH_484	NP_177218	34.16	transport.ABC transporters and multidrug resistance systems	NOT VALIDATED NP_177218: ATTAP1; ATPase, coupled to transmembrane movement of substances [Arabidopsis thaliana]	CTTTATCAGAAATTTCTATACCGCATTTTCTCACAGCATCCATCTTTACGGCACAAAGTA	6	5.8	6	6.5	6.9	7	-0.9	0.00029	0.021
cSTD7P13TH	cSTD7P13TH_752	BAB63464	30.3	signalling.calcium	NOT VALIDATED BAB63464: calcium dependent protein kinase [Solanum tuberosum]	CTGACTTTGACAACACGGCACTATCGACTATGGGTGAATTCATCGCTGCAACATTGCATT	8.1	8	8.5	7.2	7.1	6.7	1.2	0.00032	0.021
MICRO.10524.C1	MICRO.10524.C1_582	NP_200382	35.2	not assigned.unknown	NOT VALIDATED NP_200382: unknown protein [Arabidopsis thaliana]	TGCTGAAGCTGCTGATAGGCAAGTGCTATGAACTCGTAAATTTACTTATTTCTGAGGTTT	9	9.8	9.2	10.1	10	10.3	-0.8	0.00029	0.021
MICRO.10892.C2	MICRO.10892.C2_271	ABE93759	20.2.1	stress.abiotic.heat	NOT VALIDATED ABE93759: Heat shock protein DnaJ [Medicago truncatula]	GAATCCTGATGATGAGGAAGCAAAAGAGAAATTTCAGCAGTTGCAAAAGGTGATATCAAT	8.6	8.5	8.2	7.8	6.8	7.5	1.1	0.0003	0.021
MICRO.11136.C1	MICRO.11136.C1_1057	CAA11226	3.5	minor CHO metabolism.others	NOT VALIDATED CAA11226: chalcone reductase [Sesbania rostrata]	ATTACAATATGACAGAGCGGTGGAACCACTTCTTAGTATGCGGGTAGGGGGTGATTACTA	7.7	7.5	9	6.8	6.5	7	1.3	0.0003	0.021
MICRO.12879.C1	MICRO.12879.C1_2233	NP_196921	27.3.44	RNA.regulation of transcription.Chromatin Remodeling Factors	NOT VALIDATED NP_196921: unknown protein [Arabidopsis thaliana]	TTTGCTACCAGAAGTTGTTACTGTGCCAAAAGTATAGGCTGCTTTCAATGTATGGACAGA	6.3	6.6	6.4	7	7.2	7.2	-0.7	0.00032	0.021
MICRO.13108.C2	MICRO.13108.C2_528	ABC69387	16.2.1.05	secondary metabolism.phenylpropanoids.lignin biosynthesis.C3H	NOT VALIDATED ABC69387: CYP92B2v3 [Nicotiana tabacum]	TGGAACCTAGACTTCCCTTCCATCTTTATTAGAACTAGCTATAGTACTTTGTTTTGGTCT	13.4	11.9	15.2	9	9.3	9.7	4.2	0.00028	0.021
MICRO.1348.C1	MICRO.1348.C1_584	NA	35.2	not assigned.unknown	NOT VALIDATED NA: NA	GTTGAGTTTCCTCTTTTTCCATGCTTTGGTTTGTGTGACTGCTACCCTGATTTACATGTT	7.7	7.1	7.4	7.9	8.4	8.6	-0.9	0.00031	0.021
MICRO.13662.C1	MICRO.13662.C1_1447	BAE72094	17.1.1	hormone metabolism.abscisic acid.synthesis-degradation	NOT VALIDATED BAE72094: Lactuca sativa carotenoid cleavage dioxygenase 1	ATCCAGCTTATGTTGGGAAAAAGAACAAGTATGTATATGCAGCCATTGGGGACCCTATGC	7.9	9.5	7.4	10.2	10.7	11	-2.4	0.00029	0.021
MICRO.1389.C2	MICRO.1389.C2_1391	AAX73303	16.4.2	secondary metabolism.N misc.betaine	NOT VALIDATED AAX73303: putative betaine aldehyde dehyrogenase [Lycopersicon esculentum]	AGGGATCATCTGGATTAACTGTTCACAGCCAACCTTTAATCAGCTTCCATGGGGTGGTAA	7.7	6.9	7.2	8.8	7.9	8.7	-1.2	0.00029	0.021
MICRO.14993.C1	MICRO.14993.C1_1426	ABB89019	35.2	not assigned.unknown	NOT VALIDATED ABB89019: CXE carboxylesterase [Actinidia deliciosa]	GGCACAGGTTCCTGCTCTTGGGGTATCTGCCTACCTCCTTTCATACATATTTAGTTTCAA	9.3	9.1	9.9	8.6	8.6	8.6	0.8	0.00029	0.021
MICRO.1520.C17	MICRO.1520.C17_365	ABB96231	35.2	not assigned.unknown	NOT VALIDATED ABB96231: patatin group E [Solanum tuberosum]	GAAACCAGTTTCTAAAGACAATCCTGATGACACCTATGAGAAAGCTCTAGAGAGGTTTGC	11.2	12.8	10.2	13.9	14	13.1	-2.3	0.00029	0.021
MICRO.15495.C1	MICRO.15495.C1_1465	ABD96873	35.1.5	not assigned.no ontology.pentatricopeptide (PPR) repeat-containing protein	NOT VALIDATED ABD96873: hypothetical protein [Cleome spinosa]	TCCAATTAGAGTTCACTTGGTGATTAATCGACACAATAACATAGTTGCCATTGACTCATC	8.1	7.9	7.6	6.9	7.4	7.2	0.7	0.00029	0.021
MICRO.15828.C1	MICRO.15828.C1_540	NA	35.2	not assigned.unknown	NOT VALIDATED NA: NA	TCCCACCACTCTCGACGTCCCTGTCCTTGTGAGAAATATCCTTGATTCTATGGTAATGTA	9.7	9.4	9.9	8.7	8.9	9.2	0.7	0.00029	0.021
MICRO.16045.C1	MICRO.16045.C1_129	NA	35.2	not assigned.unknown	NOT VALIDATED NA: NA	GGTTCCTGCCATTGTGATTGTATGTAATTTTTTCTACGGTTGTTTGTTTGTGAGTTTCTC	7.9	8.1	8	8.5	9.4	9.3	-1.1	0.0003	0.021
MICRO.16067.C1	MICRO.16067.C1_782	NP_194271	35.2	not assigned.unknown	NOT VALIDATED NP_194271: DNA binding / transcription factor [Arabidopsis thaliana]	TATACCATTCAAGTGCATTTTTGGCAGTAAGGATGTTGGGTTTGTAGAAAATGCCTTGTT	8.4	8.9	8.4	10.2	10.3	9.2	-1.3	0.00028	0.021
MICRO.16189.C1	MICRO.16189.C1_252	NA	35.2	not assigned.unknown	NOT VALIDATED NA: NA	TGTCAACGCTAATCATTTGATCCTTTACTATTCTACTTTTTCTTTGTTATGAAGCAAAAT	9.4	11.9	8	12.8	13.4	13.5	-3.5	0.00029	0.021
MICRO.16203.C1	MICRO.16203.C1_1105	P24804	35.2	not assigned.unknown	NOT VALIDATED P24804: Anther-specific protein TA-29	AGAAGGAGAAACCTAAGCACACTGCTTGTTTTGAAATCATGAATGGGGCCATAAGATTAT	6.9	6.6	6.7	7.1	8	7.6	-0.9	0.00031	0.021
MICRO.1728.C2	MICRO.1728.C2_1807	NP_564596	29.5.11.05	protein.degradation.ubiquitin.ubiquitin protease	NOT VALIDATED NP_564596: UBP6 (UBIQUITIN-SPECIFIC PROTEASE 6); ubiquitin-specific protease [Arabidopsis thaliana]	GTTCTTTGATTATCCATTGTTGGTTATTGGTGCTTTCCTGAAATTGCTGCAAACAATGAT	10.1	10.2	10.4	9.5	9.2	9.1	1	0.00031	0.021
MICRO.17348.C1	MICRO.17348.C1_445	ABN08611	35.2	not assigned.unknown	NOT VALIDATED ABN08611: CBS [Medicago truncatula]	TTGCTAATGCAAGGCTTAAACCTGAGACACAGAATTTATCAACCCAATAATAATAAGACC	10.5	12.2	10	12.7	13	12.6	-1.9	0.00031	0.021
MICRO.17416.C1	MICRO.17416.C1_671	EAZ28087	35.1.5	not assigned.no ontology.pentatricopeptide (PPR) repeat-containing protein	NOT VALIDATED EAZ28087: hypothetical protein OsJ_011570 [Oryza sativa (japonica cultivar-group)]	AAGCCAAAGAGGAACTTCGACAGGCAAACTCTTAGAGAAGGCACCTTTGAAGGAGGAAAA	8	8.5	7.8	7	6.7	6.9	1.2	0.00031	0.021
MICRO.1894.C1	MICRO.1894.C1_1910	NP_568463	26.1	misc.cytochrome P450	NOT VALIDATED NP_568463: CYP714A1; heme binding / iron ion binding / monooxygenase/ oxygen binding [Arabidopsis thaliana]	ATGGGGTCATTTGCACTTTTATGCCTATGTAAGTATTTTGTGTTGGTCTGCTAAGGTAAA	7.7	7	7.8	8.4	8.9	8.9	-1.2	0.00029	0.021
MICRO.1999.C3	MICRO.1999.C3_496	NP_973812	29.1	protein.aa activation	NOT VALIDATED NP_973812: ATP binding / serine-tRNA ligase/ tRNA ligase [Arabidopsis thaliana]	ATGTCCACCTTGAAGTTTTTGGTGGCTAGGTTATTCATTGTGTGAATTGTATTTTTCATC	6.5	6.4	6.7	7.6	7.3	6.9	-0.7	0.00032	0.021
MICRO.2828.C1	MICRO.2828.C1_383	BAE99404	29.3.3	protein.targeting.chloroplast	NOT VALIDATED BAE99404: hypothetical protein [Arabidopsis thaliana]	TGCAGACAGTCGCAGAACCAAAATACACTTTCTGTCCAGTGGAATGTCAAAGAGGGAGAA	8	7.8	7.8	7.2	6.5	7	1	0.00031	0.021
MICRO.310.C1	MICRO.310.C1_723	ABE93571	35.2	not assigned.unknown	NOT VALIDATED ABE93571: hypothetical protein MtrDRAFT_AC124952g40v1 [Medicago truncatula]	TTCTTACACTCAAAAACTACGATTTTAACAGTTTCACTGTTGTTACGCATTCGCTAAACG	9.4	7.9	9.2	8	6.5	7	1.6	0.00031	0.021
MICRO.331.C72	MICRO.331.C72_1271	AAP47579	26.16	misc.myrosinases-lectin-jacalin	NOT VALIDATED AAP47579: receptor kinase Lecrk [Gossypium hirsutum]	GGAACTAAGCAACAAAGGTTAGCAGGAGATCTGGAGAAACTGAATAGCTACCTGGCTCAA	7	7.1	7	7.5	8.5	8	-1	0.00029	0.021
MICRO.347.C63	MICRO.347.C63_407	ABC01914	35.2	not assigned.unknown	NOT VALIDATED ABC01914: unknown [Solanum tuberosum]	AAAGACGGTTGGAACAATTGCACGAGAGATGGAAAAAGAATTGGGACGCACTCCCATTGA	8.7	10.1	8.7	11.2	11.5	11.4	-2.2	0.0003	0.021
MICRO.3864.C2	MICRO.3864.C2_520	Q9S8M0	35.2	not assigned.unknown	NOT VALIDATED Q9S8M0: Chitin-binding lectin 1 precursor (PL-I)	TTCACAAACTTGGCAAGAGGATGAACTTTTACTCCTCTTTTGGGACTAGTACTGAAGTGT	9.1	9.9	8.8	11.3	11.4	11	-2	0.00032	0.021
MICRO.4006.C1	MICRO.4006.C1_1088	NP_189598	35.2	not assigned.unknown	NOT VALIDATED NP_189598: unknown protein [Arabidopsis thaliana]	TATCCATCATGATTTCTGTGTATTGGAAGTGTCTGATGTGCTATGCACTCAAGACACTCA	6.8	7	6.9	7.5	7.4	8	-0.7	0.00032	0.021
MICRO.4126.C3	MICRO.4126.C3_923	CAA18116	30.2.5	signalling.receptor kinases.leucine rich repeat V	NOT VALIDATED CAA18116: serine/threonine protein kinase like protein [Arabidopsis thaliana]	GGTCAAGAGCAACTATGGCAGATAAAACTCGGAGGTGTCAATACCAGGGACATTAAAAAT	8	8.5	8.5	7.7	7	7.3	1	0.00031	0.021
MICRO.5125.C1	MICRO.5125.C1_1161	NP_568497	35.2	not assigned.unknown	NOT VALIDATED NP_568497: unknown protein [Arabidopsis thaliana]	TCAAATTACTTGGTGCATTCAGTTTCCTTGATCAGAGAAGTTGTGGTATATTTTCAAGGA	9.9	10.3	9.2	11.2	11.2	10.6	-1.2	0.0003	0.021
MICRO.5138.C1	MICRO.5138.C1_292	NP_001044954	35.2	not assigned.unknown	NOT VALIDATED NP_001044954: Os01g0873800 [Oryza sativa (japonica cultivar-group)]	TTGAGGGAGGTTGAAAGGCTCAAGAAGATGCTTGGACAGTCTAATCAAAACTGCAGCTCA	8.6	8	8.4	6.6	7.3	7.1	1.3	0.00029	0.021
MICRO.592.C6	MICRO.592.C6_568	NP_181684	35.1	not assigned.no ontology	NOT VALIDATED NP_181684: catalytic/ hydrolase, acting on ester bonds [Arabidopsis thaliana]	CATTATGTGTGACTTTCTTGTTACTCTATAAACTTTGGGGCTTCTTGCTATGCTACTTAT	11.2	12	11.7	12.7	12.8	12.5	-1	0.0003	0.021
MICRO.6063.C1	MICRO.6063.C1_263	BAB84584	27.3.67	RNA.regulation of transcription.putative DNA-binding protein	NOT VALIDATED BAB84584: transcription factor LIM [Nicotiana tabacum]	AAATTGTGAAGCCAGAGAAAGATGAGAAACCACAGGCAGCTAAAGTTTCAAGCATGTTTG	9.2	8.8	8.8	8.4	7	8	1.1	0.00032	0.021
MICRO.6641.C2	MICRO.6641.C2_2289	BAC41892	35.2	not assigned.unknown	NOT VALIDATED BAC41892: unknown protein [Arabidopsis thaliana]	CTTATCAAGTGTTTGTATTTCTAAGGTGTGTGTTTGTTGTAGCATTGTTGTAAAGTGCAG	9.1	9.6	9	10.2	10.1	10.1	-0.9	0.00031	0.021
MICRO.7422.C2	MICRO.7422.C2_494	NP_196460	35.1	not assigned.no ontology	NOT VALIDATED NP_196460: unknown protein [Arabidopsis thaliana]	CTAATAGGATTTTCGTAAATGGAGATGCATTCACTGCTGATGAAAATGGAGATATCATGG	9.1	8.9	8.9	8.4	7.1	7.9	1.2	0.00032	0.021
MICRO.7548.C1	MICRO.7548.C1_565	ABE91083	35.2	not assigned.unknown	NOT VALIDATED ABE91083: YT521-B-like protein [Medicago truncatula]	ATGATAGATGGTCAGCTATACTCGCACCAGATTCCAGTTTCTTCACCTTACTATGCACCA	8.9	8.3	8.5	7.8	7	7.6	1.1	0.00031	0.021
MICRO.8533.C2	MICRO.8533.C2_650	CAA67923	29.5.11.01	protein.degradation.ubiquitin.ubiquitin	NOT VALIDATED CAA67923: ubiquitin-like protein [Arabidopsis thaliana]	GTTCGATTTCTAAACACTTGTTATTCCATTTCCGATTAAGATCCATCCATCTACTTGAAG	7.9	8	8.7	7.6	7	6.9	1	0.0003	0.021
MICRO.9171.C1	MICRO.9171.C1_532	Q9FS87	13.2.4.4	amino acid metabolism.degradation.branched-chain group.leucine	NOT VALIDATED Q9FS87: Isovaleryl-CoA dehydrogenase 2, mitochondrial precursor (IVD 2)	TTAAACAACGCGAACAATTTGGGCAACCGATTGGAGAATTCAATTTGTACAGGGAAAAGT	9.4	8.3	9.7	8.1	7.7	7.1	1.5	0.00032	0.021
MICRO.9315.C2	MICRO.9315.C2_82	NA	35.2	not assigned.unknown	NOT VALIDATED NA: NA	GCTAAGCAGTTGGATGTTTAGACTCTGTGGAGCTAATTCTTGGCATGTTCAGCTGGATGA	12.3	11.3	12.6	11.1	9	9.4	2.2	0.0003	0.021
MICRO.9366.C1	MICRO.9366.C1_1235	AAT38805	35.2	not assigned.unknown	NOT VALIDATED AAT38805: hypothetical protein SDM1_47t00008 [Solanum demissum]	CCCCCCTTCTTTTGGTGTTAACTTGTAGAGTTTATCTAACTCTAGTTCTAGCCCAAGATC	7.6	7.7	7.6	8.5	8.7	8.8	-1	0.0003	0.021
MICRO.9971.C1	MICRO.9971.C1_575	NP_001054163	35.2	not assigned.unknown	NOT VALIDATED NP_001054163: Os04g0663300 [Oryza sativa (japonica cultivar-group)]	GTATGCAACAAAACGCCAACGCTAATCGACTCTTCAATCTTGTCTCTTTTGGGTGTGATT	10.8	10.2	11.6	9.5	9.7	9.6	1.2	0.00029	0.021
SSBN001F03u.scf	SSBN001F03u.scf_264	NA	27.3.11	RNA.regulation of transcription.C2H2 zinc finger family	NOT VALIDATED NA: NA	ATAAGGGCTCGTCAGGTCAGTGTATTGGGATATTAGTTGATTGTTGTACAATAGACGTTT	8.8	9.5	8.3	10.1	9.9	9.9	-1.1	0.00031	0.021
SSBT006O21x.scf	SSBT006O21x.scf_386	AAD50644	15.2	metal handling.binding, chelation and storage	NOT VALIDATED AAD50644: ferritin 1 [Solanum tuberosum]	GAACGCGAATTTTTTGGCCGGAGCCAGGTTGAGCGCTATTAAGAAAATTTGCCGAATATT	14.4	13.3	13.5	12.6	12.6	12.4	1.2	0.00032	0.021
STMGS21TV	STMGS21TV_780	NP_177209	30.2.17	signalling.receptor kinases.DUF 26	NOT VALIDATED NP_177209: kinase [Arabidopsis thaliana]	AATGTGGATCTGAGGCCTCATTTGTTTTCATTAAGATTTAGACGTTTGAGTCAAAATGCA	8.7	8.7	9.1	8	7.8	7.3	1.1	0.0003	0.021
STMIW60TH	STMIW60TH_662	CAA43590	1.01.01.01	PS.lightreaction.photosystem II.LHC-II	NOT VALIDATED CAA43590: Type I (26 kD) CP29 polypeptide [Solanum lycopersicum]	TCTGCAATACATTTCAGAGCTGTATGTGAAAACCATCTTGTAGTTTATGAAGACAAACTG	10.4	10	9	11.8	10.8	12.4	-1.9	0.0003	0.021
TBSK00568FH04.t3m.scf	TBSK00568FH04.t3m.scf_182	NA	35.2	not assigned.unknown	NOT VALIDATED NA: NA	CCAATTTGTCTATTTCAACATCGAAATTGTGGTGTTAGTTCATACAGATTTGGAAAGTGG	12.6	13.7	11.6	14.6	14.7	14.9	-2.1	0.00032	0.021
172H01AF.esd	172H01AF.esd_443	AAM09517	16.8.3	secondary metabolism.flavonoids.dihydroflavonols	NOT VALIDATED AAM09517: putative glucosyltransferase [Phaseolus lunatus]	GTTTGTATGGGTGTTGAGAGACGCCGATAGAGGAGATATCTTTACTGAGGAAGCTAGGAA	8.3	9.1	8.4	9.4	10	10.4	-1.3	0.00036	0.022
188G06.esd	188G06.esd_51	AAZ75959	33.1	development.storage proteins	NOT VALIDATED AAZ75959: patatin precursor [Solanum tuberosum]	CTTCTATTAACTCAGTGGATTACAAGCACATGTGGTTGCTCTCATTAGGTACCGGCACTA	8.9	10.4	8.1	11	11.6	11.2	-2.1	0.00033	0.022
bf_arrayxxx_0008d10.t7m.scf	bf_arrayxxx_0008d10.t7m.scf_386	NP_197589	29.6	protein.folding	NOT VALIDATED NP_197589: ATP binding / protein binding [Arabidopsis thaliana]	ATCGGTCATGTTTAAGCTGTTGAGGTTACTCGTATTTCTATTATGGTTTGAGAATTTGAG	9.1	9.7	9.2	9.8	10.3	10.3	-0.8	0.00034	0.022
bf_cswbxxxx_0019f06.t3m.scf	bf_cswbxxxx_0019f06.t3m.scf_341	NA	35.2	not assigned.unknown	NOT VALIDATED NA: NA	TGATAATCTGCCTCAGCTAACTCTTTCAGGAGTGCAATTATCAACTGCCTCTCTCCTTCT	7.4	6.7	8.3	5.8	6.1	6.6	1.3	0.00034	0.022
bf_cswcxxxx_0007d05.t3m.scf	bf_cswcxxxx_0007d05.t3m.scf_279	NP_194819	35.2	not assigned.unknown	NOT VALIDATED NP_194819: unknown protein [Arabidopsis thaliana]	TTATACGGACCGTATCATGGATTCAAAAGGTACCAAGCAGGGTCCACTCGAGTTCTTCAA	7.8	8.2	7.5	8.6	8.9	8.7	-0.9	0.00034	0.022
bf_mxflxxxx_0021b07.t3m.scf	bf_mxflxxxx_0021b07.t3m.scf_530	ABO83789	29.2.2	protein.synthesis.misc ribosomal protein	NOT VALIDATED ABO83789: Ribosomal protein L18P/L5E [Medicago truncatula]	TTGCAATGTATAAGATGTCACTTCTGACATTCCCTGTGTTTTGAAGCTTCTATTCCAAGA	10.6	11.2	10.5	11.9	11.5	11.6	-0.9	0.00034	0.022
bf_mxflxxxx_0065h12.t3m.scf	bf_mxflxxxx_0065h12.t3m.scf_614	NA	35.2	not assigned.unknown	NOT VALIDATED NA: NA	AGTGGTGTTTTTTGAATTAGCAGTGTTATAGTGATGCTTAATCATTTTTCATGTCTTTTG	6.1	6.5	6.2	6.7	8.1	7.4	-1.1	0.00035	0.022
bf_mxlfxxxx_0037c05.t3m.scf	bf_mxlfxxxx_0037c05.t3m.scf_478	NA	35.2	not assigned.unknown	NOT VALIDATED NA: NA	CTTGCAAAATTGATAGCAATGTAATGCATGTGATGAGAAAATCAATTTTGTGGCAAGACC	7.8	7.9	8.3	7.6	6.8	6.8	1	0.00036	0.022
bf_mxlfxxxx_0073g10.t3m.scf	bf_mxlfxxxx_0073g10.t3m.scf_477	NA	35.2	not assigned.unknown	NOT VALIDATED NA: NA	GAGTGTATAAGGGTCTCATAGAATGGTAACTGATTTCAGCTGTTCAATTCTGTTGCTTGT	13.4	10.3	14.9	9.5	8.8	8.5	3.9	0.00034	0.022
BF_TUBSXXXX_0035H11_T3M.SCF	BF_TUBSXXXX_0035H11_T3M.SCF_2	NA	35.2	not assigned.unknown	NOT VALIDATED NA: NA	GAGGCTCCGGACGAACATGGGTTTTTACAAAGTCTCCTTCAAGCTGTGAAACTTTCAAGT	10.3	11.7	10.1	12.3	12.3	12	-1.5	0.00033	0.022
cSTA5H12TH	cSTA5H12TH_369	AAC18791	35.2	not assigned.unknown	NOT VALIDATED AAC18791: Similar to hypothetical 41.9KD protein gb|1001369 from sequence of Synechocystis sp. gb|D64006. [Arabidopsis thaliana]	TTGAAGAAGATTAAGAGGAGAGTTTTGGTTGGGGATAAGGCTTTGGTAGGTTCAATTGAT	7.8	7.5	7.8	7	6.8	6.8	0.8	0.00036	0.022
MICRO.101.C3	MICRO.101.C3_858	NP_567972	29.5.01	protein.degradation.subtilases	NOT VALIDATED NP_567972: SLP2; subtilase [Arabidopsis thaliana]	TATTTTGGCTTTAGGGGTTAGAAAAAGCCTAGAACCCAGGGCCAAAATATGGGGTTTTGT	9.4	10.9	8.8	11.7	11.4	11.9	-2	0.00034	0.022
MICRO.10677.C2	MICRO.10677.C2_1057	NP_173345	23.1.2.30	nucleotide metabolism.synthesis.purine.IMP dehydrogenase	NOT VALIDATED NP_173345: unknown protein [Arabidopsis thaliana]	TGGTTGGACTGTCACACTACTTGTATGTATAGTTGTATAACTGTGTTTCATTCCAGATGT	9.6	10.3	9.6	10.6	10.8	11.1	-1	0.00035	0.022
MICRO.10963.C2	MICRO.10963.C2_84	S00629	10.8.01	cell wall.pectin*esterases.PME	NOT VALIDATED S00629: pectinesterase (EC 3.1.1.11) precursor (clone PE1) - tomato	CGGTGGCACTTCGAGTTGGAGGTGATATGTCTGTCATAAATCGTTGTCGTATTGATGCTT	8.2	9.1	7.9	10.3	10	10.5	-1.9	0.00035	0.022
MICRO.11590.C3	MICRO.11590.C3_602	NP_001066837	35.1	not assigned.no ontology	NOT VALIDATED NP_001066837: Os12g0506400 [Oryza sativa (japonica cultivar-group)]	GTCTGATCAACCAACATAGCCCTGGAAATTCTCTACTTGAACTGTGAGCTAACTTGCTTT	9	9.6	8.7	10.1	10.3	9.8	-1	0.00036	0.022
MICRO.12016.C1	MICRO.12016.C1_880	AAU89742	29.4.1.57	protein.postranslational modification.kinase.receptor like cytoplasmatic kinase VII	NOT VALIDATED AAU89742: serine/threonine protein kinase-like [Solanum tuberosum]	TTTGTGTCAGAAAATCACTCTTCCTATTTTATCTTCAGCCCACATCATAAGTGGAACTAG	8	8.3	8.9	7.7	6.8	7.2	1.2	0.00033	0.022
MICRO.12768.C1	MICRO.12768.C1_1117	ABO81650	35.2	not assigned.unknown	NOT VALIDATED ABO81650: Cyclin-like F-box; FBD [Medicago truncatula]	AGGTAGACCGTTGCACTTTTCATGCTCCATTGTTGAAGAACTAAAAGACATTAGCATTGG	8.8	8.6	8.8	8	7.7	8.1	0.8	0.00035	0.022
MICRO.12875.C1	MICRO.12875.C1_729	NP_001057148	31.3	cell.cycle	NOT VALIDATED NP_001057148: Os06g0216800 [Oryza sativa (japonica cultivar-group)]	TTTTGAGCCGATTTCTGACTTGACTTTTTATTCTGCTTAGTGGGCATTCTTCTGTTTGAT	8.1	8.1	8.5	8.9	9.1	9	-0.8	0.00034	0.022
MICRO.1291.C1	MICRO.1291.C1_96	O22478	29.3.1	protein.targeting.nucleus	NOT VALIDATED O22478: Importin subunit alpha (Karyopherin subunit alpha) (KAP alpha)	CGATAGTTGATTTGAGTTCAGAATTTTGATTCACCGGAGCTATGTCACTGAGGCCGAACT	8.8	8.5	8.2	7.4	6.7	7	1.5	0.00035	0.022
MICRO.13004.C1	MICRO.13004.C1_642	NP_001052272	26.07	misc.oxidases - copper, flavone etc.	NOT VALIDATED NP_001052272: Os04g0223500 [Oryza sativa (japonica cultivar-group)]	ACAATAAGGATAGCATGCTAGTACTTTCCAGTTCAAAAGGAATGTCTTCTGAGAGTTACA	9	10.1	8.7	10.7	10.8	10.7	-1.5	0.00036	0.022
MICRO.13097.C1	MICRO.13097.C1_739	NA	35.2	not assigned.unknown	NOT VALIDATED NA: NA	ATTGGGAGACACTATCATAGATTCTTCATAGGAGGTTGTCTTAACCTTTTTCACCATCTC	9.6	8.3	9.1	7	7	6.7	2.1	0.00036	0.022
MICRO.1345.C1	MICRO.1345.C1_1453	AAK11565	17.6.1	hormone metabolism.gibberelin.synthesis-degradation	NOT VALIDATED AAK11565: ent-kaurenoic acid hydroxylase [Arabidopsis thaliana]	GATGTTATCCTCCTGAAAATTGTCTTGTGAAATTCAAGAAGCTCTCAATCTCTAGTGATG	7	7.3	6.4	10.7	11.4	9.2	-3.6	0.00033	0.022
MICRO.15374.C1	MICRO.15374.C1_1186	NP_176372	35.1	not assigned.no ontology	NOT VALIDATED NP_176372: oligosaccharide transporter [Arabidopsis thaliana]	ACATGTCAGCACTTATGTTTTAATTGAAGGTTTGGAAAGGGATTATGTACACATTGCACT	9.1	9.9	9.2	10.6	10.3	10.2	-1	0.00036	0.022
MICRO.16814.C1	MICRO.16814.C1_704	BAD44568	15.2	metal handling.binding, chelation and storage	NOT VALIDATED BAD44568: truncated copper-binding protein CUTA (CUTA) [Arabidopsis thaliana]	CTTTCTTATCTTACATTCACGGGTGATTTTGGGCATTGCCTTTTGTATATATGGTGACTA	9	9.1	9.1	10	10	9.5	-0.8	0.00033	0.022
MICRO.17318.C1	MICRO.17318.C1_158	EAZ00731	1.03.08	PS.calvin cyle.transketolase	NOT VALIDATED EAZ00731: hypothetical protein OsI_021963 [Oryza sativa (indica cultivar-group)]	TCCGGGTGTATGCATGCTTTCTTGTTCCTCATAAGTTTTCGGGGCGTATGCTTATGCTTT	9.8	10.4	9.7	10.8	10.6	10.7	-0.7	0.00033	0.022
MICRO.237.C8	MICRO.237.C8_1460	CAD13177	31.1	cell.organisation	NOT VALIDATED CAD13177: alpha-tubulin [Nicotiana tabacum]	ATGATGGCTTTGTTTGTTGGATTGTATTTTCCTTTGGGTGTTCTTCAAATGCTGCACTTA	10.8	10.9	10.7	11.7	11.9	11.3	-0.8	0.00036	0.022
MICRO.3704.C1	MICRO.3704.C1_711	NP_187144	27.3.49	RNA.regulation of transcription.GeBP like	NOT VALIDATED NP_187144: transcription regulator [Arabidopsis thaliana]	TAAGGAATTTGTCTTTAAGAGCCCTCACGATCAAGCCACCTTCGAGATCTCTCGCAAGAT	8.8	8.7	8.6	8.1	7.7	7.9	0.8	0.00034	0.022
MICRO.3724.C1	MICRO.3724.C1_1462	ABE91027	19.5	tetrapyrrole synthesis.porphobilinogen deaminase	NOT VALIDATED ABE91027: Porphobilinogen deaminase [Medicago truncatula]	ACTGTTGTAAGCTAACCAAAGTGTAATCTATCGTTGGCTTCATTTATGCAACGGATTCGT	7.9	8.1	7.8	8.9	8.7	8.9	-0.9	0.00035	0.022
MICRO.4519.C2	MICRO.4519.C2_833	AAA34140	1.01.02.01	PS.lightreaction.photosystem I.LHC-I	NOT VALIDATED AAA34140: chlorophyll a/b-binding protein	TTAGCCAAAAACACCTTGTAAAACTCTCCCATGTACTAATAGATTTCTAATGGAATGGAC	11.8	11.4	9.7	13.9	12.3	13.7	-2.3	0.00036	0.022
MICRO.5100.C1	MICRO.5100.C1_736	CAC87837	29.5.11.04.03.03	protein.degradation.ubiquitin.E3.SCF.cullin	NOT VALIDATED CAC87837: cullin 1C [Nicotiana tabacum]	GAGAGGAGTATCCTAACAAAGTGAAGCAACAGTGTGGGGACAGTTCACATCAAAGATGGA	8.6	8.5	7.8	7.6	7	6.9	1.1	0.00034	0.022
MICRO.5285.C1	MICRO.5285.C1_1501	NP_190985	31.1	cell.organisation	NOT VALIDATED NP_190985: ATFIP37 (ARABIDOPSIS THALIANA FKBP12 INTERACTING PROTEIN 37) [Arabidopsis thaliana]	TTGTATCGTGCGGAACTGTAATTTATCTTGTAGAGTGTAGCTAGTCTATATGCAGGTAGC	9.6	10	9.5	8.9	8.7	9.1	0.8	0.00036	0.022
MICRO.5651.C2	MICRO.5651.C2_1834	EAZ42371	35.1	not assigned.no ontology	NOT VALIDATED EAZ42371: hypothetical protein OsJ_025854 [Oryza sativa (japonica cultivar-group)]	GTTAACTTATCCAGTTTTGCATACTTTCAAGAATGGAATTATGGTAGATTGTGCTACTGG	7.4	8	7.6	8.4	8.5	9.1	-1	0.00034	0.022
MICRO.593.C2	MICRO.593.C2_1	NP_568647	35.2	not assigned.unknown	NOT VALIDATED NP_568647: unknown protein [Arabidopsis thaliana]	CCTCTTTTGGCTCTTACAACCGAAAGCAAAAAACCTAAGTCCCAAATAGAGAGCAAAGAT	8.3	8.1	8.2	7.5	7.4	7.5	0.8	0.00034	0.022
MICRO.6180.C1	MICRO.6180.C1_1	CAC84709	17.2.3	hormone metabolism.auxin.induced-regulated-responsive-activated	NOT VALIDATED CAC84709: aux/IAA protein [Populus tremula x Populus tremuloides]	GAGAAATCATCATCATATTCATCTTCTGAAGCGCACAAAGCAGACAAAGCTACCCCACTT	7.9	7.2	7.7	7	6.5	6.9	0.8	0.00035	0.022
MICRO.6628.C1	MICRO.6628.C1_310	EAY84273	35.1	not assigned.no ontology	NOT VALIDATED EAY84273: hypothetical protein OsI_005506 [Oryza sativa (indica cultivar-group)]	TGCATCAGAAATCGGGCCAGAAGCAGGTTTATTTGAAATTTTGTCTCCTCGATCCTTGGA	7.9	8	8	7.3	6.7	7.5	0.8	0.00035	0.022
MICRO.6741.C1	MICRO.6741.C1_1822	NP_189150	10.4	cell wall.pectin synthesis	NOT VALIDATED NP_189150: QUA1 (QUASIMODO1); transferase, transferring glycosyl groups / transferase, transferring hexosyl groups [Arabidopsis thaliana]	AGGTGGTATCTTGTCTATCCAAGTCTTATTTATTTTCTCGAGCAGCAGTTTAGCTTTAGT	11	11.5	10.7	11.8	12	11.9	-0.8	0.00035	0.022
MICRO.712.C34	MICRO.712.C34_950	ABC01903	29.5.11.03	protein.degradation.ubiquitin.E2	NOT VALIDATED ABC01903: ubiquitin carrier-like protein [Solanum tuberosum]	CTTGTAAGCCTCGCAAACCTACTGTATGATCATATATTTAAATTGAAAAGAAGCAACAGC	14.5	13.7	14.9	13.1	13.3	13.2	1.1	0.00036	0.022
MICRO.7189.C1	MICRO.7189.C1_725	Q95661	20.2.1	stress.abiotic.heat	NOT VALIDATED Q95661: Small heat shock protein, chloroplast precursor	AAAGTGAGAAAAAGGTTGTTTTGATGTCCCAAATCAACTAAAATTTACCACTTCCCAAGC	6.4	6.4	6.4	6.9	7.8	7.7	-1	0.00033	0.022
MICRO.7225.C1	MICRO.7225.C1_113	ABD33007	35.1	not assigned.no ontology	NOT VALIDATED ABD33007: IQ calmodulin-binding region; Apoptosis regulator Bcl-2 protein, BAG [Medicago truncatula]	TTATCAATGGAAAATCTTTTCAATAGGTCTCAGCAAGATCGCCCTCGCTATTCCTCGAGA	10.5	9	11.5	9.1	7.4	8.1	2.1	0.00033	0.022
MICRO.76.C1	MICRO.76.C1_2126	AAQ08181	23.3	nucleotide metabolism.salvage	NOT VALIDATED AAQ08181: dCK/dGK-like deoxyribonucleoside kinase [Lycopersicon esculentum]	GAATTCATATTCAGACTAGCAGCATGTTTCCTCAGTGCATGTCTCTATATGTAGCAACGT	8.3	8.3	8.4	7.1	7	7.5	1.1	0.00035	0.022
MICRO.8079.C1	MICRO.8079.C1_1534	AAT40540	29.5.11.04.03.02	protein.degradation.ubiquitin.E3.SCF.FBOX	NOT VALIDATED AAT40540: kelch repeat-containing F-box family protein, putative [Solanum demissum]	GTCGCCATCTTGGCTTGTGTATCAGTACATTTTATTTCCTGCAGTTGGTGGTCCATAAAC	11.2	11.2	11.7	10.4	10.3	10.6	1	0.00036	0.022
MICRO.8691.C1	MICRO.8691.C1_901	NP_564594	34.12	transport.metal	NOT VALIDATED NP_564594: cation transporter/ efflux permease [Arabidopsis thaliana]	GCGCCTTGGAGAGATTAGATATCCATTATAAGCAGTGTAAAGAACGGTTCCTGGTTATTA	8.3	8.7	8.5	9.3	9.5	9.1	-0.8	0.00036	0.022
MICRO.9960.C1	MICRO.9960.C1_919	ABA18109	28.1.1.4	DNA.synthesis/chromatin structure.retrotransposon/transposase.hat-like transposase	NOT VALIDATED ABA18109: hAT-like transposase [Arabidopsis arenosa]	TTTTTGGTTAGTGTCGGAATGCATGAAAGCAGTTTTATTTTGGTGCATGATATGAGTATG	7.8	7.9	8.6	7.4	7	6.7	1.1	0.00034	0.022
POADC70TV	POADC70TV_433	NA	27.3.06	RNA.regulation of transcription.bHLH,Basic Helix-Loop-Helix family	NOT VALIDATED NA: NA	TTGTTGAAGGGGGTCCCCCCTAAAAGGGTACTTACCCTTTTACAACTTTTTCTTTTATAT	6.6	6.9	7	7.5	7.5	8.2	-0.9	0.00034	0.022
SDBN003O08u.scf	SDBN003O08u.scf_235	EAY80954	35.2	not assigned.unknown	NOT VALIDATED EAY80954: hypothetical protein OsI_034913 [Oryza sativa (indica cultivar-group)]	GAAACCTCTAGCTTGTCGTGCATTTAATCGAAGTAGCATTTAAGTGATTCTAAATATTGG	7.9	8.7	7.5	9.6	9.5	9.4	-1.5	0.00033	0.022
SDBN005G14u.scf	SDBN005G14u.scf_31	BAD95120	35.2	not assigned.unknown	NOT VALIDATED BAD95120: hypothetical protein [Arabidopsis thaliana]	AGGGTGATGATGCGTCAGCTAAGTTGTTAGCGAATTCAATTCAAAGGTTTGGGCAGATAT	8.7	8.5	8.2	8.1	7.2	7.2	1	0.00033	0.022
SSBT002N03x.scf	SSBT002N03x.scf_294	NP_974099	35.2	not assigned.unknown	NOT VALIDATED NP_974099: nucleic acid binding [Arabidopsis thaliana]	GAGGCAAATGGGATATCCACCAGGATATTTGGAAGAAGACGAGGATCAACCTTCTGGAAA	9.9	8.9	9.6	8.7	8.5	7.9	1.1	0.00034	0.022
STMGT54TV	STMGT54TV_691	NA	35.2	not assigned.unknown	NOT VALIDATED NA: NA	TCACTACTACTACGACACTGTTTTCGATCAGTCTATCTGCACGCACAGTTGTGTCTATTG	10.5	10.6	9.7	11.8	12.4	11.4	-1.6	0.00035	0.022
TBSK04689FG09.t3m.scf	TBSK04689FG09.t3m.scf_359	AAZ08244	20.1.07.06	stress.biotic.PR-proteins.proteinase inhibitors	NOT VALIDATED AAZ08244: putative Kunitz-type proteinase inhibitor PKI1 [Solanum tuberosum]	TTAGTTATACCAACTTTTGGAAACGTGGGAGATTACCGATGGCAGTCTCTAGGGACGATG	11.9	13.3	10.9	14.1	14.3	14.4	-2.2	0.00036	0.022
ACDA02366F02.T3m.scf	ACDA02366F02.T3m.scf_320	BAA04150	35.2	not assigned.unknown	NOT VALIDATED BAA04150: proteinase inhibitor [Solanum tuberosum]	TCCGGACAAGGTATCTCTTGAAAATGAACTAATCAACATCCAATTTCGCCATTTCAACAT	11.9	12.9	11	13.6	13.9	14.1	-1.9	0.00037	0.023
bf_arrayxxx_0046h07.t7m.scf	bf_arrayxxx_0046h07.t7m.scf_584	AAO22797	1.01.40	PS.lightreaction.cyclic electron flow-chlororespiration	NOT VALIDATED AAO22797: unknown protein [Arabidopsis thaliana]	GCTCACTGTCAGTTTCTCTGCTCAAAATTAGTTTTTCTTTGGCGATTTATGTATCTCTCA	9.2	9.6	9	10.4	9.8	10.2	-0.9	0.00039	0.023
bf_arrayxxx_0058a11.t7m.scf	bf_arrayxxx_0058a11.t7m.scf_1	NA	35.2	not assigned.unknown	NOT VALIDATED NA: NA	GGCACGAGGATTGGATATTCCTTGTGATCGAGTTCGTCTTTTTGATAACATCCTGGGGTC	13.3	14.2	13.1	14.9	15.2	14.9	-1.5	0.00041	0.023
bf_arrayxxx_0066f08.t7m.scf	bf_arrayxxx_0066f08.t7m.scf_340	ABI34329	35.2	not assigned.unknown	NOT VALIDATED ABI34329: Integrase core domain containing protein [Solanum demissum]	GGATCATGGGTCATGGACTCCGGCGCTTCTGATCATATTTCTGGTAACAAATCACTTATG	7.2	7.4	7.4	6.8	6.6	5.9	0.9	0.00039	0.023
bf_cswbxxxx_0004d10.t3m.scf	bf_cswbxxxx_0004d10.t3m.scf_13	NA	20.1.99	stress.biotic.misc	NOT VALIDATED NA: NA	ATCTTTGCCCTTATTATCGTGACATGAATTACTCATCATGGCAAGCATAAGTGTCCCTAA	10.7	11.9	10.5	9.5	9.8	9.8	1.4	0.00039	0.023
bf_lbchxxxx_0063h09.t3m.scf	bf_lbchxxxx_0063h09.t3m.scf_204	NA	35.2	not assigned.unknown	NOT VALIDATED NA: NA	TACTTATCTTATTCACCCTATGGATGCTTCTGCCTACACCTTCTAAATTCCTCTATGAAA	15.4	12.8	15.7	11.9	11.4	12.4	2.7	0.00039	0.023
bf_lbchxxxx_0065f01.t3m.scf	bf_lbchxxxx_0065f01.t3m.scf_257	ABC69417	26.1	misc.cytochrome P450	NOT VALIDATED ABC69417: CYP72A54 [Nicotiana tabacum]	GTGAACTTTTCTTCATTCTATCCACAAACAGGATTTGCTGTTTTTACAGCAATCTCAAGT	7.9	7.4	7.5	11.8	11.7	10.3	-3.7	0.0004	0.023
bf_mxflxxxx_0009c02.t3m.scf	bf_mxflxxxx_0009c02.t3m.scf_721	CAA63777	11.9.3	lipid metabolism.lipid degradation.lysophospholipases	NOT VALIDATED CAA63777: 1-phosphatidylinositol-4,5-bisphosphate phosphodiesterase; phosphoinositide-specific phospholipase C [Solanum tuberosum]	AGAAAACTGCACCTTCCATCGTAAACTCGGAATATGTACTGGAATTCAAATTACTTATCA	9	9.6	8.6	10.2	10.3	10.2	-1.2	0.00037	0.023
bf_mxlfxxxx_0018h11.t3m.scf	bf_mxlfxxxx_0018h11.t3m.scf_397	NA	35.2	not assigned.unknown	NOT VALIDATED NA: NA	CTTAATGTATTGACAACAATGTTTCCTCATTTAGATCCTTGAAGTCAAGGATCTCTTTGC	6.5	6.2	6.4	7.6	6.8	8	-1	0.00039	0.023
cPRO29E18TH	cPRO29E18TH_90	NA	35.2	not assigned.unknown	NOT VALIDATED NA: NA	AAACTTTCGGTCACAATACTCAATCAATTAAGGCCCCAGGACTTCTCCCGTTCTCTTGGA	10.3	8.7	10.4	8.4	8.4	8.2	1.4	0.00039	0.023
cSTA37O7TH	cSTA37O7TH_539	NP_199663	35.2	not assigned.unknown	NOT VALIDATED NP_199663: unknown protein [Arabidopsis thaliana]	AAGAAGGTCTCGAGTTGCAGCAACTTCTATTCTTAATGGACAGCAGGCTACCTCAGATGA	7.9	7.6	7.6	6.8	6.7	7	0.9	0.00037	0.023
cSTA45C12TH	cSTA45C12TH_422	ABO79060	35.2	not assigned.unknown	NOT VALIDATED ABO79060: Fgenesh protein 89, putative [Medicago truncatula]	AAGCATCTGCCAGACTCCTCATGGCTTCAATCCATTAGAAGGAACTTTATCCAAAAATCC	8.9	7.9	8.7	7.8	7.2	7	1.2	0.0004	0.023
cSTB17J1TH	cSTB17J1TH_492	BAD93690	26.02	misc.UDP glucosyl and glucoronyl transferases	NOT VALIDATED BAD93690: glycosyltransferase NTGT5b [Nicotiana tabacum]	AAAGGGAATTTTGCCTCTCAAAGATGAAAGTGACATTACAAATGGTTATTTGGACACGGT	7.8	7.3	8.3	6.6	6.9	6.7	1.1	0.00039	0.023
MICRO.10496.C1	MICRO.10496.C1_726	CAC00697	34.2	transporter.sugars	NOT VALIDATED CAC00697: putative sugar transporter [Solanum lycopersicum]	CAAGATGTGGGATCACATATTTTCATTTGTCGTACTCATTGATTATCTCACACTTAAAGC	8	8.3	8	6.9	6.8	6.8	1.3	0.00038	0.023
MICRO.1242.C1	MICRO.1242.C1_1822	NP_001066970	35.1	not assigned.no ontology	NOT VALIDATED NP_001066970: Os12g0548200 [Oryza sativa (japonica cultivar-group)]	GCTATCACGAATGTGCATGTTTACAATTCTCCGGCAATGTATTTAAAACCGAGTAGCTTT	9.9	10.7	9.9	11.1	11.3	11.2	-1	0.00037	0.023
MICRO.14213.C1	MICRO.14213.C1_850	AAM61028	35.2	not assigned.unknown	NOT VALIDATED AAM61028: unknown [Arabidopsis thaliana]	TGTTCGGCAACTGGAAGATGTTGTTGATGGTTCCAGCCTCGTGGGCTAGTAATTTCTTTT	6.4	5.8	6.6	7	7.4	8.4	-1.3	0.00037	0.023
MICRO.14691.C1	MICRO.14691.C1_265	NA	35.2	not assigned.unknown	NOT VALIDATED NA: NA	AAGCAAATTGATGATCACCAAGAGATTAGGATATTTAATGTTGATTTCAGGGCACTTTGC	6.8	6.8	6.6	7.8	7.6	7.2	-0.8	0.0004	0.023
MICRO.1504.C1	MICRO.1504.C1_650	AAW81736	31.1	cell.organisation	NOT VALIDATED AAW81736: Putative Acttin-related protein 4 (ARP4) [Brassica oleracea]	GCTTGATAAAAAGTTTGGAACAGAAAGCATTACGATAAAACCTAGTATTCATTCAAGCGG	8.4	7.7	8.2	7.5	6.6	7	1	0.00038	0.023
MICRO.15382.C1	MICRO.15382.C1_122	AAR20721	35.2	not assigned.unknown	NOT VALIDATED AAR20721: At5g43820 [Arabidopsis thaliana]	TTGCTTTAAAACTCAGTGCAACTGATGATTTAGGTGCACTTCAGCAACTGTTGGTTGATC	8.4	8.1	8.3	7	7.1	7.4	1.1	0.0004	0.023
MICRO.16464.C1	MICRO.16464.C1_633	ABA95805	29.5.11.04.02	protein.degradation.ubiquitin.E3.RING	NOT VALIDATED ABA95805: Zinc finger, C3HC4 type family protein, expressed [Oryza sativa (japonica cultivar-group)]	GTATCGCGTTCAGTCCGTTGCTCGGATTTTGATTTGGTAGATAACTTACTGCTCATAGCC	7.6	8.5	7.8	8.9	9.3	9.2	-1.2	0.0004	0.023
MICRO.1751.C20	MICRO.1751.C20_234	Q41484	20.1.07.06	stress.biotic.PR-proteins.proteinase inhibitors	NOT VALIDATED Q41484: Serine protease inhibitor 5 precursor (gCDI-B1)	CAAAATTCCAGAATGCCCCCTTTGTGGCAAATGGGTGTATTCCCGGTTTCAATTTCGGAT	11	12.1	9.9	13	13.2	13.7	-2.3	0.00037	0.023
MICRO.17590.C1	MICRO.17590.C1_53	NA	35.2	not assigned.unknown	NOT VALIDATED NA: NA	GTCAATTTTCGCCATTCCATTGCAGTTCCTGGCAGCAGCTAGGCATAAATTTACCTTGCT	9.9	9.2	9.1	8.6	7.7	8.3	1.2	0.0004	0.023
MICRO.1822.C1	MICRO.1822.C1_694	NP_194667	29.4	protein.postranslational modification	NOT VALIDATED NP_194667: ATP binding / protein kinase/ protein serine/threonine kinase [Arabidopsis thaliana]	GTTAGTGCATCTGACGATTCTACTGGTAAGGGTTTGGGATTCGAAAAAGCTAGAGAAGGA	8	8.1	7.1	6.8	6.7	6.7	1	0.00037	0.023
MICRO.1872.C2	MICRO.1872.C2_1065	Q40392	35.2	not assigned.unknown	NOT VALIDATED Q40392: TMV resistance protein N	TGAAAGCCTCTGGAACTCTTAGTAAGTCATCTCAGATGACAAAGAAAATGGATCAAACAT	7.9	8.7	8.5	7	7.6	6.8	1.2	0.00039	0.023
MICRO.2055.C1	MICRO.2055.C1_629	AAZ05072	35.1	not assigned.no ontology	NOT VALIDATED AAZ05072: hypoxia-responsive family protein [Citrus sinensis]	GATTTTTGTGTGGTTTATTTACAGATAATGATTCATCGAAAGTGCCCTTCTTAGCAGTAC	12.6	10.1	13.7	9.7	8.3	9	3.1	0.00039	0.023
MICRO.3011.C1	MICRO.3011.C1_1006	NP_190782	35.1.5	not assigned.no ontology.pentatricopeptide (PPR) repeat-containing protein	NOT VALIDATED NP_190782: unknown protein [Arabidopsis thaliana]	TGGGCTCTTGCAAAAGATCAGCTCCAGATTTAAGAAAGCTTTTCGGGAGATATTGGAGCG	7.4	7.8	7.2	6.6	6.7	6.8	0.8	0.00037	0.023
MICRO.331.C82	MICRO.331.C82_1227	AAA80589	1.01.01.02	PS.lightreaction.photosystem II.PSII polypeptide subunits	NOT VALIDATED AAA80589: chlorophyll a/b binding protein	TTTGTTCCCGGAAAGTGAAGATCTCAAATTTTCATGCAAAGTTGTTGTGAATGAGTTGAC	9.8	9.7	7.7	12.4	10.5	11.9	-2.5	0.00038	0.023
MICRO.3349.C2	MICRO.3349.C2_1393	AAX11392	17.1.3	hormone metabolism.abscisic acid.induced-regulated-responsive-activated	NOT VALIDATED AAX11392: bZIP transcription factor [Malus x domestica]	TTTAACATCCAGTTTCATGCACGAATGATGAATATGTAGATGCGTAGTGTTCGTTATGTC	10.7	10.3	10.9	10	9.9	10	0.7	0.00038	0.023
MICRO.3389.C1	MICRO.3389.C1_793	NA	35.2	not assigned.unknown	NOT VALIDATED NA: NA	GGTTGTTGATTATGGTGGTTTATTATATTGGTGATGAAGTTGGTTCTGAAGGGAATAACA	11.9	9.7	10.4	9.1	7.1	7.4	2.8	0.00039	0.023
MICRO.3536.C1	MICRO.3536.C1_670	ABH03018	17.2.1	hormone metabolism.auxin.synthesis-degradation	NOT VALIDATED ABH03018: resveratrol/hydroxycinnamic acid O-glucosyltransferase [Vitis labrusca]	TTGTATACTAATGGATACATTCCAAGAACTCGAACTCGAGCTCGTTGATCAGCTTTCCAA	7.5	8.8	8	6.6	6.6	6.5	1.5	0.0004	0.023
MICRO.37.C3	MICRO.37.C3_1337	CAB92956	31.1	cell.organisation	NOT VALIDATED CAB92956: annexin p34 [Solanum tuberosum]	TTACAATATCTTCAACTACGCCTCAGTTTCAAGCAAGTTGAGATCTATCAATGTCACTTC	12.9	13.1	12.9	13.8	14	13.6	-0.8	0.00038	0.023
MICRO.4200.C1	MICRO.4200.C1_1704	AAM61500	35.1	not assigned.no ontology	NOT VALIDATED AAM61500: hydrolase-like protein [Arabidopsis thaliana]	CACAGCATTTCTTGCATCAGATGGATGAGACTCTGGCAGTCCCATTTTGTTTGGTGAACT	7.2	7.5	7.5	6.8	6.6	6.9	0.6	0.00037	0.023
MICRO.4371.C1	MICRO.4371.C1_939	BAE48085	16.8.2	secondary metabolism.flavonoids.chalcones	NOT VALIDATED BAE48085: chalcone isomerase [Nicotiana tabacum]	TGCTCATTAAGGGGAATCATAACTGTGAAAGCTACGACGTTGGGCCAGGAGTTTAGCTTT	7.5	7.6	7.2	8.1	8.2	8	-0.7	0.00039	0.023
MICRO.5397.C1	MICRO.5397.C1_808	NA	35.2	not assigned.unknown	NOT VALIDATED NA: NA	GATTTTACAATTACGTAAACGATACAATGCCACCAATCGGTGGGATTTCTGTCCGTCTTC	8.4	7.9	7.9	7	7.4	6.6	1.1	0.00039	0.023
MICRO.6405.C3	MICRO.6405.C3_1227	AAX11684	17.2.3	hormone metabolism.auxin.induced-regulated-responsive-activated	NOT VALIDATED AAX11684: perakine reductase [Rauvolfia serpentina]	TATCTTAAAATCTGCATTTCAACGATACATGTTGCCATGTTTGACCTTTAAAGCCTAAGC	7.6	7.2	7.2	8.3	8.5	8.3	-1	0.00037	0.023
MICRO.6657.C2	MICRO.6657.C2_593	AAL69367	27.3.99	RNA.regulation of transcription.unclassified	NOT VALIDATED AAL69367: unknown [Narcissus pseudonarcissus]	TCGTCAATGCACAATCAGATGAGTATACCTCTGTACATGGACTTATGGTTCCTACTCGTT	9.7	9	9.7	8.6	8.2	8.5	1	0.0004	0.023
MICRO.721.C2	MICRO.721.C2_787	ABN05728	35.1	not assigned.no ontology	NOT VALIDATED ABN05728: Octicosapeptide/Phox/Bem1p [Medicago truncatula]	TTCACTTGAAGAAAAAGGATAGGATGAGTTTAATATAAAGTTTGCCACTAAATACTGTAT	8.1	8.3	8.4	7.6	6.9	7.3	1	0.00037	0.023
MICRO.7372.C1	MICRO.7372.C1_606	AAB30525	20.2.1	stress.abiotic.heat	NOT VALIDATED AAB30525: small heat-shock protein homolog [Solanum tuberosum]	GTTAGAGAAGAGCTTTGATTTTATGAGTTACTCTGTTTTCTGTTCATCATCTGTTCCTCT	11.8	8.7	15	7.9	7.1	7.6	4.3	0.0004	0.023
MICRO.801.C2	MICRO.801.C2_5	P43349	35.1	not assigned.no ontology	NOT VALIDATED P43349: Translationally-controlled tumor protein homolog (TCTP) (p23)	TTTTTTCCTCTCTCTTCTTATTGTACTCCTCTTCCCTTTTAGAGAGAGAAAGCAAAAGGT	12.8	12.1	12.5	11.4	11.2	11.6	1.1	0.00038	0.023
MICRO.8019.C1	MICRO.8019.C1_689	ABE77669	11.1.08	lipid metabolism.FA synthesis and FA elongation.acyl coa ligase	NOT VALIDATED ABE77669: AMP-dependent synthetase and ligase [Medicago truncatula]	AGTTTATCCAAAAACATATTTGAGAACATAGCAGAGCACAGGTCCACACATGAGTGGGGC	6.9	6.7	6.8	7.5	7.2	8.2	-0.8	0.00038	0.023
MICRO.9133.C2	MICRO.9133.C2_1	BAA04633	1.01.02.02	PS.lightreaction.photosystem I.PSI polypeptide subunits	NOT VALIDATED BAA04633: PSI-H precursor [Nicotiana sylvestris]	CTAATTTCCTAGTCTGAAACAGAGTTCAATAATGGCGTCTATGGCAACTCTTACTGCAGT	7.1	6.7	6.7	8.3	7.6	9.1	-1.5	0.0004	0.023
MICRO.9155.C1	MICRO.9155.C1_981	ABI97246	27.3.02	RNA.regulation of transcription.Alfin-like	NOT VALIDATED ABI97246: PHD1 [Glycine max]	TGCAGTTCATCTGGAGCATATGTTGCAGCTGTAGTTTTTGGGTGCTCCTTGTTTGATCAT	9.9	8.8	10.3	8.8	8.2	7.4	1.5	0.00041	0.023
POABL93TP	POABL93TP_890	EAZ04002	27.1.2	RNA.processing.RNA helicase	NOT VALIDATED EAZ04002: hypothetical protein OsI_025234 [Oryza sativa (indica cultivar-group)]	TCGAGCTGGTAGAACTGGCCCAGGGACTTGTTACAGACTTTATACAGAGAATGCTTATGA	8.4	7.9	7.6	7.1	6.8	6.8	1.1	0.0004	0.023
POCAD20TP	POCAD20TP_955	NP_001056684	35.2	not assigned.unknown	NOT VALIDATED NP_001056684: Os06g0129800 [Oryza sativa (japonica cultivar-group)]	TATTGGTCACGAAAAAAGTTTAACAGAAAGAAAATGGACAAGGAAGTGGAGACTCGGCTT	8.8	8.1	8.5	8	7.1	7.1	1.1	0.00038	0.023
SDBN002C01u.scf	SDBN002C01u.scf_556	NA	27.3.35	RNA.regulation of transcription.bZIP transcription factor family	NOT VALIDATED NA: NA	TGATACGTGAGGAATCTTGTTATTGCAGTTCTTCCTTCTAATGACCGATGTAACTATGAT	7	6.7	7.8	8.2	8.4	8.2	-1	0.00039	0.023
STMHL01TV	STMHL01TV_357	BAC42936	26.02	misc.UDP glucosyl and glucoronyl transferases	NOT VALIDATED BAC42936: unknown protein [Arabidopsis thaliana]	GCACAACCGAGTTTTTGGAATAAGAGATAGGTAATAAATGTAGATATACACTAGAGGTTG	7.8	8.7	7.7	9	9.5	9.6	-1.3	0.00037	0.023
052F08AF.esd	052F08AF.esd_379	NA	35.2	not assigned.unknown	NOT VALIDATED NA: NA	CCTAGGAGGGTGGAGACTAATGATAATCAATATGCTCACCGGAGATCAAGTAACAAATTT	7.4	7.5	7.3	6.8	6.8	6.8	0.6	0.00041	0.024
bf_acdaxxxx_0055b10.t3m.scf	bf_acdaxxxx_0055b10.t3m.scf_548	NA	35.2	not assigned.unknown	NOT VALIDATED NA: NA	TAGAATGCTAATGAGCTGGGCTAGCTTGCAGCTATTCTAAACTAAAGTGGGGACTGTAAT	14.2	14.9	13.4	15.4	15.5	15.7	-1.3	0.00042	0.024
bf_acdaxxxx_0060e08.t3m.scf	bf_acdaxxxx_0060e08.t3m.scf_114	AAF15901	20.1.07.06	stress.biotic.PR-proteins.proteinase inhibitors	NOT VALIDATED AAF15901: putative proteinase inhibitor [Nicotiana glutinosa]	AAGATAGACGAGGAGTACTCCATTATCAGTATTCCCTATACTTAGCTAATCTTGGAAACA	12.4	13.4	11.4	13.9	14.3	14.6	-1.9	0.00042	0.024
bf_arrayxxx_0061g06.t7m.scf	bf_arrayxxx_0061g06.t7m.scf_533	NP_188813	26.02	misc.UDP glucosyl and glucoronyl transferases	NOT VALIDATED NP_188813: UDP-glycosyltransferase/ transferase, transferring glycosyl groups [Arabidopsis thaliana]	GTTGGGGAAATTATGAGCATGTAGGACATTGTGACTGCCAAAGGAAATTGAAAGTGGCAT	10.4	10.2	10.5	8.8	8.9	9	1.5	0.00044	0.024
bf_arrayxxx_0093h12.t7m.scf	bf_arrayxxx_0093h12.t7m.scf_215	NA	35.2	not assigned.unknown	NOT VALIDATED NA: NA	AAGTACACGGTTTAGCTTAACCAGCTGCTGTTAAGGGAAAAAATTGCCTTTTATGTACCA	7.1	7.3	8.1	6.4	6.8	6.4	1	0.00043	0.024
bf_cswbxxxx_0033g04.t3m.scf	bf_cswbxxxx_0033g04.t3m.scf_248	NA	35.2	not assigned.unknown	NOT VALIDATED NA: NA	AGAGAGGGATAATCACCTCTTTTCCAAGAAAACTATGGGAGTCCACGCAAACGCTTTGTT	8.1	8.9	7.5	9.5	9.6	10.6	-1.7	0.00042	0.024
bf_ivrootxx_0060c10.t3m.scf	bf_ivrootxx_0060c10.t3m.scf_446	AAT11172	11.9.4.02	lipid metabolism.lipid degradation.beta-oxidation.acyl CoA DH	NOT VALIDATED AAT11172: putative short-chain acyl-CoA oxidase [Tropaeolum majus]	CTTCTCTGGGCAGTAAGTATTCTGCTCAATAATGTTCTGTTTAGGTAATTGTAACTATAG	10.3	8.9	9.5	8.7	8.1	8	1.3	0.00043	0.024
MICRO.10204.C2	MICRO.10204.C2_777	NP_568700	35.2	not assigned.unknown	NOT VALIDATED NP_568700: unknown protein [Arabidopsis thaliana]	GATTTCCCTTTAACTTCTGTTGCAAACAGTATGTTTCTTCTTGGAAGTAATTTGATGTCC	7.8	9	7.4	9.4	9.8	10	-1.7	0.00042	0.024
MICRO.109.C8	MICRO.109.C8_724	NP_181528	29.2.3	protein.synthesis.initiation	NOT VALIDATED NP_181528: EIF2; translation initiation factor [Arabidopsis thaliana]	AAGCCTCAATGCAAAGATTACTTGCTCTGATTGATGACATCTACCAATATGTTGATGATG	10.4	10.2	10.8	9.8	9.7	9.6	0.8	0.00043	0.024
MICRO.12878.C1	MICRO.12878.C1_1607	AAZ81522	17.2.3	hormone metabolism.auxin.induced-regulated-responsive-activated	NOT VALIDATED AAZ81522: auxin response factor 2 [Gossypium arboreum]	TAAAGTCCTTGAAATATGTATGTAGTGTTGGAGTGTATAGTTGTTCAGAATGTTCTCTGG	9.4	10	9.1	10.6	11.3	11	-1.4	0.00041	0.024
MICRO.1389.C4	MICRO.1389.C4_522	AAX73303	16.4.2	secondary metabolism.N misc.betaine	NOT VALIDATED AAX73303: putative betaine aldehyde dehyrogenase [Lycopersicon esculentum]	GCTTGGGGAATGGAGTCTCGAGAACTACCTAAACATTAAACAGGTGACTCAGTATGTGAC	11.4	12.7	10.9	13.3	13.5	12.7	-1.5	0.00042	0.024
MICRO.1570.C3	MICRO.1570.C3_866	AAR05449	13.1.1.3	amino acid metabolism.synthesis.central amino acid metabolism.alanine	NOT VALIDATED AAR05449: alanine aminotransferase [Capsicum annuum]	CATATCCTCTTTATTCGCTTCATTGCTCTCATGGTGCACTCTCGTTCCTTATATCTGATG	10.5	7.8	10.7	7.6	7	7.1	2.4	0.00042	0.024
MICRO.16495.C1	MICRO.16495.C1_832	ABE88271	35.1.3	not assigned.no ontology.armadillo/beta-catenin repeat family protein	NOT VALIDATED ABE88271: Armadillo [Medicago truncatula]	CAGGTCAAGGGTTTAAATAAAACCTCCTGACCATTAGTAATAACTTCTCTCAACTTCTAT	11	10.8	9.7	9	8.4	8.4	1.9	0.00042	0.024
MICRO.779.C21	MICRO.779.C21_36	NP_196882	13.2.2.1	amino acid metabolism.degradation.glutamate family.glutamine	NOT VALIDATED NP_196882: N-acetyltransferase [Arabidopsis thaliana]	GTCCTGACGCAATAATGTTCCTCAGTTAGAATGATTCTAACAATAAGATCCAATTTTTGC	7.3	8.4	7	6.6	6.3	6.4	1.1	0.00042	0.024
MICRO.8355.C2	MICRO.8355.C2_1111	NP_565538	17.1.3	hormone metabolism.abscisic acid.induced-regulated-responsive-activated	NOT VALIDATED NP_565538: unknown protein [Arabidopsis thaliana]	AGGCGTGTTTTATGAGATGATGGCGTGCTTCGCGATGCCAAAAATGTCACCTTCATACAT	7.4	8.4	7.3	8.7	8.9	9.1	-1.2	0.00042	0.024
MICRO.8764.C2	MICRO.8764.C2_847	ABE87377	35.1	not assigned.no ontology	NOT VALIDATED ABE87377: hypothetical protein MtrDRAFT_AC152347g10v2 [Medicago truncatula]	TTCTCCCTTGTACATATGGTGTTGTTGCAGTAACTGATTGCAATTGAAGGACAATTTGAA	14.1	13.2	15.1	13	12.6	12.5	1.4	0.00042	0.024
MICRO.9297.C1	MICRO.9297.C1_871	NA	35.2	not assigned.unknown	NOT VALIDATED NA: NA	CTCTGGGTGTGGCAATTGTAAGCACTTGGCCTTCTTCTTTCCTCTGTTTCCTTTTGTCAA	7.7	7.6	7.5	8	8.5	8.2	-0.7	0.00043	0.024
MICRO.987.C3	MICRO.987.C3_1200	ABC01895	29.3.4.99	protein.targeting.secretory pathway.unspecified	NOT VALIDATED ABC01895: transporter-like protein [Solanum tuberosum]	AATGATTGCTCCAATGACAAAGCTCAGCTCTTATATGCCTAAGTTTAATAAATAGTGAGG	8.6	9.6	8.5	10.1	10.2	9.9	-1.1	0.00041	0.024
POCAN83TV	POCAN83TV_488	BAC23039	13.2.2.3	amino acid metabolism.degradation.glutamate family.arginine	NOT VALIDATED BAC23039: arginine decarboxylase [Solanum tuberosum]	GAAGGGTTTTGTTAGCATTTCCAGTTTGTTTTAGTTTGTGGTGGGGGTGGTTTGTTTTTT	7.9	7.8	7.9	8.5	9.1	8.8	-0.9	0.00041	0.024
POCCB30TP	POCCB30TP_917	CAB45511	34.7	transport.phosphate	NOT VALIDATED CAB45511: putative protein [Arabidopsis thaliana]	GTCTTCGTCGCTTATTTGAGAGAAAGATTCGATGCAAAGGGTTAATAGCCTCAAATATTT	7.6	8.1	8.2	7.2	7	7.3	0.8	0.00041	0.024
SDBN005G12u.scf	SDBN005G12u.scf_705	NA	35.2	not assigned.unknown	NOT VALIDATED NA: NA	TTGTTCCACTTCCCCGCACCATCAACAACGTTTGTTCTTTTAAAGATTGCCCTTTTCAAA	7.5	7.9	8	6.9	6.6	6.9	1	0.00043	0.024
STMCF94TV	STMCF94TV_458	NP_671784	35.1	not assigned.no ontology	NOT VALIDATED NP_671784: N-acetyltransferase [Arabidopsis thaliana]	TGGACTAGGGAACGGGTACGTATTGGATACATGTTTATTTGAGTATCCTATACGAGCATA	9.6	9.2	9.5	8.9	8.1	8.4	1	0.00042	0.024
STMCI55TH	STMCI55TH_592	Q08304	35.2	not assigned.unknown	NOT VALIDATED Q08304: Polyphenol oxidase B, chloroplast precursor (PPO) (Catechol oxidase)	TTCTTTGGTGCACGTTACGTTCTCGGGATAACATCGAAGCTCCGGGAACCATTGAAATAT	6.8	6.2	6.6	7.3	7.3	7.2	-0.7	0.00042	0.024
033A12AF.esd	033A12AF.esd_684	NA	35.2	not assigned.unknown	NOT VALIDATED NA: NA	TTTAACAAAGAGATATATGGGACTAGCTCTGGCAAAGTGGATTATTTGGGTCACTGCATG	7.7	7.4	7.8	6.7	7	6.8	0.8	0.00046	0.025
101C10AF.esd	101C10AF.esd_176	1803516A	1.02.02	PS.photorespiration.glycolate oxydase	NOT VALIDATED 1803516A: glycolate oxidase	TATAAGGACAGAAATGGTTAACAAATTCCAGTGGGTGCGAAAGAGCTGAAAGGGCAGGTT	7.3	7	7.5	7.9	8.6	8	-0.9	0.00048	0.025
154H04AF.esd	154H04AF.esd_268	ABN05856	27.4	RNA.RNA binding	NOT VALIDATED ABN05856: KH, type 1 [Medicago truncatula]	AACGTGAGGAATGCCCTTATTCAACTTACTGTTCAAGGATAGAATGAATAGCAAGATGGG	8.7	8.3	8.2	7.4	7.8	6.9	1	0.00044	0.025
ACDA01127F11.T3m.scf	ACDA01127F11.T3m.scf_54	NA	35.2	not assigned.unknown	NOT VALIDATED NA: NA	ATCATGAATTTCCCCGTTCTATGCTTCACTCGGAATTCCCTCGATCTATCCCCAAATTCT	8	7.8	7.6	6.5	7.3	6.9	0.9	0.00044	0.025
bf_arrayxxx_0023c07.t7m.scf	bf_arrayxxx_0023c07.t7m.scf_554	AAT39932	35.2	not assigned.unknown	NOT VALIDATED AAT39932: NB-ARC domain containing protein [Solanum demissum]	GAATGTATGAGCAAGACCTACATTTTTTCTTAATCAGTATATTGAAAACTGTCCACTCGC	7.5	7.1	7.5	8	8.3	8.4	-0.9	0.00046	0.025
bf_ivrootxx_0002c04.t3m.scf	bf_ivrootxx_0002c04.t3m.scf_611	NP_197833	27.3.67	RNA.regulation of transcription.putative DNA-binding protein	NOT VALIDATED NP_197833: unknown protein [Arabidopsis thaliana]	ACAATCTTGTACAACCTTGGGCTCGAAAAGAAAACAAGAGGGACGACACAATTGGGAGAG	8.4	7.3	7.9	6.6	6.8	6.7	1.2	0.00046	0.025
bf_ivrootxx_0031a02.t3m.scf	bf_ivrootxx_0031a02.t3m.scf_447	CAC43323	29.5.11.20	protein.degradation.ubiquitin.proteasom	NOT VALIDATED CAC43323: putative alpha7 proteasome subunit [Nicotiana tabacum]	TTTTTCCACCACTGTGATGATGAAAGCGATCTATAGTATCTTGTAATTCTGAACTGTAAG	10.1	10.9	10.1	11.4	11.3	11.1	-0.9	0.00044	0.025
bf_ivrootxx_0054h06.t3m.scf	bf_ivrootxx_0054h06.t3m.scf_300	NP_179266	29.4.1.56	protein.postranslational modification.kinase.receptor like cytoplasmatic kinase VI	NOT VALIDATED NP_179266: ATP binding / kinase/ protein kinase/ protein serine/threonine kinase/ protein-tyrosine kinase [Arabidopsis thaliana]	GTTGGCAATCGCAGAAGCTTTAAAGTTACCTACACAATGAATGTCGAAGGCCTGTTATTC	7.8	8.3	8.2	7.6	6.5	7.2	1	0.00044	0.025
BF_LBCHXXXX_0001B07_T3M.SCF	BF_LBCHXXXX_0001B07_T3M.SCF_210	AAK38843	17.4.2	hormone metabolism.cytokinin.signal transduction	NOT VALIDATED AAK38843: histidine-containing phosphotransfer protein [Catharanthus roseus]	GCAATTCCCATGGTGCAATAACTCAATGCTTACGGGATTATTAGCCCTAGTGAAGGAAAA	14.3	13.4	14.3	13	12.8	13.3	1	0.00048	0.025
BF_LBCHXXXX_0020D02_T3M.SCF	BF_LBCHXXXX_0020D02_T3M.SCF_138	AAU10839	26.22	misc.short chain dehydrogenase/reductase (SDR)	NOT VALIDATED AAU10839: unknown protein [Oryza sativa (japonica cultivar-group)]	ATGCAATTCGATGGTCAATGCAGAAAACAGATAAACCATTCTGCTCCACTGGCCCCATTT	6.5	6.9	7	7.5	8.1	7.3	-0.8	0.00046	0.025
bf_mxflxxxx_0008d05.t3m.scf	bf_mxflxxxx_0008d05.t3m.scf_529	NA	35.2	not assigned.unknown	NOT VALIDATED NA: NA	ATTTCTCTGCTCTTGTGAACTCACTTTTTGATGTGATTTTTGCCTTGATTTCAGTATGAG	6.7	6.3	6.6	7.6	7.1	7.1	-0.8	0.00046	0.025
bf_mxflxxxx_0032a10.t3m.scf	bf_mxflxxxx_0032a10.t3m.scf_78	NA	35.2	not assigned.unknown	NOT VALIDATED NA: NA	TTTTGACTCGCCCTTAGCTCTATTAAGTTTCTAGCATATCAGGGTTCAGGGTGAGCTATT	7.7	6.5	7.9	8.5	8.5	8.4	-1.1	0.00046	0.025
bf_stolxxxx_0042c03.t3m.scf	bf_stolxxxx_0042c03.t3m.scf_251	NA	27.3.06	RNA.regulation of transcription.bHLH,Basic Helix-Loop-Helix family	NOT VALIDATED NA: NA	TTCCCTTCTCAGCCCAATCAGTCTTTGCAGCAAATGATGCATATCTTGGCTACCTGGAAT	7.4	7.3	7.3	7.7	8.1	8.3	-0.7	0.00045	0.025
cPRO1G6TH	cPRO1G6TH_526	NA	35.2	not assigned.unknown	NOT VALIDATED NA: NA	TTCTATCACTGTGGATAATCCAAGCTCACTGTGACTATCTGCATGCTGCTAGAATCAGTT	6.6	7	6.6	7.1	8.1	7.6	-0.8	0.00046	0.025
cSTA14G3TH	cSTA14G3TH_468	NP_566961	33.99	development.unspecified	NOT VALIDATED NP_566961: nucleotide binding [Arabidopsis thaliana]	AGCCAGCTTCCATTATGACAATCAGTTTGGACGGGAAATATCTCGCATTGGGAAGCAAAG	9.2	8.8	9	8.4	8.3	8.2	0.7	0.00047	0.025
cSTB47O2TH	cSTB47O2TH_371	NA	35.2	not assigned.unknown	NOT VALIDATED NA: NA	TCTCAGTTGTTTTCTCATGGCGTGAAATGCAACTTGGTATTTGCCTTGTCATCTCCTATT	6.5	5.9	6.3	6.9	7.3	7	-0.8	0.00047	0.025
cSTD16F10TH	cSTD16F10TH_723	NP_188866	35.2	not assigned.unknown	NOT VALIDATED NP_188866: unknown protein [Arabidopsis thaliana]	TAAAAGATGACATTTGGATTTCTATGGGTTGGTGGTCTCTTCCAAAGGGCCGGAAGCTCA	7.2	7.4	7.1	6.7	6.6	6.7	0.6	0.00044	0.025
MICRO.10137.C2	MICRO.10137.C2_1119	NP_199587	35.1	not assigned.no ontology	NOT VALIDATED NP_199587: ATPK5; phosphoglycolate phosphatase [Arabidopsis thaliana]	GGGACTACACTGACATGTTGTGGTTGTTGTATAACTCTGTTTAAGTTAAGGAAAGCTTTT	9	9.1	8.8	9.7	9.8	9.6	-0.7	0.00045	0.025
MICRO.10199.C1	MICRO.10199.C1_722	NA	35.2	not assigned.unknown	NOT VALIDATED NA: NA	TATGCCTACATTGCTTAAATCGTAAACCCTACAAGCACATTAAAATATATCTTAAGCGGC	7.4	7.4	7.3	6.6	6.8	6.6	0.7	0.00044	0.025
MICRO.10906.C1	MICRO.10906.C1_406	AAF89579	26.13	misc.acid and other phosphatases	NOT VALIDATED AAF89579: phosphatidic acid phosphatase alpha [Vigna unguiculata]	CCACAGCATTTTAGGCATCTTATTTGCTATACTAATTACAGCTGTAATTACTGAAGCCAT	8.6	8.2	8.4	6.8	6.7	7.8	1.3	0.00049	0.025
MICRO.10980.C1	MICRO.10980.C1_159	NA	35.2	not assigned.unknown	NOT VALIDATED NA: NA	GGACGCTAATGAGGCATCCTCCGATCCTCTTGAGATGGAGGGGATGAGGTATGCGGGATA	6.4	5.9	6	7	6.6	6.9	-0.7	0.00049	0.025
MICRO.11081.C2	MICRO.11081.C2_1138	ABE94112	35.2	not assigned.unknown	NOT VALIDATED ABE94112: Heavy metal transport/detoxification protein; Harpin-induced 1 [Medicago truncatula]	TCCTAGAATTGTGAAGAAAGTTGGGTTGGAATTGTAAGTTCTTTTCGATTATGCGTTTAG	6.9	6.8	7.3	8.5	8.9	8.1	-1.5	0.00045	0.025
MICRO.11362.C1	MICRO.11362.C1_494	ABE91408	27.3.37	RNA.regulation of transcription.AS2,Lateral Organ Boundaries Gene Family	NOT VALIDATED ABE91408: Protein of unknown function DUF260 [Medicago truncatula]	GAATTTGGCCAATTCCCATTTCCATGATCCTTCTCTATTTAATGTACGTTTACGCATTTC	7.7	8.7	7.7	9.3	9.6	10.4	-1.8	0.00048	0.025
MICRO.11866.C1	MICRO.11866.C1_590	NP_563834	29.4	protein.postranslational modification	NOT VALIDATED NP_563834: SNF4 [Arabidopsis thaliana]	TAACAGAATGGCGATGAAGGTGTTGGTTAGCTGTGTAGTTTCTTATGATGCTGTGGTTGC	8.6	10.1	8.8	10.7	10.8	10.1	-1.3	0.00048	0.025
MICRO.1238.C2	MICRO.1238.C2_1242	P26320	1.01.01.02	PS.lightreaction.photosystem II.PSII polypeptide subunits	NOT VALIDATED P26320: Oxygen-evolving enhancer protein 1, chloroplast precursor (OEE1) (33 kDa subunit of oxygen evolving system of photosystem II) (OEC 33 kDa subunit) (33 kDa thylakoid membrane protein)	ACTTAGATTTGCTAAGTGTTCATCTCAAAGTTGTATGCAATCTATATTGCCTAGACTCTG	8.5	7.8	8.5	9.3	9	9.3	-0.9	0.00046	0.025
MICRO.12637.C3	MICRO.12637.C3_765	NA	35.2	not assigned.unknown	NOT VALIDATED NA: NA	AGTTCCATTTTGATTACAATCAATACTTTCTGACCATTTGCATGATTGTTACTAGCTCCC	6.1	6.1	6.2	6.6	7.2	6.9	-0.8	0.00045	0.025
MICRO.12937.C1	MICRO.12937.C1_794	NP_563628	35.2	not assigned.unknown	NOT VALIDATED NP_563628: unknown protein [Arabidopsis thaliana]	CTGAGTTCTGACTGAAGCGGATACTGTACAAATTACTAATAAAAGGAATAGTTTCTTCTG	9	8.3	9.5	8.2	7.9	7.6	1.1	0.00046	0.025
MICRO.13606.C3	MICRO.13606.C3_423	AAF98368	33.1	development.storage proteins	NOT VALIDATED AAF98368: patatin-like protein 1 [Nicotiana tabacum]	AATCCAGAAATCCCAAAGTACCTACTACAAATAAATTGTAGAGGCAAAATCGTGATTTGG	10.9	12.9	10.1	12.9	13.7	14	-2.2	0.00044	0.025
MICRO.13980.C1	MICRO.13980.C1_545	BAD29468	29.5.11.04.02	protein.degradation.ubiquitin.E3.RING	NOT VALIDATED BAD29468: ring zinc finger protein-like [Oryza sativa (japonica cultivar-group)]	TTAGCGATTCCTCTCCAATTTTGAATTCTGAGCAGAGAAACGCTACCGGAGGTTGGAACA	8.5	8.5	8.2	8.1	7.2	6.8	1	0.00048	0.025
MICRO.15073.C1	MICRO.15073.C1_1611	BAB11372	28.1	DNA.synthesis/chromatin structure	NOT VALIDATED BAB11372: unnamed protein product [Arabidopsis thaliana]	TTCAGCCAAAATAGGTCGAGCTTCTGGTAGTTTGTGTTGTCATATCCTTGAACATCTCTT	6.9	7	6.6	7.2	7.9	7.7	-0.8	0.00046	0.025
MICRO.15708.C1	MICRO.15708.C1_982	ABO83603	26.03	misc.gluco-, galacto- and mannosidases	NOT VALIDATED ABO83603: Glycoside hydrolase, family 1 [Medicago truncatula]	AGTTAAGCTCAAGCCTTACCTTGTATTCACTTCTATGGAACTGTAATCATGTAAACAAGA	11.2	12.6	10	13	13.6	13.2	-2	0.00048	0.025
MICRO.16810.C1	MICRO.16810.C1_846	AAM62602	35.2	not assigned.unknown	NOT VALIDATED AAM62602: unknown [Arabidopsis thaliana]	GTCTTCTATTGGTGTTATAACATGGTAAAATGTATCAGTGAACGTTCCACCGTCTGTTCA	8.1	9.5	7.7	9.9	11	9.7	-1.8	0.00045	0.025
MICRO.1689.C3	MICRO.1689.C3_1473	CAA70038	2.1.2.03	major CHO metabolism.synthesis.starch.starch branching	NOT VALIDATED CAA70038: 1,4-alpha-glucan branching enzyme [Solanum tuberosum]	AGATAGTAAGCAGCATGGATGATGATAATAAGGTTGTTGTGTTTGAACGTGGTGACCTGG	9.6	11.5	8.5	13.2	12.9	12.8	-3.1	0.00048	0.025
MICRO.1689.C4	MICRO.1689.C4_21	CAA70038	2.1.2.03	major CHO metabolism.synthesis.starch.starch branching	NOT VALIDATED CAA70038: 1,4-alpha-glucan branching enzyme [Solanum tuberosum]	CAGATAGTAAGCAGCATGGATGATGATAATAAGTTGTTGTGTTTGAACGTGGTGACCTGG	9.4	11.3	8.4	13	12.6	12.5	-3	0.00049	0.025
MICRO.17142.C1	MICRO.17142.C1_306	NP_178250	35.2	not assigned.unknown	NOT VALIDATED NP_178250: unknown protein [Arabidopsis thaliana]	GGATAAGAGAGTAGCTTAGGTTTTGATTATTTTATTTTTACTTGTTTTGTTGTAATTTAT	7.5	8.2	7.7	9.1	9.2	8.5	-1.1	0.00047	0.025
MICRO.18091.C1	MICRO.18091.C1_234	AAX53091	35.2	not assigned.unknown	NOT VALIDATED AAX53091: anthocyanin 2 [Solanum tuberosum]	CAAACCCGATATCTCTGATTAAGAATGAAAGAGTGCTTATTACTCCGACATATCCCTGGT	8.4	10.4	8.2	11.1	10.9	11.7	-2.3	0.00049	0.025
MICRO.3400.C3	MICRO.3400.C3_926	AAX83944	29.5.11.04.03.01	protein.degradation.ubiquitin.E3.SCF.SKP	NOT VALIDATED AAX83944: Skp1 [Capsicum annuum]	TGAACAACACTAGAGAAACGCTCTTATTTGCTTTAGTTAGTTTCCTCCTAATTCCTGAGC	10.6	9.6	10.2	8.8	9.1	8.1	1.5	0.00048	0.025
MICRO.3475.C2	MICRO.3475.C2_736	EAY78029	35.2	not assigned.unknown	NOT VALIDATED EAY78029: hypothetical protein OsI_031988 [Oryza sativa (indica cultivar-group)]	CACAGACGACGTCCGTATTTGTCTTCCTTGCAATGTGGTTTGCAACAGTGAGTCTGTTTT	9.8	9.1	9.4	8.7	8.6	8.7	0.8	0.00048	0.025
MICRO.4004.C1	MICRO.4004.C1_877	NP_192996	35.2	not assigned.unknown	NOT VALIDATED NP_192996: unknown protein [Arabidopsis thaliana]	GCATGTGGTCATCGTTGCTGAAGACGGTATACATTGTTCAAAAGCCAAGATGCTTGTCAT	13.2	12.8	13	12.4	12.2	12.5	0.7	0.00047	0.025
MICRO.4427.C2	MICRO.4427.C2_1317	CAA67728	10.8.02	cell wall.pectin*esterases.acetyl esterase	NOT VALIDATED CAA67728: pectinacetylesterase precursor [Vigna radiata var. radiata]	CTCGTCCGTTAGATACGGATAACATAGATGATTGCTGGGAAAAAAGAAAAATATGGAATT	15.3	12.2	15.1	11.2	10.4	10.9	3.4	0.00046	0.025
MICRO.4512.C1	MICRO.4512.C1_1002	AAU20370	26.22	misc.short chain dehydrogenase/reductase (SDR)	NOT VALIDATED AAU20370: (-)-isopiperitenol dehydrogenase [Mentha x piperita]	CCTTGTAATATAGCATGGATTTCGAATCTTCCTACCGTGTATTCTCTATTTGAAGGTTGA	8.9	10.3	8	11.1	10.6	11	-1.8	0.00048	0.025
MICRO.5017.C2	MICRO.5017.C2_541	ABM89110	35.1	not assigned.no ontology	NOT VALIDATED ABM89110: truncated hemoglobin [Populus tremula x Populus tremuloides]	AGAATCAAAACCAGAGTGTTGCATGTAAGAATGCTGACAATAAGCCAGCTGCAGAATAAG	10.7	10.4	11.5	10	9.4	10.1	1.1	0.00048	0.025
MICRO.5232.C1	MICRO.5232.C1_628	ABE88727	35.2	not assigned.unknown	NOT VALIDATED ABE88727: Endonuclease/exonuclease/phosphatase, related [Medicago truncatula]	TTTTCATTTCAGATTGTTAAATACACCATGGGATGAGTTTCAGTCCCCGTGCTCGCAGGC	6.5	7.6	7.1	8.1	7.8	8.6	-1.1	0.00048	0.025
MICRO.5278.C1	MICRO.5278.C1_765	ABE84633	1.01.01.02	PS.lightreaction.photosystem II.PSII polypeptide subunits	NOT VALIDATED ABE84633: hypothetical protein MtrDRAFT_AC123572g24v2 [Medicago truncatula]	GGTTCTTAGTAGGCGTTTGGCCATATGATTTCAAATCAGCCTTTGTTTATGAAATCTGGT	7.6	7.6	7.1	8.8	8.3	8.2	-1	0.00045	0.025
MICRO.5655.C1	MICRO.5655.C1_711	AAD00119	35.2	not assigned.unknown	NOT VALIDATED AAD00119: NTGP5 [Nicotiana tabacum]	AAATGATGTCGAAGCTTATTAATGCTGGGAAGGATACTTGAGAACAATAAAAACACTTGG	9.7	9	9.9	8.4	7.7	8.7	1.2	0.00046	0.025
MICRO.593.C1	MICRO.593.C1_719	NP_568647	35.2	not assigned.unknown	NOT VALIDATED NP_568647: unknown protein [Arabidopsis thaliana]	TTGCATGGACAAAAAAGTTGTATCCAAGTGAAGAAGCCGTCATGTTCTTTCTTATGAATT	9.5	9.8	9.8	10.3	10.4	10.4	-0.6	0.00045	0.025
MICRO.6133.C1	MICRO.6133.C1_408	P52903	8.1.01.01	TCA / org. transformation.TCA.pyruvate DH.E1	NOT VALIDATED P52903: Pyruvate dehydrogenase E1 component subunit alpha, mitochondrial precursor (PDHE1-A)	TGTTCACATGACACACTTATGCCAATAAGAGATTCTTGAAATGGACACCTACAGGTACCA	7.5	7.1	7.4	6.5	6.8	6.4	0.7	0.00046	0.025
MICRO.7081.C1	MICRO.7081.C1_157	NP_565311	35.2	not assigned.unknown	NOT VALIDATED NP_565311: unknown protein [Arabidopsis thaliana]	TGAATTTGGCCCTAGCGAGACGTTGAAGAGGAAGGTTGCTGAATTGAAGGTGAAGAAGAA	9.6	9.4	9.6	9	8.8	8.8	0.6	0.00049	0.025
MICRO.738.C3	MICRO.738.C3_1988	P24629	29.6	protein.folding	NOT VALIDATED P24629: Heat shock cognate 70 kDa protein 1	TGGTGGCAGCAGTGCAGGACCTAAGATTGAGGAGGTTGATTAAGCGGTTGATAAAAGATA	13.9	13.5	15.2	13.1	13.1	12.4	1.4	0.00046	0.025
MICRO.82.C1	MICRO.82.C1_477	NP_563682	27.1.1	RNA.processing.splicing	NOT VALIDATED NP_563682: unknown protein [Arabidopsis thaliana]	CGCGCAGTGATTTTCTTCATCATCTTAAAATTTAGTATGCAGGTGTTATGAATACCCATA	11.2	11.4	11.7	10.6	10.8	10.6	0.8	0.00045	0.025
MICRO.8768.C4	MICRO.8768.C4_3	NP_001055810	35.1	not assigned.no ontology	NOT VALIDATED NP_001055810: Os05g0470800 [Oryza sativa (japonica cultivar-group)]	AATTGGGCCCCTGTTTGAACCTAGAAGGCAAGTTACAGAAAAGTTCCACTGATCAGAGCT	8.9	8.2	8.8	6.8	7.5	8	1.2	0.00048	0.025
MICRO.891.C1	MICRO.891.C1_868	NP_181016	20.1	stress.biotic	NOT VALIDATED NP_181016: ACD11 (ACCELERATED CELL DEATH 11) [Arabidopsis thaliana]	AAATACCCTAGAACAGAAAAGTATCTATCTGCACTTGGGGAGAGGTTGAGCTCATTATTT	9.5	9.3	9.6	8.6	8.8	8.7	0.7	0.00046	0.025
MICRO.9464.C1	MICRO.9464.C1_722	NP_195913	29.5.11.04.03.02	protein.degradation.ubiquitin.E3.SCF.FBOX	NOT VALIDATED NP_195913: unknown protein [Arabidopsis thaliana]	TCGGTTGCATTTAACTTCCCCAAATGTACGACACTTGAATTGAGTACCACACACATCCTC	7.2	7.1	7.5	6.3	6.3	6.5	0.8	0.00045	0.025
MICRO.9581.C1	MICRO.9581.C1_655	NP_191048	35.2	not assigned.unknown	NOT VALIDATED NP_191048: unknown protein [Arabidopsis thaliana]	TAATCTTTGCCTAGTATCGTTAACAGGCGAAACGAAGGAGAGAGTCCTCTATCTGAATCA	10.7	9.9	10.7	9.7	9.1	9.5	1	0.00048	0.025
MICRO.9642.C1	MICRO.9642.C1_706	AAB36543	20.2.1	stress.abiotic.heat	NOT VALIDATED AAB36543: DnaJ-like protein [Phaseolus vulgaris]	TACTTTGTATATGCTGATTATTATAACTTAATACTAACATGAATTTCAAATCTCAGAAAA	12.2	11.4	12.3	10.3	11.2	9.7	1.6	0.00045	0.025
POCB894TV	POCB894TV_528	ABE82485	27.3.55	RNA.regulation of transcription.HDA	NOT VALIDATED ABE82485: Histone deacetylase superfamily [Medicago truncatula]	ACTTCAACAACGAGAACTGATATGAGCCACTACTATTTGGGTTACTTACAGTACAAAGTC	7.9	7.9	8.4	7.6	6.7	7.2	0.9	0.00044	0.025
PotatoF1371.scf	PotatoF1371.scf_430	NA	35.2	not assigned.unknown	NOT VALIDATED NA: NA	CCCCGAACACGAAAAAATATATTATCAATAACAGGCTCATCTCCTCTTCTATCACTATCG	12.1	12.6	11.5	13	13.3	13.4	-1.2	0.00048	0.025
SDBN004C20u.scf	SDBN004C20u.scf_559	NA	35.2	not assigned.unknown	NOT VALIDATED NA: NA	CTACAAAGATCCGAATGGCCTAGATTTGGAGCTTAGATTGGGATTGAAAAGTGATTAATA	6.7	6.8	6.6	7.4	7.5	7.7	-0.9	0.00046	0.025
TBSK03412FE04.t3m.scf	TBSK03412FE04.t3m.scf_511	O24384	20.1.07.06	stress.biotic.PR-proteins.proteinase inhibitors	NOT VALIDATED O24384: Cysteine protease inhibitor 8 precursor (PCPI-8) (Pcpi8)	TGATACGAGGTATGAAAACATGTACTACGAGTTACTGCATGTGTCCCTCGTCATCTGTGA	13.7	14.7	12.6	15	15.3	15.2	-1.5	0.00046	0.025
033B11AF.esd	033B11AF.esd_385	AAM21642	20.1.07.06	stress.biotic.PR-proteins.proteinase inhibitors	NOT VALIDATED AAM21642: putative Kunitz-type proteinase inhibitor [Solanum tuberosum]	TGGCCCATTTTCCTTGGAGGAACCAATTCTGGTTTAAAGTTTGGGGTTAAGTTTAACCCA	6.7	6.7	6.7	7	8.5	8.3	-1.3	0.00049	0.026
bf_cswbxxxx_0016d10.t3m.scf	bf_cswbxxxx_0016d10.t3m.scf_21	NA	16.4.1	secondary metabolism.N misc.alkaloid-like	NOT VALIDATED NA: NA	AAGTGGCATTAAGATTGGTGATCATTTGTACTGGTGGCTCTGTTAAGTCTCCGTACATAC	10.6	11.9	10.7	11.9	12.2	12.5	-1.1	0.00052	0.026
bf_lbchxxxx_0064g08.t3m.scf	bf_lbchxxxx_0064g08.t3m.scf_739	NP_564377	35.2	not assigned.unknown	NOT VALIDATED NP_564377: unknown protein [Arabidopsis thaliana]	TGGTTCTGGAAGATTGTGAAAGGACTTATGAAAACTTTAGCAAAGAGGAACTGAAGTTTG	9.5	9.3	9.7	8.7	8.6	8.6	0.8	0.0005	0.026
bf_mxflxxxx_0012g11.t3m.scf	bf_mxflxxxx_0012g11.t3m.scf_591	NA	35.2	not assigned.unknown	NOT VALIDATED NA: NA	ACTCGATGCTTGGTATATTGAGGTGGTTTATCACTTATTTCGTGACAGAGTGTGTTCGTA	8.2	8.4	8.1	8.9	8.9	9.3	-0.8	0.00049	0.026
bf_mxlfxxxx_0014b08.t3m.scf	bf_mxlfxxxx_0014b08.t3m.scf_669	AAB63086	27.3.99	RNA.regulation of transcription.unclassified	NOT VALIDATED AAB63086: unknown protein [Arabidopsis thaliana]	TTGTTGATGATGCTGCTCTAGATCTTACTAAGCCTAGGAGGAGAAGATTTTCCATATCTT	9.4	9.1	11.6	8	7.7	6.7	2.6	0.0005	0.026
bf_stolxxxx_0033E08.t3m.scf	bf_stolxxxx_0033E08.t3m.scf_172	NA	35.2	not assigned.unknown	NOT VALIDATED NA: NA	ACCGCTACAGTGATCGGCTCTTCAAGCAGGTGGTGGAGTGTGGTTCTTCCGATGGAAACT	15.9	16	15.6	15	15.3	14.9	0.8	0.00051	0.026
bf_suspxxxx_0001c11.t3m.scf	bf_suspxxxx_0001c11.t3m.scf_175	NA	35.2	not assigned.unknown	NOT VALIDATED NA: NA	TGGTTTACTAGAAGTCGCGATTGAATGGGAGGGAAATAAATTCCTCACTTCTCGTGTCCG	7.1	7.2	7.1	6.5	6.3	6.8	0.6	0.0005	0.026
bf_suspxxxx_0039h08.t3m.scf	bf_suspxxxx_0039h08.t3m.scf_341	NA	35.2	not assigned.unknown	NOT VALIDATED NA: NA	CATATTTACATAGCTATAGTTTTAATGACTAAATTGATTTGCGTTTGTATATTTCCATTT	9.3	6.9	9.9	6.6	6.1	6.6	2.3	0.00052	0.026
BF_TUBSXXXX_0006F02_T3M.SCF	BF_TUBSXXXX_0006F02_T3M.SCF_343	NA	35.2	not assigned.unknown	NOT VALIDATED NA: NA	GTGGACCTTTCACCACGGCTAGCTGTGCTACTTAACGTATGTTTTATTATCTCAATAATA	11.7	13.5	10.6	15.3	15	15.2	-3.2	0.0005	0.026
cSTA17L16TH	cSTA17L16TH_146	NA	35.2	not assigned.unknown	NOT VALIDATED NA: NA	GTGCTCACAGTTTCACTCTTAGAATCAGAACTCTACTCAAGTGCTCACAATTTCTCATTC	8.4	8.3	8.7	8	6.7	7.5	1.1	0.0005	0.026
cSTD6N24TH	cSTD6N24TH_521	ABE85688	29.5.11.04.03.02	protein.degradation.ubiquitin.E3.SCF.FBOX	NOT VALIDATED ABE85688: Leucine-rich repeat; Leucine-rich repeat, cysteine-containing subtype [Medicago truncatula]	TTATGAAATCTTGTCCTGTTTTGGAGTCTATTGACGTGTCTTACTGCTGGGGGTTTGGTG	6.1	5.9	6.3	6.7	7.5	6.9	-0.9	0.00052	0.026
MICRO.13932.C1	MICRO.13932.C1_530	NP_001061171	29.5.02	protein.degradation.autophagy	NOT VALIDATED NP_001061171: Os08g0191600 [Oryza sativa (japonica cultivar-group)]	CTGACATTTCCTTGATCTCGTCATGGACAGCTAACTGTAGTTGTTGGTTTGCATTCCACA	10.6	10.9	10.2	11.4	11.2	11.5	-0.8	0.00051	0.026
MICRO.16415.C1	MICRO.16415.C1_68	NA	35.2	not assigned.unknown	NOT VALIDATED NA: NA	TGTAGCAAATTTGTTTGCTTGGTTTTCTCCTCAACAAATATATAGAGAGCTTGCTTTTTA	10.6	10.5	10.7	10	9.8	9.7	0.7	0.00051	0.026
MICRO.16768.C1	MICRO.16768.C1_604	NA	35.2	not assigned.unknown	NOT VALIDATED NA: NA	CTCATGTCCTCTTAGTCATTTGAACATCATAAGATCAAATCAGTTAAGTCACGTGATCAT	6.9	6.7	7.1	7.4	7.5	7.7	-0.7	0.00051	0.026
MICRO.1704.C2	MICRO.1704.C2_574	AAP34306	35.2	not assigned.unknown	NOT VALIDATED AAP34306: copper chaperone precursor [Solanum tuberosum]	GCATTTTATACCGGTCCTAAAGAGAAGCTAAGAGTTGCCGACCTGATTGGGAGAGCTATA	10.2	9.6	10.2	9.2	9.4	8.9	0.8	0.00051	0.026
MICRO.1751.C43	MICRO.1751.C43_907	AAZ94187	20.1.07.06	stress.biotic.PR-proteins.proteinase inhibitors	NOT VALIDATED AAZ94187: Kunitz-type protease inhibitor precursor [Solanum tuberosum]	CCTACGTGAAAAATAACAAAGTCCTATGTTGAATACAAGCTTACTGGGTGTGACATGGAT	9.1	10.4	8.4	11.8	11.8	11.2	-2.3	0.00051	0.026
MICRO.1919.C2	MICRO.1919.C2_1537	NP_188637	26.06	misc.O- methyl transferases	NOT VALIDATED NP_188637: S-adenosylmethionine-dependent methyltransferase/ methyltransferase [Arabidopsis thaliana]	TCCGCGAGAATATGAGTCTTTCCTTAGCTGTAATTTATAGAGTAGATGTAGGGTTGATCT	8.5	9.5	8	9.9	9.8	9.8	-1.2	0.0005	0.026
MICRO.2214.C1	MICRO.2214.C1_724	AAU04435	30.6	signalling.MAP kinases	NOT VALIDATED AAU04435: MAPKK [Lycopersicon esculentum]	GTGAACCACAAAGGAGAGGTAAAAATTACAGATTTTGGGTGGTAAGTGCATGCTAGCCAG	7.7	7.6	7.8	7	7.2	6.8	0.7	0.00049	0.026
MICRO.2367.C1	MICRO.2367.C1_53	ABE80353	35.2	not assigned.unknown	NOT VALIDATED ABE80353: hypothetical protein MtrDRAFT_AC140022g23v2 [Medicago truncatula]	GGTTCCGTCCCTATCTGGGGGCAAGGATTATGGCATTAACTTACATCAGATCATTGAGAA	11.6	11.7	11.8	10.7	10.6	11.1	0.9	0.00051	0.026
MICRO.347.C10	MICRO.347.C10_281	NA	35.2	not assigned.unknown	NOT VALIDATED NA: NA	AATGGAGTGCTCAACAGTTGTTGATGTCCTCTGCCTCATCGCAGTTCAGTTCGATATTCA	10.3	9.2	10.4	9.2	8.6	8.8	1.1	0.0005	0.026
MICRO.423.C2	MICRO.423.C2_1	NP_193179	11.9.4.03	lipid metabolism.lipid degradation.beta-oxidation.enoyl CoA hydratase	NOT VALIDATED NP_193179: catalytic [Arabidopsis thaliana]	TCCGGATTCCCGGGATCTTTATCCTACGCAACACACATCTCAAAGCAAACAGAATCATTT	10.1	9.7	10.7	8.9	8.4	9.1	1.3	0.00051	0.026
MICRO.4672.C1	MICRO.4672.C1_1235	AAU29200	6.03	gluconeogenesis.Malate DH	NOT VALIDATED AAU29200: glyoxisomal malate dehydrogenase [Lycopersicon esculentum]	GAAATGGTTGTCTGTCAAGTACTATGCTAATAAAGAGTATCTACATTCTGTCTGTGAAAC	8.7	9	9.3	10.8	10.1	9.9	-1.2	0.00051	0.026
MICRO.7244.C1	MICRO.7244.C1_787	AAG22606	17.1.1	hormone metabolism.abscisic acid.synthesis-degradation	NOT VALIDATED AAG22606: aldehyde oxidase [Lycopersicon esculentum]	GCGCTGCTGTCAAGTGAGTGGAGATTGATATTCTGACTGGAGAGACTACCATTTTTGCAT	8.7	9.3	8.5	10.5	10.2	10.3	-1.5	0.00051	0.026
STMJC40TV	STMJC40TV_179	NA	35.2	not assigned.unknown	NOT VALIDATED NA: NA	TTTTTGGGGAATTTCAACTCCAAACTACTCCCAACTATAAGCTAGATGTTTGTGTAACTT	8.3	8.8	8.2	9.3	9	9.6	-0.9	0.0005	0.026
TBSK03635FG11.t3m.scf	TBSK03635FG11.t3m.scf_106	NA	20.1.07.06	stress.biotic.PR-proteins.proteinase inhibitors	NOT VALIDATED NA: NA	ACACTAGCGGTACAACCGCGTATAGATTCCATTCCCTTTATCTACAAACTATCTTTTGAA	7.1	7	6.9	8.4	7.4	8.4	-1.1	0.00052	0.026
055D12AF.esd	055D12AF.esd_543	NA	20.1.07.06	stress.biotic.PR-proteins.proteinase inhibitors	NOT VALIDATED NA: NA	CAAAGAAAACTGACTTGGTGATACGAGGGTATGAAAAATGTTTACAAGTTACTGCATTGT	14.4	15.3	13.2	15.8	15.9	15.7	-1.5	0.00052	0.027
ACDA00240D12.T3m.scf	ACDA00240D12.T3m.scf_127	NA	35.2	not assigned.unknown	NOT VALIDATED NA: NA	ATGGGTGAACTGGTTGGTAATGAATTGGGTGATGATGCCGAATAAGATTGAATCGGGACT	8.1	7.9	8	7.6	6.8	6.4	1	0.00053	0.027
bf_arrayxxx_0061b04.t7m.scf	bf_arrayxxx_0061b04.t7m.scf_474	AAO24558	35.2	not assigned.unknown	NOT VALIDATED AAO24558: At3g63470 [Arabidopsis thaliana]	CATCCTTCATCAATGGCACACTCCCTCCCTCGTTATAGATAAATCATCATTCTTGAAAAA	7.4	7.9	7.7	6.9	6.7	6.9	0.8	0.00054	0.027
bf_ivrootxx_0012e03.t3m.scf	bf_ivrootxx_0012e03.t3m.scf_504	NA	35.2	not assigned.unknown	NOT VALIDATED NA: NA	TTTTTTAGTGGTGCACCGATGTTATAGAAATTCTATATATCCTTATCTGCCCTTGTGGAC	6.7	6.6	6.9	7.6	7.3	7.2	-0.7	0.00055	0.027
bf_ivrootxx_0023e01.t3m.scf	bf_ivrootxx_0023e01.t3m.scf_550	NP_197710	26.1	misc.cytochrome P450	NOT VALIDATED NP_197710: CYP86B1; heme binding / iron ion binding / monooxygenase/ oxygen binding [Arabidopsis thaliana]	ATCAAGCAATCCAAACCTATCGATCTTCAAGATGTTCTCCTTAGGCTCACATTCGATAAC	6.3	6.3	6.4	7.4	8.4	6.8	-1.2	0.00054	0.027
bf_ivrootxx_0064g09.t3m.scf	bf_ivrootxx_0064g09.t3m.scf_464	NA	35.2	not assigned.unknown	NOT VALIDATED NA: NA	TTTTTGTTTCACATAGCGAAAGGGTTGGTCTTTGGGAACTCTTTCTTTAATGTATTGTTC	6.3	6.4	6.5	7.2	7	6.8	-0.6	0.00054	0.027
bf_mxflxxxx_0011f03.t3m.scf	bf_mxflxxxx_0011f03.t3m.scf_442	O65740	35.2	not assigned.unknown	NOT VALIDATED O65740: Defensin J1-2 precursor	TGTGTGGTAATATATATCGTATTATATTGTATCTATTTAAATTGAAATTAAAGTTTATTG	6.9	6.8	6.8	7.6	7.6	7.6	-0.8	0.00052	0.027
bf_mxflxxxx_0066c06.t3m.scf	bf_mxflxxxx_0066c06.t3m.scf_679	BAE98941	35.2	not assigned.unknown	NOT VALIDATED BAE98941: putative salt-inducible protein [Arabidopsis thaliana]	TACAAAAACTGTCATCAATCATCATCAACAACTCTTTTTCTGCACCGCAACAGATCATGG	7.4	7.5	7	6.6	6.5	6.8	0.7	0.00055	0.027
BF_TUBSXXXX_0045G05_T3M.SCF	BF_TUBSXXXX_0045G05_T3M.SCF_382	NA	35.2	not assigned.unknown	NOT VALIDATED NA: NA	GACGAACCTCACTCCCCAAATCTGCTCAGAAAAGCAACATTTAGGTGACCCCTTTTAATG	7.4	7.1	7.4	8.3	8.3	8.1	-0.9	0.00054	0.027
cSTA5M5TH	cSTA5M5TH_499	BAC66162	31.1	cell.organisation	NOT VALIDATED BAC66162: myosin XI [Nicotiana tabacum]	TGAAGCCAAATAATCTGCTAAAGCCCTCTATCTTCGAGAATCACAATGTTCTGCAACAGC	7.1	6.8	7.1	7.3	8.2	8	-0.8	0.00053	0.027
MICRO.11040.C1	MICRO.11040.C1_522	AAQ72790	27.3.32	RNA.regulation of transcription.WRKY domain transcription factor family	NOT VALIDATED AAQ72790: WRKY-type transcription factor [Solanum chacoense]	CGGTTTCTTTTTACATTTCAGTTCCTGAGAGTCAAACCGGGTGAATGCTGAGTTTTGACC	6.5	6	6.7	7.3	7.8	7.4	-1.1	0.00055	0.027
MICRO.11714.C1	MICRO.11714.C1_111	NA	35.2	not assigned.unknown	NOT VALIDATED NA: NA	TTAACCTAAGTATATATAATGGTGATGTATTATCTTGCATATCAACCAACAGCCTATTCG	8.1	9.5	8	10.1	10	10.2	-1.6	0.00056	0.027
MICRO.14183.C1	MICRO.14183.C1_1615	NP_188270	30.3	signalling.calcium	NOT VALIDATED NP_188270: calmodulin binding [Arabidopsis thaliana]	TGGGTGTGTGCTTGTGTAAATTCTTTTGACACCGTTTTTATGAATGAATCTTTCTTCTTG	13.5	10.6	14.3	9.7	7.9	10.1	3.5	0.00055	0.027
MICRO.15401.C1	MICRO.15401.C1_1040	ABN05708	26.22	misc.short chain dehydrogenase/reductase (SDR)	NOT VALIDATED ABN05708: Short-chain dehydrogenase/reductase SDR [Medicago truncatula]	GCTTCCAATATCATGAGGGTTTGTCTCTTTGATTTTTCTCAGTTTATGTTGCATACTTTG	6.8	6.7	6.9	8.1	7.8	7.5	-1	0.00054	0.027
MICRO.15828.C2	MICRO.15828.C2_293	NP_199852	35.2	not assigned.unknown	NOT VALIDATED NP_199852: unknown protein [Arabidopsis thaliana]	TGCCACATGAAAATTCTGAAGAGAAAGGAGAAGAAGAAGGGACCAGGATTCACCAAAAAC	8.5	8	8.5	7	7.4	8	0.9	0.00056	0.027
MICRO.15884.C1	MICRO.15884.C1_707	NP_176382	35.1	not assigned.no ontology	NOT VALIDATED NP_176382: unknown protein [Arabidopsis thaliana]	GCTAATGCATTAGGTAGGTCTCTAGGGGTTGGGATGTTTTGTTTGTCATTTTTCTTTTGT	8.7	9.9	8.8	9.8	10.5	10.3	-1.1	0.00056	0.027
MICRO.17920.C1	MICRO.17920.C1_478	CAB90945	34.11	transport.NDP-sugars at the ER	NOT VALIDATED CAB90945: putative protein [Arabidopsis thaliana]	ACCCATAAGCTATAGAAGTACTGAGTTTTGTCCTTCAAGTTTCTATGTGTTCTTCCCCAT	9.7	9.2	9.7	8.5	8.9	8.9	0.8	0.00052	0.027
MICRO.3072.C4	MICRO.3072.C4_1289	Q43843	1.03.11	PS.calvin cyle.RPE	NOT VALIDATED Q43843: Ribulose-phosphate 3-epimerase, chloroplast precursor (Pentose-5-phosphate 3-epimerase) (PPE) (RPE) (R5P3E)	ATAGCCCACCTCTCGGATGTTGTGTAATACTCTATATGTTGTATAACTTTTCTTGCATAG	11.6	11.8	11.1	12.4	12.5	12.2	-0.9	0.00056	0.027
MICRO.3654.C1	MICRO.3654.C1_349	NP_565435	29.5.09	protein.degradation.AAA type	NOT VALIDATED NP_565435: ATP binding / ATPase/ nucleoside-triphosphatase/ nucleotide binding [Arabidopsis thaliana]	CCCTGGGTGCACAGGCTGTCACCAAAATTCATGAGATATTCGATTGGGCCAAAAAATCAA	8	7.5	8.7	6.7	7.4	6.5	1.2	0.00055	0.027
MICRO.3788.C4	MICRO.3788.C4_980	P56725	26.02	misc.UDP glucosyl and glucoronyl transferases	NOT VALIDATED P56725: Zeatin O-xylosyltransferase (Zeatin O-beta-D-xylosyltransferase)	GGTCCTGTTTACATTTCTCAGTTGGTATGTACCAGAGTTATATTCAAGAACCACATATGA	7.6	9	7.7	9.6	9.4	9.7	-1.5	0.00056	0.027
MICRO.3962.C1	MICRO.3962.C1_1591	ABJ91227	29.4	protein.postranslational modification	NOT VALIDATED ABJ91227: CBL-interacting protein kinase 21 [Populus trichocarpa]	TAAGTAGATTTGTTTATCAAGGGGAAGAACCAATTTCTGGTAGCTGAAAAGTACATTTGG	10.5	11.5	9.8	12.4	12.7	12.5	-1.9	0.00055	0.027
MICRO.6188.C1	MICRO.6188.C1_1291	ABE91728	26.13	misc.acid and other phosphatases	NOT VALIDATED ABE91728: Survival protein SurE [Medicago truncatula]	CTGTATACCCTCGCAGCACTTCGCTGCACATCAGTAAAATACCTTTCACTAATCAAAAAG	10.9	9.2	10.4	8.7	9	7.5	1.7	0.00053	0.027
MICRO.7230.C1	MICRO.7230.C1_1232	EAZ45322	35.1	not assigned.no ontology	NOT VALIDATED EAZ45322: hypothetical protein OsJ_028805 [Oryza sativa (japonica cultivar-group)]	TGCCTTACCAGGCTAGCCATGGCTTTGATTCTGTAGTTCCCACCTTTGATCTATAGTACT	11.8	10.8	11	9.9	10.2	10.3	1	0.00053	0.027
MICRO.8726.C2	MICRO.8726.C2_155	AAG49032	33.99	development.unspecified	NOT VALIDATED AAG49032: ripening regulated protein DDTFR18 [Lycopersicon esculentum]	AACCTGTTTTATCCGGGGTTGCTGTTGGTTCAGGTGGCAATCAAAAGTGGCTTATATTAA	11.2	11.2	11.1	9.7	10.3	9.9	1.2	0.00056	0.027
MICRO.9381.C1	MICRO.9381.C1_992	NP_563991	35.2	not assigned.unknown	NOT VALIDATED NP_563991: unknown protein [Arabidopsis thaliana]	ATTATTATGATTGTTGAGGTCCTCTGTTTTTCTTTTGGAGGATGCATATGATAAGAGCTG	8.1	7.3	8.4	9	8.8	9	-1	0.00053	0.027
MICRO.9695.C1	MICRO.9695.C1_595	AAW56451	35.2	not assigned.unknown	NOT VALIDATED AAW56451: unknown [Flaveria brownii]	TTCCTTGCACTTATGTTTGTAAGAAACACAGGTTTGTTTGGTTCATAGAATTAAGCCTAC	9.4	10.9	8.7	11.6	11.6	11.3	-1.8	0.00054	0.027
PotatoF1489.scf	PotatoF1489.scf_4	AAB30525	20.2.1	stress.abiotic.heat	NOT VALIDATED AAB30525: small heat-shock protein homolog [Solanum tuberosum]	AAATCAAACACTAAAGAGGAAGAAGATCATCAAAGACTACACAGTATGAGGTTTGTCAGC	10.8	7.7	12.8	7.7	6.9	6.7	3.3	0.00055	0.027
STMIJ67TV	STMIJ67TV_755	NA	35.2	not assigned.unknown	NOT VALIDATED NA: NA	GATTGGTGCTGCTTTATCCCTGTCATTGTTTGTTATAAAGATCCTACTGTCTTTTTGTCT	6.2	6.3	6	6.7	7.3	7.1	-0.9	0.00053	0.027
ACDA01198D10.T3m.scf	ACDA01198D10.T3m.scf_49	NA	35.2	not assigned.unknown	NOT VALIDATED NA: NA	TCATGCTAAGGAATGCCGGGGTCCAACAATTGGGAATCAGAATTTCCAGTTGGAACCACA	8.5	8.5	8.2	7.9	7.1	7.4	0.9	0.00057	0.028
bf_arrayxxx_0021c12.t7m.scf	bf_arrayxxx_0021c12.t7m.scf_513	NP_563745	23.2	nucleotide metabolism.degradation	NOT VALIDATED NP_563745: hydrolase [Arabidopsis thaliana]	ATCCAATAGTTTCTGTGTCCCTGTGAATTAAGTGATCTGTAGAACCCAACATTGCCATCA	8.9	8.8	9.4	8.2	8.3	7.9	0.9	0.00057	0.028
bf_mxlfxxxx_0053f09.t3m.scf	bf_mxlfxxxx_0053f09.t3m.scf_219	NA	35.2	not assigned.unknown	NOT VALIDATED NA: NA	AAATGTTTGTATTGAGGGGTGCCCAGAAAATCTGGATGTGAGTTAGTATTATTATTGTGC	7.6	7.6	7.5	8	9.1	8.4	-0.9	0.00059	0.028
BF_TUBSXXXX_0031B05_T3M.SCF	BF_TUBSXXXX_0031B05_T3M.SCF_357	NA	35.2	not assigned.unknown	NOT VALIDATED NA: NA	CATGGTTCCTGACACTCATTTTTGTAATGTTTTGTTGTAGTGCTGAGGAAACTGTAAACG	7	7.4	7.2	8	8.2	7.7	-0.8	0.00058	0.028
BF_TUBSXXXX_0040F02_T3M.SCF	BF_TUBSXXXX_0040F02_T3M.SCF_548	NA	35.2	not assigned.unknown	NOT VALIDATED NA: NA	CTTTATTTCAACAAGAAGATTAACTCCACTCTACAAGTGAGATACAAACTTTCCTGCTAC	8.5	8.6	8.6	7.9	6.8	8.1	1	0.0006	0.028
BF_TUBSXXXX_0055G08_T3M.SCF	BF_TUBSXXXX_0055G08_T3M.SCF_164	NA	35.2	not assigned.unknown	NOT VALIDATED NA: NA	CAAAGGTCTCTACTACTTGATGCAAGTGCTTTTTTGTTGTTTTGACAATCATTTCAGAAG	8.5	9.7	8.5	10.9	10.5	10.2	-1.6	0.00057	0.028
BPLI17C9TH	BPLI17C9TH_661	P32980	1.01.04	PS.lightreaction.ATP synthase	NOT VALIDATED P32980: ATP synthase delta chain, chloroplast precursor	TATTGCTGCACAGCTTTGAAATTGGGGATATTTTCATTACTGGATAATTAATTGGTCTGG	8.4	9.6	8.1	10.7	10.2	9.8	-1.5	0.0006	0.028
MICRO.12599.C1	MICRO.12599.C1_1115	NP_001048734	23.3.2.3	nucleotide metabolism.salvage.nucleoside kinases.thymidine kinase	NOT VALIDATED NP_001048734: Os03g0113100 [Oryza sativa (japonica cultivar-group)]	TTTTGGGGGGAGTAGCTCCCTCAAAGTGATGAAGATGAAATGGTGTTACTCTATGATTAT	9.2	9.2	9.6	8.9	8	8	1.1	0.00058	0.028
MICRO.13874.C1	MICRO.13874.C1_783	NP_199788	30.2.8.1	signalling.receptor kinases.leucine rich repeat VIII.1	NOT VALIDATED NP_199788: ATP binding / protein kinase/ protein serine/threonine kinase/ protein-tyrosine kinase [Arabidopsis thaliana]	GACAAGTTCTAAAGACCTTGTACCAACATTGATGCAGTTGTTGGATCCTGGTATCCCCTC	6.7	7	6.7	7.2	8	7.5	-0.8	0.00058	0.028
MICRO.14311.C2	MICRO.14311.C2_942	NP_175525	35.2	not assigned.unknown	NOT VALIDATED NP_175525: unknown protein [Arabidopsis thaliana]	CTTAATCCTGAATAGAAGATCCTTTGCACCAACAGTTTGAAAATTTGTTTGCCCTATCGT	8.2	7.7	8.1	6.7	7.5	6.9	0.9	0.00056	0.028
MICRO.14425.C1	MICRO.14425.C1_392	BAA05475	35.2	not assigned.unknown	NOT VALIDATED BAA05475: tumor-related protein [Nicotiana glauca x Nicotiana langsdorffii]	TATGGGAGGACATGGATGGAAACTTAGCAAATTATGCGCGGGATCTTGAATAAGTTCATG	13.2	9.8	16	7.9	7.3	9.7	4.7	0.0006	0.028
MICRO.1520.C9	MICRO.1520.C9_825	AAZ75958	33.1	development.storage proteins	NOT VALIDATED AAZ75958: patatin precursor [Solanum tuberosum]	AGGCAGCTAAATGGGGTCCTCTACGAAGGGTTGTTAAGTAATAACAGCAAATGATTAATG	13.6	15	11.9	15.9	15.7	15.9	-2.4	0.00057	0.028
MICRO.15325.C1	MICRO.15325.C1_1188	ABE83476	35.2	not assigned.unknown	NOT VALIDATED ABE83476: Pumilio/Puf RNA-binding [Medicago truncatula]	AAAGGAAAAACTTGTAGTCAGATCTTCGTTCTTAAACTGTACAAATTGTTGCCATGTGCA	8.8	9.6	8.7	10.2	10	10	-1.1	0.00059	0.028
MICRO.16437.C1	MICRO.16437.C1_884	ABC69418	26.1	misc.cytochrome P450	NOT VALIDATED ABC69418: CYP92B3 [Nicotiana tabacum]	CCAAAGCTCTTTTTGTAGTTTTCGCATTTGCACCTCCAAGTATGTAGTCCTTCAAATAAT	7.2	7.9	7.6	8.1	9.5	9.5	-1.4	0.00059	0.028
MICRO.17073.C1	MICRO.17073.C1_1161	NP_173164	35.1	not assigned.no ontology	NOT VALIDATED NP_173164: unknown protein [Arabidopsis thaliana]	ACTGAACAATTCCAAGATGTCCATAAACGAAGATATCCAGTTACGGGGCAACCTTCGAGC	8.3	7.7	7.6	6.5	6.4	7.2	1.2	0.0006	0.028
MICRO.17237.C1	MICRO.17237.C1_300	AAF61400	26.1	misc.cytochrome P450	NOT VALIDATED AAF61400: (S)-N-methylcoclaurine 3'-hydroxylase [Papaver somniferum]	AGTGATATCGTGTGTTAGATTCAAGTATATGTTTTCCTGCTGTGTTCGTGTAGTTGTTTA	10.5	11.4	10.6	11.6	11.9	12.3	-1.1	0.00059	0.028
MICRO.2681.C1	MICRO.2681.C1_1566	AAB48444	17.3.01.02.99	hormone metabolism.brassinosteroid.synthesis-degradation.sterols.other	NOT VALIDATED AAB48444: UDP-galactose:solanidine galactosyltransferase [Solanum tuberosum]	ATGGATGGATGGATCTTAACTTTATCAAGTGCAACCATCAAAACTCGGATATGATTTTAC	6.6	6.5	6.5	8.6	9.7	8.3	-2.3	0.0006	0.028
MICRO.344.C1	MICRO.344.C1_1300	AAT90376	17.3.01.02.08	hormone metabolism.brassinosteroid.synthesis-degradation.sterols.DWF1	NOT VALIDATED AAT90376: DWARF1/DIMINUTO [Lycopersicon esculentum]	TATATCCCATTTGGCTCTGCCCACACAGAATTTACAAGCTGCCTGTGAGACCTATGATCT	8.1	7.9	7.4	12.4	11.3	9.4	-3.2	0.00056	0.028
MICRO.374.C1	MICRO.374.C1_1240	EAZ36024	35.1	not assigned.no ontology	NOT VALIDATED EAZ36024: hypothetical protein OsJ_019507 [Oryza sativa (japonica cultivar-group)]	AAGGAATGTTCTATCGACACAGTTCCCAGGAATGAAAAAACTGCGCTCATACGCTCACTG	8.2	7.4	8.4	9.2	8.9	8.9	-1	0.00057	0.028
MICRO.3801.C1	MICRO.3801.C1_371	P55748	29.5.05	protein.degradation.serine protease	NOT VALIDATED P55748: Serine carboxypeptidase II-2 precursor (CP-MII.2) [Contains: Serine carboxypeptidase II-2 chain A; Serine carboxypeptidase II-2 chain B]	AATCTACTTCAATCTTCCTGAAGTTCAGAATGCTCTTCATGTTCATAAGAGAAACTCATC	8.3	8.6	7.7	9.4	9.4	9.4	-1.2	0.00058	0.028
MICRO.3905.C1	MICRO.3905.C1_1052	AAG01117	35.2	not assigned.unknown	NOT VALIDATED AAG01117: BAC19.2 [Lycopersicon esculentum]	TCAAATGGTGTGCTAGCATTTGATGTGAAAAATGAAGTCGCTGCAGTTCTACGTGTGCCT	9.5	8.5	9.3	8.3	8	7.9	1.1	0.00059	0.028
MICRO.395.C1	MICRO.395.C1_746	EAY74975	26.05	misc.acyl transferases	NOT VALIDATED EAY74975: hypothetical protein OsI_002822 [Oryza sativa (indica cultivar-group)]	TGAGAGGGGCTCTGAAGAAATACGCAGAAAGAGTCGAAGATGGTTGGACAATGGACTATA	6.7	6.8	6.7	7.4	8.3	7.2	-0.9	0.00058	0.028
MICRO.4076.C1	MICRO.4076.C1_938	NA	35.2	not assigned.unknown	NOT VALIDATED NA: NA	CCTACTAAGTGGGATTACACTAGGTATGTTGGTATGTTGTTGCTGATGATGATTATTATT	7.4	7.6	7.5	6.9	6.8	6.9	0.6	0.00056	0.028
MICRO.4160.C1	MICRO.4160.C1_1082	NP_193590	11.9.2	lipid metabolism.lipid degradation.lipases	NOT VALIDATED NP_193590: triacylglycerol lipase [Arabidopsis thaliana]	GGTGCATTGAAAAGTGAGTATCTTGTCCCAGCAAATTGGTGGACTGTGAAGAACAAAGGA	7.1	7.9	7.1	9.3	10.3	8.5	-2	0.00058	0.028
MICRO.549.C2	MICRO.549.C2_1289	AAC72386	29.6	protein.folding	NOT VALIDATED AAC72386: chaperone GrpE type 1 [Nicotiana tabacum]	TAAGAGACGGATCGCTTCTGTCATTTGGTAAATCGGATCTCGGAGCGAAAAAAGTCAGAT	8.2	8.4	8.9	7.9	6.9	7	1.3	0.00058	0.028
MICRO.7132.C1	MICRO.7132.C1_714	CAA89834	20.2.1	stress.abiotic.heat	NOT VALIDATED CAA89834: luminal binding protein [Pseudotsuga menziesii]	GAGACCAAAGATCTTTTGTTGCTTGATGTAACTCCTTCTAAGTCTGGGAATTGAGACAGT	9.3	7.2	9.6	6.8	6.6	7.2	1.8	0.00059	0.028
MICRO.8351.C2	MICRO.8351.C2_753	NP_564693	29.5.11.04.02	protein.degradation.ubiquitin.E3.RING	NOT VALIDATED NP_564693: protein binding / ubiquitin-protein ligase/ zinc ion binding [Arabidopsis thaliana]	TGTGCTATGGTTCAGGCATTATTGATCTTGTTTAAATGCTATACGAGTCATGGTAATGAC	8.7	8.6	10.1	8.1	7.7	7.3	1.4	0.00057	0.028
MICRO.8558.C1	MICRO.8558.C1_1354	AAQ83691	11.8	lipid metabolism.'exotics' (steroids, squalene etc)	NOT VALIDATED AAQ83691: C-4 sterol methyl oxidase 1 [Nicotiana benthamiana]	AGGGTTGATTAGGCAAAAGATTGCATGTAGGGTGGATTTGTTTTGTGCTGAAAGTGTTGC	7.8	8.5	7.9	8.9	9.5	9.1	-1.1	0.0006	0.028
MICRO.9503.C1	MICRO.9503.C1_1287	BAD77944	16.8.1	secondary metabolism.flavonoids.anthocyanins	NOT VALIDATED BAD77944: UDP-glucuronic acid:anthocyanin glucuronosyltransferase [Bellis perennis]	AGAGAAGAAGAAATGGATGCAGCCGTTGAAGTGCTATTACAACAATGCAAAAACAGCAAG	9.6	9.9	14	6.9	7.1	8.2	3.8	0.00059	0.028
POADN94TV	POADN94TV_275	ABA81870	27.1.1	RNA.processing.splicing	NOT VALIDATED ABA81870: unknown [Solanum tuberosum]	CTACAGATATGGGGCAGGGGTAGACCCCTTGGGTTTTCATGTGTAATTGAGTTAGACATT	9.6	9.6	9.7	8.8	9.1	9.1	0.6	0.00056	0.028
SDBT001H12x.scf	SDBT001H12x.scf_499	NA	35.2	not assigned.unknown	NOT VALIDATED NA: NA	CTTTGCAGTAAAAAGACATTAGTATTGGCATCTTGTGAGGGGGAATACAGCTAAACATTT	9.9	8.7	9.6	8.7	8.5	7.6	1.2	0.00057	0.028
SSBT001L01x.scf	SSBT001L01x.scf_1	CAJ13713	35.2	not assigned.unknown	NOT VALIDATED CAJ13713: hypothetical protein [Capsicum chinense]	GGTATTCTGGTAACTTCAATCACTGTGTCACCCTCATTGAGAAGATCTCCGATCGTCTAA	10.2	9.6	10.2	9.4	9.1	9.1	0.8	0.00056	0.028
STMHO53TV	STMHO53TV_599	Q42429	27.3.24	RNA.regulation of transcription.MADS box transcription factor family	NOT VALIDATED Q42429: Agamous-like MADS-box protein AGL8 homolog (POTM1-1)	CTCTCTCTCTCTCTATATTGATGCCACAATATATTGTCTAAACGTACCTTCGAAGACATG	14.1	12.9	15.2	12.3	12.6	12.6	1.5	0.00058	0.028
TBSK02923FD07.t3m.scf	TBSK02923FD07.t3m.scf_75	NA	29.5.04	protein.degradation.aspartate protease	NOT VALIDATED NA: NA	ATGGCACACTAAGTCTCTTTCTTGGACTACTTCAGGTGCTTCTTACTAAATACTTGTGCA	12.7	13.3	12.9	14.3	14.1	13.8	-1.1	0.00057	0.028
bf_arrayxxx_0052e08.t3m.scf	bf_arrayxxx_0052e08.t3m.scf_329	O24383	20.1.07.06	stress.biotic.PR-proteins.proteinase inhibitors	NOT VALIDATED O24383: Cysteine protease inhibitor 10 precursor (PCPI-10) (Pcpi10)	TTCATCGCGTCGAATGCTGCTTAGCTGGCTAGCTTGCAGCTTCTTACATAATGTGGATAT	12.1	13.1	11	13.4	13.8	13.9	-1.6	0.00063	0.029
BF_CSCHXXXX_0031C10.T3M.SCF	BF_CSCHXXXX_0031C10.T3M.SCF_458	NA	35.2	not assigned.unknown	NOT VALIDATED NA: NA	TAGATGAAGTCGAAACGCAACCAGCTGATGAGCCAGAAGAGATGCATCAACTCCGAAAAA	8.5	8.8	9.5	8.1	7.8	7.9	1	0.00064	0.029
bf_cswbxxxx_0012h01.t3m.scf	bf_cswbxxxx_0012h01.t3m.scf_210	NA	35.2	not assigned.unknown	NOT VALIDATED NA: NA	GGCCTTAGCGGTTGCACTGTGATACTCAAGGTGGTTGCTGATGTTTATTAGTCAGTCTAA	9.1	9.5	9.1	10.1	10	10	-0.8	0.0006	0.029
bf_cswbxxxx_0058a03.t3m.scf	bf_cswbxxxx_0058a03.t3m.scf_24	NA	35.2	not assigned.unknown	NOT VALIDATED NA: NA	GCCCAATGGTGTTCGAGTGCGGAGTAATGTTGTATGTTTTTTATTCAAGAAGTTTCGTTC	9.1	9.2	9	9.8	10	9.8	-0.7	0.00062	0.029
bf_mxflxxxx_0073d07.t3m.scf	bf_mxflxxxx_0073d07.t3m.scf_297	AAQ10004	35.2	not assigned.unknown	NOT VALIDATED AAQ10004: S2 self-incompatibility locus-linked G221 protein [Petunia integrifolia subsp. inflata]	CAACAAGTCGCTGCTCAATACAACAATGTAATTCCATTAGTGGAGTCTGAGGACATTAAA	9.4	9.6	9.8	8.8	9.1	8.9	0.7	0.00064	0.029
bf_stolxxxx_0034d03.t3m.scf	bf_stolxxxx_0034d03.t3m.scf_289	NA	35.2	not assigned.unknown	NOT VALIDATED NA: NA	GCTGTACTGTATTCCAAAAAAGGTTGTTCATCTGATGATGACAGTGACGATGATAATTCT	8.3	8.3	7.6	7.3	6.9	6.6	1.1	0.00063	0.029
bf_stolxxxx_0070b02.t3ma.scf	bf_stolxxxx_0070b02.t3ma.scf_361	NA	35.2	not assigned.unknown	NOT VALIDATED NA: NA	TGAGTAATATGTGCTATGTAGTATGTAGCATGGTGGGTGGACCTTTACCACGGCTAGTGT	10.7	12.8	9.6	14.4	14.2	14.6	-3.4	0.00063	0.029
bf_suspxxxx_0007D04.t3m.scf	bf_suspxxxx_0007D04.t3m.scf_687	BAA83711	20.2.1	stress.abiotic.heat	NOT VALIDATED BAA83711: heat shock factor [Nicotiana tabacum]	AGTTGCTGCTCTACGCGTTCAGTAGCTCAGACGTTCTTGATTGTTAAAATGTTTGTTCAC	8.7	8	8.8	8	7	7	1.2	0.00062	0.029
bf_suspxxxx_0027C02.t3m.scf	bf_suspxxxx_0027C02.t3m.scf_355	CAJ34814	10.4	cell wall.pectin synthesis	NOT VALIDATED CAJ34814: glycosyltransferase [Plantago major]	AAGCATCCCTCAATATGACTTGTTCCGTAGGTGGTATCTTGTCTATCCAAGTCTTATTTA	10.8	11.3	10.6	11.7	12	11.6	-0.9	0.00061	0.029
cSTA14J1TH	cSTA14J1TH_338	BAD18096	31.1	cell.organisation	NOT VALIDATED BAD18096: kinesin heavy chain-like protein [Ipomoea batatas]	AGATGAGGATATCCCAAGTGTTGACAATTTTGTGGCAGGTCTTAAGGAGATGGCTAAGCA	8	6.9	7.4	8.2	8.8	9	-1.2	0.00063	0.029
cSTB20D11TH	cSTB20D11TH_215	NP_566005	27.3.99	RNA.regulation of transcription.unclassified	NOT VALIDATED NP_566005: unknown protein [Arabidopsis thaliana]	GATGTAGGGGTGTTCATGGTTTGGATAAAAACCGATCCAAATCGAAAAATCAAACCAAAC	8.1	7.2	7.7	6.9	6.8	6.8	0.9	0.00063	0.029
cSTB44H15TH	cSTB44H15TH_297	NA	35.2	not assigned.unknown	NOT VALIDATED NA: NA	ATTTCGTTGGTGTTATTTCTTTGTTTTACTGTAATACTCAAGAAACATGGTCAGTCAGGG	6.3	6.8	6.8	7.1	8.2	7.3	-0.9	0.00065	0.029
MICRO.1076.C1	MICRO.1076.C1_1353	AAO19451	2.1.2.05	major CHO metabolism.synthesis.starch.transporter	NOT VALIDATED AAO19451: glucose-6-phosphate/phosphate translocator 2 [Solanum tuberosum]	ACTGGAGATGGATGTGGAAAATGGGCAGTCTCGGTGAATGAAGGTGCCTTTTGAGTAATT	10.1	13	9.8	14.5	14.8	13.8	-3.4	0.00063	0.029
MICRO.1149.C1	MICRO.1149.C1_392	NA	35.2	not assigned.unknown	NOT VALIDATED NA: NA	TTTGGACTCAGGCAACAATCTTCTTGGTTGGATCCTTTTTGATGCTATTTGGTTTGATTT	11.2	11	10.9	12.4	11.9	13	-1.4	0.00063	0.029
MICRO.13953.C1	MICRO.13953.C1_419	NP_177824	35.2	not assigned.unknown	NOT VALIDATED NP_177824: unknown protein [Arabidopsis thaliana]	AGAAGAATCCATCAGCAAATACAACTAGAGTTTCTCCTAAACCTGAAGAATGTGAAAATG	11.7	12.1	10.6	12.7	13	12.5	-1.2	0.00061	0.029
MICRO.14060.C2	MICRO.14060.C2_851	AAM62483	35.1.1	not assigned.no ontology.ABC1 family protein	NOT VALIDATED AAM62483: putative ABC1 protein [Arabidopsis thaliana]	CGCCCTTTACCTTCTGGCCGTAGAAGCATTTTTGGAAGGAGAAAACCTCAGTTGATACTT	8.8	8.4	8.6	7.7	8.1	6.9	1	0.00063	0.029
MICRO.17034.C1	MICRO.17034.C1_374	NA	35.2	not assigned.unknown	NOT VALIDATED NA: NA	GCACCTTGATGAAATTCATCCCAAAGAAAGATAATCAAACAAGGCTCTTACTTCATTAAG	7.2	7.4	7.1	6.6	6.8	6.4	0.6	0.00061	0.029
MICRO.1802.C1	MICRO.1802.C1_1554	NP_174697	27.3.11	RNA.regulation of transcription.C2H2 zinc finger family	NOT VALIDATED NP_174697: nucleic acid binding / transcription factor/ zinc ion binding [Arabidopsis thaliana]	TCTGCTATCTGGATCATGTGAATACCCTCCTCACAAGGCTGCCAAATTTATGAGTTCTAG	11.7	11.5	11.8	11	10.9	11.3	0.6	0.00062	0.029
MICRO.18068.C1	MICRO.18068.C1_581	NP_193058	35.2	not assigned.unknown	NOT VALIDATED NP_193058: unknown protein [Arabidopsis thaliana]	ATCAACGTCTCTGGCTTCTTTAAAAATAGGTAGTAGGCCTTCAAATCATTTCATAAAAGG	10.4	10.6	10.2	11.2	11.1	11.5	-0.9	0.00064	0.029
MICRO.1834.C1	MICRO.1834.C1_1863	Q06801	2.2.2.04	major CHO metabolism.degradation.starch.D enzyme	NOT VALIDATED Q06801: 4-alpha-glucanotransferase, chloroplast precursor (Amylomaltase) (Disproportionating enzyme) (D-enzyme)	AGCTAAGAGATATACTTGCAACTTATGGGCGGTTGTGATGATGAATGATGATTAAGATGT	12	13.1	11.4	13.5	13.8	13.5	-1.4	0.00062	0.029
MICRO.2063.C3	MICRO.2063.C3_1416	ABN81349	17.2.2	hormone metabolism.auxin.signal transduction	NOT VALIDATED ABN81349: auxin influx transport protein [Casuarina glauca]	CATTCGGAGATCAACTTCTTAACCATAGTAACGCATTTTCACTTCTTCCAAAAGACAGAT	7.5	8	7.3	6.7	6.8	6.7	0.8	0.00064	0.029
MICRO.2988.C4	MICRO.2988.C4_1030	AAM91028	30.3	signalling.calcium	NOT VALIDATED AAM91028: calcineurin B [Pisum sativum]	TGTGGCTGTGTATTCTTGTTACCTCTGAAAAAATGCTAAGTTTCCTTGTTGATGCTGCTC	11.7	12	11.3	12.3	12.8	12.5	-0.9	0.00063	0.029
MICRO.3132.C1	MICRO.3132.C1_721	NA	35.2	not assigned.unknown	NOT VALIDATED NA: NA	TTAACTGCGAACTCGATTAGTTGAACATGGGATTGTTATTAAAGTTTCGCTTAGTTTTGG	8.3	8.4	8.4	9.2	8.8	9.4	-0.8	0.00062	0.029
MICRO.3480.C1	MICRO.3480.C1_708	NA	35.2	not assigned.unknown	NOT VALIDATED NA: NA	TAGGATCTGGCAATTCTGATCAGGCTTCTCTGAGCAGAAAGCTGCACTAGATGAAATACC	7.8	8	7.3	7	6.7	6.8	0.8	0.00061	0.029
MICRO.3621.C3	MICRO.3621.C3_1	ABI34375	29.5.11.01	protein.degradation.ubiquitin.ubiquitin	NOT VALIDATED ABI34375: hypothetical protein SDM1_53t00013 [Solanum demissum]	CCCAAATATCCCTTTATAAGCTTTCTTTCTATAATAGATGGTTTGGGGTTTGAGCCTTTT	7.7	7.5	7.7	6.6	6.8	7.3	0.7	0.00061	0.029
MICRO.4233.C2	MICRO.4233.C2_528	AAK29646	26.22	misc.short chain dehydrogenase/reductase (SDR)	NOT VALIDATED AAK29646: putative short-chain type alcohol dehydrogenase [Solanum tuberosum]	TAAGGCTGCTATGGATTCTATGACGTTCGTCGTATCAAACACCTATCGTACTAACTTTGT	9.4	10.2	9	11.1	11.7	11.6	-1.9	0.00061	0.029
MICRO.5968.C1	MICRO.5968.C1_741	NA	35.2	not assigned.unknown	NOT VALIDATED NA: NA	AAGAGATGGGATTGTCAGCAGAAGAACACTAAAGTGGGAAGCTACATGCGCTATGGAAGA	8.3	8.3	7.6	9.1	9.3	8.7	-0.9	0.00063	0.029
MICRO.6075.C1	MICRO.6075.C1_1156	AAV65495	3.2.3	minor CHO metabolism.trehalose.potential TPS/TPP	NOT VALIDATED AAV65495: trehalose 6-phosphate synthase [Gossypium hirsutum]	TTCAGTTTTGCCGTAGTCATGATGGCTGCCCTGAATGATTAACAAACACCATTGCGTTGT	12.7	11.6	14.3	11.5	10.5	10.8	1.9	0.00064	0.029
MICRO.6798.C1	MICRO.6798.C1_708	ABE78679	29.5.11.04.03.02	protein.degradation.ubiquitin.E3.SCF.FBOX	NOT VALIDATED ABE78679: Cyclin-like F-box [Medicago truncatula]	CAATCAAGGGGTCTATGCGACGGGTAATCTTTTATAGTGCCTCGTACAAATAAATGGCAC	8	7.4	7.4	6.8	6.4	6.8	0.9	0.00062	0.029
MICRO.712.C41	MICRO.712.C41_269	CAB87792	35.2	not assigned.unknown	NOT VALIDATED CAB87792: putative protein [Arabidopsis thaliana]	CTCTGCATACAAGGCTTGTGAGTCTCAAGTCACTCAACAATGTGAATCTGGAGCTAGGAT	8.7	8.8	8.7	8.1	7.4	8.3	0.8	0.00061	0.029
MICRO.7527.C3	MICRO.7527.C3_993	NP_177865	35.1.5	not assigned.no ontology.pentatricopeptide (PPR) repeat-containing protein	NOT VALIDATED NP_177865: unknown protein [Arabidopsis thaliana]	TATGGTATGGAAACTGGCTGTAGAAAAGCTATTAGACGGAGAATATGGGAGGCGAATCAC	7.5	8	7.4	7	6.4	6.8	0.9	0.00065	0.029
MICRO.7551.C1	MICRO.7551.C1_797	NP_182309	21.04	redox.glutaredoxins	NOT VALIDATED NP_182309: arsenate reductase (glutaredoxin)/ electron transporter/ thiol-disulfide exchange intermediate [Arabidopsis thaliana]	TAAAAGTTAGTGGCTCGATCGACTAATGACACTAGTCATGTAGATCAAGGTCATGGTATA	10.2	11.6	9.7	12.1	11.8	12.1	-1.5	0.00063	0.029
POCAH09TV	POCAH09TV_165	ABD32636	35.2	not assigned.unknown	NOT VALIDATED ABD32636: hypothetical protein MtrDRAFT_AC150207g26v2 [Medicago truncatula]	ATACGGGGGATAAACCAATTGAAGTAGATTTTCATGGAACTTCAATACTTTTTGAAACGG	9.6	8.8	9.5	8.9	7.8	7.3	1.3	0.00065	0.029
STMEW67TV	STMEW67TV_812	NP_820157	35.2	not assigned.unknown	NOT VALIDATED NP_820157: TPR domain protein [Coxiella burnetii RSA 493]	ATACACGCCTCACTTTTAGGGGCATCTACTACTTAAAAGAGCCTAGATTATTCTGTTAAA	6.5	6.6	6.5	7.6	8.1	6.8	-0.9	0.00061	0.029
STMJO82TV	STMJO82TV_448	AAT40107	10.1.05	cell wall.precursor synthesis.UXS	NOT VALIDATED AAT40107: UDP-glucuronate decarboxylase 1 [Nicotiana tabacum]	CTCAAAGTTTTCTTTTGTTGCTTTGTCTTTCTGAATGGAGAATAAACTATGTCCAGCATC	10.4	11.4	10.3	11.9	11.9	11.6	-1.1	0.00064	0.029
008E11AF.esd	008E11AF.esd_665	ABE77821	35.2	not assigned.unknown	NOT VALIDATED ABE77821: Integrase, catalytic region; Zinc finger, CCHC-type; Peptidase aspartic, catalytic [Medicago truncatula]	TTCAACAATGCTGAATGGCTAAGAAAGAGGAGGCTTAGATCACAAACCCTATTAGGTCAT	6.4	6.3	6.3	7	7.3	6.8	-0.7	0.00066	0.03
ACDA01157A05.T3m.scf	ACDA01157A05.T3m.scf_490	NA	35.2	not assigned.unknown	NOT VALIDATED NA: NA	AAACCACCTTTAAGCCGCATTTGAGATTTCCACCATTCTCCAAACCCACTAAATGATTAT	9.4	8.6	8.6	8.1	6.8	7.8	1.3	0.00067	0.03
bf_arrayxxx_0068h04.t3m.scf	bf_arrayxxx_0068h04.t3m.scf_378	NA	35.2	not assigned.unknown	NOT VALIDATED NA: NA	TCAGAGCTCTACTATAACACAATTTTTCACAAAGATAAATGGAGAAGATGATTCTGGCAG	7.6	7.4	7.4	7	6.7	6.8	0.6	0.00068	0.03
BF_LBCHXXXX_0027G04_T3M.SCF	BF_LBCHXXXX_0027G04_T3M.SCF_269	NA	35.2	not assigned.unknown	NOT VALIDATED NA: NA	AGTGTAGAACCATCTCAATTTTGCAGTAACGAGTCCAATTATAAGAGGGTACAACAAAAA	7.8	6.9	7.4	6.4	6.7	6.2	0.9	0.00067	0.03
bf_mxflxxxx_0013h11.t3m.scf	bf_mxflxxxx_0013h11.t3m.scf_279	NA	35.2	not assigned.unknown	NOT VALIDATED NA: NA	AGTACCTTTGGTAGTGGGAACAACTTGGTGGAGATACCAGAGAAGTTGTACTTAAACTAT	6.8	6.3	6.8	7.1	7.7	7.3	-0.8	0.00067	0.03
bf_mxflxxxx_0039g01.t3m.scf	bf_mxflxxxx_0039g01.t3m.scf_639	NA	35.2	not assigned.unknown	NOT VALIDATED NA: NA	CGGTTTCTGTATTTAACGGAGAGTACGGTGACCTTATCATTTTTGATAATAATTGTCTTG	6.6	6.5	6.5	7	7.3	7.2	-0.6	0.00066	0.03
bf_swstxxxx_0033g09.t3m.scf	bf_swstxxxx_0033g09.t3m.scf_535	NA	35.2	not assigned.unknown	NOT VALIDATED NA: NA	AATTATAAATGGATTGGTTGTTATGCAGTTGCCTGTTTGACCAAATTTTGAAAGGCGAAG	7.1	7.1	7.9	6.7	6.3	6.5	0.9	0.00066	0.03
bf_swstxxxx_0062f05.t3m.scf	bf_swstxxxx_0062f05.t3m.scf_657	NP_178476	35.1	not assigned.no ontology	NOT VALIDATED NP_178476: unknown protein [Arabidopsis thaliana]	ATTAAGCACGATGCTGCTAATCGTGCTATAAAGATTCAACAGTTGGATCAGGGAATTGAT	9.6	7.4	8.8	6.9	6.5	7.5	1.6	0.00065	0.03
BF_TUBSXXXX_0049F10_T3M.SCF	BF_TUBSXXXX_0049F10_T3M.SCF_209	NA	35.2	not assigned.unknown	NOT VALIDATED NA: NA	AAGAAAAGGAAATCAACTTTCTGATCATTTTCAACATGTCTGCTCGTCGGCATCAGTAGT	7.8	7.7	8.1	7.6	7	6.7	0.8	0.00067	0.03
cSTB33H20TH	cSTB33H20TH_1	NA	35.2	not assigned.unknown	NOT VALIDATED NA: NA	TTCATCACGGGGTTTTGCACTAAAATGGCTTCTTTCATTATCTCTCTTACCTTTGTACTC	6.4	6.4	6.4	7.4	6.8	7.5	-0.8	0.00067	0.03
MICRO.10372.C2	MICRO.10372.C2_326	NP_569027	31.1	cell.organisation	NOT VALIDATED NP_569027: EMB2036; protein binding [Arabidopsis thaliana]	AAGTGCCAGCTTTGTTGAGTTTGGCTCTTTTGTGTCGCACCCCGAGAGTTATTTGTACAA	8.2	8	8.1	8.8	9	8.5	-0.7	0.00069	0.03
MICRO.10838.C1	MICRO.10838.C1_791	AAV92903	30.2.17	signalling.receptor kinases.DUF 26	NOT VALIDATED AAV92903: Avr9/Cf-9 rapidly elicited protein 236 [Nicotiana tabacum]	GAAGTGTATGTAGTTTCTCTCAGGAAATAAAACTACGTGGCATAATACATAAATGCGTCC	7.5	7.6	7.8	7.2	6.8	6.7	0.8	0.00067	0.03
MICRO.14596.C1	MICRO.14596.C1_557	NP_200224	28.1	DNA.synthesis/chromatin structure	NOT VALIDATED NP_200224: calcium ion binding [Arabidopsis thaliana]	AAGTGTCTATTCATGTCGATCAAGACTTACTCTAGGCGTTCAAGTATAATGCCATAATGG	11.5	11	11.9	10.6	9.9	10.3	1.2	0.00067	0.03
MICRO.1520.C24	MICRO.1520.C24_41	ABC55686	35.2	not assigned.unknown	NOT VALIDATED ABC55686: patatin protein group M-2 [Solanum tuberosum]	CAATTACCTCAGGGTTCAAGTAAGTCCCAACTTACATAAATCTCACTAGCTAGTTTGCAA	8.9	9.8	8.5	10	11.7	12.1	-2.2	0.00067	0.03
MICRO.17563.C1	MICRO.17563.C1_326	NA	35.2	not assigned.unknown	NOT VALIDATED NA: NA	TTGGTCCAACTGTAATTCAACATGAAGAGTTGAAAGTTTGTACTTCTCAATAGAAGCTTC	7.4	6.9	6.9	8.4	7.8	8.6	-1.2	0.00065	0.03
MICRO.3666.C2	MICRO.3666.C2_739	EAY96612	29.8	protein assembly and cofactor ligation	NOT VALIDATED EAY96612: hypothetical protein OsI_017845 [Oryza sativa (indica cultivar-group)]	TAAACTCCACAGAAGACAGGACAGCTGATTGCAGCATGTTCCTTAATGAGTCTATAAAAA	11.8	10.8	11.9	10.6	10.4	10.7	1	0.00067	0.03
MICRO.4620.C1	MICRO.4620.C1_533	Q9ZR41	21.04	redox.glutaredoxins	NOT VALIDATED Q9ZR41: Glutaredoxin	TAGCCTATGCTTTGTTATGTGTAATATGTCTTGCAAATGGGTCATAGTACGCCCTTGAAT	10.4	11	10.8	12	12.3	11.2	-1.1	0.00066	0.03
MICRO.5355.C1	MICRO.5355.C1_599	NA	35.2	not assigned.unknown	NOT VALIDATED NA: NA	TTATGCATGCAGGTACTTTAAAGATTCAAACTTTTTGCCTACGAGGAAAGTTGACATTAC	7.6	7.1	7.2	6.9	6.4	6.4	0.7	0.00066	0.03
MICRO.5577.C1	MICRO.5577.C1_3128	ABI48276	29.4	protein.postranslational modification	NOT VALIDATED ABI48276: phototropin-2 [Lycopersicon esculentum]	TAAGTTTGGATCCAAGGAAGGCAATTTACGTACATAGAATTTGTAGAATGGCGTGAGTAA	8.5	9.6	8.3	10.1	10.5	9.9	-1.3	0.00067	0.03
MICRO.640.C1	MICRO.640.C1_1412	NP_851141	27.4	RNA.RNA binding	NOT VALIDATED NP_851141: RNA binding / nucleic acid binding [Arabidopsis thaliana]	TATAGAATTGTGGGTTCCTGGACACATAGGTATATAACATTGTACTTTTGTGCCATTATG	12.5	13.2	12.1	13.7	13.8	13.2	-1	0.00066	0.03
MICRO.7986.C2	MICRO.7986.C2_694	NP_849691	26.16	misc.myrosinases-lectin-jacalin	NOT VALIDATED NP_849691: unknown protein [Arabidopsis thaliana]	GTTCCTGATCACGAAATCCTAGCTCAATCGAACCCAAATAAAAAGGGCAGTCTACTTGTC	7	7.6	6.9	6.2	6.3	6.7	0.8	0.00067	0.03
MICRO.8261.C1	MICRO.8261.C1_687	NP_176964	20.2.1	stress.abiotic.heat	NOT VALIDATED NP_176964: AT-HSFA8; DNA binding / transcription factor [Arabidopsis thaliana]	TTTCCTTCATTGTTATGGCTATGCAAAGCCCAAGTTTTTTGGTTCAGTTTTTCCAGCCCA	9.8	9.2	9.7	8.7	8.8	8.5	0.9	0.00066	0.03
MICRO.8748.C1	MICRO.8748.C1_717	AAL87457	30.3	signalling.calcium	NOT VALIDATED AAL87457: serine/threonine protein kinase pk23 [Lycopersicon esculentum]	GAAACCAACAACTGATGCCATGAGGGAGGCAGAAGTCTTGACATCATAAATTTGCTGGAA	8.1	8.3	8.3	7.9	7.3	6.9	0.9	0.00066	0.03
POAB217TV	POAB217TV_604	ABE80978	35.2	not assigned.unknown	NOT VALIDATED ABE80978: Double-stranded RNA binding [Medicago truncatula]	GGGGCTGGAACAAACAAAGGGAAATGAAATGCTTGGGAAGTTCAGAGAATGATAGTAACT	7.6	8.3	7.7	7.3	6.9	6.4	1	0.00068	0.03
POADH91TP	POADH91TP_888	AAR13304	10.2	cell wall.cellulose synthesis	NOT VALIDATED AAR13304: phytochelatin synthetase-like protein [Phaseolus vulgaris]	GAGTTGTGTAGATCCAGAAATGCCACACCTAGCTTCAGTTGTATCAGACCATGGGAAGAA	9.9	8.1	9.3	7.8	8.2	6.8	1.5	0.00065	0.03
POCAI93TP	POCAI93TP_421	AAN77052	27.3.03	RNA.regulation of transcription.AP2/EREBP, APETALA2/Ethylene-responsive element binding protein family	NOT VALIDATED AAN77052: dehydration responsive element binding protein [Lycopersicon esculentum]	AAACCCAAATCCGAAGAAGATCAGTAAAAACAACAATGGTGGTAGTACTGATGTTTCGTA	7.2	7.5	7.4	6.8	6.4	6.9	0.7	0.00066	0.03
PotatoF1496.scf	PotatoF1496.scf_169	NA	35.2	not assigned.unknown	NOT VALIDATED NA: NA	TATGGAGGCTATTATTGTAGGGAGTACCATCCATTACCGTTGTCTCTACGACGATATTTA	12.1	12.1	12.1	11.5	10.7	10.8	1.1	0.00066	0.03
RA1nr054.scf	RA1nr054.scf_83	NA	20.1.07.06	stress.biotic.PR-proteins.proteinase inhibitors	NOT VALIDATED NA: NA	GTAGAATGCTAATTAGCTGGCTACCCCCCACCTTTTTAAATAAAGTGGGGGATATATCCT	9.2	9.6	8.4	9.9	10.7	10.3	-1.3	0.00067	0.03
TBSK04415Fh11.t3m.scf	TBSK04415Fh11.t3m.scf_292	NA	35.2	not assigned.unknown	NOT VALIDATED NA: NA	GAGAAGAGTTTCCTTCATTTTGTGTTTATATGTCTATGGGTTTGTGCTTTAATGCCACCA	9.2	9.9	9.7	10.2	10.4	10.7	-0.8	0.00066	0.03
137F10AF.esd	137F10AF.esd_631	NA	35.2	not assigned.unknown	NOT VALIDATED NA: NA	TTTGCAGAAGTATAGACTTGGACAGCTGGCCAAGAAACAAAATGCAGCAGAGGCAAACAA	8	8.4	7.9	9	9.4	9.6	-1.3	0.0007	0.031
ACDA02123A11.T3m.scf	ACDA02123A11.T3m.scf_370	CAA77867	28.1.3	DNA.synthesis/chromatin structure.histone	NOT VALIDATED CAA77867: H1 histone-like protein [Solanum lycopersicum]	ACTATCTAGAGGCTGGCAAAGAAGGAGGACTACAACAAAAACATCTAGCCAATATGCTCC	13.3	11.2	12.8	10.7	10.8	11	1.6	0.00069	0.031
bf_cswcxxxx_0005c09.t3m.scf	bf_cswcxxxx_0005c09.t3m.scf_66	NA	35.2	not assigned.unknown	NOT VALIDATED NA: NA	TTTTAAATAAAGTGGGGGAAATATCCTTTTATCGGCTCCATGTAATTTAATGTATGCTTA	14.6	15.4	14.1	15.7	15.9	15.9	-1.1	0.00074	0.031
BF_LBCHXXXX_0045F12_T3M.SCF	BF_LBCHXXXX_0045F12_T3M.SCF_485	AAY42864	21.01	redox.thioredoxin	NOT VALIDATED AAY42864: thioredoxin H [Nicotiana alata]	CTCGACGATAGGTGTCTCTGTAGAATAAATGTCATATCTGTGTCGCTAAGAACTTGTTAC	10.4	11.2	9.5	12	11.7	11.7	-1.4	0.0007	0.031
bf_mxflxxxx_0009e02.t3m.scf	bf_mxflxxxx_0009e02.t3m.scf_459	BAD22677	35.1	not assigned.no ontology	NOT VALIDATED BAD22677: flowering locus T like protein [Populus nigra]	GTTGCAACTGTTTATTTCAATGCTCACAAGGAACCAGCAAATCGAAAGCGCTAAGTGAGC	10.1	8.7	10.3	8.2	7.8	7.2	2	0.00074	0.031
bf_mxflxxxx_0020f01.t3m.scf	bf_mxflxxxx_0020f01.t3m.scf_256	NA	35.2	not assigned.unknown	NOT VALIDATED NA: NA	CAATATGGGATTTCCCGGCACGATTTTGGATTTAAAAGTAGTTCACTTTGCTTTTCTAAA	9.7	10.6	10.1	11	11.1	11.3	-1	0.00072	0.031
bf_mxlfxxxx_0026c03.t3m.scf	bf_mxlfxxxx_0026c03.t3m.scf_236	NP_001062565	3.5	minor CHO metabolism.others	NOT VALIDATED NP_001062565: Os09g0108600 [Oryza sativa (japonica cultivar-group)]	TTGCAACCAATAAAGGTACCTTCTTCAAGATGAAAAACCTTAAGTAGTATGAGTTGTGAG	10.3	10.5	10.3	11.2	10.9	10.9	-0.6	0.00074	0.031
bf_mxlfxxxx_0066c08.t3m.scf	bf_mxlfxxxx_0066c08.t3m.scf_279	NA	1.01.02.01	PS.lightreaction.photosystem I.LHC-I	NOT VALIDATED NA: NA	AAGCATTGGGTTACTGGTGTTGGACCTTACCAAGAACCTTCTTGATCATTTGGCTGATCC	11.6	11.5	10.6	13.4	12	13.1	-1.6	0.00071	0.031
bf_mxlfxxxx_0074e07.t3m.scf	bf_mxlfxxxx_0074e07.t3m.scf_564	NP_195371	35.1	not assigned.no ontology	NOT VALIDATED NP_195371: catalytic/ hydrolase [Arabidopsis thaliana]	GTTGATTCGACCTGATACTGAAGTCAGCTTGATCCAAAGAGTTCCACCACATCTTCTCTA	8.6	8.9	9.3	8.6	7.2	7.4	1.2	0.00072	0.031
bf_stolxxxx_0070f06.t3ma.scf	bf_stolxxxx_0070f06.t3ma.scf_365	NA	35.2	not assigned.unknown	NOT VALIDATED NA: NA	ATTTAGTGAAAATGTTGACTCTCTTAGTAATAATGTTGGCTCTGCCAAAGTTCGGATGAA	9.2	10.9	8.8	11.2	12	11.5	-1.9	0.00071	0.031
bf_suspxxxx_0055c04.t3m.scf	bf_suspxxxx_0055c04.t3m.scf_379	AAD01264	29.5.05	protein.degradation.serine protease	NOT VALIDATED AAD01264: glucose acyltransferase [Solanum berthaultii]	CGACTCATACGTCTATGATATCCAAACTTCAATTGATGATCATCGTCATCTCACTAGCAA	8.2	8.9	8	10.1	10.1	9.8	-1.7	0.00074	0.031
cSTD18J2TH	cSTD18J2TH_182	EAZ35740	35.2	not assigned.unknown	NOT VALIDATED EAZ35740: hypothetical protein OsJ_019223 [Oryza sativa (japonica cultivar-group)]	TGGTGGTCAGGCTCAGGAAAATTCTGAACCAACAAAAGACTTGGTTGTTAAGAACAAGAA	12.1	9.8	12	9.6	9	9.3	2	0.00069	0.031
cSTE5G17TH	cSTE5G17TH_85	AAK68728	35.1	not assigned.no ontology	NOT VALIDATED AAK68728: Unknown protein [Arabidopsis thaliana]	CATATGTTTACCCTGTACTTCCATATGATTTCCTTGAAGTGGGGTGGCATGTCATCCCTG	7.9	7.4	7.8	6.9	7.1	7.1	0.7	0.00071	0.031
MICRO.10342.C1	MICRO.10342.C1_316	NA	35.2	not assigned.unknown	NOT VALIDATED NA: NA	TTTTTTGGTTAGCTTTTTGGTCCCTTGGACCATTTTATTAAAGCGCAGGTCCAAGAGCTG	6.7	6.4	6.2	7.1	6.9	7.5	-0.8	0.00071	0.031
MICRO.1036.C9	MICRO.1036.C9_494	Q41229	1.01.02.02	PS.lightreaction.photosystem I.PSI polypeptide subunits	NOT VALIDATED Q41229: Photosystem I reaction center subunit IV B, chloroplast precursor (PSI-E B) [Contains: Photosystem I reaction center subunit IV B isoform 2]	AATGAAGGAGTGGCAGTAATTATTAGTTCAAGGTTTTCCATATTTGTAATATGTCCAGCC	7.9	6.9	7.6	10.1	8.1	10.9	-2.2	0.00072	0.031
MICRO.10585.C3	MICRO.10585.C3_319	NP_001066148	4.13	glycolysis.PK	NOT VALIDATED NP_001066148: Os12g0145700 [Oryza sativa (japonica cultivar-group)]	GTACGTGCTGCCATTAAGGTCAAGGCATCTGTTATTATCTGCTTCACTTCTTCAGGGAGA	9.6	10.3	9.5	10.8	10.9	11	-1.1	0.00073	0.031
MICRO.13020.C2	MICRO.13020.C2_11	CAA63967	35.2	not assigned.unknown	NOT VALIDATED CAA63967: pom14 [Solanum tuberosum]	GCTTATTGGGGTGAGTAATCTGCACAAGATCCACCCGTATATAAATTTTAAAATGGGTTG	7.3	8.2	6.9	8.9	8.8	8.8	-1.4	0.00069	0.031
MICRO.13116.C1	MICRO.13116.C1_368	NP_181797	35.2	not assigned.unknown	NOT VALIDATED NP_181797: triacylglycerol lipase [Arabidopsis thaliana]	TTGGGAATGGGGAATTTGTTCACTTGGCAAATATTTTTGTTTGTTGATATTGCTTTGGAC	7.6	7.5	7.4	9.2	8.9	8.4	-1.3	0.0007	0.031
MICRO.16236.C1	MICRO.16236.C1_487	ABO78414	35.1	not assigned.no ontology	NOT VALIDATED ABO78414: HAD-superfamily hydrolase subfamily IA, variant 3 [Medicago truncatula]	TTTCATTGTTGATGTGGCTAGCTCCTCTTCTTTTTGTTAATAATGGTAACTTGAATGTGG	6.9	6.6	6.9	7.4	7.8	8.1	-0.9	0.00071	0.031
MICRO.2145.C1	MICRO.2145.C1_865	AAL49957	25	C1-metabolism	NOT VALIDATED AAL49957: GTP cyclohydrolase I [Lycopersicon esculentum]	GGGAATGCTGATGTCTGGACTGATTTGTGGAGTCTACTGAAATTCAGAGGTATAAGCATA	8.1	8.2	7.9	7.2	6.9	7.5	0.9	0.00071	0.031
MICRO.2242.C1	MICRO.2242.C1_710	ABO78893	35.1	not assigned.no ontology	NOT VALIDATED ABO78893: ChaC-like protein [Medicago truncatula]	GCAATTGGTTTTCTATATCCAATGGCATGTTAGAGGGGAAAATAATACATACACTAATGG	8.6	9.2	8.2	9.8	9.2	9.8	-0.9	0.00072	0.031
MICRO.3494.C2	MICRO.3494.C2_1549	Q9FEW9	17.7.1.5	hormone metabolism.jasmonate.synthesis-degradation.12-Oxo-PDA-reductase	NOT VALIDATED Q9FEW9: 12-oxophytodienoate reductase 3 (12-oxophytodienoate-10,11-reductase 3) (OPDA-reductase 3) (LeOPR3)	CGTTCTTAAGGACTTTCTGGTGAATGTCAGGAAGAAATTTGTACTGTTAAAAACATTAGG	8.3	9	8.6	9.5	9.4	9.7	-0.9	0.00074	0.031
MICRO.4777.C3	MICRO.4777.C3_736	AAG16758	26.09	misc.glutathione S transferases	NOT VALIDATED AAG16758: putative glutathione S-transferase T3 [Lycopersicon esculentum]	TTGTTTGTATGATCAAAGTACTTTTGGATATGCTTTCTGGACTATGTGTCATGTATCAGG	11.4	9.1	13.1	8.2	7.9	8.2	3.1	0.00072	0.031
MICRO.4844.C3	MICRO.4844.C3_966	NP_172208	35.2	not assigned.unknown	NOT VALIDATED NP_172208: unknown protein [Arabidopsis thaliana]	GATAACGACAAGGGTGTCCAAGATAATTTCGGTTTGCTACATTTGATCATCAACTGCTTC	10	11.8	9.3	11.6	12.8	12.7	-2	0.00074	0.031
MICRO.4979.C2	MICRO.4979.C2_1787	Q40517	30.6	signalling.MAP kinases	NOT VALIDATED Q40517: Mitogen-activated protein kinase homolog NTF3 (P43)	TTTGAGCATGTACTTCTTAATCTGTATATAGGTGTGGTTTTGTACGTCTAATTAAGGACC	11.7	12.5	11.1	12.9	13.3	12.8	-1.2	0.00074	0.031
MICRO.5597.C1	MICRO.5597.C1_886	NA	35.2	not assigned.unknown	NOT VALIDATED NA: NA	CACCATAGTCACGAGTGTGTTGCATTTTCTGATGTAATCATTCAGAAGAGATTCAGCTGT	7.9	6.8	7.7	6.7	5.9	6.7	1	0.00072	0.031
MICRO.5868.C1	MICRO.5868.C1_722	NP_172143	35.1	not assigned.no ontology	NOT VALIDATED NP_172143: RNA binding [Arabidopsis thaliana]	TTTTGAAAGAGATGGCTTCTACATTGGCCAAGCAACAGGCAATTGATGTCAAAGAGCTGG	7.8	7.8	7.6	6.7	6.9	7.2	0.8	0.00072	0.031
MICRO.5884.C1	MICRO.5884.C1_724	NP_191093	1.01.01.02	PS.lightreaction.photosystem II.PSII polypeptide subunits	NOT VALIDATED NP_191093: calcium ion binding [Arabidopsis thaliana]	GCCCTCACTGTAGTCTGCATTGGCAATGGAAAGTTCTACACATTGACAACTGGTGCAAAT	8.4	8	8.6	9.3	9.2	9.1	-0.9	0.00074	0.031
MICRO.6656.C4	MICRO.6656.C4_250	NA	35.2	not assigned.unknown	NOT VALIDATED NA: NA	AGCAAGCTATGGAGGCTATTATATTGTAGGGAGTTCCTCAATTATAGCGGAAAAATAAAC	15.8	15.1	15.4	14.7	14.6	14.7	0.8	0.00071	0.031
MICRO.7497.C3	MICRO.7497.C3_1459	NP_001049439	34.12	transport.metal	NOT VALIDATED NP_001049439: Os03g0226400 [Oryza sativa (japonica cultivar-group)]	GTGTATATTCATATGATCCAGCATAAGGGATTGTTGAAAGAGAGGATATAAAGAACTTGG	10.1	10.9	9	11.3	11.7	11.7	-1.6	0.00072	0.031
MICRO.8900.C1	MICRO.8900.C1_395	NA	35.2	not assigned.unknown	NOT VALIDATED NA: NA	CTTTTCAGTATTGTATGTGATGTACGAGTTACGTCTTATCAATCTTGATGTACTAGATGG	6.3	6	6.2	6.7	7.4	8.2	-1.2	0.00074	0.031
POCC196TV	POCC196TV_494	NA	35.2	not assigned.unknown	NOT VALIDATED NA: NA	TGTGGGTTGTGGTTCTGGTCTCCTTTTCCTTTCCAGCTGCGCTTTTGTTTTGCAAAGTTT	6.7	6.8	6.8	7.7	7.1	7.9	-0.8	0.00069	0.031
PPCBL09TH	PPCBL09TH_749	P10708	1.01.02.01	PS.lightreaction.photosystem I.LHC-I	NOT VALIDATED P10708: Chlorophyll a-b binding protein 7, chloroplast precursor (LHCI type II CAB-7)	ATGGTGACATCCACAGCCCTATGTTGTTTGCTGGTAGATTTGGCTAGCACATCACCAATA	8.2	8.3	8	10.2	8.8	10.5	-1.6	0.0007	0.031
PPCCQ52TH	PPCCQ52TH_356	P26574	1.03.02	PS.calvin cyle.rubisco small subunit	NOT VALIDATED P26574: Ribulose bisphosphate carboxylase small chain 1, chloroplast precursor (RuBisCO small subunit 1)	AGTGTATCAGTTTCATTGCCTACAAGCCCAGAAGGCTACTAAGTTTCATATTAGGACCAA	7.3	8	7.3	9.7	9.3	9.9	-2.1	0.00072	0.031
SDBN004I20u.scf	SDBN004I20u.scf_503	NP_851193	34.15	transport.potassium	NOT VALIDATED NP_851193: FIP2; protein binding / voltage-gated potassium channel [Arabidopsis thaliana]	GCATAATTAGCAATTATGGCACCACTAACATTACGCAGTGGAGCACGCTCTATAAGAAAA	6.4	6.6	6.1	7.3	7.1	7.2	-0.9	0.00072	0.031
SDBT001O01x.scf	SDBT001O01x.scf_634	ABC01900	27.3.99	RNA.regulation of transcription.unclassified	NOT VALIDATED ABC01900: RRM-containing RNA-binding protein-like protein [Solanum tuberosum]	AGCTGCAGCACAACAACCTTAATTTTTACTGTTTGTCTTAGGTGCTTTGATCAAGAAGAA	10.2	10	10	9.6	9.4	9.3	0.6	0.00071	0.031
STMGQ31TV	STMGQ31TV_732	NA	35.2	not assigned.unknown	NOT VALIDATED NA: NA	TGGATATTTCATATTATGCCTACATAGTTACATAAGTCTTTCATATTGCATAGGAGCGGG	6.9	7.1	7.1	7.7	8.5	7.7	-1	0.00074	0.031
STMGS19TV	STMGS19TV_725	NA	35.2	not assigned.unknown	NOT VALIDATED NA: NA	CTCTTGATGATAGATAGCCTACTTATTGTTGGTTCAATGTATGACAAGTTGATGATGTTC	10.8	11.1	11	11.7	12.1	11.5	-0.8	0.00071	0.031
TBSK03556FA04.t3m.scf	TBSK03556FA04.t3m.scf_339	NA	35.2	not assigned.unknown	NOT VALIDATED NA: NA	GTACCTTTTCACTTCAAACATAGCCCTCATATTTTCACATTCTAGTACTGGCCAATATGA	10.3	11.2	9.4	12	12.5	12.1	-1.9	0.00072	0.031
ACDA00728E08.T3m.scf	ACDA00728E08.T3m.scf_227	AAR83891	29.5.11.03	protein.degradation.ubiquitin.E2	NOT VALIDATED AAR83891: ubiquitin-conjugating enzyme 8 [Capsicum annuum]	CGATTTCCAAGTTTAAGTTGTTCTCGAGAAAGCTAAAAGAGGGTGCTGCTGTCAATCTGC	8.5	8.1	8.4	8	6.9	6.7	1.1	0.00078	0.032
bf_arrayxxx_0017a10.t7m.scf	bf_arrayxxx_0017a10.t7m.scf_644	Q41433	20.1.07.06	stress.biotic.PR-proteins.proteinase inhibitors	NOT VALIDATED Q41433: Probable serine protease inhibitor 6 precursor (AM66)	CTGATGTCTCACTTCATAGCAAGTCCCAGTCATCAACAAATGTCTGCCTGCTAGACGTAT	14.4	15.4	13.5	15.9	15.9	16	-1.5	0.00075	0.032
bf_arrayxxx_0020a02.t7m.scf	bf_arrayxxx_0020a02.t7m.scf_1	NA	20.2.4	stress.abiotic.touch/wounding	NOT VALIDATED NA: NA	TCTAGTATGCGATGGTAAGATTAAACGCGGCATGCTTTGGGATTCTGTTGCTTTTTGGTT	10.8	9.5	13.1	8.9	8.6	8.7	2.4	0.00077	0.032
bf_arrayxxx_0044h03.t7m.scf	bf_arrayxxx_0044h03.t7m.scf_56	NA	35.2	not assigned.unknown	NOT VALIDATED NA: NA	TACTGCATGTGCTTTACACTTGCTGCTTGATGTATGCACAGTATTTGTTTGATGAAGCAC	7.8	7.8	7.7	7.3	7.2	6.5	0.8	0.00078	0.032
bf_cswbxxxx_0012c10.t3m.scf	bf_cswbxxxx_0012c10.t3m.scf_23	NA	35.1	not assigned.no ontology	NOT VALIDATED NA: NA	GCCAGATTCCGGAAGGTTCTCCGGTTTGATCATCTTGAAGCTTCATCTTTTACTTACAAT	7.4	7.5	6.9	8.8	8.5	7.8	-1	0.00079	0.032
bf_cswbxxxx_0039a05.t3m.scf	bf_cswbxxxx_0039a05.t3m.scf_102	NA	20	stress	NOT VALIDATED NA: NA	TTGATTCTTCAACAAGTAGCAGCTAGGTCGGCTAGCAAGTAGGACAGAAAAGGAGCCAAT	9.1	8.4	8.4	7.6	6.9	8.1	1.1	0.00074	0.032
bf_ivrootxx_0001d07.t3m.scf	bf_ivrootxx_0001d07.t3m.scf_463	AAK14060	20.2.99	stress.abiotic.unspecified	NOT VALIDATED AAK14060: major latex-like protein [Prunus persica]	CTATTGATGATCACCATGCCAATTGATGAATAATTGATAGGATCTATGTTGCTCAGACTA	12.3	12.9	12	13.3	13.5	13.4	-1	0.00075	0.032
bf_ivrootxx_0018c11.t3m.scf	bf_ivrootxx_0018c11.t3m.scf_555	NP_566237	35.1.5	not assigned.no ontology.pentatricopeptide (PPR) repeat-containing protein	NOT VALIDATED NP_566237: unknown protein [Arabidopsis thaliana]	ATCTGTTTCTGATATGTTCTTCTCTGTATCGTTCCAATTTTATCATAAAGTCCACGAAGG	7.9	7.7	7.4	8.8	8.7	8.2	-0.9	0.00075	0.032
bf_mxflxxxx_0007d02.t3m.scf	bf_mxflxxxx_0007d02.t3m.scf_287	CAC86383	29.5.05	protein.degradation.serine protease	NOT VALIDATED CAC86383: carboxypeptidase type III [Theobroma cacao]	CATTCTCATGCTGCTAGGTAACTTTTGGAACCCTAGGGTGATTTCTATTATGTTGTGGTT	6.5	6.4	6.6	6.9	7.5	8.7	-1.2	0.00076	0.032
bf_mxlfxxxx_0010g09.t3m.scf	bf_mxlfxxxx_0010g09.t3m.scf_560	NA	35.2	not assigned.unknown	NOT VALIDATED NA: NA	AGTGTTCCAACTGTCAATAGGTGAAGGTTGAACATCTTAAGCCTAGGGGCTAGACTAGGA	10.9	9.8	11.2	9.5	9.4	9.7	1.1	0.00079	0.032
bf_mxlfxxxx_0026b11.t3m.scf	bf_mxlfxxxx_0026b11.t3m.scf_170	NA	35.2	not assigned.unknown	NOT VALIDATED NA: NA	CTGTAGTAGCTTTTGTTCACTCAGGATTTCAACAGTGTAGTGGTATATGATTACCATGGT	10	10.7	9.6	11.1	11.4	10.9	-1	0.00078	0.032
bf_mxlfxxxx_0059g04.t3m.scf	bf_mxlfxxxx_0059g04.t3m.scf_551	ABK96797	27.3.27	RNA.regulation of transcription.NAC domain transcription factor family	NOT VALIDATED ABK96797: NAC domain protein NAC2 [Solanum tuberosum]	TACTGTGCCTCAATCCAAAACAAGTTGATCAGTCGCGGACTACTAGTATCTCATCAACAA	12.4	12.3	14.2	11.7	10.2	11.4	1.8	0.00078	0.032
cSTS10N19TH	cSTS10N19TH_610	AAP42502	20.2.99	stress.abiotic.unspecified	NOT VALIDATED AAP42502: peroxiredoxin [Ipomoea batatas]	TTTCTCCTTTCTCCAAATAGTCTGCATACTTTCATGTATGGGGTGTGTCACAATGTTTTT	10.7	11.7	10.4	12.1	12	12	-1.1	0.00079	0.032
MICRO.10973.C1	MICRO.10973.C1_644	ABO83591	35.1	not assigned.no ontology	NOT VALIDATED ABO83591: Glycosyl transferase, family 17 [Medicago truncatula]	CGTCTTGCTTCATCTGCTAGTTTTAGACCTTAGTGTTGTTTTTCCACTCAAGTTTGCAGA	8.6	8.9	8.2	9.2	9.6	9.4	-0.8	0.00077	0.032
MICRO.11433.C1	MICRO.11433.C1_647	NP_568464	35.2	not assigned.unknown	NOT VALIDATED NP_568464: RNA binding / nucleic acid binding [Arabidopsis thaliana]	TCATACTGAAAATTCTGCTCCATCTAGTCGGTTTGATGAACTGCCCGATGACTTTGATCC	7.6	8.1	7.4	6.5	7	6.6	1	0.00076	0.032
MICRO.1226.C3	MICRO.1226.C3_675	NA	35.1	not assigned.no ontology	NOT VALIDATED NA: NA	GCTTTAACGAAAAAAGGTGCCAATAGATTCCATTATGTACGTGTATTCCGAGATAAGGAA	7.1	7.4	7	8.2	8.2	7.5	-0.8	0.00078	0.032
MICRO.12808.C1	MICRO.12808.C1_1235	AAO85509	20.1.03	stress.biotic.signaling	NOT VALIDATED AAO85509: SGT1 [Nicotiana benthamiana]	ATAGAAATTTTGATCTATGGGATATGGCAATTTCCTTGTGAACTTCCCAGTTCGCCACAT	7.8	8	8.6	7.5	6.4	6.5	1.3	0.00075	0.032
MICRO.14318.C1	MICRO.14318.C1_1186	ABN13629	26.19	misc.plastocyanin-like	NOT VALIDATED ABN13629: blue copper-like protein [Gossypium hirsutum]	ACTGCTTTTACTATTTGCTTTGCTCTTAATTTGTAAGTGGTTGGGTTGATACATGTCTTG	6.7	6.6	6.2	6.9	7.5	7.8	-0.9	0.00076	0.032
MICRO.14858.C1	MICRO.14858.C1_1085	AAP54423	35.1	not assigned.no ontology	NOT VALIDATED AAP54423: KH domain containing protein, expressed [Oryza sativa (japonica cultivar-group)]	CATTCAACTTCCTTGTGGTTTAAGGTGTTGCAGTTAACTGCCTAATTTGATTTCTTTGTA	10.4	9.9	10.8	9.4	9.6	9.5	0.9	0.00076	0.032
MICRO.15378.C1	MICRO.15378.C1_644	ABO78644	35.2	not assigned.unknown	NOT VALIDATED ABO78644: Protein of unknown function DUF543 [Medicago truncatula]	GCCTCTGGGCTTATGAAGTAGAAATTGTTGAATAAAGTTTCCTCCCTTTCCAAATTTTTC	9.2	9.5	9.7	8.4	8.7	8.3	1	0.00079	0.032
MICRO.1811.C6	MICRO.1811.C6_939	ABB87109	29.4	protein.postranslational modification	NOT VALIDATED ABB87109: protein tyrosine phosphatase-like [Solanum tuberosum]	TGCAGATGTAGAATGAAGGAAGTGAACGCACAGCATACTTATTACTTACAATTATAAGTG	11.8	12.8	12.2	13.4	13.3	13.5	-1.1	0.00077	0.032
MICRO.2201.C1	MICRO.2201.C1_756	NP_001041874	29.5.11.04.02	protein.degradation.ubiquitin.E3.RING	NOT VALIDATED NP_001041874: Os01g0121200 [Oryza sativa (japonica cultivar-group)]	CTGCAGAGAGGATGGATGACTGCGAAAAGAATACACATTCGCGTAATGCAGTTGGTGTTT	9.1	9.1	9.8	8.8	8	7.9	1.1	0.00075	0.032
MICRO.2650.C1	MICRO.2650.C1_1620	P30173	31.1	cell.organisation	NOT VALIDATED P30173: Actin-101	TCTGTAATCTGTATCGTCTCATGCTTTATACCATGAGAGGCATTGTAATGGCAGAATAAA	11	11.7	10.7	10	10.2	8.9	1.4	0.00075	0.032
MICRO.4354.C1	MICRO.4354.C1_1167	NP_001048111	35.2	not assigned.unknown	NOT VALIDATED NP_001048111: Os02g0745600 [Oryza sativa (japonica cultivar-group)]	GACACTGTGATAGGCAATCCTGATGTTCACAGAAGACGAGCATTGGTAGAGTCACATGAT	11.9	10.9	11.6	10.4	10.2	10.6	1.1	0.00076	0.032
MICRO.4488.C1	MICRO.4488.C1_445	NA	35.2	not assigned.unknown	NOT VALIDATED NA: NA	GTCCTGTGGATTACGGATTGTGTGCTATTTTGGTGAATGGCTTTTGCAAGAATGATATGG	7.7	7.2	7.3	8.2	7.9	8.1	-0.7	0.00077	0.032
MICRO.765.C7	MICRO.765.C7_460	AAT44738	10.5.5	cell wall.cell wall proteins.RGP	NOT VALIDATED AAT44738: UDP-glucose:protein transglucosylase-like protein SlUPTG1 [Lycopersicon esculentum]	CTGGATTTTACTTGTTTTAATTTTGGTTGAGATTTAGGTTTCATATTGCTGCTGCTGCTG	9	9.6	8.9	9.8	10.1	10	-0.8	0.00079	0.032
MICRO.7670.C1	MICRO.7670.C1_762	NA	35.2	not assigned.unknown	NOT VALIDATED NA: NA	GGTAACTATATTCACCCATAAAATTAATTTCTGGGGTGTGTTAGCCTAATTTTTTGGTGG	6.6	6.7	6.6	7.5	7	7.6	-0.7	0.00075	0.032
MICRO.8393.C1	MICRO.8393.C1_792	AAD49976	27.3.20	RNA.regulation of transcription.G2-like transcription factor family, GARP	NOT VALIDATED AAD49976: F24J5.9 [Arabidopsis thaliana]	AGCATTTCATCCTTTCAAGAAAGAGAAAAAATGTTGTCGCCGGCCGTAGAAACAACGCCA	8.7	7.7	9.2	7.6	6.6	7	1.5	0.00078	0.032
MICRO.9058.C1	MICRO.9058.C1_547	ABC70867	27.3.99	RNA.regulation of transcription.unclassified	NOT VALIDATED ABC70867: mTERF-like protein [Brassica napus]	AGATGTACATCATTTAGCTTATCAAGATCCCATATTACTCGTTTCTAGTGTCGAGAATAC	8.5	9.2	7.9	10.1	9.7	10	-1.4	0.00077	0.032
MICRO.920.C3	MICRO.920.C3_542	CAA58220	2.1.2.02	major CHO metabolism.synthesis.starch.starch synthase	NOT VALIDATED CAA58220: starch (bacterial glycogen) synthase [Solanum tuberosum]	ATTACTTATTTTGTTTAGTTAGGTTCTACTGCATCAGTCTTTTTATCATTTAGGCCCGCG	7.2	7.3	7.2	8.4	8.5	8.3	-1.2	0.00075	0.032
MICRO.9353.C1	MICRO.9353.C1_957	AAK74003	30.1	signalling.in sugar and nutrient physiology	NOT VALIDATED AAK74003: AT5g39790/MKM21_80 [Arabidopsis thaliana]	TGTTGGAAGGTTAGTGCTGTAGGAGTGACATGCCGTCTCTTTGAGAATGTGATCTCAGAA	9.1	9.7	9.4	10.5	10.5	10.1	-1	0.00077	0.032
POABQ69TP	POABQ69TP_907	CAB43695	34.99	transport misc	NOT VALIDATED CAB43695: putative protein [Arabidopsis thaliana]	TCGGCTGTTATGTTATGCCCTTGAATCTGGTACATGACGAGTATTATTGTCCTCACGGGA	6.8	6.9	6.8	7.5	8.5	7.3	-0.9	0.00075	0.032
POACZ13TP	POACZ13TP_788	AAF16646	29.2.3	protein.synthesis.initiation	NOT VALIDATED AAF16646: T23J18.15 [Arabidopsis thaliana]	ACATCTGGCAGGTGGCACTCAAAGCAGCAGATTCATTCTCAAATGGATGTTGAGGTTGTT	9.3	8.1	8.4	7.5	6.8	7.3	1.4	0.00075	0.032
PotatoF1161.scf	PotatoF1161.scf_156	NA	35.2	not assigned.unknown	NOT VALIDATED NA: NA	TCAGCTCGGGTCGATTTGTTGGATCTTAATATATATGGAATTATGAATTGTTTCTTGCTC	10.1	9.1	9.6	12.4	12.1	10.8	-2.2	0.00078	0.032
SDBN005G06u.scf	SDBN005G06u.scf_558	NP_850206	35.1	not assigned.no ontology	NOT VALIDATED NP_850206: nucleotide binding / ubiquitin-protein ligase [Arabidopsis thaliana]	TTATGCCTTGCACAGGTTGCTTTTCCCTCTGGGCTCTCATTCTCAAGAAACAATGTGTAG	6.6	6.4	6.3	7.4	8	6.9	-1	0.00076	0.032
TBSK02196FG12.t3m.scf	TBSK02196FG12.t3m.scf_169	NA	33.1	development.storage proteins	NOT VALIDATED NA: NA	TCTTCAACGAAAAACTTGGAGAACACTTCGTGTGCATCAAGGCTTTGACAGAAGTTGCCA	13.3	14	12	14.8	14.9	15.1	-1.8	0.00079	0.032
bf_arrayxxx_0078h03.t3m.scf	bf_arrayxxx_0078h03.t3m.scf_575	P55748	29.5.05	protein.degradation.serine protease	NOT VALIDATED P55748: Serine carboxypeptidase II-2 precursor (CP-MII.2) [Contains: Serine carboxypeptidase II-2 chain A; Serine carboxypeptidase II-2 chain B]	TTTACGTGGTTGACACAGATTGCTGTGATCCCCAGTTACATCAACCCCGTTACAGCATTA	7.9	8.3	7.6	9	8.7	9.2	-1	0.00083	0.033
BF_CSCHXXXX_0034A10.T3M.SCF	BF_CSCHXXXX_0034A10.T3M.SCF_417	NA	35.2	not assigned.unknown	NOT VALIDATED NA: NA	TGTTGAAGAACAGATCTGGACAGCAACTGACAAAGCCATGCGTATCAAATACGAAGCTGC	7.8	7.7	7.6	6.7	7.5	6.4	0.8	0.00081	0.033
bf_cswbxxxx_0020d12.t3m.scf	bf_cswbxxxx_0020d12.t3m.scf_423	NP_199513	35.1.40	not assigned.no ontology.glycine rich proteins	NOT VALIDATED NP_199513: unknown protein [Arabidopsis thaliana]	TTTTGAGGAGAACATGATAGGGGTTTAGAAAGAGGTTTATTTTCATTAGAGGGTTTTTCC	9.7	11.1	8.9	12.1	12.4	11.2	-2	0.0008	0.033
BF_LBCHXXXX_0022E09_T3M.SCF	BF_LBCHXXXX_0022E09_T3M.SCF_528	NP_187100	35.1	not assigned.no ontology	NOT VALIDATED NP_187100: RNA binding / nucleic acid binding [Arabidopsis thaliana]	TTTGATGGACAAAGTTAGTCACAATTTCACTATACTCATGTCAATGAAAGGTAACAACGG	7.9	7.8	8.2	7.4	7.2	6.9	0.8	0.00084	0.033
BF_LBCHXXXX_0028A04_T3M.SCF	BF_LBCHXXXX_0028A04_T3M.SCF_274	NA	35.2	not assigned.unknown	NOT VALIDATED NA: NA	TATGTATCCATTTTGAAATAACTTCAAACAAAATCCTAATAAAGTTTAGCTTCAGATATT	7.4	7.7	7.8	6.7	7.1	7	0.7	0.00083	0.033
bf_mxflxxxx_0021h02.t3m.scf	bf_mxflxxxx_0021h02.t3m.scf_613	NP_180787	35.2	not assigned.unknown	NOT VALIDATED NP_180787: unknown protein [Arabidopsis thaliana]	GTTTGATCATAGTTGTTGAGATGACTAGGGCATTTGATGTTTTCAACTAATGGTAATTGC	7.6	7.7	7.6	7.9	8.6	8.7	-0.8	0.00083	0.033
bf_mxflxxxx_0069h01.t3m.scf	bf_mxflxxxx_0069h01.t3m.scf_190	NA	35.2	not assigned.unknown	NOT VALIDATED NA: NA	GCAAAAAGTGCATCGACTCTGGCAAGACCCCAGCTAACCAGCATCTTGATATAGATATTT	9.8	9	10.5	8.9	7.4	8.4	1.6	0.00084	0.033
bf_mxlfxxxx_0006d03.t3m.scf	bf_mxlfxxxx_0006d03.t3m.scf_676	AAG34873	29.2.3	protein.synthesis.initiation	NOT VALIDATED AAG34873: putative chloroplast RNA helicase VDL isoform 1 [Nicotiana tabacum]	CATGTTCAATTCTTCAAAAAGAAGTCAGCTCTCTTAAAAATGCTGTTGAACATCCTACTC	7.5	7.1	7.4	6.6	7	6.1	0.7	0.00082	0.033
bf_mxlfxxxx_0064c05.t3m.scf	bf_mxlfxxxx_0064c05.t3m.scf_433	NA	35.2	not assigned.unknown	NOT VALIDATED NA: NA	GGGTCTTGCTTGCTGATAGATTAATCGTAGTTTAATTGTGATTTTGTTTAGTACTTGTGG	6.5	6.6	6.6	7.7	7.4	6.9	-0.8	0.00081	0.033
bf_mxlfxxxx_0074b11.t3m.scf	bf_mxlfxxxx_0074b11.t3m.scf_275	NP_564506	35.2	not assigned.unknown	NOT VALIDATED NP_564506: unknown protein [Arabidopsis thaliana]	CTTAATGCCTCGTGCCTTCTCTAGCTCGCCATTTTCATCCCTATATTATTTCTGACATAG	6.5	6.6	6.6	7.5	7.2	7	-0.7	0.00083	0.033
bf_slmwxxxx_0004b11.t3m.scf	bf_slmwxxxx_0004b11.t3m.scf_284	NP_566460	35.2	not assigned.unknown	NOT VALIDATED NP_566460: cationic amino acid transporter [Arabidopsis thaliana]	ATATGGAGAAGCTTTTCCCAATTTTTAGTTATGGGTTATCGAGATATATGGCTATTTCGG	7.1	6.5	7.2	7.4	7.8	8.3	-0.9	0.00081	0.033
bf_suspxxxx_0031g09.t3m.scf	bf_suspxxxx_0031g09.t3m.scf_418	NP_188473	35.2	not assigned.unknown	NOT VALIDATED NP_188473: unknown protein [Arabidopsis thaliana]	TTATCATTTTCTTCAAAGAGCCCTTATCCTATATTGGTACATATTCCATTTGGGCCATCC	5.9	6	6.1	6.3	6.7	6.8	-0.6	0.00083	0.033
MICRO.10397.C2	MICRO.10397.C2_1	NA	35.2	not assigned.unknown	NOT VALIDATED NA: NA	CCAAAGCTGCCATCTCAAAAATCAACTTACTAAGTAATACGAAAAAGCCTTCCCTCATCG	8.7	8.5	8.6	8.2	7	7.2	1.1	0.00083	0.033
MICRO.11614.C1	MICRO.11614.C1_995	BAB01831	35.1	not assigned.no ontology	NOT VALIDATED BAB01831: unnamed protein product [Arabidopsis thaliana]	TACTACCATGGATGGATATTAAGTGCCCGTTTGGATTGGCTTAAAAAAGTAGTTTTTAAG	8.8	7.8	8.5	6.7	6.8	7.8	1.3	0.00084	0.033
MICRO.12375.C1	MICRO.12375.C1_1298	NA	35.2	not assigned.unknown	NOT VALIDATED NA: NA	CAAGTAGTTGTTCTGGGAACTGATTTGCTGTCAGTTTTTGGAGGCAACAATTTGAGGTAG	6.4	6.3	6.4	7.1	6.8	7.1	-0.6	0.00083	0.033
MICRO.13221.C1	MICRO.13221.C1_1612	NP_177077	27.3.28	RNA.regulation of transcription.SBP,Squamosa promoter binding protein family	NOT VALIDATED NP_177077: DNA binding / transcription factor [Arabidopsis thaliana]	CATGTGTTGCTGACAACAAGTACTCTCGTTCAATAATGAGTATATGTATTTCTTTTGTGG	7.3	8.2	7.2	8.5	8.6	8.8	-1	0.00083	0.033
MICRO.14154.C1	MICRO.14154.C1_653	CAA10760	35.1	not assigned.no ontology	NOT VALIDATED CAA10760: hypothetical protein [Arabidopsis thaliana]	TGGTCTAGAGTGTCTATATATTGGCATAAAAAATGGAGACTTCCTTATAGGTAACAGTGA	10.1	9.8	9.9	9.4	9.5	9.2	0.6	0.00083	0.033
MICRO.17000.C1	MICRO.17000.C1_1002	NP_187970	28.99	DNA.unspecified	NOT VALIDATED NP_187970: oxidoreductase, acting on paired donors, with incorporation or reduction of molecular oxygen, 2-oxoglutarate as one donor, and incorporation of one atom each of oxygen into both donors [Arabidopsis thaliana]	ATGCGGATTACACCAAACATCTTCTTCAACAAAGGTCATGATTGGGAAAGGACACAATAG	11.8	9.3	15.9	8.2	6.7	8.2	4.6	0.00083	0.033
MICRO.173.C5	MICRO.173.C5_546	NA	35.2	not assigned.unknown	NOT VALIDATED NA: NA	TTGTGAGGCTTGATACATTCAATTTCTTGCAGACAAAAAGCATAAATGAGTTCTTGAAGC	7.3	7.1	7.1	7.7	7.9	8.2	-0.8	0.00084	0.033
MICRO.2675.C2	MICRO.2675.C2_405	BAF42037	10.6.1	cell wall.degradation.cellulases and beta -1,4-glucanases	NOT VALIDATED BAF42037: cellulase2 [Pyrus communis]	AAGGTTGCATTATATATATGTGTGTGTGTATGTTAGTGTGTACCACATCAACTGTTCTAG	8	7.6	8.3	8.9	8.8	9.2	-1	0.00081	0.033
MICRO.3038.C1	MICRO.3038.C1_423	P56337	29.2.3	protein.synthesis.initiation	NOT VALIDATED P56337: Eukaryotic translation initiation factor 5A-5 (eIF-5A-5) (eIF-4D)	AAGGATGACTTGAGGCTCCCAACTGATGATACTCTTCTGGCTCAGGTCAAAGATGGTTTT	15.2	15	15	14.3	14.2	14.6	0.7	0.0008	0.033
MICRO.331.C94	MICRO.331.C94_581	NP_566429	1.01.01.02	PS.lightreaction.photosystem II.PSII polypeptide subunits	NOT VALIDATED NP_566429: DNA binding / zinc ion binding [Arabidopsis thaliana]	TTTTTTGGTATTTTCAAAGTTGTTGAAGCAGTCAAGGGTGGTGGGTGGGGTGTTGTGTTG	14.8	14.3	14.3	13.8	13.7	13.6	0.8	0.00081	0.033
MICRO.3865.C1	MICRO.3865.C1_928	Q38732	33.99	development.unspecified	NOT VALIDATED Q38732: DAG protein, chloroplast precursor	GTCAGTATGTAATTTTGATCGTTACCAGGTTATTCTATGTTCAAAGCCTGAATATGTACG	10.1	10.6	9.8	11.4	11.1	10.8	-0.9	0.00083	0.033
MICRO.4177.C6	MICRO.4177.C6_167	ABE83768	1.01.02.02	PS.lightreaction.photosystem I.PSI polypeptide subunits	NOT VALIDATED ABE83768: Photosystem I reaction centre subunit N [Medicago truncatula]	TAATCATTAAGGCTCAACAACAATCCAGCTCCAACTCCAACATGGACAAGGACCAAATAG	7.4	6.6	7	8.7	7.9	8.5	-1.4	0.00084	0.033
MICRO.4431.C1	MICRO.4431.C1_2605	AAB97152	19.1	tetrapyrrole synthesis.magnesium chelatase	NOT VALIDATED AAB97152: Mg protoporphyrin IX chelatase [Nicotiana tabacum]	CAATTTCTGATGTGAATTCCTTTGATAGTCCCCAGTGTAATTTTTGTTCATTTTTTGGGG	9.6	10.5	8.4	11.6	11	11.6	-1.9	0.00084	0.033
MICRO.4841.C1	MICRO.4841.C1_1678	NP_193989	26.02	misc.UDP glucosyl and glucoronyl transferases	NOT VALIDATED NP_193989: catalytic [Arabidopsis thaliana]	TGGTGTAGAGATAGTTTTGTATTCCTCATTTCCACTGATAATGAATCAATGTAAAGGCAG	8	8.5	7.9	9.2	8.9	8.8	-0.8	0.00084	0.033
MICRO.5780.C3	MICRO.5780.C3_247	NP_001061950	29.5.11.04.02	protein.degradation.ubiquitin.E3.RING	NOT VALIDATED NP_001061950: Os08g0451800 [Oryza sativa (japonica cultivar-group)]	GGAGACAAAAGTTACAAATGAAATGTTCAAACTCGAAAATTGCTCTGATCACTCATTCTG	8.1	8.4	9.4	6.8	7.9	7.1	1.4	0.00084	0.033
MICRO.6915.C1	MICRO.6915.C1_1619	P51819	20.2.1	stress.abiotic.heat	NOT VALIDATED P51819: Heat shock protein 83	AGAGAGCAAGAAGGCAGTTGAGAACTCTCCGTTCTTGGAGCGTCTCAAGAAAAAAGGATA	13.6	12	14.1	11.7	11.8	11.6	1.5	0.00082	0.033
MICRO.6965.C1	MICRO.6965.C1_916	NP_190458	21.02	redox.ascorbate and glutathione	NOT VALIDATED NP_190458: ATMP2 [Arabidopsis thaliana]	AGAGGTATGTATCAGTCACTTAGATTTCATTAATAGATGAGACAATGGATCAAAACCCTC	9.3	8.5	9.4	8.3	8.2	7.1	1.2	0.0008	0.033
MICRO.7448.C1	MICRO.7448.C1_970	NP_197383	29.6	protein.folding	NOT VALIDATED NP_197383: EMB3007; ATP binding / protein binding [Arabidopsis thaliana]	TCTATCAGTAGTTTCGATCAGTGGGATACGATTATACCAAATGCCTTGAAGCAAAGATGA	9.2	8.5	9.2	8.1	7	8.2	1.2	0.00081	0.033
MICRO.8080.C1	MICRO.8080.C1_505	AAS67371	35.1	not assigned.no ontology	NOT VALIDATED AAS67371: CONSTANS interacting protein 3 [Lycopersicon esculentum]	CAGATTAAGGCGATAATAAATGCTTTCTAGCTTTTCTCTGGATAATGGTCATACTTTGAG	13.1	13.3	12.9	13.8	13.8	13.8	-0.7	0.00081	0.033
MICRO.9254.C1	MICRO.9254.C1_584	AAY85661	7.3	OPP.electron transfer	NOT VALIDATED AAY85661: heterotrophic ferredoxin 2 [Helianthus annuus]	ACCTTGAAGATTGAAGGCAATACAAATCCTGTGCCGTGGACGCAGAAAAGAAATAAATTA	7.8	8.1	8.5	7.4	6.9	7.3	0.9	0.00084	0.033
MICRO.9453.C1	MICRO.9453.C1_670	NA	35.2	not assigned.unknown	NOT VALIDATED NA: NA	TAGATCTCCAGTCTCCTGACTTTCTGATGTCATAGGAGAAGATGACAAATATTTGCATTT	6.8	6.9	6.8	7.2	8.5	7.8	-1	0.00083	0.033
MICRO.9957.C1	MICRO.9957.C1_678	NA	35.2	not assigned.unknown	NOT VALIDATED NA: NA	AGAACTTTGGAGCTTTTATTTGAGCAAACAAGATTCTCCCTTCAATTTTTCACATGTCTC	10.6	11.4	10.4	12	12.2	11.8	-1.2	0.0008	0.033
POADO21TV	POADO21TV_461	BAB02004	29.5.09	protein.degradation.AAA type	NOT VALIDATED BAB02004: unnamed protein product [Arabidopsis thaliana]	ATCGCAGGCTTGCAGGTCTGTCTGTTCTCCATGGATTACTTCCTCATGAATTTCTCTCTT	10.7	9.1	11.5	8.5	8.8	8.3	1.9	0.00083	0.033
SDBN006D16u.scf	SDBN006D16u.scf_61	NP_197938	29.5.11.04.02	protein.degradation.ubiquitin.E3.RING	NOT VALIDATED NP_197938: protein binding / ubiquitin-protein ligase/ zinc ion binding [Arabidopsis thaliana]	GGTGAGGGTATTTTCAGAACTGTTCTTATTGCTGCCTCAAAGTGCCATACGAGCTTCAAG	11.2	10.1	10.3	9.3	9.4	8.4	1.5	0.0008	0.033
SSBN001N20u.scf	SSBN001N20u.scf_697	ABO84341	31.1	cell.organisation	NOT VALIDATED ABO84341: Dilute [Medicago truncatula]	AACTATATAGGCTTAGTCCCCGGTCTTCCACATTTCTTTCCATGAAACTTGGAGATGTAC	6.1	6.2	6.2	6.5	7	6.8	-0.6	0.0008	0.033
STMHG75TV	STMHG75TV_992	NA	4.04	glycolysis.PPFK	NOT VALIDATED NA: NA	ACAGTGATTGTCCATCTCCACTACAAATCTTATCTGGCACCTGGGTTAGATTTGTTTGCT	7.7	7.4	8.3	6.9	6.9	7	0.8	0.00083	0.033
bf_arrayxxx_0003a06.t7m.scf	bf_arrayxxx_0003a06.t7m.scf_745	XP_001118310	29.5.11.20	protein.degradation.ubiquitin.proteasom	NOT VALIDATED XP_001118310: PREDICTED: similar to proteasome (prosome, macropain) 26S subunit, ATPase 2, partial [Macaca mulatta]	TTCGTCGGATAATTTGCCACTGTTCCAGCTTTTTTAGTGTACTGCATTCATAGCTTGCAA	7.7	7.1	7.6	7.9	9	8.4	-0.9	0.00085	0.034
bf_ivrootxx_0028c04.t3m.scf	bf_ivrootxx_0028c04.t3m.scf_4	ABA40431	35.1	not assigned.no ontology	NOT VALIDATED ABA40431: unknown [Solanum tuberosum]	AAACACGGCACAAAGAGATACTCTCCAATCTTCTTCTTCTTCTTCTCTCTCAACTGTAAA	12.3	9.8	13	9.2	8.7	9.3	2.6	0.00087	0.034
BF_LBCHXXXX_0018F05_T3M.SCF	BF_LBCHXXXX_0018F05_T3M.SCF_296	NA	35.2	not assigned.unknown	NOT VALIDATED NA: NA	ACTTATATTTCTCAATCCCCTCGGTAGAACATTATCAGTTGTAAATATACCATCGCCCTG	6.7	6.9	6.7	7.8	7.2	8.2	-1	0.00086	0.034
bf_mxflxxxx_0057d07.t3m.scf	bf_mxflxxxx_0057d07.t3m.scf_542	AAF22139	27.3.24	RNA.regulation of transcription.MADS box transcription factor family	NOT VALIDATED AAF22139: MADS box protein [Capsicum annuum]	AAAGAACCAATTGATGCATGAATCCCATTTCTGCGCTGCAAAAGAAGGACAAGGGCATTG	10.4	9.5	11.3	9.1	8.7	9.2	1.4	0.00086	0.034
bf_slmwxxxx_0014g06.t3ma.scf	bf_slmwxxxx_0014g06.t3ma.scf_174	NA	20.2.1	stress.abiotic.heat	NOT VALIDATED NA: NA	ACAGTACTTTATTTCATCAAAGTATTCAAGTCCTGTTCTGGGGTTGATAATAGGGCTGAT	12.1	12	11.9	11.4	11.6	11.1	0.6	0.00086	0.034
bf_stolxxxx_0008h05.t3m.scf	bf_stolxxxx_0008h05.t3m.scf_378	CAA11075	35.2	not assigned.unknown	NOT VALIDATED CAA11075: acid phosphatase [Glycine max]	TTACTACGCTCGATCCGACGTTGCTTTTTGGGGCTATAGGCGTACAACAACACAAAGTTT	8	9.2	8	10.9	9.6	10.2	-1.9	0.00085	0.034
bf_stolxxxx_0068b06.t3m.scf	bf_stolxxxx_0068b06.t3m.scf_331	NA	35.2	not assigned.unknown	NOT VALIDATED NA: NA	TCATTTGTGGAATGTATCCAGGCATATGTATCCAGTGTACGATGGACACGTGTCGATCCT	5.8	6.5	5.8	6.6	7	7.5	-1	0.00088	0.034
cPRO2E23TH	cPRO2E23TH_347	AAF79901	27.3.99	RNA.regulation of transcription.unclassified	NOT VALIDATED AAF79901: Contains similarity to an unknown mRNA from Triticum sativum gb|AF004816 and contains a Lipase/Acylhydrolase with GDSL-like motif PF|00657 and FYVE zinc finger PF|01363 domain. ESTs gb|AV541158, gb|AA394699, gb|AI993442, gb|T88167, gb|BE038227, gb|AI993489, gb|T88521 come from this gene. [Arabidopsis thaliana]	GGAAAGCAACGACAAAAGTGCTGCATTGCCAAGTCATGAGGACCCTTACAGAAACTCAAA	9	8.3	8.7	8.2	6.8	7.2	1.3	0.00086	0.034
cSTE8N22TH	cSTE8N22TH_567	BAB08494	28.99	DNA.unspecified	NOT VALIDATED BAB08494: exonuclease-like protein [Arabidopsis thaliana]	TAATGCTGCTGGTAAAAGTCGTGCTAATGGAAATACTAATTTGGAGGGGATGGGCTTGCG	8.3	8.5	8.1	7.7	6.2	7.4	1.2	0.00089	0.034
MICRO.1051.C1	MICRO.1051.C1_1434	BAB93004	19.14	tetrapyrrole synthesis.protochlorophyllide reductase	NOT VALIDATED BAB93004: NADPH:protochlorophyllide oxidoreductase [Nicotiana tabacum]	TTCAGGTAGGTAGGCAACAAGTTCTTGTAATGATATGAACAACTCAATTCTCGAGATCGT	8	8.2	8.6	10.1	9.1	10.8	-1.8	0.00087	0.034
MICRO.11645.C1	MICRO.11645.C1_1642	AAX96859	13.1.4.1	amino acid metabolism.synthesis.branched chain group.common	NOT VALIDATED AAX96859: acetolactate synthase, small subunit, putative [Oryza sativa (japonica cultivar-group)]	ATCCTACTTGTGGGATTACACTGTGTATGTTGTTGTTGTCGAGTTTCTTTCTTGCTGACC	9.6	9.7	9.6	10.1	10.2	10.7	-0.7	0.00088	0.034
MICRO.11959.C2	MICRO.11959.C2_621	NP_001031690	11.8.1	lipid metabolism.'exotics' (steroids, squalene etc).sphingolipids	NOT VALIDATED NP_001031690: diacylglycerol kinase [Arabidopsis thaliana]	TTTTCTTCATACTTGGGGCTCAAACCTGAGACCTCTACTTAAGGGAAACAATATTACTAA	6.4	6.3	6.3	7.1	7.1	6.7	-0.6	0.00086	0.034
MICRO.12516.C2	MICRO.12516.C2_408	NA	35.2	not assigned.unknown	NOT VALIDATED NA: NA	GCATGTTCATTTATTACTACCACAAAATAAAAAAGAAAGCTGGGTTTATCGGTACCAAGG	10.2	10.1	10.6	9.6	9.6	9.7	0.6	0.00086	0.034
MICRO.12935.C3	MICRO.12935.C3_555	NP_565978	35.2	not assigned.unknown	NOT VALIDATED NP_565978: unknown protein [Arabidopsis thaliana]	AGATAGTAGACGATACACAAACCTATGAGGTTATTGCTGAACACTTAAAGGGATTTGCTA	10	11	9.7	11.5	11.7	11.3	-1.2	0.00088	0.034
MICRO.14198.C1	MICRO.14198.C1_1439	NP_200888	34.12	transport.metal	NOT VALIDATED NP_200888: metal ion binding [Arabidopsis thaliana]	CTTTTCCTTTGTGGCAATTGCATTCATTGGTTTATTTGCTCGTTTAGGCATTCATTGATG	6.5	5.9	6.1	6.9	6.7	7.2	-0.8	0.0009	0.034
MICRO.14514.C1	MICRO.14514.C1_1213	NP_566917	30.3	signalling.calcium	NOT VALIDATED NP_566917: calmodulin binding [Arabidopsis thaliana]	TAATAAATGGATGGCAACTTACAGTCCGGAATCAAGTGGCGATGATCGGGCTTCACCATT	9	7.7	9	7.4	6.8	6.8	1.6	0.00085	0.034
MICRO.165.C15	MICRO.165.C15_873	NP_001053453	35.1	not assigned.no ontology	NOT VALIDATED NP_001053453: Os04g0543200 [Oryza sativa (japonica cultivar-group)]	AGGTACTGCTCGCACAACGACAAGGAGAACGTATGTTGATGATGATTATGAACAGCGGTA	8.1	8.3	7.9	7.7	6.4	6.8	1.1	0.00086	0.034
MICRO.17819.C1	MICRO.17819.C1_417	CAA11131	16.2	secondary metabolism.phenylpropanoids	NOT VALIDATED CAA11131: O-methyltransferase [Prunus dulcis]	AAGGTAATTTGCCACTAATAATAGAACCAGCTTTGTAGCGAATGTTCATTGTTCTCATGT	10.6	11.9	10.9	8.7	7.1	9.6	2.6	0.00089	0.034
MICRO.2534.C1	MICRO.2534.C1_1263	AAT39459	21.01	redox.thioredoxin	NOT VALIDATED AAT39459: protein disulfide isomerase [Ipomoea batatas]	AAGCGATGCTGATGTTCTCATTGCAAAAACTGGATGCACTGCAAATGATCTCCCTAAAGG	9.1	9.7	9.1	11.1	10.9	9.8	-1.3	0.00086	0.034
MICRO.2818.C1	MICRO.2818.C1_1866	NP_178407	35.2	not assigned.unknown	NOT VALIDATED NP_178407: unknown protein [Arabidopsis thaliana]	TTACAGATTCTTTTATATGCTCTAGTTGGTGTCTCAATTTGAGACTATAAGAAGGGATCC	6.3	6.3	6.8	7.4	8.3	6.9	-1.1	0.00087	0.034
MICRO.4372.C14	MICRO.4372.C14_159	NA	35.2	not assigned.unknown	NOT VALIDATED NA: NA	CATAAACACTTTTACTAAAGTGGTCTTTACAGGGTAACCCGGAGGTTCTTTCCATTGAAA	7.5	7	7.3	8	8.1	7.7	-0.7	0.00088	0.034
MICRO.491.C5	MICRO.491.C5_679	ABE87035	29.5.01	protein.degradation.subtilases	NOT VALIDATED ABE87035: Orn/DAP/Arg decarboxylase 2; Protease-associated PA; Proteinase inhibitor I9, subtilisin propeptide [Medicago truncatula]	AAGTTGGAAGTTGTATTTCAAATGTTTGATGGAAGACATGGAAAACTGTATGCATTCAGG	8.9	9.9	8.4	10.2	10.4	10	-1.1	0.00087	0.034
MICRO.6780.C1	MICRO.6780.C1_66	O82012	20.2.1	stress.abiotic.heat	NOT VALIDATED O82012: 17.6 kDa class I heat shock protein (Hsp20.0)	ATTAAAGCAAGTAAACACAAGAACAATTCTCAATAGCTCACTGAAAATGTCACTGATCCC	15.2	13.3	15.3	12.7	13.2	12.6	1.8	0.00086	0.034
MICRO.7173.C1	MICRO.7173.C1_1324	ABE80179	35.2	not assigned.unknown	NOT VALIDATED ABE80179: conserved hypothetical protein [Medicago truncatula]	GGAGCTCGTCAGTCTTGTACATATCTGGTGTCAGATGGATTGCTGGATTTTACATACAGT	12.8	11.8	12.7	11.2	11.6	11.5	1	0.0009	0.034
MICRO.817.C2	MICRO.817.C2_799	CAC84143	21.01	redox.thioredoxin	NOT VALIDATED CAC84143: thioredoxin peroxidase [Nicotiana tabacum]	GCAGCAAAGAATACTTTGCATCCATATAAAGGGATGAGATGATGGCTGCAATATCTCTAT	9.4	10.5	9.2	10.8	10.8	10.6	-1	0.00086	0.034
MICRO.8565.C1	MICRO.8565.C1_1931	BAD15365	12.1.02	N-metabolism.nitrate metabolism.nitrite reductase	NOT VALIDATED BAD15365: nitrite reductase [Nicotiana tabacum]	TCACACGGTGTATTCTTTTGGAAAAACTCATCCAAACCACAAGGCTTTTGAATTGTTGAA	9.1	9.3	10.1	8.3	8	7	1.7	0.00088	0.034
MICRO.8976.C1	MICRO.8976.C1_493	NP_201223	35.2	not assigned.unknown	NOT VALIDATED NP_201223: unknown protein [Arabidopsis thaliana]	TTCCGATGAATGAGTAAGAAGGATCTATGATGATTGTAATTACCATGTCATCTTGTACCA	10.1	10.5	10.2	10.9	10.9	11.3	-0.7	0.00085	0.034
MICRO.9462.C1	MICRO.9462.C1_217	AAM12785	35.2	not assigned.unknown	NOT VALIDATED AAM12785: unknown [Capsicum annuum]	ATTCACCCTATGGATGCTTCTTCCTACAACTTCTTCTAAATTTAGTGTCAGTTATAACCT	14.3	11.7	16	11.1	10.2	11.6	3	0.00087	0.034
MICRO.9671.C2	MICRO.9671.C2_809	NP_201244	27.4	RNA.RNA binding	NOT VALIDATED NP_201244: HEN4 (HUA ENHANCER 4); nucleic acid binding [Arabidopsis thaliana]	ACAAGCTTCTTTTCAGCTTCATCTTCTTGTATCAGCGCTCCGGGAATAGACTGACCAAGA	9.2	8.9	8.9	8.7	8.2	8.1	0.7	0.00089	0.034
MICRO.9846.C1	MICRO.9846.C1_561	ABB97039	30.5	signalling.G-proteins	NOT VALIDATED ABB97039: unknown [Brassica rapa]	CATCTAATGCTGCTGGCCTACTTGAGAAGTTGAGTGTCGAAGATAAGAAACCAGAGGAGA	11.8	11.3	12.1	11	11	10.3	1	0.00088	0.034
MICRO.9881.C1	MICRO.9881.C1_722	ABE77424	35.2	not assigned.unknown	NOT VALIDATED ABE77424: Zinc finger, TAZ-type; BTB/POZ [Medicago truncatula]	TCATCAGATTCTTGTATTCATCCAGGTATTGAGGAGAAAAAATCAGAAGCATGGGGTGAA	7.6	7.3	8.2	6.7	6.8	6.6	1	0.00089	0.034
POAC950TP	POAC950TP_324	AAA80678	30.5	signalling.G-proteins	NOT VALIDATED AAA80678: small GTP-binding protein	CAGGATGGGAAAACCATTAAACTTCAAATTATATGCAGTGGGATACTGCTGGTCAAGAAC	9.7	9.4	9.8	9	8.4	7.7	1.3	0.00088	0.034
POACI52TP	POACI52TP_790	ABA40431	35.1	not assigned.no ontology	NOT VALIDATED ABA40431: unknown [Solanum tuberosum]	TATATACGGTGGACGTCGGAACGAACGATTTTTATGTGTACTCCGGGGACCAAAACGTTA	12	10.5	13	9.7	9.3	9.8	2.2	0.0009	0.034
STMHK53TV	STMHK53TV_61	NP_181548	35.1	not assigned.no ontology	NOT VALIDATED NP_181548: transferase, transferring glycosyl groups [Arabidopsis thaliana]	TCCATGACTCAAATCTCATATGAGAAAGCTGTGGGGAATACCAGCTCGAATTAGGCGTGT	8.8	8.2	8.3	7.4	7.6	7.8	0.8	0.00086	0.034
STMIJ27TV	STMIJ27TV_502	NA	35.2	not assigned.unknown	NOT VALIDATED NA: NA	TCTCTTATGGGGTAACTATGTCAGTGTATGTAGGCTTCTCGTGTTGTTGTATTCGATATG	6.4	6.3	6.5	7.3	6.7	7.9	-0.9	0.00088	0.034
156AF.esd	156AF.esd_685	P00590	35.2	not assigned.unknown	NOT VALIDATED P00590: Cutinase-1 precursor (Cutin hydrolase 1)	AGTTCCTCATCGAGAAGGTTCGGGCTGTCCGTGGTTCTGCTTCTTCGACCCTCCCAAGAT	6.6	6.6	6.8	7.4	7.1	8.1	-0.8	0.00095	0.035
bf_arrayxxx_0005h12.t7m.scf	bf_arrayxxx_0005h12.t7m.scf_22	NA	21.01	redox.thioredoxin	NOT VALIDATED NA: NA	ATGTATGCCTGAGTCTTCGTACATAGTTCTGAACTTAGATCATAGATTGATACTGACAGC	8.9	10.2	8.8	10.5	10.7	10.4	-1.2	0.00095	0.035
BF_CSCHXXXX_0029D12.T3M.SCF	BF_CSCHXXXX_0029D12.T3M.SCF_586	NA	35.2	not assigned.unknown	NOT VALIDATED NA: NA	GCTATTCGTTGATGTGTGGCATTTAATAACCGATAACTTAGCACCCTGTAGAACAATTGA	8.4	8.8	7.9	9.1	9.3	9.4	-0.8	0.00092	0.035
bf_ivrootxx_0046g01.t3m.scf	bf_ivrootxx_0046g01.t3m.scf_410	NA	35.2	not assigned.unknown	NOT VALIDATED NA: NA	TTACCCATTAGATACCTAGGTGTTCCTCTTAGCACCAAAAAGTTATCTATTATGCGATGT	6.8	6.5	6.5	7.7	8.1	6.8	-0.9	0.00091	0.035
bf_mxflxxxx_0039b06.t3m.scf	bf_mxflxxxx_0039b06.t3m.scf_285	BAE99404	29.3.3	protein.targeting.chloroplast	NOT VALIDATED BAE99404: hypothetical protein [Arabidopsis thaliana]	CTGCCATCGCACAACTATGATTTTGAAGTAATCAAATCTCCCATTCCTCGAAAAGTTGAG	8.3	8.1	8.1	7.9	6.8	6.6	1.1	0.00092	0.035
MICRO.10180.C1	MICRO.10180.C1_824	BAD93478	1.01.05.04	PS.lightreaction.other electron carrier (ox/red).ferredoxin oxireductase	NOT VALIDATED BAD93478: phytochromobilin synthase [Solanum lycopersicum]	GCAGACCTTACCTAACTTGGTGAAGCATAGAGAGTCTGTTTCCGATACCCAATGTAAATC	8.5	8.6	9.2	7.5	7.4	8.4	1	0.00093	0.035
MICRO.11604.C1	MICRO.11604.C1_1307	NP_172158	35.2	not assigned.unknown	NOT VALIDATED NP_172158: kinase [Arabidopsis thaliana]	TGGATGTCAGATAGCAATATTTTTCTAGTTTAGGATGAGTAGAAGACACACGTCCATATT	7.7	7.6	7.8	7	7.3	6.9	0.6	0.00095	0.035
MICRO.13020.C4	MICRO.13020.C4_165	CAA63967	29.3.2	protein.targeting.mitochondria	NOT VALIDATED CAA63967: pom14 [Solanum tuberosum]	AAACGAAAAGTGTCGTGACAGAGGAGCATTTATTAGACACAAACATTGATAATGCATGTA	8.8	10.9	7.7	11.6	12.3	12.7	-3	0.00091	0.035
MICRO.13072.C1	MICRO.13072.C1_192	NA	35.2	not assigned.unknown	NOT VALIDATED NA: NA	CTGCAGCGTAACGTTAGTTCATGTGTTTCCGTTATAAATAGGAATCCTTGTTTAAGTCTT	6.8	6.9	7	8.2	7.3	9.1	-1.3	0.00091	0.035
MICRO.13911.C2	MICRO.13911.C2_364	ABC41690	35.2	not assigned.unknown	NOT VALIDATED ABC41690: unknown [Musa acuminata]	GTCCTGTTTCTCATGCTTTGCGAATATGTATACTTTGCTGTAAAGATATCAAGATATTGC	11	11.7	11.3	12.2	12.4	12.1	-0.9	0.00091	0.035
MICRO.15114.C1	MICRO.15114.C1_1488	AAK96769	35.2	not assigned.unknown	NOT VALIDATED AAK96769: Unknown protein [Arabidopsis thaliana]	CCCAAGTATTTCCGAACTTATACAGACGTTCATGCCAAGAGTAGCGGAATGATTTTCGGA	7	7.1	6.9	7.4	8	7.8	-0.7	0.00092	0.035
MICRO.15235.C3	MICRO.15235.C3_129	NP_001049703	35.2	not assigned.unknown	NOT VALIDATED NP_001049703: Os03g0274700 [Oryza sativa (japonica cultivar-group)]	GGCCACCAAACGATGCAACATCAACAGCAGCAGCAGATAAAGTCAGAACATCATCAACAA	8.5	8.1	8.2	7.4	6.9	7.1	1.1	0.00091	0.035
MICRO.16737.C1	MICRO.16737.C1_528	ABF06706	35.2	not assigned.unknown	NOT VALIDATED ABF06706: UP-9A [Nicotiana tabacum]	TATATATCGAGTAGGCCTAAGAAGGGTGAAACACTCGTTTTGCATTTTTCGGAGTTGAGT	9.1	12.1	9.5	12.4	12.8	14	-2.8	0.00093	0.035
MICRO.17030.C1	MICRO.17030.C1_354	AAM64550	35.2	not assigned.unknown	NOT VALIDATED AAM64550: unknown [Arabidopsis thaliana]	AAGACCTGCTTGTACATCTTGATTCACATGTTGTACCTTCAAAATGCTGGTTTTGTTATG	12.7	10.4	12.2	9.9	8.9	10	2.2	0.00093	0.035
MICRO.252.C4	MICRO.252.C4_581	XP_001032265	29.5.11.01	protein.degradation.ubiquitin.ubiquitin	NOT VALIDATED XP_001032265: Ubiquitin family protein [Tetrahymena thermophila SB210]	AACGCACCTTGGCGAATAAAATATTCAGAAGGGAGTTCACTCTTTGGAACCTTGTTTCCT	6.5	6.8	6.5	6.1	5.9	5.8	0.7	0.00091	0.035
MICRO.2830.C1	MICRO.2830.C1_1022	AAM29183	17.5.1	hormone metabolism.ethylene.synthesis-degradation	NOT VALIDATED AAM29183: ACC oxidase [Solanum tuberosum]	TTGGGTTGAAGTACAAGAGAAGCTGATGTATATAAGCTTCCTTTACCATGTAAGATTGCA	14.7	11.1	15.6	10.5	8.8	10.5	3.9	0.0009	0.035
MICRO.2856.C1	MICRO.2856.C1_769	AAB64346	17.6.1	hormone metabolism.gibberelin.synthesis-degradation	NOT VALIDATED AAB64346: gibberellin 7-oxidase [Cucurbita maxima]	GATGTCATTCAGGTGCTAAGCAACATAAATTCAAGAGTGCAACGCACAGGGTGATCAGAC	8.9	9.8	8.1	10.9	10.1	10.3	-1.5	0.00091	0.035
MICRO.3213.C1	MICRO.3213.C1_645	NA	35.2	not assigned.unknown	NOT VALIDATED NA: NA	TCTCAACTATGTTATGCACATTTTTTCGTTTGCCCTGTAGCATGTTAGTTTTTGGTATCA	7.6	7.4	7.2	6.7	6.8	6.6	0.7	0.00092	0.035
MICRO.3618.C1	MICRO.3618.C1_848	BAD43477	35.2	not assigned.unknown	NOT VALIDATED BAD43477: unnamed protein product [Arabidopsis thaliana]	TTTTGGAGGTGTATGAATGTGTCTTCCCTTAATATGATTCAAGGAGAAGCAACTCCAAAA	7	8.1	7.7	6.7	6.5	6.5	1	0.00094	0.035
MICRO.4497.C2	MICRO.4497.C2_1054	AAA81892	26.01	misc.misc2	NOT VALIDATED AAA81892: epoxide hydrolase	GCAGTGTTCGTTACTTGTCATATTATGACTCATAAAATAGTTCGAATTTGGAACGTTGTG	12.8	13.5	11.9	14	14	13.7	-1.1	0.00091	0.035
MICRO.460.C1	MICRO.460.C1_1256	ABE90930	35.2	not assigned.unknown	NOT VALIDATED ABE90930: LD18112p, putative [Medicago truncatula]	TGCCTGGGATACCAAATATGAACATTGGATCTCGCTGAATGTAAGCTTTGACGGCCCATT	6.3	6.2	6.5	7.1	6.9	6.9	-0.6	0.00091	0.035
MICRO.4624.C1	MICRO.4624.C1_1652	NP_188746	34.16	transport.ABC transporters and multidrug resistance systems	NOT VALIDATED NP_188746: ATPase, coupled to transmembrane movement of substances [Arabidopsis thaliana]	AAAGAGCCAGACAAATTGTTGTATCAATCGTCACATATATATACACAATAGAAGTGTCCC	7.2	8	7.3	6.5	6.7	6.8	0.9	0.00092	0.035
MICRO.6764.C1	MICRO.6764.C1_277	Q42429	27.3.24	RNA.regulation of transcription.MADS box transcription factor family	NOT VALIDATED Q42429: Agamous-like MADS-box protein AGL8 homolog (POTM1-1)	TTCATGCATGGAGAGGTTACTTGAAAGATATGAAAGATACTCATTTGCTGAGAGGCAGCT	11.5	10.7	12.5	9.9	10.1	10.2	1.5	0.00091	0.035
MICRO.7003.C1	MICRO.7003.C1_1168	NP_001047091	35.2	not assigned.unknown	NOT VALIDATED NP_001047091: Os02g0550000 [Oryza sativa (japonica cultivar-group)]	AACTAGCTCTTTAGTAGTGCAACTTTGTAACTTTATATGCCTTGTGCAAAATCTTGCTTG	9.6	9.8	8.7	10.3	10.3	10.2	-0.9	0.00094	0.035
MICRO.7442.C2	MICRO.7442.C2_886	NP_192735	35.2	not assigned.unknown	NOT VALIDATED NP_192735: unknown protein [Arabidopsis thaliana]	ATAAAGCAGGTTTATGGTGAATGTACATAGTACAGGCTCAGTTTATCAAATAGTATTGCC	9.2	9.7	9.4	10.2	10.4	9.8	-0.7	0.00093	0.035
MICRO.7728.C3	MICRO.7728.C3_2316	NP_189036	1.03.06	PS.calvin cyle.aldolase	NOT VALIDATED NP_189036: catalytic/ dihydroxy-acid dehydratase [Arabidopsis thaliana]	ATCTGAGATTGGTCACTAGCTAGGAGGTTTTTCAGACTTGCTCCAAGTTTATTGATCAAG	8.8	9.5	9.4	9.9	10.2	10.3	-0.9	0.00094	0.035
MICRO.851.C1	MICRO.851.C1_738	AAD46404	17.5.3	hormone metabolism.ethylene.induced-regulated-responsive-activated	NOT VALIDATED AAD46404: ethylene-responsive RNA helicase [Lycopersicon esculentum]	GAAAGGTAGGTGGTGATATGCTCAACGTGACTTTACTACTGTGTCGTGATGTTGATGGAT	10.2	8.2	9.2	7.9	7.7	7.3	1.6	0.00093	0.035
POAB291TF	POAB291TF_347	AAG42751	29.5.11.05	protein.degradation.ubiquitin.ubiquitin protease	NOT VALIDATED AAG42751: ubiquitin-specific protease 6 [Arabidopsis thaliana]	TTTTTTGGTACACTTTTACGTGGGGGGTAATTTTTTACATTTACCATTGAGTTGCCCTTG	6.3	6.1	6.2	7.1	7.3	6.5	-0.8	0.00093	0.035
POCB770TP	POCB770TP_704	NP_190606	35.2	not assigned.unknown	NOT VALIDATED NP_190606: unknown protein [Arabidopsis thaliana]	AGATATTATTGCTTCAGAGGCGCAAGGATCTGCTTATAAGGATGTGTCCACTGGATTTAC	7.5	7	7.4	6.6	5.8	6.8	0.9	0.00095	0.035
POCBO70TP	POCBO70TP_891	ABB89769	34.6	transport.sulphate	NOT VALIDATED ABB89769: At3g12520-like protein [Boechera stricta]	CTGGGTACAGCTTTTGTGAAAATCTATCATCCACCTTCAATTTCGTTGGTGGGAGATATA	7.2	7.2	7.4	6.6	6.3	6.5	0.8	0.00091	0.035
SDBN003D17u.scf	SDBN003D17u.scf_318	ABO64356	35.1	not assigned.no ontology	NOT VALIDATED ABO64356: unknown [Brassica juncea var. tumida]	TATTTGATGTCGATTCATCCACACTTCCATTCCTTGTAGAGGAAGGCTAACTGCTTGCTG	7.6	6.6	7.6	7.8	8.5	8.7	-1.1	0.00092	0.035
STMET82TV	STMET82TV_201	NP_001062411	35.2	not assigned.unknown	NOT VALIDATED NP_001062411: Os08g0545000 [Oryza sativa (japonica cultivar-group)]	TCTGTTGCTGCAAAAGACTTTCAAGTGTGATACTTCTTTCTTGTCAATGTAAAAGGAAAC	7.5	6.9	7.5	8	9.1	8.1	-1.1	0.0009	0.035
STMGW55TV	STMGW55TV_512	CAB08111	13.2.4.1	amino acid metabolism.degradation.branched-chain group.shared	NOT VALIDATED CAB08111: branched chain alpha-keto acid dehydrogenase E1-alpha subunit [Solanum lycopersicum]	TAGAGATGCAATCAACAAATATCCTAAAGACTACCCTACTGATTTTCATGTATAGCCTAG	7.7	7.5	7.2	6.8	6.7	6.9	0.7	0.00094	0.035
STMJJ62TV	STMJJ62TV_524	EAZ29007	35.2	not assigned.unknown	NOT VALIDATED EAZ29007: hypothetical protein OsJ_012490 [Oryza sativa (japonica cultivar-group)]	GATAGATTTGCAGATACACCATATGCAAGAGCTTCTAAGGGACGACATAAAGGAGGAAAA	9.6	8	9.9	7.6	7.3	7.7	1.6	0.00091	0.035
TBSK01365FB09.t3m.scf	TBSK01365FB09.t3m.scf_133	P20347	20.1.07.06	stress.biotic.PR-proteins.proteinase inhibitors	NOT VALIDATED P20347: Cysteine protease inhibitor 1 precursor (PCPI 8.3) (P340) (P34021)	TTGACCAAACTGTTTGGCACACGGTTAATGATGAACAGTTTGGTGGTAACCTGGTGCGTA	10.5	11.6	9.7	12.1	12.7	12	-1.7	0.00092	0.035
003F12AF.esd	003F12AF.esd_344	ABB86242	4.1	glycolysis.phosphoglycerate kinase	ABB86242: phosphoglycerate kinase-like [Solanum tuberosum]	ACATTGATTTCAATTGGGCCCAGAAAGTTGCACAAACTTGGTTGGCTGAACTACCGGGAA	9.9	9.1	9.6	9	8.3	7.2	1.4	0.001	0.036
bf_arrayxxx_0015h03.t7m.scf	bf_arrayxxx_0015h03.t7m.scf_771	P93111	19.2	tetrapyrrole synthesis.glu-tRNA reductase	NOT VALIDATED P93111: Glutamyl-tRNA reductase 1, chloroplast precursor (GluTR)	ACCCACCCCCACTCTTCTGTCAACACATTAATTTGTCTGTTCATTTAAGTTGTGTCCTTT	8.7	9.2	8.8	9.6	10.4	9.7	-1	0.00099	0.036
bf_arrayxxx_0034d05.t7m.scf	bf_arrayxxx_0034d05.t7m.scf_21	AAD01264	29.5.05	protein.degradation.serine protease	NOT VALIDATED AAD01264: glucose acyltransferase [Solanum berthaultii]	GAGATGCAATAACAGCATGAGATACAGCGCTCGTGAAAGTATGAATAGATCTGGGTCATA	10.6	12.2	9.9	13.2	13.4	12.8	-2.2	0.00098	0.036
bf_arrayxxx_0051c01.t7m.scf	bf_arrayxxx_0051c01.t7m.scf_594	EAZ07953	10.6.3	cell wall.degradation.pectate lyases and polygalacturonases	NOT VALIDATED EAZ07953: hypothetical protein OsI_029185 [Oryza sativa (indica cultivar-group)]	ACTATATTCGTCTCGAAGCTCCACCAAACCTAAGCAGTGTTTCAGATTTCCCTTTCTTGT	8	8.9	7.9	9.5	9.5	9.4	-1.2	0.00098	0.036
bf_arrayxxx_0084e10.t3m.scf	bf_arrayxxx_0084e10.t3m.scf_73	NA	35.1	not assigned.no ontology	NOT VALIDATED NA: NA	GTGGGTGCTGCTTGCACATGTGCACTTGAAATGATTGATGTGCTTGCTGGGGCCAAAAAA	6.7	6.7	7	7.7	7.8	7.6	-0.9	0.001	0.036
bf_arrayxxx_0105a09.t3m.scf	bf_arrayxxx_0105a09.t3m.scf_241	BAF00759	35.1	not assigned.no ontology	NOT VALIDATED BAF00759: hypothetical protein [Arabidopsis thaliana]	CCAATCCAAGGGATTCCTTGGTGCCTTATTCCGGGGCACATGAACTCTATTCCAAAAAAT	6.5	6.6	6.4	7	7.6	7	-0.7	0.00098	0.036
bf_ivrootxx_0031h03.t3m.scf	bf_ivrootxx_0031h03.t3m.scf_423	NA	35.2	not assigned.unknown	NOT VALIDATED NA: NA	CTTCCTAAGAGAACCATGGACAAACCTGTCCAAACAGTGGCTTTGGGTTTAAAGTTGAGG	7.5	7.9	7.4	6.8	6.8	6.8	0.8	0.00096	0.036
BF_LBCHXXXX_0049F02_T3M.SCF	BF_LBCHXXXX_0049F02_T3M.SCF_502	NA	35.2	not assigned.unknown	NOT VALIDATED NA: NA	AGCAACGTGGTGGTTGAGTGTCCTACGTGTCGGATCTGCTGTCTAGTAAGCACCACGGCT	6	6.4	6.5	6.6	8.1	7.4	-1	0.00097	0.036
bf_lbchxxxx_0062e04.t3m.scf	bf_lbchxxxx_0062e04.t3m.scf_335	NA	35.2	not assigned.unknown	NOT VALIDATED NA: NA	CGTGCAGGAAAGATGTTTAGGCTGCCTGACTGTGTTTCCCTAAGCTCTGCAGCAGTGCGT	6.2	6.7	6.3	7.1	7.2	7.1	-0.7	0.00099	0.036
bf_mxflxxxx_0053a04.t3m.scf	bf_mxflxxxx_0053a04.t3m.scf_285	ABC69409	26.1	misc.cytochrome P450	NOT VALIDATED ABC69409: CYP71AT2v2 [Nicotiana tabacum]	AAAGAGGACATTGACCACATATGTTAAGCCTGGAACCACCATGCATAGGAAAAATGATCC	7.8	7.4	7.4	8.3	8.3	8.7	-0.9	0.001	0.036
bf_mxlfxxxx_0002e03.t3m.scf	bf_mxlfxxxx_0002e03.t3m.scf_310	AAR99599	2.2.2.04	major CHO metabolism.degradation.starch.D enzyme	NOT VALIDATED AAR99599: 4-alpha-glucanotransferase; disproportionating enzyme [Solanum tuberosum]	GGTACTCTTTCGATTTTCTTCAAGTGTCGAAATTTGGTCAAAGATCAAGCCCTTTACTTG	11	11.6	11	12.3	12.3	11.7	-0.9	0.001	0.036
bf_mxlfxxxx_0070c04.t3m.scf	bf_mxlfxxxx_0070c04.t3m.scf_63	AAO13360	27.3.03	RNA.regulation of transcription.AP2/EREBP, APETALA2/Ethylene-responsive element binding protein family	NOT VALIDATED AAO13360: dehydration-responsive element binding protein 3 [Lycopersicon esculentum]	ATGTCAGAAAATTTCTTGTTGCAGAAGTATCCATCCTCATGAAAATTGATGGGGCCCTCC	10.8	10.9	10.9	9.9	9.7	10.1	1	0.00096	0.036
cSTA34H12TH	cSTA34H12TH_201	AAM29183	17.5.1	hormone metabolism.ethylene.synthesis-degradation	NOT VALIDATED AAM29183: ACC oxidase [Solanum tuberosum]	AGGTCTCTCAAAGGAACTTTGGTAAGTCACCAACACCACAGCATAAAGCTTCAACAATTC	13.5	9.6	12.9	9.7	7.2	7.6	3.9	0.00098	0.036
cSTB33G21TH	cSTB33G21TH_328	AAM12777	35.2	not assigned.unknown	NOT VALIDATED AAM12777: putative auxin-induced SAUR-like protein [Capsicum annuum]	GCACTAGTGTGGAGGAGACTAGTGCAAGTTAAAATGACATTTATAAACACTAAAAGAATC	7.1	7.5	7.1	6.5	6.7	6.8	0.6	0.00098	0.036
cSTS10P23TH	cSTS10P23TH_343	AAC49603	20.1.07.06	stress.biotic.PR-proteins.proteinase inhibitors	NOT VALIDATED AAC49603: wound-inducible proteinase inhibitor I	TTAGTGAAAATATTGACCTCTTAGTGAAAATGTAAAGTTCGGATGAATCTCCTTCTACCC	8.1	9.7	7.9	10.1	10.6	10	-1.7	0.00098	0.036
MICRO.11042.C1	MICRO.11042.C1_834	AAF09256	35.2	not assigned.unknown	NOT VALIDATED AAF09256: disease resistance protein BS2 [Capsicum chacoense]	TGATAAACGGATCAAATTTCAATCTAGCAATTTAGTGAGAAAATCTAAGCATGCTCCAGC	7.5	7.9	7.7	7.1	7.1	6.2	0.9	0.00099	0.036
MICRO.11488.C1	MICRO.11488.C1_552	ABO79011	35.2	not assigned.unknown	NOT VALIDATED ABO79011: hypothetical protein MtrDRAFT_AC131239g22v1 [Medicago truncatula]	TTACTTGACTACAAAGGTGGATCTGAAGCGGGTTCTGTGGATTCAACTGAACCCTTTGCT	7.1	7.9	7	8.3	8.3	8.9	-1.1	0.00096	0.036
MICRO.12184.C1	MICRO.12184.C1_986	AAF44719	4.09	glycolysis.glyceraldehyde 3-phosphate dehydrogenase	NOT VALIDATED AAF44719: glyceraldehyde-3-phosphate dehydrogenase [Achlya bisexualis]	CGTTGGTTGATTTGTTGATTTATATTTTGGTCAATGAATCCTAAGTTTTTGAAGCTGTTG	6.4	6.9	6.8	7.7	7.2	7.1	-0.7	0.00098	0.036
MICRO.126.C7	MICRO.126.C7_1355	AAM92008	4.09	glycolysis.glyceraldehyde 3-phosphate dehydrogenase	NOT VALIDATED AAM92008: glyceraldehyde 3-phosphate dehydrogenase [Solanum tuberosum]	TTTTAGTGTACCATATATCCCTACTACTATTTTCGTTGAGATGTCCTTTCTCATGCAAAC	9.5	8.1	9.8	8.2	7.9	7.2	1.4	0.001	0.036
MICRO.12651.C1	MICRO.12651.C1_58	NA	35.2	not assigned.unknown	NOT VALIDATED NA: NA	CGAAGGCCTTGACCCATTTCCAGCAGGTCGCAGGTGGTGCAAAAGTAGGCCAAAACCCAA	8.1	8.4	7.9	7.6	6.6	6.6	1.2	0.00096	0.036
MICRO.13840.C1	MICRO.13840.C1_702	Q9M4G4	4.02	glycolysis.PGM	NOT VALIDATED Q9M4G4: Phosphoglucomutase, cytoplasmic (Glucose phosphomutase) (PGM)	TATGAATGTTATGCGCCAATTTCTTCTTCGTTTACCTTTCATCTTGAATGACTTGTGTAG	8.5	9.2	8.6	9.7	9.9	9.4	-0.9	0.00098	0.036
MICRO.1398.C1	MICRO.1398.C1_1625	AAU03362	34.14	transport.unspecified cations	NOT VALIDATED AAU03362: putative anion:sodium symporter [Lycopersicon esculentum]	AACTGCCCATGGCATTGTAAGCCAGTTTTAGTGCTTGTAAGGCTTATTCCAAAAAAGAAA	10.5	11.5	9.9	12.1	12.1	11.5	-1.3	0.001	0.036
MICRO.1607.C3	MICRO.1607.C3_1009	CAC01711	26.07	misc.oxidases - copper, flavone etc.	NOT VALIDATED CAC01711: quinone oxidoreductase-like protein [Arabidopsis thaliana]	GCTAAGTTTGTACAAACCAAAAGTTGTATTGAGTTTTGTGGTTAGTGAACTTTGTGTTGC	9.7	10.2	9.7	10.5	10.7	10.6	-0.8	0.00098	0.036
MICRO.16167.C1	MICRO.16167.C1_661	NA	35.2	not assigned.unknown	NOT VALIDATED NA: NA	TGGTTCTCAGTGTCCAGCAACTTTACAGAGTTTTGTACTCTTTACTGGGATGACAAATAC	7.7	8.3	8	7.5	7	6.8	0.9	0.00098	0.036
MICRO.16181.C1	MICRO.16181.C1_1081	AAO27794	10.6.2	cell wall.degradation.mannan-xylose-arabinose-fucose	NOT VALIDATED AAO27794: glycosyl hydrolase [Gossypium hirsutum]	GAACGAGTCTGGAAATAAGAGCTCTAATGCTTGTTGAAAACAGCCCAGCTGTGCACCATA	8.2	8.8	8.2	9.5	9.4	9.5	-1.1	0.00097	0.036
MICRO.16657.C1	MICRO.16657.C1_515	ABE88527	35.2	not assigned.unknown	NOT VALIDATED ABE88527: hypothetical protein MtrDRAFT_AC146852g21v2 [Medicago truncatula]	AGGCTTCAATTTCTAATTCTGTAATATGCCTCAAAACATGCACGGTGAAAAGCTATTAGT	14	10.7	15.7	10.7	9.6	9.9	3.4	0.00099	0.036
MICRO.17406.C1	MICRO.17406.C1_736	NA	35.2	not assigned.unknown	NOT VALIDATED NA: NA	CGGACTTGCAGTTGCTATTGTTATCATCCCAGGGCTATCTGCAGATTTCTGCTTGGTTTT	6.2	6.2	6.4	6.8	7	7	-0.6	0.00096	0.036
MICRO.17607.C1	MICRO.17607.C1_302	NA	35.2	not assigned.unknown	NOT VALIDATED NA: NA	AGAAATAAAGTTACGTCTTTGCTATCAGCTATATCCTTTTGGCATGATAGAGAACTCCTC	9.6	9.1	9.9	8	8.9	7.4	1.4	0.00099	0.036
MICRO.303.C2	MICRO.303.C2_859	CAB10540	27.3.23	RNA.regulation of transcription.HSF,Heat-shock transcription factor family	NOT VALIDATED CAB10540: hypothetical protein [Arabidopsis thaliana]	TCTTCTATGCTAGTCGAAGGAGAATATGTTAATCGTATTCTCCATTTTGTTGTAGTGCTT	7.6	8.7	7.5	8.8	8.9	9.3	-1	0.00099	0.036
MICRO.3138.C1	MICRO.3138.C1_322	AAT09980	3.5	minor CHO metabolism.others	NOT VALIDATED AAT09980: cell wall apoplastic invertase [Vitis vinifera]	GATCCCAACATGTTGACATCTCCACTTTGAGTGCTTGGAGTTTAAACCAGGCACACATCA	7.9	9.2	7.8	9.6	9.4	9.7	-1.3	0.001	0.036
MICRO.3274.C3	MICRO.3274.C3_1	NA	35.2	not assigned.unknown	NOT VALIDATED NA: NA	TGTAGTGGTAAATCCAAGGGATGGGAATGTGTTGCCAATGCTTATTTTGATCAAGCTGTT	7.2	8.6	6.7	8.7	11.1	9.9	-2.4	0.00098	0.036
MICRO.4099.C1	MICRO.4099.C1_1741	AAB34987	20.2.1	stress.abiotic.heat	NOT VALIDATED AAB34987: calmodulin-binding heat-shock protein; CaMBP [Nicotiana tabacum]	TTTGTGCTATAGTTCCCTGTTAGAATCATTGTTCATTTGGGTTTTCTGATGCTATCCTCT	7.4	7.2	7.6	7.9	9	8	-0.9	0.001	0.036
MICRO.4438.C1	MICRO.4438.C1_1001	NP_196688	35.2	not assigned.unknown	NOT VALIDATED NP_196688: OCP3 (OVEREXPRESSOR OF CATIONIC PEROXIDASE 3) [Arabidopsis thaliana]	GGTCTGAAGAAGGGGTTCCTGCTCATCGACTTCCATACCAACCATCATCTATATCTGAAT	10.3	9.7	10.2	9.2	8.7	9.6	0.9	0.001	0.036
MICRO.49.C9	MICRO.49.C9_1255	ABA46757	31.4	cell. vesicle transport	NOT VALIDATED ABA46757: syntaxin-like protein [Solanum tuberosum]	GCTAGGTATGTTGCTGCTTTGTAATGACACTATTAACAGGTTTGTCAATAAGAAGTAAAG	9.8	10.2	9.3	10.8	10.7	10.5	-0.9	0.00096	0.036
MICRO.6640.C1	MICRO.6640.C1_802	CAA77867	28.1.3	DNA.synthesis/chromatin structure.histone	NOT VALIDATED CAA77867: H1 histone-like protein [Solanum lycopersicum]	GGGTTTGTTGAAGTTTGGTTAATGAACGCTCTGTGTCTCTGCAAATTAAGGCGTTGTTCT	15.8	15.5	15.8	14.9	15.1	14.8	0.8	0.00098	0.036
MICRO.7430.C1	MICRO.7430.C1_602	ABN05323	2.1.2.03	major CHO metabolism.synthesis.starch.starch branching	NOT VALIDATED ABN05323: putative starch branching enzyme [Populus trichocarpa]	AGTACCTCTGCCAAGTAGAAGTGCTCAAGTCTACAAGTTTGACCCGAATTCTAAGAGCAT	7.6	7.8	7.7	7.3	6.6	7	0.8	0.00098	0.036
MICRO.8901.C1	MICRO.8901.C1_847	AAF27100	28.1	DNA.synthesis/chromatin structure	NOT VALIDATED AAF27100: Putative phospatase 2A inhibitor [Arabidopsis thaliana]	TCATTGGGGTTTGGTGTCTGTAAAGATCTAAAAGATGAAAAATTACAGTGGTGACTATAC	9.8	10.7	9.6	10.9	11	11	-0.9	0.00096	0.036
MICRO.920.C2	MICRO.920.C2_1499	Q00775	2.1.2.02	major CHO metabolism.synthesis.starch.starch synthase	NOT VALIDATED Q00775: Granule-bound starch synthase 1, chloroplast precursor (Granule-bound starch synthase I) (GBSS-I)	GAGCAGAAAGGTTCAGATATTCTTGTTGCTGCAATTCACAAGTTCATCGGATTGGATGTT	12.8	13.6	12.2	14.2	14	14.3	-1.3	0.001	0.036
SDBN005G07u.scf	SDBN005G07u.scf_422	NA	35.2	not assigned.unknown	NOT VALIDATED NA: NA	GAAGGTTAGATCAGCTTGGGACTGAATTGGATCCTCTTAAGCTTTGATAGTTTTTTCAGT	7.2	6.7	6.6	7.4	8	7.7	-0.9	0.00097	0.036
SDBT002K03x.scf	SDBT002K03x.scf_4	CAA12387	20.2.1	stress.abiotic.heat	NOT VALIDATED CAA12387: Hsp20.1 protein [Solanum peruvianum]	CAAAATTGAAAACCAAGCAAGCAGACACAGAAATTTCTCAAAAAGCTCACTGAAAATGTC	8.7	7.4	10.5	7.4	6.6	6.8	2	0.001	0.036
TBSK03136FF04.t3m.scf	TBSK03136FF04.t3m.scf_260	NA	35.2	not assigned.unknown	NOT VALIDATED NA: NA	AACCGTTGTATCGCGATATCGTGGGAGCCATAATTTTTTCAGATTTTAAGGTCATATTCA	7.2	7.1	8	8.3	8.9	9.6	-1.5	0.00098	0.036
bf_cswbxxxx_0027a07.t3m.scf	bf_cswbxxxx_0027a07.t3m.scf_259	ABE86459	35.2	not assigned.unknown	NOT VALIDATED ABE86459: Chaperonin Cpn60/TCP-1; Phosphatidylinositol-4-phosphate 5-kinase; Zinc finger, FYVE/PHD-type [Medicago truncatula]	TATTTTGTGCAGGAATGTTGGGTAGTTGCTTTATCTTTATATATTTCACGATTTGCACCG	12	12.6	11.9	12.8	13.2	12.6	-0.8	0.0011	0.037
BF_LBCHXXXX_0008G09_T3M.SCF	BF_LBCHXXXX_0008G09_T3M.SCF_408	NA	35.2	not assigned.unknown	NOT VALIDATED NA: NA	TTGAAAGGGCTTTTGCCATTATTTTAAGTGGTACAACCACCTTTCAATTATATCTACTGG	6.3	6.8	6.6	7.6	7.5	6.9	-0.8	0.0011	0.037
BF_LBCHXXXX_0024D04_T3M.SCF	BF_LBCHXXXX_0024D04_T3M.SCF_544	NA	35.2	not assigned.unknown	NOT VALIDATED NA: NA	CACTCTGACAGCCTTTTAGATCTTTTATTCAGAAGAGTAGAACTGAACATTAACTTTAGG	6.8	6.8	6.8	7	7.9	7.7	-0.7	0.0011	0.037
BF_LBCHXXXX_0035A11_T3M.SCF	BF_LBCHXXXX_0035A11_T3M.SCF_357	NA	35.2	not assigned.unknown	NOT VALIDATED NA: NA	TGCTGACTTGTTGATTCTTGATTCTCATTATTGTTTGATCTGATTGCTTATGGATCATCC	7.4	7.5	7.7	7.3	6.7	6.7	0.7	0.0011	0.037
bf_suspxxxx_0028H10.t3m.scf	bf_suspxxxx_0028H10.t3m.scf_466	NP_563985	31.4	cell. vesicle transport	NOT VALIDATED NP_563985: GOS11 (GOLGI SNARE 11); SNARE binding [Arabidopsis thaliana]	GCATGCTTCATTGCTTGAAGATTTTAGAGAGTTCGACCGAACCAGGTTAGATCTGGAAGA	9.8	10.1	9.9	9.3	9.1	9.4	0.7	0.001	0.037
BF_TUBSXXXX_0014A05_T3M.SCF	BF_TUBSXXXX_0014A05_T3M.SCF_207	NA	35.2	not assigned.unknown	NOT VALIDATED NA: NA	GAGATTTGGAGAAAATGAAAAAAGAGTTTTTGTTCCTCAAACTGAAATTGGTCTAGCAGC	12.2	11.2	14	10.6	10.3	10.2	2.1	0.001	0.037
cPRO13I17TH	cPRO13I17TH_583	ABA81852	31.1	cell.organisation	NOT VALIDATED ABA81852: unknown [Solanum tuberosum]	TTTGTTCCCTAGGATGTTCTTATGGATTTGGTCGCACCATGGACCATATTATACCTGGTC	7.8	8.3	7.5	8.5	9	8.5	-0.8	0.0011	0.037
cPRO15A7TH	cPRO15A7TH_237	P56337	29.2.3	protein.synthesis.initiation	NOT VALIDATED P56337: Eukaryotic translation initiation factor 5A-5 (eIF-5A-5) (eIF-4D)	AAAGGACTTGGTCCTGCCATGGATGCCTGCCTTGGAAAAGAACCAAATTTGTGGAATCAA	6.8	6	6.4	7.3	7.5	6.9	-0.8	0.001	0.037
cPRO6I21TH	cPRO6I21TH_487	NA	35.2	not assigned.unknown	NOT VALIDATED NA: NA	ACCTGCAGAAGAAACATCTAATTATGAAAGATCAGGTGCTGGAAAAGCCTTATTCTTTGC	6.9	6.5	6.8	6.9	8	8.1	-0.9	0.001	0.037
cSTA11C1TH	cSTA11C1TH_365	T04533	29.5	protein.degradation	NOT VALIDATED T04533: hypothetical protein F28J12.30 - Arabidopsis thaliana	TGTAACCAATTACCATGTCATTGCTAAATTAGCTACTGATAACATCGGATTGCAGCGTTG	8	7.5	7.9	6.9	6.6	7.5	0.8	0.0011	0.037
cSTB41C9TH	cSTB41C9TH_349	NA	35.2	not assigned.unknown	NOT VALIDATED NA: NA	AATGAAGATTTTGCGTTTCCAAATCTCAATCCAAGGGCAGAGGTGTATAGGGTTTGAGCT	6.7	6.7	6.7	7.3	7.5	7.1	-0.6	0.0011	0.037
MICRO.12956.C1	MICRO.12956.C1_680	AAK21344	35.1	not assigned.no ontology	NOT VALIDATED AAK21344: unknown protein [Oryza sativa (japonica cultivar-group)]	GGGGAGAGACTTATCTAGAAGATCGTAGAAGATTAAGGCTAAGGCACGGTGATGCAAATG	5.8	6.5	5.8	6.5	7.1	6.8	-0.8	0.0011	0.037
MICRO.14054.C1	MICRO.14054.C1_816	ABE89077	3.5	minor CHO metabolism.others	NOT VALIDATED ABE89077: Three-deoxy-D-manno-octulosonic-acid transferase, N-terminal [Medicago truncatula]	CACCATCATTGTGCCTCGGCATCCTCAGCATGGAAAACAAATTGCTTTGGAATTGGAGAA	7.9	7.7	7.1	7	6.2	6.8	0.9	0.0011	0.037
MICRO.14966.C1	MICRO.14966.C1_1177	NA	35.2	not assigned.unknown	NOT VALIDATED NA: NA	TTCTACTCTTGTGACTCCTCAACTATTTCAGTAGCTAAATTATTTGGGATCCAGACAACC	8.7	8	8.5	7.9	6.9	7.4	1	0.0011	0.037
MICRO.15530.C1	MICRO.15530.C1_507	ABE83729	17.1.3	hormone metabolism.abscisic acid.induced-regulated-responsive-activated	NOT VALIDATED ABE83729: Basic-leucine zipper (bZIP) transcription factor [Medicago truncatula]	TATCAAATCCCCGCAATGCAACAGGTACCAGAACAGCAGCATCAACAACAACAGCAGAAT	7.7	7.8	8.1	7.1	6.4	6.8	1.1	0.0011	0.037
MICRO.16071.C1	MICRO.16071.C1_545	NP_564263	29.5.11.04.02	protein.degradation.ubiquitin.E3.RING	NOT VALIDATED NP_564263: protein binding / ubiquitin-protein ligase/ zinc ion binding [Arabidopsis thaliana]	CCTGAAGAAAATGGTGATTCGAAAAATCGAGGGAGGAGGAGAGAGATTTGGATGAGTTTT	12.4	11.9	13.6	11.6	11.3	10.7	1.4	0.001	0.037
MICRO.1751.C28	MICRO.1751.C28_21	Q41484	20.1.07.06	stress.biotic.PR-proteins.proteinase inhibitors	NOT VALIDATED Q41484: Serine protease inhibitor 5 precursor (gCDI-B1)	AGAAGGCTTCATTAGTGTAGAGGAGTCACAACAAGCAATACACAAATAAAATTAGTAGCT	10.5	10.9	10.1	11.9	11.6	12.1	-1.4	0.0011	0.037
MICRO.18009.C1	MICRO.18009.C1_833	NP_565011	17.2.2	hormone metabolism.auxin.signal transduction	NOT VALIDATED NP_565011: auxin:hydrogen symporter [Arabidopsis thaliana]	TGAAGGGTCTCTAAGTTCTGTACTTGATTACCTATTCCAACAAACTACTCATATGTAGTG	9.7	10.6	9.5	10.7	11.2	11	-1	0.0011	0.037
MICRO.2094.C2	MICRO.2094.C2_221	NA	35.2	not assigned.unknown	NOT VALIDATED NA: NA	ATAATTTCTTCTCTGAGGAGGTTGCTTATCTTGTTCACCCGAAATAAAAGACGAGGTGAG	11.4	13	10.3	13.5	13.9	13.1	-1.9	0.0011	0.037
MICRO.2286.C12	MICRO.2286.C12_957	NA	35.2	not assigned.unknown	NOT VALIDATED NA: NA	TTCTGATTATGACTAGCTTGAAATAAGCATACACCTTGTGCTAATGGATGGAATCGATTA	6.1	6.1	6.2	6.9	6.8	7.2	-0.8	0.001	0.037
MICRO.3014.C1	MICRO.3014.C1_1824	NP_199513	35.1.40	not assigned.no ontology.glycine rich proteins	NOT VALIDATED NP_199513: unknown protein [Arabidopsis thaliana]	GGAGAACATGATAGAGGTTTAGAAAGGTTTTTTCTCATTAGAGGGTTTTTCCTTGTAAAG	9.3	11	8.5	11.8	12.1	11.3	-2.1	0.0011	0.037
MICRO.3274.C2	MICRO.3274.C2_942	NA	35.2	not assigned.unknown	NOT VALIDATED NA: NA	AGAGCTAAGTGGAATTATAGTATGCACGGATTCTACCTCGTGAAGATGGAGAGGTTGTTT	7	9.3	6.5	9.9	11.7	10.6	-3.1	0.0011	0.037
MICRO.3775.C1	MICRO.3775.C1_1372	AAL60068	33.99	development.unspecified	NOT VALIDATED AAL60068: forever young oxidoreductase [Lycopersicon esculentum]	ATGAAGCCTGATGAAGGTCTGCCTACGTGTTTTCCGTTTCCTCATGTCCAAACCTTCTAT	9	9.7	8.9	10.2	10.1	9.8	-0.9	0.0011	0.037
MICRO.3904.C1	MICRO.3904.C1_979	NP_001046221	35.2	not assigned.unknown	NOT VALIDATED NP_001046221: Os02g0200800 [Oryza sativa (japonica cultivar-group)]	AGTTGAGTACTTTGCAGTTGCAGAAAACTTGGGACAATACTGGCTGCTGAAACTGTTCTG	10	11.1	9.9	11.3	11.3	11.3	-1	0.001	0.037
MICRO.4226.C1	MICRO.4226.C1_1363	NP_001053395	12.4	N-metabolism.misc	NOT VALIDATED NP_001053395: Os04g0531300 [Oryza sativa (japonica cultivar-group)]	AGTGGGTTACCTTACCCCATTGAAGTTTTTGCTTTATTTCCGTGGTTCATGTTGCAGACA	8.9	8	9.2	7.5	8.1	6.8	1.3	0.001	0.037
MICRO.4921.C1	MICRO.4921.C1_434	BAA93453	35.1	not assigned.no ontology	NOT VALIDATED BAA93453: acyltransferase homolog [Petunia x hybrida]	CTTGTAACAAAATCTTGAATTTGGAAGGGCTTCATAGGCCTCTTCTCGCCGTTCAGCTCA	7.3	8	7.8	6.8	6.8	6.5	1	0.001	0.037
MICRO.5280.C2	MICRO.5280.C2_945	NP_200685	35.1	not assigned.no ontology	NOT VALIDATED NP_200685: dehydrodolichyl diphosphate synthase [Arabidopsis thaliana]	AGGCTATGGGTTCACGTGAACCCTGAACCCATGCTCCTTTCCCTAAACCATATATAGAAA	10.2	8.9	9.7	8.3	6.7	8.6	1.7	0.001	0.037
MICRO.5626.C1	MICRO.5626.C1_1767	P51819	20.2.1	stress.abiotic.heat	NOT VALIDATED P51819: Heat shock protein 83	TAAGGAGTGTCAATCTGTTTTGTGATATGCTAATCCCTTCGTTGGATAATTGTTTAATCC	12.1	9	14.5	8.8	8.8	6.9	3.7	0.0011	0.037
MICRO.6894.C1	MICRO.6894.C1_424	AAM67200	35.1	not assigned.no ontology	NOT VALIDATED AAM67200: spore coat protein-like protein [Arabidopsis thaliana]	TATCATTGCCATATTCTTGATCATGAAGATAATGTCATGATGAGGCCTCTAAAGTTTGTC	9.7	8.5	9.5	7.8	7.4	7.8	1.6	0.001	0.037
MICRO.7245.C1	MICRO.7245.C1_1648	NP_201208	20.2.3	stress.abiotic.drought/salt	NOT VALIDATED NP_201208: unknown protein [Arabidopsis thaliana]	AACAGGCCAATACTCCCTGTACTTTGTTTCGTTGAGGAATGTTTGCTTAATTAGGCTTCA	9.5	8.7	10.5	6.9	8.9	6.5	2.1	0.001	0.037
MICRO.7400.C1	MICRO.7400.C1_877	NP_177565	20.2.1	stress.abiotic.heat	NOT VALIDATED NP_177565: heat shock protein binding / nucleic acid binding / unfolded protein binding / zinc ion binding [Arabidopsis thaliana]	TGGTTCGAAGAAAGTCAAGAAGCGAGAAACAGTGGAAAAATCACGAGCAGTCCAAAAGCT	7.9	7.9	7.3	6.9	6.6	6.6	1	0.0011	0.037
MICRO.7426.C1	MICRO.7426.C1_2239	ABE93295	35.1	not assigned.no ontology	NOT VALIDATED ABE93295: Leucine-rich repeat; Leucine-rich repeat, ribonuclease inhibitor subtype; Leucine-rich repeat, cysteine-containing subtype [Medicago truncatula]	CTGTTTGCAGTTGGTTCAACACTGTTATGTCCATATAGTGTGCATATTATATAAGCAGGC	14.9	12.3	15.2	12.6	11.9	11.9	2	0.001	0.037
MICRO.7458.C1	MICRO.7458.C1_778	ABE91243	17.1.3	hormone metabolism.abscisic acid.induced-regulated-responsive-activated	NOT VALIDATED ABE91243: AtHVA22a, 65476-64429 [imported] - Arabidopsis thaliana [Medicago truncatula]	CTGATGTTGTAAAGAGGTTACATGAAACTGATGTTTGGTCTTTCTCCGTGTGGACTACTA	10.9	11.1	10.8	11.3	11.7	11.7	-0.6	0.001	0.037
MICRO.7716.C1	MICRO.7716.C1_1823	NP_001055160	31.4	cell. vesicle transport	NOT VALIDATED NP_001055160: Os05g0311000 [Oryza sativa (japonica cultivar-group)]	CATGGTCAGGCTGAGAGATATAGTAAGGACGTTAAATTCTTGTGCATTTCATAGTTTAAA	10	10.4	10.1	11	11	10.8	-0.8	0.001	0.037
MICRO.839.C5	MICRO.839.C5_53	AAF15901	20.1.07.06	stress.biotic.PR-proteins.proteinase inhibitors	NOT VALIDATED AAF15901: putative proteinase inhibitor [Nicotiana glutinosa]	GGTTGTCTTTTCTCAATCTTTCACTTGTGATAATAATGGGAATGTTGTACCCCCTCCTGT	9.2	10.1	7.9	10.6	11.5	11.1	-2	0.0011	0.037
MICRO.9360.C1	MICRO.9360.C1_670	ABE93078	30.11	signalling.light	NOT VALIDATED ABE93078: BTB/POZ; NPH3 [Medicago truncatula]	TTTGGTCTTTCTGTATTCTCTGTTTCATGAGAAGTATGATTTGGTTTTGGAGAGTGAAGT	6.2	6.7	6.8	6.9	7.6	7.6	-0.8	0.0011	0.037
MICRO.9905.C1	MICRO.9905.C1_718	NP_564831	35.2	not assigned.unknown	NOT VALIDATED NP_564831: unknown protein [Arabidopsis thaliana]	GCTTTAACTGTCCCATCCTGATGCATCATTAGAGAAAGATTGTTGTATAGATTGCATCAA	8	8.7	7.7	9.2	9.3	8.7	-0.9	0.0011	0.037
MICRO.9950.C1	MICRO.9950.C1_712	NP_196856	29.5	protein.degradation	NOT VALIDATED NP_196856: membrane alanyl aminopeptidase [Arabidopsis thaliana]	AAGAAAACTTGTACTCACAGATTATACGATATCAGTAAGGAACCCAGTGAGTGCTGTCTG	7	6.8	6.9	7.1	8	8.1	-0.8	0.001	0.037
POCCE47TP	POCCE47TP_774	AAM61280	27.4	RNA.RNA binding	NOT VALIDATED AAM61280: RNA binding protein-like [Arabidopsis thaliana]	CCCACATCAATTCCTCCTACTGCAGGTACAATTATTATGATGAAAAGGATGATAAGAAAG	9.3	8.3	10.1	8.5	7.4	7	1.6	0.001	0.037
SDBN005M17u.scf	SDBN005M17u.scf_745	CAC87837	29.5.11.04.03.03	protein.degradation.ubiquitin.E3.SCF.cullin	NOT VALIDATED CAC87837: cullin 1C [Nicotiana tabacum]	ATAGATTCCTACGAGGCATGGCTGCCAAACTGCCTTTACAAAGCTGTCCCACAATTTCTA	8.6	8.1	8.7	8.2	6.9	7.4	1	0.0011	0.037
SSBN003M02u.scf	SSBN003M02u.scf_538	AAF20285	35.2	not assigned.unknown	NOT VALIDATED AAF20285: transposase [Acinetobacter calcoaceticus]	GAAGCAGGATTCTCATTACCTACAATCCGAGTTATTCGTACGTTGAATCAGTTGCTGGAG	6.5	6.5	6.3	6.9	8.2	7.3	-1	0.0011	0.037
STMGP87TV	STMGP87TV_543	NP_001057478	35.2	not assigned.unknown	NOT VALIDATED NP_001057478: Os06g0309000 [Oryza sativa (japonica cultivar-group)]	TAGTGGGCTCATTGTCCATTGAGTTTTGAATTGTGCGCGCTGATTGGTCCTCGAGATTTT	9.2	8.3	9.2	8.4	7.8	7	1.2	0.001	0.037
STMHO87TV	STMHO87TV_507	NA	35.2	not assigned.unknown	NOT VALIDATED NA: NA	TTCCTTTAAACTTCTCAATCACCATGGCCCCACTCGGATTTAGACACAGAGACGGATTCA	7.9	7.9	8.7	6.1	7.6	6.7	1.4	0.001	0.037
ACDA04190F02.T3m.scf	ACDA04190F02.T3m.scf_184	NA	35.2	not assigned.unknown	NOT VALIDATED NA: NA	CCCATTATTAGTTCAATGAGCACGAATCCGGTGGCTCATACCAATTCAAGCTATGGTGTT	8.7	8.6	8.5	8.1	7.1	7.6	1	0.0012	0.038
bf_acdcxxxx_0004g12.t3m.scf	bf_acdcxxxx_0004g12.t3m.scf_424	NA	35.2	not assigned.unknown	NOT VALIDATED NA: NA	GGATATGCCCTAATACTCTGTAATACTCTGTAGCTAAATAGCTTTGTAGAATGATATGGT	8.2	7.4	8.5	7.4	6.5	6.9	1.1	0.0011	0.038
bf_arrayxxx_0038e04.t7m.scf	bf_arrayxxx_0038e04.t7m.scf_629	NP_188123	35.2	not assigned.unknown	NOT VALIDATED NP_188123: calmodulin binding [Arabidopsis thaliana]	TCATAGGTTCAGAGCTCAGAATATTCAAGTTTGAATGTTCCTTCTTATTGTGTTTGTTGC	9.4	9.4	9.9	10.1	10.4	10.4	-0.7	0.0011	0.038
bf_arrayxxx_0045g06.t7m.scf	bf_arrayxxx_0045g06.t7m.scf_558	NA	35.2	not assigned.unknown	NOT VALIDATED NA: NA	TGCCTCTCAAACCCCTCTATACATTAGTCTGTACTGATTAGTGAACTGCAAGTGTAAAAG	8.7	9	9	8.6	7.5	6.6	1.3	0.0012	0.038
bf_arrayxxx_0053e02.t7m.scf	bf_arrayxxx_0053e02.t7m.scf_75	NA	20.1.07.06	stress.biotic.PR-proteins.proteinase inhibitors	NOT VALIDATED NA: NA	CTATTATGTGGGATCAAAGTTGTGTGTTATGTTAATTACTAGTTATCTGAATGAAAGAGA	11.9	13	11.6	13.7	13.9	13.5	-1.5	0.0011	0.038
BF_CSCHXXXX_0030H06.T3M.SCF	BF_CSCHXXXX_0030H06.T3M.SCF_700	NA	35.2	not assigned.unknown	NOT VALIDATED NA: NA	TATGGCTGTATCCCCTTGCCATAAATAATGTCTTACACTGCTTGATTGTCGTACTGTTGA	6.9	7.7	7.3	6.9	6.3	6.3	0.8	0.0011	0.038
BF_LBCHXXXX_0053H02_T3M.SCF	BF_LBCHXXXX_0053H02_T3M.SCF_371	NA	35.2	not assigned.unknown	NOT VALIDATED NA: NA	ACGATTTGTTCAGTACCATATCCCATAATTTGTTCATTGGTCTATATTTCTGTGATTGGC	7.9	7	7.6	9.4	8.7	8.2	-1.3	0.0011	0.038
bf_mxflxxxx_0009d12.t3m.scf	bf_mxflxxxx_0009d12.t3m.scf_231	NA	35.2	not assigned.unknown	NOT VALIDATED NA: NA	GTATATATGGTGCATCATGCATGTTTGAAGTGTTATGTGTTAGAACCTCAAATGCTTACT	6.2	6.6	6.6	6.9	7.3	7.1	-0.6	0.0011	0.038
bf_mxlfxxxx_0015h03.t3m.scf	bf_mxlfxxxx_0015h03.t3m.scf_339	NA	35.2	not assigned.unknown	NOT VALIDATED NA: NA	CCTGTTTAAAAAGTCATATGCATACGTCATGTAACAAAAAATGGAGGTAAACGAAGTCAG	7.1	6.8	6.9	7.8	7.2	8.3	-0.8	0.0011	0.038
bf_mxlfxxxx_0064d12.t3m.scf	bf_mxlfxxxx_0064d12.t3m.scf_487	NP_177893	20.1.07	stress.biotic.PR-proteins	NOT VALIDATED NP_177893: unknown protein [Arabidopsis thaliana]	GAAATTGCAGTGTTGCTGGTTGTAATGGAGATTTAAGACAAAATTGCCCTTCTGAACTTG	8.3	7.6	9.1	7.6	6.7	6.8	1.3	0.0011	0.038
bf_suspxxxx_0012d12.t3m.scf	bf_suspxxxx_0012d12.t3m.scf_655	ABE92881	26.16	misc.myrosinases-lectin-jacalin	NOT VALIDATED ABE92881: Protein kinase; Heat shock protein Hsp20; Concanavalin A-like lectin/glucanase [Medicago truncatula]	AGAATGGGTCACTTTTGGCTTCTCAGGTGCAACAGGATCCCTCTTTGCATTACAAACCAT	6.2	6.5	6.4	7.1	6.9	7.6	-0.8	0.0011	0.038
bf_suspxxxx_0029g12.t3m.scf	bf_suspxxxx_0029g12.t3m.scf_357	NA	35.2	not assigned.unknown	NOT VALIDATED NA: NA	AATGAAGGATGCGTCCAAATAGTTTGTCTTTCAAGAACCAGTTATTTGGAAACACGTGTA	8.2	8.3	7.9	8.6	8.8	9.5	-0.8	0.0012	0.038
BF_TUBSXXXX_0044G01_T3M.SCF	BF_TUBSXXXX_0044G01_T3M.SCF_11	NA	29.4	protein.postranslational modification	NOT VALIDATED NA: NA	GCTTAAGCTGCAGAAACAGAGATCTTGACGAATTTTCAAAATGCCGTTTCAGATGCTGCA	11.6	11	11.6	10.5	10.4	10.8	0.8	0.0011	0.038
cPRO4A15TH	cPRO4A15TH_227	NP_181819	13.1.7	amino acid metabolism.synthesis.histidine	NOT VALIDATED NP_181819: ribose phosphate diphosphokinase [Arabidopsis thaliana]	GAATTTTTCCCAATTGGTCATGGGAAGGGTTTTTTCCCCAGGAAGATGGCTTCGAGGAAA	6.7	6.5	6.7	6.9	7.8	7.5	-0.8	0.0011	0.038
cSTS29H18TH	cSTS29H18TH_96	NA	20.1.02	stress.biotic.receptors	NOT VALIDATED NA: NA	TTTCAGGAGATTTGACCTTATCGACTACACTCCCTTCTCCTTCATTTTTACCCCCCAAAC	9.4	9	9.4	8.5	8.3	8.7	0.8	0.0012	0.038
MICRO.10130.C2	MICRO.10130.C2_550	CAC87643	35.1	not assigned.no ontology	NOT VALIDATED CAC87643: alcohol oxidase [Arabidopsis thaliana]	AGAAGATAGCAGAGATGATAAAAGATGGAAGGTTCTCAAGATAAGCCATACTCAGCTACT	11.9	10.4	12.3	9.7	10.4	10	1.5	0.0012	0.038
MICRO.1081.C51	MICRO.1081.C51_911	AAM66973	35.1	not assigned.no ontology	NOT VALIDATED AAM66973: unknown [Arabidopsis thaliana]	TTATATACTTGAATGAAAAGCTAATTAATGGGTTGCGAATATAGTGGCTGTTTGCCACTG	7.8	8.9	7.8	9.4	9.7	8.8	-1.1	0.0011	0.038
MICRO.10860.C1	MICRO.10860.C1_444	NA	35.2	not assigned.unknown	NOT VALIDATED NA: NA	ATTGAGATGTGCATACATGTATAATACATTGATACACAATGTCTCTTAGGGAAATGTGGC	7.6	7.7	7.7	8.1	8.6	8.5	-0.8	0.0011	0.038
MICRO.11573.C1	MICRO.11573.C1_698	CAB08111	13.2.4.1	amino acid metabolism.degradation.branched-chain group.shared	NOT VALIDATED CAB08111: branched chain alpha-keto acid dehydrogenase E1-alpha subunit [Solanum lycopersicum]	TAAACTCAAAATCCCAAACTCTGTTTCTGAATAGCTAGCTAGAATGCAACTCTGAAATTG	7.9	8.6	7.9	9.2	9.6	8.6	-1	0.0011	0.038
MICRO.11752.C3	MICRO.11752.C3_919	AAF74563	35.2	not assigned.unknown	NOT VALIDATED AAF74563: heat stress transcription factor A3 [Lycopersicon peruvianum]	TCTTTTGAGAAATTGGGACTAGAATGAGTGTATGACATTGCTCGCTCAAGCTTTTTCCAG	7.7	8.1	7.4	6.7	6.7	7	1	0.0011	0.038
MICRO.12052.C1	MICRO.12052.C1_1068	NA	35.2	not assigned.unknown	NOT VALIDATED NA: NA	CAAACCACTCCAATTTCAGCAGGAATTGCTCATGCATCAGCTGCTATGACGAACTATTCC	7.8	7.1	7.4	6.6	6.4	6.8	0.8	0.0012	0.038
MICRO.12186.C1	MICRO.12186.C1_1789	NP_173116	35.2	not assigned.unknown	NOT VALIDATED NP_173116: oxidoreductase [Arabidopsis thaliana]	AGAAGGTATTGGTGTGAGACTTATCAAGATCTTTTTGACTAAGCGGAATACTTTCTCTGT	8.1	8.3	8.6	9.9	9.2	9.1	-1.1	0.0012	0.038
MICRO.122.C3	MICRO.122.C3_1932	NP_566976	4.13	glycolysis.PK	NOT VALIDATED NP_566976: pyruvate kinase [Arabidopsis thaliana]	CGGTGCTCAGTAGTTCTTCCAACTGCTTTTTCTAATGCACTGTGTTATAGAGATGTCTGT	13.1	11.8	14.3	11.5	11.2	11.1	1.8	0.0011	0.038
MICRO.12744.C1	MICRO.12744.C1_654	ABD32200	35.2	not assigned.unknown	NOT VALIDATED ABD32200: hypothetical protein MtrDRAFT_AC148343g24v2 [Medicago truncatula]	AATCCTCCAATCTGTTGTACATATTGTATATCATACTACGGCCTCTATTGTGCAATTTAG	9.3	9.7	9.6	10.3	10.6	10.2	-0.8	0.0011	0.038
MICRO.13693.C1	MICRO.13693.C1_452	NP_001053782	35.2	not assigned.unknown	NOT VALIDATED NP_001053782: Os04g0603400 [Oryza sativa (japonica cultivar-group)]	TTACTTATATTTCTCAAGCCCCTGGGTAGATATGGGGACTTTCATGGCAACATTATCAGT	8.4	9.9	8.5	10.7	10.6	10.6	-1.7	0.0012	0.038
MICRO.13732.C2	MICRO.13732.C2_147	NP_565788	27.3.53	RNA.regulation of transcription.High mobility group (HMG) family	NOT VALIDATED NP_565788: transcription factor [Arabidopsis thaliana]	TAGAGTGAAGCAGAGCAAACCCACATCAGCCAACAAACTTAGCGCCATTTCGAACAAGAA	8.8	8.7	9.1	7.8	8.4	8.3	0.7	0.0011	0.038
MICRO.14648.C1	MICRO.14648.C1_1359	NP_568783	29.4	protein.postranslational modification	NOT VALIDATED NP_568783: TAP46 (2A PHOSPHATASE ASSOCIATED PROTEIN OF 46 KD) [Arabidopsis thaliana]	AACCTTTTTTAGCACCTAATTTATAACTCAATTGACATGCTACACCAGTTTGCCATTCAG	12.7	11.6	12.8	11.4	11.6	11.3	0.9	0.0011	0.038
MICRO.15268.C1	MICRO.15268.C1_322	AAL67830	35.2	not assigned.unknown	NOT VALIDATED AAL67830: Kunitz-type enzyme inhibitor S9C11 [Solanum tuberosum]	CACCCGTAAAGTTCATTCTTAATGATGATGATTTGGTACTGCGTGAAATGTATGCCATAC	12.7	14.3	11.2	15.1	15.1	15.1	-2.4	0.0012	0.038
MICRO.15447.C1	MICRO.15447.C1_1209	BAB02784	2.2.2.01	major CHO metabolism.degradation.starch.starch cleavage	NOT VALIDATED BAB02784: alpha glucosidase-like protein [Arabidopsis thaliana]	ATGACTTAGACGTCATACTCACCTTCCTCCAGCTTATTATTGACAGTCCGTTCAGGGTTT	8.9	10.2	8.6	10.7	11.2	10.4	-1.6	0.0011	0.038
MICRO.1563.C1	MICRO.1563.C1_503	NP_196186	29.3.4.99	protein.targeting.secretory pathway.unspecified	NOT VALIDATED NP_196186: signal recognition particle binding [Arabidopsis thaliana]	GTAAACGATTCATTGCGCCCCTTGATGATGAATCTAAGTTCGCTTGTTCAAGCGTACAAC	8.6	8.4	8.4	8	7.2	7.4	1	0.0012	0.038
MICRO.15986.C1	MICRO.15986.C1_1187	NP_188891	35.2	not assigned.unknown	NOT VALIDATED NP_188891: unknown protein [Arabidopsis thaliana]	CCTATGTAGAACTCTTTCAGTGTGATGTTTCTGCTGTTTTAATAAGATATGTTTAGGAGG	8.8	9.4	8.3	9.8	9.8	9.9	-1	0.0011	0.038
MICRO.16530.C1	MICRO.16530.C1_671	ABE92607	35.2	not assigned.unknown	NOT VALIDATED ABE92607: Agenet [Medicago truncatula]	TTTGGAGGCATTGTATGCTTCTGGTCCCTTGAGTTGGGAAACAGAAGCGTTACTGACAAA	7.5	7.8	7.5	6.8	6.6	7.2	0.7	0.0011	0.038
MICRO.16564.C1	MICRO.16564.C1_538	BAF49308	26.02	misc.UDP glucosyl and glucoronyl transferases	NOT VALIDATED BAF49308: putative glycosyltransferase [Eustoma grandiflorum]	CTTTTGGTATCGTAACCATGTAAATTTGTTATATGTGGTGCGAGGTCAATTGAGCGAACT	8.4	7.9	10.6	6.8	7.2	7	1.9	0.0011	0.038
MICRO.1925.C2	MICRO.1925.C2_516	NA	35.1	not assigned.no ontology	NOT VALIDATED NA: NA	AAGATGGCTGGAATTAGACAATATCTCTAAAAAGCTCCAAACAGAAGTACATCCGCGTCT	11.9	11.5	12.1	11.1	10.6	11.4	0.8	0.0011	0.038
MICRO.2069.C2	MICRO.2069.C2_648	BAE71216	10.1.06	cell wall.precursor synthesis.GAE	NOT VALIDATED BAE71216: putative NAD dependent epimerase [Trifolium pratense]	AATCCACTATCGTATGTCCAATCAACATTGCAGGGTTTGTCAACTTATTAGAGACGGTCA	6.6	6.5	6.7	7	8.3	7.3	-0.9	0.0012	0.038
MICRO.2340.C1	MICRO.2340.C1_897	CAA65127	11.9.3	lipid metabolism.lipid degradation.lysophospholipases	NOT VALIDATED CAA65127: phosphoinositide-specific phospholipase C [Nicotiana rustica]	CAACCCCTGTGGAATTAATAAGATGTCTCAAGTCAATAAAAGACATGCATTTTCTGCTTC	8.3	7.4	7.5	6.6	7	6.4	1.1	0.0012	0.038
MICRO.2462.C1	MICRO.2462.C1_369	NP_180427	35.2	not assigned.unknown	NOT VALIDATED NP_180427: unknown protein [Arabidopsis thaliana]	AGAGTTCCACATGCATGCTCCATCTAAGTTCTTAATTCTCTGTTTGAAAACCATTCAGGA	8.9	8.7	9	8.4	7.5	7.5	1.1	0.0011	0.038
MICRO.2894.C1	MICRO.2894.C1_1115	ABF47216	29.5.03	protein.degradation.cysteine protease	NOT VALIDATED ABF47216: cathepsin B [Nicotiana benthamiana]	GGATTCAAGTTTCTGAAGACTTGGGGGAATAATAACATTTTAAGTTTCATATTCTTCCCC	14.8	14.6	14.1	13.8	13.8	13.7	0.7	0.0011	0.038
MICRO.3025.C1	MICRO.3025.C1_2356	NP_001067112	35.1	not assigned.no ontology	NOT VALIDATED NP_001067112: Os12g0577000 [Oryza sativa (japonica cultivar-group)]	GTAACATAATGATGCGTATTTGTTCTTCCACATTTGTAAAATAGTACTAGCTGTTGGCAG	10.2	11.1	10.4	11.7	11.7	11.7	-1.1	0.0011	0.038
MICRO.3261.C1	MICRO.3261.C1_870	NP_030664	34.3	transport.amino acids	NOT VALIDATED NP_030664: amino acid permease [Arabidopsis thaliana]	ATCTTCACTGAACTTGGGAGGCCTTAAACTTGATTCAATTCACTTCTTTGGGGATTCTGG	8.3	8.4	7.9	9.5	9.7	9.3	-1.3	0.0012	0.038
MICRO.3438.C1	MICRO.3438.C1_1059	NP_195365	17.8.1	hormone metabolism.salicylic acid.synthesis-degradation	NOT VALIDATED NP_195365: S-adenosylmethionine-dependent methyltransferase [Arabidopsis thaliana]	AGGTTAGTGGATGAAGAAATGGCCAAAGAGGAAATTAGGCCTATCACTTTCCTTCTCGTT	9.8	9.6	11.9	8.3	8.4	8.8	1.9	0.0011	0.038
MICRO.3868.C1	MICRO.3868.C1_1522	NP_565950	35.1	not assigned.no ontology	NOT VALIDATED NP_565950: GPT (UDP-GLCNAC:DOLICHOL PHOSPHATE GLCNAC-1-P TRANSFERASE); UDP-N-acetylglucosamine-dolichyl-phosphate N-acetylglucosaminephosphotransferase [Arabidopsis thaliana]	AACTGCATTAGCACATGTTGTACTTAGCTTTCTTTGTACGATTTTGATGTTGGGAGACGC	10.2	10.7	10.1	11	11	11	-0.7	0.0011	0.038
MICRO.4066.C1	MICRO.4066.C1_1165	CAC09580	29.4	protein.postranslational modification	NOT VALIDATED CAC09580: protein kinase (PK) [Fagus sylvatica]	ATACAATTGATCTTTCTAAAGCTGTTTCTTGGGCTAAGATTTGCACACGGGTGCCACACA	9.5	8.3	8.9	8.2	6.7	7.5	1.4	0.0011	0.038
MICRO.4089.C1	MICRO.4089.C1_927	NP_001068335	35.1	not assigned.no ontology	NOT VALIDATED NP_001068335: Os11g0637700 [Oryza sativa (japonica cultivar-group)]	CAATCTTCATTGGTCGCAATGGATACTCTTTGGTTGGTCCAACTGACTACAATATGGGGA	8.8	7.4	8.9	7.2	6.6	7.1	1.4	0.0012	0.038
MICRO.4106.C1	MICRO.4106.C1_518	NA	35.2	not assigned.unknown	NOT VALIDATED NA: NA	CAAAATCAAATTAATACTAATGCAAAAAGAAAATCAATTCAACACTAAGAATGACAATAA	8.1	8	7.8	6.7	6.7	7.6	1	0.0011	0.038
MICRO.4160.C4	MICRO.4160.C4_1256	NP_193590	11.9.2	lipid metabolism.lipid degradation.lipases	NOT VALIDATED NP_193590: triacylglycerol lipase [Arabidopsis thaliana]	GGCTTTGTTCTCTTTCGTGTAATGTTTGAATAAAAGGTTTTCGAGGGCTGTTTGGAAAAA	6.5	6.4	6	7.2	7.6	6.7	-0.8	0.0011	0.038
MICRO.4323.C1	MICRO.4323.C1_524	EAY72662	35.2	not assigned.unknown	NOT VALIDATED EAY72662: hypothetical protein OsI_000509 [Oryza sativa (indica cultivar-group)]	ATTTCAAGGTGTCTGTTGTAAGACAATATATGGCACTATTATCTGTATGACATTTGGGAC	8.8	8.4	9.4	8.3	8	6.9	1.2	0.0011	0.038
MICRO.4365.C1	MICRO.4365.C1_763	AAD25541	1.03.07	PS.calvin cyle.FBPase	NOT VALIDATED AAD25541: fructose-1,6-bisphosphatase precursor [Solanum tuberosum]	TTGCAGCAGGATACTGCATGTACTCAAGCTCTGTGATATTCGTACTCACCTTGGGAAATG	8	7.1	7.3	8.7	8.8	8.4	-1.1	0.0011	0.038
MICRO.477.C1	MICRO.477.C1_1081	P54260	13.2.5.2	amino acid metabolism.degradation.serine-glycine-cysteine group.glycine	NOT VALIDATED P54260: Aminomethyltransferase, mitochondrial precursor (Glycine cleavage system T protein) (GCVT)	ACTTTAATCTACATGTTGCTCGTTTTTGCTTATGAGTTCCTTTCAATGCAACATGGACCA	9.1	9	9	9.9	9.5	9.7	-0.6	0.0012	0.038
MICRO.5020.C2	MICRO.5020.C2_1709	NP_200933	35.1	not assigned.no ontology	NOT VALIDATED NP_200933: beta-glucuronidase [Arabidopsis thaliana]	AACTCGCAGAATTAGATGTAATTTAGCTTCCTCTTGGTGCTTTTGGATCTTTTCATGGGA	7.4	7.1	7.2	7.6	8.7	8.6	-1	0.0011	0.038
MICRO.5585.C2	MICRO.5585.C2_987	NP_193728	35.2	not assigned.unknown	NOT VALIDATED NP_193728: unknown protein [Arabidopsis thaliana]	AACCTCTTAAAGGGAACATGCAAATTGATGATAGCTTTGAGGTAGAGATGAAAGGTGGAG	12.1	12.7	12	13.1	13	12.9	-0.7	0.0012	0.038
MICRO.5665.C1	MICRO.5665.C1_807	NA	35.1.40	not assigned.no ontology.glycine rich proteins	NOT VALIDATED NA: NA	AGTCTGCTTAGTTTCAAATTGCTTTATATATCAGGTTCAGGGGTTGACATATGAATGCAT	8.9	7.4	9.4	7.7	6.6	6.6	1.6	0.0012	0.038
MICRO.5679.C1	MICRO.5679.C1_636	EAY77072	35.1	not assigned.no ontology	NOT VALIDATED EAY77072: hypothetical protein OsI_004919 [Oryza sativa (indica cultivar-group)]	GTTTCCTATTTCTTCTCAAGCTGAAGATGTATCTCATGTTAAAGATGAGGAATATGATCG	8.1	7.7	8.1	7.6	7.3	6.9	0.7	0.0011	0.038
MICRO.6049.C2	MICRO.6049.C2_1481	BAA98073	35.2	not assigned.unknown	NOT VALIDATED BAA98073: unnamed protein product [Arabidopsis thaliana]	ATCTACAGCTGAGTTTCATTAGACTACAGATTATACTGAGAATGACCATGTAGGAATTTG	10.3	9.8	10.9	9.2	9.3	9.3	1.1	0.0012	0.038
MICRO.6763.C1	MICRO.6763.C1_731	AAT94362	16.8.2	secondary metabolism.flavonoids.chalcones	NOT VALIDATED AAT94362: putative chalcone isomerase 4 [Glycine max]	ATTTTTGTTGTTTTGGTCATGTTGGCTATTGTATTTGGCCTATGGAGACCTTTTGTTTCA	7.5	6.8	6.7	8.8	8.1	7.7	-1.2	0.0012	0.038
MICRO.6780.C6	MICRO.6780.C6_211	AAD30454	20.2.1	stress.abiotic.heat	NOT VALIDATED AAD30454: 17.6 kD class I small heat shock protein [Lycopersicon esculentum]	AAGCTCATGTGTTTAAGGCCGATCTTCCAGGCTTAAGAAGGAGGAAGTGAAAGTGGAGAT	15.9	15	15.9	13.9	14.6	13.7	1.5	0.0011	0.038
MICRO.7344.C1	MICRO.7344.C1_1192	AAY68198	27.2	RNA.transcription	NOT VALIDATED AAY68198: RNA polymerase IV second largest subunit [Rhododendron macrophyllum]	TATGGGAAAATACTCGACTCTTGTATTTAAACCTTGTTGGTTATCAGGTTTGAAAAGGTG	9.5	9.8	9.4	10.4	10.7	10.2	-0.9	0.0012	0.038
MICRO.7436.C3	MICRO.7436.C3_509	NP_172815	11.8.1	lipid metabolism.'exotics' (steroids, squalene etc).sphingolipids	NOT VALIDATED NP_172815: unknown protein [Arabidopsis thaliana]	TTATGCTGTGTATTAATGCTCAGTTCTTAATTCAGGGGATTCAATATAGTCAACTAGCTC	7.2	7.7	7.2	6.7	6.8	6.7	0.6	0.0011	0.038
MICRO.7623.C1	MICRO.7623.C1_396	NP_189331	35.2	not assigned.unknown	NOT VALIDATED NP_189331: unknown protein [Arabidopsis thaliana]	TATATCTGGCAACTCAAATTTTCATACTCTAGATTTTAGAACAAAGGATTGGGGTACAGC	7.5	7	8	6.9	6.6	6.9	0.7	0.0012	0.038
MICRO.8444.C3	MICRO.8444.C3_498	NP_001057363	30.2.12	signalling.receptor kinases.leucine rich repeat XII	NOT VALIDATED NP_001057363: Os06g0272000 [Oryza sativa (japonica cultivar-group)]	CCATTGGATAATCACTTACAGAAGAAGCTTGATGTTGTTGCATCAATCATGGAAGTTGCA	6.3	6.7	6.4	6.8	8.1	7.3	-1	0.0011	0.038
MICRO.9946.C1	MICRO.9946.C1_648	NP_974346	27.1	RNA.processing	NOT VALIDATED NP_974346: S-adenosylmethionine-dependent methyltransferase/ catalytic [Arabidopsis thaliana]	GATGCACCTTTTGATGTTTGTAGCTGACAGATTGCTATGCATTATTCGTGGCCTACTGAG	9	8.6	8.9	8.4	7.8	7.1	1.1	0.0011	0.038
POADU13TP	POADU13TP_919	NP_973532	29.4	protein.postranslational modification	NOT VALIDATED NP_973532: ATP binding / kinase/ protein kinase/ protein serine/threonine kinase [Arabidopsis thaliana]	CCAAGTTTGCCGTGGCAGGGTTATCAGGTCTGCACCTTTCTCTACTTAATAGCAGTATTT	8.1	7.9	7.6	7.4	7.3	6.6	0.8	0.0011	0.038
STMGD94TV	STMGD94TV_406	NA	35.2	not assigned.unknown	NOT VALIDATED NA: NA	GCTGGCACTCGGGGATTTCTTGTTTTTTGTAAAAGAAATTTGTAGATAACACCTTGCATC	7.8	7.8	8.2	7.6	6.6	6.9	0.9	0.0011	0.038
STMHE70TV	STMHE70TV_625	NA	35.2	not assigned.unknown	NOT VALIDATED NA: NA	GTGGAAGGTGGAAGTCAAGATTAGCTGCTAAAGTAATGCATCTACAATGGTATTTTGAGA	10.2	9.4	10.1	9.2	9.2	9	0.8	0.0011	0.038
STMIB48TV	STMIB48TV_412	BAB09845	35.2	not assigned.unknown	NOT VALIDATED BAB09845: unnamed protein product [Arabidopsis thaliana]	TTTGAGAAGTGTATGCTATAATCAACTCAACGTACAACAATGTGTTGAACTACTTCGATC	7.2	8.2	6.9	6.2	6.7	6.5	1	0.0012	0.038
STMIG19TV	STMIG19TV_232	AAG23130	11.3	lipid metabolism.Phospholipid synthesis	NOT VALIDATED AAG23130: diacylglycerol kinase variant A [Lycopersicon esculentum]	TGAGGTTGATAGTGATGAAGAAAATTTGGTCAATGAAGAACGGAGGAAATTTGGGGCAGC	8	8.3	7.9	7.7	6.7	6.9	1	0.0011	0.038
STMII13TV	STMII13TV_95	NA	35.2	not assigned.unknown	NOT VALIDATED NA: NA	AAAGCATCCAAATTCTGTGGTTGTGTAATACTTCTCTGTGTGATTACCTGTAAGTGCAAA	8.2	8.9	8.3	9.5	9.4	9.3	-0.9	0.0011	0.038
STMMH58TH	STMMH58TH_351	AAL55889	35.2	not assigned.unknown	NOT VALIDATED AAL55889: unknown [Homo sapiens]	GCCCATTCGTCAGGACACCCACCCACCCAGTGTTATATTCTGCCTCGCCGGAGTGGGTGT	6.2	6.6	5.9	6.9	6.8	7.6	-0.9	0.0012	0.038
TBSK03686FD02.t3m.scf	TBSK03686FD02.t3m.scf_191	AAO88244	35.2	not assigned.unknown	NOT VALIDATED AAO88244: proteinase inhibitor II protein [Solanum phureja]	ACTGTTGTGCACGTTATAAACGGTTGCCAATTACTTATAGTGCAACATGGGGCTTTCATT	10.7	11.9	10.2	12.5	12.6	12.4	-1.6	0.0011	0.038
ACDA00995C11.T3m.scf	ACDA00995C11.T3m.scf_297	Q9Y896	31.1	cell.organisation	NOT VALIDATED Q9Y896: Actin-2	ATATGCCCTTCCTACAATGCAAGTTCTTCGGATTGGACCTAGCATAGGCGTGATCTTACT	11.5	10.9	10.9	9.9	9.6	10.1	1.3	0.0012	0.039
ACDA01139G11.T3m.scf	ACDA01139G11.T3m.scf_123	NA	35.2	not assigned.unknown	NOT VALIDATED NA: NA	GTCAGTGGGTTCTTCGGATGCCATTTGCGTCTATTCCGATCGGTTCAATTCTATCGAGTA	8.6	8.4	8.3	7.3	8.2	7.2	0.9	0.0012	0.039
bf_acdcxxxx_0025g12.t3m.scf	bf_acdcxxxx_0025g12.t3m.scf_641	NA	35.2	not assigned.unknown	NOT VALIDATED NA: NA	GGAGGAGTGCTCTGAGCTTGATTTACTGCTCAAGTTATGTGGTGAGGAGGATGAAGTATA	7.2	7.3	6.9	6.6	6.5	6.6	0.6	0.0012	0.039
bf_arrayxxx_0015f04.t3m.scf	bf_arrayxxx_0015f04.t3m.scf_639	NP_193491	27.3.09	RNA.regulation of transcription.C2C2(Zn) GATA transcription factor family	NOT VALIDATED NP_193491: transcription factor [Arabidopsis thaliana]	ACAACATGGTAGTGTTGCCATATCCCATGCAAAAACTTTATATTGGAATTTGTAAAAGGG	9.2	9.4	8.9	9.8	9.9	10.4	-0.9	0.0012	0.039
bf_arrayxxx_0038e06.t7m.scf	bf_arrayxxx_0038e06.t7m.scf_524	AAU90317	35.2	not assigned.unknown	NOT VALIDATED AAU90317: TPR domain containing protein, putative [Solanum demissum]	AAGCTCATTACATTTTCAAGATTAGTCAAGAACGTGTCCATCTTTAAACAAGTTGGAGTC	6.4	6.6	6.3	6.7	7.1	7.6	-0.7	0.0012	0.039
bf_arrayxxx_0048e12.t7m.scf	bf_arrayxxx_0048e12.t7m.scf_536	NA	10.4	cell wall.pectin synthesis	NOT VALIDATED NA: NA	ATGCCCGTAGGTGGTATCTTGTCTATCCCAAGTCTTAGTTTATTTTTTCGAGCAGCAGTT	10.9	11.5	10.7	12.1	12	12	-1	0.0012	0.039
bf_arrayxxx_0056g12.t7m.scf	bf_arrayxxx_0056g12.t7m.scf_944	NA	35.2	not assigned.unknown	NOT VALIDATED NA: NA	TCAGATCAACTTTTGGACATGGAATCACTAGAATTGTAAAATATTTGGGCAGTTGTGTAG	8.5	8.6	8.1	8.9	9.1	9.4	-0.7	0.0012	0.039
bf_cswbxxxx_0006d10.t3m.scf	bf_cswbxxxx_0006d10.t3m.scf_340	NA	35.2	not assigned.unknown	NOT VALIDATED NA: NA	CTTGTGAGTTCAATTGAATCCATTTGGTCTCGGCTTACATCTCTCTTTTTATGTTACAAA	9	9	8.9	9.9	10.3	9.6	-1	0.0012	0.039
BF_LBCHXXXX_0021C11_T3M.SCF	BF_LBCHXXXX_0021C11_T3M.SCF_320	NA	35.2	not assigned.unknown	NOT VALIDATED NA: NA	GGTTAAGTTTTCTTCGGGTGTAAACTGCCTTTGTTTCTGAAACACAAACAAATTCCATTC	9.7	9	9.7	8.7	8.4	8.8	0.9	0.0012	0.039
bf_lbchxxxx_0060a01.t3m.scf	bf_lbchxxxx_0060a01.t3m.scf_225	NA	35.2	not assigned.unknown	NOT VALIDATED NA: NA	AGCTGTTGTGGAAAGGAATCTGTCTCTTGACTGCAAAATTGACTGTTGTTTTTCATCCTC	8.3	7.4	9.1	6.7	6.9	7	1.4	0.0012	0.039
bf_mxlfxxxx_0073a08.t3m.scf	bf_mxlfxxxx_0073a08.t3m.scf_594	NP_001048200	25	C1-metabolism	NOT VALIDATED NP_001048200: Os02g0761900 [Oryza sativa (japonica cultivar-group)]	TATTTTTATGGAGCTTATAGTCTTACTACTACTGCTTTATATGCTATGGGAATCACGAGC	10.9	11.9	10.5	12	12	12.4	-1.1	0.0012	0.039
bf_stolxxxx_0063g03.t3m.scf	bf_stolxxxx_0063g03.t3m.scf_457	ABH07904	35.2	not assigned.unknown	NOT VALIDATED ABH07904: squamosa promoter binding-like protein [Lycopersicon esculentum]	GGCAGTGAAATAACCTACTTTCTGAAGAAATTACATAAACAAGATGTGGTTTAAGCATGC	7.1	7	7.1	8.4	8.4	8.1	-1.2	0.0012	0.039
bf_suspxxxx_0055e01.t3m.scf	bf_suspxxxx_0055e01.t3m.scf_647	ABD96865	35.2	not assigned.unknown	NOT VALIDATED ABD96865: hypothetical protein [Cleome spinosa]	CAATTTCACTCTAGCAATTTATTGGTCACCATTTTTGGTTTCAACGAAAGAAGTAGATGC	6.8	7.2	6.6	7.4	8.1	7.7	-0.9	0.0012	0.039
cPRO27H2TH	cPRO27H2TH_554	P26360	9.9	mitochondrial electron transport / ATP synthesis.F1-ATPase	NOT VALIDATED P26360: ATP synthase gamma chain, mitochondrial precursor	GCAAAGCTCACCTGGTGCGAGATTCAAAAAAGACATGAACTGGCATGACTGAGTGCAAAA	8.3	8.1	8.1	7.6	6.4	6.7	1.3	0.0012	0.039
cSTB3I17TH	cSTB3I17TH_496	AAR89821	29.4	protein.postranslational modification	NOT VALIDATED AAR89821: CTR1-like protein kinase [Lycopersicon esculentum]	TTCCGAGATTTGGACAAGTTGAACCTGCCATGGATTTCACGTCACTGGCCAAACACTATT	7.5	7.5	7.4	7	6.4	6.7	0.7	0.0012	0.039
cSTB3O9TH	cSTB3O9TH_385	NP_568500	35.2	not assigned.unknown	NOT VALIDATED NP_568500: unknown protein [Arabidopsis thaliana]	ACCCTAATCCAAAGGACTATCAACGGGATGGTTTTCCATATTCAAGTCATACTAATGGCA	7.9	8.1	7.7	7	7.1	7.2	0.8	0.0012	0.039
cSTS6K9TH	cSTS6K9TH_621	AAT40556	35.2	not assigned.unknown	NOT VALIDATED AAT40556: hypothetical protein SDM1_4t00019 [Solanum demissum]	TGGCTAGTGATAAAGGGAGCTTGTCTAACACAAGAAGTACTTCAGAAGAAGGGGTAAATA	7.5	7.3	7.5	8.1	7.9	8.7	-0.8	0.0013	0.039
MICRO.10426.C1	MICRO.10426.C1_705	ABE81799	19.1	tetrapyrrole synthesis.glu-tRNA synthetase	NOT VALIDATED ABE81799: Glutamyl-tRNA synthetase, class Ic; Glutamyl-tRNA synthetase archae/euk cytosolic; Glutathione S-transferase, C-terminal-like [Medicago truncatula]	GGGCCAAATGTGCAAGACCATTCGTTTTTTCAAGATCATTAGGTGTAATTTCCTATTTGG	15.4	12.4	15.9	12.1	12.2	12	2.5	0.0012	0.039
MICRO.10771.C1	MICRO.10771.C1_734	NP_194432	35.2	not assigned.unknown	NOT VALIDATED NP_194432: unknown protein [Arabidopsis thaliana]	CTTGAACAAACGACTCGGAACTAAGAACCTTAGTCTTCCTGATGGTTCTTGTGGAAGTGA	8.3	8.3	8.1	7.9	6.6	6.9	1.1	0.0012	0.039
MICRO.1096.C3	MICRO.1096.C3_775	NP_849994	31.2	cell.division	NOT VALIDATED NP_849994: HBT (HOBBIT) [Arabidopsis thaliana]	TTATAATGGAGCAGCTGCTATCCAGATTTAGGTGGGGGTTCTACTAACATGTCATTCTAC	7.4	7.7	7.2	6.6	7	6.3	0.8	0.0012	0.039
MICRO.12033.C1	MICRO.12033.C1_1125	NP_565187	17.3.02.02	hormone metabolism.brassinosteroid.signal transduction.BZR	NOT VALIDATED NP_565187: transcription regulator [Arabidopsis thaliana]	CACTTCTGGATGTGAAGATGTTTTGGTTAGTAAAACCAATTTAAAATGCACAGTAGCAAC	7.6	7.5	7.4	8.2	8.3	7.9	-0.6	0.0012	0.039
MICRO.122.C1	MICRO.122.C1_897	NA	35.2	not assigned.unknown	NOT VALIDATED NA: NA	CTCACCCTTTTCCTCAAGTCTGCATTTTTCTTCAAATAGAATTTTCTCCTAAGACAAAAG	6.4	6.6	6.1	7.4	6.7	7.3	-0.7	0.0012	0.039
MICRO.12570.C1	MICRO.12570.C1_3	NP_568754	35.2	not assigned.unknown	NOT VALIDATED NP_568754: catalytic [Arabidopsis thaliana]	TCTCCGGCTTTCTACAAAGCGGTTAACCTAACTCCGACGAAGTACCTAATTTCCGATCAT	8.4	8	8.1	7.3	7.5	7.7	0.7	0.0012	0.039
MICRO.13334.C1	MICRO.13334.C1_820	AAO21304	35.2	not assigned.unknown	NOT VALIDATED AAO21304: auxin-repressed protein-like protein [Nicotiana tabacum]	GGAACTTCTGCATCAAATAGATGATGATTATGTTAATATCAGGGAGAGAGAAACTACAAG	9.8	10.7	9.4	10.9	11.3	12.2	-1.5	0.0012	0.039
MICRO.13871.C1	MICRO.13871.C1_1325	BAD15107	35.2	not assigned.unknown	NOT VALIDATED BAD15107: hypothetical protein [Nicotiana tabacum]	ATCTGTAAGAACAATGTATTTTGCATTCATCTATTCTGTGGTAAAATGGCTTCAGAGCTG	8.7	9.4	8.7	9.9	9.6	9.6	-0.8	0.0012	0.039
MICRO.13911.C1	MICRO.13911.C1_1	NP_181906	35.2	not assigned.unknown	NOT VALIDATED NP_181906: unknown protein [Arabidopsis thaliana]	ATCATCTTCAGGTTCCTTCTTCACCAAGATTTCCAGGAGAAAAAAGCAGAATACAAAGTC	11	11.1	10.8	11.8	11.5	12.3	-0.8	0.0012	0.039
MICRO.14835.C1	MICRO.14835.C1_1529	NP_179460	3.2.3	minor CHO metabolism.trehalose.potential TPS/TPP	NOT VALIDATED NP_179460: ATTPS11; transferase, transferring glycosyl groups [Arabidopsis thaliana]	AATCTCGTCCGGTACCTGCAGACCTTGACTGGAAAAAAGTGGTGTTGCCTATTATGAAGA	10.5	8.5	11.1	8.7	7.4	7.5	2.2	0.0012	0.039
MICRO.14849.C1	MICRO.14849.C1_566	ABE82605	27.3.38	RNA.regulation of transcription.AT-rich interaction domain containing transcription factor family	NOT VALIDATED ABE82605: AT-rich interaction region; Heat shock protein Hsp20 [Medicago truncatula]	AGTGGAACATCCTTCGAAAGTGGCACGAACAGAAACATCTAAGCAGTTGGTTACAACAGT	7.7	7.7	7.8	6.8	7	6.6	0.9	0.0013	0.039
MICRO.16065.C1	MICRO.16065.C1_732	NA	35.2	not assigned.unknown	NOT VALIDATED NA: NA	AAAGGGATAAAAATCGTCATATCAGATTCACATTCTTTTCAACTCTGTTCAAATCTATAT	7.6	8.4	7.5	6.5	6.9	7.4	0.9	0.0012	0.039
MICRO.16678.C1	MICRO.16678.C1_651	AAU89742	29.4.1.57	protein.postranslational modification.kinase.receptor like cytoplasmatic kinase VII	NOT VALIDATED AAU89742: serine/threonine protein kinase-like [Solanum tuberosum]	ATGTATTGTAAGCGGAGCTCAAGTCCATGGAGTAAATATTGTGTCGAATGTAACAAAAAA	12.1	10.8	12.5	10.5	10.9	10.3	1.2	0.0012	0.039
MICRO.17990.C1	MICRO.17990.C1_608	NP_197360	35.1	not assigned.no ontology	NOT VALIDATED NP_197360: unknown protein [Arabidopsis thaliana]	CAGATCAAGCTTAAGTAAAGCTGCTGGGGAACTTGCGTATCTTGGGAATCCGTTTGACAT	7.1	7.2	7	7.4	8.2	8.5	-0.9	0.0012	0.039
MICRO.2271.C1	MICRO.2271.C1_677	AAG09104	29.3.4.99	protein.targeting.secretory pathway.unspecified	NOT VALIDATED AAG09104: Putative clathrin-associated adaptor protein [Arabidopsis thaliana]	AGTTCAAGTGAATTCTCATCTTTCCCGACTTCCCTGATCTTACCCTTTCATTTGCAAATA	9.5	8.2	9.4	8	7.1	8	1.3	0.0012	0.039
MICRO.2534.C2	MICRO.2534.C2_1232	AAT39459	21.01	redox.thioredoxin	NOT VALIDATED AAT39459: protein disulfide isomerase [Ipomoea batatas]	GAGCTTTTCAGCGCCAATAAAACGGTTGTATGTATCCATTTTGTGTATCGAATGTAGTTG	10.8	11.2	10.6	12.2	12.5	11.3	-1.1	0.0012	0.039
MICRO.2916.C1	MICRO.2916.C1_1065	AAX20016	33.99	development.unspecified	NOT VALIDATED AAX20016: FCA gamma [Pisum sativum]	GTTTCCTTCCCAACAAGTTCCTGAAATGCAAGCACAGTCTCGAAGTCAGCTTCCAACATA	8.8	8.7	8.5	8.5	7.8	7.5	0.8	0.0012	0.039
MICRO.3262.C1	MICRO.3262.C1_2211	NP_172277	35.1	not assigned.no ontology	NOT VALIDATED NP_172277: unknown protein [Arabidopsis thaliana]	TAGAACCTGCCAGAATAGTTCATAGTGTTAGCTACTGGGCTAAATGTAGTAGGATGACGA	8.4	8.2	8.3	7.7	7.9	7.2	0.7	0.0012	0.039
MICRO.331.C18	MICRO.331.C18_950	P07370	1.01.01.02	PS.lightreaction.photosystem II.PSII polypeptide subunits	NOT VALIDATED P07370: Chlorophyll a-b binding protein 1B, chloroplast precursor (LHCII type I CAB-1B) (LHCP)	TTGTGTAGTTCTGAGTTACATTTTCCAAAGCTACGAATCAAATATTGCCACTTTCATACC	6.9	6.5	6.4	7.2	7.1	7.5	-0.7	0.0012	0.039
MICRO.331.C20	MICRO.331.C20_1389	NP_564555	35.1	not assigned.no ontology	NOT VALIDATED NP_564555: S-methyl-5-thioribose kinase [Arabidopsis thaliana]	TGTTGGCCTTTTGACTAAGCGTTGATATGTTTGCTTTATGACTAAGCATTCTGGAGTCTA	12	13	12	13.5	13.7	13.4	-1.2	0.0012	0.039
MICRO.4844.C1	MICRO.4844.C1_595	BAC43604	35.2	not assigned.unknown	NOT VALIDATED BAC43604: unknown protein [Arabidopsis thaliana]	TGGTGAAGATACTTGTTACCCACTCGACTCTTCCAATACTGATCTATAATCCCAAAACGA	11.9	13.7	11.1	13.7	14.3	14.7	-1.9	0.0012	0.039
MICRO.5350.C1	MICRO.5350.C1_1556	P52581	16.2	secondary metabolism.phenylpropanoids	NOT VALIDATED P52581: Isoflavone reductase homolog	AATGCTGAAGAAGCCTCTGCTCTCTACCCTGAAGTTTGTTATACTCGTATGGACGAATAT	10.2	11.9	9.4	12.4	12.4	12.3	-1.8	0.0012	0.039
MICRO.609.C1	MICRO.609.C1_727	O04397	7.3	OPP.electron transfer	NOT VALIDATED O04397: Ferredoxin--NADP reductase, root-type isozyme, chloroplast precursor (FNR)	CCTGGTGACAAAGGTGAAAGATCACAGGGTCCTTTCCTGGGTAAGGATAATGCTTTCTAA	7.4	7.9	7.9	7.3	6.8	6.7	0.8	0.0012	0.039
MICRO.6261.C1	MICRO.6261.C1_737	NP_001056650	34.13	transport.peptides and oligopeptides	NOT VALIDATED NP_001056650: Os06g0125400 [Oryza sativa (japonica cultivar-group)]	GCTAGAGGCATTGTTACAGAGGGTTGCCCAGTTGTTTATTGAATTGTGAATAACAACCAC	9.2	9.7	8.6	10.4	10.1	10	-1	0.0012	0.039
MICRO.636.C1	MICRO.636.C1_1130	ABB29920	35.2	not assigned.unknown	NOT VALIDATED ABB29920: CAPIP1-like [Solanum tuberosum]	GGGGGACTGAATAGAAGCACATTTAAGGCTCCAACAGTCCATGAGTTAATGCTGTACAGA	9.7	8.7	11.7	8.3	8.1	7.4	2.1	0.0012	0.039
MICRO.6490.C1	MICRO.6490.C1_830	NP_196876	35.2	not assigned.unknown	NOT VALIDATED NP_196876: unknown protein [Arabidopsis thaliana]	ATCTGCATAAGTCAGACTAACTGTTGACATGTACCATAGTAATATGTATATGTAGCCAAG	11.4	11.9	10.5	12.7	12.6	12.4	-1.3	0.0012	0.039
MICRO.7068.C1	MICRO.7068.C1_849	NA	35.2	not assigned.unknown	NOT VALIDATED NA: NA	AACTGCGGCAATGTTTAGTGGATGTTTTCTATTCATAAAAATCACTATGATTTGCTGCTG	12.9	13.4	12.4	13.8	13.7	14	-0.9	0.0012	0.039
MICRO.8051.C1	MICRO.8051.C1_1307	BAE71289	35.2	not assigned.unknown	NOT VALIDATED BAE71289: hypothetical protein [Trifolium pratense]	TATTGCTATGTTAATTCCTCTATCCGGTTCATTTGTTTGTGCTAGGTTTTGCTCCTTAGC	9.6	10.4	9.2	10.7	10.9	10.8	-1	0.0012	0.039
MICRO.8313.C1	MICRO.8313.C1_649	NP_194961	35.2	not assigned.unknown	NOT VALIDATED NP_194961: unknown protein [Arabidopsis thaliana]	CTGCTGCAAGATATAGCGGTAGAATTTTCCATAAGGTGGGACTCCCTGGGGATTTCAAAA	7.7	8	7.7	6.8	6.6	6.9	1.1	0.0012	0.039
MICRO.8857.C1	MICRO.8857.C1_456	AAM64457	35.1	not assigned.no ontology	NOT VALIDATED AAM64457: unknown [Arabidopsis thaliana]	ACATTTTGTAGCCATGGTGAAGGAGCTATTATTGCTTCTTTTATTGGTTTGCTCTTAATG	7.1	7.4	8.1	7.1	6.5	6.6	0.8	0.0012	0.039
MICRO.9469.C1	MICRO.9469.C1_699	NP_197565	34.12	transport.metal	NOT VALIDATED NP_197565: COPT5; copper ion transporter [Arabidopsis thaliana]	ACATAGCAGTATTGGATCTGGTGATCTTTCATTTTTCCTTTCTGTCTGTTGGATTTCTTG	10.1	10.4	10	10.8	10.9	11	-0.8	0.0012	0.039
POACR93TP	POACR93TP_655	NP_001067993	26.03	misc.gluco-, galacto- and mannosidases	NOT VALIDATED NP_001067993: Os11g0525600 [Oryza sativa (japonica cultivar-group)]	GATTGTTCCCAAAGAGAAAGATAAACAAGATTAAAGAGATGAGTTTATCTGCCAACCAAG	8.8	9.2	8.3	9.4	9.8	9.5	-0.8	0.0012	0.039
PPCBK38TH	PPCBK38TH_283	P50433	1.02.05	PS.photorespiration.serine hydroxymethyltransferase	NOT VALIDATED P50433: Serine hydroxymethyltransferase, mitochondrial precursor (Serine methylase) (Glycine hydroxymethyltransferase) (SHMT)	GAAACCATGAAGTACAAAAACTAAGAGGCACCTAATATCCAGATTCATAAAGGTGAAAGG	7.6	8.4	7.5	8.9	9.1	9.2	-1.2	0.0012	0.039
SSBN001I21u.scf	SSBN001I21u.scf_261	YP_173390	35.2	not assigned.unknown	NOT VALIDATED YP_173390: hypothetical protein NitaMp044 [Nicotiana tabacum]	GACCGCTTCGCCAGCAAAGCTGCCTATAATGCCAACAAACCCAATGTCCCCTGGGCAAAT	6.4	6.4	6.5	7.3	6.6	7.6	-0.7	0.0012	0.039
STMGX20TV	STMGX20TV_469	EAY73681	35.2	not assigned.unknown	NOT VALIDATED EAY73681: hypothetical protein OsI_001528 [Oryza sativa (indica cultivar-group)]	TTAGGAACTGAGATACATGAGCATTATAGCTTTTAACCCAATGAAGGTAATCAAGTTTGG	7.8	7.1	7.4	7.8	8.4	8.5	-0.8	0.0012	0.039
STMIF50TV	STMIF50TV_44	NA	35.2	not assigned.unknown	NOT VALIDATED NA: NA	TTATTTAAATTTTTTTTGGTTATATGTTTTGCTTATTATTGTATTTTTGTTTTATTCTTC	6.3	6.1	6.7	7	7.4	6.8	-0.7	0.0012	0.039
TBSK00665FH05.t3m.scf	TBSK00665FH05.t3m.scf_255	CAA81735	35.2	not assigned.unknown	NOT VALIDATED CAA81735: patatin [Solanum tuberosum]	CTACTCCCAATGAAAACAATCGAATCCTTTGCTGCTGCAATGAAATTGTATCTTTTTTAC	11.9	13.5	10.7	14	14.7	14.5	-2.3	0.0012	0.039
ACDA01163A11.T3m.scf	ACDA01163A11.T3m.scf_266	NA	35.2	not assigned.unknown	NOT VALIDATED NA: NA	ACTACTGATACACTGGCAGCATATGACTTTGCACGAAATGGGAATTGATGCTGGATTACA	8.6	8.2	8.2	7.4	7.8	7.3	0.9	0.0013	0.04
ACDA04204G04.T3m.scf	ACDA04204G04.T3m.scf_149	NA	35.2	not assigned.unknown	NOT VALIDATED NA: NA	TTACAGGAGGTGCTGTGCTACTGCTTCAAAGTTCCTTATTTATCTCACATGAATTTACGT	11.7	13.5	10.4	13.6	14	13.9	-2	0.0013	0.04
bf_acdcxxxx_0014g10.t3m.scf	bf_acdcxxxx_0014g10.t3m.scf_34	NA	35.2	not assigned.unknown	NOT VALIDATED NA: NA	ATTATAATGTATGGATTTGATAATTATCTTTTCTTCTGTTATAGAAAAACTCTTTCCCTT	8.5	9.2	8.7	9.8	10.1	9.4	-1	0.0013	0.04
bf_arrayxxx_0025h01.t3m.scf	bf_arrayxxx_0025h01.t3m.scf_70	NA	20	stress	NOT VALIDATED NA: NA	GGAAGAAAAAGCAGTCAGCTGCGGCTCTATTTGAATACTGGCGGGGTCTGGTTGATTCTT	8.1	7.2	7.8	7.2	6.5	6.6	0.9	0.0013	0.04
bf_ivrootxx_0064a12.t3m.scf	bf_ivrootxx_0064a12.t3m.scf_498	CAF74935	20	stress	NOT VALIDATED CAF74935: zinc finger DNA-binding protein [Catharanthus roseus]	AGATGATCAGTCAACTACCTCTACGTACTACTAACGCTACCGGAACTACTATCTCCGGTA	11.5	9.8	11.6	9.6	9.1	8	2.1	0.0013	0.04
bf_mxflxxxx_0025d05.t3m.scf	bf_mxflxxxx_0025d05.t3m.scf_315	AAD13632	10.7	cell wall.modification	NOT VALIDATED AAD13632: expansin precursor [Lycopersicon esculentum]	GTTTTCCGATACGCATTTCCATTTTTGCTTACCGTTTATATTTTCGGGAAGTTTCGCCTA	7	6.4	6.5	7.7	7.2	7.4	-0.8	0.0013	0.04
bf_mxlfxxxx_0012g07.t3m.scf	bf_mxlfxxxx_0012g07.t3m.scf_677	NA	35.2	not assigned.unknown	NOT VALIDATED NA: NA	TGGGCCCACTTGCATTGTACTCCATACACGTGTGATTGCTTCCTATTTGAGACTATCTCT	6.2	6.6	6.3	6.7	7.5	7.5	-0.9	0.0013	0.04
bf_mxlfxxxx_0065f03.t3m.scf	bf_mxlfxxxx_0065f03.t3m.scf_171	NA	30.1	signalling.phosphorelay	NOT VALIDATED NA: NA	ATTAACTCAATGCTTACGGGGATTAGCTAGCCCTTAGTGAAGGAAAATGCTTACTGAATT	13.6	13.1	13.7	12.7	12.5	13	0.7	0.0013	0.04
bf_stolxxxx_0043a09.t3m.scf	bf_stolxxxx_0043a09.t3m.scf_164	NA	35.2	not assigned.unknown	NOT VALIDATED NA: NA	CACAGCACTACAGAGTGAAGGCTAACGGTTCTGGAGATCAAGACCATCACCGTCACCGTG	7.7	7.3	7.6	6.8	6.7	6.6	0.8	0.0013	0.04
bf_suspxxxx_0015g04.t3m.scf	bf_suspxxxx_0015g04.t3m.scf_341	NA	12.2.02	N-metabolism.ammonia metabolism.glutamine synthase	NOT VALIDATED NA: NA	GTATTTTCATACAGCAGAGGCCGTTATACATTGTCTGATGATTTGGCAATGCATGTGTTA	8.1	9	8.5	8	7.1	6.9	1.2	0.0013	0.04
bf_swstxxxx_0042h07.t3m.scf	bf_swstxxxx_0042h07.t3m.scf_227	BAD29721	26.02	misc.UDP glucosyl and glucoronyl transferases	NOT VALIDATED BAD29721: UDP-glucose glucosyltransferase [Catharanthus roseus]	TGGACTATTTCGTGGGGAAATATGAGCATGTCGACATTGTGACTGCCAAGGAAATTGAAA	11.8	11.6	11.8	9.6	10.1	10.7	1.6	0.0013	0.04
cPRO14J14TH	cPRO14J14TH_223	BAC79666	31.3	cell.cycle	NOT VALIDATED BAC79666: putative peptidyl-prolycis-trans isomerase protein [Oryza sativa (japonica cultivar-group)]	GGTGAAGCCAAAAGCACTGCAAAAATTCAGGTTGTTATATATGGGTTTTCAGCACCACTG	7.6	7.6	7	6.3	6.7	6.8	0.8	0.0013	0.04
cSTA10C20TH	cSTA10C20TH_463	AAM65335	16.1.4	secondary metabolism.isoprenoids.carotenoids	NOT VALIDATED AAM65335: unknown [Arabidopsis thaliana]	CTTTGGCACTGAGAAACAAGCTAGGTGGAAAGTTTGTTGAAACTAAAAAGAGGGGAGACA	7.7	7.3	7.4	6.3	6.8	6.7	0.9	0.0013	0.04
cSTA19E5TH	cSTA19E5TH_379	ABE86658	29.5.11.04.02	protein.degradation.ubiquitin.E3.RING	NOT VALIDATED ABE86658: Zinc finger, RING-type; Transcription factor jumonji, jmjC [Medicago truncatula]	TGGAGTAGAGGTAAACCTGTTATCATCAAGGATATATATGATGTATCATCGATGTCAAAC	7.7	7.1	7.3	6.6	6.8	6.8	0.7	0.0013	0.04
cSTA29O5TH	cSTA29O5TH_78	ABC01895	29.3.4.99	protein.targeting.secretory pathway.unspecified	NOT VALIDATED ABC01895: transporter-like protein [Solanum tuberosum]	CCTCACGCTCACTTTTTTGTGCTTCTTCTTCCGTTTTCTCGTCAGGTAAAGCTCAAGTAA	8.4	8.6	8.1	9.6	9.2	9	-0.9	0.0013	0.04
cSTA36I15TH	cSTA36I15TH_271	NA	35.2	not assigned.unknown	NOT VALIDATED NA: NA	AATCGGAACCAACCCCGGGTCGACCTTACCAACAGAAGGTTCGACCCGAAAACGAAAGTT	8.5	8.1	8.6	7.8	7.7	7.8	0.7	0.0013	0.04
cSTB36E10TH	cSTB36E10TH_444	NA	35.2	not assigned.unknown	NOT VALIDATED NA: NA	AAATTCTGACTCTGAATCTTCTGAGATAATGAGCACAAGTGAGCTCATATCAGCAGTTGG	7.1	6.9	6.8	6.5	6.2	6.3	0.6	0.0013	0.04
MICRO.10550.C1	MICRO.10550.C1_770	NA	35.2	not assigned.unknown	NOT VALIDATED NA: NA	TCAATTTTTCAAGTTGGTGGATCACCCGTCACCCATTTGTAGACATAGCAACTCCGCTGA	8.2	8	8	7.9	6.9	6.6	0.9	0.0013	0.04
MICRO.11051.C2	MICRO.11051.C2_993	NP_568090	35.2	not assigned.unknown	NOT VALIDATED NP_568090: unknown protein [Arabidopsis thaliana]	AGAGGAAAGTCCCATGATGAAATGTAACAGTAGCCTGGTAATGTCTCATTTGATATTTTT	7.7	8.2	8	7.2	6.8	7	1	0.0013	0.04
MICRO.11181.C1	MICRO.11181.C1_229	NA	35.2	not assigned.unknown	NOT VALIDATED NA: NA	AGAGTAGCAAGTGGTGCAAGACTTTGTTGAATCTGAAGTCTTAAAGCTTTGGTTGATTTT	7.4	7.7	7.1	7.7	8.5	8.1	-0.8	0.0013	0.04
MICRO.11193.C1	MICRO.11193.C1_570	NP_192418	23.2	nucleotide metabolism.degradation	NOT VALIDATED NP_192418: 3'(2'),5'-bisphosphate nucleotidase/ inositol or phosphatidylinositol phosphatase [Arabidopsis thaliana]	GTATCTTTCCTCTTTCGGTCTCTATGGACAGATAATATACTGAAATGGTGTGGAGAAAAA	7.2	7.4	7.4	6.7	6.7	6.5	0.7	0.0013	0.04
MICRO.120.C1	MICRO.120.C1_256	ABE83515	35.2	not assigned.unknown	NOT VALIDATED ABE83515: hypothetical protein MtrDRAFT_AC129091g11v2 [Medicago truncatula]	GCTCCGATCGCTGATGGAAATGGTAAGGCTTACGATTTCGGTGAAGATTCTGAAGGAATT	10.6	10.1	10.4	9.8	9.1	9.8	0.8	0.0013	0.04
MICRO.12017.C2	MICRO.12017.C2_21	NA	35.2	not assigned.unknown	NOT VALIDATED NA: NA	TTGCTGCTTCGTAACTGCTCAGCGGGCACTTGCTATTATTTCACGCCATGTTTTCTGAAT	9	8.2	8.8	8.2	7.4	6.8	1.1	0.0013	0.04
MICRO.13349.C1	MICRO.13349.C1_423	NA	35.2	not assigned.unknown	NOT VALIDATED NA: NA	CGACCTTTGTGACTCAATGATGTTAAGAGGTTTGACTGGTAGAATGACATGTAAAGCACT	7.9	8.7	7.7	9.3	8.7	9.3	-1	0.0013	0.04
MICRO.15591.C1	MICRO.15591.C1_818	NP_567238	29.5.09	protein.degradation.AAA type	NOT VALIDATED NP_567238: ATP binding / ATPase/ nucleoside-triphosphatase/ nucleotide binding [Arabidopsis thaliana]	TAAGCTTGAACATTTACCTGAGAATGTCATTGTCATAGCTTTCCCATACCCAAACAGACA	7.9	7.6	7.6	6.7	6.5	6.8	1.1	0.0013	0.04
MICRO.16113.C1	MICRO.16113.C1_495	NP_001059610	17.5.3	hormone metabolism.ethylene.induced-regulated-responsive-activated	NOT VALIDATED NP_001059610: Os07g0471900 [Oryza sativa (japonica cultivar-group)]	AGAAAAGAAGTTGATTTAAGGAGCAAAGGACTTTGTTTAGTTCCCATTTCATGTACCCCT	7.9	8.4	8.1	7	7	7.8	0.8	0.0013	0.04
MICRO.16579.C1	MICRO.16579.C1_458	BAD44833	30.2.27	signalling.receptor kinases.C-Lectin	NOT VALIDATED BAD44833: putative protein kinase [Oryza sativa (japonica cultivar-group)]	GGTTGAGATGTAATACAACTACTAATTTGTATCACTAAAGCCAGTATGCTTTTCATCTGC	8	8.1	8	7.8	7	7.1	0.8	0.0013	0.04
MICRO.2014.C1	MICRO.2014.C1_1855	NP_188804	34.4	transport.nitrate	NOT VALIDATED NP_188804: transporter [Arabidopsis thaliana]	AAATACAGCATATTAGCTTTCAACGAATCATTCATTTCCAGAGTTTGTACTATAGGACCG	11.9	12.8	11.8	13	13.2	13.6	-1.1	0.0013	0.04
MICRO.2359.C1	MICRO.2359.C1_760	NP_195272	35.1	not assigned.no ontology	NOT VALIDATED NP_195272: protein binding [Arabidopsis thaliana]	GTGATTCCACCTTAAGCCCGGCGTCATAAGTGGGTCAGGATGGTGAGAAATTAAGTTTAA	9.1	7.5	9.3	7.9	6.6	6.7	1.6	0.0013	0.04
MICRO.2969.C1	MICRO.2969.C1_603	ABE84411	35.2	not assigned.unknown	NOT VALIDATED ABE84411: hypothetical protein MtrDRAFT_AC122168g9v2 [Medicago truncatula]	TCCTCGTGATGGTGCTGCTGCTACTGCTAAAATTGGACCCGAGATTAATGTAAACGGTAA	14.2	13.6	14.1	13.2	13.2	13.3	0.8	0.0013	0.04
MICRO.3219.C3	MICRO.3219.C3_155	NA	1.03.04	PS.calvin cyle.GAP	NOT VALIDATED NA: NA	GAAACCAATTATTGTTCATTTCTTCCTTTGAGCTTATGAAGATTAATGTTGGTGGATTAA	8.5	9.7	9	11.1	11.1	10.2	-1.7	0.0013	0.04
MICRO.3574.C1	MICRO.3574.C1_711	NA	35.2	not assigned.unknown	NOT VALIDATED NA: NA	GGTGAAGTCGACCAATCTATTACTAGAAAGTGTAAAATAGAAAGTGTGCATCTAAAATGG	7.2	7.9	6.9	6.4	6.7	6.5	0.8	0.0013	0.04
MICRO.3782.C1	MICRO.3782.C1_444	ABE80923	35.1	not assigned.no ontology	NOT VALIDATED ABE80923: Zinc phosphodiesterase ELAC protein 2 , related [Medicago truncatula]	TACTTCTCGGCCAAAAATCATAGAAGACTTAATTACAGAAATTCCTGAAATTGTGGATGC	7.4	7.1	7.4	6.3	6	6.9	0.9	0.0013	0.04
MICRO.489.C1	MICRO.489.C1_1130	EAY77028	35.1	not assigned.no ontology	NOT VALIDATED EAY77028: hypothetical protein OsI_004875 [Oryza sativa (indica cultivar-group)]	CCCTTACGTTGAAAGTTGTCTTCAAGAATGAACTGGCAACGCCATGCAAATTTTTGTGCC	9.4	9.5	9.4	8.9	8.8	8.1	0.8	0.0013	0.04
MICRO.6022.C2	MICRO.6022.C2_703	ABO81647	29.5.11.04.03.02	protein.degradation.ubiquitin.E3.SCF.FBOX	NOT VALIDATED ABO81647: Cyclin-like F-box [Medicago truncatula]	CCTAAACATTGTTTCACCAGGGGCTGAAGTTCTTGTACATTCAGGACAGTCACTCATATC	7.6	7.3	8	6.7	6.6	6.8	0.9	0.0013	0.04
MICRO.6033.C1	MICRO.6033.C1_371	AAT70491	35.2	not assigned.unknown	NOT VALIDATED AAT70491: At1g14590 [Arabidopsis thaliana]	TGCTATGCACTAGTAAGTGAAGGGGTTGATTTTTCAAAGGAAGCTTATTTCATGACTCAT	7.3	8.2	7.1	6.7	6.6	6.4	1	0.0013	0.04
MICRO.6459.C1	MICRO.6459.C1_324	BAF01235	34.9	transport.metabolite transporters at the mitochondrial membrane	NOT VALIDATED BAF01235: hypothetical protein [Arabidopsis thaliana]	CAAAATCTGTTACTGCACCTCTTGACCGTATCAAGCTCCTCATGCAGACACATGGACTAA	8.4	7.3	8.8	7.6	6.4	6.8	1.2	0.0013	0.04
MICRO.6517.C2	MICRO.6517.C2_676	AAF33670	34.22	transport.cyclic nucleotide or calcium regulated channels	NOT VALIDATED AAF33670: cyclic nucleotide-gated calmodulin-binding ion channel [Nicotiana tabacum]	CCTCTTTCACGTGTATTTGGAAGAAGCGTTTTTAATTGAAGATGCTTGGGAGATAGCAAA	6.2	6.1	5.9	6.4	7.2	6.8	-0.7	0.0013	0.04
MICRO.7320.C2	MICRO.7320.C2_509	ABO82991	27.3.99	RNA.regulation of transcription.unclassified	NOT VALIDATED ABO82991: Zinc finger, DHHC-type; Zinc finger, FYVE/PHD-type [Medicago truncatula]	CTTCGCCAGCTGACTCAGGGAATACCAGAATACGTTTCTGTAGAAAGTGCAACCAGTTAA	9	8.7	9.3	8.5	8.1	7.2	1	0.0013	0.04
PPCCH16TH	PPCCH16TH_51	NA	35.2	not assigned.unknown	NOT VALIDATED NA: NA	TCTACTACTCTTGTATCATATGATAAAGATGTATTTGAGGCAAATCAATGTACACTTCAT	7.7	8.3	7.8	9	8.9	8.6	-0.9	0.0013	0.04
047B01AF.esd	047B01AF.esd_3	NA	27.3.99	RNA.regulation of transcription.unclassified	NOT VALIDATED NA: NA	TCGAGGGACTGTGGAAACTGGGACGATGATATATACTGAGATTCCCTAATACTCGAGAGA	6.5	6.3	6.5	6.9	7.5	6.9	-0.7	0.0013	0.041
bf_arrayxxx_0035a10.t7m.scf	bf_arrayxxx_0035a10.t7m.scf_371	NA	35.2	not assigned.unknown	NOT VALIDATED NA: NA	TCTTCTTCCCAAAATCCAAAATGATCAAGCTCATCTTTAGTTCAAAGATTCACAGCATCA	8.5	8.5	8.9	8.4	6.8	7.2	1.2	0.0014	0.041
BF_CSCHXXXX_0012H03.T3M.SCF	BF_CSCHXXXX_0012H03.T3M.SCF_384	ABC55680	35.2	not assigned.unknown	NOT VALIDATED ABC55680: patatin protein group A-3 [Solanum tuberosum]	CGAACATTGGCCCTTCATATTTTCGAATTCTAGTACTGGCCAATTTTTTAGGCCCAAAAT	10.7	11.8	9.7	12.4	12.9	12.5	-1.9	0.0013	0.041
bf_ivrootxx_0026h11.t3m.scf	bf_ivrootxx_0026h11.t3m.scf_1	AAG01125	27.2	RNA.transcription	NOT VALIDATED AAG01125: BAC19.10 [Lycopersicon esculentum]	TGGAGTTGAAGTTTCACTTTTCCATCCAAAAAATTGCAGGAGATGGATTTGGACTTCGAC	7.1	7.1	7.3	6.4	6.5	6.7	0.6	0.0013	0.041
BF_LBCHXXXX_0030A12_T3M.SCF	BF_LBCHXXXX_0030A12_T3M.SCF_438	NA	35.2	not assigned.unknown	NOT VALIDATED NA: NA	ATGAGAGAGATTAGCCTTGAACAAAATCAAGAAAAGTGCTAAACTCATTGCTTTTCTTCC	7.2	8.5	7.3	8.7	9.1	8.4	-1.1	0.0014	0.041
bf_mxlfxxxx_0026c04.t3m.scf	bf_mxlfxxxx_0026c04.t3m.scf_389	NA	35.2	not assigned.unknown	NOT VALIDATED NA: NA	TTTTTTGGGTTTTTCAATCTCGGGTTGGTTCGGGTTTTTCAAATACCAAACCAAACCATT	7.2	7.3	8	6.8	6.6	6.4	0.9	0.0014	0.041
bf_mxlfxxxx_0052g05.t3m.scf	bf_mxlfxxxx_0052g05.t3m.scf_624	NA	35.2	not assigned.unknown	NOT VALIDATED NA: NA	CAAGTATCTACTGTTAATATCGGAAAAACATTGGGCGTCACGAAGGAACAAGGAAATCTT	7.7	7.8	7.7	6.8	6.8	6.8	0.9	0.0013	0.041
bf_stolxxxx_0054f11.t3m.scf	bf_stolxxxx_0054f11.t3m.scf_606	NP_566199	35.2	not assigned.unknown	NOT VALIDATED NP_566199: DCL2; ATP binding / ATP-dependent helicase/ RNA binding / double-stranded RNA binding / helicase/ nucleic acid binding / ribonuclease III [Arabidopsis thaliana]	ATGACTGCTTCCCCTATAAAGTCTAAAGCTTCTAGCACGGCAGATAGTTATTGGCAAAAG	7.7	7.7	7.2	6.9	6.7	6.7	0.8	0.0014	0.041
cSTB38J3TH	cSTB38J3TH_293	AAK52084	26.12	misc.peroxidases	NOT VALIDATED AAK52084: peroxidase [Nicotiana tabacum]	ATTGATGATCTTAGAGAAAGGATCCACTATGAGATGGGACACAGGAGATCTTGCTCTGAT	6.3	6.5	6.7	7.1	7.2	7	-0.6	0.0014	0.041
cSTE8E5TH	cSTE8E5TH_372	ABE82185	35.2	not assigned.unknown	NOT VALIDATED ABE82185: hypothetical protein MtrDRAFT_AC135801g19v1 [Medicago truncatula]	TTTCAGAGGATGGTTCTTGGCATCAGCAAGTCAGACTCAGCAGATATATGAATGAAGAAA	7.5	7.9	7.5	6.9	7.2	6.6	0.8	0.0013	0.041
MICRO.10580.C4	MICRO.10580.C4_795	CAI62049	17.8.1	hormone metabolism.salicylic acid.synthesis-degradation	NOT VALIDATED CAI62049: UDP-xylose phenolic glycosyltransferase [Solanum lycopersicum]	TGCATAATTATGTAATAATACACGAACACCACATAGGACACAAAATTGTCATGTTGGACG	8.5	8.2	9.8	6.8	7.7	7.6	1.4	0.0014	0.041
MICRO.1123.C2	MICRO.1123.C2_1921	NP_180367	1.03.13	PS.calvin cyle.rubisco interacting	NOT VALIDATED NP_180367: CPN60A; ATP binding / protein binding [Arabidopsis thaliana]	ATGTGAGCTCAGATAAAAAGTACATTGGTAGTGGGATTAGCTGTAAACTTATTCCCTCTA	10.3	10.7	10.4	11.3	11.1	11	-0.6	0.0013	0.041
MICRO.11269.C1	MICRO.11269.C1_661	AAD11808	31.4	cell. vesicle transport	NOT VALIDATED AAD11808: syntaxin-related protein Nt-syr1 [Nicotiana tabacum]	CTATATTGTGTATTTTGGGATATATTTTTTATGTGGGGAGAAGTAAGTTGGATGGGGGTC	7.6	8.1	9	7.2	7.1	6.9	1.1	0.0013	0.041
MICRO.11283.C1	MICRO.11283.C1_624	NP_001054629	29.5.11.04.02	protein.degradation.ubiquitin.E3.RING	NOT VALIDATED NP_001054629: Os05g0145000 [Oryza sativa (japonica cultivar-group)]	TATTCTGTGTCTAAATGAACCTTCAAGACTTGAGATTCCCATCAGTAAAACTGTATCTGT	8.4	8.4	8.1	8.8	9	9.1	-0.7	0.0014	0.041
MICRO.11715.C1	MICRO.11715.C1_727	NP_564622	35.1.14	not assigned.no ontology.S RNA-binding domain-containing protein	NOT VALIDATED NP_564622: RNA binding [Arabidopsis thaliana]	AGATGGTCGTGTCAATTGGAGCACCGTGACAAAAAGCATACTACCATTTAGACTGGAGAC	7.6	7.6	7.6	7.2	6.7	6.8	0.7	0.0014	0.041
MICRO.12946.C1	MICRO.12946.C1_1033	BAD88246	34.9	transport.metabolite transporters at the mitochondrial membrane	NOT VALIDATED BAD88246: mitochondrial carrier protein-like [Oryza sativa (japonica cultivar-group)]	GGGGGGAGTTGCAGGTTTTAATAAACTTTCTTGGTAAAATTTGATATGAAGTCACAGGAT	9	8.6	9.2	8.2	8.4	7.5	0.9	0.0013	0.041
MICRO.1360.C1	MICRO.1360.C1_191	NA	35.2	not assigned.unknown	NOT VALIDATED NA: NA	GGATTCTCCAAAATCAATGCGATTATGACAATATTTCTGGAGTGTCCGAGCAACATAACT	9	7.8	9.5	6.8	6.9	8.1	1.5	0.0014	0.041
MICRO.15016.C1	MICRO.15016.C1_1032	NP_001065471	34.9	transport.metabolite transporters at the mitochondrial membrane	NOT VALIDATED NP_001065471: Os10g0573700 [Oryza sativa (japonica cultivar-group)]	GGCATATGAGATGACTAGATCTAGTTTGGGATAATTGCTCCAAGGTTTTAGGACAATTGT	9.9	9.7	11	9.1	8.8	9.1	1.2	0.0013	0.041
MICRO.15057.C1	MICRO.15057.C1_746	AAM96944	20.2.1	stress.abiotic.heat	NOT VALIDATED AAM96944: small heat shock protein [Lycopersicon esculentum]	CAAGAATTGCTTTGCCTGAGAATATTGACTTTGAAAAGATTAAGGCTGAGGTTAAAGATG	10	8.5	12.4	8.2	6.5	8	2.7	0.0014	0.041
MICRO.15178.C2	MICRO.15178.C2_847	ABB89022	35.2	not assigned.unknown	NOT VALIDATED ABB89022: CXE carboxylesterase [Actinidia deliciosa]	TTGTTTTGGCAGTTGGATACAGGTTATCACCTGAGAATAGATACCCAGCTGCATTTGAGG	8.5	8	8.1	7.8	6.9	7.2	0.9	0.0013	0.041
MICRO.1666.C1	MICRO.1666.C1_1116	ABO82877	35.2	not assigned.unknown	NOT VALIDATED ABO82877: Protein of unknown function DUF1639 [Medicago truncatula]	TTATTTTCGCAAACTGGTTGCAGTTCCATGAATGTCAATGGAGGTGAACATGACAAAGGT	11.9	10.1	12.5	9.7	10.1	9.6	1.7	0.0013	0.041
MICRO.16976.C1	MICRO.16976.C1_374	ABI97349	35.2	not assigned.unknown	NOT VALIDATED ABI97349: cold-induced thioredoxin domain-containing protein [Ammopiptanthus mongolicus]	ATGTGTTGCAATAAGGCTCTTGCTATGGTGGTTATGAGTTCTTGTGGATCAACTGATCGC	10.6	11	10.2	12.1	11.6	11.4	-1.1	0.0014	0.041
MICRO.2072.C1	MICRO.2072.C1_955	CAJ80766	20.1.99	stress.biotic.misc	NOT VALIDATED CAJ80766: red chlorophyll catabolite reductase [Solanum lycopersicum]	GTAGCGAACCAGGTTTTAGGAGTACTAAGGGAAATCTACAACAGTTGAATTTCTTGCTCC	10.8	11.6	10.7	11.8	11.9	11.7	-0.8	0.0014	0.041
MICRO.2680.C1	MICRO.2680.C1_1005	NP_194914	29.4	protein.postranslational modification	NOT VALIDATED NP_194914: catalytic/ protein phosphatase type 2C [Arabidopsis thaliana]	GGACTTTATACATGAGCAGCTCAAGTCGGAAAGCAAACTTTCTGCAGTATGTGAGAGAGT	11.5	11.2	11.3	10.7	10.7	10.8	0.6	0.0014	0.041
MICRO.301.C1	MICRO.301.C1_677	NP_001050027	29.2.2	protein.synthesis.misc ribosomal protein	NOT VALIDATED NP_001050027: Os03g0334000 [Oryza sativa (japonica cultivar-group)]	GTCATGAAAGTTGTTGGCCAGGGTGCATTTGGGAAAGTATTTCAGGTTAAAAAGAAGGGT	8.9	7.9	8.3	7.3	6.2	7.7	1.3	0.0013	0.041
MICRO.3274.C4	MICRO.3274.C4_654	NA	35.2	not assigned.unknown	NOT VALIDATED NA: NA	ATAAACTGGCAAAATATGGGCCTGACCGATGACTGTTTCTGAGCCAATTGTGACAATTAA	7.4	9.8	7.2	10.2	12.9	11.4	-3.3	0.0013	0.041
MICRO.3750.C2	MICRO.3750.C2_421	NA	35.2	not assigned.unknown	NOT VALIDATED NA: NA	TAGGATTTAACTGTGCTCTAACATTCTCATGCACATCTGCCTCAGATTGATGTTTGATAC	12.6	11.8	12.8	11.8	11.6	11.3	0.8	0.0014	0.041
MICRO.3779.C2	MICRO.3779.C2_2487	NP_181342	35.2	not assigned.unknown	NOT VALIDATED NP_181342: unknown protein [Arabidopsis thaliana]	TTTACTGAATCGTTATATGTAGTACAATGTCTTCATGGTTCAGAAGTATGCGTTTTGGTC	8	8.9	7.9	9.1	9.6	9.1	-1	0.0014	0.041
MICRO.4562.C3	MICRO.4562.C3_79	AAQ19680	20.2.1	stress.abiotic.heat	NOT VALIDATED AAQ19680: chloroplast small heat shock protein class I [Capsicum frutescens]	ATTCCAAGCTTCTTCGGTGGTCGTAAGAAGCAACATCTTCGACCCATTTTCCCTTGACTT	15.6	12.8	15.8	12.9	12.5	12.6	2.1	0.0014	0.041
MICRO.4848.C3	MICRO.4848.C3_15	ABD33017	26.19	misc.plastocyanin-like	NOT VALIDATED ABD33017: Blue (type 1) copper domain [Medicago truncatula]	CAAGCTTAGTACTGTAACTATTATCTCTTTTTCTTTTTCTAACCAAAATGGGTGCTAGGG	8.3	8.9	7.8	9.6	9.4	9.6	-1.2	0.0013	0.041
MICRO.501.C1	MICRO.501.C1_1147	NP_564341	27.2	RNA.transcription	NOT VALIDATED NP_564341: NRPA2; DNA binding / DNA-directed RNA polymerase [Arabidopsis thaliana]	TTGGACCTGTTTATTATCAGCGTCTGCGACACATGGTTTCTGATAAATTTCAGGTCCGTT	8.1	8.1	8	7.8	7	6.4	1	0.0014	0.041
MICRO.5480.C1	MICRO.5480.C1_1248	NP_563770	3.5	minor CHO metabolism.others	NOT VALIDATED NP_563770: aldo-keto reductase/ oxidoreductase [Arabidopsis thaliana]	AAAGTGGTACTAATAAAGCTGCTGCAACAACATCGTACGTACTCCATGCAATTTCATAAG	7.3	7.4	7.7	8.4	8.9	8	-1	0.0013	0.041
MICRO.6105.C2	MICRO.6105.C2_892	NP_054526	1.01.01.02	PS.lightreaction.photosystem II.PSII polypeptide subunits	NOT VALIDATED NP_054526: photosystem II 47 kDa protein [Nicotiana tabacum]	GACATAGGGTACCAGAGAAATCTTTATTTGAATCAACTTCGTTTTTACTCTTGTTCGTTC	11.2	11	10.3	12.1	11.6	13.3	-1.5	0.0013	0.041
MICRO.622.C1	MICRO.622.C1_1538	NP_683575	35.2	not assigned.unknown	NOT VALIDATED NP_683575: unknown protein [Arabidopsis thaliana]	CACTCCCTAGTGAGATAACTTTGATGATAACAAGATGCTCATTTTTCTTGAAAATTCCCT	10.2	10.6	10	10.9	11.1	10.8	-0.7	0.0014	0.041
MICRO.6908.C1	MICRO.6908.C1_875	NP_195311	30.5	signalling.G-proteins	NOT VALIDATED NP_195311: ATGB2 (GTP-BINDING 2); GTP binding [Arabidopsis thaliana]	TCAGAGTAAAATAGGTTCTTATGGAGCTGTTAATTCCAGTACATGTGATGTTTGAGTTAC	12.3	11.4	12.3	11	11.2	11.1	0.9	0.0014	0.041
MICRO.7886.C3	MICRO.7886.C3_848	NA	35.2	not assigned.unknown	NOT VALIDATED NA: NA	AGTTCTGACTCGAAACCTTTAGTTAAAAATAAAGGTATCGTGATATCACTTATGGAGTGG	10.9	9.1	11.1	8.3	7.8	9	2	0.0014	0.041
MICRO.8332.C2	MICRO.8332.C2_781	AAN31931	34.3	transport.amino acids	NOT VALIDATED AAN31931: unknown protein [Arabidopsis thaliana]	TCTTTCTCAGTGTGTATTAGCTGCTAGTGTTTCAAGTAGAAAGTATCTGTTGCATTATAG	9.1	10.5	9.2	11.8	11.8	10.9	-1.9	0.0013	0.041
MICRO.8726.C1	MICRO.8726.C1_735	AAG49032	33.99	development.unspecified	NOT VALIDATED AAG49032: ripening regulated protein DDTFR18 [Lycopersicon esculentum]	AAATAATAGAAAGATGCTTTGTTTGTTACAGGGGTTGCTGTTGGTTCAGGGTGGCAATCA	10	10.1	9.6	9	9.1	9.2	0.8	0.0014	0.041
MICRO.9389.C1	MICRO.9389.C1_676	Q03666	26.09	misc.glutathione S transferases	NOT VALIDATED Q03666: Probable glutathione S-transferase (Auxin-induced protein PCNT107)	TCTGGATTAGAATAAACATGTTTCATTTGCTTCATATACACGAAAGGCACTTAGTTCTGC	11.4	9.5	11.2	8.5	8.2	8.9	2.1	0.0014	0.041
POADV60TV	POADV60TV_560	ABE80317	35.1	not assigned.no ontology	NOT VALIDATED ABE80317: Esterase/lipase/thioesterase [Medicago truncatula]	TTCTCATGGATCGAGCTTAAACAAGTAAAAGAGGCATCTATTCATGAGGATCCATGTGTA	9.4	9.9	9.2	10.3	10.1	10.2	-0.7	0.0014	0.041
POCBU64TP	POCBU64TP_657	XP_028217	35.2	not assigned.unknown	NOT VALIDATED XP_028217: PREDICTED: hypothetical protein [Homo sapiens]	GTTGGAGCTTTTGGGGGGAATTATGAAGAAATCTGAATAAATTTCTCACCCTTCCCAAAA	6.5	6.6	6.6	7.1	7.4	7	-0.6	0.0014	0.041
SDBN003C13u.scf	SDBN003C13u.scf_41	NA	35.1	not assigned.no ontology	NOT VALIDATED NA: NA	GAGCTTCATGTACTACAATTTCGACCTCGATGAAGTGCTTCATGTCCAATGTGCACTTAA	9.4	10.8	9.3	11.2	11.2	11.5	-1.4	0.0014	0.041
SDBN005L14u.scf	SDBN005L14u.scf_339	NP_188410	35.2	not assigned.unknown	NOT VALIDATED NP_188410: heat shock protein binding / unfolded protein binding [Arabidopsis thaliana]	AGGAGTGGTGAAAACACAGAAAACGCCTTTTGGAATCATGTCTCAGGTATCTACATGCTT	9.9	9	9.2	8.4	8.5	8.5	0.9	0.0014	0.041
STDB003K04u.scf	STDB003K04u.scf_319	NP_189325	13.1.6.1.5	amino acid metabolism.synthesis.aromatic aa.chorismate.shikimate kinase	NOT VALIDATED NP_189325: ATP binding / shikimate kinase [Arabidopsis thaliana]	CTGGTATTGTGAGAGTAATTCTTAATTGGCGTGTTATTGTGAGTATTGTAAATGTTGCAC	8.8	9.2	8.8	9.6	9.5	9.8	-0.7	0.0014	0.041
STDB005N18u.scf	STDB005N18u.scf_1	AAT39932	35.2	not assigned.unknown	NOT VALIDATED AAT39932: NB-ARC domain containing protein [Solanum demissum]	TCTTGATGAAGATGGAGTGAATTTGGGTGAGGATTCTCTTGATGAAGATGAGGAAGACAA	9.1	10.2	8.8	10.1	10.7	10.9	-1.2	0.0014	0.041
STMHF47TV	STMHF47TV_64	CAA09882	35.2	not assigned.unknown	NOT VALIDATED CAA09882: ER auxin binding protein 1 [Solanum lycopersicum]	ACAAATGTAAAAAGCTCCGGTTCACCGTTCATCACTAGTGGATCTTTCTGGACGTTTTCT	7.8	7.3	7.5	7.9	8.6	8.2	-0.7	0.0013	0.041
TBSK02757FF09.t3m.scf	TBSK02757FF09.t3m.scf_151	NA	35.2	not assigned.unknown	NOT VALIDATED NA: NA	AGAGTTTGCTAAAAACTTATAACAGCAGCAAGAGGCAGCTCACCTGGGGTATCCTACAAG	11.2	11.7	10.1	12.1	12.5	12.4	-1.3	0.0014	0.041
TBSK02955FG03.t3m.scf	TBSK02955FG03.t3m.scf_61	AAM21642	35.2	not assigned.unknown	NOT VALIDATED AAM21642: putative Kunitz-type proteinase inhibitor [Solanum tuberosum]	ACACCCGTTAGATTCATTGGTTCAACTAGTCATTTCGGCACAATGTATCTGTGACAATGA	13.7	14.8	12.8	15.4	15.4	15.6	-1.7	0.0014	0.041
131E01AF.esd	131E01AF.esd_166	NP_568094	29.5.11.04.03.02	protein.degradation.ubiquitin.E3.SCF.FBOX	NOT VALIDATED NP_568094: ubiquitin-protein ligase [Arabidopsis thaliana]	CCTTTCCAGCTTAAAGCTAGGGATCTGTCTGAACATAACCGATCAGGGTCTTATCCACAT	8.2	8.6	8.5	8	6.9	7.4	1	0.0014	0.042
bf_acdcxxxx_0046g12.t3m.scf	bf_acdcxxxx_0046g12.t3m.scf_1	NA	29.5.11.20	protein.degradation.ubiquitin.proteasom	NOT VALIDATED NA: NA	GTTTAATTTGCTGAACGTTGCTCTTTGCGACTGAGATCCATTTACTAACATGGTGGCAAC	10.8	10.7	10.7	10.4	10.2	10.2	0.5	0.0015	0.042
bf_arrayxxx_0015d01.t7m.scf	bf_arrayxxx_0015d01.t7m.scf_731	ABN09011	34.2	transporter.sugars	NOT VALIDATED ABN09011: General substrate transporter; Sugar transporter superfamily [Medicago truncatula]	ATCACACCTTGCTACTGCCCATTTGGTTTCTTCAAATAGTACTCCGTATTGTCTAAAAAA	8.6	9.8	8.7	10	10.7	9.9	-1.2	0.0015	0.042
bf_arrayxxx_0053e04.t3m.scf	bf_arrayxxx_0053e04.t3m.scf_206	NA	35.2	not assigned.unknown	NOT VALIDATED NA: NA	AATCAACGGATTATCATTGAAGTAATTAAGCAGTCACTTGTCAGTGGATAATTAGGGTTC	6.9	7	6.8	7.8	7.9	7.1	-0.8	0.0015	0.042
bf_arrayxxx_0080h03.t3m.scf	bf_arrayxxx_0080h03.t3m.scf_213	NA	35.2	not assigned.unknown	NOT VALIDATED NA: NA	GGGGCATCCAAAACTTCCACGGGGCCCAGGGACCTGCTACTTCACCTAGAATGAAACGAT	8.8	8.9	8.8	7.7	6.9	8.6	1.1	0.0015	0.042
bf_cswbxxxx_0027h01.t3m.scf	bf_cswbxxxx_0027h01.t3m.scf_424	NA	35.2	not assigned.unknown	NOT VALIDATED NA: NA	AGGGGAATGGTTAATAAGTTGTAATGTTTTGCCTTCGACCTATTAAAAGGTGAACAATTC	7.9	8.9	7.8	7.3	6.9	6.7	1.2	0.0014	0.042
bf_cswbxxxx_0063c04.t3m.scf	bf_cswbxxxx_0063c04.t3m.scf_64	NA	35.2	not assigned.unknown	NOT VALIDATED NA: NA	CTTTGGGAAGTATTTGTTGTATTCGGAAGCTTGTGAAGGTTGTGGATGTAGATTTTGTTG	9.1	9.9	9.2	10.4	10.3	10.2	-0.9	0.0015	0.042
bf_cswcxxxx_0007b05.t3m.scf	bf_cswcxxxx_0007b05.t3m.scf_147	P08454	20.1.07.06	stress.biotic.PR-proteins.proteinase inhibitors	NOT VALIDATED P08454: Wound-induced proteinase inhibitor 1 precursor (Wound-induced proteinase inhibitor I) (Chymotrypsin inhibitor I, D subunit)	TTGGTGTACCAACAAAGCTTGCTTAAGGGAAATTATTGAGAAGGAAAATTCACTCAATAC	14.5	15.5	14.5	15.8	15.9	15.9	-1	0.0014	0.042
BF_LBCHXXXX_0008E09_T3M.SCF	BF_LBCHXXXX_0008E09_T3M.SCF_247	CAA59450	26.02	misc.UDP glucosyl and glucoronyl transferases	NOT VALIDATED CAA59450: twi1 [Solanum lycopersicum]	TTGATCATTACCTTTTGTCACCACTTCTAATAATTAATGACTTCAAAAAGAATATTTCAA	10.3	8.7	13.6	7.3	7.2	8.3	3.3	0.0014	0.042
bf_mxflxxxx_0047h04.t3m.scf	bf_mxflxxxx_0047h04.t3m.scf_515	EAY85443	35.2	not assigned.unknown	NOT VALIDATED EAY85443: hypothetical protein OsI_006676 [Oryza sativa (indica cultivar-group)]	TCATCTGGAAAGTTAGGGATAGCCATGACGGGCTCTATTACTACAACGTAACATGGCACA	8.8	9.1	8.7	9.3	9.9	9.4	-0.7	0.0015	0.042
bf_suspxxxx_0052e05.t3m.scf	bf_suspxxxx_0052e05.t3m.scf_492	NP_201390	35.1	not assigned.no ontology	NOT VALIDATED NP_201390: ACR1 [Arabidopsis thaliana]	GCATGGACACATAACAAGCGAGCAGCCTGCATTGTTTACATGGAAGATGATCTGAAGCAT	10.7	9	9.6	9.1	6.7	6.8	2.3	0.0014	0.042
BPLI12E23TH	BPLI12E23TH_372	AAO61489	4.14	glycolysis.PEPCase	NOT VALIDATED AAO61489: phosphoenolpyruvate carboxylase kinase 1 [Solanum tuberosum]	AGAGAGAAAATTGAAACTTGCTGATTGTGGATCGGCAGTAACGATGTGCTAGATGTGAAT	6.1	6.5	6.4	6.7	7.6	7.9	-1	0.0014	0.042
cPRO1C12TH	cPRO1C12TH_529	NA	10.5.2	cell wall.cell wall proteins.proline rich proteins	NOT VALIDATED NA: NA	ATTCATTTTCCCATTAGTTATCACTACTTGGTTTTGTGTAATCTCATGTGGCTTATGCAC	6.7	7	6.5	7.4	7.2	7.6	-0.7	0.0015	0.042
cSTB28H21TH	cSTB28H21TH_31	ABJ91212	29.4	protein.postranslational modification	NOT VALIDATED ABJ91212: CBL-interacting protein kinase 4 [Populus trichocarpa]	GTTGTGTGGTTGTGGTACAAATAAACCATCTTGAGATTCCATTGGAAGAGTAAAAGTTCT	7.3	7.3	7.3	6.8	7	6.8	0.5	0.0015	0.042
cSTB34P8TH	cSTB34P8TH_268	BAB08924	34.9	transport.metabolite transporters at the mitochondrial membrane	NOT VALIDATED BAB08924: carnitine/acylcarnitine translocase-like protein [Arabidopsis thaliana]	CATATTCTCTTGTGATGATAAGATCTAGAATTGCCTTGCACAATTGGTCGTTGGTCACCC	6.7	6.5	6.4	6.7	7.8	7.7	-0.8	0.0015	0.042
cSTB38O7TH	cSTB38O7TH_346	NA	35.2	not assigned.unknown	NOT VALIDATED NA: NA	GAAGAAGTTGAATCTTTCTTACGAAGATGAGGCTTGTCTGGAAGGTACTTGTTCACTAAG	8	7.9	7.5	7.3	7.1	7.1	0.7	0.0014	0.042
cSTB47M21TH	cSTB47M21TH_150	P14278	1.01.01.01	PS.lightreaction.photosystem II.LHC-II	NOT VALIDATED P14278: Chlorophyll a-b binding protein 4, chloroplast precursor (LHCII type I CAB-4) (LHCP)	GACGTACAGTTAAAAGCGCTCCTCAAAGCATCTGGTATTTATTGTTTGAAATATTTCTAC	10.8	12	9.8	12.7	12.1	13.4	-1.9	0.0014	0.042
MICRO.10172.C1	MICRO.10172.C1_530	AAX27955	29.2.1.99	protein.synthesis.chloroplast/mito - plastid ribosomal protein.unknown	NOT VALIDATED AAX27955: unknown [Schistosoma japonicum]	TCTTCGTTGTAATGTTCTTGTGTCCTGTTAAACTATGCATGTGGTTCTAGCAACCTTCAG	8.4	8.5	8.3	9.5	9.5	8.8	-0.9	0.0014	0.042
MICRO.10220.C1	MICRO.10220.C1_1230	NP_201137	27.3.52	RNA.regulation of transcription.Global transcription factor group	NOT VALIDATED NP_201137: unknown protein [Arabidopsis thaliana]	CCCACTGTGTTGCTGTATCATAGTATTCAGAAATATGTGGTAGGTTTAGTAACATGAATC	11.8	11.3	12	11	11.2	10.6	0.8	0.0014	0.042
MICRO.1036.C8	MICRO.1036.C8_41	Q41228	1.01.02.02	PS.lightreaction.photosystem I.PSI polypeptide subunits	NOT VALIDATED Q41228: Photosystem I reaction center subunit IV A, chloroplast precursor (PSI-E A) [Contains: Photosystem I reaction center subunit IV A isoform 2]	CCCCAAAATTCTCAGAAACAAAGTAAGAAAATTAAAGCATATGGCAAGTTGTAACATGGC	7.6	7.9	6.9	8.9	8.6	8.7	-1.3	0.0015	0.042
MICRO.10553.C1	MICRO.10553.C1_1560	CAJ44458	27.4	RNA.RNA binding	NOT VALIDATED CAJ44458: ALY protein [Nicotiana benthamiana]	TTCAGTTGGATGGGAAACCTATGAAGATAGAAATTGTCGCTCCCAAGCCGGACATTCCTT	12.5	11.3	12.2	10.8	10.8	11.4	1	0.0015	0.042
MICRO.10569.C1	MICRO.10569.C1_700	NP_567015	27.1.1	RNA.processing.splicing	NOT VALIDATED NP_567015: nucleic acid binding [Arabidopsis thaliana]	ACAATTTCATGGTTGGTGATGTGGTCTCTTGCTTGCAAAAGGCATCACTTATTCCCAGAG	9.6	9.3	9.1	9	8.3	8.2	0.8	0.0015	0.042
MICRO.11056.C1	MICRO.11056.C1_437	NP_568697	35.2	not assigned.unknown	NOT VALIDATED NP_568697: unknown protein [Arabidopsis thaliana]	AATTGGCTGCACAAGGAGTGATTGGGAAAAGAGTTGATGAAATGGAGTCCGGGTTCATGA	9.7	8.6	8.8	7.2	6.7	8.5	1.6	0.0014	0.042
MICRO.12493.C1	MICRO.12493.C1_848	NP_200618	35.2	not assigned.unknown	NOT VALIDATED NP_200618: unknown protein [Arabidopsis thaliana]	CGCATGGGGAAAAGAGTCAAATATGGATACAGGCAAAGGGGTATCCGAAAGCGAAATTAA	7.2	7.5	6.8	6.6	6.4	6.5	0.7	0.0015	0.042
MICRO.13002.C1	MICRO.13002.C1_604	NP_201323	29.5.11.04.02	protein.degradation.ubiquitin.E3.RING	NOT VALIDATED NP_201323: ubiquitin-protein ligase [Arabidopsis thaliana]	AAACTCGGTACTGAGTTCAACTCAATCAACCGAGTTCTGAATTTTGGATCGAGTAGTAAA	7.7	7.9	7.8	7.5	6.5	6.7	0.9	0.0015	0.042
MICRO.13089.C1	MICRO.13089.C1_377	CAB37549	35.2	not assigned.unknown	NOT VALIDATED CAB37549: putative protein [Arabidopsis thaliana]	GTCTTCGTTCTGTAATTAGGAGTCGTTATAGGAGAGTCGAGACACAAGCATGAGAGTGGT	8.8	8.5	9.1	8.3	8.2	7.8	0.7	0.0014	0.042
MICRO.13172.C1	MICRO.13172.C1_677	AAK60564	35.2	not assigned.unknown	NOT VALIDATED AAK60564: armadillo repeat-containing protein [Nicotiana tabacum]	TGGAGCCCTTTGCCGTTTTACTGTCCAACAAATCCAGAAATACAAACACAAGTTGCTGAA	8.6	8.2	8.8	6.8	7.8	7.5	1.1	0.0015	0.042
MICRO.13327.C1	MICRO.13327.C1_323	NP_564963	35.2	not assigned.unknown	NOT VALIDATED NP_564963: unknown protein [Arabidopsis thaliana]	AAATTCCTGTCAAAGCTTACTTCCTTTCCACGAGTATTGATTTGAAGCGCATGCAAGCTG	7.8	8	8.4	7	6.9	7.4	1	0.0014	0.042
MICRO.13580.C1	MICRO.13580.C1_700	NA	35.2	not assigned.unknown	NOT VALIDATED NA: NA	AGAGTTGTGACCTTTACCCTTTGTTGGCTATAAATAGAGAGATTTTCTCTCATTTTTCTG	9.2	8.3	10	8.2	8.4	7.4	1.2	0.0015	0.042
MICRO.15019.C1	MICRO.15019.C1_602	ABO82277	35.1	not assigned.no ontology	NOT VALIDATED ABO82277: RNA-binding region RNP-1 (RNA recognition motif) [Medicago truncatula]	GGTTTTTGAAGCGGGAATTTTCCGCTTCAACAGACCTTTAAAGCCAGTGAAACTTTGTTT	8.7	8.9	8.7	8.6	7.3	7.2	1.1	0.0014	0.042
MICRO.153.C1	MICRO.153.C1_1861	CAB08077	10.8.01	cell wall.pectin*esterases.PME	NOT VALIDATED CAB08077: pectinesterase [Solanum lycopersicum]	AAATGACCTTAGCTCAAGGTCGCATTCTTTCTTCAATTCCACGAAAACATTATATTTGGT	9.1	7.8	10.9	7.6	7.4	6.4	2.1	0.0014	0.042
MICRO.15433.C1	MICRO.15433.C1_681	ABN04850	35.1	not assigned.no ontology	NOT VALIDATED ABN04850: Protein NAP1 , putative [Medicago truncatula]	ATAATCTGGAGGCTGTTGCTGGAAGCATGCATTCTGGTGACCGAATAGATAGAGACACAA	7.5	6.9	7.3	7.8	8	8	-0.7	0.0014	0.042
MICRO.15915.C1	MICRO.15915.C1_713	ABE81574	21.02.1	redox.ascorbate and glutathione.ascorbate	NOT VALIDATED ABE81574: Haem peroxidase, plant/fungal/bacterial [Medicago truncatula]	GTTGAGAAATATGCTGCTGATGAAGATGCTTCTTTGCTGATTATGCCGAAGCTCATCAGA	14.9	13.6	14.5	13.5	13.3	13	1.1	0.0015	0.042
MICRO.17478.C1	MICRO.17478.C1_101	Q7XA40	20.1.02	stress.biotic.receptors	NOT VALIDATED Q7XA40: Putative disease resistance protein RGA3 (RGA1-blb) (Blight resistance protein B149)	CACCTAACAGCCCTCACAAGATTAAAAATTAGGGGATGTCCAGAAGTGTTCAAGCGGTGT	7.7	8.2	7.6	8.3	9	9.3	-1	0.0014	0.042
MICRO.1818.C1	MICRO.1818.C1_940	NP_564344	35.2	not assigned.unknown	NOT VALIDATED NP_564344: unknown protein [Arabidopsis thaliana]	CACTAGCAATTATGGCCTTTGCCGGTGATCAAGCTCAAAACATCCATTACACTCCCAATT	9.7	11	9.5	11.3	11.6	11.7	-1.5	0.0015	0.042
MICRO.2385.C7	MICRO.2385.C7_554	Q9M5L0	29.2.2	protein.synthesis.misc ribosomal protein	NOT VALIDATED Q9M5L0: 60S ribosomal protein L35	TGTATTGTGAAGCGGAAACTTTTGTTTATTTTCTCATGTTTCAGTGAAGGTTCTTCAGTC	11	11.8	11.5	12	12.5	12.1	-0.8	0.0014	0.042
MICRO.3026.C1	MICRO.3026.C1_991	NP_187006	35.2	not assigned.unknown	NOT VALIDATED NP_187006: unknown protein [Arabidopsis thaliana]	TCAACTTCCAAGTGGTTCTATGGGTATGAATGAATATCCAGCCTTTAAACAGTACATTGA	8.1	7.7	8.1	7.4	6.7	7.3	0.8	0.0014	0.042
MICRO.3154.C3	MICRO.3154.C3_519	ABE84254	17.5.3	hormone metabolism.ethylene.induced-regulated-responsive-activated	NOT VALIDATED ABE84254: Universal stress protein (Usp) [Medicago truncatula]	TGAGCAACCACTGCGCGGCAGAATGTGAAGTGTCCAGTTCTAATTGTGAAAAAAGCCAAA	15.8	14.7	15.9	13.4	12.4	13.6	2.3	0.0015	0.042
MICRO.3418.C1	MICRO.3418.C1_848	ABE83681	35.1	not assigned.no ontology	NOT VALIDATED ABE83681: Alcohol dehydrogenase superfamily, zinc-containing [Medicago truncatula]	CTATCTGCTGCTGTTTCAAGGACCTGCAAATTTGAAGACGCTCCACAGGCATACAAAGAT	12.5	12	12.3	11.5	11.6	11.8	0.6	0.0015	0.042
MICRO.4177.C7	MICRO.4177.C7_531	CAA43590	1.01.01.01	PS.lightreaction.photosystem II.LHC-II	NOT VALIDATED CAA43590: Type I (26 kD) CP29 polypeptide [Solanum lycopersicum]	CTTTTTGGACTGGAGGAATTGTACAATTTCTGCAATACATTTCAGAGCTGTATGTGAAAA	11.1	10.6	10	12.6	11	12.8	-1.6	0.0015	0.042
MICRO.4647.C1	MICRO.4647.C1_1386	NP_569014	27.3.06	RNA.regulation of transcription.bHLH,Basic Helix-Loop-Helix family	NOT VALIDATED NP_569014: DNA binding / transcription factor [Arabidopsis thaliana]	TCTCATCAAAGTGAGAGGTTGTAGTAGATTGTTGTGATTTTTCTCATCCAAAACAATGAC	10.9	8.2	12.7	7	6.7	6.9	3.7	0.0014	0.042
MICRO.4901.C1	MICRO.4901.C1_975	BAD43135	29.5	protein.degradation	NOT VALIDATED BAD43135: unknown protein [Arabidopsis thaliana]	GGTTGAATGAAGAGATGATGTATAGAAATCATGACATGGTGACATGTATATTTGTTTGGC	7.4	6.4	7.3	8.4	8.6	7.9	-1.3	0.0014	0.042
MICRO.5268.C1	MICRO.5268.C1_720	O04973	13.1.4.4	amino acid metabolism.synthesis.branched chain group.leucine specific	NOT VALIDATED O04973: 2-isopropylmalate synthase A (Alpha-isopropylmalate synthase A) (Alpha-IPM synthetase A)	TTGGGAGAAGTTATTAAAGCTGGTGCACAACACTTAACATACCTGATACTGGTGGATACA	7.6	7.8	7.3	7.1	6.8	7	0.6	0.0015	0.042
MICRO.5438.C1	MICRO.5438.C1_460	ABE80372	35.2	not assigned.unknown	NOT VALIDATED ABE80372: Protein of unknown function DUF298 [Medicago truncatula]	GCTTCTTCGTTTCAGAGAAAATGGACAAAAGAACATCACTATTAGCCAAGCTTGTACTGG	7.1	7.6	7.2	6.6	6.8	6.8	0.6	0.0015	0.042
MICRO.5510.C1	MICRO.5510.C1_1517	AAK32940	29.1	protein.aa activation	NOT VALIDATED AAK32940: AT3g55400/T22E16_60 [Arabidopsis thaliana]	CCGTTGATTCAGATATTGCGGCAGAAGAAACGAATTCAGGGCTGCAATGGAAAAACTGGT	7.6	7.7	7.5	7.2	6.9	6.1	0.8	0.0015	0.042
MICRO.623.C3	MICRO.623.C3_1278	NP_568606	17.1.1	hormone metabolism.abscisic acid.synthesis-degradation	NOT VALIDATED NP_568606: unknown protein [Arabidopsis thaliana]	TACGTTTGTGCTCAACGATTGGAGAGTAGTTCATTATTCCTTGTGTTAAGGTGGGAAAAT	9.8	9.7	10.1	9.6	8.9	9	0.7	0.0014	0.042
MICRO.6273.C1	MICRO.6273.C1_262	ABN05735	27.3.99	RNA.regulation of transcription.unclassified	NOT VALIDATED ABN05735: Homeobox domain, ZF-HD class; ZF-HD homeobox protein Cys/His-rich dimerisation region; Homeodomain-like [Medicago truncatula]	CTGCCTCTGCCTGTCGTTGTAGTTTACAAAGAATGTCTAAAAAATCATGCTGCCACTATG	9.7	8.8	10.1	8.8	6.5	6.9	2.1	0.0015	0.042
MICRO.6358.C1	MICRO.6358.C1_483	NP_194380	35.1	not assigned.no ontology	NOT VALIDATED NP_194380: EMB1374; transcription regulator [Arabidopsis thaliana]	TGATTCTGAGAAAAATGTTGTATTTGAGGCTGATTCTGATTCGGTACTTACTAAAGGTCT	9.9	8.8	10.1	8.4	8.2	8.8	1.1	0.0014	0.042
MICRO.6409.C1	MICRO.6409.C1_1090	EAY97648	35.2	not assigned.unknown	NOT VALIDATED EAY97648: hypothetical protein OsI_018881 [Oryza sativa (indica cultivar-group)]	AATTAGCAAAGATTGCAAGGGCAATTTTGTTTGATCATCTTTTGTAGTGTTTCCTGATCC	7.7	7.3	7.7	6.5	6.8	6.4	1	0.0015	0.042
MICRO.6837.C2	MICRO.6837.C2_658	ABE92350	35.2	not assigned.unknown	NOT VALIDATED ABE92350: Protein of unknown function DUF516 [Medicago truncatula]	GTGTAATTTTTCAAAGAAAGTTCAGATGAATCCCTTGTCCCGATCTATCTAGTACTTTCA	9.6	7.6	10.1	7.9	7.3	6.6	1.9	0.0015	0.042
MICRO.6935.C1	MICRO.6935.C1_1435	NP_849842	29.5.09	protein.degradation.AAA type	NOT VALIDATED NP_849842: ATP binding / ATPase/ nucleoside-triphosphatase/ nucleotide binding [Arabidopsis thaliana]	GTGTGACATTTGCTGATATTGGTGCTTGGATGACTCAAAGAATTCTTCTTCAGGAGTTGG	9.3	7.9	8.2	7.5	7.5	6.7	1.2	0.0015	0.042
MICRO.7090.C2	MICRO.7090.C2_731	AAD38245	35.2	not assigned.unknown	NOT VALIDATED AAD38245: Hypothetical Protein [Arabidopsis thaliana]	GTGTCCTATCCGATCCAATGTTCTTCTAACAACCTCATAATAAAGTTTTTGACTTTGGAT	7.5	7.2	7.2	8	8.2	7.9	-0.8	0.0014	0.042
MICRO.712.C1	MICRO.712.C1_3	NA	35.2	not assigned.unknown	NOT VALIDATED NA: NA	GAGTTGAAGAACTGGTCTGAAGAACTGAATAGATGAAGAACTGAAGTCGAAGAACTGATT	8.2	7.8	8.1	7.6	6.6	6.9	1	0.0015	0.042
MICRO.834.C1	MICRO.834.C1_1097	BAE71236	34.9	transport.metabolite transporters at the mitochondrial membrane	NOT VALIDATED BAE71236: putative ADP,ATP carrier-like protein [Trifolium pratense]	TGGAATGTACGATTCACTTAAACCAGTACTTCTAGTTGGTGACATGCAGGATAGTTTTTT	10.8	11.7	10.2	12.2	11.9	12	-1.2	0.0015	0.042
MICRO.8713.C2	MICRO.8713.C2_1944	CAA93316	34.13	transport.peptides and oligopeptides	NOT VALIDATED CAA93316: nitrite transporter [Cucumis sativus]	GTACCAAAAATAAAGGTTGAAACTATTTCTCCCTCTGTCTCAATTGATGTGACACATTTC	10.1	10.4	9.1	10.7	11.8	11.7	-1.5	0.0014	0.042
MICRO.89.C2	MICRO.89.C2_1921	ABE93659	29.2.3	protein.synthesis.initiation	NOT VALIDATED ABE93659: Translation initiation factor IF5; eIF4-gamma/eIF5/eIF2-epsilon [Medicago truncatula]	TGCTGCAAACTCATGGGAGGCTCCTTTTCTCAGAGTCTCTGGCCTTCATTTTAATGTCTT	12.6	10.7	12.5	10.9	10.3	10	1.5	0.0015	0.042
MICRO.9757.C1	MICRO.9757.C1_351	NP_849649	35.1	not assigned.no ontology	NOT VALIDATED NP_849649: pyridoxal phosphate binding [Arabidopsis thaliana]	GGAATTTGCAGAGCAATAAAGTGAAGCCACTTTTAACTGGAGTGCCAAATCTTGCTATGG	9.9	9.7	10	9.2	8.9	9.1	0.8	0.0015	0.042
SDBN001O19u.scf	SDBN001O19u.scf_448	ABE78791	13.1.7	amino acid metabolism.synthesis.histidine	NOT VALIDATED ABE78791: ATP phosphoribosyltransferase [Medicago truncatula]	TGCTTAAACGTGATATTTGCCCATGCTGAACCAGAAAAAAGTGCCCTTGTTCATTCTACT	9.7	10.6	9.6	10.7	10.9	11	-0.9	0.0015	0.042
SSBN003B03u.scf	SSBN003B03u.scf_285	NA	27.3.59	RNA.regulation of transcription.Methyl binding domain proteins	NOT VALIDATED NA: NA	AATCCACCAGAGAGTGTGAGCTGGGTTCAGACTGATTCTAATGAAGATACGTGGAAACCT	6.5	6.7	7	7.5	7	7.7	-0.7	0.0015	0.042
STMCH15TV	STMCH15TV_536	NA	35.2	not assigned.unknown	NOT VALIDATED NA: NA	GTTGACAGGTTGAAGTTGAAGAGCTTCTCTATATGTAACAAAATGTCCAAATGTTTTTCC	8.3	8.1	8.2	9	8.8	8.8	-0.7	0.0014	0.042
STMCH29TV	STMCH29TV_165	NA	35.2	not assigned.unknown	NOT VALIDATED NA: NA	GAAACTAAAGCTTTACATGTTCATAGAGCCGCTTAGCAGGTTAGCGATTCTATTTTCTCT	10.4	10.1	10.6	9.6	9.7	9.8	0.7	0.0015	0.042
ACDA04454D02.T3m.scf	ACDA04454D02.T3m.scf_361	NA	35.2	not assigned.unknown	NOT VALIDATED NA: NA	AACATGCAGGTGATGCACAGCGGGGGAACCAGCTCTAAATACTTTAATGTCTCTAGGATA	7.1	6.9	6.8	7	8.1	8.4	-0.9	0.0016	0.043
bf_arrayxxx_0063a08.t3m.scf	bf_arrayxxx_0063a08.t3m.scf_633	NA	35.2	not assigned.unknown	NOT VALIDATED NA: NA	CCATACTCTGAACCCTTGAAGGCCGTTCACTGTTACATATTATCAACATTACTCGTATGA	11	9.8	13	9.4	8.4	9.4	2.2	0.0015	0.043
bf_arrayxxx_0067f01.t7m.scf	bf_arrayxxx_0067f01.t7m.scf_133	NA	8.1.04	TCA / org. transformation.TCA.IDH	NOT VALIDATED NA: NA	CAAGCTATTTGCCAATTTGCAGTTGTACACATAGCTTAGTGTTGTTTTTTAATATCAATC	11.2	11.3	11.5	10	10.3	10.7	1	0.0015	0.043
bf_cswbxxxx_0042b01.t3m.scf	bf_cswbxxxx_0042b01.t3m.scf_85	NA	35.2	not assigned.unknown	NOT VALIDATED NA: NA	GTGTCGTGCACTCAAAAATGATGTTTGCTTTATCCTGAAATTTTATGCTGAAGTTTGATC	6.4	6.3	6.4	7.1	7.1	6.8	-0.6	0.0015	0.043
BF_LBCHXXXX_0048B09_T3M.SCF	BF_LBCHXXXX_0048B09_T3M.SCF_101	NA	28.1	DNA.synthesis/chromatin structure	NOT VALIDATED NA: NA	CGATTTGGCAGTTAAAGAGCTTAGACCAGCACTAAGGATATTGTTTGGACATCATCTACA	10.4	11.9	10.1	11.9	12.3	11.9	-1.2	0.0016	0.043
BF_LBCHXXXX_0054B11_T3M.SCF	BF_LBCHXXXX_0054B11_T3M.SCF_386	NA	35.2	not assigned.unknown	NOT VALIDATED NA: NA	CGCCATGGCCCATTTGTTTATCGTGTCAGTGGCCTCCTTATTGACAGCAGCAGCGCGCAT	6.2	6.5	5.9	6.7	7.6	6.9	-0.9	0.0015	0.043
bf_mxflxxxx_0042h08.t3m.scf	bf_mxflxxxx_0042h08.t3m.scf_224	NA	35.2	not assigned.unknown	NOT VALIDATED NA: NA	AGGTATGTATCAGTCACTTAGATTCATTAATAGATGAGACCAATGGATCAAAACCCTCCT	8.2	7.9	8.4	7.5	7.7	7.1	0.7	0.0015	0.043
bf_mxflxxxx_0050a04.t3m.scf	bf_mxflxxxx_0050a04.t3m.scf_153	NA	35.2	not assigned.unknown	NOT VALIDATED NA: NA	GGTTAATCTCCGTTTCGTTTATCTTTGATTGTATTACCTGGTTTTCATTGTATTACTTCC	9.3	8.7	10.3	8.7	7.9	7.1	1.5	0.0016	0.043
bf_mxflxxxx_0052h04.t3m.scf	bf_mxflxxxx_0052h04.t3m.scf_388	NA	35.2	not assigned.unknown	NOT VALIDATED NA: NA	CATAAACTACTAGCGGGCAGCAGATCACTTGGAAGGAGGTAGTGAGCAATAGAATCACAA	6.6	6.7	6.8	6.8	8	8.1	-0.9	0.0016	0.043
bf_stolxxxx_0001F06.t3m.scf	bf_stolxxxx_0001F06.t3m.scf_507	EAZ06515	28.99	DNA.unspecified	NOT VALIDATED EAZ06515: hypothetical protein OsI_027747 [Oryza sativa (indica cultivar-group)]	CCTAGAAGTTCTCAATGGTCCTGGCATTGCTAGTTGATGTTCCAAGAGACAAGAACTTAA	11.9	11.9	11.2	12.5	12.7	12.5	-0.9	0.0016	0.043
cPRO4L16TH	cPRO4L16TH_726	2206327A	29.4	protein.postranslational modification	NOT VALIDATED 2206327A: T complex protein	GATACAGAGCTAATCTACGGAATTTGTAGTGACAAAGTATGAGTCATCCTCAGATGCCCA	8	8	8	7.5	6.9	7.6	0.7	0.0016	0.043
cSTB39J21TH	cSTB39J21TH_440	NA	35.2	not assigned.unknown	NOT VALIDATED NA: NA	TGCACAATTTGAACCTTTTTCTGAATATGTAGTTGTTGTAATCTACATCTTTGAAATCCA	7.3	7	6.9	7.4	8.4	7.8	-0.8	0.0015	0.043
MICRO.10257.C2	MICRO.10257.C2_186	NP_178391	35.1	not assigned.no ontology	NOT VALIDATED NP_178391: unknown protein [Arabidopsis thaliana]	AAGCCGACGTAAATTTTGCACTTCCCGATGACACCAGCAACGCTGCAGAAAATACTCAAA	10.8	9.7	10.2	9.3	8.8	9.3	1.1	0.0015	0.043
MICRO.1104.C1	MICRO.1104.C1_268	NA	35.2	not assigned.unknown	NOT VALIDATED NA: NA	TTCCCCCTTTACTCAGCTCCATTTTCTCTTATATAAACCTCCATTTACGTTCAGTGAAGG	7.5	7.3	7.4	6.6	6.8	6.9	0.6	0.0015	0.043
MICRO.11513.C1	MICRO.11513.C1_816	AAF69532	30.3	signalling.calcium	NOT VALIDATED AAF69532: F12M16.12 [Arabidopsis thaliana]	GAAATGTATACAAAGCTCCTTCTCTGTTCTTTACTTTTGGTCCTTTCTGAAAATATGTGG	6.4	6.6	6.8	7.2	7.1	8.2	-0.9	0.0015	0.043
MICRO.12718.C1	MICRO.12718.C1_683	NP_180875	30.2.11	signalling.receptor kinases.leucine rich repeat XI	NOT VALIDATED NP_180875: ATP binding / protein kinase/ protein serine/threonine kinase/ protein-tyrosine kinase [Arabidopsis thaliana]	CTCTAGGGGAATGTAATGCATCTCCAGCTTATGATGCCAATAATCCTCCTAGAGTCGAGA	5.9	6.4	6.2	6.7	6.6	6.9	-0.6	0.0016	0.043
MICRO.12874.C1	MICRO.12874.C1_645	BAD43365	16.99	secondary metabolism.unspecified	NOT VALIDATED BAD43365: adenosylmethionine-8-amino-7-oxononanoate aminotransferase-like protein [Arabidopsis thaliana]	ATGGTTGATCCACTATTTCAGAGAGTACTTGTTAAAGAATGCCGAAATCAAAAATTCCTG	7.5	7.8	7.3	7.1	6.9	6.9	0.6	0.0016	0.043
MICRO.1332.C1	MICRO.1332.C1_2122	ABG46343	17.2.2	hormone metabolism.auxin.signal transduction	NOT VALIDATED ABG46343: transport inhibitor response 1 [Gossypium hirsutum]	GAGTTTGAACTCTGAGTTTCTGTGTATCATCTAGAGTAACAATTATTCGTTTTCTTTGGG	9.8	10.4	9.9	10.7	10.9	10.7	-0.7	0.0016	0.043
MICRO.13764.C1	MICRO.13764.C1_1056	BAB16429	26.19	misc.plastocyanin-like	NOT VALIDATED BAB16429: NtEIG-A1 [Nicotiana tabacum]	GATTGTGCGAGTAGAAGAGTATATTTTCAGTTGTGAGTAATATTCCCTAATTTCTGTACC	6	6.1	6.3	6.6	6.8	6.9	-0.6	0.0015	0.043
MICRO.14906.C1	MICRO.14906.C1_982	AAB31249	27.3.35	RNA.regulation of transcription.bZIP transcription factor family	NOT VALIDATED AAB31249: mas-binding factor MBF2 [Solanum tuberosum]	CCAGGATTTGAACTTAATGAGTTCAACCTAGCAACGAACTCACACTAGTAAAATTATGGA	9.1	8.8	8.6	8.4	7.8	7.9	0.8	0.0015	0.043
MICRO.1495.C1	MICRO.1495.C1_1545	ABO82799	31.4	cell. vesicle transport	NOT VALIDATED ABO82799: GAT; ENTH/VHS [Medicago truncatula]	GATATTGTGTGGGTTGAGGGTTGGAAGTTATCAACATTCTTATATGCCAGTTTAAATTTG	12.4	11.2	12.6	11.1	10.9	11	1	0.0016	0.043
MICRO.1500.C4	MICRO.1500.C4_849	NP_200279	27.3.06	RNA.regulation of transcription.bHLH,Basic Helix-Loop-Helix family	NOT VALIDATED NP_200279: DNA binding / transcription factor [Arabidopsis thaliana]	TTAAACGCTCTTTAGCTGTGTTAGTTTATTCGTCGAGTCCTTTTGGTGTATTTGGTGGAT	9.8	10.1	9.5	10.5	10.4	10.5	-0.6	0.0016	0.043
MICRO.154.C7	MICRO.154.C7_709	BAA89335	11.9.2	lipid metabolism.lipid degradation.lipases	NOT VALIDATED BAA89335: EEF53 [Solanum melongena]	TCAAATTGGGTAGAGCAGTGGGTCATCTCCCACCTCATGTAACAAGGATAGGTTTGTCTA	7.1	7.5	7.1	8.1	8.4	7.9	-0.9	0.0015	0.043
MICRO.15740.C1	MICRO.15740.C1_1209	NP_190652	35.1	not assigned.no ontology	NOT VALIDATED NP_190652: COR413-PM2 [Arabidopsis thaliana]	AAAGTACTTGTGGTTGATGGATTTAAGTTGTAAAGTTTTCTTCACACATTTCACGCTTGC	9.4	10.6	9.4	10.9	11.1	10.7	-1.1	0.0016	0.043
MICRO.15742.C1	MICRO.15742.C1_606	AAK81856	29.5.11.04.06	protein.degradation.ubiquitin.E3.DCX	NOT VALIDATED AAK81856: photoregulatory zinc-finger protein COP1 [Rosa hybrid cultivar]	AACAACTACGCCTCAGTCCCAAACCGATCATATAGTAGTAGTAGTCACATAATTCTTATA	9.4	9	12.2	8.6	8.5	6.6	2.3	0.0016	0.043
MICRO.15808.C1	MICRO.15808.C1_707	NP_190789	27.1	RNA.processing	NOT VALIDATED NP_190789: unknown protein [Arabidopsis thaliana]	ACTTGACGAAAATTGAACAGCTTCCTTATTGTATTCATAGATGTCAAGTGATTTCGAGGT	8.8	8.8	9.2	8.4	8.1	7	1.1	0.0015	0.043
MICRO.17555.C1	MICRO.17555.C1_753	NA	35.2	not assigned.unknown	NOT VALIDATED NA: NA	ACAAGCTGAAGTTTCCAGTCCGCCATGTTTCACAGTTTGGTTCCAAACAAATCCGCTTTT	6.5	6.2	6	7.4	6.6	7.1	-0.8	0.0016	0.043
MICRO.18017.C1	MICRO.18017.C1_323	NA	35.2	not assigned.unknown	NOT VALIDATED NA: NA	AGCACCAGAAATTTCTTCCTGCATAAAGTGATTCATGAGCCCTATGCTTCTTTCCACCAA	9.8	9.5	9.9	9	9.3	9	0.6	0.0015	0.043
MICRO.18298.C1	MICRO.18298.C1_535	NA	35.2	not assigned.unknown	NOT VALIDATED NA: NA	GCTCAAGTTAAATAGTGGTTGTGAGTGCTCTTCCCTTTCCATGGATGAATCCAGCATTGA	8.6	8.9	8.3	9.3	9.2	9.2	-0.6	0.0016	0.043
MICRO.1843.C2	MICRO.1843.C2_505	NP_173478	35.1	not assigned.no ontology	NOT VALIDATED NP_173478: nucleotide binding [Arabidopsis thaliana]	ATACTTCAAAGAAGAATGCACAGGTCTGCTGCAAAATTTAGGTACAATCACAAGAATCAG	7.7	7.3	7.7	7	6.5	6.9	0.8	0.0016	0.043
MICRO.2215.C3	MICRO.2215.C3_634	NA	35.2	not assigned.unknown	NOT VALIDATED NA: NA	TTTTTTGTTTGGTTTTGTTATAATCACGGTATTCGGGCCAATTGGCGCGCATCACTACTA	10.1	8.9	11.4	8.8	8.6	8.1	1.6	0.0015	0.043
MICRO.2636.C1	MICRO.2636.C1_1823	AAF70825	10.6.2	cell wall.degradation.mannan-xylose-arabinose-fucose	NOT VALIDATED AAF70825: putative beta-galactosidase [Lycopersicon esculentum]	AATCGTCTGTGTTGTGCAGTTGGCAGAAAGAATTCAATGGAAAAGTGTATTTGCATCCAT	8.1	6.7	8.3	9.8	9.7	8.6	-1.7	0.0016	0.043
MICRO.279.C1	MICRO.279.C1_355	ABE89955	35.1	not assigned.no ontology	NOT VALIDATED ABE89955: Mast C-terminus, putative [Medicago truncatula]	GTGCACTTCAACAACTAGTTGAAGCTGTTACCAAAGATCAATCCATATGGAGCAAGTACT	9	8.6	8.6	8.1	7.4	8.1	0.9	0.0016	0.043
MICRO.2913.C1	MICRO.2913.C1_2128	NP_974839	35.2	not assigned.unknown	NOT VALIDATED NP_974839: unknown protein [Arabidopsis thaliana]	GAAATGCTATGTTGTCAAGACACTGATGATTGATGATAAGTGAAAAGTGTAAAGAACTGC	9.9	10	9.8	9.5	9.5	8.8	0.7	0.0015	0.043
MICRO.2957.C1	MICRO.2957.C1_220	CAH68241	17.6.1	hormone metabolism.gibberelin.synthesis-degradation	NOT VALIDATED CAH68241: H0306F03.8 [Oryza sativa (indica cultivar-group)]	AGACAAGTGGGTTGAGCCATTACCAAATTGGAGAGTCACCAAAGTACAGAGGATTCGTGT	9.3	10.1	8	11.3	10.7	10.6	-1.7	0.0016	0.043
MICRO.3711.C2	MICRO.3711.C2_1155	ABO84288	27.3.06	RNA.regulation of transcription.bHLH,Basic Helix-Loop-Helix family	NOT VALIDATED ABO84288: Steroid nuclear receptor, ligand-binding; Helix-loop-helix DNA-binding [Medicago truncatula]	ATGGGCAATGGCGGGACTTGAGTTAGTCCTCCTATCCCAATGTGACTCACTGTTTTTATT	8.9	8.6	8.7	8.3	8.1	7.4	0.8	0.0016	0.043
MICRO.3744.C1	MICRO.3744.C1_2117	ABI64067	26.02	misc.UDP glucosyl and glucoronyl transferases	NOT VALIDATED ABI64067: glycosyltransferase GT47C [Populus alba x Populus tremula]	TTGGAGAGAAATATGAAGAAACAGGATGCTTATGCTTTGCTGTACAATTCCTTTGTTTTC	12.2	11.1	12.7	11.3	9.5	9.7	1.8	0.0016	0.043
MICRO.4673.C1	MICRO.4673.C1_958	NP_001063741	7.1.02	OPP.oxidative PP.6-phosphogluconolactonase	NOT VALIDATED NP_001063741: Os09g0529100 [Oryza sativa (japonica cultivar-group)]	ATAAGGTTTGATAACTTCTCTTTGCGAACTGAGATCCGTGATCAGAATATAATACATTGC	12	12.6	11.9	13.1	13.1	12.8	-0.8	0.0015	0.043
MICRO.4826.C1	MICRO.4826.C1_831	NP_193853	35.2	not assigned.unknown	NOT VALIDATED NP_193853: unknown protein [Arabidopsis thaliana]	GTAGCTAATGTACCCATTGTCATGAATATAGACTTACCCAATACACTGTTTGAAGTTAAC	9.6	9.8	9	10.3	10.3	10.3	-0.8	0.0016	0.043
MICRO.5147.C1	MICRO.5147.C1_93	ABO80102	27.3.69	RNA.regulation of transcription.SET-domain transcriptional regulator family	NOT VALIDATED ABO80102: hypothetical protein MtrDRAFT_AC139314g5v1 [Medicago truncatula]	CTTCACCTGAAATACATATATCAATCTTTACAGACACCAGAGAACTTGGAAATTGAACTC	7.3	7.8	7	6.9	6.6	6.4	0.7	0.0016	0.043
MICRO.6095.C1	MICRO.6095.C1_1081	NP_187924	35.1	not assigned.no ontology	NOT VALIDATED NP_187924: RNA binding [Arabidopsis thaliana]	ATTATTGATTGTTGTGCTGCTCCAGGAGGGAAAACCTTGTTCATGGCATCCCCGTTTGAA	7.6	7.4	7.4	6.8	6.4	7.2	0.7	0.0015	0.043
MICRO.6239.C1	MICRO.6239.C1_910	BAF36749	27.3.25	RNA.regulation of transcription.MYB domain transcription factor family	NOT VALIDATED BAF36749: telomere binding protein [Solanum lycopersicum]	GCACATGTCTCTCTAGGGTTTATTTTGTTTCTGTTGGTTCTTTCATTTGGTATTATTAGG	11.2	11.6	10.6	11.9	12.2	11.7	-0.8	0.0015	0.043
MICRO.727.C1	MICRO.727.C1_778	NP_194915	21.02.2	redox.ascorbate and glutathione.glutathione	NOT VALIDATED NP_194915: ATGPX7 (GLUTATHIONE PEROXIDASE 7); glutathione peroxidase [Arabidopsis thaliana]	ACGTCGCCTTTACAAATCGAGAAAGATATTCAGAAACTTTTGGCAGCTTAAATAATGCTC	9.9	10.4	9.9	11	11.1	10.5	-0.8	0.0016	0.043
MICRO.7376.C1	MICRO.7376.C1_950	NP_563723	35.2	not assigned.unknown	NOT VALIDATED NP_563723: unknown protein [Arabidopsis thaliana]	CCAAAGGTCCAGTTGCTAGCAAAATGAGGATTCACAGATCTTATCCAGTTGGGTTGTCTT	11.1	10.9	11	10.3	10.4	10.6	0.5	0.0015	0.043
MICRO.8072.C2	MICRO.8072.C2_845	NP_172771	35.2	not assigned.unknown	NOT VALIDATED NP_172771: EMB1745 [Arabidopsis thaliana]	GAGAAACACTGAAGCTCAAAGAGAAATGAACAGAAAATTCGACATGCAGTACCAGCGTAA	8.5	8.3	7.6	7	6.9	7.5	1	0.0015	0.043
MICRO.8460.C1	MICRO.8460.C1_1171	CAB40937	35.2	not assigned.unknown	NOT VALIDATED CAB40937: putative protein [Arabidopsis thaliana]	TGCGCATGGAAGAGAGACCATATGATGCAGTTTGTGAAAATGAAAAACAAGTTCAGTATT	9.4	9.7	7.8	11.1	10.3	10.1	-1.5	0.0015	0.043
MICRO.887.C2	MICRO.887.C2_1243	EAY75008	20.1.02	stress.biotic.receptors	NOT VALIDATED EAY75008: hypothetical protein OsI_002855 [Oryza sativa (indica cultivar-group)]	CTTGTACTGCTAAATGTATCTGTATCAATAAGGGGAGAAACCCCACTAGGGTCATTGGTA	13.8	12.6	14.1	12	12.7	12.3	1.2	0.0016	0.043
MICRO.89.C1	MICRO.89.C1_1870	ABE93659	29.2.3	protein.synthesis.initiation	NOT VALIDATED ABE93659: Translation initiation factor IF5; eIF4-gamma/eIF5/eIF2-epsilon [Medicago truncatula]	TATCATGTTTTGGTGTTGAGTCATACACTCCAACCTTGTCTTGCTGTTACATTTTATAAG	9.6	8.8	9.8	8.1	8.5	8.7	1	0.0016	0.043
[truncated: 40,453 more rows]

## Sheet: FC 1 FDR 0.05
Gene ID	Probe	BlastX tophit	BINCODE	GO CLASS	Description/blastx	probe sequence	Neg.Wet	Neg.Wet	Neg.Wet	Neg.Dry	Neg.Dry	Neg.Dry	logFC Neg.Wet-Neg.Dry	p Neg.Wet-Neg.Dry	FDR Neg.Wet-Neg.Dry
[truncated: 2,165 more rows]
