# Supplementary material for: Effect of wet storage conditions on potato tuber transcriptome, phytohormones and growth
Source: BMC Plant Biol. 2019 Jun 17;19:262. doi: 10.1186/s12870-019-1875-y (PMC6580497; doi:10.1186/s12870-019-1875-y)
Supplement: Supplementary file 2 — RNA-Seq data. Raw data and DEGs of RNA-Seq data for one hour, 24 h and one week. DEGs identified with NOIseq with probability > 0.8, p-value < 0.05 and log 2 fold change ≥2 and ≤ − 2. Also the list of DEGs and categorized genes. (XLSX 1923 kb) [file 12870_2019_1875_MOESM2_ESM.xlsx]

## Sheet: Raw data
gene_id	locus	R1-1H-dry	R1-1H-wet	R1-24H-dry	R1-24H-wet	R1-Week-dry	R1-Week-wet	R2-1H-dry	R2-1H-wet	R2-24H-wet	R2-Week-dry	R2-Week-wet	R3-1H-dry	R3-1H-wet	R3-24H-dry	R3-24H-wet	R3-week-dry
XLOC_003319|PGSC0003DMT400062273	PGSC0003DMB000000016:3131825-3135506	41393	292203	171337	495684	300581	191423	169174	285348	138139	225282	148272	111202	355523	198816	148767	411214
XLOC_004899|PGSC0003DMT400036668	PGSC0003DMB000000026:577296-580319	18398	240496	234187	0	462121	223987	12581	280056	0	0	0	0	373249	388172	0	0
XLOC_007034|PGSC0003DMT400023716	PGSC0003DMB000000040:503612-530780	1167,81	1173,54	233195	2148,41	247201	1595,19	213349	520278	2049,97	276855	269051	449294	242682	475349	1394,13	337887
XLOC_007910|PGSC0003DMT400070613,PGSC0003DMT400070614,PGSC0003DMT400070615	PGSC0003DMB000000047:453061-456251	212844	346297	339558	262569	339909	146824	521669	172864	816775	2171094	203841	2146441	0	0	131634	648977
XLOC_016981|PGSC0003DMT400039410,PGSC0003DMT400039411	PGSC0003DMB000000127:629582-634806	328479	474234	119658	665315	767659	589621	160271	298689	490964	138968	306732	150682	286,23	96743	433,79	828434
XLOC_020728|PGSC0003DMT400013941,PGSC0003DMT400013942,PGSC0003DMT400013943	PGSC0003DMB000000165:69782-73227	419958	136252	1532134	474301	135583	189692	2316674	118192	192655	164159	212478	159224	128855	190744	203,25	284763
XLOC_030396|PGSC0003DMT400015091	PGSC0003DMB000000345:195062-196192	152794	395468	150898	342588	354043	291881	908302	211705	338468	436615	830202	957926	155043	120891	277095	161513
XLOC_032286|PGSC0003DMT400022567,PGSC0003DMT400036586	PGSC0003DMB000000402:486113-527961	641283	491523	1140,66	597376	433278	117552	427407	227227	118161	1682,83	371267	838969	450892	164336	46672	1375,34
XLOC_035240|PGSC0003DMT400053289,PGSC0003DMT400053290,PGSC0003DMT400053291	PGSC0003DMB000000511:252921-256897	150832	317144	802745	1479,11	0	582093	403992	142937	471754	0	391792	402393	128726	380867	375,8	396317
XLOC_039552|PGSC0003DMT400041454,PGSC0003DMT400041455	PGSC0003DMB000000884:26690-28303	17183	121291	610906	25126	416185	0	360513	120377	161075	280575	0	0	280103	203928	0	408674
XLOC_039936|PGSC0003DMT400075153,PGSC0003DMT400075154,PGSC0003DMT400075155,PGSC0003DMT400075156	PGSC0003DMB000001059:8083-9221	493173	202966	741708	1022,67	866207	155,14	393925	513605	307244	107292	237919	784745	734959	557039	639494	132263
XLOC_040390|PGSC0003DMT400082699	PGSC0003DMB000002140:8-971	0	0	0	0	115,81	167033	729234	631281	0	0	0	0	725686	106943	0	0
XLOC_040540|-	PGSC0003DMB000012094:0-247	0	0	0	0	150001	0	0	0	0	0	0	0	0	0	0	0
XLOC_000001|PGSC0003DMT400084231	PGSC0003DMB000000001:73028-75744	157704	149906	100782	693309	129,55	285592	131328	214,29	178323	151307	178011	524783	138766	129329	233552	69287
XLOC_000003|PGSC0003DMT400051483,PGSC0003DMT400051484	PGSC0003DMB000000001:294131-305658	249183	218162	135294	304319	1617630	266773	501548	120261	1632210	258549	0	0	0	0	131755	253713
XLOC_000011|PGSC0003DMT400033984,PGSC0003DMT400033985	PGSC0003DMB000000001:671047-682490	281099	28,65	157183	220152	91,93	562763	511027	254292	214974	112,92	0	0	471046	31717	324428	10426
XLOC_000019|PGSC0003DMT400022191	PGSC0003DMB000000001:1161577-1163988	395046	223085	0	0	338001	316876	238104	234822	288725	222839	0	0	0	0	0	0
XLOC_000039|PGSC0003DMT400031392	PGSC0003DMB000000001:2301482-2308370	1319927	186665	0	0	0	0	148643	769778	0	0	0	0	0	0	0	0
XLOC_000057|-	PGSC0003DMB000000001:3657994-3668792	288503	257644	171135	192021	184557	420542	184199	15647	248366	193352	270369	300432	0	0	0	0
XLOC_000058|PGSC0003DMT400046120,PGSC0003DMT400046121	PGSC0003DMB000000001:3684737-3689088	697837	16806	0	0	0	0	0	0	0	0	0	0	314713	146073	0	0
XLOC_000064|PGSC0003DMT400028375,PGSC0003DMT400028376	PGSC0003DMB000000001:3881608-3888265	201005	42506	0	0	174622	153557	14809	168662	0	0	0	0	0	0	0	0
XLOC_000070|PGSC0003DMT400003101	PGSC0003DMB000000001:4038352-4043383	404353	228341	244926	350385	485028	388644	282791	243407	233033	293448	0	0	0	0	0	0
XLOC_000080|PGSC0003DMT400020072	PGSC0003DMB000000001:5522523-5527200	0	0	0	0	2003692	758776	800849	411395	0	0	0	0	0	0	0	0
XLOC_000082|PGSC0003DMT400041254,PGSC0003DMT400041255,PGSC0003DMT400041257,PGSC0003DMT400041259	PGSC0003DMB000000001:5746059-5759822	539629	554914	587821	925233	526006	781765	318355	291959	369856	557053	259047	201957	222116	517506	285078	400005
XLOC_000084|PGSC0003DMT400041246,PGSC0003DMT400041247,PGSC0003DMT400041248,PGSC0003DMT400041249,PGSC0003DMT400041250,PGSC0003DMT400041251,PGSC0003DMT400041252	PGSC0003DMB000000001:5776266-5780466	153823	589044	0	0	177568	139912	0	0	0	0	0	0	0	0	0	0
XLOC_000085|PGSC0003DMT400041244	PGSC0003DMB000000001:5817351-5820245	438841	492455	226699	416834	638528	574286	339962	430936	452317	312353	0	0	304477	400628	388054	142733
XLOC_000086|PGSC0003DMT400074727,PGSC0003DMT400074728,PGSC0003DMT400074729	PGSC0003DMB000000001:5868845-5875043	122656	133431	632574	717117	126227	115495	105799	855328	91014	929925	603007	674319	135553	146686	125402	117204
XLOC_000087|PGSC0003DMT400074732,PGSC0003DMT400074733	PGSC0003DMB000000001:5889250-5894425	829093	655607	393889	100386	314493	318426	303226	355912	327694	251902	0	0	426813	228164	206331	308692
XLOC_000100|PGSC0003DMT400084232	PGSC0003DMB000000001:73028-75744	149226	526682	0	290946	0	0	0	0	0	0	0	0	0	0	0	0
XLOC_000102|-	PGSC0003DMB000000001:244304-258743	253385	697063	167147	596172	200325	212671	0	0	0	0	370282	176889	0	274503	0	0
XLOC_000106|PGSC0003DMT400022528	PGSC0003DMB000000001:391570-392129	0	0	0	0	0	0	0	196419	0	0	0	0	0	0	0	0
XLOC_000107|PGSC0003DMT400022525,PGSC0003DMT400022526,PGSC0003DMT400033988	PGSC0003DMB000000001:414843-446298	383599	123393	321929	121096	500267	650062	240702	761687	111,19	692508	704027	262305	314276	175141	628522	847211
XLOC_000110|PGSC0003DMT400033992,PGSC0003DMT400033993,PGSC0003DMT400033994	PGSC0003DMB000000001:711775-715302	246898	275773	138351	220693	214788	244087	164051	10903	184613	1503979	0	0	0	0	0	0
XLOC_000155|PGSC0003DMT400003226	PGSC0003DMB000000001:3119252-3125551	2011,7	2256,65	1853,54	2660,5	1960,14	2281,37	1944,19	1670,01	1572,21	2108,69	1018,33	577531	1688,95	1818,71	1406,03	1460,63
XLOC_000168|PGSC0003DMT400003104,PGSC0003DMT400003105	PGSC0003DMB000000001:4063146-4092496	248617	419164	0	0	204256	17274	11398	176451	42478	121599	0	0	316216	14617	0	0
XLOC_000172|-	PGSC0003DMB000000001:4195612-4241329	261755	11738	224289	225794	179798	186984	262855	217236	131861	213486	0	0	328791	184888	0	0
XLOC_000181|PGSC0003DMT400022599,PGSC0003DMT400022600	PGSC0003DMB000000001:4621197-4622949	0	0	0	0	0	0	0	0	0	0	0	0	0	0	0	0
XLOC_000188|PGSC0003DMT400034052,PGSC0003DMT400034053,PGSC0003DMT400034054,PGSC0003DMT400034055	PGSC0003DMB000000001:5274037-5281529	0	0	0	0	0	0	0	0	0	0	0	0	0	0	0	0
XLOC_000192|PGSC0003DMT400041261	PGSC0003DMB000000001:5719547-5735220	0	0	0	0	0	0	0	0	0	0	0	0	0	0	0	0
XLOC_000194|PGSC0003DMT400041239,PGSC0003DMT400041240	PGSC0003DMB000000001:5820853-5824235	0	0	0	0	181547	27664	251906	24779	0	0	0	0	0	0	660278	337779
XLOC_000206|PGSC0003DMT400008958,PGSC0003DMT400008959,PGSC0003DMT400008960	PGSC0003DMB000000001:6685951-6688259	297309	459553	0	0	151834	477232	406143	284498	282311	165147	0	0	567449	120002	379846	0
XLOC_000207|PGSC0003DMT400044062	PGSC0003DMB000000001:7029445-7035686	692143	938824	329714	132301	291146	815913	412875	507074	677524	310246	238236	323321	734459	402664	637491	215187
XLOC_000209|-	PGSC0003DMB000000001:3073755-3074429	0	0	0	0	0	0	0	0	0	0	0	0	0	0	0	0
XLOC_000210|-	PGSC0003DMB000000001:4056701-4057203	0	0	0	0	0	0	0	0	0	0	0	0	0	0	0	0
XLOC_000211|-	PGSC0003DMB000000001:4104066-4104675	0	0	0	0	0	0	0	0	0	0	0	0	0	0	0	0
XLOC_000212|-	PGSC0003DMB000000002:61945-67689	216969	161487	146767	225036	226176	158443	880849	621789	132178	840137	177025	163868	226063	225575	148,89	447714
XLOC_000214|-	PGSC0003DMB000000002:145234-163166	231398	291016	191603	161549	268522	280584	147557	2017205	226678	232647	0	0	232411	345378	0	0
XLOC_000215|PGSC0003DMT400024144	PGSC0003DMB000000002:164310-167682	0	0	0	0	0	0	0	0	0	0	0	0	0	0	0	0
XLOC_000217|-	PGSC0003DMB000000002:199709-219362	0	0	0	0	0	0	0	0	0	0	0	0	0	0	0	0
XLOC_000218|-	PGSC0003DMB000000002:220516-249877	0	0	0	0	0	0	0	0	0	0	0	0	0	0	0	0
XLOC_000220|PGSC0003DMT400024153	PGSC0003DMB000000002:271500-274574	1599672	252338	0	0	15378	183868	648676	151008	169133	142004	0	0	0	0	0	0
XLOC_000222|PGSC0003DMT400024154,PGSC0003DMT400024155,PGSC0003DMT400024156	PGSC0003DMB000000002:348026-356954	183828	230672	0	0	177246	2737403	622119	746541	0	0	0	0	0	0	718629	337872
XLOC_000223|PGSC0003DMT400024157,PGSC0003DMT400024158,PGSC0003DMT400024159	PGSC0003DMB000000002:359886-363544	755193	146173	0	0	0	0	163054	0	0	0	0	0	0	0	0	0
XLOC_000226|PGSC0003DMT400024162,PGSC0003DMT400024163	PGSC0003DMB000000002:413388-420289	570956	684236	619748	949802	889745	509258	437631	397672	314232	691051	542598	282151	312251	744679	349933	356799
XLOC_000227|PGSC0003DMT400024164,PGSC0003DMT400024165	PGSC0003DMB000000002:421416-426812	0	0	0	0	0	0	0	0	0	0	0	0	0	0	0	0
XLOC_000228|PGSC0003DMT400024168,PGSC0003DMT400024169	PGSC0003DMB000000002:429019-434608	0	0	366783	346283	0	0	0	0	0	0	0	0	0	0	0	0
XLOC_000229|PGSC0003DMT400024170,PGSC0003DMT400024171	PGSC0003DMB000000002:459785-464118	139443	171216	0	0	170576	499167	2577397	15734	0	0	0	0	0	0	0	0
XLOC_000230|PGSC0003DMT400024173,PGSC0003DMT400024174,PGSC0003DMT400024175,PGSC0003DMT400024176,PGSC0003DMT400024177	PGSC0003DMB000000002:480011-487900	0	0	0	0	0	0	0	0	0	0	0	0	0	0	0	0
XLOC_000231|PGSC0003DMT400024179	PGSC0003DMB000000002:505507-507151	234725	445644	354912	446844	22405	322072	241143	393143	377835	383277	0	0	0	0	0	0
XLOC_000234|PGSC0003DMT400024186,PGSC0003DMT400024187,PGSC0003DMT400024188,PGSC0003DMT400024189	PGSC0003DMB000000002:543188-550692	187706	289857	273589	142317	391883	152256	224396	212121	246554	358803	0	0	265253	252123	0	0
XLOC_000235|PGSC0003DMT400033576,PGSC0003DMT400033577	PGSC0003DMB000000002:583809-590156	570323	465684	488567	804577	969608	867461	22408	38467	542408	301869	172327	263214	107363	592609	463591	121191
XLOC_000238|PGSC0003DMT400033580,PGSC0003DMT400033581,PGSC0003DMT400033582	PGSC0003DMB000000002:654384-659117	195628	276177	0	0	773589	201405	156358	269745	157032	258588	0	0	378116	552781	0	0
XLOC_000239|PGSC0003DMT400033584	PGSC0003DMB000000002:688232-691531	17754	626612	0	0	0	0	136582	552791	0	0	0	0	0	0	0	0
XLOC_000240|PGSC0003DMT400033585	PGSC0003DMB000000002:701538-708127	901023	120211	617917	587342	110934	840338	612025	527988	765983	558296	0	0	45088	567971	442274	205982
XLOC_000241|PGSC0003DMT400033587,PGSC0003DMT400033588	PGSC0003DMB000000002:728984-733086	0	0	0	0	0	0	0	0	0	0	0	0	0	0	0	0
XLOC_000242|PGSC0003DMT400033589	PGSC0003DMB000000002:766245-770303	201689	319796	257495	432539	326542	300434	174056	177006	389551	223714	278296	121849	0	0	0	0
XLOC_000243|-	PGSC0003DMB000000002:772343-796741	0	0	0	0	15393	813803	921124	0,976359	0	0	0	0	0	0	0	0
XLOC_000244|-	PGSC0003DMB000000002:800582-801455	652847	230416	0	0	0	0	0	0	0	0	0	0	0	0	0	0
XLOC_000248|PGSC0003DMT400005419,PGSC0003DMT400005420	PGSC0003DMB000000002:911168-914655	192103	242484	0	0	152782	2814469	857663	878111	0	0	0	0	0	0	0	0
XLOC_000250|PGSC0003DMT400005421	PGSC0003DMB000000002:956225-966990	797305	849801	915791	490252	519114	217514	209844	388405	80003	459329	0	0	403816	20,38	405504	297351
XLOC_000251|PGSC0003DMT400005425	PGSC0003DMB000000002:967425-969647	213687	191975	0	0	268868	184847	15488	181456	0	0	0	0	0	0	0	0
XLOC_000252|PGSC0003DMT400005427,PGSC0003DMT400005428,PGSC0003DMT400005429	PGSC0003DMB000000002:970685-972692	516909	683499	632357	162549	623117	548114	572975	44267	518923	871279	0	0	601592	211575	257777	423023
XLOC_000255|PGSC0003DMT400005437,PGSC0003DMT400005440	PGSC0003DMB000000002:1019711-1027189	0	0	291508	128075	186569	514916	1010718	160639	194215	187979	275659	187801	0	394159	0	0
XLOC_000257|PGSC0003DMT400005445,PGSC0003DMT400005446	PGSC0003DMB000000002:1107950-1111003	0	0	0	0	0	0	124585	831999	0	0	0	0	0	0	0	0
XLOC_000277|-	PGSC0003DMB000000002:2565233-2566464	0	0	0	0	0	0	0	0	0	0	0	0	0	0	0	0
XLOC_000283|PGSC0003DMT400014270,PGSC0003DMT400014271	PGSC0003DMB000000002:3290016-3292867	308122	563536	1017172	139764	132711	454924	855373	272344	400346	295742	556442	10687	579921	166482	394807	0
XLOC_000289|PGSC0003DMT400071355,PGSC0003DMT400071356,PGSC0003DMT400071357	PGSC0003DMB000000002:3402505-3409674	19,53	161314	0	948595	159509	458726	240904	150713	0	0	0	0	0	0	0	0
XLOC_000292|PGSC0003DMT400071350	PGSC0003DMB000000002:3559741-3563790	0	0	0	0	0	0	0	0	0	0	0	0	0	0	1553864	299488
XLOC_000298|PGSC0003DMT400028119	PGSC0003DMB000000002:4022030-4026396	0	0	0	0	0	0	0	0	0	0	0	0	0	0	0	0
XLOC_000299|-	PGSC0003DMB000000002:4028635-4042656	0	0	0	0	0,00174891	192995	0	0	0	0	0	0	0	0	0	0
XLOC_000305|PGSC0003DMT400092522	PGSC0003DMB000000002:4403260-4403623	490207	284238	134863	102402	375583	416474	407727	441541	351877	300168	219521	987844	236866	415555	229016	194316
XLOC_000306|PGSC0003DMT400094849	PGSC0003DMB000000002:4403978-4407442	0	0	0	0	0	0	0	0	0	0	0	0	0	0	0	0
XLOC_000322|-	PGSC0003DMB000000002:5445309-5456286	318654	291089	338765	301502	421577	287808	316586	166334	2084045	38259	0	0	169068	344809	167179	252627
XLOC_000324|PGSC0003DMT400050320	PGSC0003DMB000000002:5577369-5662945	809786	172805	20023	218176	2145771	151295	290855	131767	191622	132235	259014	742022	0	0	0	0
XLOC_000333|PGSC0003DMT400024190,PGSC0003DMT400024191,PGSC0003DMT400024193,PGSC0003DMT400024194	PGSC0003DMB000000002:21492-45506	315975	556639	730858	377466	205537	199534	2697288	217009	175732	190719	0	0	0	0	284743	0
XLOC_000335|PGSC0003DMT400024197	PGSC0003DMB000000002:172733-176743	196279	318519	154347	443474	137104	282449	150097	181622	171267	539174	0	0	0	0	0	0
XLOC_000336|PGSC0003DMT400024200,PGSC0003DMT400024201	PGSC0003DMB000000002:190030-194198	0	0	0	0	0	0	0	0	0	0	0	0	0	0	0	0
XLOC_000337|PGSC0003DMT400024205,PGSC0003DMT400024206,PGSC0003DMT400024207,PGSC0003DMT400024208	PGSC0003DMB000000002:252173-257972	541467	37167	275944	215731	623515	684964	453431	454251	527476	529122	792755	20811	1834158	549991	457203	401009
XLOC_000338|-	PGSC0003DMB000000002:276266-294059	0	0	0	0	14872	2654492	0	0	172678	763428	0	0	0	0	0	0
XLOC_000339|PGSC0003DMT400024212,PGSC0003DMT400024213	PGSC0003DMB000000002:367860-375522	0	0	0	0	0	0	807213	544852	0	0	0	0	0	0	0	0
XLOC_000341|PGSC0003DMT400024214,PGSC0003DMT400024215	PGSC0003DMB000000002:377650-383519	437864	341599	24974	999832	172394	234908	206702	265776	43002	395361	0	0	0	0	211216	239198
XLOC_000343|PGSC0003DMT400024219,PGSC0003DMT400024220,PGSC0003DMT400024221,PGSC0003DMT400024222	PGSC0003DMB000000002:397473-406024	0	0	0	0	144429	360040	0	0	0	0	0	0	0	0	0	0
XLOC_000345|PGSC0003DMT400024237,PGSC0003DMT400024238,PGSC0003DMT400024239	PGSC0003DMB000000002:442700-446516	162065	233072	0	0	383666	259058	261025	411368	214078	951393	0	0	306572	299657	0	0
XLOC_000350|PGSC0003DMT400024242,PGSC0003DMT400024243,PGSC0003DMT400024244,PGSC0003DMT400024245	PGSC0003DMB000000002:488326-492734	0	0	0	0	0	0	0	0	0	0	0	0	0	0	0	0
XLOC_000351|PGSC0003DMT400024246,PGSC0003DMT400024247	PGSC0003DMB000000002:493433-500961	339912	404313	104066	290354	301247	176789	197085	192608	0	0	0	0	0	0	508197	14531
XLOC_000353|PGSC0003DMT400024250	PGSC0003DMB000000002:556384-557881	778253	741629	576446	157426	134643	101824	204106	572476	129929	317698	75627	195166	0	0	659412	308497
XLOC_000354|PGSC0003DMT400024251	PGSC0003DMB000000002:566010-574929	173378	272514	222932	426095	167535	384422	149671	24811	407502	148993	368536	920946	0	0	26596	111799
XLOC_000355|-	PGSC0003DMB000000002:594114-608345	0	0	0	0	165074	703763	0	0	0	0	0	0	0	0	0	0
XLOC_000361|PGSC0003DMT400033619,PGSC0003DMT400033620	PGSC0003DMB000000002:678282-685193	846666	147654	0	0	144756	1109943	940441	8839	0	0	0	0	0	0	0	0
XLOC_000363|PGSC0003DMT400033622	PGSC0003DMB000000002:701538-708127	0	0	0	0	221521	673544	943889	452111	103670	183648	0	0	0	0	0	0
XLOC_000367|-	PGSC0003DMB000000002:932882-941708	923516	744106	0	0	0	0	995584	397642	0	0	0	0	0	0	0	0
XLOC_000369|PGSC0003DMT400005463,PGSC0003DMT400005464,PGSC0003DMT400005465,PGSC0003DMT400005466	PGSC0003DMB000000002:956225-966990	0	0	0	0	0	0	0	0	0	0	0	0	0	0	0	0
XLOC_000371|PGSC0003DMT400005470	PGSC0003DMB000000002:982999-986577	189557	227469	0	0	0	0	0	0	0	0	0	0	0	0	0	0
XLOC_000373|PGSC0003DMT400005471	PGSC0003DMB000000002:1078358-1079747	0	0	0	0	0	0	0	0	0	0	0	0	0	0	0	0
XLOC_000390|-	PGSC0003DMB000000002:2170951-2183362	789331	50665	721619	514862	603817	706244	519534	529892	375079	407033	203602	517477	611023	505854	466649	493464
XLOC_000406|PGSC0003DMT400071349	PGSC0003DMB000000002:3319483-3321828	0	0	0	0	0	0	0	0	0	0	0	0	0	0	0	0
XLOC_000420|PGSC0003DMT400028122	PGSC0003DMB000000002:4028635-4042656	779083	137973	0	0	135266	0	812916	843620	0	0	0	0	0	0	0	0
XLOC_000424|PGSC0003DMT400094849	PGSC0003DMB000000002:4403978-4407442	0	0	0	0	0	0	0	0	0	0	0	0	0	0	0	0
XLOC_000456|-	PGSC0003DMB000000002:5577369-5662945	238989	0	0	0	0,00174404	26903	0	0	0	0	0	0	0	0	135026	642659
XLOC_000462|PGSC0003DMT400019561	PGSC0003DMB000000002:5934002-5935880	0	0	0	0	0	0	0	0	0	0	0	0	0	0	0	0
XLOC_000472|-	PGSC0003DMB000000002:324449-324888	0	0	0	0	0	0	814808	155467	503579	362364	556514	208693	0	0	263902	703739
XLOC_000473|-	PGSC0003DMB000000002:1297530-1298409	247541	149773	0	0	0	0	0	0	0	0	0	0	0	0	0	0
XLOC_000474|-	PGSC0003DMB000000002:1486921-1487974	0	0	0	0	0	0	993612	130106	0	0	0	0	0	0	0	0
XLOC_000476|-	PGSC0003DMB000000002:2291397-2292011	0	0	0	0	0	0	138406	140043	0	0	0	0	540913	711728	0	0
XLOC_000477|-	PGSC0003DMB000000002:4601642-4602006	0	0	0	0	0	0	0	0	0	0	0	0	0	0	0	0
XLOC_000478|-	PGSC0003DMB000000002:5567013-5567835	0	0	0	0	0	0	10579	543443	0	0	0	0	0	0	0	0
XLOC_000479|PGSC0003DMT400070554,PGSC0003DMT400070555,PGSC0003DMT400070556	PGSC0003DMB000000003:18760-28137	401657	277203	311098	487847	342173	594408	281146	317198	284143	233469	0	0	201502	264836	403552	415082
XLOC_000480|-	PGSC0003DMB000000003:35052-48505	0	0	42473	271105	181831	228193	150253	15778	0	0	0	0	37626	332307	242522	268892
XLOC_000484|PGSC0003DMT400070560,PGSC0003DMT400070561,PGSC0003DMT400070563	PGSC0003DMB000000003:351772-357301	422778	335429	18451	48228	292418	61751	350458	309363	41,93	455669	310741	101769	201457	264481	41596	316983
XLOC_000491|PGSC0003DMT400070566	PGSC0003DMB000000003:504265-519885	0	0	0	0	0	0	0	0	0	0	0	0	0	0	0	0
XLOC_000495|PGSC0003DMT400070568,PGSC0003DMT400070569,PGSC0003DMT400070570	PGSC0003DMB000000003:781012-784738	184872	232291	201091	230095	185032	284665	949365	148891	300034	372144	0	0	0	0	0	0
XLOC_000498|-	PGSC0003DMB000000003:839878-851186	0	0	0	0	0	0	0	0	0	0	0	0	0	0	0	0
XLOC_000509|PGSC0003DMT400041095,PGSC0003DMT400041096,PGSC0003DMT400041097,PGSC0003DMT400041100	PGSC0003DMB000000003:1660434-1666521	0	0	0	0	133286	657448	0	0	0	0	0	0	0	0	0	0
XLOC_000510|-	PGSC0003DMB000000003:1705433-1710913	0	0	0	0	0	0	566142	1140197	0	0	0	0	0	0	0	0
XLOC_000511|PGSC0003DMT400041092	PGSC0003DMB000000003:1771279-1777328	501738	569311	287125	919257	451277	296465	382777	327718	303156	386126	632232	273889	416252	297379	248336	238946
XLOC_000513|PGSC0003DMT400041089	PGSC0003DMB000000003:1807178-1819840	259659	0	0	0	0	0	697451	875985	0	0	0	0	0	0	0	0
XLOC_000517|PGSC0003DMT400055113,PGSC0003DMT400055114	PGSC0003DMB000000003:2149955-2153559	955959	963125	809376	538057	840263	624507	775719	647296	733429	732846	218361	511183	617275	651154	344992	412251
XLOC_000537|-	PGSC0003DMB000000003:3321711-3331579	0	0	0	0	0	0	0	0	0	0	0	0	0	0	0	0
XLOC_000546|PGSC0003DMT400074477,PGSC0003DMT400074478,PGSC0003DMT400074479	PGSC0003DMB000000003:3935378-3939149	716515	86369	515783	175768	558737	846273	455727	487081	678214	439973	678962	409183	114488	460229	580933	580857
XLOC_000548|PGSC0003DMT400074468,PGSC0003DMT400074469	PGSC0003DMB000000003:4038288-4046212	429377	310075	224798	486613	649459	276927	443364	307733	297742	211923	359396	11266	360202	462235	308677	221618
XLOC_000549|-	PGSC0003DMB000000003:4111325-4114199	0	0	0	0	0	0	0	0	0	0	0	0	0	0	0	0
XLOC_000550|-	PGSC0003DMB000000003:4115111-4200467	399596	19283	30916	680418	40862	279013	209974	2429716	177297	393807	0	0	0	0	202125	389862
XLOC_000552|PGSC0003DMT400043522	PGSC0003DMB000000003:4310780-4312103	0	0	0	0	0	0	180267	391492	0	0	0	0	0	0	0	0
XLOC_000565|PGSC0003DMT400070573,PGSC0003DMT400070574,PGSC0003DMT400070575,PGSC0003DMT400070576,PGSC0003DMT400070577	PGSC0003DMB000000003:54189-59734	0	0	0	0	0	0	0	0	0	0	0	0	0	0	0	0
XLOC_000567|PGSC0003DMT400070582	PGSC0003DMB000000003:106552-113738	0	0	0	0	0	0	501875	921324	0	0	0	0	0	0	0	0
XLOC_000568|PGSC0003DMT400070583,PGSC0003DMT400070584	PGSC0003DMB000000003:124298-133675	0	0	0	0	0	0	0	0	0	0	0	0	0	0	0	0
XLOC_000570|-	PGSC0003DMB000000003:209338-226769	0	0	0	0	0	0	718186	473688	0	0	0	0	0	0	0	0
XLOC_000571|PGSC0003DMT400070587,PGSC0003DMT400070590,PGSC0003DMT400070591	PGSC0003DMB000000003:307995-321511	45758	472428	479319	115225	394377	555952	323588	356057	340671	427859	263088	236668	840999	40394	383325	350613
XLOC_000573|PGSC0003DMT400070593	PGSC0003DMB000000003:365116-378064	223943	231524	180471	1379614	22698	141498	225015	261477	302762	209719	2046759	351446	0	0	0	0
XLOC_000576|-	PGSC0003DMB000000003:558493-574076	310191	1848829	0	0	0	0	16,73	271777	0	0	0	0	0	0	0	0
XLOC_000577|PGSC0003DMT400070597,PGSC0003DMT400070598,PGSC0003DMT400070599	PGSC0003DMB000000003:657677-662649	804267	907861	581018	892472	559713	952565	591588	656383	701705	817679	526666	212677	838536	556108	614734	43191
XLOC_000581|-	PGSC0003DMB000000003:853772-858644	0	0	0	0	0	0	2599372	378475	0	0	0	0	548193	577046	433656	2407650
XLOC_000583|PGSC0003DMT400038718,PGSC0003DMT400038719,PGSC0003DMT400038720	PGSC0003DMB000000003:942268-948050	153723	212875	710997	162289	158727	143281	126543	113092	113652	109,29	64191	109155	938777	126754	945335	556023
XLOC_000587|PGSC0003DMT400038723,PGSC0003DMT400038724,PGSC0003DMT400038725	PGSC0003DMB000000003:1031382-1034371	142834	916586	0	0	143514	588783	844557	545808	0	0	0	0	0	0	0	0
XLOC_000588|PGSC0003DMT400038726	PGSC0003DMB000000003:1042262-1044294	326867	329614	0	0	156956	219277	232332	211856	268148	326776	0	0	391092	950022	0	0
XLOC_000589|-	PGSC0003DMB000000003:1074793-1100592	842979	545666	471154	44578	788062	841164	610459	617347	917612	416935	411296	49679	726444	702807	40,01	510813
XLOC_000592|PGSC0003DMT400038732,PGSC0003DMT400038733,PGSC0003DMT400038734,PGSC0003DMT400038735	PGSC0003DMB000000003:1171299-1177773	0	0	0	0	0	0	0	0	0	0	0	0	0	0	0	0
XLOC_000593|-	PGSC0003DMB000000003:1278037-1298973	758596	65541	813848	635484	997705	137609	732473	707833	550979	715454	367177	481829	464125	107059	795941	518131
XLOC_000595|PGSC0003DMT400036387,PGSC0003DMT400036388	PGSC0003DMB000000003:1338728-1345455	378271	454494	319193	203993	322852	377147	305819	30823	281778	394029	0	0	399263	21969	210561	255226
XLOC_000601|PGSC0003DMT400041085,PGSC0003DMT400041086	PGSC0003DMB000000003:1715161-1734284	668623	584167	546033	762933	658233	335743	344316	216875	489558	97699	273494	201531	251582	279107	912124	405987
XLOC_000625|PGSC0003DMT400055131	PGSC0003DMB000000003:3129602-3134679	0	0	0	0	0	0	0	0	0	0	0	0	0	0	0	0
XLOC_000645|-	PGSC0003DMB000000003:4533336-4545925	173318	154538	0	0	0	0	168422	204497	0	0	0	0	0	0	0	0
XLOC_000653|PGSC0003DMT400025955,PGSC0003DMT400025958	PGSC0003DMB000000004:138502-140573	0	0	0	0	0	0	0	0	0	0	0	0	0	0	0	0
XLOC_000655|PGSC0003DMT400026215	PGSC0003DMB000000004:242084-323383	834515	131694	467703	598034	481264	104,68	604079	627282	859695	361082	470587	814848	739372	44966	92283	347812
XLOC_000656|-	PGSC0003DMB000000004:242084-323383	595258	25212	0	0	0	0	224803	38922	23156	194396	0	0	536902	42387	637085	0
XLOC_000657|PGSC0003DMT400025972,PGSC0003DMT400025973,PGSC0003DMT400025974	PGSC0003DMB000000004:330461-333534	0	0	0	0	0	0	0	0	0	0	0	0	0	0	0	0
XLOC_000658|PGSC0003DMT400025976,PGSC0003DMT400025977	PGSC0003DMB000000004:340580-343060	0	0	0	0	0	0	0	0	0	0	0	0	0	0	0	0
XLOC_000660|PGSC0003DMT400025984	PGSC0003DMB000000004:367217-368425	339708	33075	0	0	0	0	0	0	0	0	0	0	0	0	0	0
XLOC_000661|PGSC0003DMT400026123	PGSC0003DMB000000004:376651-393275	0	0	0	0	0	0	0	0	0	0	0	0	0	0	0	0
XLOC_000663|PGSC0003DMT400025985	PGSC0003DMB000000004:434880-439805	0	0	0	0	0	0	0	0	0	0	0	0	0	0	0	0
XLOC_000665|PGSC0003DMT400025988	PGSC0003DMB000000004:449038-453516	207141	296232	245484	419596	219675	383966	11627	183436	390689	202063	33731	9782	0	0	0	0
XLOC_000667|-	PGSC0003DMB000000004:524404-527307	386843	343823	0	0	258321	271504	327074	455738	34715	304761	0	0	400738	2448069	0	0
XLOC_000668|PGSC0003DMT400026225	PGSC0003DMB000000004:527850-528566	212856	487482	140143	1162,01	327338	750832	396971	307075	837228	1445206	450756	207585	383978	561371	579378	450002
XLOC_000669|PGSC0003DMT400026226	PGSC0003DMB000000004:529372-529838	127519	685486	232498	1463,05	135764	1209,15	366613	769655	1106,59	240257	651,87	245989	619327	0	583247	124426
XLOC_000670|PGSC0003DMT400026000,PGSC0003DMT400026001	PGSC0003DMB000000004:534854-542450	614789	238191	727984	105712	781421	305684	366137	167391	703067	364037	616436	256746	0	0	498565	698868
XLOC_000671|PGSC0003DMT400026004,PGSC0003DMT400026005,PGSC0003DMT400026006	PGSC0003DMB000000004:545185-549719	403473	428314	342428	476253	302971	399912	309176	328261	262269	264081	0	0	0	0	240525	209951
XLOC_000672|PGSC0003DMT400026008	PGSC0003DMB000000004:553739-556665	0	0	0	0	0	0	0	0	0	0	0	0	0	0	0	0
XLOC_000673|PGSC0003DMT400026009	PGSC0003DMB000000004:568947-570503	221982	157505	763321	336371	249928	337283	180022	256,77	171513	118319	144217	721084	108928	217038	161397	328265
XLOC_000674|PGSC0003DMT400026010	PGSC0003DMB000000004:576320-579269	118707	459765	103142	767535	126773	113165	137298	128,38	574285	416538	0	322293	119868	805672	841503	501794
XLOC_000675|PGSC0003DMT400026012	PGSC0003DMB000000004:579819-583649	0	0	0	0	0	0	0	0	0	0	0	0	0	0	0	0
XLOC_000676|PGSC0003DMT400026013	PGSC0003DMB000000004:590897-591706	0	0	0	0	0	0	748929	240809	0	0	0	0	0	0	0	0
XLOC_000677|PGSC0003DMT400026170	PGSC0003DMB000000004:622880-628428	0	0	0	0	0	0	0	0	0	0	0	0	0	0	0	0
XLOC_000679|PGSC0003DMT400026019,PGSC0003DMT400026020,PGSC0003DMT400026021,PGSC0003DMT400026022	PGSC0003DMB000000004:669150-673992	25502	23736	219793	113137	304771	235862	882732	204353	165183	208461	0	0	1016015	364456	0	0
XLOC_000680|PGSC0003DMT400026023,PGSC0003DMT400026024,PGSC0003DMT400026025,PGSC0003DMT400026026	PGSC0003DMB000000004:681097-684839	13313	176395	0	0	0	0	898567	133238	0	0	0	0	0	0	0	0
XLOC_000681|PGSC0003DMT400026027,PGSC0003DMT400026028,PGSC0003DMT400026029,PGSC0003DMT400026030,PGSC0003DMT400026031,PGSC0003DMT400026032,PGSC0003DMT400026033	PGSC0003DMB000000004:693838-697642	179749	441051	154316	226405	0	300838	270008	202763	199832	0	12934	325304	475786	154524	553268	0
XLOC_000684|PGSC0003DMT400026038	PGSC0003DMB000000004:780975-783661	456951	360,06	333737	347042	352993	390682	432542	389607	282483	390424	146571	123253	215662	302684	221152	320143
XLOC_000685|PGSC0003DMT400026040	PGSC0003DMB000000004:784131-789714	0	0	0	0	0	0	0	0	0	0	0	0	0	0	0	0
XLOC_000686|PGSC0003DMT400026041,PGSC0003DMT400026042,PGSC0003DMT400026043	PGSC0003DMB000000004:791965-799022	455596	313809	271727	245588	283133	819252	467817	602212	349153	58219	516367	243872	706299	39969	24574	243405
XLOC_000687|PGSC0003DMT400026044,PGSC0003DMT400026045	PGSC0003DMB000000004:869573-870595	831038	322504	0	0	154875	239953	175667	335315	0	0	0	0	124349	994908	659757	517445
XLOC_000688|PGSC0003DMT400026046,PGSC0003DMT400026047	PGSC0003DMB000000004:892272-895552	0	0	0	0	0	0	0	0	0	0	0	0	0	0	0	0
XLOC_000689|PGSC0003DMT400026048,PGSC0003DMT400026049,PGSC0003DMT400026050,PGSC0003DMT400026051	PGSC0003DMB000000004:907539-913751	0	0	0	0	0	0	0	0	0	0	0	0	0	0	0	0
XLOC_000690|PGSC0003DMT400026052,PGSC0003DMT400026053	PGSC0003DMB000000004:919799-922702	461224	422579	657,27	130286	1820,96	349012	555452	410926	353222	710,92	128322	353762	298066	1508,98	168696	606776
XLOC_000693|PGSC0003DMT400026059	PGSC0003DMB000000004:941054-943600	22218	250932	14043	221404	170838	264799	169887	142968	0	0	0	0	311732	134771	0	0
XLOC_000695|PGSC0003DMT400026065,PGSC0003DMT400026067	PGSC0003DMB000000004:961825-966450	150881	387074	0	0	286791	136536	0	0	0	0	0	0	0	0	0	0
XLOC_000698|PGSC0003DMT400003750	PGSC0003DMB000000004:1014876-1015488	0	0	0	0	0	0	0	0	0	0	0	0	0	0	0	0
XLOC_000702|PGSC0003DMT400003740	PGSC0003DMB000000004:1060488-1067242	261838	428916	17,52	158342	240371	318078	141559	164915	447046	161451	555648	167106	0	0	0	0
XLOC_000703|PGSC0003DMT400003738,PGSC0003DMT400003739	PGSC0003DMB000000004:1088041-1097090	388308	419814	550575	354483	324249	343636	253617	316387	339908	401993	228775	234005	298082	245049	0	0
XLOC_000705|PGSC0003DMT400003737	PGSC0003DMB000000004:1129071-1131548	0	0	0	0	0	0	0	0	0	0	0	0	0	0	0	0
XLOC_000707|PGSC0003DMT400003732,PGSC0003DMT400003733,PGSC0003DMT400003734	PGSC0003DMB000000004:1140050-1145536	136682	1845542	0	0	574431	145241	0	0	0	0	0	0	0	0	0	0
XLOC_000708|PGSC0003DMT400003731	PGSC0003DMB000000004:1146890-1149441	309492	395318	1057652	402277	285569	509945	27829	247793	305765	481297	0	0	0	0	385571	186943
XLOC_000709|-	PGSC0003DMB000000004:1194042-1204864	157376	634783	0	0	1504740	165308	2200892	167954	0	0	0	0	0	0	0	0
XLOC_000711|PGSC0003DMT400003724	PGSC0003DMB000000004:1249919-1259635	323371	272396	0	0	512123	339951	229698	265179	310139	195388	825408	208111	0	0	192678	222235
XLOC_000712|PGSC0003DMT400003723	PGSC0003DMB000000004:1302198-1308798	0	0	0	191614	0	0	0	0	0	0	0	0	0	0	0	0
XLOC_000713|PGSC0003DMT400003719,PGSC0003DMT400003721,PGSC0003DMT400003722	PGSC0003DMB000000004:1310845-1316158	193587	124153	902371	330099	35744	221058	101227	637337	168499	884377	0	0	146756	269826	0	0
XLOC_000714|PGSC0003DMT400003718	PGSC0003DMB000000004:1347038-1347571	998629	391619	328746	432672	844652	671882	861368	20729	575519	90591	0	0	750609	790115	461829	703739
XLOC_000718|PGSC0003DMT400003706,PGSC0003DMT400003707,PGSC0003DMT400003709,PGSC0003DMT400003710,PGSC0003DMT400042052	PGSC0003DMB000000004:1437042-1447987	126659	183897	0	0	0	0	0	0	0	0	0	0	0	0	0	0
XLOC_000723|PGSC0003DMT400003687,PGSC0003DMT400003688	PGSC0003DMB000000004:1497545-1500625	0	0	0	0	0	0	0	0	0	0	0	0	0	0	0	0
XLOC_000724|PGSC0003DMT400003684,PGSC0003DMT400003685	PGSC0003DMB000000004:1501355-1505297	114226	943205	795253	761416	108,34	123,09	103816	808577	905617	111594	351432	490859	754219	736966	57941	106512
XLOC_000725|PGSC0003DMT400003681,PGSC0003DMT400003682,PGSC0003DMT400003683	PGSC0003DMB000000004:1506347-1513106	218334	132691	0	0	813493	15243	920904	988232	0	0	0	0	0	0	0	0
XLOC_000726|PGSC0003DMT400003672,PGSC0003DMT400003673,PGSC0003DMT400003676,PGSC0003DMT400003679,PGSC0003DMT400003680	PGSC0003DMB000000004:1517285-1528995	259421	344063	0	0	286476	431311	315174	364857	373821	396726	300227	181085	270822	225296	200368	647224
XLOC_000728|PGSC0003DMT400003667,PGSC0003DMT400003668,PGSC0003DMT400003669	PGSC0003DMB000000004:1543399-1545915	0	0	0	0	0	0	758541	2664020	0	0	0	0	0	0	0	0
XLOC_000729|PGSC0003DMT400003666	PGSC0003DMB000000004:1576926-1580037	412783	121175	0	0	163233	300393	296934	56918	577734	2113965	821552	583302	159564	2543825	553211	726743
XLOC_000730|PGSC0003DMT400003663	PGSC0003DMB000000004:1585021-1586779	0	0	0	0	0	0	0	0	0	0	0	0	0	0	0	0
XLOC_000733|PGSC0003DMT400003655,PGSC0003DMT400003657	PGSC0003DMB000000004:1596083-1601386	132439	228732	0	0	0	0	0	0	0	0	0	0	0	0	0	0
XLOC_000734|PGSC0003DMT400003653,PGSC0003DMT400003654	PGSC0003DMB000000004:1602177-1605471	835788	484514	318146	557729	71866	686083	395023	373327	854239	208905	484272	285975	721344	38197	483149	152094
XLOC_000735|PGSC0003DMT400003652	PGSC0003DMB000000004:1617082-1624499	47168	405784	227091	20117	571228	293264	377297	27881	353596	306875	332678	194062	332375	61227	0	0
XLOC_000736|PGSC0003DMT400003650,PGSC0003DMT400003651	PGSC0003DMB000000004:1654773-1664308	151121	148588	948084	275563	125567	166508	111064	121899	891916	843676	36628	59607	107896	926838	811159	575495
XLOC_000737|PGSC0003DMT400003646,PGSC0003DMT400003647,PGSC0003DMT400003648,PGSC0003DMT400003649	PGSC0003DMB000000004:1665879-1674616	442258	555936	225158	266024	44292	399477	400213	402041	264855	387267	0	0	368907	273715	161442	645842
XLOC_000741|PGSC0003DMT400003643	PGSC0003DMB000000004:1756827-1763043	0	0	0	0	154285	705375	0	0	0	0	0	0	0	0	0	0
XLOC_000745|PGSC0003DMT400003636,PGSC0003DMT400003637	PGSC0003DMB000000004:1793257-1796128	282699	560792	959274	60257	40417	106687	595249	268066	715634	943349	350614	184534	497787	686174	53792	279707
XLOC_000747|PGSC0003DMT400003631,PGSC0003DMT400003632	PGSC0003DMB000000004:1831006-1837899	0	0	194536	573199	162766	762957	904704	640783	0	0	0	0	0	0	0	0
XLOC_000749|PGSC0003DMT400003630	PGSC0003DMB000000004:1861575-1866475	145339	156205	922328	186473	127183	198723	134565	161158	173,87	119426	775975	775975	198,75	126862	137153	862318
XLOC_000750|PGSC0003DMT400003628,PGSC0003DMT400003629	PGSC0003DMB000000004:1873133-1900868	0	0	0	0	0	0	0	0	0	0	0	0	0	0	0	0
XLOC_000751|-	PGSC0003DMB000000004:1873133-1900868	0	0	0	0	1766283	0	0	0	0	0	0	0	0	0	0	0
XLOC_000752|PGSC0003DMT400003612,PGSC0003DMT400003613,PGSC0003DMT400003614,PGSC0003DMT400003615,PGSC0003DMT400003616,PGSC0003DMT400003617	PGSC0003DMB000000004:1911926-1914848	0	0	0	0	214486	10611	268759	145971	10642	16768	0	0	0	0	0	0
XLOC_000754|PGSC0003DMT400003611	PGSC0003DMB000000004:1988005-1996833	331028	396216	358189	491066	428279	408399	282624	357541	270609	470022	314643	189487	369211	401403	234642	205382
XLOC_000755|PGSC0003DMT400003608	PGSC0003DMB000000004:2002228-2004492	0	0	0	0	0	0	0	0	0	0	0	0	0	0	0	0
XLOC_000757|PGSC0003DMT400003601	PGSC0003DMB000000004:2030717-2032149	0	0	0	0	0	0	0	0	0	0	0	0	0	0	0	0
XLOC_000758|PGSC0003DMT400003598,PGSC0003DMT400003599,PGSC0003DMT400003600	PGSC0003DMB000000004:2055498-2062295	247307	26267	120695	265729	183786	436633	978624	111296	300411	933707	0	0	0	0	0	0
XLOC_000759|PGSC0003DMT400003595,PGSC0003DMT400003596,PGSC0003DMT400003597	PGSC0003DMB000000004:2115823-2119707	0	0	0	0	0	0	0	0	0	0	0	0	0	0	0	0
XLOC_000760|PGSC0003DMT400003592	PGSC0003DMB000000004:2125961-2128624	4716,27	3651,45	2089,2	3036,44	3812,42	4401	4146,75	4791,98	3290,41	3679,15	1671,72	1847,45	2446,6	3544,04	2839,69	2111,26
XLOC_000761|PGSC0003DMT400003336	PGSC0003DMB000000004:2147315-2150249	423416	0	0	0	0	0	533,02	692,15	0	0	0	0	477384	125627	251761	0
XLOC_000762|PGSC0003DMT400003588,PGSC0003DMT400003589,PGSC0003DMT400003590	PGSC0003DMB000000004:2157990-2165750	0	0	0	0	0	0	0	0	0	0	0	0	0	0	0	0
XLOC_000764|PGSC0003DMT400003584,PGSC0003DMT400003585,PGSC0003DMT400003586	PGSC0003DMB000000004:2217844-2219411	146815	174408	540809	555698	717248	287881	142881	175483	178595	89,9	254989	779917	344946	489819	146625	372578
XLOC_000766|PGSC0003DMT400003581	PGSC0003DMB000000004:2272727-2273791	0	0	0	0	0	0	1259663	1331615	0	0	0	0	0	0	0	0
XLOC_000767|PGSC0003DMT400003578,PGSC0003DMT400003579,PGSC0003DMT400003580	PGSC0003DMB000000004:2305501-2313214	546377	568243	407887	372528	492496	427406	376037	333765	387565	44578	261165	263175	380755	434324	0	0
XLOC_000770|PGSC0003DMT400003565,PGSC0003DMT400003566,PGSC0003DMT400003567,PGSC0003DMT400003568	PGSC0003DMB000000004:2329383-2337730	146926	2628926	0	0	0	0	100586	101888	0	0	0	0	0	0	0	0
XLOC_000771|PGSC0003DMT400003564	PGSC0003DMB000000004:2338023-2339031	448325	385262	254107	26603	37,77	42154	417149	327736	328584	445602	0	0	0	0	0	0
XLOC_000774|PGSC0003DMT400003562	PGSC0003DMB000000004:2382605-2386918	120818	154322	0	0	159967	2822778	178649	166594	0	0	0	246388	311354	2860550	0	0
XLOC_000781|PGSC0003DMT400003547,PGSC0003DMT400003548	PGSC0003DMB000000004:2472077-2478229	0	0	0	0	0	0	0	0	0	0	0	0	0	0	0	0
XLOC_000783|PGSC0003DMT400003544,PGSC0003DMT400003545	PGSC0003DMB000000004:2501245-2505153	0	0	0	0	0	0	0	0	0	0	0	0	0	0	0	0
XLOC_000785|PGSC0003DMT400003538,PGSC0003DMT400003539	PGSC0003DMB000000004:2524564-2533738	184875	230792	809179	19871	160742	213231	2599006	952002	0	0	0	0	0	0	0	0
XLOC_000786|PGSC0003DMT400003537	PGSC0003DMB000000004:2539534-2541105	0	0	0	0	0	0	0	0	0	0	0	0	0	0	0	0
XLOC_000787|PGSC0003DMT400003534	PGSC0003DMB000000004:2547868-2556775	151876	117486	259611	107,9	820322	108606	340422	189014	105412	0	229679	549351	0	0	0	0
XLOC_000788|PGSC0003DMT400003533	PGSC0003DMB000000004:2568612-2574431	180756	148172	0	0	246141	196711	111326	144332	132314	176139	0	0	0	0	0	0
XLOC_000789|PGSC0003DMT400003530,PGSC0003DMT400003531,PGSC0003DMT400003532	PGSC0003DMB000000004:2580389-2584189	389321	153344	0	0	10777	2942730	0	0	0	0	0	0	0	0	0	0
XLOC_000790|PGSC0003DMT400003528,PGSC0003DMT400003529	PGSC0003DMB000000004:2591111-2594969	665916	905474	689308	409479	102199	102527	754991	545832	473922	600795	344636	189753	682815	797936	845085	770287
XLOC_000791|PGSC0003DMT400003523,PGSC0003DMT400003524,PGSC0003DMT400003525,PGSC0003DMT400003526,PGSC0003DMT400003527	PGSC0003DMB000000004:2595637-2603052	0	0	0	0	154018	2922976	776612	440726	0	0	0	0	0	0	0	0
XLOC_000792|-	PGSC0003DMB000000004:2621982-2632161	108221	978996	348651	303844	87253	158146	775966	824403	803831	428912	289842	250312	805535	698296	109362	199915
XLOC_000793|-	PGSC0003DMB000000004:2633932-2637987	346559	468794	295358	490469	37603	487446	439131	225581	19671	371566	0	0	453802	274673	299157	351009
XLOC_000802|PGSC0003DMT400001416,PGSC0003DMT400001418	PGSC0003DMB000000004:2856545-2865751	466609	219574	0	0	292149	345969	177149	217925	37455	725503	0	0	300603	435093	0	0
XLOC_000803|PGSC0003DMT400001411,PGSC0003DMT400001412,PGSC0003DMT400001413,PGSC0003DMT400001414	PGSC0003DMB000000004:2876588-2886372	255473	28,32	245664	100539	250134	29103	243819	232606	198029	312015	0	0	312638	230823	625266	251042
XLOC_000804|PGSC0003DMT400001410	PGSC0003DMB000000004:2886653-2890355	332392	348937	0	0	259515	265413	175242	278638	187877	264419	0	0	345931	232644	0	0
XLOC_000806|PGSC0003DMT400001405	PGSC0003DMB000000004:2912882-2915125	0	0	0	0	0	0	0	0	0	0	0	0	0	0	0	0
XLOC_000807|-	PGSC0003DMB000000004:2950381-2960508	356898	383501	199689	493672	282262	34736	354707	297659	164649	225618	0	0	494782	407916	237285	180411
XLOC_000808|PGSC0003DMT400001400,PGSC0003DMT400001401	PGSC0003DMB000000004:2975422-2978638	0	0	0	0	0	0	180849	737791	0	0	0	0	0	0	0	0
XLOC_000809|PGSC0003DMT400001399	PGSC0003DMB000000004:2990253-2991409	111367	209632	0	0	171265	181969	415394	161819	208591	404108	0	0	0	0	0	0
XLOC_000811|PGSC0003DMT400001396	PGSC0003DMB000000004:3050970-3054684	0	0	0	0	0	0	0	0	0	0	0	0	0	0	0	0
XLOC_000812|PGSC0003DMT400001392	PGSC0003DMB000000004:3055758-3062467	695355	109282	165563	338058	459638	198256	282125	680531	149,1	251397	113038	231811	551221	449555	151529	2380987
XLOC_000813|PGSC0003DMT400001390,PGSC0003DMT400001391	PGSC0003DMB000000004:3064033-3073415	39778	169778	301485	739501	307422	368101	267842	241949	329872	43,05	359577	202986	0	0	11551	277862
XLOC_000814|PGSC0003DMT400001388,PGSC0003DMT400001389	PGSC0003DMB000000004:3097295-3106322	0	0	0	0	0	0	0	0	0	0	0	0	0	0	0	0
XLOC_000815|PGSC0003DMT400001383,PGSC0003DMT400001384	PGSC0003DMB000000004:3113341-3117680	398426	379681	590224	534064	413583	465287	104491	148867	626432	325288	31224	374691	0	0	319822	789687
XLOC_000817|PGSC0003DMT400001379,PGSC0003DMT400001380,PGSC0003DMT400001381	PGSC0003DMB000000004:3155493-3163842	619177	165114	0	0	14099	894838	897092	837224	0	0	0	0	0	0	0	0
XLOC_000820|PGSC0003DMT400032802,PGSC0003DMT400032803,PGSC0003DMT400032804	PGSC0003DMB000000004:3189847-3193236	282738	130941	556857	182912	176073	22465	267953	207923	194289	153233	235557	248092	0	0	0	0
XLOC_000821|PGSC0003DMT400032805,PGSC0003DMT400032806,PGSC0003DMT400032808	PGSC0003DMB000000004:3196056-3201826	216793	16105	0	0	137869	222678	860651	11109	175019	610656	0	0	0	0	0	0
XLOC_000822|PGSC0003DMT400032809	PGSC0003DMB000000004:3269967-3270547	0	0	0	0	0	0	0	0	0	0	0	0	0	0	0	0
XLOC_000823|PGSC0003DMT400032810,PGSC0003DMT400032811	PGSC0003DMB000000004:3298847-3302617	183831	248713	0	0	1063435	234801	2565404	174691	206202	375222	0	0	0	0	0	0
XLOC_000825|PGSC0003DMT400032814,PGSC0003DMT400032815,PGSC0003DMT400032816,PGSC0003DMT400032818	PGSC0003DMB000000004:3311978-3322604	865911	834303	810623	145291	92521	868381	843243	940494	73568	84293	17134	329877	921645	827779	500927	46254
XLOC_000826|PGSC0003DMT400032819,PGSC0003DMT400032820,PGSC0003DMT400032821,PGSC0003DMT400032822,PGSC0003DMT400032823	PGSC0003DMB000000004:3325860-3328836	175408	22984	144973	262727	262996	315912	152175	241269	144204	235329	0	0	338869	155872	280451	142428
XLOC_000827|PGSC0003DMT400032824,PGSC0003DMT400032827	PGSC0003DMB000000004:3340701-3345238	143019	817032	0	0	263222	686911	934205	737533	41691	181226	0	0	0	0	0	0
XLOC_000829|PGSC0003DMT400032830,PGSC0003DMT400032831,PGSC0003DMT400032832,PGSC0003DMT400032833	PGSC0003DMB000000004:3365938-3369507	0	0	163867	175914	479157	261989	492489	143095	0	0	0	0	0	0	25713	815743
XLOC_000831|PGSC0003DMT400032835,PGSC0003DMT400032836	PGSC0003DMB000000004:3396890-3402992	251265	297067	0	0	347417	21753	19306	263532	0	0	0	0	0	0	0	0
XLOC_000833|PGSC0003DMT400032840	PGSC0003DMB000000004:3411094-3414779	0	0	0	0	164835	206043	154922	200241	0	0	0	0	0	0	0	0
XLOC_000834|PGSC0003DMT400032841,PGSC0003DMT400032842	PGSC0003DMB000000004:3417981-3423179	1291834	246828	14032	125893	217015	167283	789532	134424	21719	491119	556629	966359	0	0	247659	662942
XLOC_000835|PGSC0003DMT400032843,PGSC0003DMT400032844	PGSC0003DMB000000004:3424309-3425459	0	0	0	0	0	0	0	0	0	0	0	0	0	0	0	0
XLOC_000837|PGSC0003DMT400032846	PGSC0003DMB000000004:3445893-3446929	0	0	0	0	0	0	0	0	0	0	0	0	0	0	0	0
XLOC_000840|PGSC0003DMT400032851	PGSC0003DMB000000004:3469105-3470202	0	0	0	193471	0	0	0	0	0	0	0	0	0	0	0	0
XLOC_000843|PGSC0003DMT400032854,PGSC0003DMT400032855	PGSC0003DMB000000004:3494622-3501841	188102	177037	0	0	0	0	1478350	974963	0	0	0	0	0	0	0	0
XLOC_000845|PGSC0003DMT400032859,PGSC0003DMT400032860,PGSC0003DMT400032861	PGSC0003DMB000000004:3509882-3511806	0	0	0	329745	0	0	0	0	0	0	0	0	0	0	0	0
XLOC_000846|PGSC0003DMT400032862	PGSC0003DMB000000004:3514107-3517691	112956	109534	419175	1452,63	900128	158904	727738	895243	843313	428506	311879	386273	617473	528102	82767	217094
XLOC_000848|PGSC0003DMT400032865	PGSC0003DMB000000004:3533274-3534074	0	0	0	0	0	0	0	0	0	0	0	0	0	0	0	0
XLOC_000849|PGSC0003DMT400052253,PGSC0003DMT400052255	PGSC0003DMB000000004:3554290-3556620	0	0	0	0	0	0	0	0	0	0	0	0	0	0	0	0
XLOC_000850|PGSC0003DMT400052251	PGSC0003DMB000000004:3595825-3603174	148745	181869	114896	432421	134184	159688	914558	121573	947163	162644	965842	582836	137757	108755	112133	673851
XLOC_000851|PGSC0003DMT400052250	PGSC0003DMB000000004:3604083-3610819	517216	630814	570033	310,76	667214	519539	530632	423821	331144	685314	124875	245,06	452748	514209	357898	394476
XLOC_000852|PGSC0003DMT400052246,PGSC0003DMT400052247,PGSC0003DMT400052248,PGSC0003DMT400052249	PGSC0003DMB000000004:3612218-3625167	0	0	0	0	0	0	0	0	0	0	0	0	0	0	0	0
XLOC_000853|PGSC0003DMT400052242	PGSC0003DMB000000004:3637379-3640618	0	0	0	0	0	0	0	0	0	0	0	0	0	0	0	0
XLOC_000857|PGSC0003DMT400052239,PGSC0003DMT400052240	PGSC0003DMB000000004:3686315-3689065	268835	76275	329586	235043	0	117342	0,779978	46759	925581	0	232472	950169	926265	0	111866	686587
XLOC_000860|PGSC0003DMT400052234,PGSC0003DMT400052235	PGSC0003DMB000000004:3743037-3750712	0	0	0	0	0	0	0	0	0	0	0	0	0	0	0	0
XLOC_000861|PGSC0003DMT400052233	PGSC0003DMB000000004:3754089-3754993	0	0	0	0	0	0	0	0	0	0	0	0	0	0	0	0
XLOC_000862|PGSC0003DMT400052231,PGSC0003DMT400052232	PGSC0003DMB000000004:3779456-3782526	108389	109696	770128	183086	135998	761542	112795	104162	791482	836946	235491	529854	148224	60042	809615	483908
XLOC_000867|PGSC0003DMT400052223,PGSC0003DMT400052224	PGSC0003DMB000000004:3856946-3860993	161208	168,68	669928	200388	126249	811286	997343	114006	733008	860112	2547173	37051	753218	120454	687514	651865
XLOC_000868|PGSC0003DMT400052219,PGSC0003DMT400052220,PGSC0003DMT400052221	PGSC0003DMB000000004:3861961-3867743	133903	138288	0	0	224771	156907	12003	902958	0	0	0	0	0	0	0	0
XLOC_000869|PGSC0003DMT400052217	PGSC0003DMB000000004:3868341-3869622	0	0	0	0	0	0	0	0	0	0	0	0	0	0	0	0
XLOC_000870|PGSC0003DMT400052214,PGSC0003DMT400052215,PGSC0003DMT400052216	PGSC0003DMB000000004:3875390-3877119	0	0	0	0	0	0	924521	665562	0	0	0	0	275437	120778	0	0
XLOC_000871|PGSC0003DMT400052213	PGSC0003DMB000000004:3896756-3900988	183097	187993	140,55	239341	181423	174584	191205	233,22	169972	118911	120008	887018	121984	133343	131137	151756
XLOC_000873|PGSC0003DMT400052211	PGSC0003DMB000000004:3928621-3931313	0	0	0	0	204008	850035	927772	0	0	0	0	0	0	0	1810814	233714
XLOC_000875|PGSC0003DMT400052205,PGSC0003DMT400052206	PGSC0003DMB000000004:3959263-3966138	174225	282092	550201	868518	687843	186144	285936	21767	132872	727707	0	0	924229	340507	758417	29245
XLOC_000879|PGSC0003DMT400052194,PGSC0003DMT400052197	PGSC0003DMB000000004:3979962-3987622	354557	348658	290385	167968	431345	287952	249928	250884	293023	456032	0	0	252822	306054	0	0
XLOC_000881|PGSC0003DMT400052188,PGSC0003DMT400052189,PGSC0003DMT400052190	PGSC0003DMB000000004:4021163-4024275	146102	231908	0	0	257177	2161415	13845	1129210	1886814	276341	0	0	0	0	530097	267163
XLOC_000882|PGSC0003DMT400052187	PGSC0003DMB000000004:4026159-4030045	398386	424287	207075	272537	22249	120918	293281	228498	1819610	399439	0	0	0	0	997382	288133
XLOC_000883|PGSC0003DMT400052182,PGSC0003DMT400052183,PGSC0003DMT400052184,PGSC0003DMT400052185	PGSC0003DMB000000004:4037036-4040947	17726	166625	629094	474737	524767	152,95	509126	524429	160665	551312	154399	0	0	0	134263	134235
XLOC_000884|PGSC0003DMT400052179,PGSC0003DMT400052180,PGSC0003DMT400052181	PGSC0003DMB000000004:4044116-4052474	237507	303004	289866	320019	308667	348962	204815	157965	293768	382936	220339	1034703	280284	12736	0	0
XLOC_000885|PGSC0003DMT400052172,PGSC0003DMT400052173,PGSC0003DMT400052174,PGSC0003DMT400052175,PGSC0003DMT400052176,PGSC0003DMT400052177,PGSC0003DMT400052178	PGSC0003DMB000000004:4052611-4055244	170117	1334871	0	0	0	0	799411	349196	0	0	0	0	0	0	0	0
XLOC_000889|PGSC0003DMT400052159,PGSC0003DMT400052165	PGSC0003DMB000000004:4216770-4231060	383449	156825	180074	342802	329231	411476	239529	201334	356373	24574	1585123	243981	0	0	232263	160051
XLOC_000890|-	PGSC0003DMB000000004:4232110-4246157	228109	246152	0	0	256219	228853	830172	149293	0	0	0	0	41759	244842	0	0
XLOC_000894|PGSC0003DMT400052144	PGSC0003DMB000000004:4308859-4329670	189402	143567	0	0	154802	149942	120307	118248	184274	141141	0	0	0	0	0	0
XLOC_000897|PGSC0003DMT400052139	PGSC0003DMB000000004:4437073-4452781	276677	289591	486182	153755	382934	313613	248235	236183	160826	548981	0	0	238219	271745	2644296	390749
XLOC_000898|-	PGSC0003DMB000000004:32242-54124	144696	351268	0	0	175194	320864	172664	818179	169927	172079	0	0	0	0	0	0
XLOC_000899|PGSC0003DMT400026072,PGSC0003DMT400026073,PGSC0003DMT400026074,PGSC0003DMT400026075	PGSC0003DMB000000004:112205-115891	148923	568387	0	0	0	0	926504	711177	0	0	0	0	0	0	0	0
XLOC_000901|PGSC0003DMT400026079,PGSC0003DMT400026080	PGSC0003DMB000000004:140688-146639	0	0	0	0	0	0	0	0	0	0	0	0	0	0	0	0
XLOC_000905|-	PGSC0003DMB000000004:189011-189480	0	0	0	0	137461	515478	45843	371083	0	0	0	0	0	0	0	0
XLOC_000906|PGSC0003DMT400026091,PGSC0003DMT400026093	PGSC0003DMB000000004:189859-195052	0	0	0	0	134414	763714	0	0	0	0	0	0	0	0	0	0
XLOC_000907|PGSC0003DMT400026094,PGSC0003DMT400026095	PGSC0003DMB000000004:202175-205625	568997	509404	246704	541157	46099	288118	524119	60927	287928	356026	0	0	312937	181949	247558	137919
XLOC_000908|PGSC0003DMT400026096	PGSC0003DMB000000004:224037-226416	0	0	0	0	0	0	0	0	0	0	0	0	0	0	0	0
XLOC_000909|PGSC0003DMT400026215	PGSC0003DMB000000004:242084-323383	232815	312506	558248	937351	672028	326453	214126	28207	186309	613664	0	0	15226	51,95	700644	595864
XLOC_000912|PGSC0003DMT400026117,PGSC0003DMT400026118,PGSC0003DMT400026119	PGSC0003DMB000000004:351231-355434	187456	150761	0	0	202065	579125	659741	839206	0	0	0	0	0	0	0	0
XLOC_000917|PGSC0003DMT400026128,PGSC0003DMT400026129	PGSC0003DMB000000004:376651-393275	0	0	0	0	0	0	0	0	0	0	0	0	0	0	0	0
XLOC_000919|PGSC0003DMT400026135,PGSC0003DMT400026136	PGSC0003DMB000000004:403006-411375	0	0	0	0	218246	874778	156093	789851	315615	166626	0	0	0	0	0	0
XLOC_000922|PGSC0003DMT400026138	PGSC0003DMB000000004:428591-430384	0	0	0	0	0	0	0	0	0	0	0	0	0	0	0	0
XLOC_000925|PGSC0003DMT400026148,PGSC0003DMT400026149,PGSC0003DMT400026150,PGSC0003DMT400026151,PGSC0003DMT400026152	PGSC0003DMB000000004:463451-471280	868003	202148	17117	184275	19866	289999	309593	168959	261995	234363	239576	470091	0	0	242428	23009
XLOC_000927|-	PGSC0003DMB000000004:524404-527307	525868	48452	353649	621275	0	206525	0,625999	262472	461111	0	0	0	672924	0	0	0
XLOC_000930|PGSC0003DMT400026159,PGSC0003DMT400026160,PGSC0003DMT400026161,PGSC0003DMT400026162,PGSC0003DMT400026163,PGSC0003DMT400026164,PGSC0003DMT400026165,PGSC0003DMT400026166,PGSC0003DMT400026167	PGSC0003DMB000000004:570975-574715	196163	213889	613748	359238	703807	247119	651121	378362	0	0	0	0	0	0	246284	834709
XLOC_000931|PGSC0003DMT400026168	PGSC0003DMB000000004:596542-601335	0	0	0	0	0	0	0	0	0	0	0	0	0	0	0	0
XLOC_000935|PGSC0003DMT400097775	PGSC0003DMB000000004:677254-679649	0	0	0	0	0	0	0	0	0	0	0	0	0	0	0	0
XLOC_000938|PGSC0003DMT400026178	PGSC0003DMB000000004:713062-715560	312954	387811	446591	366694	622627	44285	329893	234188	341484	326367	219975	157172	29583	595162	252653	181994
XLOC_000939|PGSC0003DMT400026179,PGSC0003DMT400026180,PGSC0003DMT400026181	PGSC0003DMB000000004:737977-740305	183661	312319	167954	233633	421461	953645	894807	688811	11807	319786	0	0	0	0	767312	319818
XLOC_000940|PGSC0003DMT400026187,PGSC0003DMT400026188,PGSC0003DMT400026189	PGSC0003DMB000000004:812642-817327	394136	414085	0	0	308822	356876	356467	294806	190634	173395	320449	264338	472905	377376	0	0
XLOC_000941|PGSC0003DMT400026190,PGSC0003DMT400026191,PGSC0003DMT400026192	PGSC0003DMB000000004:818148-820573	868964	424956	0	0	266,85	832482	323637	144198	286298	327631	754978	272129	905196	122003	238693	0
XLOC_000944|PGSC0003DMT400094545	PGSC0003DMB000000004:835996-839491	294356	137123	0	0	0	0	665258	792839	0	0	0	0	0	0	0	0
XLOC_000948|PGSC0003DMT400026202	PGSC0003DMB000000004:858307-861729	0	0	0	0	0	0	0	0	0	0	0	0	0	0	0	0
XLOC_000950|PGSC0003DMT400026205	PGSC0003DMB000000004:876123-878078	19432	199516	0	0	0	0	0	0	0	0	0	0	0	0	0	0
XLOC_000951|PGSC0003DMT400026206,PGSC0003DMT400026207,PGSC0003DMT400026208,PGSC0003DMT400026209	PGSC0003DMB000000004:923166-928726	134226	102022	100996	816745	107,3	897433	862989	770324	964435	141,85	466934	585387	901622	953618	708706	954118
XLOC_000955|PGSC0003DMT400003517,PGSC0003DMT400003518	PGSC0003DMB000000004:1017847-1023767	237345	187018	0	0	0	0	1427308	206232	193247	1924404	0	0	0	0	0	0
XLOC_000956|PGSC0003DMT400003515,PGSC0003DMT400003516	PGSC0003DMB000000004:1028702-1044202	356034	490021	0	0	0	0	137887	287312	274459	2940842	0	0	0	0	0	0
XLOC_000957|-	PGSC0003DMB000000004:1067291-1084042	0	0	0	0	1423657	146111	682275	855226	0	0	0	0	0	0	0	0
XLOC_000958|PGSC0003DMT400003509,PGSC0003DMT400003510	PGSC0003DMB000000004:1088041-1097090	414863	270318	453838	622197	309181	358871	294605	447135	821402	260546	0	0	287841	628889	11385	506001
XLOC_000959|PGSC0003DMT400003507,PGSC0003DMT400003508	PGSC0003DMB000000004:1101845-1106807	145438	684416	0	0	0	0	634528	810353	0	0	0	0	0	0	0	0
XLOC_000962|PGSC0003DMT400003490,PGSC0003DMT400003494	PGSC0003DMB000000004:1155735-1178937	493738	29265	385828	373699	67297	415223	37878	214384	368818	46231	429185	121703	244921	435444	899419	422563
XLOC_000963|PGSC0003DMT400003487	PGSC0003DMB000000004:1184711-1186531	130301	313805	0	0	392513	172388	964885	429040	198778	625781	0	0	172834	491213	0	0
XLOC_000964|PGSC0003DMT400003486	PGSC0003DMB000000004:1205052-1208100	223461	262895	0	0	257735	20404	156281	900963	0	0	0	0	0	0	0	0
XLOC_000969|PGSC0003DMT400003477	PGSC0003DMB000000004:1264434-1267284	0	0	0	0	0	0	331187	169563	0	0	0	0	0	0	0	0
XLOC_000970|PGSC0003DMT400003474,PGSC0003DMT400003475,PGSC0003DMT400003476	PGSC0003DMB000000004:1291164-1293599	0	0	0	0	0	0	0	0	0	0	0	0	0	0	0	0
XLOC_000971|PGSC0003DMT400003472,PGSC0003DMT400003473	PGSC0003DMB000000004:1297708-1298710	613026	396734	484335	1399,37	0	246261	0,857458	20996	228254	333665	491941	768658	368619	242312	261594	0
XLOC_000972|PGSC0003DMT400003469,PGSC0003DMT400003470,PGSC0003DMT400003471	PGSC0003DMB000000004:1302198-1308798	198775	14835	206035	372799	0	0	0	0	0	0	0	0	0	0	0	0
XLOC_000973|PGSC0003DMT400003467	PGSC0003DMB000000004:1316233-1319762	382033	241773	0	0	164096	41024	248754	258409	273313	172086	0	0	594105	187612	344649	250654
XLOC_000974|PGSC0003DMT400003463,PGSC0003DMT400003464,PGSC0003DMT400003465	PGSC0003DMB000000004:1321767-1326532	0	0	0	0	0	0	0	0	0	0	0	0	0	0	0	0
XLOC_000975|PGSC0003DMT400003461,PGSC0003DMT400003462	PGSC0003DMB000000004:1332249-1335307	816016	309227	0	0	594427	256347	756919	160469	200487	701291	0	0	0	0	0	0
XLOC_000976|PGSC0003DMT400003460	PGSC0003DMB000000004:1337301-1337960	0	0	0	0	148462	556732	191296	400781	139091	262728	0	0	0	0	669687	850397
XLOC_000977|PGSC0003DMT400003459	PGSC0003DMB000000004:1338386-1339471	0	0	0	0	0	0	0	0	0	0	0	0	0	0	0	0
XLOC_000978|PGSC0003DMT400003458	PGSC0003DMB000000004:1340029-1345490	119272	159,58	859191	189,56	162922	135163	929014	106313	105128	840129	723327	64513	101955	129842	106215	86524
XLOC_000979|PGSC0003DMT400003457	PGSC0003DMB000000004:1348289-1350332	860689	106781	710916	203404	104685	699403	123,67	657782	372017	119246	261623	425138	141148	928604	74438	661671
XLOC_000980|PGSC0003DMT400003455	PGSC0003DMB000000004:1353714-1358766	238724	275095	0	0	0	0	595838	191571	0	0	0	0	0	0	0	0
XLOC_000981|PGSC0003DMT400003453,PGSC0003DMT400003454	PGSC0003DMB000000004:1391054-1392839	0	0	0	0	0	0	0	0	0	0	0	0	0	0	0	0
XLOC_000982|PGSC0003DMT400003448,PGSC0003DMT400003449,PGSC0003DMT400003450,PGSC0003DMT400003451	PGSC0003DMB000000004:1400232-1405816	164223	165186	209577	826084	221067	2124922	0	0	675313	177891	0	0	0	0	0	0
XLOC_000983|PGSC0003DMT400003446,PGSC0003DMT400003447	PGSC0003DMB000000004:1406318-1412499	58724	282899	557417	432936	541109	355246	533393	496008	292107	56713	806953	403517	451858	554921	294399	158866
XLOC_000985|PGSC0003DMT400003443	PGSC0003DMB000000004:1474430-1475239	0	0	0	0	0	0	0	0	0	0	0	0	0	0	0	0
XLOC_000986|-	PGSC0003DMB000000004:1546868-1553629	0	0	0	0	0	0	0	0	0	0	0	0	0	0	0	0
XLOC_000987|-	PGSC0003DMB000000004:1556287-1560809	267818	693175	0	0	0	0	0	0	0	0	0	0	0	0	0	0
XLOC_000989|PGSC0003DMT400003437	PGSC0003DMB000000004:1564651-1569819	113243	113808	871957	350216	110688	107921	765137	80081	871097	762632	481337	689909	779047	964317	601352	77098
XLOC_000991|PGSC0003DMT400003431,PGSC0003DMT400003432,PGSC0003DMT400003433	PGSC0003DMB000000004:1629033-1632625	187571	191248	28404	182853	302877	243383	183653	321213	270247	356649	0	0	0	0	23545	991209
XLOC_000992|PGSC0003DMT400003429	PGSC0003DMB000000004:1633191-1637591	0	0	0	0	0	0	336651	749527	0	0	0	0	0	0	0	0
XLOC_000993|PGSC0003DMT400003425,PGSC0003DMT400003426,PGSC0003DMT400003427	PGSC0003DMB000000004:1641790-1645069	201838	320566	760976	672267	197877	421944	768651	180775	314871	192253	0	0	0	0	28,57	1628557
XLOC_000994|PGSC0003DMT400003422,PGSC0003DMT400003423,PGSC0003DMT400003424	PGSC0003DMB000000004:1674814-1678130	0	0	0	0	178533	1256344	1412668	121844	169112	977321	0	0	0	0	0	0
XLOC_000997|PGSC0003DMT400003412,PGSC0003DMT400003414	PGSC0003DMB000000004:1707695-1725674	539876	485796	558859	439867	847096	305693	431935	427841	245966	665574	671891	277715	639475	407086	180269	385218
XLOC_000998|PGSC0003DMT400003411	PGSC0003DMB000000004:1707695-1725674	0	0	0	0	0	0	0	0	0	0	0	0	0	0	0	0
XLOC_001003|PGSC0003DMT400003400,PGSC0003DMT400003401,PGSC0003DMT400003402	PGSC0003DMB000000004:1820996-1830429	0	0	0	0	705051	139297	0	0	0	0	0	0	0	0	0	0
XLOC_001004|PGSC0003DMT400003392,PGSC0003DMT400003393,PGSC0003DMT400003394,PGSC0003DMT400003395,PGSC0003DMT400003396,PGSC0003DMT400003397,PGSC0003DMT400003399	PGSC0003DMB000000004:1838392-1841964	0	0	0	0	0	0	600446	17469	101208	169908	0	0	0	0	0	0
XLOC_001005|PGSC0003DMT400003391	PGSC0003DMB000000004:1850372-1853233	0	0	0	0	0	0	151478	269755	0	0	0	0	0	0	0	0
XLOC_001006|PGSC0003DMT400003387	PGSC0003DMB000000004:1859074-1860568	0	0	0	0	0	0	0	0	0	0	0	0	0	0	0	0
XLOC_001007|PGSC0003DMT400003383,PGSC0003DMT400003384,PGSC0003DMT400003385	PGSC0003DMB000000004:1901181-1908215	0	0	0	0	0	0	683414	1341750	0	0	0	0	0	0	0	0
XLOC_001009|PGSC0003DMT400003380,PGSC0003DMT400003381	PGSC0003DMB000000004:1949164-1950800	0	0	0	0	0	0	0	0	0	0	0	0	0	0	0	0
XLOC_001010|PGSC0003DMT400003379	PGSC0003DMB000000004:1962204-1963092	0	0	0	0	0	0	0	0	0	0	0	0	0	0	0	0
XLOC_001013|PGSC0003DMT400003364	PGSC0003DMB000000004:2006901-2007839	0	0	0	0	0	0	0	0	0	0	0	0	0	0	0	0
XLOC_001016|PGSC0003DMT400003359,PGSC0003DMT400003360	PGSC0003DMB000000004:2016984-2021247	29068	208957	48795	723535	410091	232266	226785	2648709	186774	517895	0	0	836801	328219	767813	224689
XLOC_001019|PGSC0003DMT400003355,PGSC0003DMT400003356	PGSC0003DMB000000004:2063370-2070557	130017	168259	201165	213836	224943	149959	1197206	717267	181101	218201	0	0	0	0	0	0
XLOC_001023|PGSC0003DMT400003345,PGSC0003DMT400003346	PGSC0003DMB000000004:2119995-2124119	227152	260054	145455	221816	145634	235042	183737	188016	147695	171679	0	0	0	0	0	0
XLOC_001026|PGSC0003DMT400003337,PGSC0003DMT400003338,PGSC0003DMT400003339	PGSC0003DMB000000004:2138305-2142593	430328	490066	244015	52894	330168	582464	342703	493716	52432	272366	293248	323007	337513	266084	398249	291244
XLOC_001027|PGSC0003DMT400003336	PGSC0003DMB000000004:2147315-2150249	0	0	0	0	0	0	958672	131695	0	0	0	0	366829	965338	0	0
XLOC_001028|PGSC0003DMT400003334,PGSC0003DMT400003335	PGSC0003DMB000000004:2196085-2198225	0	0	0	0	0	0	0	0	0	0	0	0	0	0	0	0
XLOC_001031|PGSC0003DMT400003328	PGSC0003DMB000000004:2236849-2239350	983570	42802	0	0	143702	134721	132151	368536	323117	678147	0	0	0	0	234593	329246
XLOC_001034|PGSC0003DMT400003322,PGSC0003DMT400003323	PGSC0003DMB000000004:2256354-2262555	34,03	284684	362733	371447	288825	300812	323698	37694	333996	39725	231629	192001	282817	297061	198274	242305
XLOC_001035|PGSC0003DMT400003320	PGSC0003DMB000000004:2265323-2269886	126432	877444	32366	294687	638283	133,95	595857	938687	947613	846262	888382	347957	463257	61661	102329	390897
XLOC_001036|PGSC0003DMT400003317,PGSC0003DMT400003318,PGSC0003DMT400003319	PGSC0003DMB000000004:2274306-2277404	283764	97624	181994	55843	311157	319768	17716	557764	428616	397107	497365	111479	633212	230645	334277	321766
XLOC_001040|PGSC0003DMT400003309	PGSC0003DMB000000004:2324341-2328026	558011	438214	343334	484151	257767	483316	529269	405917	134265	236528	0	0	933238	318436	344517	26,25
XLOC_001041|PGSC0003DMT400003298,PGSC0003DMT400003300,PGSC0003DMT400003301,PGSC0003DMT400003302,PGSC0003DMT400003306	PGSC0003DMB000000004:2340162-2356877	25709	292937	110668	212675	248569	197077	815162	101237	24298	511821	211868	105831	0	0	0	0
XLOC_001043|PGSC0003DMT400003291	PGSC0003DMB000000004:2362686-2365782	0	0	0	0	0	0	0	0	0	0	0	0	0	0	0	0
XLOC_001049|PGSC0003DMT400003279	PGSC0003DMB000000004:2437346-2441868	0	0	0	0	0	0	0	0	0	0	0	0	0	0	0	0
XLOC_001050|PGSC0003DMT400003278	PGSC0003DMB000000004:2452279-2454657	0	0	0	0	2192126	151981	915972	2723189	0	0	0	0	0	0	0	0
XLOC_001052|PGSC0003DMT400003274	PGSC0003DMB000000004:2495952-2497357	419025	137573	288715	189993	526005	463626	175831	191151	303264	413712	0	0	131842	531994	0	0
XLOC_001053|PGSC0003DMT400003273	PGSC0003DMB000000004:2541403-2545003	100411	935225	106753	116929	115202	114579	85688	794746	97614	139571	561416	563229	807784	102039	55846	971226
XLOC_001054|PGSC0003DMT400096430	PGSC0003DMB000000004:2547868-2556775	0	0	0	0	0	0	0	0	0	0	0	0	0	0	0	0
XLOC_001056|PGSC0003DMT400003268,PGSC0003DMT400003269,PGSC0003DMT400003270	PGSC0003DMB000000004:2557506-2561996	0	0	0	0	0	0	636171	811516	0	0	0	0	0	0	0	0
XLOC_001057|PGSC0003DMT400003265,PGSC0003DMT400003267	PGSC0003DMB000000004:2563298-2566737	153568	113426	116123	654339	149205	119645	126074	113996	114731	166065	357056	45907	917311	121906	689364	903062
XLOC_001059|PGSC0003DMT400003263	PGSC0003DMB000000004:2588523-2589996	138155	208044	0	0	0	0	772964	163461	0	0	0	0	0	0	0	0
XLOC_001061|PGSC0003DMT400003262	PGSC0003DMB000000004:2603361-2607340	744706	717285	501049	600335	841485	472301	652031	471104	358349	485098	294544	355178	467374	655963	213799	317881
XLOC_001063|PGSC0003DMT400001376,PGSC0003DMT400001377	PGSC0003DMB000000004:2638084-2639182	0	0	51208	306745	0	0	404453	750286	0	0	162652	402861	0	0	0	0
XLOC_001064|PGSC0003DMT400001375	PGSC0003DMB000000004:2647150-2648575	0	0	0	0	0	0	0	0	0	0	0	0	0	0	0	0
XLOC_001065|PGSC0003DMT400001373	PGSC0003DMB000000004:2651525-2654741	0	0	0	0	0	0	948722	718939	0	0	0	0	0	0	0	0
XLOC_001067|PGSC0003DMT400001367	PGSC0003DMB000000004:2667274-2670542	502752	133081	0	0	304428	380536	210964	278832	224096	205233	0	0	0	0	0	0
XLOC_001068|-	PGSC0003DMB000000004:2670878-2685758	712211	77046	832668	101696	940533	807812	803521	856502	708176	858258	247881	295738	810392	544663	813313	274611
XLOC_001071|PGSC0003DMT400001350	PGSC0003DMB000000004:2725529-2750607	299285	1176051	316997	176023	357794	644401	252596	10257	121464	551939	0	0	137178	34947	600126	520698
XLOC_001072|PGSC0003DMT400001350	PGSC0003DMB000000004:2725529-2750607	0	0	0	0	0	0	0	0	0	0	0	0	0	0	0	0
XLOC_001074|PGSC0003DMT400001332,PGSC0003DMT400001334	PGSC0003DMB000000004:2767014-2771465	0	0	0	0	0	0	0	0	0	0	0	0	0	0	0	0
XLOC_001075|PGSC0003DMT400001329,PGSC0003DMT400001330,PGSC0003DMT400001331	PGSC0003DMB000000004:2772536-2778737	186885	729777	295444	0,775253	658608	2270988	165591	869584	824982	23,79	0	0	538039	650477	866127	299597
XLOC_001079|PGSC0003DMT400001325	PGSC0003DMB000000004:2806460-2810862	13436	343805	0	0	929811	203396	1601530	19,61	0	0	0	0	0	0	0	0
XLOC_001080|PGSC0003DMT400001322,PGSC0003DMT400001323,PGSC0003DMT400001324	PGSC0003DMB000000004:2814436-2818160	923007	382057	445548	0	49974	328785	774965	367402	199322	341337	784451	637096	299952	30842	32403	331549
XLOC_001082|PGSC0003DMT400001303	PGSC0003DMB000000004:2856545-2865751	262975	307542	212198	431467	286196	168493	197831	195133	155675	254992	276022	131304	213611	250913	112,52	174255
XLOC_001083|PGSC0003DMT400001409	PGSC0003DMB000000004:2886653-2890355	42540	158118	43138	163775	193768	266431	270235	340007	2565373	274324	0	0	0	0	199784	266379
XLOC_001086|PGSC0003DMT400001298	PGSC0003DMB000000004:2915965-2919976	290805	212958	630779	41235	243934	373527	1397389	157482	0	0	265188	889896	0	0	261987	232601
XLOC_001088|PGSC0003DMT400001296	PGSC0003DMB000000004:2933494-2934736	215066	111861	0	0	0	0	0	0	0	0	0	0	0	0	0	0
XLOC_001089|PGSC0003DMT400001289,PGSC0003DMT400001290,PGSC0003DMT400001291,PGSC0003DMT400001292,PGSC0003DMT400001293,PGSC0003DMT400001295	PGSC0003DMB000000004:2937135-2946184	194979	245849	0	0	0	0	179858	903212	0	0	0	0	0	0	0	0
XLOC_001090|PGSC0003DMT400001286,PGSC0003DMT400001287,PGSC0003DMT400001288	PGSC0003DMB000000004:2961110-2963371	224078	232614	0	0	12675	261305	140287	2321818	0	0	0	0	495385	325911	0	0
XLOC_001091|PGSC0003DMT400001284,PGSC0003DMT400001285	PGSC0003DMB000000004:2992502-2996327	182702	161935	0	0	59841	262649	1075581	180147	21873	1010536	0	0	0	0	0	0
XLOC_001092|PGSC0003DMT400001283	PGSC0003DMB000000004:3004616-3005549	34266	207324	0	0	47426	437562	383431	320073	380851	1708150	0	0	294351	503494	388084	580646
XLOC_001093|PGSC0003DMT400001282	PGSC0003DMB000000004:3008412-3009755	288096	42125	0	0	341778	275915	319497	249884	253496	100805	0	0	232012	329701	0	0
XLOC_001094|PGSC0003DMT400001279,PGSC0003DMT400001280,PGSC0003DMT400001281	PGSC0003DMB000000004:3010705-3016617	434509	42551	1932834	514319	332906	724836	372312	456567	412477	199265	371245	289025	314983	399022	341615	171884
XLOC_001097|PGSC0003DMT400001270,PGSC0003DMT400001271	PGSC0003DMB000000004:3081986-3086011	33556	389526	268599	480324	340966	298346	289448	211707	345736	28963	0	0	0	0	257805	249993
XLOC_001099|PGSC0003DMT400001262,PGSC0003DMT400001265,PGSC0003DMT400001266	PGSC0003DMB000000004:3088995-3094786	302236	34704	863427	189397	166221	357132	193622	175806	244054	234978	0	0	0	0	0	0
XLOC_001101|PGSC0003DMT400001259,PGSC0003DMT400001260,PGSC0003DMT400001261	PGSC0003DMB000000004:3120494-3123431	0	0	0	0	2906571	2018544	823593	809281	0	0	0	0	391064	2421529	0	0
XLOC_001102|PGSC0003DMT400001253,PGSC0003DMT400001254,PGSC0003DMT400001255,PGSC0003DMT400001256,PGSC0003DMT400001257,PGSC0003DMT400001258	PGSC0003DMB000000004:3123954-3129434	0	0	234964	229693	0	0	0	0	0	0	0	0	0	0	0	0
XLOC_001105|PGSC0003DMT400001248,PGSC0003DMT400001249	PGSC0003DMB000000004:3137769-3140588	101519	328435	213802	366895	380945	242321	14,99	169227	0	0	0	0	0	0	0	0
XLOC_001106|PGSC0003DMT400032868,PGSC0003DMT400032869,PGSC0003DMT400032870,PGSC0003DMT400032871	PGSC0003DMB000000004:3202206-3213207	156139	120554	0	0	18381	236873	986544	13838	121654	178886	0	0	0	0	464779	323809
XLOC_001108|PGSC0003DMT400032875,PGSC0003DMT400032877	PGSC0003DMB000000004:3224516-3226107	459392	171251	0	0	251832	1106595	139327	188845	0	0	0	0	0	0	0	0
XLOC_001109|PGSC0003DMT400032878,PGSC0003DMT400032879	PGSC0003DMB000000004:3232408-3237818	0	0	0	0	0	0	0	0	0	0	0	0	0	0	0	0
XLOC_001110|PGSC0003DMT400032880	PGSC0003DMB000000004:3243727-3261648	888419	636156	154661	645021	294429	167571	814492	526046	156087	710816	237154	370312	350345	360727	2641952	118498
XLOC_001112|PGSC0003DMT400032888	PGSC0003DMB000000004:3287220-3289131	0	0	0	0	0	0	0	0	0	0	0	0	0	0	0	0
XLOC_001115|PGSC0003DMT400032895,PGSC0003DMT400032896	PGSC0003DMB000000004:3353576-3356679	0	0	0	0	0	0	313828	724596	0	0	0	0	0	0	0	0
XLOC_001116|PGSC0003DMT400032897	PGSC0003DMB000000004:3370303-3373265	1374714	265344	685364	225507	0	0	15167	216077	0	0	0	0	0	0	0	0
XLOC_001117|PGSC0003DMT400032901	PGSC0003DMB000000004:3376948-3387016	0	0	0	0	0	0	0	0	0	0	0	0	0	0	0	0
XLOC_001119|PGSC0003DMT400032908,PGSC0003DMT400032909	PGSC0003DMB000000004:3426370-3431335	559701	438846	164885	157837	43765	823967	462199	590726	510692	309801	110043	634406	56151	246301	59464	200831
XLOC_001121|PGSC0003DMT400032910	PGSC0003DMB000000004:3455093-3457175	0	0	0	0	0	0	0	0	0	0	0	0	0	0	0	0
XLOC_001123|PGSC0003DMT400032913,PGSC0003DMT400032914	PGSC0003DMB000000004:3494622-3501841	260369	306658	0	0	212424	133011	18026	288744	30126	997369	0	0	420234	20157	0	0
XLOC_001125|PGSC0003DMT400032920	PGSC0003DMB000000004:3518483-3522555	400247	193706	0	0	0	0	9102	753907	0	0	0	0	0	0	0	0
XLOC_001128|PGSC0003DMT400032928,PGSC0003DMT400032929	PGSC0003DMB000000004:3540452-3542984	370007	363383	343173	627305	534376	264405	391531	225403	1191757	341491	0	0	580405	372645	191308	45914
XLOC_001131|PGSC0003DMT400052121,PGSC0003DMT400052123,PGSC0003DMT400052125,PGSC0003DMT400052126,PGSC0003DMT400052131	PGSC0003DMB000000004:3559425-3572018	0	0	0	0	188934	416856	884298	153488	119581	194178	0	0	0	0	0	0
XLOC_001132|PGSC0003DMT400052118,PGSC0003DMT400052119,PGSC0003DMT400052120	PGSC0003DMB000000004:3573032-3577023	236187	257704	202809	778544	326902	282541	18,91	175836	167598	214235	0	0	0	0	0	0
XLOC_001133|PGSC0003DMT400052114,PGSC0003DMT400052115,PGSC0003DMT400052116	PGSC0003DMB000000004:3577354-3584680	294838	503285	0	0	140683	78103	188583	356512	550155	2495277	144793	209675	348146	862946	352089	182725
XLOC_001134|PGSC0003DMT400052109	PGSC0003DMB000000004:3585816-3592014	1871839	179328	0	0	1047486	141781	980066	765492	0	0	0	0	0	0	0	0
XLOC_001135|PGSC0003DMT400052107,PGSC0003DMT400052108	PGSC0003DMB000000004:3650943-3660108	371473	306099	230375	795811	344261	351273	228956	13549	39069	245864	477064	205322	0	0	0	0
XLOC_001137|PGSC0003DMT400052104	PGSC0003DMB000000004:3678345-3684178	193291	221714	156384	178961	196787	203667	160677	151906	165083	195744	582604	769029	192781	189693	129297	120824
XLOC_001138|PGSC0003DMT400052100,PGSC0003DMT400052101	PGSC0003DMB000000004:3689341-3694283	379367	54055	245741	559363	363664	630248	349054	450962	654319	209835	304676	200944	411287	286919	380671	197804
XLOC_001139|PGSC0003DMT400052094,PGSC0003DMT400052096,PGSC0003DMT400052097,PGSC0003DMT400052098	PGSC0003DMB000000004:3694950-3701275	0	0	0	0	0	0	0	0	0	0	0	0	0	0	0	0
XLOC_001140|PGSC0003DMT400052089,PGSC0003DMT400052090,PGSC0003DMT400052091,PGSC0003DMT400052092,PGSC0003DMT400052093	PGSC0003DMB000000004:3702689-3706163	0	0	0	0	166511	544727	0	0	0	0	0	0	0	0	0	0
XLOC_001142|PGSC0003DMT400052082,PGSC0003DMT400052083,PGSC0003DMT400052084,PGSC0003DMT400052085	PGSC0003DMB000000004:3720709-3723968	209533	164652	0	0	0	0	301451	192485	0	0	0	0	371302	625258	0	0
XLOC_001144|PGSC0003DMT400052081	PGSC0003DMB000000004:3743037-3750712	0	0	0	0	0	0	0	0	0	0	0	0	0	0	0	0
XLOC_001147|PGSC0003DMT400052072,PGSC0003DMT400052074	PGSC0003DMB000000004:3789948-3793310	0	0	0	0	162345	690325	0	0	0	0	0	0	0	0	0	0
XLOC_001148|-	PGSC0003DMB000000004:3799842-3817801	404085	846603	422416	857735	424641	486549	283817	238343	18126	412786	0	0	197665	59422	346296	334333
XLOC_001150|PGSC0003DMT400052064	PGSC0003DMB000000004:3839689-3847953	138509	188876	158122	911215	152282	137074	114,46	140492	110737	208858	490122	61798	136361	113959	858938	158988
XLOC_001151|PGSC0003DMT400052063	PGSC0003DMB000000004:3848652-3853919	947998	104796	572342	628289	730312	796842	630473	659956	101839	752249	269159	735069	388559	73081	978452	808621
XLOC_001152|PGSC0003DMT400052062	PGSC0003DMB000000004:3870042-3873801	211915	15746	0	0	926218	279798	140406	17711	202476	535387	0	0	452703	158846	0	0
XLOC_001153|PGSC0003DMT400052060	PGSC0003DMB000000004:3877237-3880488	0	0	0	0	0	0	0	0	0	0	0	0	0	0	0	0
XLOC_001154|-	PGSC0003DMB000000004:3905079-3905590	411017	464208	0	0	398209	284435	29,32	691064	0	0	0	0	0	0	244389	521363
XLOC_001155|PGSC0003DMT400052059	PGSC0003DMB000000004:3915493-3916199	0	0	0	329607	0	0	0	0	0	0	0	0	0	0	0	0
XLOC_001158|PGSC0003DMT400052057	PGSC0003DMB000000004:3937020-3938886	0	0	0	103317	0	0	0	0	0	0	54,14	0	0	0	0	0
XLOC_001159|PGSC0003DMT400052055	PGSC0003DMB000000004:3945187-3950351	750783	296263	247519	279504	346964	342784	743593	483287	46963	208016	264051	567651	583412	322372	296654	302907
XLOC_001160|PGSC0003DMT400052052,PGSC0003DMT400052053,PGSC0003DMT400052054	PGSC0003DMB000000004:3987724-3996552	0	0	0	0	0	0	0	0	0	0	0	0	0	0	0	0
XLOC_001161|PGSC0003DMT400052050,PGSC0003DMT400052051	PGSC0003DMB000000004:3999410-4003751	656304	651843	213404	75622	206405	996099	563121	454791	386698	519532	336536	747857	861792	455402	520244	520136
XLOC_001162|PGSC0003DMT400052044,PGSC0003DMT400052045,PGSC0003DMT400052046,PGSC0003DMT400052047	PGSC0003DMB000000004:4005922-4014524	244822	231028	629457	318499	151141	285807	11434	136295	204128	179951	241649	846739	0	0	0	0
XLOC_001164|PGSC0003DMT400052038,PGSC0003DMT400052039,PGSC0003DMT400052040,PGSC0003DMT400052041,PGSC0003DMT400052042	PGSC0003DMB000000004:4059534-4068178	343665	392605	264534	462068	358839	518931	24,74	259038	376336	31523	438738	193119	317598	335172	348788	194073
XLOC_001165|PGSC0003DMT400052036,PGSC0003DMT400052037	PGSC0003DMB000000004:4070415-4073873	175011	859004	454351	427692	153933	127,55	125594	958917	978342	89025	189623	708321	111762	86369	121747	346181
XLOC_001166|PGSC0003DMT400052034,PGSC0003DMT400052035	PGSC0003DMB000000004:4085449-4086780	320577	377234	177678	704053	312581	431559	370764	315611	445796	15517	476614	357463	336519	221509	274803	361624
XLOC_001167|PGSC0003DMT400052032	PGSC0003DMB000000004:4094902-4097839	276644	267412	165358	163283	312623	260252	263495	220239	144904	217231	128988	691627	162,69	262277	133622	148888
XLOC_001169|PGSC0003DMT400052027,PGSC0003DMT400052028,PGSC0003DMT400052029	PGSC0003DMB000000004:4111198-4113987	0	0	0	0	144404	556377	40413	824666	0	0	0	0	0	0	0	0
XLOC_001170|PGSC0003DMT400052024,PGSC0003DMT400052026	PGSC0003DMB000000004:4115094-4129116	476637	371867	194049	238896	364539	34029	34498	364121	356967	173431	221327	244086	229919	422265	241712	134724
XLOC_001171|-	PGSC0003DMB000000004:4129656-4147088	243803	507591	299206	389933	685898	62545	398662	458348	256188	290704	316955	145188	203353	79759	292722	510302
XLOC_001175|PGSC0003DMT400052010,PGSC0003DMT400052011,PGSC0003DMT400052012,PGSC0003DMT400052013,PGSC0003DMT400052014	PGSC0003DMB000000004:4291975-4295982	0	0	0	0	0	0	0	0	0	0	0	0	0	0	0	0
XLOC_001177|-	PGSC0003DMB000000004:4331229-4406807	0	0	233565	173552	184795	259368	869458	419064	0	0	0	0	0	0	137718	257141
XLOC_001181|-	PGSC0003DMB000000004:533261-533955	0	0	0	0	0	0	0	0	0	0	0	0	0	0	0	0
XLOC_001182|-	PGSC0003DMB000000004:983725-984670	0	0	0	0	0	0	0	0	0	0	0	0	0	0	0	0
XLOC_001183|-	PGSC0003DMB000000004:1028702-1044202	0	0	0	0	0	0	0	0	0	0	0	0	0	0	0	0
XLOC_001184|-	PGSC0003DMB000000004:1028702-1044202	0	0	0	481722	0	0	0	0	0	0	333632	0	0	0	0	0
XLOC_001185|-	PGSC0003DMB000000004:1299729-1300113	0	0	0	0	0	0	0	0	0	0	0	0	0	0	0	0
XLOC_001186|-	PGSC0003DMB000000004:1873133-1900868	0	0	0	0	0	0	0	0	0	0	0	0	0	0	0	0
XLOC_001188|-	PGSC0003DMB000000004:3906917-3907318	680044	0	0	0	0	0	0	0	0	0	0	0	0	0	0	0
XLOC_001195|PGSC0003DMT400040392	PGSC0003DMB000000005:417397-419857	0	0	0	0	268841	201631	249957	193534	302247	845794	0	0	0	0	0	0
XLOC_001197|PGSC0003DMT400040397,PGSC0003DMT400040399	PGSC0003DMB000000005:485133-487113	487021	160742	0	0	227822	705636	1657777	2247978	0	0	0	0	0	0	0	0
XLOC_001198|PGSC0003DMT400040401,PGSC0003DMT400040403	PGSC0003DMB000000005:524885-570359	0	0	0	0	0	0	0	0	0	0	207667	708115	0	0	0	0
XLOC_001200|PGSC0003DMT400040406,PGSC0003DMT400040407,PGSC0003DMT400040408,PGSC0003DMT400040409,PGSC0003DMT400040410,PGSC0003DMT400040411	PGSC0003DMB000000005:680088-683505	778186	807511	90433	880711	120064	92796	678724	669839	524954	100971	27279	301275	980367	809625	55369	639967
XLOC_001203|-	PGSC0003DMB000000005:861509-873491	224515	258476	0	0	917086	258479	16239	137446	0	0	0	0	0	0	0	0
XLOC_001215|PGSC0003DMT400021811,PGSC0003DMT400021812	PGSC0003DMB000000005:1795008-1818806	161102	725279	0	0	215318	130502	687174	798778	0	0	0	0	0	0	0	0
XLOC_001216|PGSC0003DMT400021824	PGSC0003DMB000000005:1837030-1839368	964263	776373	374967	148345	116777	514809	433073	619233	537262	627348	623424	217254	407687	849349	421051	215005
XLOC_001223|-	PGSC0003DMB000000005:2002672-2015854	0	0	0	0	426401	1275398	1360134	747049	0	0	0	0	0	0	0	0
XLOC_001227|-	PGSC0003DMB000000005:2388712-2410944	300099	19705	244065	0	243938	312115	203026	234912	0	0	0	0	0	0	349119	167679
XLOC_001234|PGSC0003DMT400016953,PGSC0003DMT400016955	PGSC0003DMB000000005:2936698-2941927	118049	957664	414938	636426	706267	73331	849414	501642	308115	15685	818588	703888	574862	964324	853621	413895
XLOC_001248|PGSC0003DMT400061209	PGSC0003DMB000000005:3796575-3802918	287206	189103	680245	357354	271121	199154	144515	1908698	198487	312421	0	0	588951	215424	435241	391002
XLOC_001259|PGSC0003DMT400061199,PGSC0003DMT400061200	PGSC0003DMB000000005:4295686-4326866	834954	790619	520633	285022	291304	244365	423292	167026	463479	584149	103,34	375787	755138	248191	168021	427625
XLOC_001264|PGSC0003DMT400040425,PGSC0003DMT400040426,PGSC0003DMT400040427	PGSC0003DMB000000005:329782-335624	0	0	0	0	0	0	0	0	0	0	0	0	0	0	0	0
XLOC_001265|PGSC0003DMT400040429,PGSC0003DMT400040431,PGSC0003DMT400040432,PGSC0003DMT400040433,PGSC0003DMT400040434,PGSC0003DMT400040435,PGSC0003DMT400040436	PGSC0003DMB000000005:344440-392589	130991	358965	216398	171828	315142	136581	973508	994943	0	0	0	0	0	0	0	0
XLOC_001267|PGSC0003DMT400040443,PGSC0003DMT400040444	PGSC0003DMB000000005:424099-429693	426152	262524	189849	267905	186329	190319	147029	149833	181158	240061	0	0	0	0	0	0
XLOC_001269|PGSC0003DMT400088094	PGSC0003DMB000000005:524885-570359	0	0	0	0	0	0	0	0	0	0	0	0	0	0	0	0
XLOC_001270|PGSC0003DMT400040447,PGSC0003DMT400040448	PGSC0003DMB000000005:524885-570359	173429	971409	0	0	0	0	720184	638461	18178	280888	0	0	0	0	0	0
XLOC_001272|PGSC0003DMT400040451	PGSC0003DMB000000005:644741-645507	0	0	0	0	0	0	1462036	600559	0	0	0	0	0	0	0	0
XLOC_001274|-	PGSC0003DMB000000005:861509-873491	0	188349	367669	895869	321302	163834	649472	140908	179895	296319	0	0	0	0	0	0
XLOC_001280|PGSC0003DMT400062300	PGSC0003DMB000000005:1181726-1193434	0	0	0	0	0	0	0	0	0	0	0	0	0	0	0	0
XLOC_001283|PGSC0003DMT400062283	PGSC0003DMB000000005:1511917-1517632	0	0	0	0	0	0	0	0	0	0	0	0	0	0	0	0
XLOC_001291|PGSC0003DMT400021830,PGSC0003DMT400021832,PGSC0003DMT400021833,PGSC0003DMT400021834,PGSC0003DMT400021835	PGSC0003DMB000000005:1840122-1845895	0	0	0	0	167467	948163	478344	719142	0	0	0	0	0	0	0	0
XLOC_001292|-	PGSC0003DMB000000005:1885095-1904516	654899	406808	403586	510742	525722	53252	428701	391508	441587	449135	131386	312042	413488	419706	46728	498432
XLOC_001303|PGSC0003DMT400072143	PGSC0003DMB000000005:2575320-2577847	0	0	0	0	0	0	0	0	0	0	0	0	0	0	0	0
XLOC_001305|PGSC0003DMT400048942	PGSC0003DMB000000005:2745218-2761689	164368	185014	193151	492868	165099	21636	146958	142599	168681	214672	0	0	0	0	0	0
XLOC_001306|PGSC0003DMT400016945,PGSC0003DMT400016946,PGSC0003DMT400016950	PGSC0003DMB000000005:2909057-2916209	400491	533426	0	0	0	0	379804	265952	0	0	614372	311275	479313	519861	0	0
XLOC_001307|PGSC0003DMT400016939,PGSC0003DMT400016940	PGSC0003DMB000000005:2917343-2921153	221604	291325	0	0	130439	201412	138025	170885	244411	2117253	0	0	0	0	243925	879001
XLOC_001309|PGSC0003DMT400089865	PGSC0003DMB000000005:2936698-2941927	105825	960431	0	0	52,31	170007	107844	155335	117,62	0	379119	853018	102269	269128	719122	0
XLOC_001317|PGSC0003DMT400003078	PGSC0003DMB000000005:3232152-3232741	304873	543675	0	0	159901	44417	270674	140,89	499361	0	241436	804785	868376	137112	0	0
XLOC_001322|-	PGSC0003DMB000000005:3356079-3404348	189551	316777	956194	559748	110123	178495	844354	729054	0	0	0	0	0	0	0	0
XLOC_001323|PGSC0003DMT400061191,PGSC0003DMT400061192	PGSC0003DMB000000005:3432095-3437727	228411	266984	214045	259771	2178582	343539	31883	213371	196178	203553	0	0	0	0	518991	0
XLOC_001325|PGSC0003DMT400061189,PGSC0003DMT400061190	PGSC0003DMB000000005:3539711-3549200	674215	971258	41582	442648	329866	960364	482108	649052	651228	381948	172527	35368	465402	416408	597237	240781
XLOC_001327|PGSC0003DMT400061185,PGSC0003DMT400061186	PGSC0003DMB000000005:3784320-3793537	127045	167384	0	0	215242	232253	869437	157385	217815	138398	0	0	0	0	0	0
XLOC_001335|PGSC0003DMT400061200	PGSC0003DMB000000005:4295686-4326866	22259	0	0	0	2485932	218147	154365	494331	0	232901	216266	0	996759	0	23346	273478
XLOC_001337|PGSC0003DMT400061182	PGSC0003DMB000000005:4372960-4374265	233324	279989	0	0	0	0	0	0	0	0	0	0	0	0	0	0
XLOC_001338|-	PGSC0003DMB000000005:2578329-2578893	0	0	0	0	0	0	0	0	0	0	0	0	0	0	0	0
XLOC_001339|-	PGSC0003DMB000000005:3803418-3803800	0	0	0	0	530028	0	224972	0	0	0	0	0	0	0	0	0
XLOC_001340|-	PGSC0003DMB000000005:4330350-4330600	272436	288461	242149	199187	188533	117833	242928	127239	883165	278034	0	0	153,58	242495	242983	0
XLOC_001341|-	PGSC0003DMB000000005:4330716-4331010	684537	483202	0	0	236859	118,43	789923	159854	133145	838323	0	0	0	0	0	0
XLOC_001359|PGSC0003DMT400045580	PGSC0003DMB000000006:795115-809209	360539	197075	0	0	388101	309074	2808656	695539	658224	312595	0	0	0	0	0	0
XLOC_001376|PGSC0003DMT400086978	PGSC0003DMB000000006:2686933-2690763	0	0	0	0	0	0	0	0	0	0	0	0	0	0	0	0
XLOC_001382|PGSC0003DMT400028130	PGSC0003DMB000000006:3121879-3152768	0	0	0	0	0	0	0	0	0	0	0	0	0	0	0	0
XLOC_001383|-	PGSC0003DMB000000006:3154331-3157438	674233	132808	720595	203791	122207	904175	963197	769993	135537	119473	0	917427	942779	345167	745799	642544
XLOC_001389|-	PGSC0003DMB000000006:3464914-3487968	767038	128581	535657	22753	517171	718654	0	0	137315	461098	268842	715086	0	0	0	0
XLOC_001409|PGSC0003DMT400045580,PGSC0003DMT400045581,PGSC0003DMT400045582,PGSC0003DMT400045583,PGSC0003DMT400045584,PGSC0003DMT400045585	PGSC0003DMB000000006:795115-809209	0	0	0	0	0	0	0	0	0	0	0	0	0	0	0	0
XLOC_001410|PGSC0003DMT400045578,PGSC0003DMT400045579	PGSC0003DMB000000006:838967-848391	154093	109059	815984	76334	194,6	151565	174246	152261	115123	136905	401045	253921	974169	143885	133315	96175
XLOC_001411|PGSC0003DMT400045575,PGSC0003DMT400045576,PGSC0003DMT400045577	PGSC0003DMB000000006:853520-859651	0	0	856028	312621	0	0	0	0	0	0	0	0	0	0	0	0
XLOC_001414|PGSC0003DMT400038904,PGSC0003DMT400038905	PGSC0003DMB000000006:1089677-1128848	524795	267107	17911	1343545	110473	232838	1402502	711691	732719	251728	0	0	0	0	0	0
XLOC_001418|-	PGSC0003DMB000000006:1735214-1748325	816653	240445	0	0	194737	25652	111761	148162	0	0	0	0	18661	273758	0	0
XLOC_001419|PGSC0003DMT400016437	PGSC0003DMB000000006:1798991-1816112	0	0	0	0	140284	745794	965827	433637	0	0	0	0	0	0	0	0
XLOC_001429|PGSC0003DMT400041012,PGSC0003DMT400041013,PGSC0003DMT400041014	PGSC0003DMB000000006:2666665-2670805	0	0	0	0	17529	60847	953236	2715761	0	0	0	0	0	0	0	0
XLOC_001430|PGSC0003DMT400086978	PGSC0003DMB000000006:2686933-2690763	0	0	0	0	605748	151437	0	0	0	0	0	0	0	0	0	0
XLOC_001448|PGSC0003DMT400090269	PGSC0003DMB000000006:3464914-3487968	640238	402145	500783	547618	343567	486126	434357	446529	581804	520053	26014	22,48	60927	320652	40,78	296598
XLOC_001461|PGSC0003DMT400035565	PGSC0003DMB000000006:4121169-4130867	730529	139955	0	0	686044	212788	15727	987556	0	0	0	0	0	0	0	0
XLOC_001483|-	PGSC0003DMB000000007:1268299-1298555	65872	628023	334566	200151	568335	592016	473848	375572	354975	237472	0	0	385808	46703	406932	271288
XLOC_001484|PGSC0003DMT400067811	PGSC0003DMB000000007:1411610-1417509	467365	237532	221551	29159	41399	307258	266717	541333	19393	549468	0	0	0	0	0	0
XLOC_001496|PGSC0003DMT400013531	PGSC0003DMB000000007:2162163-2178456	0	0	0	0	0	0	0	0	0	0	0	0	0	0	0	0
XLOC_001497|PGSC0003DMT400013528,PGSC0003DMT400013529	PGSC0003DMB000000007:2195143-2206733	0	0	0,852667	209688	0	0	0	0	0	0	0	0	0	0	0	0
XLOC_001504|-	PGSC0003DMB000000007:2510507-2534005	328477	341786	213136	144303	142054	280713	265447	262716	120319	293712	357956	236297	0	0	205363	433976
XLOC_001510|PGSC0003DMT400008534	PGSC0003DMB000000007:3477026-3490742	199522	377306	175811	31971	229457	178227	220864	149246	0	0	0	0	295768	264406	334246	355924
XLOC_001514|PGSC0003DMT400008538,PGSC0003DMT400008539,PGSC0003DMT400008540,PGSC0003DMT400008541	PGSC0003DMB000000007:3633738-3640963	157296	120458	0	0	909425	28234	143272	2062100	19239	168788	0	0	0	0	0	0
XLOC_001516|PGSC0003DMT400008961,PGSC0003DMT400008962,PGSC0003DMT400008963	PGSC0003DMB000000007:4031452-4053624	264934	321385	261077	201387	331714	361764	204543	148493	170523	38998	246335	256958	0	0	0	0
XLOC_001521|PGSC0003DMT400053933	PGSC0003DMB000000007:348334-351505	300535	153649	0	0	2357946	15803	110911	2565008	0	0	0	0	0	0	0	0
XLOC_001526|PGSC0003DMT400066026	PGSC0003DMB000000007:565642-574006	180333	138068	789805	242013	156185	21712	2453244	2564643	19317	798477	311285	801792	0	0	0	0
XLOC_001536|PGSC0003DMT400008876,PGSC0003DMT400008877,PGSC0003DMT400067807	PGSC0003DMB000000007:1095733-1121388	725148	200675	0	0	417942	147632	242945	284065	649261	258864	0	0	778328	361706	0	0
XLOC_001540|PGSC0003DMT400090591	PGSC0003DMB000000007:1331664-1369504	182242	220529	133698	372238	228212	225434	228385	340463	271538	255068	0	0	2012062	426999	278358	24768
XLOC_001541|PGSC0003DMT400090591	PGSC0003DMB000000007:1331664-1369504	171231	0	0	0	0	0	0	0	0	0	0	0	0	0	0	0
XLOC_001551|PGSC0003DMT400013531	PGSC0003DMB000000007:2162163-2178456	138792	653132	548269	270601	310612	154512	582396	216071	239959	0	0	0	0	0	110033	293422
XLOC_001577|PGSC0003DMT400021630,PGSC0003DMT400021666,PGSC0003DMT400021667	PGSC0003DMB000000008:144017-153470	174632	144362	0	0	191284	198445	2705626	796945	0	0	0	0	0	0	0	0
XLOC_001579|PGSC0003DMT400021663,PGSC0003DMT400021664,PGSC0003DMT400021665	PGSC0003DMB000000008:188928-193173	0	0	0,627472	380173	587859	251501	0	0	0	0	0	0	0	0	0	0
XLOC_001580|PGSC0003DMT400021659,PGSC0003DMT400021660,PGSC0003DMT400021661,PGSC0003DMT400021662	PGSC0003DMB000000008:194867-201168	0	0	0,955835	312145	0	0	0	0	0	0	0	0	0	0	0	0
XLOC_001581|PGSC0003DMT400021656,PGSC0003DMT400021657	PGSC0003DMB000000008:205565-209459	318155	366927	150231	104068	166584	338012	153469	951846	347326	199369	362146	858345	0	0	254055	178703
XLOC_001582|PGSC0003DMT400021653,PGSC0003DMT400021654,PGSC0003DMT400021655	PGSC0003DMB000000008:246904-249795	0	0	0	0	148001	245457	0	0	231441	233284	0	0	0	0	0	0
XLOC_001583|PGSC0003DMT400021648,PGSC0003DMT400021649	PGSC0003DMB000000008:289022-300084	0	0	0	0	196308	891013	0	0	0	0	0	0	0	0	0	0
XLOC_001585|PGSC0003DMT400021643,PGSC0003DMT400021644	PGSC0003DMB000000008:339559-343624	268996	205702	0	0	11445	184213	197533	15704	130801	201316	0	0	0	0	0	0
XLOC_001587|PGSC0003DMT400028896,PGSC0003DMT400028898,PGSC0003DMT400028899	PGSC0003DMB000000008:451419-455862	0	0	0	0	0	0	842283	408574	0	0	0	0	0	0	0	0
XLOC_001602|PGSC0003DMT400028840	PGSC0003DMB000000008:608517-610594	0	0	387359	688249	0	0	411464	13443	0	0	0	0	0	0	0	0
XLOC_001604|PGSC0003DMT400028837,PGSC0003DMT400028839	PGSC0003DMB000000008:655938-665292	0	0	251976	252737	208289	959181	101603	101213	325623	226713	0	0	0	0	0	0
XLOC_001608|PGSC0003DMT400028835	PGSC0003DMB000000008:766677-770176	140971	122473	771076	272841	105,06	200115	113758	141808	110147	103,29	906465	339924	130412	793625	130878	974329
XLOC_001609|PGSC0003DMT400028833	PGSC0003DMB000000008:836076-838966	0	0	0	887515	0	0	0	0	0	0	0	0	0	0	0	0
XLOC_001612|PGSC0003DMT400028827,PGSC0003DMT400028828	PGSC0003DMB000000008:880791-883236	0	0	0	0	0	0	0	0	0	0	0	0	0	0	0	0
XLOC_001613|PGSC0003DMT400028823,PGSC0003DMT400028826	PGSC0003DMB000000008:916266-920444	0	0	0	0	0	0	0	0	0	0	0	0	0	0	0	0
XLOC_001614|PGSC0003DMT400028822	PGSC0003DMB000000008:920874-923161	0	0	0	0	0	0	0	0	0	0	0	0	0	0	0	0
XLOC_001615|PGSC0003DMT400028815,PGSC0003DMT400028816,PGSC0003DMT400028817,PGSC0003DMT400028818,PGSC0003DMT400028819,PGSC0003DMT400028820	PGSC0003DMB000000008:926448-935586	515223	610407	129367	213189	173019	465742	1035768	670581	390913	0	0	0	588606	986402	522063	341623
XLOC_001616|PGSC0003DMT400028811,PGSC0003DMT400028812,PGSC0003DMT400028813	PGSC0003DMB000000008:950221-953707	182262	1987986	0	0	144203	121163	295115	2188840	0	0	0	0	0	0	0	0
XLOC_001617|PGSC0003DMT400028806,PGSC0003DMT400028807,PGSC0003DMT400028808	PGSC0003DMB000000008:974932-981040	2511013	169205	0	0	0	0	667911	19664	0	0	0	0	0	0	0	0
XLOC_001620|PGSC0003DMT400028800	PGSC0003DMB000000008:1063880-1065798	844258	184202	0	0	0	0	0	0	0	0	0	0	0	0	0	0
XLOC_001621|PGSC0003DMT400028799	PGSC0003DMB000000008:1070722-1072187	0	0	0	0	0	0	0	0	0	0	0	0	0	0	0	0
XLOC_001626|PGSC0003DMT400028789,PGSC0003DMT400028790	PGSC0003DMB000000008:1189255-1192542	221431	11517	0	0	250892	806508	161382	870876	0	0	0	0	315353	11065	0	0
XLOC_001637|PGSC0003DMT400028762	PGSC0003DMB000000008:1293508-1298882	424033	366906	0	0	151454	177486	143494	2143945	266053	245688	0	0	431814	211037	243995	130864
XLOC_001639|PGSC0003DMT400028759,PGSC0003DMT400028760	PGSC0003DMB000000008:1310892-1315488	151039	130306	0	0	229943	408282	1063893	805206	0	0	0	0	0	0	0	0
XLOC_001641|PGSC0003DMT400028753,PGSC0003DMT400028754,PGSC0003DMT400028755	PGSC0003DMB000000008:1324014-1328168	0	0	0	0	0	0	0	0	0	0	0	0	0	0	0	0
XLOC_001642|PGSC0003DMT400028749,PGSC0003DMT400028750,PGSC0003DMT400028751,PGSC0003DMT400028752	PGSC0003DMB000000008:1328636-1331337	204073	848612	0	0	0	0	0	0	0	0	0	0	0	0	0	0
XLOC_001647|-	PGSC0003DMB000000008:1369589-1382918	0	0	0	0	0	0	391816	630165	0	0	0	0	0	0	0	0
XLOC_001651|PGSC0003DMT400028730	PGSC0003DMB000000008:1463626-1476070	254111	216712	166361	545178	242545	355667	138195	230846	241377	188316	613749	479491	19826	26692	130509	244179
XLOC_001652|PGSC0003DMT400028726,PGSC0003DMT400028728	PGSC0003DMB000000008:1477893-1482352	768248	358904	120743	220005	285966	366989	337141	651962	280088	163733	275579	150081	49559	189502	0	0
XLOC_001653|PGSC0003DMT400028723,PGSC0003DMT400028724,PGSC0003DMT400028725	PGSC0003DMB000000008:1506560-1512581	965413	523699	140316	885845	880903	120332	653189	485587	705103	941657	280478	1178213	0	0	834754	214975
XLOC_001656|PGSC0003DMT400028721	PGSC0003DMB000000008:1614125-1615819	148522	220713	0	0	432763	182572	144326	138732	0	0	0	0	0	0	0	0
XLOC_001663|PGSC0003DMT400028714	PGSC0003DMB000000008:1699793-1702701	249101	239836	216818	201968	181449	680171	16505	146959	203986	428181	920687	17472	5904	310182	0	0
XLOC_001664|PGSC0003DMT400028709,PGSC0003DMT400028710,PGSC0003DMT400028711,PGSC0003DMT400028712,PGSC0003DMT400028713	PGSC0003DMB000000008:1723404-1728333	0	0	0	0	230588	852228	0	0	0	0	0	0	0	0	0	0
XLOC_001665|PGSC0003DMT400028707	PGSC0003DMB000000008:1729735-1732453	101263	845326	354805	360528	609363	815024	594887	68268	513811	445726	220819	264983	675091	595669	282728	390932
XLOC_001666|PGSC0003DMT400028701,PGSC0003DMT400028702,PGSC0003DMT400028703,PGSC0003DMT400028704,PGSC0003DMT400028705,PGSC0003DMT400028706	PGSC0003DMB000000008:1747952-1751836	0	0	0	0	0	0	331995	771754	0	0	0	0	0	0	0	0
XLOC_001667|PGSC0003DMT400027163	PGSC0003DMB000000008:1818255-1823972	0	0	0	0	669108	250915	912873	903147	0	0	0	0	0	0	0	0
XLOC_001669|PGSC0003DMT400027162	PGSC0003DMB000000008:1856562-1862040	379522	502308	0	0	22981	369337	328463	332349	338335	2032393	594841	267679	0	0	36,67	150441
XLOC_001674|PGSC0003DMT400027159	PGSC0003DMB000000008:1894145-1896757	322293	712178	22419	491771	484861	484861	343981	353405	481512	366098	368975	37776	12639	324291	449923	199966
XLOC_001676|PGSC0003DMT400027155,PGSC0003DMT400027156	PGSC0003DMB000000008:1946772-1949819	201334	160745	962646	657164	134523	160952	162838	100516	142,24	109963	325598	654459	131501	114,53	116691	829794
XLOC_001678|PGSC0003DMT400027153	PGSC0003DMB000000008:1966752-1975048	0	0	0	0	0	0	610493	152885	0	0	0	0	0	0	0	0
XLOC_001681|PGSC0003DMT400027151	PGSC0003DMB000000008:2068101-2071081	236315	222414	0	0	239854	299817	177084	2128574	0	0	0	0	0	0	0	0
XLOC_001682|PGSC0003DMT400072705,PGSC0003DMT400072706	PGSC0003DMB000000008:2133448-2137158	0	0	0	0	572061	154934	0	0	169049	555076	0	0	0	0	0	0
XLOC_001683|PGSC0003DMT400072701	PGSC0003DMB000000008:2142265-2144759	153855	159635	0	0	245932	489069	159291	241421	0	0	0	0	0	0	0	0
XLOC_001686|PGSC0003DMT400072692,PGSC0003DMT400072693,PGSC0003DMT400072694,PGSC0003DMT400072695,PGSC0003DMT400072696,PGSC0003DMT400072697,PGSC0003DMT400072698,PGSC0003DMT400072699	PGSC0003DMB000000008:2172889-2177571	133072	171334	0	0	633818	182163	557875	110898	0	0	0	0	0	0	0	0
XLOC_001687|PGSC0003DMT400072688,PGSC0003DMT400072689,PGSC0003DMT400072691	PGSC0003DMB000000008:2185909-2196812	85292	772887	391505	537933	548461	839473	445467	456406	610176	168527	419636	292235	706692	368442	725644	383933
XLOC_001688|PGSC0003DMT400072687	PGSC0003DMB000000008:2219296-2220872	0	0	0	0	0	0	0	0	0	0	0	0	0	0	0	0
XLOC_001689|PGSC0003DMT400072677	PGSC0003DMB000000008:2262721-2265976	377452	231684	15559	511941	227137	383293	371863	306584	38304	26797	288082	246927	0	0	0	0
XLOC_001690|PGSC0003DMT400072673	PGSC0003DMB000000008:2270479-2272472	0	0	0	0	0	0	0	0	0	0	0	0	0	0	0	0
XLOC_001692|PGSC0003DMT400072665	PGSC0003DMB000000008:2286839-2301641	0	0	0	0	0	0	0	0	0	0	0	0	0	0	0	0
XLOC_001695|PGSC0003DMT400072657,PGSC0003DMT400072658	PGSC0003DMB000000008:2378195-2384525	813417	79854	102144	252074	849952	703639	60354	483052	516898	782856	235166	520093	437304	685621	281865	529565
XLOC_001697|PGSC0003DMT400072655	PGSC0003DMB000000008:2391966-2393986	105515	106864	462129	894443	825435	674635	972149	985598	56513	561825	0	0	724128	626125	545554	290962
XLOC_001699|-	PGSC0003DMB000000008:2435977-2438171	120663	240491	311233	417926	36348	178056	78498	152489	248501	498365	87218	533988	640201	328524	151932	405152
XLOC_001702|PGSC0003DMT400072641	PGSC0003DMB000000008:2486928-2487901	293264	261486	0	0	491344	30709	194304	28835	300216	252033	0	0	278436	421318	0	0
XLOC_001703|PGSC0003DMT400072638,PGSC0003DMT400072639,PGSC0003DMT400072640	PGSC0003DMB000000008:2495934-2498672	620688	858771	643833	149586	691096	895261	615312	592916	782944	560165	48073	445779	400835	539145	560626	481959
XLOC_001704|-	PGSC0003DMB000000008:2531551-2532677	0	0	0	0	0	0	0	0	0	0	0	0	0	0	0	0
XLOC_001705|PGSC0003DMT400072637	PGSC0003DMB000000008:2534425-2542203	280493	138876	577073	39,97	1279354	344894	1657016	216521	35822	827794	0	0	34545	239076	27,33	2680790
XLOC_001706|-	PGSC0003DMB000000008:2553740-2568248	0	0	0	0	0	0	0	0	0	0	0	0	0	0	0	0
XLOC_001707|-	PGSC0003DMB000000008:2575695-2585748	0	0	0	0	0	0	0	0	0	0	0	0	0	0	0	0
XLOC_001708|PGSC0003DMT400072631,PGSC0003DMT400072632	PGSC0003DMB000000008:2593039-2597156	157824	152509	100226	111009	179303	152946	157908	982451	104754	125996	424868	380092	130861	161359	960803	826055
XLOC_001714|PGSC0003DMT400072623,PGSC0003DMT400072624,PGSC0003DMT400072625,PGSC0003DMT400072626,PGSC0003DMT400072627	PGSC0003DMB000000008:2708898-2715440	289171	25288	202654	233728	355688	182318	142909	270426	259574	268522	0	0	0	0	0	0
XLOC_001715|PGSC0003DMT400072616,PGSC0003DMT400072617,PGSC0003DMT400072618,PGSC0003DMT400072619,PGSC0003DMT400072620	PGSC0003DMB000000008:2747992-2752698	0	0	0	0	0	0	742805	136195	0	0	0	0	0	0	0	0
XLOC_001719|PGSC0003DMT400072607,PGSC0003DMT400072608	PGSC0003DMB000000008:2835484-2840345	0	0	0	339052	0	0	0	0	0	0	0	0	0	0	0	0
XLOC_001721|PGSC0003DMT400072600	PGSC0003DMB000000008:2864125-2866299	309303	21,94	0	0	188207	782093	195637	180056	0	0	0	0	0	0	0	0
XLOC_001723|PGSC0003DMT400072595,PGSC0003DMT400072597	PGSC0003DMB000000008:2869600-2873144	0	0	0	0	264837	359312	2368904	193997	0	0	0	0	0	0	0	0
XLOC_001724|PGSC0003DMT400072593,PGSC0003DMT400072594	PGSC0003DMB000000008:2879508-2882171	0	0	0	0	153568	190721	0	0	0	0	0	0	0	0	0	0
XLOC_001725|PGSC0003DMT400072589,PGSC0003DMT400072590,PGSC0003DMT400072591,PGSC0003DMT400072592	PGSC0003DMB000000008:2900762-2905725	162603	13754	0	0	8207	226278	330455	135227	18772	967650	0	0	0	0	0	0
XLOC_001726|PGSC0003DMT400072586,PGSC0003DMT400072587	PGSC0003DMB000000008:2906831-2923375	156786	479364	139063	751862	166935	618838	1676070	181786	570927	1964611	356645	151222	0	0	286844	41343
XLOC_001728|PGSC0003DMT400072583	PGSC0003DMB000000008:2930066-2930822	246806	194258	126833	281052	262996	277733	263952	250939	206746	210418	109545	438179	216701	173672	189606	138525
XLOC_001729|PGSC0003DMT400072577	PGSC0003DMB000000008:2947017-2957422	566355	424524	350037	480595	319558	220765	377748	520523	246396	369619	0	0	343637	206881	190105	295758
XLOC_001731|PGSC0003DMT400072574,PGSC0003DMT400072575	PGSC0003DMB000000008:2974867-2979618	155131	128407	189808	143238	203,2	159176	149772	154619	100595	205178	437486	530682	767294	109801	132845	164927
XLOC_001732|PGSC0003DMT400072572,PGSC0003DMT400072573	PGSC0003DMB000000008:2984992-2987451	207256	274841	194876	38058	335457	391043	214795	196044	273268	317887	0	0	273265	197757	0	0
XLOC_001737|PGSC0003DMT400072569	PGSC0003DMB000000008:3020792-3025360	190703	194443	0	0	337262	192459	2566530	148444	0	0	0	0	0	0	0	0
XLOC_001740|PGSC0003DMT400072566	PGSC0003DMB000000008:3069989-3070892	0	0	0	0	0	0	0	0	0	0	0	0	0	0	0	0
XLOC_001741|PGSC0003DMT400072564,PGSC0003DMT400072565	PGSC0003DMB000000008:3096091-3104061	349434	339629	0	0	248663	39098	216024	27238	25523	161196	110887	255955	466604	252369	0	0
XLOC_001742|PGSC0003DMT400072562,PGSC0003DMT400072563	PGSC0003DMB000000008:3120937-3128051	432032	343826	249164	680319	401563	212429	263711	238395	183371	418898	0	0	0	0	972272	411974
XLOC_001746|PGSC0003DMT400072555	PGSC0003DMB000000008:3210612-3213600	238953	314855	0	0	198434	151582	167115	892807	0	0	0	0	0	0	0	0
XLOC_001748|PGSC0003DMT400072552,PGSC0003DMT400072553	PGSC0003DMB000000008:3225512-3228970	25204	344701	336031	138206	141715	279342	198301	242783	285966	462993	0	0	0	0	215426	224797
XLOC_001752|PGSC0003DMT400072540,PGSC0003DMT400072541,PGSC0003DMT400072542,PGSC0003DMT400072543	PGSC0003DMB000000008:3289951-3296149	212004	140485	0	0	289676	233829	239828	173311	176787	218116	0	0	0	0	737628	256936
XLOC_001754|PGSC0003DMT400072539	PGSC0003DMB000000008:3321312-3351160	224967	25113	227276	255366	415195	214949	24079	223256	231175	410606	0	0	378532	312974	155241	225203
XLOC_001755|PGSC0003DMT400072530,PGSC0003DMT400072531,PGSC0003DMT400072532,PGSC0003DMT400072533,PGSC0003DMT400072534,PGSC0003DMT400072535,PGSC0003DMT400072536,PGSC0003DMT400072537	PGSC0003DMB000000008:3388323-3409100	148669	194397	258061	412503	265663	250718	173,57	160859	133116	273451	171885	698219	101956	238526	775253	195787
XLOC_001758|PGSC0003DMT400072522	PGSC0003DMB000000008:3433296-3439884	965056	967248	427421	489419	911852	946676	760287	754023	841811	420715	344544	850395	137747	579273	629455	462923
XLOC_001759|PGSC0003DMT400072521	PGSC0003DMB000000008:3470809-3474469	557765	566952	264405	130497	463187	443887	187239	41,68	405021	473596	0	335697	301852	397173	0	0
XLOC_001760|PGSC0003DMT400072519,PGSC0003DMT400072520	PGSC0003DMB000000008:3477949-3486913	146585	10347	0	0	184438	749281	131408	995794	0	0	0	0	0	0	0	0
XLOC_001761|PGSC0003DMT400072518	PGSC0003DMB000000008:3493373-3502691	0	0	0	0	132046	140299	80068	1277195	0	0	0	0	0	0	0	0
XLOC_001762|PGSC0003DMT400072515,PGSC0003DMT400072516	PGSC0003DMB000000008:3516486-3521997	638107	911567	136335	274989	851719	107,41	22402	383398	103271	223885	604088	57616	929128	323864	734716	222695
XLOC_001765|PGSC0003DMT400072508	PGSC0003DMB000000008:3562844-3565219	0	0	0	0	0	0	0	0	0	0	0	0	0	0	0	0
XLOC_001767|PGSC0003DMT400072504,PGSC0003DMT400072505	PGSC0003DMB000000008:3569974-3573975	136581	191997	190509	0	134893	303509	245387	254982	315163	175428	0	0	0	0	0	0
XLOC_001768|PGSC0003DMT400072501	PGSC0003DMB000000008:3602260-3605623	499488	782081	231438	730165	399696	614521	419198	393805	779626	407764	301284	450557	457975	528433	436334	291343
XLOC_001769|PGSC0003DMT400072500	PGSC0003DMB000000008:3623355-3626440	301694	223242	172606	730194	204461	217,78	210413	176859	161878	183462	521776	913107	178285	187668	123715	204541
XLOC_001771|PGSC0003DMT400072495,PGSC0003DMT400072496,PGSC0003DMT400072497,PGSC0003DMT400072498	PGSC0003DMB000000008:3661610-3665758	14136	162717	0	0	707732	156775	14628	158541	0	0	0	0	0	0	0	0
XLOC_001772|PGSC0003DMT400072494	PGSC0003DMB000000008:3714361-3716120	0	0	0	0	0	0	0	0	0	0	0	0	0	0	0	0
XLOC_001773|PGSC0003DMT400072493	PGSC0003DMB000000008:3729438-3737975	0	0	0	0	0	0	0	0	0	0	0	0	0	0	0	0
XLOC_001774|-	PGSC0003DMB000000008:3756314-3764918	871068	53538	0	0	646722	519822	711138	458793	213205	879963	274428	13636	172212	515212	454909	465922
XLOC_001776|-	PGSC0003DMB000000008:3808528-3814964	32322	192664	0	0	397648	21125	165769	1989751	0	0	0	0	0	0	0	0
XLOC_001777|PGSC0003DMT400072484,PGSC0003DMT400072485	PGSC0003DMB000000008:3817418-3823580	137992	500755	0	0	0	0	0	0	0	0	0	0	0	0	0	0
XLOC_001779|PGSC0003DMT400072481	PGSC0003DMB000000008:3856197-3857197	178698	1548599	0	0	0	0	0	0	1445936	243159	0	0	0	0	0	0
XLOC_001780|PGSC0003DMT400072479,PGSC0003DMT400072480	PGSC0003DMB000000008:3868742-3878672	56382	587658	100,75	141745	463338	628804	405742	335331	656851	766124	281761	447374	605887	512312	170242	426164
XLOC_001783|PGSC0003DMT400072465,PGSC0003DMT400072466	PGSC0003DMB000000008:3967142-3970124	480323	506386	1029,41	747856	581636	308769	688816	411509	233168	751,32	809302	164359	339826	468684	146559	685568
XLOC_001784|PGSC0003DMT400072461,PGSC0003DMT400072462,PGSC0003DMT400072463,PGSC0003DMT400072464	PGSC0003DMB000000008:3984280-3989300	203533	371873	765619	200309	521446	632866	771306	251371	700998	622680	338195	7676	276045	943699	300843	777086
XLOC_001794|-	PGSC0003DMB000000008:167086-188064	0	0	0	0	150431	238664	133620	1915272	0	0	0	0	0	0	0	0
XLOC_001795|PGSC0003DMT400021622	PGSC0003DMB000000008:201744-203765	140281	165035	2691626	273505	808986	151685	147161	174712	257694	381758	586304	219868	0	0	0	0
XLOC_001797|-	PGSC0003DMB000000008:224687-227834	0	0	0	0	0	0	157016	735838	0	0	0	0	0	0	0	0
XLOC_001800|PGSC0003DMT400021616	PGSC0003DMB000000008:289022-300084	246851	228036	0	0	0	0	14744	141475	0	0	0	0	471353	101487	0	0
XLOC_001801|-	PGSC0003DMB000000008:300806-315728	275922	498229	274145	34466	227961	28441	296693	227628	271368	287819	220631	150886	243439	300836	247855	421154
XLOC_001802|PGSC0003DMT400021609,PGSC0003DMT400021610,PGSC0003DMT400021612,PGSC0003DMT400021614	PGSC0003DMB000000008:317242-335835	0	0	0	0	0	0	0	0	0	0	0	0	0	0	0	0
XLOC_001805|PGSC0003DMT400028689,PGSC0003DMT400028690	PGSC0003DMB000000008:366526-371823	0	0	0	0	0	0	615171	782466	0	0	0	0	0	0	0	0
XLOC_001810|PGSC0003DMT400028682	PGSC0003DMB000000008:457151-460015	557993	553711	383352	260153	506467	500171	594693	639694	605577	587615	233218	248428	510585	496669	319759	480,84
XLOC_001812|-	PGSC0003DMB000000008:611461-626466	288454	300401	227394	293794	365775	268,75	226,72	229395	235816	209391	114257	625874	238439	288846	219	106736
XLOC_001813|PGSC0003DMT400028676,PGSC0003DMT400028677	PGSC0003DMB000000008:629665-632195	0	0	0	0	0	0	827352	1220551	0	0	0	0	0	0	0	0
XLOC_001814|PGSC0003DMT400090623	PGSC0003DMB000000008:633682-639975	398211	311855	299271	345003	297627	456362	187922	219226	458421	10291	25,47	309169	0	0	241604	180676
XLOC_001817|PGSC0003DMT400028669	PGSC0003DMB000000008:717844-723229	0	0	0	0	0	0	0	0	0	0	0	0	0	0	0	0
XLOC_001819|PGSC0003DMT400028659	PGSC0003DMB000000008:740582-745124	0	0	0	0	0	0	997781	507677	0	0	0	0	0	0	0	0
XLOC_001820|PGSC0003DMT400028658	PGSC0003DMB000000008:754984-756134	0	0	0	0	344771	366319	0	0	209956	203377	0	0	0	0	0	0
XLOC_001821|PGSC0003DMT400028908	PGSC0003DMB000000008:770791-771265	0	0	0	0	0	0	0	0	0	0	0	0	0	0	0	0
XLOC_001822|PGSC0003DMT400028657	PGSC0003DMB000000008:772383-779268	221451	256809	168714	370082	218929	273661	278775	273343	307666	232459	0	0	0	0	0	0
XLOC_001828|PGSC0003DMT400028645,PGSC0003DMT400028646	PGSC0003DMB000000008:812254-816510	0	0	0	0	0	0	0	0	0	0	0	0	0	0	0	0
XLOC_001829|PGSC0003DMT400028643,PGSC0003DMT400028644	PGSC0003DMB000000008:818786-823636	0	0	0	0	0	0	0	0	0	0	0	0	0	0	0	0
XLOC_001830|PGSC0003DMT400028642	PGSC0003DMB000000008:825537-828351	411716	343904	353747	642176	337154	617323	470781	355734	306975	319333	309744	111852	402,3	370,54	428407	369926
XLOC_001831|PGSC0003DMT400028640,PGSC0003DMT400028641	PGSC0003DMB000000008:843496-849272	184325	130112	455095	194663	2066878	225885	448793	717397	0	0	0	0	0	0	0	0
XLOC_001832|PGSC0003DMT400028638,PGSC0003DMT400028639	PGSC0003DMB000000008:886254-892254	284534	385818	0	0	165808	337836	175952	159546	308173	162261	0	0	0	0	24916	177765
XLOC_001835|PGSC0003DMT400028627,PGSC0003DMT400028628	PGSC0003DMB000000008:995147-998878	15656	150567	0	0	0	0	299469	131134	0	0	0	0	0	0	0	0
XLOC_001836|PGSC0003DMT400028624,PGSC0003DMT400028625,PGSC0003DMT400028626	PGSC0003DMB000000008:1008393-1018129	0	0	0	0	0	0	915672	111163	0	0	0	0	0	0	0	0
XLOC_001839|PGSC0003DMT400092392	PGSC0003DMB000000008:1055532-1056132	239698	140632	18446	3228,88	133564	584341	574753	206451	407693	101662	1170,98	429359	154428	849725	433122	197435
XLOC_001840|PGSC0003DMT400028623	PGSC0003DMB000000008:1058923-1059969	0	0	0	490294	0	0	0	0	0	0	102169	352307	0	0	0	0
XLOC_001841|PGSC0003DMT400028622	PGSC0003DMB000000008:1072947-1078388	0	0	0,715339	184765	250627	18797	0	0	328731	197123	499519	529793	0	0	366079	0
XLOC_001843|PGSC0003DMT400028620	PGSC0003DMB000000008:1106728-1109079	0	0	0	0	0	0	0	0	0	0	0	0	0	0	0	0
XLOC_001844|PGSC0003DMT400028618,PGSC0003DMT400028619	PGSC0003DMB000000008:1123364-1124490	0	0	0	168932	0	0	0	0	0	0	554565	0	0	0	0	0
XLOC_001845|PGSC0003DMT400028615,PGSC0003DMT400028616,PGSC0003DMT400028617	PGSC0003DMB000000008:1179638-1187102	0	0	0	0	0	0	553403	958137	0	0	0	0	0	0	0	0
XLOC_001850|PGSC0003DMT400028593,PGSC0003DMT400028594	PGSC0003DMB000000008:1331654-1338884	463009	679153	221522	486123	432025	424023	28016	324246	415442	23981	268235	25637	281032	389832	326707	266141
XLOC_001855|PGSC0003DMT400028573,PGSC0003DMT400028574	PGSC0003DMB000000008:1428161-1434636	207196	175883	0	0	293796	171879	494145	968339	0	0	211593	324999	0	0	0	0
XLOC_001857|PGSC0003DMT400028571,PGSC0003DMT400028572	PGSC0003DMB000000008:1437512-1441917	0	0	0	0	0	0	0	0	0	0	0	0	0	0	0	0
XLOC_001859|PGSC0003DMT400028569	PGSC0003DMB000000008:1446326-1453981	0	0	0	0	0	0	0	0	0	0	0	0	0	0	0	0
XLOC_001860|PGSC0003DMT400028567	PGSC0003DMB000000008:1455486-1460023	141342	218567	0	0	761533	145101	143952	139491	0	0	215692	215692	310314	612461	338023	2630386
XLOC_001861|PGSC0003DMT400028566	PGSC0003DMB000000008:1477080-1477751	51638	538115	0	0	292344	275246	331058	30146	25257	1502883	0	0	292808	154108	30884	162443
XLOC_001862|PGSC0003DMT400028561	PGSC0003DMB000000008:1482642-1486115	11207	201366	668978	198681	13654	220328	166733	170933	201431	133088	0	0	0	0	0	0
XLOC_001874|PGSC0003DMT400028532,PGSC0003DMT400028533	PGSC0003DMB000000008:1654223-1656837	521517	14022	0	0	0	0	291786	647882	0	0	0	0	0	0	0	0
XLOC_001875|PGSC0003DMT400028529,PGSC0003DMT400028530	PGSC0003DMB000000008:1703251-1706717	0	0	0	0	148539	1974169	0	0	0	0	0	0	0	0	0	0
XLOC_001880|PGSC0003DMT400027147	PGSC0003DMB000000008:1779263-1781354	155614	142906	111,01	97206	112917	147681	143277	874964	901174	145552	492539	132607	817626	111168	754594	766571
XLOC_001881|PGSC0003DMT400027139,PGSC0003DMT400027141,PGSC0003DMT400027142,PGSC0003DMT400027143	PGSC0003DMB000000008:1792065-1796428	135791	185382	0	0	149129	226009	149548	210537	0	0	189411	312736	0	0	254344	7593
XLOC_001882|PGSC0003DMT400027132,PGSC0003DMT400027134,PGSC0003DMT400027135,PGSC0003DMT400027137,PGSC0003DMT400027138	PGSC0003DMB000000008:1799229-1808161	166299	22548	0	0	911312	144975	0	0	0	0	0	0	0	0	0	0
XLOC_001886|PGSC0003DMT400027123	PGSC0003DMB000000008:1900110-1901116	265965	16688	1140348	662593	449913	332322	186007	22083	306557	965086	407596	926354	0	385791	0	0
XLOC_001887|PGSC0003DMT400027120,PGSC0003DMT400027121,PGSC0003DMT400027122	PGSC0003DMB000000008:1901296-1906887	275419	270899	159405	572009	312587	277031	163966	344048	340524	170698	258576	11313	0	0	220889	286667
XLOC_001892|PGSC0003DMT400027097,PGSC0003DMT400027098,PGSC0003DMT400027099,PGSC0003DMT400027101,PGSC0003DMT400027103,PGSC0003DMT400027104	PGSC0003DMB000000008:2002667-2016666	458501	502799	503893	167165	140575	145626	915999	534395	119456	2507816	919768	760196	102511	18222	154154	927248
XLOC_001893|PGSC0003DMT400027096	PGSC0003DMB000000008:2049410-2054600	360777	359145	21378	396793	460925	40411	314423	254907	251902	31721	0	0	208596	395234	0	0
XLOC_001902|PGSC0003DMT400072448,PGSC0003DMT400072449	PGSC0003DMB000000008:2126995-2129120	0	0	0	0	0	0	0	0	0	0	0	0	0	0	0	0
XLOC_001906|PGSC0003DMT400072715	PGSC0003DMB000000008:2235769-2236369	0	0	0	0	0	0	0	0	0	0	0	0	0	0	0	0
XLOC_001907|PGSC0003DMT400072432	PGSC0003DMB000000008:2255875-2257707	0	0	0	333782	0	0	0	0	0	0	0	0	0	0	0	0
XLOC_001909|PGSC0003DMT400072425	PGSC0003DMB000000008:2307706-2319537	243344	175945	0	0	964426	220713	519778	867962	0	0	0	0	0	0	0	0
XLOC_001910|PGSC0003DMT400072713	PGSC0003DMB000000008:2323707-2324277	406826	957238	0	0	0	0	0	0	0	0	0	0	0	0	0	0
XLOC_001912|PGSC0003DMT400072415,PGSC0003DMT400072416,PGSC0003DMT400072419	PGSC0003DMB000000008:2341038-2347705	341126	624281	284486	17243	507109	404376	312793	389448	147445	337471	633663	221786	284892	299886	345563	320523
XLOC_001913|PGSC0003DMT400072412,PGSC0003DMT400072413,PGSC0003DMT400072414	PGSC0003DMB000000008:2394528-2397273	420655	48919	227141	560415	910856	504422	2314117	402374	421985	312711	335426	838164	0	0	58109	0
XLOC_001914|PGSC0003DMT400072411	PGSC0003DMB000000008:2409226-2415846	105985	155,51	162297	607147	568628	258561	199881	678533	208462	340288	182167	283703	778725	254393	152943	358756
XLOC_001915|PGSC0003DMT400072409,PGSC0003DMT400072410	PGSC0003DMB000000008:2419946-2429131	0	0	146358	299354	421612	32011	508906	131221	447183	263561	0	0	0	0	0	0
XLOC_001917|PGSC0003DMT400072406,PGSC0003DMT400072407	PGSC0003DMB000000008:2568785-2572407	384818	334814	134919	203438	336919	166704	233836	208435	210434	215306	309243	101741	0	0	0	0
XLOC_001918|PGSC0003DMT400072405	PGSC0003DMB000000008:2586621-2588291	0	0	0	0	0	0	0	0	0	0	0	0	0	0	0	0
XLOC_001919|PGSC0003DMT400072404	PGSC0003DMB000000008:2600215-2603281	824935	194102	0	0	126862	214079	0	0	0	0	0	0	0	0	0	0
XLOC_001921|PGSC0003DMT400072397	PGSC0003DMB000000008:2654021-2655986	345167	221498	278905	611791	195435	542875	144839	175863	813776	23057	0	0	0	0	559731	447785
XLOC_001923|-	PGSC0003DMB000000008:2697363-2707253	0	0	0	0	0	0	0	0	0	0	0	0	0	0	0	0
XLOC_001924|PGSC0003DMT400072393	PGSC0003DMB000000008:2719759-2720707	0	0	0	0	0	0	469232	2730129	0	0	0	0	0	0	0	0
XLOC_001925|PGSC0003DMT400072383,PGSC0003DMT400072384,PGSC0003DMT400072385,PGSC0003DMT400072386,PGSC0003DMT400072387,PGSC0003DMT400072389,PGSC0003DMT400072390,PGSC0003DMT400072392	PGSC0003DMB000000008:2725979-2729476	0	0	0	0	0	0	0	0	0	0	0	0	0	0	0	0
XLOC_001926|PGSC0003DMT400072375,PGSC0003DMT400072376,PGSC0003DMT400072378,PGSC0003DMT400072379	PGSC0003DMB000000008:2731691-2736323	0	0	0	0	0	0	0	0	0	0	0	0	0	0	0	0
XLOC_001928|PGSC0003DMT400072365	PGSC0003DMB000000008:2780033-2781465	0	0	0	0	0	0	0	0	0	0	0	0	0	0	0	0
XLOC_001929|PGSC0003DMT400072364	PGSC0003DMB000000008:2841105-2844306	94493	959557	294696	64643	803057	111854	869541	727794	752369	43311	332582	207864	747628	708279	768848	367996
XLOC_001930|PGSC0003DMT400072360,PGSC0003DMT400072361,PGSC0003DMT400072362,PGSC0003DMT400072363	PGSC0003DMB000000008:2846298-2849625	970025	178794	12148	224435	2767384	16889	1602229	967735	134029	206797	219857	1100051	0	0	0	0
XLOC_001932|PGSC0003DMT400072359	PGSC0003DMB000000008:2874465-2875857	0	0	0	0	0	0	0	0	0	0	0	0	0	0	0	0
XLOC_001933|PGSC0003DMT400072354,PGSC0003DMT400072355,PGSC0003DMT400072356	PGSC0003DMB000000008:2883157-2888150	0	0	0	0	0	0	0	0	0	0	0	0	0	0	0	0
XLOC_001934|PGSC0003DMT400072352,PGSC0003DMT400072353	PGSC0003DMB000000008:2906831-2923375	613249	154004	485381	111886	401846	183053	0	0	323709	893855	359593	256279	0	0	291763	460359
XLOC_001935|-	PGSC0003DMB000000008:2932364-2945126	0	0	0	0	980427	149787	148623	161744	0	0	0	0	0	0	0	0
XLOC_001939|PGSC0003DMT400072344	PGSC0003DMB000000008:3060942-3061772	459195	486207	272098	205171	503145	546177	248888	589775	595437	249936	575774	959623	0	0	0	0
XLOC_001940|PGSC0003DMT400072343	PGSC0003DMB000000008:3066573-3067379	199348	197002	0	194334	0	0	0	0	0	0	599897	0	0	0	0	0
XLOC_001941|PGSC0003DMT400072342	PGSC0003DMB000000008:3074359-3075338	131673	121045	381043	179108	995974	913859	117572	131574	754429	900021	383956	556736	897637	854027	400563	339872
XLOC_001944|PGSC0003DMT400072332	PGSC0003DMB000000008:3092856-3094065	0	0	0	0	0	0	0	0	0	0	0	0	0	0	0	0
XLOC_001945|PGSC0003DMT400072330,PGSC0003DMT400072331	PGSC0003DMB000000008:3107717-3111280	0	0	0	0	2432121	31791	0	0	0	0	0	0	0	0	0	0
XLOC_001947|PGSC0003DMT400072325	PGSC0003DMB000000008:3145090-3155531	0	0	0	0	0	0	0	0	0	0	0	0	0	0	0	0
XLOC_001948|PGSC0003DMT400072322,PGSC0003DMT400072323,PGSC0003DMT400072324	PGSC0003DMB000000008:3157098-3160049	466893	391998	0	0	395212	299844	433332	423394	259178	186497	0	0	34851	16946	367592	859303
XLOC_001950|PGSC0003DMT400072320	PGSC0003DMB000000008:3171686-3178209	228969	247191	0	0	167774	24467	197811	226457	0	0	0	0	485935	143862	0	0
XLOC_001952|PGSC0003DMT400072315	PGSC0003DMB000000008:3181590-3184183	0	0	0	0	0	0	0	0	0	0	0	0	0	0	0	0
XLOC_001953|PGSC0003DMT400072314	PGSC0003DMB000000008:3192250-3193253	0	0	0	0	0	0	0	0	0	0	0	0	0	0	0	0
XLOC_001956|PGSC0003DMT400072306	PGSC0003DMB000000008:3233060-3236966	962005	164915	0	0	0	0	493535	291009	0	0	0	0	0	0	0	0
XLOC_001957|PGSC0003DMT400072300,PGSC0003DMT400072303,PGSC0003DMT400072304,PGSC0003DMT400072305	PGSC0003DMB000000008:3247969-3254473	357137	270907	219048	939972	288198	255329	134891	157643	135449	355738	0	0	0	0	0	0
XLOC_001959|PGSC0003DMT400072295,PGSC0003DMT400072296,PGSC0003DMT400072297	PGSC0003DMB000000008:3283287-3289281	511939	722165	338682	233012	712185	609751	357925	379343	216838	723667	239982	23,96	256234	439999	463824	386097
XLOC_001961|PGSC0003DMT400072290,PGSC0003DMT400072291	PGSC0003DMB000000008:3302893-3305890	462094	16778	335515	216413	639564	182733	166203	986593	255189	107792	0	0	0	0	0	0
XLOC_001963|PGSC0003DMT400072286	PGSC0003DMB000000008:3354312-3362212	0	0	0	0	0	0	831877	120768	0	0	0	0	0	0	0	0
XLOC_001964|PGSC0003DMT400072285	PGSC0003DMB000000008:3374431-3378069	259256	142337	0	0	2815596	299021	157139	174898	242794	705555	0	0	0	0	0	0
XLOC_001965|PGSC0003DMT400072284	PGSC0003DMB000000008:3378606-3387282	180037	216492	214922	257422	215956	244308	200012	237,18	214303	233674	855214	915952	215355	174221	165151	208538
XLOC_001966|PGSC0003DMT400072279	PGSC0003DMB000000008:3442628-3447496	913122	880823	123696	131915	219,02	823713	121396	737871	43867	121528	254701	637561	697449	157608	333703	61,26
XLOC_001970|PGSC0003DMT400072265,PGSC0003DMT400072266,PGSC0003DMT400072267,PGSC0003DMT400072268	PGSC0003DMB000000008:3531124-3541628	0	0	0	0	525166	177609	0	0	0	0	0	284329	0	0	0	0
XLOC_001971|PGSC0003DMT400072262	PGSC0003DMB000000008:3565769-3568963	777119	255992	0	0	394378	560196	510881	604912	604612	21149	0	0	700936	399657	308048	246438
XLOC_001972|PGSC0003DMT400072260,PGSC0003DMT400072261	PGSC0003DMB000000008:3574419-3580391	233863	302648	1601895	191105	161842	224781	280477	133498	261131	169728	0	0	0	0	239524	403137
XLOC_001974|PGSC0003DMT400072257,PGSC0003DMT400072258	PGSC0003DMB000000008:3609511-3611997	0	0	0	0	8355	135769	263901	319528	250485	591422	0	0	0	0	0	0
XLOC_001978|PGSC0003DMT400072250	PGSC0003DMB000000008:3666160-3672662	45126	482259	252245	704456	164434	850295	43557	528739	468618	347278	307077	132589	377844	918437	387613	327001
XLOC_001979|-	PGSC0003DMB000000008:3683559-3699839	0	0	0	0	0	0	0	0	0	0	0	0	0	0	0	0
XLOC_001980|PGSC0003DMT400072243,PGSC0003DMT400072244,PGSC0003DMT400072245	PGSC0003DMB000000008:3706734-3712143	368127	284603	167112	700647	387779	45558	26461	34499	306867	242313	33379	368533	237178	381488	323118	16883
XLOC_001981|PGSC0003DMT400072241,PGSC0003DMT400072242	PGSC0003DMB000000008:3718349-3721258	193365	244466	0	0	356837	142175	0	0	0	0	291122	323274	0	0	0	0
XLOC_001982|PGSC0003DMT400072239,PGSC0003DMT400072240	PGSC0003DMB000000008:3723633-3727116	0	0	0	0	0	0	0	0	0	0	0	0	0	0	830803	249481
XLOC_001983|PGSC0003DMT400072238	PGSC0003DMB000000008:3738430-3743278	227,4	226,72	150734	217923	302287	174482	160114	184809	196579	182511	902111	676583	168026	234809	146,67	285191
XLOC_001984|PGSC0003DMT400072235	PGSC0003DMB000000008:3745934-3749503	94756	119322	49,64	145902	110457	113151	967851	893812	108114	780795	430728	498326	144,46	855043	627321	234364
XLOC_001985|-	PGSC0003DMB000000008:3756314-3764918	832,84	763583	131261	103458	271653	690684	885647	924856	512715	162793	133,83	219982	1007,88	334465	801,83	123733
XLOC_001986|PGSC0003DMT400072228,PGSC0003DMT400072230,PGSC0003DMT400072233	PGSC0003DMB000000008:3766549-3771641	477779	379988	0	0	388857	415859	201344	446102	534685	39757	0	0	158587	366381	409549	408294
XLOC_001987|PGSC0003DMT400072227	PGSC0003DMB000000008:3777454-3785425	27637	20656	0	0	180005	1304922	150079	205004	295127	929102	0	0	0	0	0	0
XLOC_001988|PGSC0003DMT400072226	PGSC0003DMB000000008:3795418-3799564	578284	42,39	316306	325234	461756	471376	405987	457063	562394	490292	0	0	401225	356352	436418	387927
XLOC_001989|PGSC0003DMT400072225	PGSC0003DMB000000008:3823833-3826467	614723	180801	0	0	531757	620383	311689	550278	398554	292765	321161	16058	1319927	668757	487349	16245
XLOC_001990|PGSC0003DMT400072223	PGSC0003DMB000000008:3827294-3831556	174747	176802	0	0	20558	256975	843261	1184087	177498	137914	270236	193548	0	0	0	0
XLOC_001991|PGSC0003DMT400072222	PGSC0003DMB000000008:3832489-3838691	406327	542631	637717	171289	516781	26599	433169	482123	284801	663482	0	0	198105	547394	261189	557204
XLOC_001992|PGSC0003DMT400072220,PGSC0003DMT400072221	PGSC0003DMB000000008:3862597-3866509	448675	540011	470527	223,21	459696	307985	373,66	419221	324829	487985	119078	155971	353778	326175	216755	430097
XLOC_001993|PGSC0003DMT400072219	PGSC0003DMB000000008:3889517-3890455	162014	343088	0	0	672709	224236	163162	257269	294116	132274	0	0	365328	1548508	0	0
XLOC_001995|PGSC0003DMT400072217,PGSC0003DMT400072218	PGSC0003DMB000000008:3934539-3937215	0	0	0	0	0	0	0	0	0	0	0	0	0	0	0	0
XLOC_001996|PGSC0003DMT400072214,PGSC0003DMT400072215,PGSC0003DMT400072216	PGSC0003DMB000000008:3948451-3956647	936122	183672	410902	251551	103674	69996	544317	304114	500566	400122	0	0	263181	466495	125521	104,91
XLOC_001999|PGSC0003DMT400072208,PGSC0003DMT400072210	PGSC0003DMB000000008:3996000-3997855	133699	448771	0	0	142889	2666942	433211	148463	395022	561922	0	0	0	0	245542	0
XLOC_002000|PGSC0003DMT400072204,PGSC0003DMT400072205,PGSC0003DMT400072206,PGSC0003DMT400072207	PGSC0003DMB000000008:4028015-4034601	110586	250871	0	0	0	0	799609	173364	0	0	0	0	0	0	0	0
XLOC_002003|-	PGSC0003DMB000000008:1499706-1500348	0	0	0	0	0	0	0	0	0	0	0	0	0	0	0	0
XLOC_002004|-	PGSC0003DMB000000008:2494188-2494576	66295	727945	872964	861699	152926	127439	618192	688056	143274	721676	129307	831256	996598	874209	700776	233592
XLOC_002005|-	PGSC0003DMB000000008:2533424-2534247	0	0	0	0	0	0	0	0	0	0	0	0	0	0	0	0
XLOC_002006|-	PGSC0003DMB000000008:4007078-4007392	0	574406	964372	264425	0	0	102438	380051	879313	177165	68022	136044	0	0	0	0
XLOC_002010|PGSC0003DMT400048321	PGSC0003DMB000000009:184586-187011	0	0	0	0	283493	9.07854	0	0	0	0	0	0	0	366367	0	0
XLOC_002011|PGSC0003DMT400048327	PGSC0003DMB000000009:229351-289300	146113	164929	765322	775694	0	0	0	0	365615	239407	944144	405665	0	0	0	0
XLOC_002016|PGSC0003DMT400048331	PGSC0003DMB000000009:578715-580695	0	0	0	0	0	0	0	0	0	0	0	0	0	0	0	0
XLOC_002019|PGSC0003DMT400031456,PGSC0003DMT400031457,PGSC0003DMT400031458	PGSC0003DMB000000009:695046-700186	180473	226359	0	0	194371	186699	240728	134579	0	0	0	0	0	0	0	0
XLOC_002026|PGSC0003DMT400080079,PGSC0003DMT400080080,PGSC0003DMT400080081	PGSC0003DMB000000009:1008169-1012082	0	0	0	0	126680	210414	907491	883511	0	0	0	0	0	0	0	0
XLOC_002035|PGSC0003DMT400065618,PGSC0003DMT400065619	PGSC0003DMB000000009:1487921-1493546	911476	129988	684875	238715	101429	101684	702834	805218	100338	687756	809469	343885	574271	871848	62901	426086
XLOC_002037|PGSC0003DMT400065617	PGSC0003DMB000000009:1603330-1606576	183,59	183299	194053	62883	210604	137351	166568	150632	114741	201204	269602	106804	123076	211014	71791	146868
XLOC_002045|PGSC0003DMT400065886	PGSC0003DMB000000009:1996981-1999967	100865	120838	890677	776482	124824	873284	891593	860745	775138	140474	346446	361223	914245	109539	58232	780836
XLOC_002059|-	PGSC0003DMB000000009:3016419-3062544	108375	740265	768503	185874	814713	115549	751111	922476	583713	121082	374419	465346	864514	682903	495539	884112
XLOC_002079|-	PGSC0003DMB000000009:184586-187011	0	0	29831	0,208579	0	0	839095	940207	0	246608	0	0	0	0	0	0
XLOC_002082|PGSC0003DMT400048344,PGSC0003DMT400048345	PGSC0003DMB000000009:302190-304417	0	0	0	0	0	0	0	0	0	0	0	0	0	0	0	0
XLOC_002083|PGSC0003DMT400048346,PGSC0003DMT400048347	PGSC0003DMB000000009:315275-336578	699557	317792	241317	723671	645324	63578	541726	345264	645467	431874	2386101	235457	367325	60229	486775	328483
XLOC_002087|PGSC0003DMT400048352,PGSC0003DMT400048353	PGSC0003DMB000000009:624293-639602	155993	987802	0	0	915426	1997453	309398	314406	0	0	0	0	0	0	0	649277
XLOC_002094|PGSC0003DMT400080100,PGSC0003DMT400080101	PGSC0003DMB000000009:1112117-1117968	0	0	0	0	0	0	288305	787969	0	0	0	0	0	0	0	0
XLOC_002095|PGSC0003DMT400080102	PGSC0003DMB000000009:1169842-1171960	0	0	0	23514	0	0	0	0	0	0	0	0	0	0	0	0
XLOC_002098|-	PGSC0003DMB000000009:1397635-1398115	0	0	0	0	0	0	0	0	0	0	0	0	0	0	0	0
XLOC_002099|PGSC0003DMT400065612,PGSC0003DMT400065613,PGSC0003DMT400065614	PGSC0003DMB000000009:1494129-1503504	0	0	0	0	0	0	0	1970029	0	0	0	0	0	0	202069	354973
XLOC_002100|PGSC0003DMT400065609	PGSC0003DMB000000009:1553798-1555807	131099	231351	0	0	0	0	130653	229608	0	0	0	0	0	0	0	0
XLOC_002105|PGSC0003DMT400068737	PGSC0003DMB000000009:1872867-1880489	0	0	0	0	101876	212241	494115	148969	0	0	0	0	0	0	0	0
XLOC_002107|PGSC0003DMT400065885	PGSC0003DMB000000009:1933100-1942027	46207	834988	350466	324322	920924	687495	589436	932282	431398	724323	231751	533028	333418	745803	461571	586122
XLOC_002111|PGSC0003DMT400041539,PGSC0003DMT400041540,PGSC0003DMT400041541	PGSC0003DMB000000009:2149529-2152261	199364	487982	102082	385,87	778227	536052	648998	337931	572581	116657	335964	946854	218774	883083	388098	136701
XLOC_002121|-	PGSC0003DMB000000009:2379997-2407527	0	0	0	0	0	0	0	0	0	0	0	0	0	0	0	0
XLOC_002125|PGSC0003DMT400085435	PGSC0003DMB000000009:2553790-2618740	371882	192011	0	0	269328	363247	348347	168234	201747	352489	0	0	164038	388728	242504	420143
XLOC_002131|-	PGSC0003DMB000000009:3200342-3221580	589967	546977	720046	121893	719049	769321	676175	723805	707918	100648	441639	242902	516246	60612	397913	753941
XLOC_002137|PGSC0003DMT400051035	PGSC0003DMB000000009:3578641-3604241	335222	398866	469076	15488	657996	318181	351612	276867	308311	523166	0	0	212533	31253	0	0
XLOC_002146|PGSC0003DMT400083202	PGSC0003DMB000000010:346604-355546	0	0	0	0	0	0	0	0	0	0	0	0	0	0	0	0
XLOC_002147|PGSC0003DMT400083199,PGSC0003DMT400083200,PGSC0003DMT400083201	PGSC0003DMB000000010:377998-387991	424044	302362	21307	339647	148154	351966	203536	208998	281102	41819	0	0	0	0	278458	161613
XLOC_002148|PGSC0003DMT400011144	PGSC0003DMB000000010:394617-400814	0	0	0	0	0	0	664927	715086	0	0	0	0	0	0	0	0
XLOC_002151|PGSC0003DMT400011139	PGSC0003DMB000000010:443473-445320	0	0	0	0	0	0	0	0	0	0	0	0	0	0	0	0
XLOC_002152|PGSC0003DMT400011136,PGSC0003DMT400011137,PGSC0003DMT400011138	PGSC0003DMB000000010:485821-493784	356162	154133	315704	766302	199462	248234	321019	163169	238289	220912	0	0	0	0	0	0
XLOC_002159|PGSC0003DMT400033268	PGSC0003DMB000000010:607399-609798	206151	163917	912656	247165	149221	217273	136717	153828	147484	104468	133,7	519946	133579	170137	121167	116471
XLOC_002160|PGSC0003DMT400033264	PGSC0003DMB000000010:669608-678125	539988	533635	319972	736968	660179	513819	604238	445548	39678	470258	180554	349823	568226	523366	503016	171239
XLOC_002161|PGSC0003DMT400033261,PGSC0003DMT400033262,PGSC0003DMT400033263	PGSC0003DMB000000010:705197-713678	0	0	0	0	0	0	0	0	0	0	0	0	0	0	0	0
XLOC_002163|PGSC0003DMT400033254,PGSC0003DMT400033255,PGSC0003DMT400033256	PGSC0003DMB000000010:725230-732790	456873	171999	0	0	0	0	0	0	0	0	0	0	0	0	0	0
XLOC_002167|PGSC0003DMT400033251	PGSC0003DMB000000010:803381-819245	388581	410272	491195	2139197	486012	379864	272204	259369	230535	52	163898	27269	442362	529827	120911	429177
XLOC_002171|PGSC0003DMT400033247	PGSC0003DMB000000010:897104-898073	217264	175272	0	0	2547538	281911	837412	1485747	241479	253403	0	0	0	0	0	0
XLOC_002173|PGSC0003DMT400071408,PGSC0003DMT400071409	PGSC0003DMB000000010:964081-968102	0	0	0	0	0	0	220836	740875	0	0	0	0	0	0	0	0
XLOC_002176|PGSC0003DMT400071403	PGSC0003DMB000000010:985294-986001	0	0	0	0	0	0	0	0	0	0	0	0	0	0	0	0
XLOC_002180|PGSC0003DMT400071396,PGSC0003DMT400071397	PGSC0003DMB000000010:1137361-1139494	0	0	0	413529	0	0	0	0	0	0	0	0	0	0	0	0
XLOC_002181|PGSC0003DMT400071392,PGSC0003DMT400071393,PGSC0003DMT400071394	PGSC0003DMB000000010:1149316-1154318	235599	21,23	138315	444468	186449	31248	554964	415191	162011	216022	0	0	0	0	0	0
XLOC_002182|PGSC0003DMT400071388,PGSC0003DMT400071389,PGSC0003DMT400071390,PGSC0003DMT400071391	PGSC0003DMB000000010:1154527-1172032	0	0	382513	22311	208096	210738	486428	10438	0	0	0	0	0	0	0	0
XLOC_002183|PGSC0003DMT400043945,PGSC0003DMT400043946,PGSC0003DMT400043947,PGSC0003DMT400043948	PGSC0003DMB000000010:1192522-1195486	0	0	1959529	309312	398928	161829	180719	2058051	0	0	0	0	0	0	0	0
XLOC_002184|PGSC0003DMT400043941,PGSC0003DMT400043942,PGSC0003DMT400043943,PGSC0003DMT400043944	PGSC0003DMB000000010:1196296-1203758	237428	20157	0	0	479331	253567	158788	2364916	253307	242267	0	0	426366	111191	0	0
XLOC_002186|PGSC0003DMT400043940	PGSC0003DMB000000010:1226511-1228892	0	0	0	0	0	0	0	0	0	0	0	0	0	0	0	0
XLOC_002187|PGSC0003DMT400000001,PGSC0003DMT400000002,PGSC0003DMT400000003,PGSC0003DMT400000700	PGSC0003DMB000000010:1241981-1245448	0	0	0	0	182101	343465	963508	231921	0	0	0	0	0	0	0	0
XLOC_002191|PGSC0003DMT400000010	PGSC0003DMB000000010:1275476-1280896	234098	259672	0	0	370291	224199	192956	187429	0	0	0	0	0	0	0	0
XLOC_002192|PGSC0003DMT400000011,PGSC0003DMT400000012,PGSC0003DMT400000013	PGSC0003DMB000000010:1290481-1295616	224612	139999	0	0	228752	229517	750064	703329	204934	546372	0	0	0	0	0	0
XLOC_002193|PGSC0003DMT400095626	PGSC0003DMB000000010:1297637-1310691	0	0	0	0	0	0	0	0	0	0	0	0	0	0	0	0
XLOC_002195|-	PGSC0003DMB000000010:1312189-1313569	0	0	0	207539	0	0	0	0	0	0	0	0	0	0	0	0
XLOC_002196|PGSC0003DMT400000014,PGSC0003DMT400000015,PGSC0003DMT400000016,PGSC0003DMT400000018,PGSC0003DMT400000020,PGSC0003DMT400000021	PGSC0003DMB000000010:1326746-1333088	0	0	0	0	142645	484889	0	0	0	0	0	0	0	0	0	0
XLOC_002197|PGSC0003DMT400000024,PGSC0003DMT400000025	PGSC0003DMB000000010:1336113-1348929	256508	375,89	280302	149621	350612	148236	201549	248244	399446	404839	134211	792498	358644	383507	108636	122737
XLOC_002198|PGSC0003DMT400000026,PGSC0003DMT400000027,PGSC0003DMT400000028,PGSC0003DMT400000029	PGSC0003DMB000000010:1364404-1368248	270481	110328	138907	380876	31945	405565	213128	267636	177409	1617934	0	0	0	0	0	0
XLOC_002200|PGSC0003DMT400000033,PGSC0003DMT400000034	PGSC0003DMB000000010:1419508-1427101	0	0	0	0	726814	150031	564167	865761	0	0	0	0	0	0	0	0
XLOC_002203|-	PGSC0003DMB000000010:1552021-1561978	0	0	0	0	0	0	0	0	0	0	0	0	0	0	0	0
XLOC_002204|-	PGSC0003DMB000000010:1566229-1566755	0	0	0	0	0	0	0	0	0	0	0	0	0	0	0	0
XLOC_002205|PGSC0003DMT400000041	PGSC0003DMB000000010:1573446-1579894	0	0	0	0	2132622	1346529	0	0	0	0	0	0	0	0	0	0
XLOC_002211|PGSC0003DMT400000060,PGSC0003DMT400000061	PGSC0003DMB000000010:1688819-1699907	156073	14113	0	0	14891	2747994	499327	929388	0	0	0	0	0	0	0	0
XLOC_002214|PGSC0003DMT400000062,PGSC0003DMT400000063	PGSC0003DMB000000010:1763648-1767940	0	0	0	0	0	0	589827	954036	0	0	0	0	0	0	0	0
XLOC_002216|PGSC0003DMT400000066	PGSC0003DMB000000010:1783515-1793269	365188	319346	180347	2521179	376782	313049	193549	272909	262664	429209	723662	227437	292821	244304	1628222	309776
XLOC_002218|PGSC0003DMT400000076,PGSC0003DMT400000077,PGSC0003DMT400000078,PGSC0003DMT400000079	PGSC0003DMB000000010:1817873-1821517	380325	888336	440994	314729	205964	214544	704575	858960	329555	202387	0	0	0	0	0	0
XLOC_002219|PGSC0003DMT400088659	PGSC0003DMB000000010:1823513-1823870	0	0	0	0	0	0	0	0	0	0	0	0	0	0	0	0
XLOC_002223|PGSC0003DMT400000089,PGSC0003DMT400000090,PGSC0003DMT400000091,PGSC0003DMT400000092	PGSC0003DMB000000010:1892185-1897594	394606	55577	510267	804804	501908	497935	26584	402754	451942	552386	38,57	216333	330878	351207	171905	360252
XLOC_002224|-	PGSC0003DMB000000010:1898193-1908948	266678	221463	743629	265068	224353	189976	168952	1944492	0	0	236034	137686	0	0	0	0
XLOC_002227|PGSC0003DMT400000106,PGSC0003DMT400000107,PGSC0003DMT400000108	PGSC0003DMB000000010:1947543-1954470	289726	420112	367618	452601	615564	356948	183178	156244	217152	295928	0	0	423679	459342	0	0
XLOC_002229|PGSC0003DMT400000112,PGSC0003DMT400000113,PGSC0003DMT400000114,PGSC0003DMT400000115,PGSC0003DMT400000116,PGSC0003DMT400000117	PGSC0003DMB000000010:1957945-1962157	2052603	160282	0	0	131647	1913446	0	0	0	0	0	0	0	0	0	0
XLOC_002234|-	PGSC0003DMB000000010:2012819-2023132	500439	664324	832076	326787	103378	83995	830573	474429	455211	908315	286582	505738	202111	762346	479647	101851
XLOC_002236|PGSC0003DMT400000126	PGSC0003DMB000000010:2031183-2035473	0	0	0	0	0	0	531369	110891	0	0	0	0	0	0	0	0
XLOC_002237|PGSC0003DMT400000129	PGSC0003DMB000000010:2058213-2069924	17713	278513	0	0	0	0	0	0	230233	644272	0	0	0	0	0	0
XLOC_002238|PGSC0003DMT400000130,PGSC0003DMT400000131,PGSC0003DMT400000132,PGSC0003DMT400000133,PGSC0003DMT400000134	PGSC0003DMB000000010:2075403-2080701	0	0	0	0	1839210	135368	0	0	0	0	0	0	0	0	512473	240364
XLOC_002241|PGSC0003DMT400000139,PGSC0003DMT400000141,PGSC0003DMT400000143	PGSC0003DMB000000010:2171329-2180392	609909	785943	396928	174578	491679	369606	178118	299112	33668	364599	224547	139976	403816	662489	40163	567902
XLOC_002242|PGSC0003DMT400000146,PGSC0003DMT400000147,PGSC0003DMT400000148,PGSC0003DMT400000149	PGSC0003DMB000000010:2209879-2219591	169967	130548	181445	327451	170852	142565	134027	12513	0	0	0	0	0	0	0	0
XLOC_002243|-	PGSC0003DMB000000010:2225028-2236525	136979	153781	0	0	188577	228626	1929851	1431721	531547	208712	0	0	0	0	390416	242916
XLOC_002246|PGSC0003DMT400000154	PGSC0003DMB000000010:2258185-2264697	604046	634111	611846	473095	278678	580578	2161841	511182	488703	927321	271886	14889	302683	189943	374511	147349
XLOC_002247|PGSC0003DMT400000155,PGSC0003DMT400000156,PGSC0003DMT400000157	PGSC0003DMB000000010:2295256-2297948	198253	399865	2821226	413505	176275	41582	149525	146677	201781	924375	0	0	576049	813244	274024	133938
XLOC_002251|PGSC0003DMT400000167,PGSC0003DMT400000170	PGSC0003DMB000000010:2328765-2340479	253437	18,86	30084	1935726	17614	167103	310027	138889	217717	226455	306788	167756	0	0	531139	431899
XLOC_002253|PGSC0003DMT400000173,PGSC0003DMT400000176,PGSC0003DMT400000177	PGSC0003DMB000000010:2396097-2399792	590823	220857	0	0	0	0	577831	726556	0	0	0	0	0	0	0	0
XLOC_002254|-	PGSC0003DMB000000010:2406567-2408005	0	0	0	0	0	0	0	0	0	0	0	0	0	0	0	0
XLOC_002255|-	PGSC0003DMB000000010:2410968-2427694	0	0	0	0	0	0	0	0	0	0	0	0	0	0	0	0
XLOC_002256|-	PGSC0003DMB000000010:2428411-2431742	0	0	0	0	0	0	857872	520812	0	0	0	0	0	0	0	0
XLOC_002257|-	PGSC0003DMB000000010:2486875-2500810	59584	594211	199525	863669	563129	448184	529557	327431	346481	354415	334206	369436	348022	656625	442138	196656
XLOC_002258|PGSC0003DMT400000186,PGSC0003DMT400000187,PGSC0003DMT400000188	PGSC0003DMB000000010:2504116-2507894	717391	694408	485793	184424	370179	591943	452494	394656	392498	53022	0	0	502163	276911	337529	399952
XLOC_002259|PGSC0003DMT400000189,PGSC0003DMT400000190	PGSC0003DMB000000010:2515059-2518311	165751	313475	100174	414225	176047	215,24	121502	173776	219,46	106,16	139598	66972	232106	142835	182442	796619
XLOC_002260|PGSC0003DMT400000191,PGSC0003DMT400000192	PGSC0003DMB000000010:2520399-2529627	0	0	2777671	541659	890592	26619	0	0	508734	212025	287131	809643	0	0	349637	25792
XLOC_002265|-	PGSC0003DMB000000010:2557760-2566732	0	0	0	0	29733	1456193	197737	712036	0	0	0	0	0	0	0	0
XLOC_002266|-	PGSC0003DMB000000010:2566804-2571274	371546	272296	28241	0,9895	353529	324656	240602	222719	17464	356307	0	0	251334	308656	0	0
XLOC_002267|PGSC0003DMT400000210	PGSC0003DMB000000010:2572571-2573704	0	0	0	0	0	0	0	0	0	0	0	0	0	0	0	0
XLOC_002268|PGSC0003DMT400000211,PGSC0003DMT400000212,PGSC0003DMT400000213,PGSC0003DMT400000214	PGSC0003DMB000000010:2618330-2621299	132387	289078	665665	155139	832055	480184	432132	134954	281383	917152	446041	454622	0	0	233865	2512079
XLOC_002269|PGSC0003DMT400000215,PGSC0003DMT400000216	PGSC0003DMB000000010:2684610-2686383	0	0	0	0	0	0	0	0	0	0	0	0	0	0	0	0
XLOC_002270|PGSC0003DMT400000217,PGSC0003DMT400000218,PGSC0003DMT400000219	PGSC0003DMB000000010:2697690-2710098	464456	638892	367297	279525	309805	527347	548001	243396	217749	384501	419239	210784	452232	449381	301591	68066
XLOC_002271|PGSC0003DMT400000220,PGSC0003DMT400000221	PGSC0003DMB000000010:2713063-2714052	360243	369439	18859	689453	195777	136126	507014	490525	142151	805443	266044	345858	827131	111217	332221	168213
XLOC_002272|PGSC0003DMT400000222,PGSC0003DMT400000224	PGSC0003DMB000000010:2717294-2718949	111	133958	190956	625689	173454	634964	123206	102011	510732	204637	448969	493866	121115	191228	681303	300241
XLOC_002277|PGSC0003DMT400000230,PGSC0003DMT400000231,PGSC0003DMT400000232	PGSC0003DMB000000010:2738098-2741391	122192	839555	559796	186831	807826	82139	111127	90323	962407	631336	203913	458802	746456	483266	70445	50819
XLOC_002280|PGSC0003DMT400000235,PGSC0003DMT400000236	PGSC0003DMB000000010:2786523-2789799	299746	379382	563540	221677	143904	473864	327354	339786	358957	257453	302845	649677	372899	642068	328299	229435
XLOC_002281|PGSC0003DMT400000237,PGSC0003DMT400000238,PGSC0003DMT400000239	PGSC0003DMB000000010:2791844-2796661	24,66	12973	163618	175184	16616	182427	163171	858241	0	0	0	0	0	0	0	0
XLOC_002283|PGSC0003DMT400000243,PGSC0003DMT400000244	PGSC0003DMB000000010:2807843-2818399	0	0	0	0	0	0	807666	673078	0	0	0	0	0	0	0	0
XLOC_002284|PGSC0003DMT400000245,PGSC0003DMT400000246,PGSC0003DMT400000247	PGSC0003DMB000000010:2819332-2824619	1213,47	713356	757409	623388	1212,8	999047	1021,74	756848	688516	941812	620716	1399,84	801425	1102,91	210181	351522
XLOC_002286|PGSC0003DMT400000250,PGSC0003DMT400000251	PGSC0003DMB000000010:2843492-2847004	205634	1104403	207119	80501	228587	71433	131539	146073	854218	242446	0	0	0	0	0	0
XLOC_002289|PGSC0003DMT400000254	PGSC0003DMB000000010:2963257-2963608	0	0	0	0	0	0	514939	764178	0	0	0	0	0	0	0	0
XLOC_002290|PGSC0003DMT400000259,PGSC0003DMT400000260	PGSC0003DMB000000010:2969939-2973394	0	0	0	0	147023	1627188	0	0	172392	206012	0	0	0	0	0	0
XLOC_002291|PGSC0003DMT400000261,PGSC0003DMT400000262,PGSC0003DMT400000263	PGSC0003DMB000000010:2979994-2984916	628453	535131	424806	340701	441704	45622	498733	472119	417583	450564	184723	334372	520582	504333	450734	291632
XLOC_002292|PGSC0003DMT400000264	PGSC0003DMB000000010:2985893-2987664	1408,25	1092,54	1183,23	1538,59	1354,71	1391,67	1496,53	1087,36	1170,27	1455,87	787216	472876	992954	1257,36	953995	1043,86
XLOC_002294|PGSC0003DMT400000266,PGSC0003DMT400000268	PGSC0003DMB000000010:3020471-3027037	338382	418705	0	0	186763	22601	263276	230473	100554	311545	0	0	381512	175696	0	0
XLOC_002295|PGSC0003DMT400000269	PGSC0003DMB000000010:3033557-3045701	628527	611087	0	0	196962	39495	836012	891722	330617	13555	446093	386612	561562	204076	401925	225642
XLOC_002296|PGSC0003DMT400000271,PGSC0003DMT400000272,PGSC0003DMT400000273	PGSC0003DMB000000010:3055114-3059789	415621	743854	306975	118102	276354	614138	23,19	237935	31615	2519019	471305	203743	461951	439474	868296	343525
XLOC_002301|PGSC0003DMT400000283,PGSC0003DMT400000284,PGSC0003DMT400000285	PGSC0003DMB000000010:3145302-3149017	0	0	0	0	0	0	0	0	0	0	0	0	0	0	0	0
XLOC_002305|PGSC0003DMT400000293	PGSC0003DMB000000010:3227483-3230210	0	0	0	0	0	0	249786	898202	0	0	0	0	0	0	0	0
XLOC_002307|PGSC0003DMT400000296,PGSC0003DMT400000297	PGSC0003DMB000000010:3257890-3269365	0	0	0	0	0	0	0	0	0	0	0	0	0	0	0	0
XLOC_002309|-	PGSC0003DMB000000010:3296782-3305635	0	0	0	0	961118	130616	0	0	0	0	0	0	0	0	0	0
XLOC_002311|PGSC0003DMT400000310	PGSC0003DMB000000010:3352634-3356937	107844	126875	117156	177914	106205	120199	105301	749056	115637	142231	814803	953493	106001	943508	624792	898823
XLOC_002316|PGSC0003DMT400000323,PGSC0003DMT400000324,PGSC0003DMT400000325,PGSC0003DMT400000326,PGSC0003DMT400000327	PGSC0003DMB000000010:3445931-3448235	0	0	0	0	0	0	1045173	154576	0	0	0	0	0	0	0	0
XLOC_002320|PGSC0003DMT400000336,PGSC0003DMT400000337	PGSC0003DMB000000010:3491511-3495201	0	0	0	0	170524	551263	873545	873056	0	0	0	0	0	0	0	0
XLOC_002321|PGSC0003DMT400000338	PGSC0003DMB000000010:3495681-3496818	0	0	0	0	0	0	0	0	0	0	0	0	0	0	0	0
XLOC_002324|PGSC0003DMT400000341,PGSC0003DMT400000342	PGSC0003DMB000000010:3568905-3574883	121093	153555	0	0	149821	161082	110876	578033	0	0	0	0	0	0	0	0
XLOC_002325|PGSC0003DMT400000344,PGSC0003DMT400000345,PGSC0003DMT400000346	PGSC0003DMB000000010:3593206-3598196	1830902	165053	250823	0	0	0	985641	751226	934449	400347	0	0	0	0	0	0
XLOC_002326|PGSC0003DMT400000347,PGSC0003DMT400000348	PGSC0003DMB000000010:3611036-3618731	0	0	0	0	0	0	0	0	0	0	0	0	0	0	0	0
XLOC_002332|PGSC0003DMT400000682	PGSC0003DMB000000010:3779248-3781146	0	0	0	0	0	0	0	0	0	0	0	0	0	0	0	0
XLOC_002333|PGSC0003DMT400000358,PGSC0003DMT400000359	PGSC0003DMB000000010:3793148-3796759	172725	190622	0	0	283969	177479	143489	14906	0	0	0	0	0	0	0	0
XLOC_002336|PGSC0003DMT400000362,PGSC0003DMT400000363	PGSC0003DMB000000010:3813821-3819819	960764	904239	421708	242819	110816	80031	866028	731253	622901	929673	267707	178494	882617	88685	584592	500487
XLOC_002337|PGSC0003DMT400000364	PGSC0003DMB000000010:3853391-3855651	197778	162401	141111	904994	159213	207745	212559	143268	170099	168064	556709	784453	172928	198795	148797	198396
XLOC_002338|PGSC0003DMT400000365	PGSC0003DMB000000010:3910631-3911622	331503	808371	178576	293786	27112	391039	164397	436327	0	0	0	0	611601	160948	0	0
XLOC_002340|PGSC0003DMT400083215	PGSC0003DMB000000010:4256-5870	297713	992378	2376086	127377	406790	679599	555228	818818	418214	148539	248864	622159	820501	392584	619566	5245
XLOC_002343|PGSC0003DMT400083194,PGSC0003DMT400083196	PGSC0003DMB000000010:172812-175684	0	0	0	0	281246	130623	826477	737387	212916	753017	0	0	0	0	0	0
XLOC_002344|-	PGSC0003DMB000000010:193423-209773	107108	668515	121,59	395675	81144	585173	690729	516038	877181	681169	395833	311012	355925	789458	415636	786579
XLOC_002346|-	PGSC0003DMB000000010:217708-232610	0	0	0	0	0	164081	159188	885891	0	0	0	0	0	0	0	0
XLOC_002348|-	PGSC0003DMB000000010:258937-274063	0	0	0	0	0	0	0	0	0	0	0	0	0	0	0	0
XLOC_002350|PGSC0003DMT400011118,PGSC0003DMT400011122,PGSC0003DMT400011123	PGSC0003DMB000000010:404603-416565	0	0	0	0	0	0	0	0	0	0	0	0	0	0	0	0
XLOC_002351|PGSC0003DMT400011115	PGSC0003DMB000000010:497044-506513	199085	195891	100095	376392	158647	276588	2540537	14088	0	0	0	0	0	0	0	0
XLOC_002352|PGSC0003DMT400011112	PGSC0003DMB000000010:528238-545925	0	0	844569	217393	578263	143722	765173	110784	169659	510414	0	0	0	0	0	0
XLOC_002354|PGSC0003DMT400033244	PGSC0003DMB000000010:610518-612246	0	0	0	0	0	0	0	0	0	0	0	0	0	0	0	0
XLOC_002355|PGSC0003DMT400033237,PGSC0003DMT400033238,PGSC0003DMT400033239,PGSC0003DMT400033240,PGSC0003DMT400033242	PGSC0003DMB000000010:614453-621477	202178	161677	0	0	207632	276176	217447	191339	197862	196655	0	0	0	0	0	0
XLOC_002358|PGSC0003DMT400033231,PGSC0003DMT400033232,PGSC0003DMT400033233,PGSC0003DMT400033234,PGSC0003DMT400033235	PGSC0003DMB000000010:696338-704131	867027	147122	0	0	0	0	828979	216108	0	0	0	0	0	0	0	0
XLOC_002363|PGSC0003DMT400033222	PGSC0003DMB000000010:756681-759225	0	0	0	0	0	0	0	0	0	0	0	0	0	0	0	0
XLOC_002367|-	PGSC0003DMB000000010:846938-849164	0	0	0	0	0	0	0	0	0	0	0	0	0	0	0	0
XLOC_002368|PGSC0003DMT400033215,PGSC0003DMT400033216	PGSC0003DMB000000010:863318-864731	0	0	0	0	0	0	0	0	0	0	0	0	0	0	0	0
XLOC_002369|PGSC0003DMT400033208,PGSC0003DMT400033209,PGSC0003DMT400033210,PGSC0003DMT400033211,PGSC0003DMT400033212,PGSC0003DMT400033213	PGSC0003DMB000000010:867963-877158	0	0	0	0	0	0	0	0	0	0	0	0	0	0	0	0
XLOC_002371|PGSC0003DMT400033203	PGSC0003DMB000000010:886815-893895	0	0	0	0	0	0	0	0	0	0	0	0	0	0	0	0
XLOC_002373|PGSC0003DMT400033191	PGSC0003DMB000000010:958809-961591	0	0	0	0	745807	163146	173272	100668	0	0	0	0	0	0	0	0
XLOC_002374|PGSC0003DMT400071380,PGSC0003DMT400071381,PGSC0003DMT400071382,PGSC0003DMT400071383,PGSC0003DMT400071384,PGSC0003DMT400071385	PGSC0003DMB000000010:971974-979594	162443	227425	0	0	382432	135858	0	0	0	0	0	0	0	0	0	0
XLOC_002375|PGSC0003DMT400071379	PGSC0003DMB000000010:987275-992850	22147	166754	787397	287866	919579	146877	309777	158601	0	0	0	0	0	0	0	0
XLOC_002376|PGSC0003DMT400071378	PGSC0003DMB000000010:1011201-1015490	268861	736437	404776	497625	567281	93471	151139	301636	84056	344769	173596	32721	878369	479055	65726	329419
XLOC_002378|PGSC0003DMT400071375	PGSC0003DMB000000010:1052079-1059847	0	0	0	0	0	0	949378	503177	0	0	0	0	0	0	0	0
XLOC_002379|PGSC0003DMT400071373,PGSC0003DMT400071374	PGSC0003DMB000000010:1060746-1067088	143057	221232	169936	279261	247732	220394	174193	173604	325238	389028	0	0	0	0	0	0
XLOC_002382|PGSC0003DMT400071369,PGSC0003DMT400071370,PGSC0003DMT400071371	PGSC0003DMB000000010:1118504-1122968	0	0	0	0	0	0	0	0	0	0	0	0	0	0	0	0
XLOC_002383|PGSC0003DMT400071364,PGSC0003DMT400071365,PGSC0003DMT400071366,PGSC0003DMT400071368	PGSC0003DMB000000010:1154527-1172032	188874	220086	715972	933015	153633	232591	104496	172,4	210104	107365	296822	542499	151102	144324	176177	106798
XLOC_002384|PGSC0003DMT400043932,PGSC0003DMT400043933,PGSC0003DMT400043934,PGSC0003DMT400043935,PGSC0003DMT400043936,PGSC0003DMT400043937,PGSC0003DMT400043938	PGSC0003DMB000000010:1179493-1184250	185094	316738	0	0	187697	277442	136975	120793	21368	291312	0	0	0	0	0	0
XLOC_002386|PGSC0003DMT400043929	PGSC0003DMB000000010:1205390-1210858	0	0	0	0	172215	138387	857775	13283	0	0	0	0	0	0	0	0
XLOC_002388|PGSC0003DMT400043927,PGSC0003DMT400043928	PGSC0003DMB000000010:1214871-1220866	418623	416192	246835	106652	277445	516549	23238	270056	420505	293912	232016	13553	0	0	324675	935178
XLOC_002389|PGSC0003DMT400000370,PGSC0003DMT400000371,PGSC0003DMT400000372,PGSC0003DMT400000373,PGSC0003DMT400000374,PGSC0003DMT400000375,PGSC0003DMT400000376	PGSC0003DMB000000010:1247024-1255620	205937	175125	0	0	230069	266961	1085411	160478	59871	181044	0	0	0	0	0	0
XLOC_002390|PGSC0003DMT400000377	PGSC0003DMB000000010:1281631-1284181	146,96	337867	222056	186415	146982	184,52	182,07	164775	217664	231276	77415	817616	331663	142555	131416	248,76
XLOC_002391|PGSC0003DMT400000378	PGSC0003DMB000000010:1297637-1310691	0	0	0	0	0	0	0	0	0	0	0	0	0	0	0	0
XLOC_002395|PGSC0003DMT400000025	PGSC0003DMB000000010:1336113-1348929	190289	259275	0	0	244426	21182	29395	266849	529201	327035	0	0	306754	332291	808873	60396
XLOC_002397|-	PGSC0003DMB000000010:1453841-1476507	385208	308031	0	0	359438	648074	27,47	349694	350787	2396663	0	0	422066	172435	643408	660322
XLOC_002398|PGSC0003DMT400000387	PGSC0003DMB000000010:1481884-1491856	559874	560936	463744	281699	616584	416611	477446	365516	444959	59964	196261	309489	515848	400104	0	0
XLOC_002401|-	PGSC0003DMB000000010:1514299-1527196	258349	177688	0	0	302558	458421	347462	173255	30923	227151	182734	23257	418244	440257	25996	252082
XLOC_002402|PGSC0003DMT400000395,PGSC0003DMT400000396	PGSC0003DMB000000010:1527611-1530024	197978	897717	902429	623533	293049	320089	185323	227604	197475	847291	0	0	0	0	344095	0
XLOC_002408|PGSC0003DMT400000430	PGSC0003DMB000000010:1677885-1680184	0	0	0	0	180306	375638	0	0	0	0	0	0	0	0	0	0
XLOC_002409|PGSC0003DMT400000436,PGSC0003DMT400000437,PGSC0003DMT400000438,PGSC0003DMT400000439,PGSC0003DMT400000440	PGSC0003DMB000000010:1681188-1687198	221218	272273	0	0	268748	17546	701031	101479	190196	329191	0	0	0	0	0	0
XLOC_002413|PGSC0003DMT400000443,PGSC0003DMT400000444,PGSC0003DMT400000445,PGSC0003DMT400000446	PGSC0003DMB000000010:1754989-1760428	742194	766524	623966	167851	340796	714156	216552	445647	75138	189233	802231	136206	296559	214864	556145	298818
XLOC_002414|PGSC0003DMT400000447	PGSC0003DMB000000010:1838551-1842221	390118	313174	398875	149133	37055	191892	314562	25008	991831	324746	383654	239783	344974	199722	2651205	460884
XLOC_002415|PGSC0003DMT400000448	PGSC0003DMB000000010:1842557-1853832	472221	31209	674755	919622	37591	365262	290922	151362	879238	375468	0	0	532579	401417	210411	375793
XLOC_002418|PGSC0003DMT400000454,PGSC0003DMT400000455,PGSC0003DMT400000456,PGSC0003DMT400000457,PGSC0003DMT400000458,PGSC0003DMT400000459,PGSC0003DMT400000460,PGSC0003DMT400000461	PGSC0003DMB000000010:1882028-1889356	369394	264415	418493	232681	186187	231878	167746	172207	325285	376853	529406	409514	299578	155835	0	0
XLOC_002419|PGSC0003DMT400000462	PGSC0003DMB000000010:1918272-1921996	242731	250177	112947	783913	206106	256345	233078	169701	189235	204254	63485	690866	127,6	166128	185942	127503
XLOC_002424|PGSC0003DMT400000471	PGSC0003DMB000000010:1990146-1991474	0	0	0	0	0	0	0	0	0	0	0	0	0	0	0	0
XLOC_002426|PGSC0003DMT400000477	PGSC0003DMB000000010:2026578-2029115	182024	228423	0	0	261263	163289	2045268	530273	0	0	0	0	0	0	0	0
XLOC_002427|PGSC0003DMT400000478	PGSC0003DMB000000010:2031183-2035473	0	0	0	0	0	0	0	0	0	0	0	0	0	0	0	0
XLOC_002428|PGSC0003DMT400000479,PGSC0003DMT400000480	PGSC0003DMB000000010:2037474-2044192	298633	216607	0	0	223655	146683	155168	182205	0	0	0	0	0	0	0	0
XLOC_002429|PGSC0003DMT400000481,PGSC0003DMT400000482	PGSC0003DMB000000010:2046444-2049783	424826	516067	491756	269673	451242	572599	576252	498335	371517	467836	17343	222982	461825	363502	382412	867436
XLOC_002430|PGSC0003DMT400000483	PGSC0003DMB000000010:2070591-2073235	763143	976374	452204	134841	118826	598257	930667	846497	525706	584118	478443	269124	430206	962304	104932	831896
XLOC_002431|PGSC0003DMT400000485,PGSC0003DMT400000486	PGSC0003DMB000000010:2080832-2090073	1233396	156869	0	0	213041	161969	979253	101656	0	0	0	0	0	0	0	0
XLOC_002433|PGSC0003DMT400000489	PGSC0003DMB000000010:2127970-2142782	0	0	0	0	880279	256495	2059847	1475155	0	0	0	0	0	0	0	0
XLOC_002434|PGSC0003DMT400000491,PGSC0003DMT400000492,PGSC0003DMT400000493	PGSC0003DMB000000010:2180597-2187535	138795	171278	0	0	609878	161432	391945	786741	0	0	0	0	0	0	0	0
XLOC_002437|PGSC0003DMT400000500	PGSC0003DMB000000010:2270951-2274205	0	0	211868	466719	0	0	0	0	0	0	0	0	0	0	0	0
XLOC_002438|PGSC0003DMT400000501,PGSC0003DMT400000502	PGSC0003DMB000000010:2276064-2281334	476264	299066	160537	121,56	34918	637578	316524	275177	46927	248767	318229	147578	0	0	424869	858954
XLOC_002441|PGSC0003DMT400000504,PGSC0003DMT400000505,PGSC0003DMT400000506	PGSC0003DMB000000010:2343425-2346786	604545	164305	0	0	234512	359581	33495	232953	344951	2826826	0	0	374912	315722	23726	210898
XLOC_002444|PGSC0003DMT400000512,PGSC0003DMT400000513,PGSC0003DMT400000514	PGSC0003DMB000000010:2373639-2377983	0	0	2017144	419091	146265	183116	0	0	0	0	0	0	0	0	120661	26327
XLOC_002445|PGSC0003DMT400000517	PGSC0003DMB000000010:2382768-2391171	0	0	0	0	0	0	0	0	0	0	0	0	0	0	0	0
XLOC_002446|-	PGSC0003DMB000000010:2432048-2448569	0	0	0	0	0	0	0	0	0	0	0	0	0	0	0	0
XLOC_002448|PGSC0003DMT400000537	PGSC0003DMB000000010:2473332-2481064	640835	775087	171779	29748	200617	323298	484044	488548	316555	236683	191312	325453	791317	238087	63901	272657
XLOC_002449|PGSC0003DMT400000194,PGSC0003DMT400000538	PGSC0003DMB000000010:2520399-2529627	375445	163554	0	0	0	0	0	0	0	0	0	0	0	0	0	0
XLOC_002451|PGSC0003DMT400000540,PGSC0003DMT400000542,PGSC0003DMT400000543	PGSC0003DMB000000010:2550249-2555794	412629	151889	0	0	0	0	2615808	1710219	0	0	0	0	0	0	0	0
XLOC_002452|PGSC0003DMT400000546	PGSC0003DMB000000010:2574341-2581917	998281	117635	404459	107272	827237	145017	74,21	682794	121,04	679901	195135	475557	708944	52238	839445	398806
XLOC_002453|PGSC0003DMT400000547	PGSC0003DMB000000010:2585014-2590984	301923	395894	596351	144582	24926	315369	264499	26223	364028	510301	0	0	0	0	264558	335936
XLOC_002455|PGSC0003DMT400000548,PGSC0003DMT400000549	PGSC0003DMB000000010:2594952-2598145	634094	399761	504804	358618	612994	498267	670272	515433	370316	569073	212424	260979	502077	471056	405,81	514217
XLOC_002457|PGSC0003DMT400000553	PGSC0003DMB000000010:2638801-2641745	0	0	0	0	0	0	0	0	0	0	0	0	0	0	0	0
XLOC_002461|PGSC0003DMT400000565,PGSC0003DMT400000566,PGSC0003DMT400000567	PGSC0003DMB000000010:2741453-2747347	152706	2788171	0	0	231592	200732	170477	1949575	222405	658969	0	0	0	0	0	0
XLOC_002462|PGSC0003DMT400000568	PGSC0003DMB000000010:2764368-2772240	1188075	165009	0	0	0	0	975636	132871	0	0	0	0	0	0	0	0
XLOC_002471|PGSC0003DMT400000587,PGSC0003DMT400000588	PGSC0003DMB000000010:2988595-2991338	544256	590092	0	0	255218	401861	26976	247966	33289	376375	156839	367207	0	0	423039	182737
XLOC_002472|PGSC0003DMT400000589	PGSC0003DMB000000010:2991838-2995747	884312	598211	371169	104167	122394	159367	502496	101532	836124	721986	0	0	664684	133374	569625	408962
XLOC_002474|PGSC0003DMT400000592	PGSC0003DMB000000010:3033557-3045701	783584	35116	316032	553706	574894	432162	400936	275537	367473	435437	20969	618965	442988	435569	257455	504956
XLOC_002476|PGSC0003DMT400000593	PGSC0003DMB000000010:3080781-3081298	660482	372978	0	0	0	399938	0	185084	0	0	0	0	0	0	0	0
XLOC_002477|PGSC0003DMT400000594	PGSC0003DMB000000010:3083401-3083842	329673	853271	0	0	456286	665417	806967	123177	498733	448596	0	0	0	234753	0	0
XLOC_002478|PGSC0003DMT400000595	PGSC0003DMB000000010:3085001-3090780	0	0	0	0	0	0	339219	137293	0	0	0	0	0	0	0	0
XLOC_002480|PGSC0003DMT400000597	PGSC0003DMB000000010:3101870-3109316	816653	216485	0	0	333514	138964	156269	156877	13256	250391	0	0	0	0	0	0
XLOC_002481|PGSC0003DMT400000286	PGSC0003DMB000000010:3145302-3149017	414325	155981	2630568	323123	0	0	0,579531	903034	0	0	0	0	0	0	0	0
XLOC_002482|PGSC0003DMT400086405	PGSC0003DMB000000010:3181300-3182868	0	0	0	0	0	0	0	0	0	0	0	0	0	0	0	0
XLOC_002483|PGSC0003DMT400000598,PGSC0003DMT400000599	PGSC0003DMB000000010:3195815-3198027	778917	317133	0	0	0	0	285995	100041	26513	501738	0	0	0	0	0	0
XLOC_002484|PGSC0003DMT400000600	PGSC0003DMB000000010:3211372-3212564	0	0	0	0	0	0	0	0	0	0	0	0	0	0	0	0
XLOC_002486|PGSC0003DMT400000604,PGSC0003DMT400000605	PGSC0003DMB000000010:3222117-3226303	283643	143589	0	0	203787	150826	120617	169651	0	0	0	0	0	0	0	0
XLOC_002487|PGSC0003DMT400000606	PGSC0003DMB000000010:3238478-3241015	763218	139884	0	0	111193	810785	269694	963054	850762	874555	167891	38615	138887	15891	130569	0
XLOC_002488|PGSC0003DMT400000299	PGSC0003DMB000000010:3257890-3269365	0	0	0	0	0	157526	0	0	0	0	0	0	0	0	0	0
XLOC_002489|PGSC0003DMT400000608,PGSC0003DMT400000609,PGSC0003DMT400000610,PGSC0003DMT400000611,PGSC0003DMT400000612	PGSC0003DMB000000010:3306879-3314332	31004	152951	242988	811447	197918	21345	223503	231368	163513	176906	0	0	0	0	0	0
XLOC_002497|-	PGSC0003DMB000000010:3394393-3399081	0	0	0	0	0	0	0	0	0	0	0	0	0	0	0	0
XLOC_002501|PGSC0003DMT400000643,PGSC0003DMT400000644,PGSC0003DMT400000645,PGSC0003DMT400000646	PGSC0003DMB000000010:3474302-3483856	269064	184611	0	0	0	0	839769	24777	0	0	0	0	0	0	0	0
XLOC_002503|PGSC0003DMT400000648,PGSC0003DMT400000649	PGSC0003DMB000000010:3504193-3507700	132211	325776	0	0	187701	100554	824037	221516	0	0	0	0	0	0	921566	245751
XLOC_002504|PGSC0003DMT400000650	PGSC0003DMB000000010:3509741-3513557	0	0	0	0	0	0	524681	875966	0	0	0	0	0	0	0	0
XLOC_002505|PGSC0003DMT400000651	PGSC0003DMB000000010:3519304-3521116	0	0	0	0	0	0	1579584	168899	0	0	0	0	0	0	0	0
XLOC_002506|PGSC0003DMT400000652,PGSC0003DMT400000653	PGSC0003DMB000000010:3543802-3546473	737082	172987	0	0	713156	149923	314537	156075	249032	382436	0	0	0	0	0	0
XLOC_002507|PGSC0003DMT400000343	PGSC0003DMB000000010:3568905-3574883	0	0	0	0	0	0	0	0	0	0	0	0	0	0	0	0
XLOC_002509|PGSC0003DMT400000654	PGSC0003DMB000000010:3611036-3618731	793892	53603	531786	471086	105102	107,49	121666	116071	805646	118361	25968	30296	108967	696402	492568	437838
XLOC_002510|PGSC0003DMT400000655,PGSC0003DMT400000656,PGSC0003DMT400000657,PGSC0003DMT400000658	PGSC0003DMB000000010:3619332-3624986	849067	162819	209302	873135	273368	250035	306697	110699	146067	193006	405496	417566	178,51	270294	153188	30,18
XLOC_002511|PGSC0003DMT400000660	PGSC0003DMB000000010:3630162-3648346	133734	189504	316935	175442	9825	154127	23728	142204	223855	218831	0	0	0	0	0	0
XLOC_002512|-	PGSC0003DMB000000010:3648998-3651736	0	0	0	0	0	0	0	0	0	0	0	0	0	0	0	0
XLOC_002513|PGSC0003DMT400000662	PGSC0003DMB000000010:3681875-3688238	636228	342173	376999	165393	775744	733812	597512	551841	589281	494705	531833	341893	478214	629229	450355	288227
XLOC_002514|PGSC0003DMT400000663,PGSC0003DMT400000664	PGSC0003DMB000000010:3696821-3701134	130952	274262	0	0	0	0	143033	134913	187902	860424	0	0	0	0	0	0
XLOC_002516|PGSC0003DMT400000671,PGSC0003DMT400000672,PGSC0003DMT400000673,PGSC0003DMT400000674,PGSC0003DMT400000675	PGSC0003DMB000000010:3717513-3720982	181713	359174	223114	177344	154337	334595	176616	937241	149746	185259	0	0	0	0	241726	100895
XLOC_002518|PGSC0003DMT400000678,PGSC0003DMT400000679,PGSC0003DMT400000680	PGSC0003DMB000000010:3746307-3754118	0	0	0	0	0	0	0	0	0	0	0	0	0	0	0	0
XLOC_002520|PGSC0003DMT400000682	PGSC0003DMB000000010:3779248-3781146	858688	145472	0	0	322721	141494	373566	269732	0	0	0	0	0	0	0	0
XLOC_002526|PGSC0003DMT400000694	PGSC0003DMB000000010:3882269-3883709	101429	105964	240409	2467154	261114	745789	162586	125061	499787	397491	508719	153887	128,08	280476	880517	353815
XLOC_002527|-	PGSC0003DMB000000010:3913638-3926103	0	0	0	0	0	0	263468	351395	0	0	0	0	0	0	727635	239005
XLOC_002528|-	PGSC0003DMB000000010:2753280-2753504	0	259,73	0	0	169755	0	0	0	0	0	0	0	0	0	0	0
XLOC_002539|PGSC0003DMT400062566	PGSC0003DMB000000011:684486-701263	148811	210087	881785	19,29	154473	171231	134651	1272446	176883	141338	0	0	0	0	0	0
XLOC_002541|PGSC0003DMT400074029,PGSC0003DMT400074030,PGSC0003DMT400074031	PGSC0003DMB000000011:990020-995096	155987	129859	799956	119037	123036	107,37	134889	128243	123968	93121	533527	399582	120716	841613	146136	142461
XLOC_002555|PGSC0003DMT400041198,PGSC0003DMT400041199,PGSC0003DMT400041200,PGSC0003DMT400041201,PGSC0003DMT400041203	PGSC0003DMB000000011:2116923-2125942	23548	21741	209716	178412	173746	458654	158236	922924	926957	221817	0	0	0	0	435466	229316
XLOC_002560|PGSC0003DMT400072183	PGSC0003DMB000000011:2197644-2218592	0	0	0	0	0	0	0	0	0	0	0	0	0	0	0	0
XLOC_002564|-	PGSC0003DMB000000011:2427213-2439968	145276	193703	669514	188829	134047	174541	812809	190738	230242	658912	222638	505956	0	0	289001	255893
XLOC_002603|PGSC0003DMT400074006,PGSC0003DMT400074007,PGSC0003DMT400074008	PGSC0003DMB000000011:1447431-1450922	2480637	140899	0	0	252489	220044	108841	806339	205071	512993	0	0	0	0	0	0
XLOC_002605|PGSC0003DMT400074004,PGSC0003DMT400074005	PGSC0003DMB000000011:1476646-1483545	103,06	642295	474422	600316	136262	507326	105,02	773808	930059	829799	544083	277942	19837	865298	662346	102493
XLOC_002609|-	PGSC0003DMB000000011:1749314-1761386	0	0	0	0	0	0	0	0	0	0	0	0	0	0	0	0
XLOC_002613|PGSC0003DMT400041206	PGSC0003DMB000000011:2027173-2027800	492922	163739	0	0	0	0	486681	243757	0	0	0	0	0	0	0	367798
XLOC_002616|PGSC0003DMT400072183	PGSC0003DMB000000011:2197644-2218592	896229	316316	159319	174737	0	0	564112	837153	0	0	0	0	0	0	0	0
XLOC_002618|PGSC0003DMT400008838,PGSC0003DMT400008840,PGSC0003DMT400008841,PGSC0003DMT400008842,PGSC0003DMT400008843,PGSC0003DMT400008844,PGSC0003DMT400008845,PGSC0003DMT400008846	PGSC0003DMB000000011:2460357-2468293	322366	343564	214577	340644	377649	553423	200377	231649	304358	293034	310924	1078319	0	0	233903	137868
XLOC_002622|-	PGSC0003DMB000000011:2621224-2665154	0	0	224852	139423	0	0	164446	17794	0	0	0	0	0	0	28117	907071
XLOC_002625|-	PGSC0003DMB000000011:2811773-2823625	0	0	0	0	0	0	657354	780417	0	0	0	0	0	0	0	0
XLOC_002633|-	PGSC0003DMB000000011:3169367-3185736	132565	287923	217528	596447	296385	255809	24818	228603	0	0	0	0	0	0	194024	452723
XLOC_002647|PGSC0003DMT400064188,PGSC0003DMT400064189,PGSC0003DMT400064190	PGSC0003DMB000000012:90900-155933	60607	246962	0	0	284239	1809230	1463497	334161	0	0	0	0	0	0	0	0
XLOC_002648|PGSC0003DMT400064191	PGSC0003DMB000000012:158072-168301	191665	260747	169325	339716	217043	283361	156466	13346	212381	170708	0	0	0	0	0	0
XLOC_002650|PGSC0003DMT400064198,PGSC0003DMT400064199,PGSC0003DMT400064200,PGSC0003DMT400064201,PGSC0003DMT400064203	PGSC0003DMB000000012:204574-209801	367821	295682	292369	1501088	151503	144797	100207	215321	298334	207249	0	0	0	0	0	0
XLOC_002653|PGSC0003DMT400064207,PGSC0003DMT400064208,PGSC0003DMT400064209	PGSC0003DMB000000012:219586-223238	287619	664637	173151	300686	164006	330009	153272	250204	389434	259657	142487	213731	0	0	164095	427069
XLOC_002656|-	PGSC0003DMB000000012:233935-254038	285152	19766	279365	171108	184369	43561	186688	100283	267155	185935	0	0	208752	333673	0	0
XLOC_002657|PGSC0003DMT400064215	PGSC0003DMB000000012:265808-267974	132193	597201	0	0	0	0	18,86	160523	0	0	663014	314932	536551	0	393006	0
XLOC_002659|PGSC0003DMT400064219,PGSC0003DMT400064220,PGSC0003DMT400064221,PGSC0003DMT400064222,PGSC0003DMT400064223,PGSC0003DMT400064224,PGSC0003DMT400064225	PGSC0003DMB000000012:331131-337918	196094	420796	213801	168221	238837	56753	16457	219802	589918	153695	275455	81782	0	0	367662	497429
XLOC_002660|PGSC0003DMT400064324	PGSC0003DMB000000012:349644-350405	0	0	0	0	0	0	0	0	0	0	0	0	0	0	0	0
XLOC_002661|PGSC0003DMT400064226,PGSC0003DMT400064227,PGSC0003DMT400064229,PGSC0003DMT400064230	PGSC0003DMB000000012:354935-366208	0	0	0	0	188539	155964	81176	947052	181118	645704	0	0	0	0	0	0
XLOC_002663|PGSC0003DMT400064231,PGSC0003DMT400064232,PGSC0003DMT400064233	PGSC0003DMB000000012:366700-376580	218051	218682	0	0	188927	259596	142531	137094	257002	143769	0	0	0	0	0	0
XLOC_002665|PGSC0003DMT400064236	PGSC0003DMB000000012:417825-420885	0	0	0	0	0	0	0	0	0	0	0	0	0	0	0	0
XLOC_002667|PGSC0003DMT400064250	PGSC0003DMB000000012:453142-455269	144712	27,24	0	0	584179	182556	506034	20276	0	0	0	0	0	0	0	0
XLOC_002668|PGSC0003DMT400064251,PGSC0003DMT400064253	PGSC0003DMB000000012:470957-474572	57719	687843	398039	597164	294072	15815	317992	539168	304583	386175	0	0	55252	252197	364232	971266
XLOC_002669|PGSC0003DMT400064255,PGSC0003DMT400064256	PGSC0003DMB000000012:505746-507276	632743	36,72	249934	229757	0	0	0,442427	985049	461205	344375	0	0	0	0	0	0
XLOC_002670|PGSC0003DMT400064257,PGSC0003DMT400064258,PGSC0003DMT400064260	PGSC0003DMB000000012:512524-517271	47118	63966	155252	384396	402364	479064	410606	358306	490815	455306	0	0	140595	346019	271651	252258
XLOC_002672|PGSC0003DMT400010223,PGSC0003DMT400010224,PGSC0003DMT400010225,PGSC0003DMT400010226,PGSC0003DMT400010227	PGSC0003DMB000000012:532132-537871	135831	150123	0	0	2087302	1740352	949956	797854	0	0	0	0	0	0	0	0
XLOC_002673|PGSC0003DMT400010228	PGSC0003DMB000000012:542105-544522	0	0	0	0	0	0	0	0	0	0	0	0	0	0	0	0
XLOC_002680|PGSC0003DMT400010252,PGSC0003DMT400010253	PGSC0003DMB000000012:723924-726328	0	0	0	0	0	0	0	0	0	0	0	0	0	0	0	0
XLOC_002681|PGSC0003DMT400010254	PGSC0003DMB000000012:728022-737644	228154	230071	0	0	174805	810629	141897	2218789	0	0	0	0	0	0	0	0
XLOC_002682|PGSC0003DMT400010261,PGSC0003DMT400010262,PGSC0003DMT400010263,PGSC0003DMT400010264	PGSC0003DMB000000012:774906-782494	0	0	143701	284912	414661	191393	0	0	0	0	202677	109579	0	0	0	0
XLOC_002684|PGSC0003DMT400010270,PGSC0003DMT400010271	PGSC0003DMB000000012:795478-797882	0	0	0	0	0	0	0	0	0	0	0	0	0	0	0	0
XLOC_002686|PGSC0003DMT400010274,PGSC0003DMT400010275	PGSC0003DMB000000012:862094-868139	0	0	0	0	0	0	0	0	0	0	0	0	0	0	0	0
XLOC_002688|PGSC0003DMT400010279,PGSC0003DMT400010280,PGSC0003DMT400010281	PGSC0003DMB000000012:872233-884714	403062	368049	372646	401256	394346	70427	334185	387435	522349	386752	289689	294725	351354	27875	295836	209206
XLOC_002689|PGSC0003DMT400010287,PGSC0003DMT400010288	PGSC0003DMB000000012:890607-896743	621311	39575	378212	924972	698369	395444	365555	463265	341125	288724	2582936	243558	466786	793331	28,72	355581
XLOC_002690|PGSC0003DMT400010291,PGSC0003DMT400010292	PGSC0003DMB000000012:935624-945960	365774	434074	252839	443914	364761	38539	210646	361868	382421	338124	299823	377663	358588	327673	30719	250216
XLOC_002691|PGSC0003DMT400010293	PGSC0003DMB000000012:957442-958748	912561	935072	505855	459152	957461	547485	102526	811162	610742	745049	738218	350653	929306	85594	350067	700134
XLOC_002692|PGSC0003DMT400010294	PGSC0003DMB000000012:972675-976219	13918	261987	274906	256284	342459	1869586	12005	216677	0	0	0	0	174356	348711	0	0
XLOC_002693|PGSC0003DMT400010295	PGSC0003DMB000000012:978864-982130	367158	633528	290082	318154	254084	511696	393726	457276	449643	466297	0	0	551941	266288	0	0
XLOC_002694|PGSC0003DMT400010296	PGSC0003DMB000000012:985038-985959	0	0	0	0	0	0	0	0	0	0	0	0	0	0	0	0
XLOC_002695|PGSC0003DMT400010297	PGSC0003DMB000000012:992520-993120	0	0	0	0	0	0	0	0	0	0	0	0	0	0	0	0
XLOC_002696|PGSC0003DMT400040809,PGSC0003DMT400040813	PGSC0003DMB000000012:1021503-1032661	233653	221014	179475	576143	225274	192488	1467089	484189	0	0	0	0	0	0	0	0
XLOC_002699|PGSC0003DMT400040804	PGSC0003DMB000000012:1077660-1086316	153056	283544	188776	407807	277979	216123	961152	1941936	215521	271074	349388	259339	282964	810444	0	0
XLOC_002700|PGSC0003DMT400040802,PGSC0003DMT400040803	PGSC0003DMB000000012:1086915-1088861	0	0	0	0	0	0	0	0	0	0	0	0	0	0	0	0
XLOC_002701|PGSC0003DMT400040795,PGSC0003DMT400040796,PGSC0003DMT400040797,PGSC0003DMT400040798,PGSC0003DMT400040799	PGSC0003DMB000000012:1089746-1099040	44552	489129	330248	230805	490414	458512	359896	324274	586173	362237	0	0	522208	454352	320414	218994
XLOC_002704|-	PGSC0003DMB000000012:1255905-1258050	22938	323831	244657	0	307769	2612886	130709	1704862	0	0	0	0	0	0	0	0
XLOC_002714|PGSC0003DMT400025236	PGSC0003DMB000000012:1729135-1748076	0	0	0	0	0	0	0	0	0	0	0	0	0	0	0	0
XLOC_002742|-	PGSC0003DMB000000012:3223696-3234947	387345	31097	381595	405338	42703	248906	362226	486096	0	0	0	0	349408	44318	0	0
XLOC_002745|PGSC0003DMT400093464	PGSC0003DMB000000012:3330966-3347018	273459	444196	0	0	261349	2552956	343369	264584	0	0	0	0	425787	10818	252927	199591
XLOC_002747|-	PGSC0003DMB000000012:3365483-3379747	107214	102566	116183	473605	119836	110211	981766	914618	531959	114054	18669	52829	105,19	107104	52051	124549
XLOC_002749|PGSC0003DMT400064262	PGSC0003DMB000000012:25038-27168	0	0	0	0	0	0	0,292565	840698	0	0	0	0	0	0	0	0
XLOC_002750|PGSC0003DMT400064263,PGSC0003DMT400064264	PGSC0003DMB000000012:72176-76892	282369	274618	275147	611697	217119	1075611	1639179	169976	187142	307383	0	0	0	0	522332	318379
XLOC_002751|PGSC0003DMT400064270,PGSC0003DMT400064271	PGSC0003DMB000000012:90900-155933	125049	108291	105412	190196	810529	175317	668306	93239	912857	937962	515939	600371	117115	865523	120932	759458
XLOC_002752|PGSC0003DMT400064269,PGSC0003DMT400064270	PGSC0003DMB000000012:90900-155933	120856	341241	0	0	0	235226	169045	460968	470142	0	0	0	0	0	455119	13940
XLOC_002753|PGSC0003DMT400064273	PGSC0003DMB000000012:158072-168301	164888	2459088	0	0	136928	237725	2649805	924102	0	0	0	0	0	0	0	0
XLOC_002754|PGSC0003DMT400064274	PGSC0003DMB000000012:177866-180534	0	0	0	0	168769	486835	806875	832351	0	0	0	0	0	0	0	0
XLOC_002756|PGSC0003DMT400064276,PGSC0003DMT400064277,PGSC0003DMT400064278	PGSC0003DMB000000012:196122-199720	103125	447621	101134	88317	128057	82539	246756	558168	362439	142112	269726	187852	482157	962353	435536	673705
XLOC_002761|PGSC0003DMT400064286,PGSC0003DMT400064287	PGSC0003DMB000000012:269172-273146	300099	469888	0	0	138043	146318	738598	183481	120279	19601	0	0	0	0	0	0
XLOC_002762|PGSC0003DMT400064288,PGSC0003DMT400064289	PGSC0003DMB000000012:282150-284315	169848	1425816	0	0	0	0	0	0	0	0	0	0	0	0	0	0
XLOC_002763|PGSC0003DMT400064290	PGSC0003DMB000000012:295329-297805	0	0	0	0	0	0	0	0	0	0	0	0	0	0	0	0
XLOC_002764|PGSC0003DMT400064291,PGSC0003DMT400064292	PGSC0003DMB000000012:298502-312576	0	0	0	0	0	0	164763	169087	0	0	0	0	0	0	0	0
XLOC_002766|PGSC0003DMT400064295	PGSC0003DMB000000012:338219-342578	0	0	0	29606	0	0	0	0	0	0	0	0	0	0	0	0
XLOC_002767|PGSC0003DMT400064304,PGSC0003DMT400064305	PGSC0003DMB000000012:344008-345431	788129	142615	165177	780901	286194	100587	379508	612677	120625	168776	356406	388806	349607	1985368	121425	371423
XLOC_002768|PGSC0003DMT400064306	PGSC0003DMB000000012:376670-378366	421537	848585	259035	441374	216085	634751	324289	838544	506116	178453	0	0	633688	148231	297059	321814
XLOC_002769|PGSC0003DMT400064307	PGSC0003DMB000000012:435851-437833	0	0	0	0	0	0	0	0	0	0	0	0	0	0	0	0
XLOC_002771|PGSC0003DMT400086367	PGSC0003DMB000000012:474620-476389	0	0	0	0	0	0	0	0	0	0	0	0	0	0	0	0
XLOC_002772|PGSC0003DMT400064311,PGSC0003DMT400064312	PGSC0003DMB000000012:477829-486997	0	0	0	0	0	0	0	0	0	0	0	0	0	0	0	0
XLOC_002773|PGSC0003DMT400064313,PGSC0003DMT400064314	PGSC0003DMB000000012:489342-490973	0	0	0	0	0	0	0	0	0	0	0	0	0	0	0	0
XLOC_002775|PGSC0003DMT400064315	PGSC0003DMB000000012:521043-524522	811547	82746	676802	146506	894421	481011	416217	364989	448215	515339	0	0	406661	321048	339567	333609
XLOC_002777|PGSC0003DMT400010301,PGSC0003DMT400010302,PGSC0003DMT400010303	PGSC0003DMB000000012:546043-552339	56516	588153	339688	936138	193318	526354	416908	258175	373562	622438	233515	479761	419878	683804	330136	142984
XLOC_002780|PGSC0003DMT400010308	PGSC0003DMB000000012:673151-675471	0	0	0	0	0	0	0	0	0	0	0	0	0	0	0	0
XLOC_002781|-	PGSC0003DMB000000012:689819-708781	2699844	166059	0	509273	0	0	325509	2479907	0	0	428877	418685	0	0	0	0
XLOC_002782|PGSC0003DMT400010324,PGSC0003DMT400010325,PGSC0003DMT400010326,PGSC0003DMT400010327	PGSC0003DMB000000012:757118-760508	0	0	0	0	0	0	0	0	0	0	0	0	0	0	0	0
XLOC_002786|PGSC0003DMT400010341	PGSC0003DMB000000012:812713-814091	0	0	0	0	138054	301993	0	0	375086	162873	0	0	0	0	332127	316312
XLOC_002787|PGSC0003DMT400010342	PGSC0003DMB000000012:828314-829696	0	0	0	0	0	0	0	0	0	0	0	0	0	0	0	0
XLOC_002791|PGSC0003DMT400010346,PGSC0003DMT400010347	PGSC0003DMB000000012:872233-884714	0	0	0	0	0	0	879977	979417	0	0	0	0	0	0	0	0
XLOC_002792|PGSC0003DMT400010348	PGSC0003DMB000000012:904162-905796	489105	20715	0	0	0	0	0,684126	837585	0	0	0	0	0	0	0	0
XLOC_002794|PGSC0003DMT400010349,PGSC0003DMT400010350,PGSC0003DMT400010351,PGSC0003DMT400010352,PGSC0003DMT400010353	PGSC0003DMB000000012:946318-954164	958515	821345	106472	618923	595678	668413	396199	275084	564654	858551	268933	189913	24,25	296698	198411	691072
XLOC_002795|-	PGSC0003DMB000000012:997729-998277	0	0	0	0	981605	0	496006	44165	0	115807	0	0	0	0	0	0
XLOC_002796|-	PGSC0003DMB000000012:999324-1011561	326701	343455	611744	150204	303282	327942	183744	172731	252389	470068	289804	262789	26,52	320022	0	0
XLOC_002798|PGSC0003DMT400040786,PGSC0003DMT400040787	PGSC0003DMB000000012:1044888-1051117	190426	29188	0	0	135545	334157	139266	142306	218705	151029	0	0	291998	193715	0	0
XLOC_002799|PGSC0003DMT400040782,PGSC0003DMT400040783,PGSC0003DMT400040784,PGSC0003DMT400040785	PGSC0003DMB000000012:1062610-1064346	0	0	0	0	0	145076	281839	1766527	0	0	0	0	0	0	0	0
XLOC_002804|PGSC0003DMT400040771,PGSC0003DMT400040772	PGSC0003DMB000000012:1194126-1200842	176912	211139	0	0	27218	139568	554379	992525	157996	270082	0	0	887176	289263	495584	235699
XLOC_002809|PGSC0003DMT400025243,PGSC0003DMT400025244,PGSC0003DMT400025245,PGSC0003DMT400025246,PGSC0003DMT400025247	PGSC0003DMB000000012:1620508-1630412	229875	376109	202601	519014	203972	27237	1646119	16473	0	0	0	0	0	0	0	0
XLOC_002810|PGSC0003DMT400025238,PGSC0003DMT400025239	PGSC0003DMB000000012:1688577-1693569	243887	199338	0	0	41454	155452	166976	187844	2088063	167679	0	0	154465	335147	0	0
XLOC_002812|PGSC0003DMT400025237	PGSC0003DMB000000012:1729135-1748076	237469	376535	0	0	0	0	585977	736868	0	0	0	0	0	0	0	0
XLOC_002813|PGSC0003DMT400025237	PGSC0003DMB000000012:1729135-1748076	0	0	0	0	0	0	0	0	0	0	0	0	0	0	0	0
XLOC_002833|PGSC0003DMT400002856,PGSC0003DMT400002857,PGSC0003DMT400002858	PGSC0003DMB000000012:2979763-2983571	206429	216415	13718	240777	159125	143656	147101	1336363	852812	201652	0	0	0	0	170044	263002
XLOC_002843|PGSC0003DMT400045948	PGSC0003DMB000000012:3400804-3407283	325003	346123	0	0	244633	266759	266239	239657	280951	214136	171577	222752	182116	290618	278265	180844
XLOC_002847|PGSC0003DMT400045950,PGSC0003DMT400045951	PGSC0003DMB000000012:3502722-3508155	305933	355375	0	0	194076	379824	219494	214323	0	0	0	0	962894	393337	275028	203125
XLOC_002848|-	PGSC0003DMB000000012:3521068-3531771	0	0	771584	284964	422121	323534	2316521	1917433	0	0	204478	12058	0	0	0	0
XLOC_002851|-	PGSC0003DMB000000012:998897-999113	0	0	0	0	318716	0	0	0	0	0	0	0	0	0	0	0
XLOC_002852|-	PGSC0003DMB000000012:1639129-1640399	0	0	0	0	0	0	134024	617257	0	0	0	0	0	0	0	0
XLOC_002853|-	PGSC0003DMB000000012:2557229-2557474	188091	212433	0	0	104132	650822	426205	175693	0	0	0	0	848261	357163	0	0
XLOC_002857|PGSC0003DMT400045066	PGSC0003DMB000000013:131372-135643	157641	164853	0	0	808087	146466	783989	2951831	0	0	0	0	0	0	0	0
XLOC_002858|PGSC0003DMT400045068,PGSC0003DMT400045070	PGSC0003DMB000000013:162733-164258	0	0	0	0	0	0	0	0	774527	0	0	0	0	0	710313	0
XLOC_002859|PGSC0003DMT400045071,PGSC0003DMT400045072	PGSC0003DMB000000013:165420-167894	950004	101,85	666922	545073	725773	779073	699238	778872	601428	700035	367477	376354	725991	519675	405011	383499
XLOC_002861|PGSC0003DMT400045075	PGSC0003DMB000000013:185716-191319	0	0	0	0	0	0	467818	846118	0	0	0	0	0	0	0	0
XLOC_002868|PGSC0003DMT400045083	PGSC0003DMB000000013:431742-444134	934212	146458	143053	159824	725184	101748	861816	880758	771368	718802	425802	913568	136982	123337	528966	76875
XLOC_002875|PGSC0003DMT400045089	PGSC0003DMB000000013:617461-624427	224997	219064	101141	272281	182549	24161	110691	17393	0	0	0	0	0	0	0	0
XLOC_002877|PGSC0003DMT400045090,PGSC0003DMT400045091	PGSC0003DMB000000013:726622-732520	0	0	0	0	155724	424603	0	0	0	0	0	0	0	0	0	0
XLOC_002884|PGSC0003DMT400071840,PGSC0003DMT400071842,PGSC0003DMT400071843,PGSC0003DMT400071844	PGSC0003DMB000000013:947802-954610	0	0	0	0	499017	141875	403458	780752	0	0	0	0	0	0	0	0
XLOC_002885|-	PGSC0003DMB000000013:1028799-1031076	43628	335959	0	0	301918	188699	324536	407522	334291	356196	0	0	0	0	0	0
XLOC_002897|-	PGSC0003DMB000000013:1693030-1707411	622754	468522	205387	132144	347084	211065	364802	234503	376218	540056	970817	244471	244529	412352	22805	499133
XLOC_002898|-	PGSC0003DMB000000013:1805790-1820653	266119	150137	534656	186276	503217	263612	751973	2402872	259513	701626	0	0	0	0	0	0
XLOC_002901|PGSC0003DMT400013687	PGSC0003DMB000000013:2039303-2041380	0	0	380687	0	860452	142854	0	0	428352	560234	0	0	0	0	0	0
XLOC_002903|PGSC0003DMT400013692	PGSC0003DMB000000013:2132989-2140832	319357	347654	0	0	239642	226338	224423	233554	239492	245028	808975	20781	0	0	0	0
XLOC_002905|-	PGSC0003DMB000000013:2232474-2278372	143088	257568	312539	843375	255762	24856	207507	2514605	1678962	266255	0	0	1737734	369915	100442	274349
XLOC_002910|PGSC0003DMT400066088	PGSC0003DMB000000013:2945234-2976369	232314	27765	0	0	282874	10675	207814	378717	0	0	0	0	307748	183798	0	0
XLOC_002912|-	PGSC0003DMB000000013:3127855-3157007	0	0	0	0	0	0	2373652	0	0	0	0	0	0	0	0	0
XLOC_002913|PGSC0003DMT400084244,PGSC0003DMT400084245,PGSC0003DMT400084247	PGSC0003DMB000000013:3217715-3232367	0	0	0	0	0	0	783235	1084377	0	0	0	0	0	0	21520	253502
XLOC_002917|-	PGSC0003DMB000000013:99572-101370	0	0	0	0	0	0	0	0	0	0	0	0	0	0	0	0
XLOC_002918|-	PGSC0003DMB000000013:116441-121577	0	0	0	0	339221	169611	0	0	0	0	0	0	0	0	0	0
XLOC_002919|PGSC0003DMT400045098,PGSC0003DMT400045099	PGSC0003DMB000000013:137788-141739	0	0	891703	398744	16105	171402	11763	1723124	149528	192314	0	0	0	0	0	0
XLOC_002921|-	PGSC0003DMB000000013:207074-212841	0	0	0	0	0	0	0	0	0	0	0	0	0	0	0	0
XLOC_002929|PGSC0003DMT400045111,PGSC0003DMT400045112,PGSC0003DMT400045113,PGSC0003DMT400045114	PGSC0003DMB000000013:536523-543134	410869	248116	0	0	149562	131716	837576	206088	0	0	0	0	0	0	0	0
XLOC_002931|PGSC0003DMT400045115	PGSC0003DMB000000013:562142-564237	0	0	0	0	0	0	12615	153171	0	0	0	0	0	0	0	0
XLOC_002938|-	PGSC0003DMB000000013:786114-799593	0	0	0	0	220081	186098	219798	153372	0	0	0	0	0	0	0	0
XLOC_002943|PGSC0003DMT400071826,PGSC0003DMT400071827,PGSC0003DMT400071828,PGSC0003DMT400071829,PGSC0003DMT400071830	PGSC0003DMB000000013:910259-915218	0	0	0	0	0	0	0	0	0	0	0	0	0	0	0	0
XLOC_002944|PGSC0003DMT400071822	PGSC0003DMB000000013:967897-974735	203551	21101	133755	275666	206046	276111	205046	183813	232543	184287	0	0	0	0	0	0
XLOC_002945|PGSC0003DMT400071819,PGSC0003DMT400071820,PGSC0003DMT400071821	PGSC0003DMB000000013:1005167-1009631	429558	529054	310454	344367	228087	462885	140204	295938	433863	315207	874814	133743	314451	122965	341084	189528
XLOC_002952|PGSC0003DMT400005645,PGSC0003DMT400005652	PGSC0003DMB000000013:1452673-1457463	0	0	0	0	0	0	0	0	404181	0	0	0	0	0	0	0
XLOC_002957|-	PGSC0003DMB000000013:1629304-1640367	626256	565174	27908	164330	620663	357558	474315	417714	481265	319914	236218	265751	265505	572931	532078	485405
XLOC_002959|PGSC0003DMT400049035	PGSC0003DMB000000013:1845546-1880607	568024	366089	997385	1097829	236817	228344	264795	673687	494662	28399	0	481835	888399	549726	0	0
XLOC_002960|-	PGSC0003DMB000000013:1941670-1952090	297503	387808	397858	572179	427767	564278	281773	302946	469911	386366	765033	207732	31003	353133	172611	24223
XLOC_002961|PGSC0003DMT400013703	PGSC0003DMB000000013:2042329-2045459	388319	354728	135353	823907	790376	889173	431328	1747230	725679	932467	515545	0	0	0	597605	253529
XLOC_002965|-	PGSC0003DMB000000013:2354003-2375436	0	0	0	0	0	0	451086	878417	0	0	0	0	0	0	0	0
XLOC_002966|PGSC0003DMT400013708,PGSC0003DMT400013709	PGSC0003DMB000000013:2426029-2430638	341571	445808	2387135	194611	231943	47586	872599	287975	703562	543288	0	0	0	0	346209	0
XLOC_002971|PGSC0003DMT400084243	PGSC0003DMB000000013:2988638-3005898	0	0	574041	307661	0	0	0	0	0	0	0	0	0	0	355761	0
XLOC_002972|-	PGSC0003DMB000000013:3080620-3111631	0	0	0	0	213402	1089825	0	0	223875	650571	0	0	0	0	0	0
XLOC_002973|-	PGSC0003DMB000000013:3127855-3157007	0	0	0	0	0	0	0	0	0	0	0	0	0	0	0	0
XLOC_002974|PGSC0003DMT400084233	PGSC0003DMB000000013:3240805-3249947	255512	288578	30281	224177	318279	176821	209075	143202	281623	375498	0	0	0	0	136734	405137
XLOC_002981|-	PGSC0003DMB000000013:3080620-3111631	0	0	25139	2288551	293593	183495	572217	483888	432239	643265	303975	911923	273328	179821	324329	864879
XLOC_003029|PGSC0003DMT400049863,PGSC0003DMT400049864	PGSC0003DMB000000014:2916922-2934220	0	0	607851	274538	144019	177031	0	0	209001	692654	0	0	0	0	0	0
XLOC_003038|PGSC0003DMT400049855,PGSC0003DMT400049856,PGSC0003DMT400049857,PGSC0003DMT400049858	PGSC0003DMB000000014:3179375-3187983	674269	481132	323466	0	462343	373797	324692	248765	152088	366419	619225	210885	306237	445076	806555	332792
XLOC_003054|-	PGSC0003DMB000000014:343568-355406	170639	315352	1455767	504968	24416	272558	139231	16692	0	0	0	0	0	0	0	0
XLOC_003103|PGSC0003DMT400062003,PGSC0003DMT400062004	PGSC0003DMB000000015:376791-384431	464176	351067	0	0	229445	387188	337587	511203	215495	216555	0	0	524391	157394	275997	181461
XLOC_003114|PGSC0003DMT400059129,PGSC0003DMT400059130	PGSC0003DMB000000015:1131804-1135081	0	0	0	0	0	0	0	0	0	0	0	0	0	0	0	0
XLOC_003117|PGSC0003DMT400038933	PGSC0003DMB000000015:1421858-1424967	142947	241048	202348	387087	225325	219829	111636	178033	190508	252866	0	0	0	0	0	0
XLOC_003125|PGSC0003DMT400041005	PGSC0003DMB000000015:1925549-1937158	930777	133067	164414	379026	121079	978416	902271	756619	802077	113026	642632	646325	108926	123408	392309	831321
XLOC_003126|PGSC0003DMT400091476	PGSC0003DMB000000015:1962506-1963205	0	0	0	0	0	0	154297	11449	0	0	0	368847	0	0	0	0
XLOC_003139|PGSC0003DMT400038238,PGSC0003DMT400038240	PGSC0003DMB000000015:2688443-2693953	386706	325404	51,99	15946	442664	334461	220983	285288	279662	552285	1635101	488821	301784	273596	299029	301793
XLOC_003154|PGSC0003DMT400061991	PGSC0003DMB000000015:102315-353684	37503	789188	0	0	0	0	299775	0	0	0	151444	327425	0	0	0	0
XLOC_003157|PGSC0003DMT400061995	PGSC0003DMB000000015:102315-353684	0	0	0	0	0	0	0	0	0	0	0	0	0	0	0	0
XLOC_003173|PGSC0003DMT400038935	PGSC0003DMB000000015:1270945-1274437	0	0	0	0	0	0	962375	933812	0	0	0	0	0	0	0	0
XLOC_003183|-	PGSC0003DMB000000015:1965229-1966525	0	0	0	0	0	0	161393	153971	356238	269158	826738	124011	0	0	261363	696967
XLOC_003184|PGSC0003DMT400040997,PGSC0003DMT400040998,PGSC0003DMT400040999	PGSC0003DMB000000015:1968331-1975319	285802	367523	235937	300043	299033	337942	166054	246427	344386	482328	0	0	0	0	0	0
XLOC_003190|-	PGSC0003DMB000000015:2393545-2404744	269886	352895	0	0	249394	566154	406568	0	251273	170113	0	0	313224	197627	991703	724632
XLOC_003209|PGSC0003DMT400008432,PGSC0003DMT400008433	PGSC0003DMB000000015:2816017-2819125	651529	264312	0	0	178277	232449	573416	678535	398141	244567	0	0	634659	114,69	258934	0
XLOC_003215|-	PGSC0003DMB000000015:102315-353684	193045	174421	0	0	0	0	0	0	0	0	0	0	0	0	0	0
XLOC_003216|-	PGSC0003DMB000000015:102315-353684	233162	282145	157898	389652	507114	34576	251587	342246	30234	326335	0	0	0	0	0	0
XLOC_003217|-	PGSC0003DMB000000015:1961272-1962306	0	0	0	0	217091	370042	137619	2912750	184899	302686	715172	339707	0	0	0	0
XLOC_003218|-	PGSC0003DMB000000015:2709577-2709977	0	0	0	0	0	0	0	0	0	0	0	0	0	0	0	0
XLOC_003219|-	PGSC0003DMB000000015:2965555-2965806	100215	47,16	237531	130259	0	144482	378469	249624	173264	218185	837714	293,2	301302	277515	278074	953397
XLOC_003222|PGSC0003DMT400007674	PGSC0003DMB000000016:72659-73153	0	0	0	0	0	0	183712	0	0	0	0	0	0	0	0	0
XLOC_003234|PGSC0003DMT400007684	PGSC0003DMB000000016:650902-653022	248134	854408	286894	247793	242915	20941	540926	237431	400231	335997	424957	379426	245644	517145	352655	518187
XLOC_003239|-	PGSC0003DMB000000016:1190038-1208451	308585	241781	161687	602397	141839	326404	0	0	266339	110989	0	0	0	0	0	0
XLOC_003246|PGSC0003DMT400061679	PGSC0003DMB000000016:1580868-1583277	0	0	0	0	0	0	0	0	0	0	0	0	0	0	0	0
XLOC_003269|PGSC0003DMT400007648,PGSC0003DMT400007649,PGSC0003DMT400007650	PGSC0003DMB000000016:110761-114564	0	0	0	0	0	0	0	0	0	0	0	0	0	0	0	0
XLOC_003270|PGSC0003DMT400007644	PGSC0003DMB000000016:130665-132837	0	0	0	0	0	0	0	0	0	0	0	0	0	0	0	0
XLOC_003272|-	PGSC0003DMB000000016:137635-161986	950489	223026	155529	239237	15724	158255	147098	652661	0	0	0	0	0	0	0	0
XLOC_003273|-	PGSC0003DMB000000016:186245-187894	918676	189048	245606	174054	308908	358548	739712	41694	306305	655513	0	0	0	368934	0	0
XLOC_003278|PGSC0003DMT400007616,PGSC0003DMT400007617	PGSC0003DMB000000016:318874-319534	0	0	0	0	185143	462856	101037	0	0	0	0	0	0	0	0	0
XLOC_003279|PGSC0003DMT400007615	PGSC0003DMB000000016:424987-426415	0	0	0	0	0	0	0	0	0	0	0	0	0	0	0	0
XLOC_003288|-	PGSC0003DMB000000016:1190038-1208451	0	0	0	0	0	0	0	0	0	0	0	0	0	0	0	0
XLOC_003292|-	PGSC0003DMB000000016:1631697-1651877	0	0	0	0	0	0	0	0	0	0	0	0	0	0	0	0
XLOC_003293|-	PGSC0003DMB000000016:1674519-1691285	118836	702115	613213	116357	894835	819923	106463	88,92	86137	162416	731898	291009	39085	885367	690046	420578
XLOC_003300|PGSC0003DMT400061682	PGSC0003DMB000000016:2087127-2139331	0	0	0	0	0	0	0	0	0	0	0	0	0	0	0	0
XLOC_003306|PGSC0003DMT400061642	PGSC0003DMB000000016:2362509-2370916	288223	368412	120013	934046	167114	448107	1583236	225566	323232	620700	556745	1854673	404004	2750247	254748	988113
XLOC_003314|PGSC0003DMT400035894,PGSC0003DMT400035895,PGSC0003DMT400035896,PGSC0003DMT400035897,PGSC0003DMT400035898,PGSC0003DMT400035899	PGSC0003DMB000000016:2875287-2883073	312375	138048	22905	213667	188067	142996	237382	147368	0	0	0	0	0	0	0	0
XLOC_003325|-	PGSC0003DMB000000016:180951-181780	0	0	0	0	0	0	0	0	745545	250356	0	0	0	0	0	0
XLOC_003329|PGSC0003DMT400020973	PGSC0003DMB000000017:59280-62574	0	0	0	0	0	0	0	0	0	0	0	0	0	0	0	0
XLOC_003330|PGSC0003DMT400020972	PGSC0003DMB000000017:77758-81675	1082,3	863,94	759,61	320,46	929634	833896	951981	656618	450597	891524	192543	501324	625834	749894	418,65	468924
XLOC_003331|PGSC0003DMT400020970,PGSC0003DMT400020971	PGSC0003DMB000000017:104963-106968	0	0	0	0	136708	284798	0	0	0	0	0	0	0	0	0	0
XLOC_003332|PGSC0003DMT400020968,PGSC0003DMT400020969	PGSC0003DMB000000017:111262-114280	376544	267,44	179418	620617	437342	160511	292,88	214,66	966458	223,12	234888	934543	133051	273657	60936	160033
XLOC_003334|PGSC0003DMT400020962,PGSC0003DMT400020963	PGSC0003DMB000000017:141208-164059	527691	526542	458912	642644	606392	888415	266267	339168	58881	389669	609948	174613	316244	39721	320448	365745
XLOC_003335|PGSC0003DMT400020954,PGSC0003DMT400020955,PGSC0003DMT400020958	PGSC0003DMB000000017:176167-183705	282806	390786	240507	525506	231858	757117	18393	245662	502375	228433	179089	790309	395341	270057	37652	780726
XLOC_003336|PGSC0003DMT400020949	PGSC0003DMB000000017:224467-226716	0	0	0	0	0	0	0	0	0	0	0	0	0	0	0	0
XLOC_003338|PGSC0003DMT400020945	PGSC0003DMB000000017:244036-247392	982816	203501	0	0	906847	357071	329927	134645	331347	427951	0	0	0	0	280501	726743
XLOC_003339|PGSC0003DMT400020941,PGSC0003DMT400020942,PGSC0003DMT400020943,PGSC0003DMT400020944	PGSC0003DMB000000017:269692-278203	156407	143647	0	0	0	0	0	0	0	0	0	0	0	0	0	0
XLOC_003340|PGSC0003DMT400020937,PGSC0003DMT400020938	PGSC0003DMB000000017:292426-300030	173938	23,33	195845	276166	318578	234847	101539	1039390	168366	221653	0	0	0	0	0	0
XLOC_003341|PGSC0003DMT400020936	PGSC0003DMB000000017:305502-307982	376908	461465	142421	779563	886764	401936	855734	209921	415489	209575	341507	121681	0	0	276399	152526
XLOC_003342|-	PGSC0003DMB000000017:329434-350831	445763	604945	638104	429133	352041	474589	416532	360503	32802	574667	220411	303143	450918	353148	269541	489957
XLOC_003343|PGSC0003DMT400020930,PGSC0003DMT400020931,PGSC0003DMT400020932	PGSC0003DMB000000017:361030-365300	219956	234544	0	0	0	0	0	0	0	0	0	0	0	0	0	0
XLOC_003344|PGSC0003DMT400020929	PGSC0003DMB000000017:366102-371258	0	0	0	0	0	0	0	0	0	0	0	0	0	0	0	0
XLOC_003345|PGSC0003DMT400020927,PGSC0003DMT400020928	PGSC0003DMB000000017:372440-378566	204406	177222	1406824	174137	214774	142723	153135	199437	133735	253503	0	0	0	0	0	0
XLOC_003346|PGSC0003DMT400020923	PGSC0003DMB000000017:393150-396409	0	0	0	0	0	0	0	0	0	0	0	0	0	0	0	0
XLOC_003350|PGSC0003DMT400020915	PGSC0003DMB000000017:414248-415089	0	0	0	0	0	0	0	0	0	0	0	0	0	0	0	0
XLOC_003352|PGSC0003DMT400020911	PGSC0003DMB000000017:450496-455665	79938	626965	378941	173172	368795	338062	469609	564164	345518	783173	133643	28956	88124	421646	232373	394329
XLOC_003353|PGSC0003DMT400020910	PGSC0003DMB000000017:466720-469305	0	0	0	0	0	0	0	0	0	0	0	0	0	0	0	0
XLOC_003355|-	PGSC0003DMB000000017:502351-507448	0	0	0	0	0	0	0	0	0	0	0	0	0	0	0	0
XLOC_003356|PGSC0003DMT400020896	PGSC0003DMB000000017:516068-521932	0	0	0	0	0	0	0	0	0	0	0	0	0	0	0	0
XLOC_003361|PGSC0003DMT400020885,PGSC0003DMT400020886	PGSC0003DMB000000017:593885-601497	0	0	0	0	0	0	224108	864758	0	0	0	0	0	0	0	0
XLOC_003363|-	PGSC0003DMB000000017:616748-628648	0	0	196969	363063	187796	783816	10794	421911	0	0	0	0	0	0	161041	285482
XLOC_003364|PGSC0003DMT400020875,PGSC0003DMT400020876,PGSC0003DMT400020877,PGSC0003DMT400020878,PGSC0003DMT400020879	PGSC0003DMB000000017:630507-647237	117497	117114	10465	224835	185245	271335	377383	932172	161039	1477681	131,6	305484	117317	151532	186477	20427
XLOC_003365|PGSC0003DMT400020874	PGSC0003DMB000000017:655844-660573	32964	508224	444372	11843	211249	240265	240848	255235	198083	536476	0	0	0	0	137621	249553
XLOC_003366|PGSC0003DMT400020873	PGSC0003DMB000000017:681589-686058	287388	240429	252286	601824	324102	386712	410912	357926	483072	208564	373695	160155	432025	32844	430364	270032
XLOC_003368|PGSC0003DMT400020871	PGSC0003DMB000000017:745957-746726	183277	132381	782943	706359	123883	156698	169,91	151,29	107774	135715	320661	427548	105722	141637	114044	743401
XLOC_003369|PGSC0003DMT400020870	PGSC0003DMB000000017:758074-760508	148234	231,57	892764	947575	184984	171,32	113187	122574	102409	121024	0	0	131,51	161504	650206	577961
XLOC_003371|PGSC0003DMT400020867	PGSC0003DMB000000017:775977-782289	772526	121744	993596	583795	862007	580197	874497	727198	489218	120277	901047	465554	594164	682294	319019	588715
XLOC_003373|PGSC0003DMT400020864,PGSC0003DMT400020865,PGSC0003DMT400020866	PGSC0003DMB000000017:812951-820628	0	0	0	0	0	0	0	0	0	0	0	0	0	0	0	0
XLOC_003378|PGSC0003DMT400002935,PGSC0003DMT400002938	PGSC0003DMB000000017:881294-891926	568184	646207	706557	952439	291268	808989	335267	584706	721722	393626	311974	329609	570976	434684	400234	82939
XLOC_003380|PGSC0003DMT400002933	PGSC0003DMB000000017:910812-916052	220942	204105	184463	209133	355821	183558	163407	151925	178398	229408	149116	111106	107791	326556	797238	757954
XLOC_003381|PGSC0003DMT400002930,PGSC0003DMT400002931,PGSC0003DMT400002932	PGSC0003DMB000000017:929114-936448	0	0	0	272063	0	0	0	0	0	0	0	0	0	0	0	0
XLOC_003383|PGSC0003DMT400002927,PGSC0003DMT400002928,PGSC0003DMT400002929	PGSC0003DMB000000017:960772-966858	0	0	0	0	181751	110266	15801	225217	0	0	0	0	0	0	0	0
XLOC_003388|PGSC0003DMT400050589	PGSC0003DMB000000017:1067243-1080898	159066	151911	0	0	622283	145692	0	0	0	0	0	0	0	0	0	0
XLOC_003396|PGSC0003DMT400050646	PGSC0003DMB000000017:1328752-1329284	22928	377637	407582	372521	634672	363614	465016	356944	297306	561578	0	0	0	0	0	0
XLOC_003397|PGSC0003DMT400050647,PGSC0003DMT400050650	PGSC0003DMB000000017:1340117-1351273	170438	213406	132023	332348	292808	323491	137155	16846	135781	181738	0	0	0	0	0	0
XLOC_003403|-	PGSC0003DMB000000017:1435982-1442752	189009	160101	110398	244795	173776	191527	162022	133673	126045	163132	507842	406274	158302	107351	107567	102751
XLOC_003408|PGSC0003DMT400047735,PGSC0003DMT400047736	PGSC0003DMB000000017:1505612-1512293	172309	32574	0	0	11924	261899	10435	998505	0	0	0	0	0	0	259138	1943943
XLOC_003409|PGSC0003DMT400047737	PGSC0003DMB000000017:1514211-1517664	258124	243699	149128	864982	261244	340511	227459	260699	353535	179131	234,65	950736	181,89	202951	222545	184175
XLOC_003410|PGSC0003DMT400047738,PGSC0003DMT400047739	PGSC0003DMB000000017:1521900-1529248	504653	141669	199353	194983	0	0	0	0	0	0	0	0	0	0	0	0
XLOC_003412|PGSC0003DMT400047741	PGSC0003DMB000000017:1558286-1561385	0	0	0	0	564805	141209	0	0	0	0	0	0	0	0	0	0
XLOC_003413|PGSC0003DMT400047743	PGSC0003DMB000000017:1579444-1585242	238641	333121	1251627	433871	188745	287776	157048	135353	270406	609531	0	0	0	0	0	0
XLOC_003417|PGSC0003DMT400047759,PGSC0003DMT400047760,PGSC0003DMT400047762	PGSC0003DMB000000017:1707570-1721171	0	0	0	0	174931	587548	0	0	0	0	0	0	0	0	0	0
XLOC_003418|PGSC0003DMT400047763	PGSC0003DMB000000017:1735175-1738031	425978	356356	373928	153794	524042	25332	28469	279988	184111	412167	0	0	426886	318292	22513	250145
XLOC_003419|PGSC0003DMT400047764,PGSC0003DMT400047765,PGSC0003DMT400047766	PGSC0003DMB000000017:1738897-1744772	196182	144248	0	0	0	0	0	0	0	0	0	0	0	0	972551	30325
XLOC_003428|PGSC0003DMT400047787,PGSC0003DMT400047788,PGSC0003DMT400047789	PGSC0003DMB000000017:1817422-1829407	0	0	0	0	2511378	222401	0	0	0	0	0	0	0	0	0	0
XLOC_003444|PGSC0003DMT400048132	PGSC0003DMB000000017:2006977-2009390	612464	977436	378697	0	810828	460698	603395	422851	379825	173927	0	0	960734	600459	411668	422224
XLOC_003447|PGSC0003DMT400048135	PGSC0003DMB000000017:2028039-2033851	18129	154178	0	0	133822	731837	1681121	566657	0	0	0	0	0	0	0	0
XLOC_003449|PGSC0003DMT400048138,PGSC0003DMT400048139	PGSC0003DMB000000017:2037543-2047702	0	0	0	0	2433582	2759743	0	0	0	0	0	0	0	0	0	0
XLOC_003452|PGSC0003DMT400048157,PGSC0003DMT400048159,PGSC0003DMT400048160,PGSC0003DMT400048161	PGSC0003DMB000000017:2088526-2162710	254741	225371	401425	305415	631377	207847	156098	860004	962774	688318	0	0	0	0	0	0
XLOC_003454|-	PGSC0003DMB000000017:2088526-2162710	0	0	0	0	0	0	0	0	0	0	0	0	0	0	0	0
XLOC_003458|PGSC0003DMT400007791,PGSC0003DMT400007792,PGSC0003DMT400007793	PGSC0003DMB000000017:2252904-2276642	286001	28389	322791	258073	385604	326591	231715	156407	326084	330896	0	0	410378	422328	182481	33333
XLOC_003461|PGSC0003DMT400007784	PGSC0003DMB000000017:2291196-2295187	0	257868	135292	689991	0	595808	0,319359	163508	651338	497093	248114	0	0	0	466104	482697
XLOC_003463|PGSC0003DMT400007780	PGSC0003DMB000000017:2371070-2376211	0	0	0	0	0	0	825421	689029	0	0	0	0	0	0	0	0
XLOC_003465|PGSC0003DMT400007773,PGSC0003DMT400007775	PGSC0003DMB000000017:2387564-2390498	168292	890957	747916	328118	926658	327551	141237	137549	0	0	263771	0	0	0	0	0
XLOC_003466|PGSC0003DMT400007769,PGSC0003DMT400007770,PGSC0003DMT400007771,PGSC0003DMT400007772	PGSC0003DMB000000017:2391237-2395094	257979	198463	0	0	0	0	202924	186905	0	0	0	0	0	0	0	0
XLOC_003468|PGSC0003DMT400007765	PGSC0003DMB000000017:2410258-2420147	917501	110715	131817	329787	110,67	833575	767851	584116	704527	128056	25708	610565	624134	638734	384013	780216
XLOC_003469|PGSC0003DMT400007761,PGSC0003DMT400007762,PGSC0003DMT400007764	PGSC0003DMB000000017:2422512-2435830	321553	306811	42608	100988	414291	1747657	322059	146008	1991578	440753	584439	268685	185054	510176	733493	325712
XLOC_003471|PGSC0003DMT400007759	PGSC0003DMB000000017:2461468-2468646	159896	257984	0	0	0	0	100643	640099	0	0	0	0	0	0	0	0
XLOC_003473|PGSC0003DMT400070549	PGSC0003DMB000000017:2716899-2720031	0	0	0	0	0	0	0	0	0	0	0	0	0	0	0	0
XLOC_003475|PGSC0003DMT400070542,PGSC0003DMT400070543,PGSC0003DMT400070544	PGSC0003DMB000000017:2739979-2748325	0	0	0	0	978064	180935	585128	781502	0	0	0	0	0	0	0	0
XLOC_003476|PGSC0003DMT400070539,PGSC0003DMT400070540	PGSC0003DMB000000017:2810424-2815171	0	0	0	0	0	0	0	0	0	0	0	0	0	0	0	0
XLOC_003480|PGSC0003DMT400070532	PGSC0003DMB000000017:2918661-2923023	185875	349882	220282	342266	428768	437701	307653	318308	214243	370957	0	0	0	0	0	0
XLOC_003481|PGSC0003DMT400070503	PGSC0003DMB000000017:2968717-3063458	221667	32557	595884	692595	337244	325917	240399	291725	550364	618841	407421	140999	290452	316506	342108	542037
XLOC_003482|-	PGSC0003DMB000000017:2968717-3063458	853432	724627	117297	847844	759483	107758	472648	725987	912382	130344	593401	231707	450099	487063	708851	493702
XLOC_003487|PGSC0003DMT400070488	PGSC0003DMB000000017:3079696-3082574	1577818	237589	0	0	0	0	247165	2191396	0	0	0	0	0	0	0	0
XLOC_003488|PGSC0003DMT400070485,PGSC0003DMT400070486,PGSC0003DMT400070487	PGSC0003DMB000000017:3141022-3156389	0	0	0	0	0	0	0	0	0	0	0	0	0	0	0	0
XLOC_003490|PGSC0003DMT400020857,PGSC0003DMT400020858	PGSC0003DMB000000017:25272-32682	73153	838642	328561	205622	769501	814473	689282	35869	273509	631435	0	0	464126	452553	292639	776072
XLOC_003492|PGSC0003DMT400020849,PGSC0003DMT400020852,PGSC0003DMT400020853	PGSC0003DMB000000017:71601-75531	202469	185184	560938	371244	258136	250695	0	0	227896	290104	0	0	0	0	205701	235092
XLOC_003496|PGSC0003DMT400020843,PGSC0003DMT400020845	PGSC0003DMB000000017:128523-132977	85737	115063	526854	804849	123,06	110,79	946059	939275	864693	950603	345073	517609	716037	786567	704892	772024
XLOC_003497|PGSC0003DMT400020840,PGSC0003DMT400020841,PGSC0003DMT400020842	PGSC0003DMB000000017:141208-164059	614546	137305	0	0	0	0	0	0	0	0	0	0	0	0	0	0
XLOC_003498|PGSC0003DMT400020838,PGSC0003DMT400020839	PGSC0003DMB000000017:184829-193998	225417	34033	279771	367664	333809	176341	145796	22565	132192	376153	0	0	0	0	0	0
XLOC_003501|PGSC0003DMT400020831,PGSC0003DMT400020832	PGSC0003DMB000000017:257429-261602	0	0	0	0	149741	935885	259416	721852	0	0	0	0	0	0	238939	0
XLOC_003503|PGSC0003DMT400020828,PGSC0003DMT400020829	PGSC0003DMB000000017:281427-287430	42582	309676	788965	950443	1963820	647638	166881	255393	424471	101467	280497	311663	280241	2226825	32043	157645
XLOC_003504|PGSC0003DMT400020827	PGSC0003DMB000000017:311484-313776	526913	26623	70,99	432555	905838	249489	400312	310851	136649	105963	278182	354683	300163	513437	204469	351775
XLOC_003506|PGSC0003DMT400020825	PGSC0003DMB000000017:421559-425681	340866	311967	618572	275381	54301	243152	349334	225759	221791	77,23	0	0	912427	440818	929288	443605
XLOC_003507|PGSC0003DMT400020822,PGSC0003DMT400020823	PGSC0003DMB000000017:447192-448282	0	0	181006	0	0	0	0	0	2390118	94,77	0	0	0	0	0	290607
XLOC_003509|PGSC0003DMT400020812,PGSC0003DMT400020816	PGSC0003DMB000000017:663481-675395	318537	374373	258423	196594	293397	340859	213397	139051	235743	28567	0	0	0	0	0	0
XLOC_003510|PGSC0003DMT400020801,PGSC0003DMT400020802,PGSC0003DMT400020806,PGSC0003DMT400020807	PGSC0003DMB000000017:687029-693978	0	0	0	0	192582	709967	903173	764955	0	0	0	0	0	0	0	0
XLOC_003511|PGSC0003DMT400020799,PGSC0003DMT400020800	PGSC0003DMB000000017:708718-715770	0	0	0	0	0	0	0	0	0	0	0	0	0	0	0	0
XLOC_003512|PGSC0003DMT400020798	PGSC0003DMB000000017:737119-737952	0	0	0	0	0	0	0	0	0	0	0	0	0	0	0	0
XLOC_003513|PGSC0003DMT400020796,PGSC0003DMT400020797	PGSC0003DMB000000017:769174-774449	324028	228726	249605	157939	583014	434458	42,83	317803	210083	343913	0	0	219197	442239	385331	312557
XLOC_003514|PGSC0003DMT400020794,PGSC0003DMT400020795	PGSC0003DMB000000017:784018-791715	370062	264299	335506	111115	570262	375275	266216	234454	248677	447357	0	0	288294	520026	0	0
XLOC_003515|PGSC0003DMT400020793	PGSC0003DMB000000017:793762-798287	389418	763564	0	0	838406	430432	39944	404165	364691	141305	0	0	390269	564863	0	0
XLOC_003521|PGSC0003DMT400050662	PGSC0003DMB000000017:1051818-1057748	299701	221026	482407	148262	185733	321163	215857	24652	220412	430942	0	0	342944	180497	0	0
XLOC_003522|PGSC0003DMT400050663,PGSC0003DMT400050664	PGSC0003DMB000000017:1067243-1080898	0	0	50843	468037	0	0	0	0	0	0	387317	107575	0	0	0	0
XLOC_003523|PGSC0003DMT400050665,PGSC0003DMT400050666	PGSC0003DMB000000017:1082111-1088925	179165	1275337	0	0	762597	180814	1198544	418388	174242	146277	0	0	0	0	0	0
XLOC_003528|PGSC0003DMT400050678	PGSC0003DMB000000017:1365390-1371577	820779	254686	564144	578609	805568	291618	153161	173636	275633	338984	265936	0	141319	361634	174877	564781
XLOC_003530|PGSC0003DMT400065589,PGSC0003DMT400065590	PGSC0003DMB000000017:1427697-1431878	0	0	0	0	0	0	743397	330521	0	0	0	0	0	0	0	0
XLOC_003531|PGSC0003DMT400065586	PGSC0003DMB000000017:1444733-1454559	253318	337757	0	0	1719898	170433	206689	197183	191611	195328	0	0	0	0	0	0
XLOC_003536|PGSC0003DMT400047800,PGSC0003DMT400047801,PGSC0003DMT400047803	PGSC0003DMB000000017:1563741-1571008	208847	164472	0	0	203416	163494	999924	916823	15202	274286	0	0	0	0	0	0
XLOC_003539|PGSC0003DMT400047810	PGSC0003DMB000000017:1613186-1617469	237585	206408	0	0	227652	142282	19939	15364	0	0	0	0	164841	368724	0	0
XLOC_003541|PGSC0003DMT400047813	PGSC0003DMB000000017:1660529-1666608	0	0	0	0	0	0	0	0	0	0	0	0	0	0	0	0
XLOC_003542|PGSC0003DMT400047815	PGSC0003DMB000000017:1673412-1679061	32964	349031	19533	106045	638736	51327	366557	400285	448815	376783	45466	619991	445987	430338	470406	418138
XLOC_003543|-	PGSC0003DMB000000017:1679853-1697790	0	0	0	0	0	0	140055	785194	0	0	0	0	0	0	0	0
XLOC_003547|PGSC0003DMT400047832,PGSC0003DMT400047833	PGSC0003DMB000000017:1745160-1750521	0	0	0	0	0	0	0	0	0	0	0	0	0	0	0	0
XLOC_003550|PGSC0003DMT400047834,PGSC0003DMT400047835,PGSC0003DMT400047836,PGSC0003DMT400047837	PGSC0003DMB000000017:1811854-1814714	222014	164664	350518	378983	403586	269057	200152	272375	214263	281821	0	0	0	0	0	0
XLOC_003556|PGSC0003DMT400048179	PGSC0003DMB000000017:1955166-1959603	0	0	0	0	0	0	0	0	0	0	0	0	0	0	0	0
XLOC_003565|PGSC0003DMT400097185	PGSC0003DMB000000017:2213403-2215332	118893	130677	176,13	104463	106329	136862	121687	847119	109,27	191395	539203	114971	932388	949907	559076	193,5
XLOC_003566|PGSC0003DMT400007746	PGSC0003DMB000000017:2224606-2236213	0	0	0	0	623938	136487	0	0	0	0	0	0	0	0	0	0
XLOC_003567|PGSC0003DMT400007738,PGSC0003DMT400007739,PGSC0003DMT400007740,PGSC0003DMT400007741,PGSC0003DMT400007742,PGSC0003DMT400007743	PGSC0003DMB000000017:2245728-2250595	309945	170047	278753	676400	272371	219054	180783	14255	163911	393055	0	0	0	0	0	0
XLOC_003568|PGSC0003DMT400090967	PGSC0003DMB000000017:2291196-2295187	903318	140,28	535265	590	625121	480562	2193342	143442	497815	737504	237856	0	101845	536029	290039	286458
XLOC_003569|PGSC0003DMT400096032	PGSC0003DMB000000017:2298064-2298616	358162	111241	848921	356136	495716	443046	150292	736017	334387	584834	170654	0	0	0	259813	613548
XLOC_003570|PGSC0003DMT400007736,PGSC0003DMT400007737	PGSC0003DMB000000017:2301178-2304305	0	705356	220455	105509	0	941979	0	162082	966671	303768	508175	0	395514	0	535684	187517
XLOC_003571|PGSC0003DMT400007735	PGSC0003DMB000000017:2308887-2312752	0	0	0	0	478692	217587	0	0	0	0	220776	118273	0	0	0	0
XLOC_003572|PGSC0003DMT400007734	PGSC0003DMB000000017:2316123-2317185	0	0	0	0	0	0	982823	19304	0	0	0	0	0	0	0	0
XLOC_003573|PGSC0003DMT400007733	PGSC0003DMB000000017:2321823-2325690	218412	585858	0	0	151147	302294	31161	510038	254893	53496	0	0	0	0	0	0
XLOC_003574|PGSC0003DMT400007732	PGSC0003DMB000000017:2326432-2330687	0	0	0	0	322823	144117	1438661	14784	0	0	0	0	0	0	0	0
XLOC_003576|PGSC0003DMT400007728,PGSC0003DMT400007729,PGSC0003DMT400007730	PGSC0003DMB000000017:2353835-2357339	870212	785159	168458	189803	109572	516154	649173	354089	539679	212732	252,54	130282	351447	871165	0	0
XLOC_003579|PGSC0003DMT400007723	PGSC0003DMB000000017:2437352-2445169	168887	223527	0	0	730467	237402	168312	226773	0	0	0	0	0	0	0	0
XLOC_003580|PGSC0003DMT400007721,PGSC0003DMT400007722	PGSC0003DMB000000017:2469661-2474609	0	0	0	0	0	0	0	0	0	0	0	0	0	0	0	0
XLOC_003588|PGSC0003DMT400070475,PGSC0003DMT400070478	PGSC0003DMB000000017:2675248-2685321	336764	41699	0	0	0	0	1066053	406192	0	0	0	0	0	0	0	0
XLOC_003591|PGSC0003DMT400070470	PGSC0003DMB000000017:2701851-2705970	0	0	0	0	0	0	0	0	0	0	0	0	0	0	0	0
XLOC_003592|PGSC0003DMT400070468,PGSC0003DMT400070469	PGSC0003DMB000000017:2720921-2729877	121303	311525	2190209	256805	205199	189148	165811	136421	180842	290984	0	0	0	0	0	0
XLOC_003594|PGSC0003DMT400070463,PGSC0003DMT400070464,PGSC0003DMT400070465	PGSC0003DMB000000017:2759279-2761147	360741	375558	623095	387528	30607	170027	626592	354257	271881	0	0	0	0	0	263764	310614
XLOC_003596|PGSC0003DMT400070461	PGSC0003DMB000000017:2772966-2773637	391222	736418	0	0	216589	451228	7661	219261	0	0	0	0	0	0	0	0
XLOC_003598|PGSC0003DMT400070453,PGSC0003DMT400070454,PGSC0003DMT400070455,PGSC0003DMT400070456,PGSC0003DMT400070457,PGSC0003DMT400070458,PGSC0003DMT400070459	PGSC0003DMB000000017:2779106-2786598	100762	753608	179253	369323	149,93	126174	518565	816723	829181	165405	0	0	192221	795501	617724	283815
XLOC_003600|PGSC0003DMT400070450	PGSC0003DMB000000017:2796509-2801183	0	0	0	0	0	0	0	0	0	0	0	0	0	0	0	0
XLOC_003601|PGSC0003DMT400070448,PGSC0003DMT400070449	PGSC0003DMB000000017:2842408-2848972	371795	241924	169466	334562	197916	28018	152547	186783	222509	140097	0	0	0	0	226734	181386
XLOC_003602|PGSC0003DMT400070447	PGSC0003DMB000000017:2849097-2852748	586158	525441	617873	376046	596464	525295	596255	530,63	392734	804574	113363	105805	441712	432,77	336879	453,95
XLOC_003606|PGSC0003DMT400070437,PGSC0003DMT400070438,PGSC0003DMT400070439	PGSC0003DMB000000017:2893544-2898278	827483	950142	345806	627938	570176	645244	594068	497745	675248	579034	0	0	38176	487816	544128	776938
XLOC_003608|PGSC0003DMT400070434	PGSC0003DMB000000017:2909719-2913217	492586	586757	218913	330135	511325	53263	38756	618282	399209	377031	0	0	624792	347107	274584	292889
XLOC_003609|PGSC0003DMT400070433	PGSC0003DMB000000017:2914002-2917757	0	0	0	0	0	0	197715	136589	0	0	0	0	0	0	0	0
XLOC_003611|PGSC0003DMT400070430	PGSC0003DMB000000017:2931020-2936799	144681	889668	0	0	0	0	0	0	0	0	0	0	0	0	0	0
XLOC_003612|PGSC0003DMT400070429	PGSC0003DMB000000017:2938635-2945629	0	0	0	0	0	0	0	0	0	0	0	0	0	0	0	0
XLOC_003618|PGSC0003DMT400070416,PGSC0003DMT400070418	PGSC0003DMB000000017:3082701-3097951	0	0	0	0	0	0	917073	779734	0	0	0	0	0	0	0	0
XLOC_003619|PGSC0003DMT400070408,PGSC0003DMT400070409,PGSC0003DMT400070410,PGSC0003DMT400070411	PGSC0003DMB000000017:3116466-3121141	255091	217258	18178	298862	281385	21343	938216	717416	249519	867241	0	0	0	0	0	0
XLOC_003620|PGSC0003DMT400070407	PGSC0003DMB000000017:3125603-3130919	994509	893463	232149	64633	81336	716904	66391	619303	644788	541303	188938	358982	129116	715323	573411	716764
XLOC_003621|PGSC0003DMT400070406	PGSC0003DMB000000017:3131757-3136298	2644996	142058	0	0	0	0	157691	750786	0	0	0	0	0	0	0	0
XLOC_003622|PGSC0003DMT400070405	PGSC0003DMB000000017:3165493-3167763	0	0	0	0	0	0	0	0	0	0	0	0	0	0	0	0
XLOC_003632|-	PGSC0003DMB000000017:750302-750698	350385	197864	0	0	0	0	382273	327289	0	0	0	0	0	0	0	0
XLOC_003633|-	PGSC0003DMB000000017:2088526-2162710	0	0	0	0	238972	0	0	0	0	375904	0	0	0	0	0	0
XLOC_003636|PGSC0003DMT400027418,PGSC0003DMT400027420	PGSC0003DMB000000018:98381-105945	858230	349304	463464	206743	143844	593184	216865	990491	907353	229078	0	0	0	0	832446	562105
XLOC_003637|-	PGSC0003DMB000000018:109378-130596	741194	90068	405993	827727	598054	858303	755771	754739	641469	79829	378709	2119473	524999	788524	641917	477719
XLOC_003638|PGSC0003DMT400027412	PGSC0003DMB000000018:143322-145376	0	0	0	0	0	0	289477	1295060	365946	256012	330271	133681	565662	312603	0	0
XLOC_003640|PGSC0003DMT400027410,PGSC0003DMT400027411	PGSC0003DMB000000018:230683-234313	0	0	0	0	692351	259192	263041	778769	22761	0	0	0	0	0	0	0
XLOC_003641|PGSC0003DMT400027409	PGSC0003DMB000000018:290746-303823	139542	221731	0	0	153977	201852	2883135	1620186	214973	146039	0	0	0	0	0	0
XLOC_003645|PGSC0003DMT400010594	PGSC0003DMB000000018:585436-589518	0	0	0	0	0	0	0	0	0	0	0	0	0	0	0	0
XLOC_003651|PGSC0003DMT400010601,PGSC0003DMT400010602	PGSC0003DMB000000018:927603-930778	0	0	0	0	0	0	0	0	860821	269737	0	0	0	0	0	0
XLOC_003655|-	PGSC0003DMB000000018:1112769-1134159	0	0	0	0	0	0	0	0	0	0	0	0	0	0	0	0
XLOC_003658|PGSC0003DMT400073904,PGSC0003DMT400073905	PGSC0003DMB000000018:1387692-1399469	110494	171097	1615742	348993	512213	258198	146039	1309336	740512	251627	0	0	0	0	0	0
XLOC_003662|PGSC0003DMT400073876	PGSC0003DMB000000018:1844543-1851280	0	0	0	0	0	0	0	0	0	0	0	0	0	0	0	0
XLOC_003664|-	PGSC0003DMB000000018:2100505-2110250	0	0	0	0	0	0	0	0	0	0	0	0	0	0	0	0
XLOC_003666|-	PGSC0003DMB000000018:2209296-2222620	0	0	0	0	0	0	0	0	0	0	0	0	0	0	0	0
XLOC_003667|-	PGSC0003DMB000000018:2222747-2229095	0	0	0	0	0	0	0	0	0	0	0	0	0	0	0	0
XLOC_003668|PGSC0003DMT400039081,PGSC0003DMT400039082,PGSC0003DMT400039083	PGSC0003DMB000000018:2311659-2338240	0	0	0	0	0	0	0	0	0	0	0	0	0	0	0	0
XLOC_003676|PGSC0003DMT400054125,PGSC0003DMT400054126,PGSC0003DMT400054127,PGSC0003DMT400054128	PGSC0003DMB000000018:2597969-2601078	0	0	0	0	0	0	0	0	0	0	0	0	0	0	0	0
XLOC_003682|-	PGSC0003DMB000000018:2717838-2720620	0	0	0	0	0	0	0	0	0	0	0	0	0	0	0	0
XLOC_003683|PGSC0003DMT400027752	PGSC0003DMB000000018:2727984-2731530	869988	189816	0	0	175144	221832	159363	137105	18461	245373	0	0	0	0	246129	10958
XLOC_003684|PGSC0003DMT400027759,PGSC0003DMT400027760	PGSC0003DMB000000018:2789996-2794824	204578	2664354	0	0	283695	287192	476493	13062	0	0	0	0	0	0	0	0
XLOC_003686|PGSC0003DMT400031289	PGSC0003DMB000000018:2898041-2905928	0	0	0	0	0	0	0	0	0	0	0	0	0	0	0	0
XLOC_003691|PGSC0003DMT400059515,PGSC0003DMT400059517	PGSC0003DMB000000018:3075708-3092931	157682	221683	620313	204107	240824	309747	195726	303128	248961	222224	0	0	0	0	0	0
XLOC_003697|-	PGSC0003DMB000000018:333890-347247	0	0	0	0	0	0	415177	277258	0	0	0	0	0	0	0	0
XLOC_003708|PGSC0003DMT400010608	PGSC0003DMB000000018:707302-729864	1506932	186844	150332	422254	152819	327971	2607802	157643	0	0	0	0	0	0	0	0
XLOC_003712|-	PGSC0003DMB000000018:806115-811391	0	0	0	0	335125	837812	9102	603125	0	0	0	0	727985	316099	575883	358327
XLOC_003714|-	PGSC0003DMB000000018:930998-991684	154739	836784	327745	281726	149317	237148	952003	997928	186446	215485	240481	916639	0	0	0	0
XLOC_003718|-	PGSC0003DMB000000018:1273410-1294945	167574	199361	0	0	21979	167847	173797	222248	22873	11521	0	0	0	0	324864	279664
XLOC_003724|PGSC0003DMT400073882,PGSC0003DMT400073883	PGSC0003DMB000000018:1728658-1742702	223926	379234	222844	228131	904691	475349	26049	333129	95919	281749	0	0	834888	534752	208897	880249
XLOC_003725|PGSC0003DMT400073881	PGSC0003DMB000000018:1750090-1756755	0	0	0	0	159139	143667	144744	179002	0	0	0	0	0	0	0	0
XLOC_003728|PGSC0003DMT400073876	PGSC0003DMB000000018:1844543-1851280	0	0	0	0	0	0	0	0	0	0	0	0	0	0	0	0
XLOC_003729|PGSC0003DMT400073875	PGSC0003DMB000000018:1877160-1925885	279275	386048	180406	795409	415523	333505	288294	274093	137537	260927	0	0	300143	416502	253857	61595
XLOC_003731|-	PGSC0003DMB000000018:2039378-2048409	0	0	0	0	16683	199849	0	0	390751	213225	0	0	0	0	0	0
XLOC_003734|PGSC0003DMT400073861	PGSC0003DMB000000018:2159229-2167865	0	0	0	0	0	0	0	0	0	0	0	0	0	0	0	0
XLOC_003737|PGSC0003DMT400011483,PGSC0003DMT400011484	PGSC0003DMB000000018:2350521-2355235	0	0	0	0	0	0	0	0	0	0	0	0	0	0	0	0
XLOC_003738|-	PGSC0003DMB000000018:2359134-2362960	0	0	0	0	0	0	0	0	0	0	0	0	0	0	0	0
XLOC_003746|PGSC0003DMT400027774	PGSC0003DMB000000018:2794950-2797371	0	0	0	0	0	0	0	0	0	0	0	0	0	0	0	0
XLOC_003754|PGSC0003DMT400059504,PGSC0003DMT400059505,PGSC0003DMT400059506	PGSC0003DMB000000018:3135969-3145595	414396	409371	0	0	402624	334131	349585	234248	339999	266272	0	0	314041	27551	0	0
XLOC_003758|PGSC0003DMT400065068,PGSC0003DMT400065069,PGSC0003DMT400065070	PGSC0003DMB000000019:230920-234152	0	0	0	0	218509	273471	1448523	176979	0	0	0	0	0	0	0	0
XLOC_003760|PGSC0003DMT400065067	PGSC0003DMB000000019:332617-333462	0	0	0	0	0	0	0	0	0	0	0	0	0	0	0	0
XLOC_003761|PGSC0003DMT400065063	PGSC0003DMB000000019:382422-384137	738639	71,45	875367	1744674	889795	709942	763388	421636	496632	871076	0	0	431814	551943	374126	347015
XLOC_003777|-	PGSC0003DMB000000019:1108603-1145766	364231	209123	336094	193868	14042	39877	270941	247815	150505	168014	20935	399511	0	0	154164	430958
XLOC_003790|-	PGSC0003DMB000000019:1935321-1949782	239705	796197	334113	274911	252679	22	344477	198924	182741	183508	367846	530296	0	0	251535	2519019
XLOC_003794|PGSC0003DMT400074574,PGSC0003DMT400074575	PGSC0003DMB000000019:2018475-2027995	624571	13856	0	0	0	0	599044	100012	0	0	0	0	0	0	0	0
XLOC_003796|-	PGSC0003DMB000000019:2169111-2186701	603295	514568	243514	359537	193614	979445	380995	46426	567434	135782	318534	44995	319624	923670	538734	189937
XLOC_003797|PGSC0003DMT400074577,PGSC0003DMT400074578	PGSC0003DMB000000019:2242270-2245092	0	0	0	0	2701975	136622	497054	737636	0	0	0	0	0	0	0	0
XLOC_003799|PGSC0003DMT400088484	PGSC0003DMB000000019:2411135-2439132	0	0	0	23859	0	0	0	0	0	0	0	0	0	0	0	0
XLOC_003808|-	PGSC0003DMB000000019:2816266-2822336	2015318	225084	0	0	251295	285564	145454	169603	428061	350376	0	0	372193	313428	0	0
XLOC_003810|PGSC0003DMT400025330,PGSC0003DMT400025331	PGSC0003DMB000000019:2869305-2873047	0	0	0	0	166754	1663011	2336490	735765	0	0	0	0	0	0	0	0
XLOC_003811|-	PGSC0003DMB000000019:2889490-2894722	0	0	0	0	0	0	0	0	0	0	0	0	0	0	0	0
XLOC_003812|PGSC0003DMT400062680	PGSC0003DMB000000019:3078349-3087252	417651	367308	210967	307028	473814	544886	307414	338958	435029	268317	0	0	370532	381908	268689	238834
XLOC_003823|PGSC0003DMT400065040,PGSC0003DMT400065041,PGSC0003DMT400065042	PGSC0003DMB000000019:346323-354010	0	0	0	0	0	0	851172	132949	0	0	0	0	0	0	0	0
XLOC_003827|PGSC0003DMT400059644,PGSC0003DMT400059645	PGSC0003DMB000000019:760359-762775	600395	408834	847267	705768	175354	172223	42413	177517	176021	72044	0	0	570824	751814	295091	890191
XLOC_003834|PGSC0003DMT400048918,PGSC0003DMT400048920	PGSC0003DMB000000019:1396051-1403166	0	0	0	0	0	0	0	0	0	0	0	0	0	0	0	0
XLOC_003836|-	PGSC0003DMB000000019:1607201-1617107	302418	100457	0	0	984854	192354	952097	995622	0	0	0	0	0	0	0	0
XLOC_003839|PGSC0003DMT400031398,PGSC0003DMT400031399,PGSC0003DMT400031400,PGSC0003DMT400031401,PGSC0003DMT400031402	PGSC0003DMB000000019:1686409-1689495	0	0	0	0	355421	224799	841645	20338	981678	275248	0	0	634142	295913	0	0
XLOC_003843|PGSC0003DMT400011472	PGSC0003DMB000000019:1769603-1769915	831478	978209	328464	810564	115081	179814	116301	129445	161726	452567	0	0	124994	131573	988785	43946
XLOC_003844|-	PGSC0003DMB000000019:1788643-1816584	0	0	0	0	834981	2198365	0	0	1192853	192186	0	0	0	0	0	0
XLOC_003852|-	PGSC0003DMB000000019:2169111-2186701	233738	325494	0	0	0	0	0	0	280476	198587	0	0	0	0	0	0
XLOC_003853|-	PGSC0003DMB000000019:2294479-2333005	168212	169142	0	0	0	0	0	0	0	0	0	0	0	0	0	0
XLOC_003855|PGSC0003DMT400088484	PGSC0003DMB000000019:2411135-2439132	16918	313753	253946	288497	284417	314549	304941	202407	757961	295859	157585	213759	256434	324126	1955784	429639
XLOC_003860|PGSC0003DMT400033506,PGSC0003DMT400033508,PGSC0003DMT400033512	PGSC0003DMB000000019:2559893-2587708	275119	18,92	166918	212484	370859	222928	1885657	169415	200141	230619	323169	215039	243179	272644	0	0
XLOC_003863|PGSC0003DMT400033517	PGSC0003DMB000000019:2671867-2677470	316701	316997	0	0	200559	269774	327299	254016	234731	444215	0	0	326615	322304	236964	2541391
XLOC_003864|PGSC0003DMT400033518	PGSC0003DMB000000019:2704181-2709348	214977	346853	0	0	29754	265661	206191	143433	199114	300883	0	0	0	0	0	0
XLOC_003869|-	PGSC0003DMB000000019:3030094-3036060	0	0	0	0	0	0	0	0	0	0	0	0	0	0	0	0
XLOC_003870|PGSC0003DMT400062668	PGSC0003DMB000000019:3090061-3095859	126,73	200757	131852	196806	182,54	189933	175921	140,4	169108	162,42	739088	951724	119623	191539	191888	142529
XLOC_003876|PGSC0003DMT400038588	PGSC0003DMB000000020:23989-28056	187589	2329366	276207	332491	165221	152436	140734	637176	0	0	0	0	0	0	0	0
XLOC_003879|PGSC0003DMT400091865	PGSC0003DMB000000020:93776-100130	0	0	0	0	0	0	0	0	0	0	0	0	0	0	0	0
XLOC_003880|PGSC0003DMT400038577,PGSC0003DMT400038579,PGSC0003DMT400038580,PGSC0003DMT400038581,PGSC0003DMT400038582	PGSC0003DMB000000020:119785-125026	199651	163038	0	0	0	0	0	0	0	0	0	0	0	0	0	0
XLOC_003881|PGSC0003DMT400038576	PGSC0003DMB000000020:131405-138399	928088	841681	615395	877919	119987	947084	64593	552089	670288	75325	567104	451107	651431	98815	627611	581841
XLOC_003883|PGSC0003DMT400038573,PGSC0003DMT400038574	PGSC0003DMB000000020:151400-154509	17013	435335	0	0	588659	188561	513108	243342	234397	347227	0	0	0	0	0	0
XLOC_003884|PGSC0003DMT400038568,PGSC0003DMT400038570,PGSC0003DMT400038571	PGSC0003DMB000000020:160810-167974	220564	11457	776797	133379	0	0	857758	478773	0	0	810629	402458	0	0	0	0
XLOC_003886|PGSC0003DMT400008992,PGSC0003DMT400008993,PGSC0003DMT400008994,PGSC0003DMT400008995,PGSC0003DMT400008997,PGSC0003DMT400008998,PGSC0003DMT400008999,PGSC0003DMT400009000,PGSC0003DMT400009001	PGSC0003DMB000000020:182952-188642	0	0	0	251973	0	0	0	0	0	0	0	0	0	0	34426	0
XLOC_003887|PGSC0003DMT400009003	PGSC0003DMB000000020:189446-192814	484827	301163	275795	415917	402617	587149	325509	362295	251469	221666	0	0	262379	460314	0	0
XLOC_003889|PGSC0003DMT400009006,PGSC0003DMT400009007,PGSC0003DMT400009011,PGSC0003DMT400009014	PGSC0003DMB000000020:198586-209278	0	0	0	0	157629	327911	0	0	0	0	0	0	0	0	0	0
XLOC_003894|PGSC0003DMT400009034,PGSC0003DMT400009035,PGSC0003DMT400009036,PGSC0003DMT400009037,PGSC0003DMT400009038	PGSC0003DMB000000020:333176-338815	147126	514255	0	0	0	0	0	0	0	0	0	0	0	0	0	0
XLOC_003896|PGSC0003DMT400009043	PGSC0003DMB000000020:360480-364879	0	0	592602	214484	830516	233581	629479	747328	181557	326602	0	0	0	0	249757	351273
XLOC_003897|PGSC0003DMT400009045,PGSC0003DMT400009046	PGSC0003DMB000000020:380740-384173	110937	105205	499712	586755	144793	818179	853765	56222	619802	967295	269412	287505	904815	714327	800977	772574
XLOC_003898|PGSC0003DMT400009047	PGSC0003DMB000000020:388496-394371	279136	271187	237657	340464	290034	339883	223278	220208	169829	242374	0	0	275356	196518	0	0
XLOC_003901|PGSC0003DMT400009050	PGSC0003DMB000000020:410943-414286	0	0	0	0	0	0	0	0	0	0	0	0	0	0	0	0
XLOC_003902|PGSC0003DMT400009051	PGSC0003DMB000000020:429599-430284	0	0	0	0	0	0	0	0	0	0	0	0	0	0	0	0
XLOC_003904|PGSC0003DMT400009053,PGSC0003DMT400009054	PGSC0003DMB000000020:435174-439676	141597	782656	0	0	449837	691779	672402	190502	156629	264378	0	0	0	0	0	0
XLOC_003905|PGSC0003DMT400009055,PGSC0003DMT400009056	PGSC0003DMB000000020:446650-450294	196635	888326	0	0	261267	340192	2598580	808162	0	0	0	0	0	0	0	0
XLOC_003906|PGSC0003DMT400009057	PGSC0003DMB000000020:457150-458682	0	0	0	0	267919	176262	0	0	0	0	0	0	0	0	0	0
XLOC_003910|PGSC0003DMT400009060	PGSC0003DMB000000020:528004-533347	303016	418281	111722	603918	288914	378617	276908	207565	27941	351849	0	0	0	0	320306	427454
XLOC_003912|PGSC0003DMT400009063	PGSC0003DMB000000020:563799-566089	0	0	0	0	0	0	0	0	0	0	0	0	0	0	0	0
XLOC_003913|PGSC0003DMT400009064,PGSC0003DMT400009065	PGSC0003DMB000000020:566509-570279	509628	137899	0	0	0	0	0	0	0	0	0	0	0	0	0	0
XLOC_003914|PGSC0003DMT400009066,PGSC0003DMT400009067	PGSC0003DMB000000020:580711-584512	778797	164917	0	0	100088	134733	840312	883319	0	0	0	0	0	0	0	0
XLOC_003916|PGSC0003DMT400009069	PGSC0003DMB000000020:606649-607798	101168	683078	0	0	872601	142051	228872	178042	988634	143648	735374	121337	119022	626431	784617	929917
XLOC_003917|PGSC0003DMT400009070	PGSC0003DMB000000020:610059-611013	182174	20575	0	0	0	0	0	0	0	0	0	0	0	0	0	0
XLOC_003918|PGSC0003DMT400090614	PGSC0003DMB000000020:639996-672081	0	0	0	0	0	0	0	0	0	0	0	0	0	0	0	0
XLOC_003920|PGSC0003DMT400009091,PGSC0003DMT400009092	PGSC0003DMB000000020:672761-680622	0	0	0	0	0	0	0	0	0	0	0	0	0	0	0	0
XLOC_003921|PGSC0003DMT400009093	PGSC0003DMB000000020:694945-700055	0	0	0	0	0	0	0	0	0	0	0	0	0	0	0	0
XLOC_003922|PGSC0003DMT400009094,PGSC0003DMT400009095	PGSC0003DMB000000020:703135-709351	324403	468668	0	0	209802	338019	259876	488963	17211	337088	158954	302829	80016	14	450504	210424
XLOC_003923|PGSC0003DMT400009096	PGSC0003DMB000000020:731040-739583	0	0	0	0	0	0	867323	611383	0	0	0	0	0	0	0	0
XLOC_003924|PGSC0003DMT400009101	PGSC0003DMB000000020:742395-757693	150018	247694	0	0	195667	170811	162624	187761	758832	199319	0	0	0	0	0	0
XLOC_003925|PGSC0003DMT400009104	PGSC0003DMB000000020:759250-767086	467681	666993	559908	269829	548221	44997	49863	338784	309408	646778	131644	317142	301309	436106	170254	423742
XLOC_003927|PGSC0003DMT400009111,PGSC0003DMT400009112	PGSC0003DMB000000020:831990-836060	144944	205748	27275	677831	178914	204233	678496	42595	189935	301733	0	0	271884	57619	1213246	278502
XLOC_003928|-	PGSC0003DMB000000020:837483-851180	0	0	0	0	0	0	0	0	0	0	0	0	0	0	0	0
XLOC_003931|PGSC0003DMT400009117,PGSC0003DMT400009118,PGSC0003DMT400009119,PGSC0003DMT400009120	PGSC0003DMB000000020:871777-873453	0	0	0	0	0	153106	0	0	0	0	0	0	0	0	0	0
XLOC_003932|PGSC0003DMT400009121,PGSC0003DMT400009122	PGSC0003DMB000000020:908096-912101	0	0	0	0	0	0	0	0	0	0	0	0	0	0	0	0
XLOC_003933|PGSC0003DMT400009123,PGSC0003DMT400009124,PGSC0003DMT400009125	PGSC0003DMB000000020:955507-970451	570484	601347	332189	100904	460039	615942	308351	368281	553725	392137	268747	418745	502031	306439	516894	218464
XLOC_003934|PGSC0003DMT400009126,PGSC0003DMT400009127	PGSC0003DMB000000020:982183-984528	0	0	0	0	0	0	0	0	0	0	0	0	0	0	0	0
XLOC_003939|PGSC0003DMT400009137,PGSC0003DMT400009138	PGSC0003DMB000000020:1099477-1107895	315952	446052	437104	283532	533997	464743	470795	292571	545812	744644	17607	22433	252238	444409	236566	296869
XLOC_003940|PGSC0003DMT400009139,PGSC0003DMT400009140	PGSC0003DMB000000020:1110412-1117809	148603	149849	0	0	0	0	400858	2584763	0	0	0	0	0	0	0	0
XLOC_003945|PGSC0003DMT400009154	PGSC0003DMB000000020:1183695-1188638	284391	401493	363997	266148	299146	265689	410516	361277	280264	29,72	855819	256746	0	0	0	0
XLOC_003946|PGSC0003DMT400009155,PGSC0003DMT400009156	PGSC0003DMB000000020:1220143-1225265	1108847	144309	0	0	139327	174574	1777211	143221	17673	741829	0	0	0	0	0	0
XLOC_003948|-	PGSC0003DMB000000020:1290129-1291055	0	0	0	0	0	0	0	0	0	0	0	0	0	0	0	0
XLOC_003949|PGSC0003DMT400009171,PGSC0003DMT400009200	PGSC0003DMB000000020:1294183-1418645	0	0	238655	696639	357879	280299	770556	798835	0	0	0	0	0	0	0	0
XLOC_003950|PGSC0003DMT400009174,PGSC0003DMT400009175,PGSC0003DMT400009176	PGSC0003DMB000000020:1294183-1418645	0	0	0	0	630968	499969	0	0	0	0	0	0	0	0	0	0
XLOC_003951|PGSC0003DMT400009177,PGSC0003DMT400009178,PGSC0003DMT400009180,PGSC0003DMT400009188	PGSC0003DMB000000020:1294183-1418645	0	0	0	0	0	0	767622	169114	0	0	0	0	0	0	0	0
XLOC_003952|PGSC0003DMT400009189	PGSC0003DMB000000020:1294183-1418645	155879	38011	167939	107752	588393	330971	1379948	383864	257252	925564	0	0	70299	504535	286479	0
XLOC_003954|PGSC0003DMT400009190	PGSC0003DMB000000020:1294183-1418645	0	0	0	0	0	0	0	0	0	0	0	0	0	0	0	0
XLOC_003956|PGSC0003DMT400009195,PGSC0003DMT400009196	PGSC0003DMB000000020:1294183-1418645	2881004	248128	0	0	0	0	2798429	142878	0	0	0	0	0	0	0	0
XLOC_003959|PGSC0003DMT400009206	PGSC0003DMB000000020:1428073-1429744	222375	134546	0	0	120913	178622	513867	140951	0	0	0	0	0	0	0	0
XLOC_003960|PGSC0003DMT400009207,PGSC0003DMT400009208,PGSC0003DMT400009209,PGSC0003DMT400009210,PGSC0003DMT400009211	PGSC0003DMB000000020:1449673-1451166	107,28	219815	121213	2102,75	362136	512233	329385	606357	461,51	371134	303628	164042	118605	0	428481	146839
XLOC_003962|PGSC0003DMT400009214,PGSC0003DMT400009215	PGSC0003DMB000000020:1466312-1473174	922195	781153	848223	762362	108236	676475	925379	626837	698351	915369	35152	277519	873259	884323	34205	677817
XLOC_003966|PGSC0003DMT400009222	PGSC0003DMB000000020:1508161-1511889	242333	781560	0	0	357763	838507	216934	150906	0	0	0	0	0	0	0	0
XLOC_003969|PGSC0003DMT400009224,PGSC0003DMT400009225	PGSC0003DMB000000020:1529557-1533072	0	0	0	0	0	0	0	0	0	0	0	0	0	0	0	0
XLOC_003970|PGSC0003DMT400009226	PGSC0003DMB000000020:1543416-1549036	502074	728776	586631	358467	103745	556652	522248	389715	559341	635075	141868	310336	510258	688177	412056	336372
XLOC_003971|PGSC0003DMT400009227	PGSC0003DMB000000020:1550747-1554066	0	0	0	0	0	0	0	0	0	0	0	0	0	0	0	0
XLOC_003972|PGSC0003DMT400009228,PGSC0003DMT400009229	PGSC0003DMB000000020:1555544-1566896	150992	120982	0	0	139321	627024	0	0	705346	739662	0	0	0	0	263321	255372
XLOC_003973|PGSC0003DMT400009232,PGSC0003DMT400009233	PGSC0003DMB000000020:1575021-1584708	246149	274771	149249	357146	174304	232735	158537	395894	170725	158903	0	0	286256	140955	0	0
XLOC_003974|PGSC0003DMT400009235,PGSC0003DMT400009236,PGSC0003DMT400009237	PGSC0003DMB000000020:1596518-1602738	0	0	0	0	0	0	0,282634	7216	0	0	0	0	0	0	0	0
XLOC_003977|PGSC0003DMT400009242,PGSC0003DMT400009243,PGSC0003DMT400009246	PGSC0003DMB000000020:1632698-1637642	289346	260706	207573	23327	230836	242642	162145	180298	216515	197408	0	0	0	0	0	0
XLOC_003978|PGSC0003DMT400009247,PGSC0003DMT400009248	PGSC0003DMB000000020:1670432-1674484	150067	534348	0	0	21978	627019	120484	321485	474187	1181104	0	0	316557	182999	33622	17738
XLOC_003979|PGSC0003DMT400009249	PGSC0003DMB000000020:1713744-1722137	687457	639728	704571	838415	627172	619811	467243	44136	469566	755737	199106	575466	698663	66419	2579314	399163
XLOC_003980|PGSC0003DMT400009250,PGSC0003DMT400009252,PGSC0003DMT400009253	PGSC0003DMB000000020:1723858-1731485	321197	287518	0	0	276911	260359	20096	2835653	192115	143769	0	0	0	0	0	0
XLOC_003981|PGSC0003DMT400009254	PGSC0003DMB000000020:1732170-1735756	323078	211728	0	0	271442	359261	246889	226298	22439	169538	0	0	0	0	0	0
XLOC_003982|PGSC0003DMT400009256,PGSC0003DMT400009257,PGSC0003DMT400009258,PGSC0003DMT400009259,PGSC0003DMT400009260,PGSC0003DMT400009261	PGSC0003DMB000000020:1737825-1742664	0	0	0	0	0	0	0	0	0	0	0	0	0	0	0	0
XLOC_003983|-	PGSC0003DMB000000020:1773967-1784133	0	0	547091	367991	0	0	0	0	0	0	0	0	0	0	0	0
XLOC_003984|PGSC0003DMT400004016,PGSC0003DMT400004017	PGSC0003DMB000000020:1796666-1801529	36195	306809	205721	283939	340724	262303	224266	352458	188078	242632	0	0	326262	206457	207889	228834
XLOC_003986|PGSC0003DMT400004008,PGSC0003DMT400004010	PGSC0003DMB000000020:1812236-1813773	919308	178645	435792	759121	209567	149691	476526	170732	117804	512146	406835	325468	107306	154028	848863	205785
XLOC_003987|PGSC0003DMT400004006,PGSC0003DMT400004007	PGSC0003DMB000000020:1825110-1827066	293876	334032	0	0	983333	307461	199726	309844	230379	773836	0	0	0	0	0	0
XLOC_003988|PGSC0003DMT400003999,PGSC0003DMT400004000,PGSC0003DMT400004001,PGSC0003DMT400004002,PGSC0003DMT400004003,PGSC0003DMT400004004,PGSC0003DMT400004005	PGSC0003DMB000000020:1845551-1852588	133707	168854	0	0	110092	141342	970360	916467	0	0	0	0	0	0	0	0
XLOC_003989|PGSC0003DMT400003998	PGSC0003DMB000000020:1878853-1880633	0	0	0	0	0	0	0	0	0	0	0	0	0	0	0	0
XLOC_003990|PGSC0003DMT400003995	PGSC0003DMB000000020:1986640-1988929	277527	463039	358799	1051109	442311	247345	285845	259233	250817	384505	0	0	687693	329368	0	0
XLOC_003992|PGSC0003DMT400003990,PGSC0003DMT400003991,PGSC0003DMT400003992,PGSC0003DMT400003993	PGSC0003DMB000000020:2023422-2030370	395837	266006	481308	369931	577225	232981	419516	221079	320753	569976	0	0	430263	514498	0	0
XLOC_003993|-	PGSC0003DMB000000020:2032681-2044213	354078	297393	334629	283863	446667	298532	323487	142353	120355	300056	0	0	303194	479167	13325	292439
XLOC_003994|PGSC0003DMT400003987,PGSC0003DMT400003988	PGSC0003DMB000000020:2073396-2081586	384826	382594	234974	243053	339726	464168	288845	303769	35141	354013	204692	224805	0	0	322276	171881
XLOC_004001|PGSC0003DMT400003986	PGSC0003DMB000000020:2128842-2133191	248579	802136	0	0	285067	301041	864269	331705	0	0	0	0	0	0	0	0
XLOC_004006|PGSC0003DMT400003983	PGSC0003DMB000000020:2192590-2194973	323805	276883	124677	616348	150279	232171	373578	175673	253871	271711	792764	140138	103435	167724	155389	220132
XLOC_004007|PGSC0003DMT400003981,PGSC0003DMT400003982	PGSC0003DMB000000020:2220918-2226348	0	0	0	0	0	0	0	0	0	0	0	0	0	0	0	0
XLOC_004008|PGSC0003DMT400003980	PGSC0003DMB000000020:2233044-2236101	170306	308554	0	0	403583	238351	195679	162948	394531	156429	0	0	0	0	0	0
XLOC_004009|-	PGSC0003DMB000000020:2300861-2312204	555616	750029	844437	199433	483722	855388	368587	310244	493387	552836	469332	42041	602392	490771	240591	507418
XLOC_004010|PGSC0003DMT400003969,PGSC0003DMT400003971	PGSC0003DMB000000020:2333177-2337923	0	0	0	0	0	0	463775	777656	0	0	0	0	0	0	0	0
XLOC_004011|PGSC0003DMT400003959	PGSC0003DMB000000020:2451914-2457769	0	0	0	0	0	0	387106	1055066	0	0	0	0	0	0	0	0
XLOC_004015|PGSC0003DMT400003954	PGSC0003DMB000000020:2518682-2522404	0	0	0	0	0	0	0	0	0	0	0	0	0	0	0	0
XLOC_004020|PGSC0003DMT400003937,PGSC0003DMT400003938,PGSC0003DMT400003939,PGSC0003DMT400003940	PGSC0003DMB000000020:2614383-2619021	156759	136993	0	0	247955	2040916	314049	906404	0	0	0	0	0	0	0	0
XLOC_004021|PGSC0003DMT400003934,PGSC0003DMT400003935,PGSC0003DMT400003936	PGSC0003DMB000000020:2661547-2666705	0	0	0	0	0	0	0	0	386785	194825	0	0	0	0	0	0
XLOC_004022|PGSC0003DMT400003933	PGSC0003DMB000000020:2694009-2696932	708671	699449	0	0	78988	42486	444742	720539	252096	716832	786359	401043	480813	587991	0	0
XLOC_004024|PGSC0003DMT400003922,PGSC0003DMT400003923,PGSC0003DMT400003924,PGSC0003DMT400003925,PGSC0003DMT400003927,PGSC0003DMT400003928,PGSC0003DMT400003929,PGSC0003DMT400030236,PGSC0003DMT400030237,PGSC0003DMT400030238	PGSC0003DMB000000020:2701566-2761386	767774	41,14	475707	382263	966042	647082	399604	515957	507309	442584	0	0	495263	513678	271097	361616
XLOC_004030|PGSC0003DMT400030257,PGSC0003DMT400030258,PGSC0003DMT400030259,PGSC0003DMT400030260,PGSC0003DMT400030261,PGSC0003DMT400030262,PGSC0003DMT400030263,PGSC0003DMT400030264	PGSC0003DMB000000020:2966594-2970987	156337	142294	143546	191174	138264	131165	106324	126802	952896	203654	645154	652867	950234	104124	764169	857611
XLOC_004031|PGSC0003DMT400030265	PGSC0003DMB000000020:2982417-2988111	442824	435969	269302	112465	596764	393138	405864	484388	415545	247368	599081	255705	236494	435647	0	0
XLOC_004035|PGSC0003DMT400030274,PGSC0003DMT400030275,PGSC0003DMT400030276	PGSC0003DMB000000020:3033140-3035895	132221	221665	0	0	183002	214455	169915	146663	192882	223078	0	0	223611	27461	0	0
XLOC_004050|PGSC0003DMT400038555,PGSC0003DMT400038556,PGSC0003DMT400038557,PGSC0003DMT400038558,PGSC0003DMT400038559,PGSC0003DMT400038560	PGSC0003DMB000000020:58541-70437	178,05	210535	228981	154768	215182	118258	941656	100421	174155	203479	602173	137916	125229	126533	714661	106493
XLOC_004054|PGSC0003DMT400091865	PGSC0003DMB000000020:93776-100130	0	0	259611	0	0	0	0	0	0	0	0	0	0	0	260505	0
XLOC_004057|PGSC0003DMT400009265,PGSC0003DMT400009266,PGSC0003DMT400009267,PGSC0003DMT400009268,PGSC0003DMT400009269	PGSC0003DMB000000020:209363-211705	0	0	0	0	0	0	587195	179728	0	0	0	0	0	0	0	0
XLOC_004058|PGSC0003DMT400009271	PGSC0003DMB000000020:238999-240095	397038	336315	407796	258034	384666	801388	294335	135985	343225	345768	0	0	0	0	0	0
XLOC_004062|PGSC0003DMT400009278,PGSC0003DMT400009279,PGSC0003DMT400009280,PGSC0003DMT400009281	PGSC0003DMB000000020:340037-343244	2737799	19369	275861	2897987	223087	240271	928758	144983	0	0	0	0	0	0	0	0
XLOC_004068|PGSC0003DMT400009288,PGSC0003DMT400009289,PGSC0003DMT400009290,PGSC0003DMT400009291,PGSC0003DMT400009292,PGSC0003DMT400009294	PGSC0003DMB000000020:459807-467067	0	0	0	0	0	0	0	0	0	0	0	0	0	0	0	0
XLOC_004069|PGSC0003DMT400009295,PGSC0003DMT400009296	PGSC0003DMB000000020:506957-509494	0	0	225756	607277	0	0	0	0	0	0	0	0	0	0	0	0
XLOC_004074|PGSC0003DMT400009302,PGSC0003DMT400009303	PGSC0003DMB000000020:614698-621117	159786	844223	177936	584274	19397	2809416	999799	130537	390407	179609	0	0	0	0	0	0
XLOC_004075|PGSC0003DMT400009304	PGSC0003DMB000000020:681666-687595	838327	96161	413962	374568	725181	815829	62294	603614	407645	598887	0	0	472589	746194	290771	387695
XLOC_004077|PGSC0003DMT400009306	PGSC0003DMB000000020:731040-739583	507,1	194316	178081	287282	322375	421,01	340291	238564	267089	308402	236258	61962	347378	296809	202647	265091
XLOC_004079|PGSC0003DMT400009308	PGSC0003DMB000000020:808216-811047	0	0	0	0	21103	2196478	133777	142422	0	0	0	0	0	0	0	0
XLOC_004080|PGSC0003DMT400009310	PGSC0003DMB000000020:812274-813106	0	0	0	0	0	0	0	0	0	0	0	0	0	0	0	0
XLOC_004083|PGSC0003DMT400009315,PGSC0003DMT400009316,PGSC0003DMT400009317	PGSC0003DMB000000020:915559-919245	0	0	0	0	0	0	646171	715989	0	0	0	0	0	0	0	0
XLOC_004084|PGSC0003DMT400009318	PGSC0003DMB000000020:919690-923956	332544	275209	543587	223572	190452	297581	197283	267779	0	0	0	0	362001	204136	0	0
XLOC_004086|PGSC0003DMT400009322	PGSC0003DMB000000020:937506-947647	0	0	0	0	0	0	0	0	0	0	0	0	0	0	0	0
XLOC_004089|PGSC0003DMT400009327,PGSC0003DMT400009328	PGSC0003DMB000000020:985351-988996	0	0	0	0	460378	337331	465777	728516	0	0	0	0	0	440099	0	0
XLOC_004092|PGSC0003DMT400009339	PGSC0003DMB000000020:1046423-1049127	214444	186,8	937252	154193	170504	249967	202945	184682	167,63	114237	572098	591168	178332	133568	153732	723446
XLOC_004093|PGSC0003DMT400009340,PGSC0003DMT400009341	PGSC0003DMB000000020:1075438-1078622	397429	516255	428189	751535	250089	482137	307468	294024	608823	615397	18589	29459	312002	309729	26473	327432
XLOC_004095|PGSC0003DMT400009344	PGSC0003DMB000000020:1095266-1096383	1559,54	1430,06	494619	2976,91	326856	2608,17	757871	986,42	1721,8	754258	1381,86	288664	843,99	148069	1485,43	569917
XLOC_004098|PGSC0003DMT400009346,PGSC0003DMT400009347	PGSC0003DMB000000020:1176772-1182312	279489	207361	0	0	535834	167448	771669	180816	0	0	0	0	0	0	0	0
XLOC_004099|PGSC0003DMT400009439	PGSC0003DMB000000020:1193229-1193618	0	0	0	0	0	0	0	0	0	0	0	0	0	0	0	0
XLOC_004100|PGSC0003DMT400009348,PGSC0003DMT400009349,PGSC0003DMT400009350	PGSC0003DMB000000020:1203810-1212861	172086	167641	0	0	183278	972582	777994	132979	0	0	0	0	0	0	0	0
XLOC_004101|PGSC0003DMT400009351,PGSC0003DMT400009352,PGSC0003DMT400009353,PGSC0003DMT400009354,PGSC0003DMT400009355,PGSC0003DMT400009356	PGSC0003DMB000000020:1213472-1218188	410619	189227	0	0	351112	24082	1024841	914032	0	0	0	0	0	0	0	0
XLOC_004102|-	PGSC0003DMB000000020:1256643-1266165	0	0	0	0	0	0	2875981	737824	0	0	0	0	0	0	0	0
XLOC_004106|PGSC0003DMT400009367	PGSC0003DMB000000020:1294183-1418645	0	0	0	0	0	0	0	0	0	0	0	0	0	0	0	0
XLOC_004109|PGSC0003DMT400009370,PGSC0003DMT400009371,PGSC0003DMT400009372,PGSC0003DMT400009373	PGSC0003DMB000000020:1431291-1438380	0	0	0	0	146817	101388	769279	697732	0	0	0	0	0	0	0	0
XLOC_004114|PGSC0003DMT400009381,PGSC0003DMT400009382,PGSC0003DMT400009383,PGSC0003DMT400009384	PGSC0003DMB000000020:1533357-1540614	192393	152523	0	0	0	0	0	0	0	0	0	0	0	0	0	0
XLOC_004115|PGSC0003DMT400009386,PGSC0003DMT400009387	PGSC0003DMB000000020:1555544-1566896	180115	219714	180261	688222	243016	204289	2714819	97826	14533	169936	0	0	0	0	0	0
XLOC_004116|PGSC0003DMT400009388,PGSC0003DMT400009389,PGSC0003DMT400009390	PGSC0003DMB000000020:1569364-1570484	0	0	0	0	0	0	0	0	0	0	0	0	0	0	0	0
XLOC_004120|PGSC0003DMT400009397,PGSC0003DMT400009398	PGSC0003DMB000000020:1618910-1624387	186013	158118	0	0	225164	167426	146003	140628	0	0	0	0	0	0	0	0
XLOC_004122|PGSC0003DMT400009406	PGSC0003DMB000000020:1638232-1642471	0	0	0	0	14225	151662	735715	1971125	0	0	0	0	0	0	0	0
XLOC_004128|PGSC0003DMT400009422,PGSC0003DMT400009423	PGSC0003DMB000000020:1681022-1683239	397909	193821	0	0	190015	178139	25924	208388	206991	1540929	0	0	270877	43040	0	0
XLOC_004129|PGSC0003DMT400009425	PGSC0003DMB000000020:1694081-1698225	135321	197154	898069	291272	749164	280	218047	112244	216179	530308	787292	366498	122055	2403267	283223	37763
XLOC_004130|PGSC0003DMT400009426,PGSC0003DMT400009427,PGSC0003DMT400009428,PGSC0003DMT400009429,PGSC0003DMT400009430	PGSC0003DMB000000020:1700450-1708018	0	0	0	0	0	0	184046	10209	0	0	0	0	0	0	0	0
XLOC_004132|PGSC0003DMT400009432	PGSC0003DMB000000020:1786334-1789470	625843	100322	10106	579144	1965	946757	40556	837027	737505	139181	819094	142466	513173	168494	79447	180423
XLOC_004134|PGSC0003DMT400003917,PGSC0003DMT400003918,PGSC0003DMT400003919	PGSC0003DMB000000020:1828290-1830279	108552	213432	2561721	1090,2	12896	351749	898887	101386	294785	249256	572435	55902	175687	1577484	361316	196647
XLOC_004137|PGSC0003DMT400003908	PGSC0003DMB000000020:1861851-1865287	926384	962568	483061	85251	348749	743657	503792	78225	720743	53246	223021	297362	601609	202295	484725	282015
XLOC_004153|PGSC0003DMT400003882,PGSC0003DMT400003883,PGSC0003DMT400003884,PGSC0003DMT400003886,PGSC0003DMT400003887	PGSC0003DMB000000020:1941256-1943770	0	0	0	0	0	0	2900758	720792	0	0	0	0	0	0	0	0
XLOC_004156|PGSC0003DMT400003877	PGSC0003DMB000000020:1955374-1956593	0	0	0	0	0	0	0	0	0	0	0	0	0	0	0	0
XLOC_004159|PGSC0003DMT400003870	PGSC0003DMB000000020:2007160-2013071	0	0	0	0	0	0	790339	959627	0	0	0	0	0	0	0	0
XLOC_004160|PGSC0003DMT400003869	PGSC0003DMB000000020:2045398-2047080	252214	211414	0	0	294534	224991	238126	242951	275944	218787	0	0	0	0	0	0
XLOC_004165|PGSC0003DMT400003850,PGSC0003DMT400003851,PGSC0003DMT400003852,PGSC0003DMT400003853,PGSC0003DMT400003854,PGSC0003DMT400003856,PGSC0003DMT400003857	PGSC0003DMB000000020:2156717-2164319	282593	186818	0	0	167705	207715	170866	155112	142061	167013	0	0	0	0	0	0
XLOC_004166|PGSC0003DMT400003845,PGSC0003DMT400003846,PGSC0003DMT400003847	PGSC0003DMB000000020:2181829-2189422	204743	144527	0	0	0	0	490937	150265	0	0	0	0	0	0	0	0
XLOC_004167|PGSC0003DMT400003838,PGSC0003DMT400003839,PGSC0003DMT400003840	PGSC0003DMB000000020:2195128-2202250	139004	19002	0	0	0	0	148441	730242	0	0	0	0	0	0	0	0
XLOC_004169|-	PGSC0003DMB000000020:2236910-2241874	0	0	0	0	0	0	0	0	0	0	0	0	0	0	0	0
XLOC_004170|PGSC0003DMT400003823	PGSC0003DMB000000020:2277739-2279520	229099	292318	324633	296095	31295	25948	161538	105100	278064	327743	0	0	0	0	794261	383755
XLOC_004171|PGSC0003DMT400003821,PGSC0003DMT400003822	PGSC0003DMB000000020:2282313-2284835	207509	209436	156595	294427	235135	212275	1561353	170445	197883	208508	0	0	0	0	0	0
XLOC_004173|PGSC0003DMT400086252,PGSC0003DMT400094217	PGSC0003DMB000000020:2312399-2315939	224272	202572	258634	24858	202825	930562	868447	306265	0	0	0	0	0	0	0	0
XLOC_004174|PGSC0003DMT400003819	PGSC0003DMB000000020:2319898-2320700	742773	850233	47582	109592	500127	573062	690755	637557	416498	458919	352401	251715	724278	381199	549078	572951
XLOC_004176|PGSC0003DMT400003813,PGSC0003DMT400003814,PGSC0003DMT400003815	PGSC0003DMB000000020:2354816-2361893	2958374	210373	2883926	259877	672615	142257	260993	206502	969518	182269	0	0	0	0	266168	616868
XLOC_004178|PGSC0003DMT400003807,PGSC0003DMT400003808,PGSC0003DMT400003809,PGSC0003DMT400003810	PGSC0003DMB000000020:2376279-2392580	206201	145252	682244	200439	216283	174682	1506901	917375	0	0	0	0	0	0	0	0
XLOC_004181|PGSC0003DMT400003800,PGSC0003DMT400003801	PGSC0003DMB000000020:2436398-2445986	144335	176556	0	0	133178	132421	899307	2090832	0	0	0	0	0	0	0	0
XLOC_004183|PGSC0003DMT400003796	PGSC0003DMB000000020:2473440-2476263	894166	745935	445549	198108	351584	316426	575605	721332	223987	647073	2011361	535105	824838	289417	0	0
XLOC_004185|PGSC0003DMT400003794	PGSC0003DMB000000020:2514717-2518162	40716	574814	294878	44102	187844	489177	398655	338063	146656	443227	0	0	714087	671134	564889	502123
XLOC_004186|PGSC0003DMT400003790,PGSC0003DMT400003791,PGSC0003DMT400003792	PGSC0003DMB000000020:2530278-2536541	0	0	0	0	0	0	559341	758184	0	0	0	0	0	0	0	0
XLOC_004189|PGSC0003DMT400003780,PGSC0003DMT400003781	PGSC0003DMB000000020:2619651-2626317	199479	149609	0	0	596716	167186	992979	2589085	0	0	0	0	0	0	0	0
XLOC_004190|PGSC0003DMT400003777	PGSC0003DMB000000020:2630413-2636417	243006	15438	0	177,67	134534	25225	0	0	393881	595198	106645	457049	0	0	317878	154123
XLOC_004191|PGSC0003DMT400003774	PGSC0003DMB000000020:2640909-2641970	649058	638841	232928	329734	531407	359807	241669	247633	391,18	664,26	424112	630437	226751	325479	266344	478331
XLOC_004192|PGSC0003DMT400003773	PGSC0003DMB000000020:2647108-2648271	0	0	0	0	0	0	0	0	0	0	0	0	0	0	0	0
XLOC_004194|PGSC0003DMT400003768,PGSC0003DMT400003769	PGSC0003DMB000000020:2672057-2680755	253861	212604	0	0	2805764	229734	1090890	178758	190245	133923	0	0	0	0	0	0
XLOC_004198|PGSC0003DMT400030290,PGSC0003DMT400030291	PGSC0003DMB000000020:2871514-2876884	191424	261149	0	0	1875430	133171	135843	1746500	1644293	195251	0	0	0	0	0	0
XLOC_004201|PGSC0003DMT400030293	PGSC0003DMB000000020:2971286-2976165	312559	110315	0	0	162225	10139	218593	973188	151985	212654	0	0	0	0	0	0
XLOC_004202|PGSC0003DMT400030294	PGSC0003DMB000000020:2989851-2998515	361904	264041	0	0	801432	250447	206532	175785	0	0	0	0	0	0	0	0
XLOC_004204|PGSC0003DMT400030297,PGSC0003DMT400030298	PGSC0003DMB000000020:3018049-3024878	0	0	0	0	0	0	0	0	0	0	0	0	0	0	0	0
XLOC_004206|-	PGSC0003DMB000000020:279370-281294	0	0	0	0	0	0	0	0	0	0	0	0	0	0	0	0
XLOC_004207|-	PGSC0003DMB000000020:282939-283880	376141	250532	382381	283085	0	0	0	0	0	0	0	0	0	0	0	0
XLOC_004208|-	PGSC0003DMB000000020:2371621-2372440	0	0	0	0	0	0	0	0	0	0	0	0	0	0	0	0
XLOC_004209|-	PGSC0003DMB000000020:2958496-2959010	0	0	0	0	0	0	153565	379823	0	0	0	0	0	0	0	0
XLOC_004210|PGSC0003DMT400062355	PGSC0003DMB000000021:28107-30482	0	0	0	0	0	0	322712	862038	0	0	0	0	0	0	0	0
XLOC_004211|PGSC0003DMT400062354	PGSC0003DMB000000021:39116-43188	0	0	0	0	0	0	0	0	0	0	0	0	0	0	0	0
XLOC_004212|PGSC0003DMT400062352,PGSC0003DMT400062353	PGSC0003DMB000000021:58916-64002	29301	165492	262927	0	204666	855925	180533	861354	50807	271479	0	0	0	0	0	0
XLOC_004213|PGSC0003DMT400062350,PGSC0003DMT400062351	PGSC0003DMB000000021:73430-77244	166014	976553	0	0	0	0	0	0	0	0	0	0	0	0	0	0
XLOC_004214|PGSC0003DMT400022725,PGSC0003DMT400022726,PGSC0003DMT400022727	PGSC0003DMB000000021:144596-151446	430022	418267	0	0	34,15	225194	230732	185263	0	0	0	0	300798	692979	0	0
XLOC_004217|PGSC0003DMT400022730	PGSC0003DMB000000021:234744-238103	0	0	0	0	0	0	0	0	0	0	0	0	0	0	0	0
XLOC_004218|PGSC0003DMT400022733,PGSC0003DMT400022734	PGSC0003DMB000000021:244104-246569	0	0	0	297674	0	0	0	0	1321418	16767	0	0	0	0	0	0
XLOC_004219|PGSC0003DMT400022735,PGSC0003DMT400022738	PGSC0003DMB000000021:287567-294874	2342636	253962	0	0	135806	718309	0	0	0	0	0	0	0	0	0	0
XLOC_004224|PGSC0003DMT400022748	PGSC0003DMB000000021:414623-419630	123166	151992	61791	621322	119209	990917	891771	683019	926967	815701	58318	496776	699168	111417	488817	254829
XLOC_004225|PGSC0003DMT400022749,PGSC0003DMT400022750	PGSC0003DMB000000021:422696-430445	0	0	0	0	0	0	0	0	0	0	0	0	0	0	0	0
XLOC_004228|PGSC0003DMT400022757,PGSC0003DMT400022760	PGSC0003DMB000000021:466661-474542	301766	181179	0	0	173924	546373	1856104	151144	0	0	0	0	0	0	0	0
XLOC_004229|PGSC0003DMT400022761	PGSC0003DMB000000021:499853-503824	194309	289558	0	0	313756	28014	235548	272251	0	0	0	0	146043	404967	0	0
XLOC_004230|PGSC0003DMT400022763	PGSC0003DMB000000021:506164-512676	107944	530649	411188	187909	880395	800359	67943	73821	549884	42491	966773	36254	608512	480404	595984	794646
XLOC_004231|PGSC0003DMT400022764	PGSC0003DMB000000021:556397-564806	137049	167684	0	0	164392	165973	149522	238962	0	0	0	0	329637	173493	0	0
XLOC_004232|PGSC0003DMT400022765,PGSC0003DMT400022766	PGSC0003DMB000000021:567392-577149	0	0	0	0	0	0	0	0	0	0	0	0	0	0	0	0
XLOC_004233|PGSC0003DMT400022768,PGSC0003DMT400022769,PGSC0003DMT400022770	PGSC0003DMB000000021:587632-590842	0	0	0	0	688022	13714	348692	765853	0	0	0	0	0	0	0	0
XLOC_004235|-	PGSC0003DMB000000021:644617-649611	0	0	0	0	0	0	0	0	0	0	0	0	0	0	0	0
XLOC_004238|PGSC0003DMT400022788	PGSC0003DMB000000021:706710-709714	0	0	0	0	0	0	0	0	0	0	0	0	0	0	0	0
XLOC_004241|PGSC0003DMT400022797	PGSC0003DMB000000021:817483-820101	0	0	0	0	0	0	0	0	0	0	0	0	0	0	0	0
XLOC_004244|PGSC0003DMT400022803,PGSC0003DMT400022804	PGSC0003DMB000000021:858281-864808	0	0	0	0	0	0	0	0	0	0	0	0	0	0	0	0
XLOC_004247|PGSC0003DMT400022810,PGSC0003DMT400022811,PGSC0003DMT400022812,PGSC0003DMT400022813,PGSC0003DMT400022814	PGSC0003DMB000000021:901857-908506	0	0	0	0	0	0	0	0	0	0	0	0	0	0	0	0
XLOC_004249|PGSC0003DMT400022816,PGSC0003DMT400022817	PGSC0003DMB000000021:974192-982812	0	0	0	0	0	0	0	0	0	0	0	0	0	0	0	0
XLOC_004250|PGSC0003DMT400022822,PGSC0003DMT400022823,PGSC0003DMT400022824	PGSC0003DMB000000021:1016114-1021199	290538	354889	285828	453353	276154	313719	252488	235,78	222378	264352	159624	127068	193844	242504	235724	199123
XLOC_004251|PGSC0003DMT400022826,PGSC0003DMT400022827	PGSC0003DMB000000021:1032273-1042325	0	0	0	0	0	0	0	0	0	0	0	0	0	0	0	0
XLOC_004253|PGSC0003DMT400022830	PGSC0003DMB000000021:1064942-1068200	254079	238176	123759	135629	183,3	225415	193124	233798	154496	232349	123749	131753	235722	109424	109131	166084
XLOC_004255|PGSC0003DMT400022844,PGSC0003DMT400022846,PGSC0003DMT400022847,PGSC0003DMT400022848	PGSC0003DMB000000021:1115645-1125857	131898	220867	185473	896757	183141	179127	10212	142462	859433	197666	0	0	0	0	620194	350277
XLOC_004256|PGSC0003DMT400089937	PGSC0003DMB000000021:1133021-1157600	183961	90172	676558	241059	259993	280132	0	0	0	0	0	0	0	0	0	0
XLOC_004258|PGSC0003DMT400022853	PGSC0003DMB000000021:1224328-1229777	317717	336406	0	0	329803	961927	226644	267097	0	0	0	0	0	0	0	0
XLOC_004259|PGSC0003DMT400022857	PGSC0003DMB000000021:1256538-1260950	587559	292553	236638	202032	516282	687695	404938	566609	40,31	482415	0	0	0	0	0	0
XLOC_004260|PGSC0003DMT400022860,PGSC0003DMT400022861	PGSC0003DMB000000021:1300645-1309458	27672	389966	141609	726351	256929	390149	19951	178443	326754	121784	0	0	0	0	0	0
XLOC_004262|PGSC0003DMT400022863	PGSC0003DMB000000021:1313842-1318966	0	0	0	0	251162	2199400	0	0	0	0	0	0	0	0	0	0
XLOC_004263|PGSC0003DMT400022864	PGSC0003DMB000000021:1320308-1322894	253384	250,98	230059	183266	200803	235095	224654	173694	169,58	196862	112736	512439	221172	135807	131221	116641
XLOC_004265|PGSC0003DMT400022871,PGSC0003DMT400022872	PGSC0003DMB000000021:1392311-1394521	187041	494635	0	0	0	0	132425	982555	454015	247647	0	0	0	0	0	0
XLOC_004268|PGSC0003DMT400022875,PGSC0003DMT400022876	PGSC0003DMB000000021:1414966-1421086	583647	612412	130308	430569	644056	716496	522855	414447	347725	115908	138452	504363	497975	430587	234511	514956
XLOC_004269|PGSC0003DMT400022877,PGSC0003DMT400022878	PGSC0003DMB000000021:1437197-1442337	186224	149216	292272	196259	236846	2536885	130943	558731	783165	221897	0	0	0	0	179559	269615
XLOC_004270|PGSC0003DMT400022879,PGSC0003DMT400022881,PGSC0003DMT400022882	PGSC0003DMB000000021:1443276-1447799	138993	864919	0	0	0	0	169553	150971	0	0	0	0	0	0	0	0
XLOC_004271|PGSC0003DMT400022884,PGSC0003DMT400022885,PGSC0003DMT400022886	PGSC0003DMB000000021:1452236-1462562	2901092	243128	909273	21916	269563	250162	866793	148841	0	0	0	0	0	0	0	0
XLOC_004276|PGSC0003DMT400022902,PGSC0003DMT400022903	PGSC0003DMB000000021:1496250-1503802	303166	42669	510714	461841	417141	422234	391888	29537	456084	492282	288014	19902	647421	306682	2243291	318684
XLOC_004277|PGSC0003DMT400022904	PGSC0003DMB000000021:1551380-1552537	148329	108193	161137	207257	342159	214919	933624	773579	185926	403671	105392	619953	0	0	130823	2079997
XLOC_004279|-	PGSC0003DMB000000021:1630396-1639942	0	0	0	0	0	0	0	0	0	0	0	0	0	0	0	0
XLOC_004280|PGSC0003DMT400022911	PGSC0003DMB000000021:1645067-1649792	0	0	0	0	2949974	156216	0	0	0	0	0	0	0	0	0	0
XLOC_004290|-	PGSC0003DMB000000021:2015154-2017160	0	0	0	0	0	0	0	0	0	0	0	0	0	0	0	0
XLOC_004291|-	PGSC0003DMB000000021:2026744-2028770	0	0	0	0	0	0	0	0	0	0	0	0	0	0	0	0
XLOC_004292|PGSC0003DMT400006847,PGSC0003DMT400006849	PGSC0003DMB000000021:2041247-2055391	207634	845773	0	0	0	0	24785	2306447	0	0	0	0	0	0	0	0
XLOC_004294|PGSC0003DMT400006848	PGSC0003DMB000000021:2055709-2062425	0	0	0	0	0	0	990568	456213	0	0	0	0	0	0	0	0
XLOC_004296|PGSC0003DMT400007072	PGSC0003DMB000000021:2085532-2106312	0	0	200164	0	0	0	0	0	0	0	0	0	0	0	0	0
XLOC_004298|PGSC0003DMT400006854,PGSC0003DMT400006855	PGSC0003DMB000000021:2110843-2135745	621035	194191	275853	373306	412921	104383	394447	346142	526499	460048	0	0	0	0	466952	610083
XLOC_004309|PGSC0003DMT400006885,PGSC0003DMT400006886,PGSC0003DMT400006887	PGSC0003DMB000000021:2431991-2435907	508082	553066	310144	844202	283418	355545	24886	38367	452218	298327	0	0	650908	31457	219629	523083
XLOC_004311|PGSC0003DMT400006891,PGSC0003DMT400006892	PGSC0003DMB000000021:2468060-2474473	0	0	0	0	0	0	585172	771309	0	0	0	0	0	0	0	0
XLOC_004313|PGSC0003DMT400006894,PGSC0003DMT400006895	PGSC0003DMB000000021:2480185-2482317	801509	1162,8	160334	945044	283809	1049,13	414493	594299	751634	242899	500865	206839	671617	297747	444647	200684
XLOC_004318|PGSC0003DMT400006908	PGSC0003DMB000000021:2618108-2628728	484887	521189	504759	1216229	705287	550519	458292	32297	264529	596598	155031	413409	44737	540138	265125	352819
XLOC_004319|PGSC0003DMT400006909,PGSC0003DMT400006911,PGSC0003DMT400006913	PGSC0003DMB000000021:2648534-2657615	0	0	0	0	0	0	0	0	0	0	0	0	0	0	0	0
XLOC_004320|PGSC0003DMT400006914,PGSC0003DMT400006915,PGSC0003DMT400006916	PGSC0003DMB000000021:2696619-2708792	681592	151,21	897642	506246	44922	477296	367727	606347	673385	418742	651148	529058	29275	808915	887739	576844
XLOC_004321|PGSC0003DMT400006917,PGSC0003DMT400006918,PGSC0003DMT400006919,PGSC0003DMT400006920,PGSC0003DMT400006921,PGSC0003DMT400006922,PGSC0003DMT400006923	PGSC0003DMB000000021:2712232-2722633	296598	989109	0	0	0	0	110271	619156	0	0	0	0	0	0	0	0
XLOC_004322|PGSC0003DMT400006925,PGSC0003DMT400006927	PGSC0003DMB000000021:2793119-2797691	131223	128654	110876	563776	975368	117576	953431	107493	110294	128,96	335169	792266	748921	139874	563512	655022
XLOC_004323|PGSC0003DMT400006928,PGSC0003DMT400006934,PGSC0003DMT400006935,PGSC0003DMT400006936	PGSC0003DMB000000021:2845810-2854321	373671	389278	435849	382909	614611	362916	396184	206869	267,77	503613	147794	923251	317424	596533	209244	561748
XLOC_004324|PGSC0003DMT400006937	PGSC0003DMB000000021:2883541-2887049	0	0	0	0	321754	160877	0	0	0	0	0	0	0	0	0	0
XLOC_004325|PGSC0003DMT400006938,PGSC0003DMT400006939,PGSC0003DMT400006940	PGSC0003DMB000000021:2890335-2895302	36956	326217	191537	157927	271612	349479	353983	222071	300096	485652	1524829	310543	312569	302128	247694	110086
XLOC_004332|-	PGSC0003DMB000000021:2981243-2982470	740664	229831	135928	423547	228116	199481	197955	111755	265695	15978	316886	347513	163529	978032	954901	962324
XLOC_004333|PGSC0003DMT400006946,PGSC0003DMT400006947,PGSC0003DMT400006949	PGSC0003DMB000000021:2993173-3021436	420077	418486	240202	997877	2533079	602043	280393	391767	393972	215778	374617	272512	40844	500379	29392	16845
XLOC_004334|PGSC0003DMT400006951,PGSC0003DMT400006952	PGSC0003DMB000000021:3027498-3033989	137355	1111739	0	0	948942	185867	0	0	0	0	0	0	0	0	0	0
XLOC_004336|PGSC0003DMT400062345,PGSC0003DMT400062346,PGSC0003DMT400062347	PGSC0003DMB000000021:13583-20292	553702	406186	214823	504098	368766	466536	454948	466417	304192	451821	1807861	210506	335258	277099	0	0
XLOC_004338|PGSC0003DMT400062344	PGSC0003DMB000000021:24675-27127	878683	726143	330179	83569	830539	537626	719439	800745	583587	874867	537444	268722	676562	432389	484232	135925
XLOC_004341|PGSC0003DMT400062339	PGSC0003DMB000000021:89556-96208	175906	152823	0	0	196644	643774	16,75	568768	789565	198853	0	0	0	0	0	0
XLOC_004342|PGSC0003DMT400062337	PGSC0003DMB000000021:97355-99671	0	0	0	0	0	0	0	0	0	0	0	0	0	0	0	0
XLOC_004345|PGSC0003DMT400022933,PGSC0003DMT400022934,PGSC0003DMT400022935,PGSC0003DMT400022936,PGSC0003DMT400022937	PGSC0003DMB000000021:135665-143213	0	0	0	0	0	0	0	0	0	0	0	0	0	0	0	0
XLOC_004349|PGSC0003DMT400022950,PGSC0003DMT400022952	PGSC0003DMB000000021:218448-223484	0	0	0	0	0	0	0	0	0	0	0	0	0	0	0	0
XLOC_004350|PGSC0003DMT400022949,PGSC0003DMT400022959	PGSC0003DMB000000021:225805-231283	0	0	0	0	0	0	0	0	0	0	0	0	0	0	0	0
XLOC_004352|PGSC0003DMT400022960,PGSC0003DMT400022961	PGSC0003DMB000000021:238192-242226	0	0	0	0	0	0	0	0	0	0	0	0	0	0	0	0
XLOC_004354|PGSC0003DMT400022965	PGSC0003DMB000000021:265538-266118	0	0	0	0	0	0	0	0	0	0	0	0	0	0	0	0
XLOC_004355|PGSC0003DMT400022967,PGSC0003DMT400022968,PGSC0003DMT400022969,PGSC0003DMT400022970,PGSC0003DMT400022971,PGSC0003DMT400022972	PGSC0003DMB000000021:294967-300515	269109	248156	0	0	0	0	499532	1365613	0	0	0	0	0	0	0	0
XLOC_004367|PGSC0003DMT400022995	PGSC0003DMB000000021:449210-449734	0	0	0	0	0	0	164761	220058	0	0	984655	54156	0	0	0	0
XLOC_004368|PGSC0003DMT400022996,PGSC0003DMT400022997	PGSC0003DMB000000021:514297-517248	0	0	0	0	0	0	0	0	0	0	0	0	0	0	0	0
XLOC_004372|PGSC0003DMT400023005,PGSC0003DMT400023006,PGSC0003DMT400023008,PGSC0003DMT400023009	PGSC0003DMB000000021:601285-604722	0	0	0	0	0	0	0	0	0	0	0	0	0	0	0	0
XLOC_004373|PGSC0003DMT400023012	PGSC0003DMB000000021:655271-663338	0	0	0	0	0	0	391311	734132	0	0	0	0	0	0	0	0
XLOC_004374|PGSC0003DMT400023014,PGSC0003DMT400023015,PGSC0003DMT400023016,PGSC0003DMT400023017,PGSC0003DMT400023018	PGSC0003DMB000000021:673653-678478	9902,38	9916,65	13048,7	2287,69	9525,65	8129,95	10496,4	8890,3	4993,48	12343,7	1090,17	1543,6	6558,18	8935,09	4895,22	14944,7
XLOC_004378|PGSC0003DMT400023028,PGSC0003DMT400023029	PGSC0003DMB000000021:758115-762331	0	0	0	0	13088	759547	521899	820063	211556	982971	0	0	0	0	0	0
XLOC_004379|PGSC0003DMT400023030,PGSC0003DMT400023033	PGSC0003DMB000000021:782274-784394	0	0	0	0	0	0	0	0	0	0	0	0	0	0	0	0
XLOC_004382|PGSC0003DMT400023038	PGSC0003DMB000000021:803258-804052	0	0	0	0	0	0	0	0	0	0	0	0	0	0	0	0
XLOC_004383|PGSC0003DMT400023039	PGSC0003DMB000000021:820748-824323	3237,53	2912,77	2801,18	2341,43	2822,73	2989,05	3200,41	2048,41	1494,6	3004,74	1342,88	1062,66	2009,89	2312,03	1365,39	1509,33
XLOC_004385|-	PGSC0003DMB000000021:851473-854623	100999	142587	0	0	111831	78631	847624	849075	523861	824595	0	0	45549	958925	720643	160143
XLOC_004386|PGSC0003DMT400023046	PGSC0003DMB000000021:883482-887739	232782	177039	184162	121113	209407	191221	205023	168677	125595	233367	726611	150799	136983	170656	114603	107,18
XLOC_004387|PGSC0003DMT400023047,PGSC0003DMT400023048	PGSC0003DMB000000021:908979-911865	231589	206837	235712	172857	387325	248382	274477	195045	180489	255099	125989	318639	159372	156558	124353	111478
XLOC_004390|PGSC0003DMT400023052	PGSC0003DMB000000021:925030-934277	0	0	0	0	144164	965384	2228681	277985	0	0	0	0	0	0	0	0
XLOC_004394|PGSC0003DMT400023055	PGSC0003DMB000000021:939440-948515	627594	65228	542993	442926	524831	875949	474813	427979	66901	66648	357253	44478	59153	566646	247383	439554
XLOC_004396|PGSC0003DMT400023060,PGSC0003DMT400023061	PGSC0003DMB000000021:957983-961451	277398	293726	111668	153718	258167	207931	183978	185011	189508	204099	723353	103681	138757	150625	125773	158551
XLOC_004397|PGSC0003DMT400023062,PGSC0003DMT400023063	PGSC0003DMB000000021:982895-986366	805276	719646	922201	554614	69839	713906	65935	412473	657684	945606	216579	277457	474494	670174	438705	618845
XLOC_004398|PGSC0003DMT400023064	PGSC0003DMB000000021:996676-997781	107723	106169	722623	2550795	703276	632948	92111	721442	632531	99565	10194	356792	549977	458314	362556	515635
XLOC_004399|PGSC0003DMT400023065,PGSC0003DMT400023066	PGSC0003DMB000000021:999288-1003561	0	0	0	0	0	0	615113	494449	0	0	0	0	0	0	0	0
XLOC_004400|PGSC0003DMT400023067,PGSC0003DMT400023068,PGSC0003DMT400023069	PGSC0003DMB000000021:1004437-1008274	0	0	130753	218696	0	0	131374	429070	0	0	0	0	0	0	0	0
XLOC_004401|PGSC0003DMT400023072	PGSC0003DMB000000021:1032273-1042325	2000770	15336	2875496	183902	110276	219534	135177	944454	0	0	0	0	0	0	0	0
XLOC_004402|PGSC0003DMT400023075	PGSC0003DMB000000021:1070303-1077930	338181	518355	549642	320255	508181	359404	385177	442245	313227	520653	726765	266537	0	0	149374	245127
XLOC_004407|PGSC0003DMT400089937	PGSC0003DMB000000021:1133021-1157600	0	0	0	0	0	0	0	0	0	0	0	0	0	0	0	0
XLOC_004408|PGSC0003DMT400023077,PGSC0003DMT400023078	PGSC0003DMB000000021:1171680-1176374	245774	440213	0	0	629696	781101	354388	370159	675919	106075	364415	216988	0	0	540765	0
XLOC_004409|PGSC0003DMT400023082	PGSC0003DMB000000021:1207951-1213428	926614	294336	0	0	213748	180349	0	0	240307	0	0	0	0	0	257115	0
XLOC_004410|PGSC0003DMT400023083,PGSC0003DMT400023085	PGSC0003DMB000000021:1238584-1254104	425697	478009	473781	283981	509368	378844	298809	183259	297592	487761	15,78	245989	283787	362532	189277	269981
XLOC_004411|PGSC0003DMT400023086,PGSC0003DMT400023087,PGSC0003DMT400023088	PGSC0003DMB000000021:1282243-1291404	0	0	426966	24585	0	0	0	0	0	0	0	0	0	0	0	0
XLOC_004412|PGSC0003DMT400023089	PGSC0003DMB000000021:1293579-1296781	118661	169425	117706	143987	733889	147229	137742	148027	108131	167732	523852	334746	118341	740735	919763	837694
XLOC_004426|PGSC0003DMT400023117,PGSC0003DMT400023118,PGSC0003DMT400023119	PGSC0003DMB000000021:1524729-1529595	138883	314904	0	0	0	0	23712	2880274	216458	182832	0	0	0	0	0	0
XLOC_004428|PGSC0003DMT400023121,PGSC0003DMT400023122,PGSC0003DMT400023123	PGSC0003DMB000000021:1540351-1543308	23209	241432	20267	166713	2354659	22,19	184528	171152	695903	239353	0	0	0	0	11621	387368
XLOC_004430|PGSC0003DMT400023127,PGSC0003DMT400023128	PGSC0003DMB000000021:1569472-1573456	161590	171319	0	0	0	0	0	0	0	0	0	0	0	0	0	0
XLOC_004432|PGSC0003DMT400023130,PGSC0003DMT400023131	PGSC0003DMB000000021:1654251-1655806	0	0	0	0	0	0	725445	201856	0	0	0	0	0	0	0	0
XLOC_004434|PGSC0003DMT400023182	PGSC0003DMB000000021:1699095-1699470	0	0	951695	563649	333437	694661	202184	300044	0	0	181245	100692	72432	19061	0	0
XLOC_004435|PGSC0003DMT400023134	PGSC0003DMB000000021:1730439-1731140	683451	482436	0	0	20,27	147802	276547	34,2	0	0	0	0	440322	231748	0	0
XLOC_004438|PGSC0003DMT400023142,PGSC0003DMT400023143	PGSC0003DMB000000021:1777920-1787821	291922	275252	211164	633549	404774	181536	475622	30353	421359	290948	0	0	0	0	1231905	257618
XLOC_004439|PGSC0003DMT400023144,PGSC0003DMT400023145	PGSC0003DMB000000021:1791108-1797190	0	0	0	0	0	0	0	0	0	0	0	0	0	0	0	0
XLOC_004440|PGSC0003DMT400023148	PGSC0003DMB000000021:1799373-1808619	0	0	0	0	0	0	645723	827592	0	0	0	0	0	0	0	0
XLOC_004441|PGSC0003DMT400023149,PGSC0003DMT400023150,PGSC0003DMT400023153,PGSC0003DMT400023157,PGSC0003DMT400023158	PGSC0003DMB000000021:1811072-1818845	0	0	0	0	202231	909254	0	0	0	0	0	0	0	0	0	0
XLOC_004442|PGSC0003DMT400023163,PGSC0003DMT400023164,PGSC0003DMT400023165,PGSC0003DMT400023167,PGSC0003DMT400023169	PGSC0003DMB000000021:1832646-1839565	181153	249688	0	0	0	0	139361	0	0	0	0	0	0	0	0	0
XLOC_004443|PGSC0003DMT400006953	PGSC0003DMB000000021:1909684-1913521	142306	991122	494702	140577	840362	103404	105098	124064	836527	898492	475825	237913	128356	92326	63179	722045
XLOC_004444|PGSC0003DMT400006836	PGSC0003DMB000000021:1914272-1922603	0	0	399991	0	0	0	0	0	0	0	0	0	0	0	0	0
XLOC_004455|PGSC0003DMT400006973,PGSC0003DMT400006974,PGSC0003DMT400006975,PGSC0003DMT400006977,PGSC0003DMT400006978,PGSC0003DMT400006980	PGSC0003DMB000000021:2085532-2106312	38668	156478	209739	233626	240456	100904	469643	269025	907018	60474	919291	170234	317508	394491	251202	120,53
XLOC_004456|PGSC0003DMT400006999,PGSC0003DMT400007000	PGSC0003DMB000000021:2184589-2189814	945364	758864	576754	686166	143,41	58426	850991	713123	636439	105037	39978	523393	632391	912621	352036	494087
XLOC_004457|-	PGSC0003DMB000000021:2223123-2238208	0	0	0	0	0	0	0	0	0	0	0	0	0	0	0	0
XLOC_004458|-	PGSC0003DMB000000021:2245458-2246708	0	0	0	0	0	0	0	0	0	0	0	0	0	0	0	0
XLOC_004460|PGSC0003DMT400007007	PGSC0003DMB000000021:2294590-2296921	0	0	0	0	615177	0	0	0	0	0	0	0	0	0	0	0
XLOC_004467|PGSC0003DMT400007016	PGSC0003DMB000000021:2493945-2497438	296629	224989	0	0	10322	320623	882763	20755	20659	137903	0	0	0	0	0	0
XLOC_004468|PGSC0003DMT400007017	PGSC0003DMB000000021:2569647-2573234	0	0	0	0	0	0	0	0	0	0	0	0	0	0	0	0
XLOC_004469|-	PGSC0003DMB000000021:2592101-2611760	205597	472794	186469	652944	316802	202472	174288	171432	929535	18749	2217662	25795	172608	313178	0	0
XLOC_004470|PGSC0003DMT400007020,PGSC0003DMT400007021	PGSC0003DMB000000021:2630195-2633825	0	0	0	0	199442	623642	0	0	0	0	0	0	0	0	0	0
XLOC_004476|PGSC0003DMT400007030,PGSC0003DMT400007031,PGSC0003DMT400007032,PGSC0003DMT400007033	PGSC0003DMB000000021:2696619-2708792	1033242	144119	0	0	169059	2644996	820322	409377	0	0	0	0	0	0	0	0
XLOC_004477|-	PGSC0003DMB000000021:2724575-2742566	0	0	0	0	152419	796840	100692	308077	0	0	0	0	0	0	0	0
XLOC_004478|PGSC0003DMT400007037,PGSC0003DMT400007038,PGSC0003DMT400007039,PGSC0003DMT400007040,PGSC0003DMT400007041	PGSC0003DMB000000021:2751007-2761218	55482	565525	816073	656252	254999	766503	477046	276284	40923	48152	397361	169661	374249	230357	184786	740794
XLOC_004479|PGSC0003DMT400007042,PGSC0003DMT400007043,PGSC0003DMT400007044,PGSC0003DMT400007045	PGSC0003DMB000000021:2781341-2789347	233361	173938	0	0	0	0	685796	776384	0	0	0	0	0	0	0	0
XLOC_004480|PGSC0003DMT400007048	PGSC0003DMB000000021:2804598-2809883	648083	689864	298,16	1844,87	593418	825011	287506	342869	591656	478576	562535	181695	535565	474326	424,78	302066
XLOC_004484|PGSC0003DMT400007053	PGSC0003DMB000000021:2840564-2841393	0	0	0	0	238732	497358	0	0	0	0	0	0	0	0	0	0
XLOC_004485|PGSC0003DMT400007054,PGSC0003DMT400007055,PGSC0003DMT400007056	PGSC0003DMB000000021:2858548-2863061	18335	164184	0	0	138418	201829	209699	220177	0	0	0	0	0	0	0	0
XLOC_004490|PGSC0003DMT400007059	PGSC0003DMB000000021:2956359-2964227	418237	328029	206523	215184	200994	361789	236438	206186	165711	313009	0	0	0	0	0	0
XLOC_004491|PGSC0003DMT400007060	PGSC0003DMB000000021:2978545-2979630	230575	463673	413062	1008,88	111324	467328	697526	376908	465861	240785	719419	537883	386923	270464	259,85	510135
XLOC_004492|PGSC0003DMT400007062	PGSC0003DMB000000021:3022902-3025696	298971	221226	131951	233161	311057	321046	314932	242671	299445	198,64	175802	113754	223168	293643	277071	248464
XLOC_004493|PGSC0003DMT400007063,PGSC0003DMT400007064,PGSC0003DMT400007068,PGSC0003DMT400007069	PGSC0003DMB000000021:3040168-3044730	213472	226101	2244112	901413	0	0	964981	765351	0	0	0	0	0	0	0	0
XLOC_004510|PGSC0003DMT400008133	PGSC0003DMB000000022:870293-879910	496511	397209	247136	148434	490202	492493	21529	290637	270406	297272	207521	240724	208991	46355	0	0
XLOC_004515|PGSC0003DMT400056800	PGSC0003DMB000000022:1163132-1177980	70464	223539	0	0	131961	2042407	354926	152317	140484	283335	0	0	0	0	0	0
XLOC_004516|-	PGSC0003DMB000000022:1196075-1210054	0	0	0	0	0	0	1255614	879314	0	0	0	0	0	0	0	0
XLOC_004518|PGSC0003DMT400041230	PGSC0003DMB000000022:1404211-1404754	0	0	0	0	0	0	154657	504676	955836	300911	0	0	166217	568638	0	0
XLOC_004527|PGSC0003DMT400013045,PGSC0003DMT400013046	PGSC0003DMB000000022:2160705-2164936	171554	841608	203312	645468	226134	120133	548512	12934	137712	166874	0	0	0	0	1917038	531098
XLOC_004532|PGSC0003DMT400013050,PGSC0003DMT400013051	PGSC0003DMB000000022:2313205-2313831	0	0	0	0	0	0	0	0	0	0	0	0	0	0	0	0
XLOC_004551|PGSC0003DMT400022304,PGSC0003DMT400022305,PGSC0003DMT400022306,PGSC0003DMT400022307,PGSC0003DMT400022308,PGSC0003DMT400022309,PGSC0003DMT400022310,PGSC0003DMT400022311,PGSC0003DMT400022312	PGSC0003DMB000000022:2904709-2912803	201047	147119	0	0	25319	196835	135818	1180770	0	0	0	0	0	0	0	0
XLOC_004563|PGSC0003DMT400013736,PGSC0003DMT400013737,PGSC0003DMT400013738	PGSC0003DMB000000022:261497-267026	137431	276430	0	0	209274	2405429	960054	1390388	169187	175925	0	0	0	0	0	0
XLOC_004564|PGSC0003DMT400013730	PGSC0003DMB000000022:277099-277795	0	0	0	0	40978	149399	455537	207417	511887	564024	185619	43311	445079	673474	0	0
XLOC_004570|PGSC0003DMT400062819	PGSC0003DMB000000022:545513-549897	0	0	0	0	0	0	0	0	0	0	0	0	0	0	0	0
XLOC_004574|-	PGSC0003DMB000000022:893773-903877	0	0	0	0	0	0	0	0	0	0	0	0	0	0	0	0
XLOC_004598|PGSC0003DMT400013068	PGSC0003DMB000000022:2675337-2679763	843928	773225	674341	423816	884881	811141	920197	722608	577557	894327	272562	211102	567052	771413	453643	594721
XLOC_004604|-	PGSC0003DMB000000022:1184424-1186066	0	0	0	0	0	0	0	0	0	0	0	0	0	0	0	0
XLOC_004624|-	PGSC0003DMB000000023:1051621-1071405	0	0	0	0	209293	420756	17306	133995	0	0	0	0	0	0	0	0
XLOC_004630|PGSC0003DMT400076840	PGSC0003DMB000000023:1322519-1326220	0	0	0	0	0	0	0	0	0	0	0	0	0	0	0	0
XLOC_004638|PGSC0003DMT400075089,PGSC0003DMT400075090,PGSC0003DMT400075091	PGSC0003DMB000000023:1729768-1731507	0	0	0	0	0	0	0	0	0	0	0	0	0	0	0	0
XLOC_004640|PGSC0003DMT400077180	PGSC0003DMB000000023:1949874-1959035	939943	787671	714824	26,46	123832	608725	114951	427255	527938	132141	189076	586134	70272	894805	209208	52601
XLOC_004650|-	PGSC0003DMB000000023:2999827-3004397	0	0	0	0	0	0	372889	249018	0	0	0	0	0	0	0	0
XLOC_004651|PGSC0003DMT400068885	PGSC0003DMB000000023:3011879-3014358	0	0	0	0	0	0	101512	668198	0	0	0	0	0	0	0	0
XLOC_004681|PGSC0003DMT400010359,PGSC0003DMT400010360	PGSC0003DMB000000023:979206-982229	193281	234061	0	0	760109	142978	0	0	0	0	0	0	0	0	0	0
XLOC_004682|PGSC0003DMT400010354,PGSC0003DMT400010371	PGSC0003DMB000000023:1051621-1071405	0	0	9.25705	207296	615246	245856	0	0	0	0	0	0	0	0	0	0
XLOC_004695|PGSC0003DMT400076843	PGSC0003DMB000000023:1340169-1356818	695738	399704	180,2	1320,65	228401	328105	276552	344141	410901	112226	225016	347328	177394	369402	178051	348378
XLOC_004701|-	PGSC0003DMB000000023:1970173-1982292	0	0	0	0	0	0	0	0	0	0	0	0	0	0	0	0
XLOC_004702|PGSC0003DMT400077184,PGSC0003DMT400077187	PGSC0003DMB000000023:1995187-2002917	667588	543871	34477	629933	598218	524894	474913	60542	597689	35118	29182	25429	599769	532787	39539	439639
XLOC_004708|PGSC0003DMT400068886,PGSC0003DMT400068887,PGSC0003DMT400068888,PGSC0003DMT400068889	PGSC0003DMB000000023:2703138-2712166	960851	19978	41244	281005	170999	148425	333072	173092	177991	1367775	0	0	0	0	0	0
XLOC_004711|PGSC0003DMT400068885	PGSC0003DMB000000023:3011879-3014358	597732	0	708378	0	0	0	0	0	0	0	0	0	134784	0	35541	947758
XLOC_004743|PGSC0003DMT400077367	PGSC0003DMB000000024:2009905-2010864	0	0	0	0	0	0	0	0	0	0	0	0	0	0	0	0
XLOC_004757|PGSC0003DMT400040681,PGSC0003DMT400040682	PGSC0003DMB000000024:893046-895445	0	0	0	0	0	0	0	0	0	0	0	0	0	0	0	0
XLOC_004768|PGSC0003DMT400010824,PGSC0003DMT400010825	PGSC0003DMB000000024:1480216-1484365	344618	771473	43277	0	208383	948691	0	0	1955966	351208	0	0	0	0	0	0
XLOC_004769|-	PGSC0003DMB000000024:1545260-1557342	179543	267554	0	0	173228	198452	19672	931711	946695	459836	0	0	0	0	225373	165374
XLOC_004773|PGSC0003DMT400010820	PGSC0003DMB000000024:1629158-1655889	0	0	0	0	430067	164885	827155	399098	0	0	0	0	0	0	0	0
XLOC_004774|PGSC0003DMT400072128,PGSC0003DMT400072129,PGSC0003DMT400072130	PGSC0003DMB000000024:1739607-1746972	245941	267117	302357	860642	33172	218205	275718	218801	23775	38347	179637	268101	142266	302153	847375	258902
XLOC_004776|PGSC0003DMT400072131,PGSC0003DMT400072132,PGSC0003DMT400072133,PGSC0003DMT400072134	PGSC0003DMB000000024:1803998-1808849	312455	305359	319365	421768	276778	253593	172452	121146	224376	30611	0	0	0	0	0	0
XLOC_004778|PGSC0003DMT400077362,PGSC0003DMT400077363,PGSC0003DMT400077364	PGSC0003DMB000000024:1916847-1923457	612662	73601	16849	264733	447384	517688	35,54	347945	489354	306538	120128	409827	433126	189382	320546	506368
XLOC_004810|-	PGSC0003DMB000000025:1729341-1746676	0	0	0	0	0	0	0	0	0	0	0	0	0	0	0	0
XLOC_004814|PGSC0003DMT400056411,PGSC0003DMT400056412	PGSC0003DMB000000025:2236548-2242477	440644	341492	325271	756585	576684	680066	524571	302341	306647	33084	228987	14082	350667	479404	390388	578453
XLOC_004822|PGSC0003DMT400061974	PGSC0003DMB000000025:2654511-2658032	0	0	0	0	0	0	0	0	0	0	0	0	0	0	0	0
XLOC_004826|PGSC0003DMT400061961	PGSC0003DMB000000025:2785615-2789151	799145	142206	0	0	900303	400058	672604	206996	26123	650797	0	0	0	0	287486	0
XLOC_004838|-	PGSC0003DMB000000025:1193289-1225546	210202	229211	0	0	3145	138217	183895	1696096	0	0	0	0	0	0	248907	149074
XLOC_004843|PGSC0003DMT400027246,PGSC0003DMT400027247,PGSC0003DMT400027248	PGSC0003DMB000000025:1393097-1397031	735341	192609	573068	378714	0	0	0	0	228506	320152	0	0	0	0	0	0
XLOC_004869|PGSC0003DMT400051040,PGSC0003DMT400051041	PGSC0003DMB000000026:37473-44132	184341	248414	0	0	463882	146998	457089	939207	0	0	0	0	0	0	0	0
XLOC_004870|-	PGSC0003DMB000000026:66442-77705	0	0	0	0	0	0	0	0	0	0	0	0	0	0	0	0
XLOC_004872|PGSC0003DMT400036613	PGSC0003DMB000000026:145484-176598	0	0	0	0	0	0	0	0	0	0	0	0	0	0	0	0
XLOC_004873|PGSC0003DMT400036615,PGSC0003DMT400036619	PGSC0003DMB000000026:188335-193331	133407	153742	25784	131762	553048	134823	133419	145726	941115	621492	21169	282253	816723	247125	490679	357183
XLOC_004874|PGSC0003DMT400036620,PGSC0003DMT400036621	PGSC0003DMB000000026:194636-196117	158991	1605577	0	0	20636	429903	2390788	84646	180445	625602	0	0	0	0	0	0
XLOC_004883|PGSC0003DMT400036638	PGSC0003DMB000000026:342396-344560	236566	333975	0	0	2310769	18929	1704558	143632	0	0	0	0	0	0	0	0
XLOC_004887|PGSC0003DMT400036642,PGSC0003DMT400036643	PGSC0003DMB000000026:401853-406374	13902	310394	0	0	0	0	381497	762807	0	0	872579	228698	465278	372775	268844	0
XLOC_004888|PGSC0003DMT400096763	PGSC0003DMB000000026:423033-424768	156455	954841	0	0	1926990	781453	892826	541475	873117	0	30372	10865	399963	363497	508109	0
XLOC_004889|PGSC0003DMT400036644	PGSC0003DMB000000026:426983-432461	150114	326039	0	0	0	0	871299	228174	0	0	0	0	0	0	0	0
XLOC_004890|PGSC0003DMT400036645	PGSC0003DMB000000026:439295-447023	130036	229417	154027	208173	199262	204885	163669	138787	0	0	0	0	0	0	0	0
XLOC_004891|PGSC0003DMT400036646	PGSC0003DMB000000026:476980-479400	0	0	0	0	0	0	0	0	0	0	0	0	300798	138404	0	0
XLOC_004892|PGSC0003DMT400036648	PGSC0003DMB000000026:479817-488900	0	0	0	0	0	0	854769	2206766	0	0	0	0	0	0	0	0
XLOC_004894|PGSC0003DMT400036656,PGSC0003DMT400036657,PGSC0003DMT400036658,PGSC0003DMT400036660	PGSC0003DMB000000026:500163-509371	0	0	123103	0	0	0	0	0	0	0	0	0	0	0	0	0
XLOC_004895|PGSC0003DMT400036661	PGSC0003DMB000000026:538693-546759	354626	295838	0	0	223101	264933	172482	180682	32398	131605	0	0	0	0	0	0
XLOC_004901|PGSC0003DMT400036670,PGSC0003DMT400036671,PGSC0003DMT400036672,PGSC0003DMT400036673,PGSC0003DMT400036674,PGSC0003DMT400036676,PGSC0003DMT400036677	PGSC0003DMB000000026:591014-597322	0	0	0	0	0	0	0	0	0	0	0	0	0	0	0	0
XLOC_004905|PGSC0003DMT400036694	PGSC0003DMB000000026:649044-652496	0	0	0	0	206962	776109	250988	111741	0	0	0	0	0	0	0	0
XLOC_004906|PGSC0003DMT400036695	PGSC0003DMB000000026:672385-676156	0	0	0	0	0	0	0	0	0	0	0	0	0	0	0	0
XLOC_004908|PGSC0003DMT400036700,PGSC0003DMT400036701,PGSC0003DMT400036702,PGSC0003DMT400036703,PGSC0003DMT400036704	PGSC0003DMB000000026:702052-715595	1969268	175526	0	0	5768	168635	911056	101721	191235	155449	0	0	0	0	0	0
XLOC_004909|PGSC0003DMT400036705,PGSC0003DMT400036706	PGSC0003DMB000000026:726079-727892	0	0	0	0	0	0	376282	818465	0	0	0	0	0	0	0	0
XLOC_004912|PGSC0003DMT400036714,PGSC0003DMT400036715	PGSC0003DMB000000026:765802-771068	123094	135536	671717	935978	133041	100546	104397	788598	492306	873681	388757	397512	663915	911389	626973	614273
XLOC_004915|PGSC0003DMT400036881	PGSC0003DMB000000026:821293-830335	0	0	0	0	0	0	0	0	0	0	0	0	0	0	0	0
XLOC_004917|PGSC0003DMT400036723	PGSC0003DMB000000026:858093-861424	0	0	0	0	0	0	0	0	0	0	0	0	0	0	0	0
XLOC_004920|-	PGSC0003DMB000000026:868304-875912	133068	196816	0	0	0	0	372195	769465	0	0	0	0	0	0	0	0
XLOC_004922|-	PGSC0003DMB000000026:908571-913214	0	0	0	0	0	0	859971	0,870145	0	0	0	0	0	0	0	0
XLOC_004923|PGSC0003DMT400036734	PGSC0003DMB000000026:935203-941138	141968	273752	0	0	191699	958642	991908	152017	17062	135697	0	0	0	0	0	0
XLOC_004925|PGSC0003DMT400036737,PGSC0003DMT400036738	PGSC0003DMB000000026:1036780-1046441	166969	1524798	0	0	330143	120864	960437	716494	80366	20575	0	0	0	0	0	0
XLOC_004926|PGSC0003DMT400036743	PGSC0003DMB000000026:1066978-1070438	317744	141657	990951	260844	300899	376124	378942	374905	238537	273072	0	0	0	0	0	0
XLOC_004927|PGSC0003DMT400036744	PGSC0003DMB000000026:1070727-1071942	0	0	0	0	0	0	0	0	0	0	0	0	0	0	0	0
XLOC_004930|PGSC0003DMT400036750,PGSC0003DMT400036752,PGSC0003DMT400036753,PGSC0003DMT400036754	PGSC0003DMB000000026:1122310-1131272	0	0	0	0	0	0	0	0	0	0	0	0	0	0	0	0
XLOC_004932|PGSC0003DMT400036762	PGSC0003DMB000000026:1183562-1199230	0	0	0	0	0	0	0	0	0	0	0	0	0	0	0	0
XLOC_004933|PGSC0003DMT400036763,PGSC0003DMT400036764	PGSC0003DMB000000026:1200064-1202379	189826	30932	0	0	303555	18,33	13788	401738	0	0	366541	220133	0	0	0	0
XLOC_004934|PGSC0003DMT400036765,PGSC0003DMT400036770	PGSC0003DMB000000026:1242205-1248487	295555	422281	240543	694266	661322	329592	221145	18294	226253	23258	0	0	160591	37612	135507	225845
XLOC_004935|PGSC0003DMT400036771	PGSC0003DMB000000026:1265349-1267518	0	0	0	0	0	0	717277	826505	0	0	0	0	0	0	0	0
XLOC_004936|PGSC0003DMT400036773,PGSC0003DMT400036774	PGSC0003DMB000000026:1323529-1327743	254737	202621	0	0	184422	292221	951906	139558	258709	162642	0	0	0	0	0	0
XLOC_004938|PGSC0003DMT400036776,PGSC0003DMT400036777,PGSC0003DMT400036778	PGSC0003DMB000000026:1356056-1358386	527182	675027	644512	118921	499329	694435	151402	263515	851295	2083619	347045	0	0	0	761293	143719
XLOC_004939|PGSC0003DMT400036779,PGSC0003DMT400036780,PGSC0003DMT400036782,PGSC0003DMT400036784	PGSC0003DMB000000026:1361275-1367223	0	0	239159	564683	0	0	0	0	0	0	0	0	0	0	0	0
XLOC_004940|PGSC0003DMT400036785,PGSC0003DMT400036786,PGSC0003DMT400036787	PGSC0003DMB000000026:1368501-1374860	156447	159515	0	0	155861	132759	711032	728896	0	0	0	0	0	0	0	0
XLOC_004942|PGSC0003DMT400036790	PGSC0003DMB000000026:1421001-1424115	23853	444508	21484	688291	211289	420927	260239	392141	408278	218115	0	0	688469	971516	317697	121027
XLOC_004944|PGSC0003DMT400014772,PGSC0003DMT400014773,PGSC0003DMT400014774,PGSC0003DMT400014775	PGSC0003DMB000000026:1426188-1430738	672172	459204	498085	171148	478763	471365	348123	258549	566746	520235	0	0	435477	31155	323855	303734
XLOC_004945|PGSC0003DMT400014771	PGSC0003DMB000000026:1475094-1478317	197559	159376	0	0	1930978	179034	138166	184537	0	0	0	0	0	0	0	0
XLOC_004946|PGSC0003DMT400014770	PGSC0003DMB000000026:1510300-1513992	23453	0	0	0	231859	289824	0	0	0	0	0	0	0	0	0	0
XLOC_004948|-	PGSC0003DMB000000026:1547521-1560639	0	0	0	0	0	0	0	0	0	0	0	0	0	0	0	0
XLOC_004949|-	PGSC0003DMB000000026:1561301-1563242	0	0	0	0	0	0	0	0	0	0	0	0	0	0	0	0
XLOC_004950|PGSC0003DMT400014761,PGSC0003DMT400014762	PGSC0003DMB000000026:1563777-1566137	455198	467354	232433	161512	450994	438499	320127	376869	399995	31826	0	0	326593	289452	295461	656136
XLOC_004952|PGSC0003DMT400014473	PGSC0003DMB000000026:1572770-1588535	305229	178869	0	0	2164154	229161	1375110	199039	291242	658266	0	0	0	0	0	0
XLOC_004953|PGSC0003DMT400014757	PGSC0003DMB000000026:1589741-1598605	144423	218994	0	0	244309	254489	139162	13,99	0	0	0	0	0	0	0	0
XLOC_004954|-	PGSC0003DMB000000026:1604816-1615170	368156	327383	1132892	850624	27049	38,93	268973	382132	250514	23764	0	0	696731	156398	302775	280968
XLOC_004959|PGSC0003DMT400014743,PGSC0003DMT400014744	PGSC0003DMB000000026:1678229-1682534	670125	675756	782825	261308	795132	670775	622651	49182	583436	781769	192058	312099	345389	533989	271276	789318
XLOC_004960|PGSC0003DMT400014742	PGSC0003DMB000000026:1684593-1685413	0	0	0	0	0	0	0	0	0	0	0	0	0	0	0	0
XLOC_004961|PGSC0003DMT400014740,PGSC0003DMT400014741	PGSC0003DMB000000026:1689944-1692433	0	0	0	0	0	0	0	0	177957	469778	0	0	0	0	0	0
XLOC_004962|PGSC0003DMT400014736,PGSC0003DMT400014737,PGSC0003DMT400014738,PGSC0003DMT400014739	PGSC0003DMB000000026:1694211-1700616	234415	159192	0	0	184931	213098	992242	359775	162942	224455	0	0	0	0	0	0
XLOC_004964|PGSC0003DMT400014731,PGSC0003DMT400014732,PGSC0003DMT400014733	PGSC0003DMB000000026:1720154-1723573	361549	150281	371928	0	417581	229476	2809752	269564	27586	205189	0	0	0	0	159865	304699
XLOC_004965|PGSC0003DMT400014727,PGSC0003DMT400014728,PGSC0003DMT400014729	PGSC0003DMB000000026:1774887-1781907	194805	193305	207453	121486	23611	2492324	0	0	898266	229064	0	0	0	0	0	0
XLOC_004967|-	PGSC0003DMB000000026:1794460-1795059	0	0	0	0	0	0	0	0	0	0	0	0	0	0	0	0
XLOC_004968|PGSC0003DMT400014716,PGSC0003DMT400014717	PGSC0003DMB000000026:1796787-1802055	0	0	0	0	0	0	0	0	0	0	0	0	0	0	0	0
XLOC_004970|PGSC0003DMT400014712,PGSC0003DMT400014713,PGSC0003DMT400014714,PGSC0003DMT400014715	PGSC0003DMB000000026:1894972-1901570	528055	594227	109496	161623	547702	60759	353928	244794	385066	914892	190343	204562	280151	396797	229751	657568
XLOC_004973|PGSC0003DMT400014700	PGSC0003DMB000000026:1975991-1981409	350663	273388	241901	81634	456361	33,05	320644	20044	332544	299114	0	0	2234495	335417	230286	448124
XLOC_004974|PGSC0003DMT400014695,PGSC0003DMT400014698	PGSC0003DMB000000026:1985886-2001060	0	0	0	0	0	0	0	0	0	0	0	0	0	0	0	0
XLOC_004976|PGSC0003DMT400014692	PGSC0003DMB000000026:2005422-2009256	151178	213428	0	0	523098	190713	158593	282427	204201	411426	0	0	0	0	0	0
XLOC_004977|PGSC0003DMT400014687,PGSC0003DMT400014688	PGSC0003DMB000000026:2016322-2022277	2952561	201291	19551	146201	269844	149192	169916	216425	2097894	197663	0	0	0	0	0	0
XLOC_004978|PGSC0003DMT400014686	PGSC0003DMB000000026:2025596-2026358	183544	182909	48622	172612	134489	227884	104202	191615	226801	846225	119132	105594	973827	148637	177183	684764
XLOC_004980|PGSC0003DMT400014678,PGSC0003DMT400014679,PGSC0003DMT400014680,PGSC0003DMT400014681,PGSC0003DMT400014682,PGSC0003DMT400014683	PGSC0003DMB000000026:2042364-2050388	0	0	0	214298	0	0	0	0	0	0	0	0	0	0	0	0
XLOC_004981|PGSC0003DMT400014674	PGSC0003DMB000000026:2084533-2094635	2303494	287249	269257	132048	202061	264896	160012	10654	0	0	0	0	0	0	0	0
XLOC_004982|-	PGSC0003DMB000000026:2096340-2108739	180641	967472	167155	191923	519409	2811973	0	0	0	0	0	0	0	0	0	0
XLOC_004983|PGSC0003DMT400014667,PGSC0003DMT400014668,PGSC0003DMT400014669,PGSC0003DMT400014670	PGSC0003DMB000000026:2135505-2138449	0	0	0	0	0	0	0	0	0	0	0	0	0	0	0	0
XLOC_004985|PGSC0003DMT400014656,PGSC0003DMT400014657	PGSC0003DMB000000026:2180923-2182589	78441	275298	0	0	23527	361466	90782	447341	0	0	0	0	0	0	0	0
XLOC_004986|PGSC0003DMT400014653,PGSC0003DMT400014654	PGSC0003DMB000000026:2206224-2213131	267025	204322	179926	13227	264552	285601	265697	249256	141665	302789	340244	243852	0	0	2347719	24382
XLOC_004987|PGSC0003DMT400014649,PGSC0003DMT400014650,PGSC0003DMT400014651	PGSC0003DMB000000026:2216125-2221132	749245	784119	322485	915601	553187	758915	406863	527373	682568	744228	619096	165026	348767	291311	448983	323124
XLOC_004988|PGSC0003DMT400014645,PGSC0003DMT400014646,PGSC0003DMT400014647,PGSC0003DMT400014648	PGSC0003DMB000000026:2232740-2241843	0	0	0	0	0	0	0	0	0	0	0	0	0	0	0	0
XLOC_004989|PGSC0003DMT400014640,PGSC0003DMT400014641,PGSC0003DMT400014643,PGSC0003DMT400014644	PGSC0003DMB000000026:2242403-2250447	449839	162428	0	0	186021	17718	176952	878987	225516	137979	493573	211051	0	0	0	0
XLOC_004990|PGSC0003DMT400014368	PGSC0003DMB000000026:2250561-2254367	105891	686191	740604	203068	696749	810871	91052	502658	720298	102042	478851	783578	391434	618055	578006	42422
XLOC_004991|PGSC0003DMT400014634,PGSC0003DMT400014635,PGSC0003DMT400014636	PGSC0003DMB000000026:2261454-2266436	43452	385556	52276	2185979	338652	403018	775351	2549334	341501	562958	0	0	0	0	2223506	258508
XLOC_004992|PGSC0003DMT400014637	PGSC0003DMB000000026:2266879-2270313	0	0	0	0	189765	329032	0	0	177191	223879	0	0	0	0	374017	434797
XLOC_004993|PGSC0003DMT400014633	PGSC0003DMB000000026:2280396-2281899	273802	34973	231775	686352	144364	372189	131306	462792	43957	319346	0	0	47,04	139263	294592	248078
XLOC_004994|PGSC0003DMT400014629,PGSC0003DMT400014630	PGSC0003DMB000000026:2289210-2290366	890169	1040,42	112886	814915	121309	677138	54388	580765	687239	127464	341753	257575	555856	124606	491833	158874
XLOC_004995|PGSC0003DMT400014621,PGSC0003DMT400014622,PGSC0003DMT400014623,PGSC0003DMT400014624,PGSC0003DMT400014625,PGSC0003DMT400014626,PGSC0003DMT400014627	PGSC0003DMB000000026:2306840-2312533	713802	175669	200884	260575	156982	101157	414179	884436	0	0	0	0	0	0	0	0
XLOC_004996|PGSC0003DMT400014779	PGSC0003DMB000000026:2336163-2336747	0	0	0	0	0	0	0	0	0	0	0	0	0	0	0	0
XLOC_004997|PGSC0003DMT400014620	PGSC0003DMB000000026:2342050-2344344	656972	718057	115532	467134	129,06	120994	840215	653259	778195	181,5	143494	239157	124248	140848	730861	179,06
XLOC_004998|PGSC0003DMT400014619	PGSC0003DMB000000026:2362355-2363895	454381	70316	207112	170366	119731	370379	583001	236701	543871	584998	0	0	15763	974814	197434	27,71
XLOC_004999|PGSC0003DMT400014616,PGSC0003DMT400014617	PGSC0003DMB000000026:2368459-2369609	0	0	0	0	0	0	0	0	0	0	0	0	0	0	0	0
XLOC_005000|PGSC0003DMT400014613,PGSC0003DMT400014614	PGSC0003DMB000000026:2373144-2377493	856247	135991	0	0	0	0	720601	11997	0	0	0	0	0	0	0	0
XLOC_005001|-	PGSC0003DMB000000026:2383010-2404475	301122	248524	298549	244656	411651	481931	290641	238442	162756	340161	264952	270315	291181	352719	2457292	362927
XLOC_005002|PGSC0003DMT400014602,PGSC0003DMT400014603,PGSC0003DMT400014605,PGSC0003DMT400014606,PGSC0003DMT400014607,PGSC0003DMT400014608,PGSC0003DMT400014609	PGSC0003DMB000000026:2412540-2417509	0	0	0	0	0	0	595074	1294025	0	0	0	0	0	0	0	0
XLOC_005004|PGSC0003DMT400014589,PGSC0003DMT400014592,PGSC0003DMT400014593	PGSC0003DMB000000026:2461794-2465109	457839	268029	0	0	24066	205568	265471	19185	225972	206666	0	0	0	0	357759	100754
XLOC_005006|-	PGSC0003DMB000000026:2473732-2485845	0	0	0	0	0	0	0	0	0	0	0	0	0	0	0	0
XLOC_005007|PGSC0003DMT400014582	PGSC0003DMB000000026:2488140-2502471	0	0	0	0	178223	10867	851869	120501	0	0	0	0	0	0	0	0
XLOC_005011|PGSC0003DMT400014568,PGSC0003DMT400014569,PGSC0003DMT400014570	PGSC0003DMB000000026:2577550-2586246	594366	736748	542651	52817	552327	628465	48745	427709	541356	626732	253296	329315	303679	455518	247572	404128
XLOC_005013|PGSC0003DMT400014566	PGSC0003DMB000000026:2621124-2621896	275505	897571	0	0	263986	2956548	222321	13857	0	0	0	0	0	0	151213	336028
XLOC_005016|PGSC0003DMT400014556,PGSC0003DMT400014559,PGSC0003DMT400014560,PGSC0003DMT400014561	PGSC0003DMB000000026:2669441-2678626	347867	352606	231067	430807	184716	168351	153322	136714	1214768	189059	0	0	0	0	11009	274112
XLOC_005021|PGSC0003DMT400014546,PGSC0003DMT400014547	PGSC0003DMB000000026:2804790-2809825	121134	153627	381673	178915	0	0	0	0	0	0	0	0	0	0	0	0
XLOC_005024|PGSC0003DMT400014536,PGSC0003DMT400014537,PGSC0003DMT400014538,PGSC0003DMT400014539,PGSC0003DMT400014540	PGSC0003DMB000000026:2833773-2839812	191722	218396	0	0	568125	172155	2909858	209226	173449	905068	0	0	0	0	0	0
XLOC_005025|PGSC0003DMT400014295,PGSC0003DMT400014535	PGSC0003DMB000000026:2842190-2845045	239358	382973	189109	321487	213494	174844	270071	173896	227607	217134	213421	1760074	35982	132563	0	0
XLOC_005027|PGSC0003DMT400014526,PGSC0003DMT400014529	PGSC0003DMB000000026:2856694-2859965	628676	160975	0	0	725105	297933	0	0	434425	188202	0	0	0	0	372074	199365
XLOC_005029|-	PGSC0003DMB000000026:2866904-2875984	156936	377206	0	0	185056	176304	34274	896277	0	0	0	0	0	0	0	0
XLOC_005030|PGSC0003DMT400014519	PGSC0003DMB000000026:2876563-2879487	326322	187688	0	0	0	0	136931	903147	0	0	0	0	0	0	344941	383268
XLOC_005031|PGSC0003DMT400014518	PGSC0003DMB000000026:2883710-2884318	903306	19129	0	0	0	0	758092	421882	0	0	0	0	0	0	268553	0
XLOC_005032|PGSC0003DMT400014516,PGSC0003DMT400014517	PGSC0003DMB000000026:2889977-2892187	208877	110478	0	0	131106	343407	465972	162999	246846	144675	0	0	0	0	0	0
XLOC_005033|PGSC0003DMT400014514,PGSC0003DMT400014515	PGSC0003DMB000000026:2907689-2909038	0	0	0	0	0	0	0	0	0	0	0	0	0	0	0	0
XLOC_005038|PGSC0003DMT400051046,PGSC0003DMT400051047,PGSC0003DMT400051048	PGSC0003DMB000000026:44766-47867	0	19177	0	0	0	224484	0	691346	31625	0	0	0	0	0	0	0
XLOC_005039|PGSC0003DMT400051049	PGSC0003DMB000000026:81977-84708	0	0	0	0	0	0	0	0	0	0	0	0	0	0	0	0
XLOC_005041|PGSC0003DMT400051062	PGSC0003DMB000000026:107132-111671	0	0	0	0	0	0	0	0	0	0	0	0	0	0	0	0
XLOC_005043|PGSC0003DMT400051067,PGSC0003DMT400051070	PGSC0003DMB000000026:130438-138034	0	0	0	0	147704	222004	0	0	0	0	0	0	0	0	0	0
XLOC_005044|PGSC0003DMT400051072	PGSC0003DMB000000026:145484-176598	54492	242357	440058	409863	329314	674974	939183	213729	406708	157747	0	0	0	0	0	0
XLOC_005045|PGSC0003DMT400051073	PGSC0003DMB000000026:145484-176598	0	0	0	0	0	0	0	0	0	0	0	0	0	0	0	0
XLOC_005046|PGSC0003DMT400051074	PGSC0003DMB000000026:145484-176598	0	0	0	0	0	0	182233	173251	0	0	0	0	0	0	0	0
XLOC_005047|PGSC0003DMT400036797,PGSC0003DMT400036798,PGSC0003DMT400036803	PGSC0003DMB000000026:199739-214775	740606	866019	44,12	559501	809399	769705	468127	658045	641087	712148	313931	692179	669513	775344	347236	240467
XLOC_005049|PGSC0003DMT400036807	PGSC0003DMB000000026:231458-235703	642063	976168	819446	722208	854472	758344	642468	588207	592399	58469	0	0	501161	498231	425818	548179
XLOC_005051|PGSC0003DMT400036810	PGSC0003DMB000000026:259940-266010	0	0	0	0	0	0	182745	101699	0	0	0	0	0	0	0	0
XLOC_005052|PGSC0003DMT400036813,PGSC0003DMT400036814	PGSC0003DMB000000026:287002-292909	502437	536318	406643	764566	288336	445226	390812	304551	254246	500255	399507	768264	0	0	335179	233166
XLOC_005053|PGSC0003DMT400036815,PGSC0003DMT400036816	PGSC0003DMB000000026:294064-302520	236633	246101	177111	669693	898956	190801	155638	138523	0	0	0	0	0	0	0	0
XLOC_005054|PGSC0003DMT400036818,PGSC0003DMT400036819,PGSC0003DMT400036820,PGSC0003DMT400036821,PGSC0003DMT400036822,PGSC0003DMT400036823,PGSC0003DMT400036824	PGSC0003DMB000000026:322042-329101	0	0	0	0	570659	165395	0	0	0	0	0	0	0	0	0	0
XLOC_005055|PGSC0003DMT400036825,PGSC0003DMT400036826,PGSC0003DMT400036827	PGSC0003DMB000000026:346227-352204	0	0	0	0	0	0	0	0	0	0	0	0	0	0	0	0
XLOC_005059|PGSC0003DMT400036835	PGSC0003DMB000000026:434339-438760	220159	259011	0	0	0	0	466751	162804	1883100	209704	0	0	0	0	0	0
XLOC_005061|PGSC0003DMT400036836	PGSC0003DMB000000026:452360-454527	0	0	0	0	0	0	0	0	0	0	0	0	0	0	0	0
XLOC_005064|-	PGSC0003DMB000000026:513204-526935	185399	188574	136506	208279	180949	251169	104652	140838	180,12	152683	125937	565898	83272	152719	160114	102,97
XLOC_005065|PGSC0003DMT400036842,PGSC0003DMT400036843	PGSC0003DMB000000026:554396-555097	0	0	0	0	0	0	0	0	0	0	0	0	0	0	0	0
XLOC_005066|PGSC0003DMT400036844,PGSC0003DMT400036845	PGSC0003DMB000000026:555546-559780	45322	261596	18799	339239	172502	343045	313797	148171	326256	206346	0	0	357691	174811	242534	273511
XLOC_005067|PGSC0003DMT400036847	PGSC0003DMB000000026:560767-565641	169067	229675	264629	479782	293285	224,3	261401	214536	915912	303597	514258	137707	170578	334774	991714	140177
XLOC_005069|PGSC0003DMT400036851,PGSC0003DMT400036852	PGSC0003DMB000000026:652851-654284	494152	357779	150169	506109	0	257913	303836	269426	377642	2313387	180598	18158	212255	422928	254014	172213
XLOC_005074|PGSC0003DMT400036855,PGSC0003DMT400036856	PGSC0003DMB000000026:679978-682164	403,74	302411	35499	846169	859344	249332	207656	153859	517,65	226345	446576	149359	155944	605617	976457	170947
XLOC_005075|PGSC0003DMT400036857	PGSC0003DMB000000026:691655-693588	0	0	0	0	0	0	0	0	0	0	0	0	0	0	0	0
XLOC_005076|PGSC0003DMT400036858,PGSC0003DMT400036859,PGSC0003DMT400036860	PGSC0003DMB000000026:715671-719481	503478	113147	307049	215312	219664	136989	160945	134026	103863	315177	468296	290208	596454	300055	139191	372903
XLOC_005078|PGSC0003DMT400036864,PGSC0003DMT400036865,PGSC0003DMT400036866	PGSC0003DMB000000026:755432-760288	318097	161677	0	0	0	0	0	0	0	0	0	0	0	0	0	0
XLOC_005079|PGSC0003DMT400036867,PGSC0003DMT400036868,PGSC0003DMT400036869	PGSC0003DMB000000026:760368-763523	205258	175118	0	0	0	0	130126	10808	0	0	0	0	0	0	0	0
XLOC_005080|PGSC0003DMT400036870,PGSC0003DMT400036871	PGSC0003DMB000000026:771577-776294	239968	250947	0	0	369025	195422	156637	157735	195919	388894	0	0	0	0	0	0
XLOC_005083|PGSC0003DMT400036875	PGSC0003DMB000000026:792223-799340	0	0	0	0	0	0	0	0	0	0	0	0	0	0	0	0
XLOC_005085|PGSC0003DMT400036876	PGSC0003DMB000000026:810186-813320	0	0	0	0	0	0	0	0	0	0	0	0	0	0	0	0
XLOC_005086|PGSC0003DMT400036877,PGSC0003DMT400036878,PGSC0003DMT400036879,PGSC0003DMT400036880,PGSC0003DMT400036881	PGSC0003DMB000000026:821293-830335	439862	356609	1827583	666912	184543	373708	1864473	237445	250695	522427	0	0	0	0	279005	0
XLOC_005087|PGSC0003DMT400036884,PGSC0003DMT400036885	PGSC0003DMB000000026:831189-832059	0	0	0	0	0	0	0	0	0	0	0	0	0	0	0	0
XLOC_005088|PGSC0003DMT400036886,PGSC0003DMT400036887	PGSC0003DMB000000026:834454-837709	0	0	0	0	0	0	0	0	0	0	0	0	0	0	0	0
XLOC_005089|PGSC0003DMT400036888,PGSC0003DMT400036889,PGSC0003DMT400036890	PGSC0003DMB000000026:849217-852452	255828	416983	194883	176904	21,75	266125	397355	296214	0	0	0	0	444011	14871	0	0
XLOC_005090|PGSC0003DMT400036891,PGSC0003DMT400036892,PGSC0003DMT400036893	PGSC0003DMB000000026:877868-888779	0	0	0	0	0	0	0	0	0	0	0	0	0	0	0	0
XLOC_005093|PGSC0003DMT400036899,PGSC0003DMT400036900	PGSC0003DMB000000026:950166-953054	0	0	0	0	0	0	0	0	0	0	0	0	0	0	0	0
XLOC_005094|PGSC0003DMT400036907	PGSC0003DMB000000026:954957-975946	188246	157174	126392	401366	153742	157377	130363	957375	918697	167,51	476705	125319	153186	119195	56,11	114492
XLOC_005095|PGSC0003DMT400036916,PGSC0003DMT400036917,PGSC0003DMT400036918	PGSC0003DMB000000026:981268-987920	0	0	0	0	0	0	0	0	0	0	0	0	0	0	0	0
XLOC_005098|PGSC0003DMT400036920	PGSC0003DMB000000026:1000871-1004330	201572	200188	934438	979409	170736	200769	196917	154429	155012	153669	366761	198529	157723	127536	114182	705763
XLOC_005100|PGSC0003DMT400036922,PGSC0003DMT400036923,PGSC0003DMT400036924,PGSC0003DMT400036925	PGSC0003DMB000000026:1030474-1031578	229891	191106	896538	1642,98	246937	109398	115954	894246	130641	355259	710631	409227	134626	184948	82798	0
XLOC_005102|PGSC0003DMT400036927,PGSC0003DMT400036928	PGSC0003DMB000000026:1050917-1055160	0	0	0	0	0	0	0	0	0	0	0	0	0	0	0	0
XLOC_005104|PGSC0003DMT400036930	PGSC0003DMB000000026:1073500-1076087	273829	193291	0	381344	81213	304549	574518	2187774	0	0	0	0	0	0	0	0
XLOC_005105|PGSC0003DMT400036931,PGSC0003DMT400036932	PGSC0003DMB000000026:1104663-1110653	320069	440276	282055	288017	371373	395077	261727	283639	303293	241215	0	0	462647	355508	234229	169165
XLOC_005106|PGSC0003DMT400036933,PGSC0003DMT400036934	PGSC0003DMB000000026:1136748-1138959	0	0	0	0	0	0	0	0	0	0	0	0	0	0	0	0
XLOC_005107|-	PGSC0003DMB000000026:1139732-1149896	276655	210037	0	0	0	0	121829	661759	241808	1028218	0	0	0	0	277704	158091
XLOC_005109|PGSC0003DMT400036941,PGSC0003DMT400036942	PGSC0003DMB000000026:1164281-1166357	174319	1121662	0	0	172624	193648	135829	142433	0	0	0	0	0	0	0	0
XLOC_005110|PGSC0003DMT400036944,PGSC0003DMT400036948	PGSC0003DMB000000026:1168276-1179258	0	0	0	0	2805915	188452	2943764	2738895	0	0	0	0	0	0	447637	136364
XLOC_005114|PGSC0003DMT400036960,PGSC0003DMT400036961	PGSC0003DMB000000026:1271462-1277806	16416	1425086	0	0	153117	206832	142262	1742847	0	0	0	0	0	0	0	0
XLOC_005115|PGSC0003DMT400036962,PGSC0003DMT400036963,PGSC0003DMT400036964,PGSC0003DMT400036965,PGSC0003DMT400036966	PGSC0003DMB000000026:1278657-1285949	0	0	0	0	0	0	0	0	0	0	0	0	0	0	0	0
XLOC_005117|PGSC0003DMT400036975	PGSC0003DMB000000026:1301474-1303634	262904	185579	0	0	101076	240055	208381	354718	132575	357741	0	0	0	0	0	0
XLOC_005118|-	PGSC0003DMB000000026:1304082-1314508	1122697	148416	0	0	667148	203617	900991	362178	0	0	0	0	0	0	0	0
XLOC_005119|PGSC0003DMT400036979,PGSC0003DMT400036981	PGSC0003DMB000000026:1320173-1321624	198635	0	0	0	0	0	1509609	185541	0	0	249063	0	0	0	0	0
XLOC_005120|PGSC0003DMT400036982	PGSC0003DMB000000026:1328125-1344915	269853	259156	0	0	272763	335568	167592	151112	0	0	12908	203738	0	0	0	0
XLOC_005121|PGSC0003DMT400036993	PGSC0003DMB000000026:1349161-1350126	0	220287	0	258,59	0	35094	0	131176	424897	0	391301	0	0	0	501004	989638
XLOC_005122|-	PGSC0003DMB000000026:1393613-1412712	0	0	0	0	147538	567452	0	0	0	0	0	0	0	0	0	0
XLOC_005126|PGSC0003DMT400014493,PGSC0003DMT400014495,PGSC0003DMT400014496,PGSC0003DMT400014497,PGSC0003DMT400014498,PGSC0003DMT400014499	PGSC0003DMB000000026:1464413-1474963	100987	865155	953643	22348	801959	650752	56669	444839	453793	999802	132697	294127	334721	783601	351227	765762
XLOC_005127|PGSC0003DMT400014487,PGSC0003DMT400014488,PGSC0003DMT400014489,PGSC0003DMT400014490,PGSC0003DMT400014491,PGSC0003DMT400014492	PGSC0003DMB000000026:1478504-1487331	111253	194883	0	0	185715	35365	143987	630371	214503	862644	0	0	0	0	245351	338317
XLOC_005128|PGSC0003DMT400014485,PGSC0003DMT400014486	PGSC0003DMB000000026:1503525-1504659	277897	196163	0	0	192297	192313	233222	12979	198192	907522	0	0	0	0	0	0
XLOC_005130|PGSC0003DMT400014478,PGSC0003DMT400014479,PGSC0003DMT400014480,PGSC0003DMT400014481	PGSC0003DMB000000026:1566546-1571698	0	0	0	0	2580044	160737	2245056	881879	1070709	166657	0	0	0	0	0	0
XLOC_005131|PGSC0003DMT400014472,PGSC0003DMT400014473,PGSC0003DMT400014474,PGSC0003DMT400014476	PGSC0003DMB000000026:1572770-1588535	14126	150805	0	0	139946	140486	2779405	460804	0	0	0	0	0	0	0	0
XLOC_005136|PGSC0003DMT400014451,PGSC0003DMT400014460,PGSC0003DMT400014461	PGSC0003DMB000000026:1701662-1713656	0	0	0	0	0	0	530538	986918	0	0	0	0	0	0	0	0
XLOC_005137|PGSC0003DMT400014446,PGSC0003DMT400014448,PGSC0003DMT400014449	PGSC0003DMB000000026:1723899-1729792	0	0	0	0	0	0	0	0	0	0	0	0	0	0	0	0
XLOC_005138|PGSC0003DMT400014443,PGSC0003DMT400014444	PGSC0003DMB000000026:1730240-1733876	203481	189037	0	0	926429	448727	1561169	234458	342893	546479	0	0	0	0	0	0
XLOC_005140|PGSC0003DMT400014441	PGSC0003DMB000000026:1787154-1789214	83136	758924	896357	280306	908407	697527	76853	724011	810542	847167	329186	509454	845706	823451	364238	773076
XLOC_005144|PGSC0003DMT400014431	PGSC0003DMB000000026:1827827-1830975	774861	46796	519175	550026	101811	181508	663091	430353	298406	485001	529357	381849	301409	83238	194452	535128
XLOC_005145|PGSC0003DMT400014425,PGSC0003DMT400014429,PGSC0003DMT400014430	PGSC0003DMB000000026:1837793-1848097	0	0	763444	749654	2812766	1875491	0	0	0	0	0	0	0	0	0	0
XLOC_005146|PGSC0003DMT400014424	PGSC0003DMB000000026:1863285-1867020	179907	188441	162314	128,99	133336	172694	150011	127933	130,94	210374	494823	756787	162,27	108823	125606	920187
XLOC_005147|PGSC0003DMT400014420,PGSC0003DMT400014421,PGSC0003DMT400014422	PGSC0003DMB000000026:1868464-1875761	305004	412016	233422	376935	486003	35913	212285	180093	293526	292566	0	0	202884	298486	259848	640
XLOC_005148|PGSC0003DMT400014419	PGSC0003DMB000000026:1877307-1879379	181629	178377	115814	44265	183073	153,7	172312	135541	107519	162795	470332	854024	155,81	135894	751273	118952
XLOC_005150|PGSC0003DMT400014414,PGSC0003DMT400014415	PGSC0003DMB000000026:1911652-1914634	149705	140898	0	0	138134	178834	17051	179791	166389	1046695	715095	232406	0	0	262804	226039
XLOC_005151|PGSC0003DMT400014412	PGSC0003DMB000000026:1918315-1924567	343198	505581	212205	252137	31667	486192	306809	357744	386977	178678	174626	318068	448628	336471	372639	20505
XLOC_005152|PGSC0003DMT400014409	PGSC0003DMB000000026:1925986-1927513	0	0	0	693754	0	0	0	0	0	0	0	0	0	0	0	0
XLOC_005161|PGSC0003DMT400014395	PGSC0003DMB000000026:2068627-2071829	0	0	0	0	0	0	387362	898206	0	0	0	0	0	0	0	0
XLOC_005162|PGSC0003DMT400014393	PGSC0003DMB000000026:2072780-2081323	172205	232063	259745	22237	267589	318355	164231	13892	159154	297991	0	0	0	0	0	0
XLOC_005163|PGSC0003DMT400014391	PGSC0003DMB000000026:2111674-2113094	399513	282009	0	0	0	0	670574	298543	0	0	0	0	0	0	0	0
XLOC_005165|PGSC0003DMT400014386,PGSC0003DMT400014387,PGSC0003DMT400014388,PGSC0003DMT400014389	PGSC0003DMB000000026:2123033-2130303	368241	299717	169693	200398	308786	337673	187154	197342	247473	288771	0	0	0	0	0	0
XLOC_005166|PGSC0003DMT400014384	PGSC0003DMB000000026:2144133-2167568	514059	499743	420583	442,83	651,36	490926	546085	499069	377638	384389	258843	173283	453222	621,2	454882	476,58
XLOC_005167|PGSC0003DMT400014382,PGSC0003DMT400014383	PGSC0003DMB000000026:2144133-2167568	0	0	178809	397151	0	0	0	0	776536	0	291901	0	0	0	415263	0
XLOC_005168|-	PGSC0003DMB000000026:2144133-2167568	0	0	0	0	0	0	0	0	0	0	0	0	0	0	0	0
XLOC_005169|PGSC0003DMT400014374,PGSC0003DMT400014375,PGSC0003DMT400014376,PGSC0003DMT400014380,PGSC0003DMT400014381	PGSC0003DMB000000026:2144133-2167568	383549	329203	497377	617482	562665	259433	233553	32,11	256436	183669	460021	399517	0	0	644959	512849
XLOC_005171|PGSC0003DMT400014372	PGSC0003DMB000000026:2200563-2202108	0	0	0	0	0	0	620959	894411	0	0	0	0	0	0	0	0
XLOC_005174|PGSC0003DMT400014369	PGSC0003DMB000000026:2221289-2224636	0	0	483827	250967	395905	253626	7802	120236	204004	934158	0	0	0	0	0	0
XLOC_005175|PGSC0003DMT400014367	PGSC0003DMB000000026:2250561-2254367	727412	759936	53448	2094637	60407	748795	692889	672673	575375	605768	199676	665824	75452	707901	361255	553621
XLOC_005182|PGSC0003DMT400014615	PGSC0003DMB000000026:2368459-2369609	0	136144	0	0	0	291968	0	0	375139	0	0	0	0	0	688075	0
XLOC_005183|PGSC0003DMT400014354	PGSC0003DMB000000026:2408952-2411198	0	0	0	0	0	0	0	0	16966	0	0	0	0	0	0	0
XLOC_005184|PGSC0003DMT400014352	PGSC0003DMB000000026:2423317-2425192	18779	186562	0	0	0	0	239319	561714	0	0	0	0	313667	700141	0	0
XLOC_005185|PGSC0003DMT400014351	PGSC0003DMB000000026:2430625-2435655	265857	254852	262558	255971	281649	350642	269945	236,07	185136	276,01	115233	102886	229433	268776	185399	192555
XLOC_005189|PGSC0003DMT400014349,PGSC0003DMT400014350	PGSC0003DMB000000026:2488140-2502471	284786	415917	209484	382907	18512	186886	152468	229322	0	0	0	0	0	0	0	0
XLOC_005190|PGSC0003DMT400014344,PGSC0003DMT400014345,PGSC0003DMT400014346,PGSC0003DMT400014347,PGSC0003DMT400014348	PGSC0003DMB000000026:2505390-2511573	0	0	0	0	0	0	0	0	0	0	0	0	0	0	0	0
XLOC_005191|PGSC0003DMT400014343	PGSC0003DMB000000026:2512399-2526081	0	0	0	0	0	0	732723	2339776	0	0	0	0	0	0	0	0
XLOC_005193|PGSC0003DMT400014328	PGSC0003DMB000000026:2555856-2571198	144341	148358	178842	639689	152315	223599	689121	889964	0	0	0	0	0	0	0	0
XLOC_005198|-	PGSC0003DMB000000026:2637521-2643537	0	0	0	0	0	0	0	0	0	0	0	0	0	0	0	0
XLOC_005199|PGSC0003DMT400014311,PGSC0003DMT400014312,PGSC0003DMT400014313	PGSC0003DMB000000026:2645650-2652757	270325	254457	16959	240458	384414	307147	191282	203045	247825	250817	0	0	0	0	0	0
XLOC_005202|PGSC0003DMT400014777	PGSC0003DMB000000026:2712723-2714720	405025	219358	0	0	1439847	459226	624831	151184	0	0	0	0	0	0	0	0
XLOC_005205|PGSC0003DMT400014304	PGSC0003DMB000000026:2735804-2739579	164872	201726	0	0	19016	175898	110694	10267	121147	188451	0	0	0	0	0	0
XLOC_005206|PGSC0003DMT400014303	PGSC0003DMB000000026:2746623-2749831	0	0	0	0	0	0	0	0	0	0	0	0	0	0	0	0
XLOC_005207|PGSC0003DMT400014300,PGSC0003DMT400014301,PGSC0003DMT400014302	PGSC0003DMB000000026:2764008-2775631	352947	278689	441704	80294	328157	304436	146483	23496	14037	380046	0	0	16005	269557	0	0
XLOC_005208|PGSC0003DMT400014299	PGSC0003DMB000000026:2776396-2781138	144117	139653	123348	105295	180826	103789	147582	109087	104425	209215	618598	51681	886601	148266	791788	107363
XLOC_005210|PGSC0003DMT400014547	PGSC0003DMB000000026:2804790-2809825	0	0	0	0	0	0	0	0	0	0	234891	0	0	0	0	0
XLOC_005213|PGSC0003DMT400014291	PGSC0003DMB000000026:2880848-2881385	902027	318362	445416	161212	0	120294	157712	161492	731034	0	150804	471262	0	0	286048	2661828
XLOC_005216|-	PGSC0003DMB000000026:1772130-1772820	127483	119984	207367	302163	553549	103791	209782	443631	103722	408165	131,64	313428	0	0	0	0
XLOC_005217|-	PGSC0003DMB000000026:1858364-1859283	0	0	0	0	0	0	0	0	0	0	0	0	0	0	0	0
XLOC_005218|-	PGSC0003DMB000000026:2356034-2357152	0	0	0	0	0	0	0	0	0	0	0	0	0	0	0	0
XLOC_005219|-	PGSC0003DMB000000026:2360903-2361712	0	0	0	0	0	0	0	0	0	0	0	0	0	0	0	0
XLOC_005226|-	PGSC0003DMB000000027:215921-230971	525364	530292	350562	198929	579592	295438	370773	174769	384122	715986	148251	298875	296027	495761	190698	285289
XLOC_005228|PGSC0003DMT400026609,PGSC0003DMT400026610	PGSC0003DMB000000027:309957-318097	146333	224551	136304	223281	141506	176115	133487	101472	140249	270109	0	0	0	0	0	0
XLOC_005238|PGSC0003DMT400026594	PGSC0003DMB000000027:689514-704392	456521	214833	631198	296692	1245022	197453	51084	426429	394646	372721	0	0	686278	42539	180963	723854
XLOC_005249|PGSC0003DMT400003152	PGSC0003DMB000000027:998369-1003561	137156	211235	147768	850856	155316	194146	146499	174702	242522	610796	0	0	0	0	0	0
XLOC_005250|PGSC0003DMT400003146,PGSC0003DMT400003147,PGSC0003DMT400003150,PGSC0003DMT400003151	PGSC0003DMB000000027:1005901-1018788	15,56	194388	0	0	152587	145482	2576027	914509	0	0	0	0	0	0	0	0
XLOC_005262|PGSC0003DMT400045045,PGSC0003DMT400045046,PGSC0003DMT400045047,PGSC0003DMT400045048,PGSC0003DMT400045049,PGSC0003DMT400045050	PGSC0003DMB000000027:1362102-1368854	0	0	0	0	193868	187482	183198	608596	0	0	0	0	0	0	0	0
XLOC_005276|PGSC0003DMT400045008	PGSC0003DMB000000027:1894615-1904176	0	0	448785	358615	0	0	476713	111171	0	0	0	0	0	0	0	0
XLOC_005277|PGSC0003DMT400045006	PGSC0003DMB000000027:1929501-1932083	0	0	0	0	0	0	0	0	0	0	0	0	0	0	0	0
XLOC_005278|PGSC0003DMT400045004	PGSC0003DMB000000027:1960121-1962920	129222	100043	576342	379271	115388	135821	553903	111619	756732	544526	139379	365871	814627	105539	115666	616883
XLOC_005280|PGSC0003DMT400031252,PGSC0003DMT400031253	PGSC0003DMB000000027:2024781-2027588	0	0	0	181275	221512	13845	2688857	270447	0	0	0	0	902176	386019	289187	634381
XLOC_005282|-	PGSC0003DMB000000027:2109850-2114242	142445	281539	0	0	394304	36966	179318	532223	0	0	0	0	0	0	0	0
XLOC_005284|PGSC0003DMT400027921,PGSC0003DMT400027922,PGSC0003DMT400027923,PGSC0003DMT400027924	PGSC0003DMB000000027:2253881-2260922	198416	209756	369146	280941	286535	177386	139106	643832	848159	234087	0	0	0	0	0	0
XLOC_005285|PGSC0003DMT400027918,PGSC0003DMT400027919,PGSC0003DMT400027920	PGSC0003DMB000000027:2265234-2271691	0	0	0	0	134648	174346	0	0	0	0	0	0	0	0	0	0
XLOC_005286|-	PGSC0003DMB000000027:2284573-2295260	173639	222066	205782	716901	226192	256301	138868	2869682	182775	185566	0	0	0	0	0	0
XLOC_005287|PGSC0003DMT400027911	PGSC0003DMB000000027:2321834-2340728	0	0	0	0	808028	13507	0	0	130362	180471	0	0	0	0	0	0
XLOC_005289|PGSC0003DMT400027905	PGSC0003DMB000000027:2364190-2370195	260195	216319	647555	304918	268093	307607	269318	243044	213683	476795	145001	224752	0	0	110017	28421
XLOC_005290|PGSC0003DMT400027902,PGSC0003DMT400027903,PGSC0003DMT400027904	PGSC0003DMB000000027:2387472-2394887	227685	169178	0	0	147944	310983	135769	13089	0	0	0	0	0	0	0	0
XLOC_005291|PGSC0003DMT400027898,PGSC0003DMT400027900,PGSC0003DMT400027901	PGSC0003DMB000000027:2418287-2421778	717314	54681	531201	319906	591482	576092	287013	372104	419532	525936	0	0	204941	364505	324501	306752
XLOC_005293|PGSC0003DMT400027956	PGSC0003DMB000000027:2556744-2566583	0	0	0	0	0	0	0	0	0	0	0	0	0	0	0	0
XLOC_005298|PGSC0003DMT400046278	PGSC0003DMB000000027:2727753-2731140	188425	399017	195391	413292	293389	264865	20755	880022	0	0	0	0	0	0	0	0
XLOC_005299|PGSC0003DMT400043704	PGSC0003DMB000000027:2742579-2744201	197332	824152	194883	133055	227599	137982	690037	875543	159925	295368	136087	144334	482049	585484	112444	13037
XLOC_005305|PGSC0003DMT400043694,PGSC0003DMT400043695	PGSC0003DMB000000027:2858231-2871395	743405	49996	352939	372507	886916	734959	619325	693382	673832	510825	299267	240894	470413	602096	638824	18229
XLOC_005306|PGSC0003DMT400043689	PGSC0003DMB000000027:2880793-2897090	228472	28555	303384	388526	201063	253703	168831	138368	15891	220422	20282	2820130	0	0	0	0
XLOC_005308|PGSC0003DMT400026591	PGSC0003DMB000000027:153654-161371	525382	2322852	908772	435411	35645	592766	601303	419122	245362	250428	0	0	46,16	487314	364764	2906936
XLOC_005310|PGSC0003DMT400026585	PGSC0003DMB000000027:170953-172530	180229	227658	0	0	919015	180521	147275	18607	0	0	0	0	0	0	0	0
XLOC_005315|PGSC0003DMT400026580,PGSC0003DMT400026581	PGSC0003DMB000000027:281421-289463	491768	150378	0	0	170158	638094	134384	1073389	0	0	0	0	0	0	0	0
XLOC_005316|PGSC0003DMT400026577,PGSC0003DMT400026579	PGSC0003DMB000000027:325342-334184	110578	163208	0	0	1441948	141976	717107	842014	0	0	0	0	0	0	0	0
XLOC_005323|PGSC0003DMT400026570,PGSC0003DMT400026571	PGSC0003DMB000000027:581361-590778	193432	170719	0	0	178481	183988	1810814	677558	0	0	0	0	327128	24381	0	0
XLOC_005324|PGSC0003DMT400026567,PGSC0003DMT400026568,PGSC0003DMT400026569	PGSC0003DMB000000027:659566-665274	212958	413707	216467	281151	252807	365905	221771	314294	274247	32965	0	0	0	0	272538	213402
XLOC_005326|PGSC0003DMT400026563,PGSC0003DMT400026564,PGSC0003DMT400026565	PGSC0003DMB000000027:707058-709634	0	0	0	28652	0	0	0	0	0	0	0	0	0	0	0	0
XLOC_005327|PGSC0003DMT400026625	PGSC0003DMB000000027:783753-784282	0	0	0	0	0	0	0	0	0	0	0	0	0	0	0	0
XLOC_005339|PGSC0003DMT400044985,PGSC0003DMT400044986,PGSC0003DMT400044987,PGSC0003DMT400044988,PGSC0003DMT400044989	PGSC0003DMB000000027:1371734-1384584	306097	232417	341619	831191	211413	182856	31352	287135	190086	277209	0	0	0	0	0	0
XLOC_005347|-	PGSC0003DMB000000027:1565937-1570003	0	0	0	0	371686	728995	180301	167231	0	0	0	0	0	0	0	0
XLOC_005351|PGSC0003DMT400044952	PGSC0003DMB000000027:1691383-1695822	18729	198307	0	0	26,57	218716	188617	662856	0	0	0	0	0	0	0	0
XLOC_005352|PGSC0003DMT400044949,PGSC0003DMT400044950	PGSC0003DMB000000027:1706101-1721465	0	0	0	0	182154	100015	0	0	0	0	0	0	0	0	0	0
XLOC_005353|PGSC0003DMT400044945	PGSC0003DMB000000027:1726560-1738896	0	0	449863	370046	157613	328361	0	0	0	0	0	0	0	0	0	0
XLOC_005354|PGSC0003DMT400044944	PGSC0003DMB000000027:1726560-1738896	1780,08	1982,09	465557	11651,9	978407	3655,4	850655	1166,13	2719,31	713802	5454,08	814732	1309,86	833122	2147,3	649419
XLOC_005358|PGSC0003DMT400044934	PGSC0003DMB000000027:1905082-1906375	0	0	0	0	0	0	0	0	0	0	0	0	0	0	0	0
XLOC_005362|PGSC0003DMT400031265	PGSC0003DMB000000027:2001567-2002282	0	0	0	0	0	0	0	0	0	0	0	0	0	0	0	0
XLOC_005363|PGSC0003DMT400031260,PGSC0003DMT400031262,PGSC0003DMT400031264	PGSC0003DMB000000027:2127885-2131956	621352	214445	0	0	271619	576294	927113	24508	0	0	0	0	0	0	0	0
XLOC_005367|PGSC0003DMT400027895,PGSC0003DMT400027896,PGSC0003DMT400027897	PGSC0003DMB000000027:2240452-2243508	0	0	0	0	0	0	0	0	0	0	0	0	0	0	0	0
XLOC_005372|PGSC0003DMT400027968	PGSC0003DMB000000027:2454929-2462092	86073	566873	407693	561048	834529	746772	709756	137085	485081	563855	427088	1792520	519103	577434	513305	547525
XLOC_005373|PGSC0003DMT400027968	PGSC0003DMB000000027:2454929-2462092	696536	852232	412735	104116	835505	662781	379964	585561	451598	417031	582246	582246	732962	468434	303716	294512
XLOC_005374|PGSC0003DMT400027970,PGSC0003DMT400027971,PGSC0003DMT400027972	PGSC0003DMB000000027:2466327-2475201	0	0	0	0	165406	226175	2858633	111837	0	0	0	0	0	0	0	0
XLOC_005375|PGSC0003DMT400027973,PGSC0003DMT400027974	PGSC0003DMB000000027:2516482-2524725	178518	2026702	176961	888392	163981	167834	187378	830446	960032	193535	0	0	0	0	0	0
XLOC_005376|PGSC0003DMT400027975	PGSC0003DMB000000027:2616094-2617791	0	0	0	26003	0	0	0	0	0	0	0	0	0	0	0	0
XLOC_005377|PGSC0003DMT400027976	PGSC0003DMB000000027:2619062-2622910	122664	44,53	290739	102496	388053	939815	882377	818414	681674	801177	527331	175777	94833	873462	100025	555696
XLOC_005382|PGSC0003DMT400046295,PGSC0003DMT400046296,PGSC0003DMT400046297	PGSC0003DMB000000027:2715842-2720959	0	0	0	0	0	0	0	0	0	0	0	0	0	0	0	0
XLOC_005384|PGSC0003DMT400043686	PGSC0003DMB000000027:2858231-2871395	0	0	0	0	0	0	0	0	0	0	0	0	0	0	0	0
XLOC_005386|-	PGSC0003DMB000000027:2850648-2851573	0	0	0	0	0	0	0	0	0	0	0	0	0	0	0	0
XLOC_005387|-	PGSC0003DMB000000027:2852252-2852852	155648	483424	0	0	0	0	0	0	0	0	0	0	0	0	0	0
XLOC_005391|-	PGSC0003DMB000000028:375007-411416	0	0	0	0	0	0	0	0	0	0	0	0	0	0	0	0
XLOC_005393|PGSC0003DMT400062105,PGSC0003DMT400062106,PGSC0003DMT400062107,PGSC0003DMT400062108	PGSC0003DMB000000028:528906-533265	162656	168384	0	0	220175	322143	397778	1691774	261202	127024	0	0	0	0	314191	246695
XLOC_005394|PGSC0003DMT400014025,PGSC0003DMT400014029	PGSC0003DMB000000028:560934-578647	0	0	0	0	156492	637864	0	0	0	0	0	0	0	0	0	0
XLOC_005400|PGSC0003DMT400045626,PGSC0003DMT400045627,PGSC0003DMT400045628,PGSC0003DMT400045629	PGSC0003DMB000000028:1301598-1343407	154321	102393	104,26	113206	920697	732546	114981	92471	147654	113345	532357	109824	103188	125858	100086	417735
XLOC_005404|PGSC0003DMT400045616	PGSC0003DMB000000028:1636055-1637743	353213	398922	232553	153035	336774	34628	223969	271276	335873	230701	137786	31494	495578	251515	149346	448039
XLOC_005405|PGSC0003DMT400045614,PGSC0003DMT400045615	PGSC0003DMB000000028:1649280-1654092	413252	307278	244369	224927	412232	357477	384877	236532	237669	46,82	202515	11491	520746	286537	370417	2855741
XLOC_005418|PGSC0003DMT400042977,PGSC0003DMT400042981	PGSC0003DMB000000028:2502561-2523970	207064	317817	0	0	158129	179681	1408559	1735908	0	0	0	0	0	0	0	0
XLOC_005422|-	PGSC0003DMB000000028:2617773-2624536	466171	492631	252563	643289	644736	471975	419144	50076	332465	417334	320092	133608	655295	459857	538951	295661
XLOC_005423|PGSC0003DMT400042984,PGSC0003DMT400042986	PGSC0003DMB000000028:2693368-2704987	0	0	0	0	284035	133244	0	0	0	0	0	0	0	0	0	0
XLOC_005424|-	PGSC0003DMB000000028:2705107-2708009	385763	605119	761952	250707	0	0	143888	14013	0	0	0	0	57991	763039	0	0
XLOC_005429|PGSC0003DMT400062099,PGSC0003DMT400062100	PGSC0003DMB000000028:257283-263123	137658	908861	0	0	133369	1953227	0	0	714506	21744	0	0	0	0	0	0
XLOC_005430|PGSC0003DMT400062098	PGSC0003DMB000000028:266463-273761	526135	665939	397767	583646	564982	462972	586199	43214	482271	51843	295731	181988	40,91	592119	355987	34,52
XLOC_005435|-	PGSC0003DMB000000028:478160-491722	954114	130606	175177	601258	386259	196162	593604	542229	168351	291591	296344	531441	902151	78172	149133	251661
XLOC_005441|PGSC0003DMT400045610,PGSC0003DMT400045611	PGSC0003DMB000000028:1209624-1216354	11738	218759	0	0	0	0	400613	644957	0	0	0	0	0	0	0	0
XLOC_005444|PGSC0003DMT400045607,PGSC0003DMT400045608,PGSC0003DMT400045609	PGSC0003DMB000000028:1301598-1343407	714333	175871	0	0	144021	682610	967992	485992	0	0	0	0	0	0	0	0
XLOC_005462|PGSC0003DMT400077257	PGSC0003DMB000000029:27928-28538	700011	581827	527,92	555376	608155	783786	863411	704819	668005	539352	357,17	201383	546655	658144	533342	490098
XLOC_005472|-	PGSC0003DMB000000029:881472-911427	0	0	0	0	0	0	0	0	0	0	0	0	0	0	0	0
XLOC_005495|-	PGSC0003DMB000000029:2164112-2174956	1536181	254338	288999	526877	1011693	264939	272412	504814	0	0	451669	220002	0	0	312977	278201
XLOC_005499|PGSC0003DMT400068664,PGSC0003DMT400068665,PGSC0003DMT400068666,PGSC0003DMT400068667,PGSC0003DMT400068668,PGSC0003DMT400068669,PGSC0003DMT400068670	PGSC0003DMB000000029:2448108-2453069	291127	900475	183234	457327	0	0	0	0	781653	190042	0	0	0	0	0	0
XLOC_005503|PGSC0003DMT400034351,PGSC0003DMT400034352,PGSC0003DMT400034353,PGSC0003DMT400034354	PGSC0003DMB000000029:2707444-2710734	147321	265893	837878	293817	211838	269689	366279	1374014	318142	131461	0	0	0	0	242683	2222472
XLOC_005516|PGSC0003DMT400071781	PGSC0003DMB000000029:1283654-1286603	206261	2485385	456134	225198	190697	396138	0	0	489285	125552	0	0	0	0	409092	0
XLOC_005531|PGSC0003DMT400034355	PGSC0003DMB000000029:2690200-2702319	0	0	0	0	0	0	0	0	0	0	0	0	0	0	0	0
XLOC_005533|-	PGSC0003DMB000000029:2761730-2783121	756546	716627	654936	245923	91574	47,73	911137	604912	24404	904191	0	0	715934	102,88	61847	110702
XLOC_005571|PGSC0003DMT400016672	PGSC0003DMB000000030:2511920-2513823	0	0	0	0	0	0	0	0	0	0	0	0	0	0	0	0
XLOC_005609|-	PGSC0003DMB000000030:1752982-1771432	0	0	0	0	0	0	0	0	0	0	0	0	0	0	0	0
XLOC_005634|PGSC0003DMT400010758,PGSC0003DMT400010760	PGSC0003DMB000000031:459380-461889	0	0	0	0	0	0	0	0	0	0	0	0	0	0	0	0
XLOC_005644|PGSC0003DMT400010772,PGSC0003DMT400094795	PGSC0003DMB000000031:1057982-1066938	310929	270032	621993	310767	735205	87146	991858	104107	128337	148953	537478	137747	503753	127242	147,63	15164
XLOC_005648|-	PGSC0003DMB000000031:1423389-1448883	0	0	0	0	0	0	0	0	0	0	0	0	0	0	0	0
XLOC_005668|-	PGSC0003DMB000000031:533093-557298	0	0	0	0	0	0	0	0	0	0	0	0	0	0	0	0
XLOC_005675|PGSC0003DMT400010800,PGSC0003DMT400010802	PGSC0003DMB000000031:969149-982889	183333	809511	0	0	280622	167164	2645361	2800986	0	0	0	0	0	0	0	0
XLOC_005676|PGSC0003DMT400010816	PGSC0003DMB000000031:969149-982889	0	0	0	0	0	0	0	0	0	0	0	0	0	0	0	0
XLOC_005678|PGSC0003DMT400010772	PGSC0003DMB000000031:1057982-1066938	0	0	0	0	327203	224952	188482	132495	122,62	193013	237141	414997	0	224455	140567	749693
XLOC_005687|-	PGSC0003DMB000000031:1712411-1732375	0	0	0	0	0	0	0	0	0	0	0	0	0	0	0	0
XLOC_005691|-	PGSC0003DMB000000031:1836869-1861140	724332	564671	66581	267645	747112	369601	51,44	418974	2536215	558591	197618	25082	446984	669941	287452	448156
XLOC_005695|PGSC0003DMT400052895,PGSC0003DMT400052896,PGSC0003DMT400052897	PGSC0003DMB000000031:2242416-2248482	154183	179741	0	0	132066	971719	0	0	0	0	0	0	0	0	0	0
XLOC_005699|-	PGSC0003DMB000000031:435224-435955	0	0	0	0	0	0	0	0	0	0	0	0	0	0	0	0
XLOC_005700|PGSC0003DMT400013226,PGSC0003DMT400013227,PGSC0003DMT400013228	PGSC0003DMB000000032:4868-9557	204166	162715	0	0	0	0	686829	855545	0	0	0	0	0	0	0	0
XLOC_005702|PGSC0003DMT400013222,PGSC0003DMT400013224,PGSC0003DMT400013225	PGSC0003DMB000000032:62789-71438	235986	235258	0	0	121611	238646	858122	146939	260435	128431	0	0	0	0	299611	149656
XLOC_005703|PGSC0003DMT400013219,PGSC0003DMT400013220,PGSC0003DMT400013221	PGSC0003DMB000000032:99001-104707	0	0	0	0	0	0	0	0	0	0	0	0	0	0	0	0
XLOC_005705|PGSC0003DMT400013215,PGSC0003DMT400013216,PGSC0003DMT400013217	PGSC0003DMB000000032:121683-135731	304191	624192	0	0	314688	254805	162978	267431	66519	416347	0	0	0	0	0	0
XLOC_005706|PGSC0003DMT400013212,PGSC0003DMT400013213,PGSC0003DMT400013214	PGSC0003DMB000000032:145566-149455	0	0	0	0	0	0	0	0	0	0	0	0	0	0	0	0
XLOC_005707|-	PGSC0003DMB000000032:170776-174079	1441,68	1264,88	1199,81	521865	636461	621982	313,58	275238	608449	1121,76	431524	803051	291751	268599	254314	1069,02
XLOC_005708|PGSC0003DMT400013206,PGSC0003DMT400013207,PGSC0003DMT400013208,PGSC0003DMT400013209	PGSC0003DMB000000032:175077-183042	121341	813121	857684	352758	196159	952299	154654	263307	652098	628964	257112	1824358	312786	2431391	529563	202364
XLOC_005710|PGSC0003DMT400013200,PGSC0003DMT400013201	PGSC0003DMB000000032:192925-197596	300836	34,53	0	0	431245	13941	162304	32115	181115	293705	0	0	0	0	0	0
XLOC_005711|PGSC0003DMT400013193,PGSC0003DMT400013197,PGSC0003DMT400013198,PGSC0003DMT400013199	PGSC0003DMB000000032:209084-216350	489813	350,93	195094	763681	24485	343425	1685170	298604	516539	211983	310642	453314	196158	24485	447636	527191
XLOC_005714|PGSC0003DMT400013185,PGSC0003DMT400013186,PGSC0003DMT400013187,PGSC0003DMT400013188	PGSC0003DMB000000032:232108-237715	624893	672218	700037	21006	440278	440495	475042	383937	258344	761537	0	0	408049	337733	264753	572437
XLOC_005718|PGSC0003DMT400009449	PGSC0003DMB000000032:306758-316479	0	0	0	0	151853	618966	0	0	0	0	0	0	0	0	0	0
XLOC_005719|PGSC0003DMT400009450	PGSC0003DMB000000032:320388-321155	0	0	0	0	0	0	0	0	0	0	0	0	0	0	0	0
XLOC_005720|PGSC0003DMT400009451	PGSC0003DMB000000032:331892-333940	220226	186544	253534	122678	513813	179617	161059	1422165	979082	318504	0	0	586885	313636	0	0
XLOC_005721|-	PGSC0003DMB000000032:348996-357009	786776	166612	0	0	0	0	602918	171032	0	0	0	0	0	0	0	0
XLOC_005726|PGSC0003DMT400009462	PGSC0003DMB000000032:402081-403312	1603,78	2956,98	1400,75	9209,67	841068	3540,58	800039	2044,24	3346,89	1909,53	2864,55	547,25	1676,35	798027	3114,11	1655,56
XLOC_005729|PGSC0003DMT400009474	PGSC0003DMB000000032:463716-469350	693978	853768	693199	193292	104283	583163	861139	898267	539927	110,08	198894	261049	536525	705954	648428	754534
XLOC_005730|PGSC0003DMT400009475,PGSC0003DMT400009476	PGSC0003DMB000000032:471730-475749	144458	250247	191342	331368	446919	661558	19968	111129	771308	305258	0	0	313855	534119	0	0
XLOC_005731|PGSC0003DMT400009477	PGSC0003DMB000000032:495940-506187	0	0	0	0	0	0	0	0	0	0	0	0	0	0	0	0
XLOC_005733|PGSC0003DMT400009481,PGSC0003DMT400009482	PGSC0003DMB000000032:518301-519037	594148	610034	640129	421243	842919	584054	478133	60552	385217	30869	0	304768	365442	801289	706555	643894
XLOC_005734|PGSC0003DMT400009483	PGSC0003DMB000000032:534437-535899	74342	292558	374439	163062	244372	132636	409439	212665	115679	652478	0	0	205353	661718	146976	117876
XLOC_005735|PGSC0003DMT400009484,PGSC0003DMT400009485,PGSC0003DMT400009486,PGSC0003DMT400009487,PGSC0003DMT400009488	PGSC0003DMB000000032:566831-571413	336766	284663	295609	21299	151225	35702	177751	169553	187852	355485	0	0	0	0	227464	374485
XLOC_005736|PGSC0003DMT400009489	PGSC0003DMB000000032:584358-593901	0	0	0	0	0	0	0	0	0	0	0	0	0	0	0	0
XLOC_005737|PGSC0003DMT400009491,PGSC0003DMT400009492	PGSC0003DMB000000032:631458-638317	536795	332337	442179	659918	986192	236655	369457	44442	30947	623337	0	0	244237	47,57	169317	625457
XLOC_005738|PGSC0003DMT400009493	PGSC0003DMB000000032:651834-653269	0	0	146384	389026	223561	1157395	239221	621265	0	0	0	0	428503	349568	0	0
XLOC_005741|PGSC0003DMT400009499	PGSC0003DMB000000032:758888-760110	669796	652134	684294	225155	19,18	389594	218063	355971	209643	453572	0	0	0	0	0	0
XLOC_005742|PGSC0003DMT400009500,PGSC0003DMT400009501,PGSC0003DMT400009502,PGSC0003DMT400009503,PGSC0003DMT400009504	PGSC0003DMB000000032:782235-787309	0	0	0	0	0	0	0	0	667702	181944	0	0	0	0	0	0
XLOC_005743|PGSC0003DMT400009505	PGSC0003DMB000000032:788078-795900	0	0	0	0	0	0	0	0	0	0	0	0	0	0	0	0
XLOC_005745|PGSC0003DMT400009507	PGSC0003DMB000000032:865963-868303	371157	336848	179715	126,12	698634	305469	369337	310041	176,01	268395	850988	143604	210427	616683	203033	191683
XLOC_005751|PGSC0003DMT400009513,PGSC0003DMT400009514,PGSC0003DMT400009515	PGSC0003DMB000000032:952293-954202	409806	163308	280511	659261	382708	125523	362075	144672	122,77	284373	211992	286189	115015	451466	160845	305801
XLOC_005752|PGSC0003DMT400009516,PGSC0003DMT400009517,PGSC0003DMT400009518	PGSC0003DMB000000032:961063-966329	346269	422067	164232	349727	202678	403454	163087	24575	34151	163912	290119	222171	347618	137257	376849	568796
XLOC_005758|PGSC0003DMT400009533	PGSC0003DMB000000032:1050426-1053464	308097	468418	252781	462073	131207	164009	258567	243513	153657	193494	0	208016	287036	225015	0	0
XLOC_005759|PGSC0003DMT400009534,PGSC0003DMT400009535,PGSC0003DMT400009536,PGSC0003DMT400009537	PGSC0003DMB000000032:1054680-1060211	208202	362404	232838	525965	325086	202936	230434	184836	163249	252025	0	0	202774	298827	132056	313688
XLOC_005760|PGSC0003DMT400009538	PGSC0003DMB000000032:1063543-1067249	0	0	0	0	0	0	0	0	0	0	0	0	0	0	0	0
XLOC_005761|PGSC0003DMT400009540,PGSC0003DMT400009541,PGSC0003DMT400009542,PGSC0003DMT400009543	PGSC0003DMB000000032:1068399-1077886	0	0	0	0	713066	145603	0	0	0	0	0	0	0	0	0	0
XLOC_005762|PGSC0003DMT400009544,PGSC0003DMT400009545	PGSC0003DMB000000032:1084967-1090876	144302	15279	0	0	55854	169902	110947	861157	150732	267872	0	0	0	0	0	0
XLOC_005763|PGSC0003DMT400009546	PGSC0003DMB000000032:1091590-1094637	251683	245989	0	0	0	0	2952591	542522	0	0	0	0	0	0	0	0
XLOC_005764|-	PGSC0003DMB000000032:1129660-1130542	170934	402185	0	0	0	0	0	0	0	0	0	0	0	0	0	0
XLOC_005765|PGSC0003DMT400086212	PGSC0003DMB000000032:1143872-1145293	153568	307437	359998	912204	0	196,19	176142	201654	143055	859952	0	0	89614	0	930392	213403
XLOC_005766|PGSC0003DMT400009548,PGSC0003DMT400009549	PGSC0003DMB000000032:1164334-1172448	925922	155774	0	0	611239	155778	0	0	0	0	0	0	0	0	0	0
XLOC_005767|PGSC0003DMT400009550	PGSC0003DMB000000032:1190704-1205336	2534328	229799	0	0	194367	13847	830354	10466	0	0	0	0	0	0	0	0
XLOC_005768|PGSC0003DMT400009551,PGSC0003DMT400009552,PGSC0003DMT400009553	PGSC0003DMB000000032:1216841-1220407	0	0	0	0	0	0	0	0	0	0	0	0	0	0	0	0
XLOC_005769|PGSC0003DMT400009554,PGSC0003DMT400009555,PGSC0003DMT400009556,PGSC0003DMT400009557	PGSC0003DMB000000032:1245378-1248961	217753	309834	798571	451865	267223	237892	795925	221873	255027	14626	279962	563506	0	0	317082	1309062
XLOC_005770|PGSC0003DMT400025521	PGSC0003DMB000000032:1270282-1273228	0	0	0	0	0	0	0	0	0	0	0	0	0	0	0	0
XLOC_005772|PGSC0003DMT400025526,PGSC0003DMT400025527,PGSC0003DMT400025528	PGSC0003DMB000000032:1286272-1290424	174603	173422	0	0	715579	2469741	488463	724647	0	0	0	0	0	0	0	0
XLOC_005773|PGSC0003DMT400025529	PGSC0003DMB000000032:1291811-1295535	302458	527471	1287755	242818	36937	246247	306095	498567	438337	145258	0	0	401188	316727	507785	564205
XLOC_005774|PGSC0003DMT400025530,PGSC0003DMT400025532,PGSC0003DMT400025533	PGSC0003DMB000000032:1302354-1307000	36638	250112	139973	345477	411008	442655	262674	375115	301526	154287	0	0	532656	224285	323046	326565
XLOC_005776|PGSC0003DMT400025537	PGSC0003DMB000000032:1323308-1326499	0	0	0	0	178418	133814	619392	963301	0	0	0	0	0	0	0	0
XLOC_005777|PGSC0003DMT400025539	PGSC0003DMB000000032:1347434-1349589	149975	212066	0	0	303867	274432	135775	228037	1081089	233041	0	0	2352802	282653	0	0
[truncated: 12,583 more rows]

## Sheet: 1H-dry-vs-1H-wet.groupDiffGeneF
gene_id	locus	log2Ratio(1H-wet/1H-dry)	probability	transcript_id	KEGG Orthology	GO Component	GO Function	GO Process	Blast nr
XLOC_024842|PGSC0003DMT400047317	PGSC0003DMB000000233:924635-925098	17.8929	0.986822	TCONS_00044648	-	-	-	-	gi|460395472|ref|XP_004243307.1|/4.64266e-28/PREDICTED: uncharacterized protein LOC101253915 [Solanum lycopersicum]
XLOC_002528|-	PGSC0003DMB000000010:2753280-2753504	16.4017	0.957596	TCONS_00004652	-	-	-	-	gi|460368049|ref|XP_004229882.1|/7.26574e-09/PREDICTED: golgin candidate 4-like [Solanum lycopersicum]
XLOC_027832|-	PGSC0003DMB000000287:374556-374758	16.2165	0.950853	TCONS_00049762	-	-	-	-	-
XLOC_039393|-	PGSC0003DMB000000845:1218-2055	16.0612	0.944932	TCONS_00069582	-	-	-	-	gi|47825005|gb|AAT38777.1|/1.96009e-09/hypothetical protein SDM1_44t00011 [Solanum demissum]
XLOC_038203|-	PGSC0003DMB000000689:9445-9735	15.7252	0.927696	TCONS_00067680	K03879|1|9e-22|99.8|ath:ArthMp026|NADH-ubiquinone oxidoreductase chain 2 [EC:1.6.5.3]	GO:0043231//intracellular membrane-bounded organelle	GO:0050136//NADH dehydrogenase (quinone) activity	GO:0022904//respiratory electron transport chain	gi|323435045|ref|YP_004222261.1|/8.86683e-31/hypothetical protein BevumaM_p022 [Beta vulgaris subsp. maritima]
XLOC_024841|PGSC0003DMT400047316	PGSC0003DMB000000233:922346-922866	15.6582	0.923513	TCONS_00044647	-	-	-	-	gi|460395470|ref|XP_004243306.1|/5.25504e-30/PREDICTED: uncharacterized protein LOC101253603 [Solanum lycopersicum]
XLOC_003570|PGSC0003DMT400007736,PGSC0003DMT400007737	PGSC0003DMB000000017:2301178-2304305	15.3615	0.901694	TCONS_00006330	K13448|1|4e-32|136|vvi:100247858|calcium-binding protein CML	-	-	-	gi|350537863|ref|NP_001234570.1|/2.74688e-70/regulator of gene silencing [Solanum lycopersicum]
XLOC_033702|PGSC0003DMT400010100,PGSC0003DMT400010101	PGSC0003DMB000000445:391604-392715	15.1931	0.886241	TCONS_00060021	-	-	-	-	gi|460400379|ref|XP_004245712.1|/6.2675e-101/PREDICTED: uncharacterized protein LOC101265157 [Solanum lycopersicum]
XLOC_018072|PGSC0003DMT400076533	PGSC0003DMB000000136:1374980-1391116	15.1829	0.88543	TCONS_00032661	-	-	-	-	gi|460369609|ref|XP_004230650.1|/4.59902e-29/PREDICTED: uncharacterized protein LOC101251932 [Solanum lycopersicum]
XLOC_035683|-	PGSC0003DMB000000532:286481-292521	15.1419	0.881132	TCONS_00063528	-	-	-	-	gi|460367220|ref|XP_004229473.1|/6.52163e-29/PREDICTED: uncharacterized protein LOC101266756 [Solanum lycopersicum]
XLOC_028823|PGSC0003DMT400093069	PGSC0003DMB000000308:582307-582640	15.0431	0.870262	TCONS_00051497	K02878|1|5e-18|87.4|mtr:MTR_4g034750|large subunit ribosomal protein L16	GO:0030529//ribonucleoprotein complex;GO:0009536//plastid	GO:0003723//RNA binding;GO:0005198//structural molecule activity	GO:0010467//gene expression	gi|1323711|gb|AAC00527.1|/7.89454e-43/ribosomal protein L16 (mitochondrion) [Petunia sp.]
XLOC_039716|PGSC0003DMT400017154	PGSC0003DMB000000945:32307-40142	15.0288	0.868765	TCONS_00070058	-	-	-	-	-
XLOC_023785|PGSC0003DMT400042530,PGSC0003DMT400042531	PGSC0003DMB000000215:63498-64542	15.02	0.867611	TCONS_00042896	-	-	-	-	gi|460392295|ref|XP_004241752.1|/6.50812e-57/PREDICTED: uncharacterized protein LOC101254600 [Solanum lycopersicum]
XLOC_019755|-	PGSC0003DMB000000152:1191443-1191696	14.8748	0.849598	TCONS_00035914	K03921|1|2e-12|68.6|vvi:100853715|acyl-[acyl-carrier-protein] desaturase [EC:1.14.19.2]	GO:0009536//plastid	GO:0046872//metal ion binding;GO:0016717//oxidoreductase activity, acting on paired donors, with oxidation of a pair of donors resulting in the reduction of molecular oxygen to two molecules of water	GO:0006631//fatty acid metabolic process	gi|460409301|ref|XP_004250077.1|/2.12376e-16/PREDICTED: acyl-[acyl-carrier-protein] desaturase, chloroplastic-like [Solanum lycopersicum]
XLOC_035282|-	PGSC0003DMB000000512:20901-69237	14.8345	0.844569	TCONS_00062816	-	GO:0031224//intrinsic to membrane	GO:0022891//substrate-specific transmembrane transporter activity	GO:0071702;GO:0006811//ion transport	gi|460388378|ref|XP_004239844.1|/1.38595e-31/PREDICTED: organic cation/carnitine transporter 3-like [Solanum lycopersicum]
XLOC_034373|-	PGSC0003DMB000000475:42838-43111	14.8011	0.840225	TCONS_00061093	K13210|1|5e-26|114|vvi:100253453|far upstream element-binding protein	-	-	-	gi|460410590|ref|XP_004250708.1|/1.53022e-46/PREDICTED: uncharacterized protein LOC101264287 [Solanum lycopersicum]
XLOC_031391|-	PGSC0003DMB000000376:450796-451032	14.7959	0.83938	TCONS_00056033	-	-	GO:0004091//carboxylesterase activity;GO:0004857//enzyme inhibitor activity	-	gi|110083943|gb|ABG49144.1|/2.92502e-13/pectin methylesterase inhibitor isoform [Solanum phureja]
XLOC_036567|PGSC0003DMT400071332	PGSC0003DMB000000577:71744-75927	14.6101	0.813594	TCONS_00065020	-	-	-	-	-
XLOC_025972|PGSC0003DMT400044882	PGSC0003DMB000000251:732317-735355	14.5998	0.812029	TCONS_00046727	-	-	-	-	gi|460396642|ref|XP_004243880.1|/1.20294e-59/PREDICTED: uncharacterized protein LOC101266239 [Solanum lycopersicum]
XLOC_018710|PGSC0003DMT400093823	PGSC0003DMB000000144:142564-142936	14.5896	0.810246	TCONS_00033807	-	-	-	-	gi|460400736|ref|XP_004245888.1|/1.79114e-55/PREDICTED: uncharacterized protein LOC101266965 [Solanum lycopersicum]
XLOC_006388|-	PGSC0003DMB000000034:1529656-1530006	-14.8582	0.847529	TCONS_00011515	-	-	-	-	-
XLOC_023035|-	PGSC0003DMB000000202:415847-416057	-15.2388	0.890733	TCONS_00041557	K03883|1|3e-35|144|vvi:7498671|NADH-ubiquinone oxidoreductase chain 5 [EC:1.6.5.3]	-	-	-	gi|403311551|gb|AFR34299.1|/5.05849e-34/NADH dehydrogenase subunit 5 (mitochondrion) [Glycine max]
XLOC_017415|PGSC0003DMT400060959	PGSC0003DMB000000129:1144706-1148107	-15.5451	0.915969	TCONS_00031438	-	GO:0043231//intracellular membrane-bounded organelle;GO:0030312//external encapsulating structure	-	-	gi|460407677|ref|XP_004249277.1|/1.1634e-22/PREDICTED: uncharacterized protein LOC101260588 [Solanum lycopersicum]
XLOC_007008|-	PGSC0003DMB000000039:90507-90786	-15.7592	0.929845	TCONS_00012589	-	-	-	-	-
XLOC_026615|-	PGSC0003DMB000000266:179620-179877	-16.1955	0.949938	TCONS_00047644	-	-	-	-	gi|255561616|ref|XP_002521818.1|/1.32909e-10/conserved hypothetical protein [Ricinus communis]
XLOC_023778|-	PGSC0003DMB000000214:232855-233062	-17.6419	0.983713	TCONS_00042888	-	-	-	-	-

## Sheet: 24H-dry-vs-24H-wet.groupDiffGen
gene_id	locus	log2Ratio(24H-wet/24H-dry)	probability	transcript_id	KEGG Orthology	GO Component	GO Function	GO Process	Blast nr
XLOC_022488|PGSC0003DMT400046356	PGSC0003DMB000000193:1070331-1081595	19.4368	0.993811	TCONS_00040642	K06892|1|1e-07|55.8|pop:POPTR_550478|;K04125|2|3e-06|50.8|vvi:100244543|gibberellin 2-oxidase [EC:1.14.11.13];K05933|3|4e-06|45.4|mtr:MTR_3g083370|aminocyclopropanecarboxylate oxidase [EC:1.14.17.4]	-	GO:0016706//oxidoreductase activity, acting on paired donors, with incorporation or reduction of molecular oxygen, 2-oxoglutarate as one donor, and incorporation of one atom each of oxygen into both donors;GO:0016701//oxidoreductase activity, acting on single donors with incorporation of molecular oxygen	GO:0012501//programmed cell death;GO:0009699//phenylpropanoid biosynthetic process	gi|460366174|ref|XP_004228966.1|/2.05739e-34/PREDICTED: feruloyl CoA ortho-hydroxylase 1-like [Solanum lycopersicum]
XLOC_018072|PGSC0003DMT400076533	PGSC0003DMB000000136:1374980-1391116	19.234	0.992954	TCONS_00032661	-	-	-	-	gi|460369609|ref|XP_004230650.1|/4.59902e-29/PREDICTED: uncharacterized protein LOC101251932 [Solanum lycopersicum]
XLOC_037788|PGSC0003DMT400071904,PGSC0003DMT400071905	PGSC0003DMB000000660:53596-54484	19.1013	0.992199	TCONS_00066989	-	GO:0031224//intrinsic to membrane	-	-	gi|225448613|ref|XP_002278922.1|/2.27562e-27/PREDICTED: uncharacterized protein LOC100267335 [Vitis vinifera]
XLOC_027832|-	PGSC0003DMB000000287:374556-374758	18.2781	0.986867	TCONS_00049762	-	-	-	-	-
XLOC_013408|-	PGSC0003DMB000000094:23172-23429	17.9913	0.983713	TCONS_00024057	-	GO:0005739//mitochondrion	-	-	gi|57013905|ref|YP_173378.1|/9.8339e-14/hypothetical protein NitaMp032 [Nicotiana tabacum]
XLOC_024833|PGSC0003DMT400047339	PGSC0003DMB000000233:901156-901790	17.8235	0.981655	TCONS_00044639	-	-	-	-	gi|460395480|ref|XP_004243311.1|/1.70031e-30/PREDICTED: uncharacterized protein LOC101255116 [Solanum lycopersicum]
XLOC_014850|-	PGSC0003DMB000000104:783196-783422	17.7079	0.980147	TCONS_00026836	-	-	-	-	-
XLOC_007035|-	PGSC0003DMB000000040:503612-530780	17.5664	0.977661	TCONS_00012663	K00814|1|2e-19|92.0|aly:ARALYDRAFT_476362|alanine transaminase [EC:2.6.1.2]	GO:0043231//intracellular membrane-bounded organelle	GO:0046914//transition metal ion binding;GO:0003824//catalytic activity;GO:0032559	-	gi|460379557|ref|XP_004235528.1|/2.9362e-26/PREDICTED: alanine aminotransferase 2, mitochondrial-like [Solanum lycopersicum]
XLOC_032554|PGSC0003DMT400033741	PGSC0003DMB000000410:373912-380167	17.5536	0.977472	TCONS_00057997	-	-	-	-	gi|460386528|ref|XP_004238950.1|/1.5506e-65/PREDICTED: uncharacterized protein LOC101261228 [Solanum lycopersicum]
XLOC_014126|-	PGSC0003DMB000000099:1114970-1170955	17.5274	0.977181	TCONS_00025470	-	-	-	-	-
XLOC_020009|PGSC0003DMT400000778,PGSC0003DMT400000779,PGSC0003DMT400000780	PGSC0003DMB000000155:872669-876351	17.396	0.975106	TCONS_00036403	K00469|1|2e-145|513|vvi:100254212|inositol oxygenase [EC:1.13.99.1]	GO:0044424//intracellular part	GO:0046914//transition metal ion binding;GO:0016701//oxidoreductase activity, acting on single donors with incorporation of molecular oxygen	GO:0006020//inositol metabolic process	gi|350538319|ref|NP_001234593.1|/9.59887e-177/myo-inositol oxygenase [Solanum lycopersicum]
XLOC_001840|PGSC0003DMT400028623	PGSC0003DMB000000008:1058923-1059969	17.3183	0.9737	TCONS_00003301	-	GO:0016020//membrane;GO:0043231//intracellular membrane-bounded organelle	-	GO:0007165//signal transduction	gi|460408473|ref|XP_004249669.1|/1.8983e-96/PREDICTED: heme-binding-like protein At3g10130, chloroplastic-like [Solanum lycopersicum]
XLOC_023929|PGSC0003DMT400035153,PGSC0003DMT400035154,PGSC0003DMT400035155	PGSC0003DMB000000216:742238-743766	17.2887	0.973118	TCONS_00043217	-	-	-	-	gi|460385934|ref|XP_004238655.1|/1.5048e-52/PREDICTED: uncharacterized protein LOC101248387 [Solanum lycopersicum]
XLOC_026910|-	PGSC0003DMB000000272:433402-434216	17.1688	0.971112	TCONS_00048151	-	-	-	-	-
XLOC_022766|PGSC0003DMT400019529,PGSC0003DMT400019530	PGSC0003DMB000000200:604288-607246	16.9029	0.965145	TCONS_00041051	-	-	-	-	gi|460366244|ref|XP_004228998.1|/5.09935e-42/PREDICTED: uncharacterized protein LOC101259189 [Solanum lycopersicum]
XLOC_005121|PGSC0003DMT400036993	PGSC0003DMB000000026:1349161-1350126	16.8369	0.963534	TCONS_00009188	-	-	-	-	-
XLOC_010037|-	PGSC0003DMB000000063:284949-285161	16.7796	0.961991	TCONS_00018079	-	-	-	-	-
XLOC_024842|PGSC0003DMT400047317	PGSC0003DMB000000233:924635-925098	16.6601	0.958802	TCONS_00044648	-	-	-	-	gi|460395472|ref|XP_004243307.1|/4.64266e-28/PREDICTED: uncharacterized protein LOC101253915 [Solanum lycopersicum]
XLOC_024682|PGSC0003DMT400065876	PGSC0003DMB000000230:797898-812992	16.6281	0.957979	TCONS_00044427	-	GO:0031224//intrinsic to membrane	GO:0015301//anion:anion antiporter activity;GO:0015103//inorganic anion transmembrane transporter activity	GO:0006820//anion transport;GO:0010035//response to inorganic substance	gi|225437677|ref|XP_002272575.1|/2.50758e-09/PREDICTED: probable boron transporter 2-like [Vitis vinifera]
XLOC_010323|PGSC0003DMT400017550	PGSC0003DMB000000068:1920462-1930017	16.6063	0.957465	TCONS_00018537	K05863|1|1e-153|541|rcu:RCOM_0404010|solute carrier family 25 (mitochondrial adenine nucleotide translocator), member 4/5/6/31	GO:0019866//organelle inner membrane;GO:0043231//intracellular membrane-bounded organelle;GO:0031224//intrinsic to membrane	-	GO:0006810//transport	gi|460367518|ref|XP_004229620.1|/0/PREDICTED: ADP,ATP carrier protein, mitochondrial-like [Solanum lycopersicum]
XLOC_028409|-	PGSC0003DMB000000298:452924-453171	16.519	0.954739	TCONS_00050784	-	-	-	-	-
XLOC_028497|-	PGSC0003DMB000000300:520063-521534	16.4728	0.953179	TCONS_00050949	-	-	GO:0004866//endopeptidase inhibitor activity	GO:0010466//negative regulation of peptidase activity	gi|460394244|ref|XP_004242714.1|/4.7454e-32/PREDICTED: metallocarboxypeptidase inhibitor-like [Solanum lycopersicum]
XLOC_020338|PGSC0003DMT400026261	PGSC0003DMB000000159:649703-650459	16.4484	0.952407	TCONS_00037021	-	-	-	-	gi|460379484|ref|XP_004235492.1|/2.7551e-103/PREDICTED: miraculin-like, partial [Solanum lycopersicum]
XLOC_037602|PGSC0003DMT400059093,PGSC0003DMT400059094	PGSC0003DMB000000646:174511-176938	16.3587	0.949681	TCONS_00066744	-	-	-	-	gi|460374308|ref|XP_004232953.1|/4.32786e-60/PREDICTED: uncharacterized protein LOC101246784 [Solanum lycopersicum]
XLOC_019755|-	PGSC0003DMB000000152:1191443-1191696	16.3514	0.949458	TCONS_00035914	K03921|1|2e-12|68.6|vvi:100853715|acyl-[acyl-carrier-protein] desaturase [EC:1.14.19.2]	GO:0009536//plastid	GO:0046872//metal ion binding;GO:0016717//oxidoreductase activity, acting on paired donors, with oxidation of a pair of donors resulting in the reduction of molecular oxygen to two molecules of water	GO:0006631//fatty acid metabolic process	gi|460409301|ref|XP_004250077.1|/2.12376e-16/PREDICTED: acyl-[acyl-carrier-protein] desaturase, chloroplastic-like [Solanum lycopersicum]
XLOC_004190|PGSC0003DMT400003777	PGSC0003DMB000000020:2630413-2636417	16.3399	0.949012	TCONS_00007504	K11294|1|5e-39|160|smo:SELMODRAFT_15428|nucleolin;K13195|4|1e-17|89.0|pop:POPTR_712972|cold-inducible RNA-binding protein;K13126|5|1e-16|85.9|pop:POPTR_1078863|polyadenylate-binding protein	GO:0032991//macromolecular complex	GO:0005488//binding	GO:0006950//response to stress	gi|460404650|ref|XP_004247794.1|/6.32102e-99/PREDICTED: 29 kDa ribonucleoprotein, chloroplastic-like [Solanum lycopersicum]
XLOC_018222|PGSC0003DMT400035689	PGSC0003DMB000000138:37602-44447	16.2978	0.947418	TCONS_00032979	-	-	-	-	-
XLOC_024832|PGSC0003DMT400047338	PGSC0003DMB000000233:898489-898871	16.293	0.947195	TCONS_00044638	-	-	-	-	gi|460395480|ref|XP_004243311.1|/1.28462e-13/PREDICTED: uncharacterized protein LOC101255116 [Solanum lycopersicum]
XLOC_021703|PGSC0003DMT400010426,PGSC0003DMT400010427	PGSC0003DMB000000180:108987-113686	16.2442	0.945292	TCONS_00039342	-	-	-	-	gi|460393176|ref|XP_004242187.1|/1.88563e-57/PREDICTED: uncharacterized protein LOC101262731 [Solanum lycopersicum]
XLOC_035282|-	PGSC0003DMB000000512:20901-69237	16.2309	0.944898	TCONS_00062816	-	GO:0031224//intrinsic to membrane	GO:0022891//substrate-specific transmembrane transporter activity	GO:0071702;GO:0006811//ion transport	gi|460388378|ref|XP_004239844.1|/1.38595e-31/PREDICTED: organic cation/carnitine transporter 3-like [Solanum lycopersicum]
XLOC_011830|-	PGSC0003DMB000000080:678780-679744	16.2243	0.944761	TCONS_00021349	-	-	-	-	-
XLOC_040413|-	PGSC0003DMB000002420:840-1705	16.1287	0.940629	TCONS_00070956	-	-	-	-	-
XLOC_015041|PGSC0003DMT400049193	PGSC0003DMB000000106:417109-419866	16.1151	0.940046	TCONS_00027293	K06892|1|4e-64|243|pop:POPTR_550478|;K05277|2|3e-63|241|pop:POPTR_646527|leucoanthocyanidin dioxygenase [EC:1.14.11.19]	-	GO:0046914//transition metal ion binding;GO:0016706//oxidoreductase activity, acting on paired donors, with incorporation or reduction of molecular oxygen, 2-oxoglutarate as one donor, and incorporation of one atom each of oxygen into both donors;GO:0016701//oxidoreductase activity, acting on single donors with incorporation of molecular oxygen	GO:0008152//metabolic process	gi|460407264|ref|XP_004249074.1|/0/PREDICTED: leucoanthocyanidin dioxygenase-like [Solanum lycopersicum]
XLOC_019919|PGSC0003DMT400000995	PGSC0003DMB000000155:452689-453014	16.113	0.939977	TCONS_00036220	-	-	-	-	-
XLOC_009543|PGSC0003DMT400063741,PGSC0003DMT400063742,PGSC0003DMT400063743,PGSC0003DMT400063744	PGSC0003DMB000000060:842283-846963	16.1002	0.939274	TCONS_00017172	-	-	-	-	gi|460368829|ref|XP_004230267.1|/4.97082e-70/PREDICTED: F-box protein PP2-B15-like [Solanum lycopersicum]
XLOC_021210|-	PGSC0003DMB000000173:505850-506265	16.0947	0.939069	TCONS_00038484	-	-	-	-	-
XLOC_007242|-	PGSC0003DMB000000040:1410089-1421968	16.0741	0.938211	TCONS_00013174	-	-	-	-	-
XLOC_035216|PGSC0003DMT400053235,PGSC0003DMT400053236,PGSC0003DMT400053237,PGSC0003DMT400053238,PGSC0003DMT400053239	PGSC0003DMB000000511:185728-191883	16.0194	0.935794	TCONS_00062688	K02685|1|1e-07|54.7|aly:ARALYDRAFT_315746|DNA primase large subunit [EC:2.7.7.-]	-	-	-	gi|460412358|ref|XP_004251568.1|/2.89855e-81/PREDICTED: zinc finger Ran-binding domain-containing protein 2-like [Solanum lycopersicum]
XLOC_035865|-	PGSC0003DMB000000541:262977-295062	15.9931	0.934817	TCONS_00063847	-	-	-	-	gi|460366568|ref|XP_004229153.1|/4.24666e-49/PREDICTED: paladin-like [Solanum lycopersicum]
XLOC_001940|PGSC0003DMT400072343	PGSC0003DMB000000008:3066573-3067379	15.9832	0.934371	TCONS_00003505	K08488|1|1e-25|114|ath:AT1G32270|syntaxin 7	-	-	-	gi|24429927|gb|AAN52931.1|/1.92296e-121/hin1-like protein [Solanum tuberosum]
XLOC_016051|PGSC0003DMT400020425	PGSC0003DMB000000116:1133407-1172315	15.9775	0.93408	TCONS_00028989	K03098|1|2e-50|195|rcu:RCOM_0700620|outer membrane lipoprotein Blc	-	-	GO:0051234//establishment of localization	early no
XLOC_000840|PGSC0003DMT400032851	PGSC0003DMB000000004:3469105-3470202	15.9768	0.934063	TCONS_00001400	K13993|1|9e-39|158|mtr:MTR_6g022000|HSP20 family protein	-	-	-	gi|460372008|ref|XP_004231826.1|/1.70143e-62/PREDICTED: 18.1 kDa class I heat shock protein-like [Solanum lycopersicum]
XLOC_008944|PGSC0003DMT400046673	PGSC0003DMB000000055:975131-975942	15.922	0.931834	TCONS_00016049	-	-	-	-	gi|460381614|ref|XP_004236543.1|/4.2556e-76/PREDICTED: uncharacterized protein LOC101257758 [Solanum lycopersicum]
XLOC_030481|PGSC0003DMT400068383	PGSC0003DMB000000346:162618-163918	15.8562	0.928216	TCONS_00054458	-	-	-	-	gi|460392755|ref|XP_004241979.1|/2.02722e-54/PREDICTED: uncharacterized protein LOC101246541 [Solanum lycopersicum]
XLOC_026951|PGSC0003DMT400032496,PGSC0003DMT400032497	PGSC0003DMB000000273:455774-458284	15.852	0.928096	TCONS_00048230	-	-	-	-	gi|460398045|ref|XP_004244575.1|/1.28897e-76/PREDICTED: lipid transfer-like protein VAS-like [Solanum lycopersicum]
XLOC_034276|PGSC0003DMT400027391,PGSC0003DMT400027392	PGSC0003DMB000000472:153932-155988	15.8355	0.927376	TCONS_00060915	K08202|1|3e-29|128|cre:CHLREDRAFT_103526|MFS transporter, OCT family, solute carrier family 22 (organic cation transporter), member 4/5;K08145|3|3e-06|46.2|ppp:PHYPADRAFT_187073|MFS transporter, SP family, solute carrier family 2 (facilitated glucose transporter), member 8	GO:0016020//membrane	GO:0022891//substrate-specific transmembrane transporter activity	GO:0006810//transport	gi|460388378|ref|XP_004239844.1|/0/PREDICTED: organic cation/carnitine transporter 3-like [Solanum lycopersicum]
XLOC_012010|PGSC0003DMT400057819	PGSC0003DMB000000083:1043991-1044555	15.8297	0.927085	TCONS_00021608	-	-	-	-	gi|5824319|emb|CAB54138.1|/2.10007e-11/hypothetical protein [Solanum tuberosum]
XLOC_001844|PGSC0003DMT400028618,PGSC0003DMT400028619	PGSC0003DMB000000008:1123364-1124490	15.7811	0.924616	TCONS_00003307	K00799|1|8e-69|148|vvi:100242547|glutathione S-transferase [EC:2.5.1.18]	-	GO:0016740//transferase activity	GO:0050896//response to stimulus	gi|460408228|ref|XP_004249548.1|/4.10558e-102/PREDICTED: probable glutathione S-transferase-like [Solanum lycopersicum]
XLOC_040412|-	PGSC0003DMB000002420:13-460	15.761	0.923536	TCONS_00070955	-	-	-	-	-
XLOC_029233|PGSC0003DMT400089961	PGSC0003DMB000000316:268786-269308	15.7585	0.923416	TCONS_00052267	K13448|1|3e-44|175|pop:POPTR_767565|calcium-binding protein CML	-	GO:0046872//metal ion binding;GO:0016491//oxidoreductase activity	-	gi|460375287|ref|XP_004233438.1|/1.23169e-90/PREDICTED: calmodulin-like protein 1-like [Solanum lycopersicum]
XLOC_025605|PGSC0003DMT400070942	PGSC0003DMB000000245:419675-420708	15.7546	0.923296	TCONS_00046018	-	-	-	-	-
XLOC_023315|PGSC0003DMT400046207	PGSC0003DMB000000208:671218-672397	15.7308	0.922079	TCONS_00042049	-	-	-	GO:0009628//response to abiotic stimulus;GO:0006979//response to oxidative stress	gi|460389822|ref|XP_004240547.1|/5.55728e-31/PREDICTED: late embryogenesis abundant protein Lea5-like [Solanum lycopersicum]
XLOC_029400|PGSC0003DMT400046308	PGSC0003DMB000000320:521440-523251	15.7262	0.921839	TCONS_00052552	-	-	GO:0016491//oxidoreductase activity	-	gi|460371465|ref|XP_004231557.1|/0/PREDICTED: reticuline oxidase-like protein-like [Solanum lycopersicum]
XLOC_034445|-	PGSC0003DMB000000478:243803-244058	15.7095	0.92093	TCONS_00061234	-	-	-	-	gi|9838433|ref|NP_064047.1|/2.50656e-09/orf169 gene product (mitochondrion) [Beta vulgaris subsp. vulgaris]
XLOC_023106|PGSC0003DMT400018670	PGSC0003DMB000000204:678395-705507	15.7046	0.920656	TCONS_00041668	K06892|1|9e-30|128|pop:POPTR_550478|;K05278|2|3e-29|126|mtr:MTR_5g059130|flavonol synthase [EC:1.14.11.23]	-	GO:0016706//oxidoreductase activity, acting on paired donors, with incorporation or reduction of molecular oxygen, 2-oxoglutarate as one donor, and incorporation of one atom each of oxygen into both donors;GO:0016701//oxidoreductase activity, acting on single donors with incorporation of molecular oxygen	GO:0051553	gi|460374401|ref|XP_004232999.1|/3.04836e-89/PREDICTED: protein SRG1-like [Solanum lycopersicum]
XLOC_039184|PGSC0003DMT400080759	PGSC0003DMB000000804:87553-92005	15.6958	0.920176	TCONS_00069288	K13496|1|3e-27|120|ath:AT2G36780|UDP-glucosyl transferase 73C [EC:2.4.1.-]	-	-	-	gi|460378310|ref|XP_004234916.1|/6.58888e-173/PREDICTED: cyanidin-3-O-glucoside 2-O-glucuronosyltransferase-like [Solanum lycopersicum]
XLOC_009472|PGSC0003DMT400007231	PGSC0003DMB000000060:1460216-1463454	15.6689	0.918924	TCONS_00017021	-	GO:0043231//intracellular membrane-bounded organelle	GO:0001071//nucleic acid binding transcription factor activity	-	gi|460368931|ref|XP_004230318.1|/3.84374e-88/PREDICTED: transcription factor bHLH149-like [Solanum lycopersicum]
XLOC_027165|PGSC0003DMT400046946	PGSC0003DMB000000277:356204-356846	15.6671	0.918753	TCONS_00048607	-	-	-	-	gi|460369049|ref|XP_004230377.1|/6.00862e-47/PREDICTED: uncharacterized protein LOC101244714 [Solanum lycopersicum]
XLOC_035263|PGSC0003DMT400040769,PGSC0003DMT400040770	PGSC0003DMB000000512:20901-69237	15.6622	0.91841	TCONS_00062782	K08202|1|3e-23|108|vcn:VOLCADRAFT_95576|MFS transporter, OCT family, solute carrier family 22 (organic cation transporter), member 4/5	GO:0016020//membrane	GO:0022891//substrate-specific transmembrane transporter activity	GO:0006810//transport	gi|460388378|ref|XP_004239844.1|/8.77029e-140/PREDICTED: organic cation/carnitine transporter 3-like [Solanum lycopersicum]
XLOC_028843|-	PGSC0003DMB000000308:571941-572220	15.6271	0.916404	TCONS_00051518	-	GO:0030529//ribonucleoprotein complex;GO:0009536//plastid	GO:0003723//RNA binding;GO:0005198//structural molecule activity	GO:0010467//gene expression	gi|57013937|ref|YP_173410.1|/4.58816e-35/ribosomal protein S3 [Nicotiana tabacum]
XLOC_016130|-	PGSC0003DMB000000117:214712-214913	15.6192	0.915838	TCONS_00029105	-	-	-	-	gi|357488217|ref|XP_003614396.1|/8.1745e-32/hypothetical protein MTR_5g051150 [Medicago truncatula]
XLOC_040352|PGSC0003DMT400006326	PGSC0003DMB000001795:506-1390	15.602	0.914449	TCONS_00070872	K01580|1|2e-48|188|aly:ARALYDRAFT_484123|glutamate decarboxylase [EC:4.1.1.15]	GO:0043231//intracellular membrane-bounded organelle;GO:0044444//cytoplasmic part	GO:0005515//protein binding;GO:0016831//carboxy-lyase activity;GO:0048037//cofactor binding	GO:0009064//glutamine family amino acid metabolic process	gi|460383060|ref|XP_004237250.1|/1.61108e-48/PREDICTED: glutamate decarboxylase 4-like [Solanum lycopersicum]
XLOC_002858|PGSC0003DMT400045068,PGSC0003DMT400045070	PGSC0003DMB000000013:162733-164258	15.595	0.914175	TCONS_00005222	-	GO:0031224//intrinsic to membrane;GO:0031410//cytoplasmic vesicle	-	-	gi|460415795|ref|XP_004253239.1|/2.97756e-42/PREDICTED: uncharacterized protein LOC101252673 [Solanum lycopersicum]
XLOC_008261|-	PGSC0003DMB000000048:2179117-2179529	15.5872	0.913661	TCONS_00014909	-	-	-	-	gi|460400175|ref|XP_004245611.1|/1.15167e-46/PREDICTED: uncharacterized protein LOC101259962 [Solanum lycopersicum]
XLOC_024201|PGSC0003DMT400080469	PGSC0003DMB000000222:112572-113132	15.5451	0.910935	TCONS_00043644	-	-	GO:0030414//peptidase inhibitor activity	-	gi|46396269|sp|P83241.1|IP23_CAPAN/1.80546e-19/RecName: Full=Proteinase inhibitor PSI-1.2
XLOC_021556|-	PGSC0003DMB000000177:1185873-1186119	15.5446	0.9109	TCONS_00039110	K06892|1|5e-06|43.5|pop:POPTR_550478|	-	GO:0016491//oxidoreductase activity	GO:0008152//metabolic process	gi|460402186|ref|XP_004246595.1|/2.95816e-31/PREDICTED: feruloyl CoA ortho-hydroxylase 1-like [Solanum lycopersicum]
XLOC_028258|PGSC0003DMT400030007	PGSC0003DMB000000296:69712-73654	15.5387	0.910746	TCONS_00050441	-	-	-	-	gi|460382261|ref|XP_004236858.1|/4.06397e-15/PREDICTED: putative GEM-like protein 8-like [Solanum lycopersicum]
XLOC_011349|PGSC0003DMT400056985	PGSC0003DMB000000076:807813-808578	15.4899	0.907797	TCONS_00020461	K09527|1|1e-10|64.7|cre:CHLREDRAFT_146571|DnaJ homolog subfamily C member 7;K09517|2|3e-10|63.9|pop:POPTR_572634|DnaJ homolog subfamily B member 11;K03686|5|4e-10|63.2|rcu:RCOM_0219890|molecular chaperone DnaJ	-	GO:0005515//protein binding	-	gi|460396912|ref|XP_004244014.1|/5.54036e-75/PREDICTED: chaperone protein dnaJ 11, chloroplastic-like [Solanum lycopersicum]
XLOC_012574|PGSC0003DMT400069324	PGSC0003DMB000000087:1124462-1125196	15.4874	0.907574	TCONS_00022545	-	-	-	-	gi|460393097|ref|XP_004242148.1|/5.87584e-103/PREDICTED: miraculin-like [Solanum lycopersicum]
XLOC_021462|PGSC0003DMT400055486	PGSC0003DMB000000177:182216-184617	15.4756	0.906871	TCONS_00038905	-	-	-	-	-
XLOC_018863|PGSC0003DMT400056380	PGSC0003DMB000000145:531340-531700	15.4439	0.904883	TCONS_00034106	-	-	-	-	gi|460387106|ref|XP_004239230.1|/1.77406e-31/PREDICTED: uncharacterized protein LOC101249266 [Solanum lycopersicum]
XLOC_001341|-	PGSC0003DMB000000005:4330716-4331010	15.4377	0.904454	TCONS_00002440	K11843|1|1e-22|70.9|pop:POPTR_597670|ubiquitin carboxyl-terminal hydrolase 14 [EC:3.1.2.15]	-	GO:0019783//small conjugating protein-specific protease activity;GO:0005515//protein binding;GO:0016790//thiolester hydrolase activity	GO:0070646//protein modification by small protein removal;GO:0019941//modification-dependent protein catabolic process	gi|460414017|ref|XP_004252371.1|/2.90689e-31/PREDICTED: ubiquitin carboxyl-terminal hydrolase 6-like [Solanum lycopersicum]
XLOC_009620|PGSC0003DMT400034163,PGSC0003DMT400034164	PGSC0003DMB000000061:1271640-1279661	15.3925	0.900922	TCONS_00017346	K02921|1|5e-47|187|vvi:100254103|large subunit ribosomal protein L37Ae	GO:0030529//ribonucleoprotein complex	GO:0043169//cation binding;GO:0005198//structural molecule activity	GO:0010467//gene expression	gi|462405499|gb|EMJ10963.1|/6.45507e-46/hypothetical protein PRUPE_ppa013350mg [Prunus persica]
XLOC_036233|PGSC0003DMT400030727,PGSC0003DMT400030728,PGSC0003DMT400030729,PGSC0003DMT400030732	PGSC0003DMB000000558:127279-132390	15.3685	0.898985	TCONS_00064470	K15015|1|2e-14|79.3|aly:ARALYDRAFT_486994|solute carrier family 32 (vesicular inhibitory amino acid transporter);K14209|3|9e-13|73.9|smo:SELMODRAFT_54913|solute carrier family 36 (proton-coupled amino acid transporter)	GO:0031224//intrinsic to membrane	-	-	gi|350538583|ref|NP_001234606.1|/0/amino acid transporter [Solanum lycopersicum]
XLOC_025647|PGSC0003DMT400012390,PGSC0003DMT400012393	PGSC0003DMB000000246:397541-400763	15.3601	0.898299	TCONS_00046087	-	GO:0031224//intrinsic to membrane;GO:0030529//ribonucleoprotein complex	GO:0005198//structural molecule activity	GO:0042742//defense response to bacterium;GO:0010467//gene expression;GO:0008219//cell death	gi|460392653|ref|XP_004241930.1|/5.12882e-40/PREDICTED: 60S ribosomal protein L18a-1-like [Solanum lycopersicum]
XLOC_013468|-	PGSC0003DMB000000095:1425052-1427433	15.3593	0.898248	TCONS_00024174	-	-	-	-	-
XLOC_013017|PGSC0003DMT400008504	PGSC0003DMB000000092:270929-273973	15.3577	0.898162	TCONS_00023295	K09754|1|0.0|914|rcu:RCOM_1106600|coumaroylquinate(coumaroylshikimate) 3'-monooxygenase [EC:1.14.13.36]	-	GO:0016709//oxidoreductase activity, acting on paired donors, with incorporation or reduction of molecular oxygen, NAD(P)H as one donor, and incorporation of one atom of oxygen;GO:0005506//iron ion binding	GO:0008152//metabolic process	gi|460368382|ref|XP_004230046.1|/0/PREDICTED: cytochrome P450 98A2-like [Solanum lycopersicum]
XLOC_021253|PGSC0003DMT400044192	PGSC0003DMB000000174:128804-134351	15.3557	0.898042	TCONS_00038567	-	-	-	-	gi|460404584|ref|XP_004247761.1|/2.09171e-40/PREDICTED: uncharacterized protein LOC101261364 [Solanum lycopersicum]
XLOC_017027|PGSC0003DMT400039535	PGSC0003DMB000000127:1460935-1461685	15.3458	0.897202	TCONS_00030728	-	-	-	-	gi|1762933|gb|AAC49969.1|/1.84914e-43/tumor-related protein [Nicotiana tabacum]
XLOC_030266|PGSC0003DMT400047537,PGSC0003DMT400047538	PGSC0003DMB000000341:107885-110624	15.3176	0.894956	TCONS_00054042	K09843|1|0.0|743|vvi:100264783|(+)-abscisic acid 8'-hydroxylase [EC:1.14.13.93]	-	GO:0016709//oxidoreductase activity, acting on paired donors, with incorporation or reduction of molecular oxygen, NAD(P)H as one donor, and incorporation of one atom of oxygen;GO:0005506//iron ion binding	GO:0006952//defense response;GO:0003006//developmental process involved in reproduction;GO:0006714//sesquiterpenoid metabolic process;GO:0009416//response to light stimulus	gi|76803519|gb|ABA55732.1|/0/ABA 8'-hydroxylase CYP707A1 [Solanum tuberosum]
XLOC_004408|PGSC0003DMT400023077,PGSC0003DMT400023078	PGSC0003DMB000000021:1171680-1176374	15.3076	0.894082	TCONS_00007926	K09287|1|2e-38|159|vvi:100262843|RAV-like factor	-	-	GO:0009628//response to abiotic stimulus	gi|460402761|ref|XP_004246879.1|/1.46413e-115/PREDICTED: B3 domain-containing protein At2g36080-like [Solanum lycopersicum]
XLOC_019490|-	PGSC0003DMB000000150:388832-391285	15.2896	0.892642	TCONS_00035379	K08081|1|7e-51|196|aly:ARALYDRAFT_481850|tropine dehydrogenase [EC:1.1.1.206]	-	GO:0016616//oxidoreductase activity, acting on the CH-OH group of donors, NAD or NADP as acceptor	GO:0006952//defense response;GO:0008152//metabolic process;GO:0032502//developmental process	gi|460393604|ref|XP_004242399.1|/3.32761e-70/PREDICTED: tropinone reductase homolog, partial [Solanum lycopersicum]
XLOC_040538|-	PGSC0003DMB000010623:9-262	15.2231	0.886452	TCONS_00071096	-	-	-	-	-
XLOC_016947|PGSC0003DMT400039333	PGSC0003DMB000000127:1334755-1345280	15.2183	0.886041	TCONS_00030559	K12309|1|0.0|801|ath:AT3G52840|beta-galactosidase [EC:3.2.1.23];K01190|3|7e-63|241|cme:CMP078C|beta-galactosidase [EC:3.2.1.23]	GO:0031410//cytoplasmic vesicle	GO:0030246//carbohydrate binding;GO:0043167//ion binding;GO:0015925	GO:0044238//primary metabolic process	gi|308550956|gb|ADO34792.1|/0/beta-galactosidase STBG7 [Solanum lycopersicum]
XLOC_007550|PGSC0003DMT400059525	PGSC0003DMB000000043:2225995-2226680	15.2021	0.884344	TCONS_00013585	K13448|1|3e-09|60.1|aly:ARALYDRAFT_889234|calcium-binding protein CML	-	-	-	gi|460364876|ref|XP_004228338.1|/2.89559e-37/PREDICTED: probable calcium-binding protein CML26-like [Solanum lycopersicum]
XLOC_039712|PGSC0003DMT400017153	PGSC0003DMB000000945:8787-9683	15.1919	0.883332	TCONS_00070054	K16083|1|4e-64|243|osa:4329725|cytochrome P450, family 71, subfamily Z, polypeptide 6 (ent-isokaurene C2-hydroxylase) [EC:1.14.13.143];K13267|2|2e-57|221|gmx:100814284|cytochrome P450, family 71, subfamily D, polypeptide 9 (flavonoid 6-hydroxylase) [EC:1.14.13.-];K00517|3|6e-55|212|ath:AT3G26300|[EC:1.14.-.-];K13029|4|1e-53|208|sbi:SORBI_01g001180|4-hydroxyphenylacetaldehyde oxime monooxygenase […	-	GO:0016491//oxidoreductase activity;GO:0005506//iron ion binding	GO:0008152//metabolic process	gi|460392871|ref|XP_004242036.1|/7.66841e-109/PREDICTED: premnaspirodiene oxygenase-like [Solanum lycopersicum]
XLOC_027773|PGSC0003DMT400064551,PGSC0003DMT400064554	PGSC0003DMB000000285:703309-705163	15.1491	0.879115	TCONS_00049673	K00430|1|8e-131|465|pop:POPTR_830144|peroxidase [EC:1.11.1.7]	-	GO:0005506//iron ion binding;GO:0003824//catalytic activity;GO:0016209//antioxidant activity	GO:0008152//metabolic process;GO:0006950//response to stress	gi|460384249|ref|XP_004237825.1|/3.55376e-175/PREDICTED: peroxidase 12-like [Solanum lycopersicum]
XLOC_022423|PGSC0003DMT400047400,PGSC0003DMT400047402,PGSC0003DMT400047403	PGSC0003DMB000000192:20279-24646	15.1456	0.878875	TCONS_00040537	-	GO:0031224//intrinsic to membrane	GO:0015291//secondary active transmembrane transporter activity	GO:0015698//inorganic anion transport	gi|460386284|ref|XP_004238829.1|/0/PREDICTED: probable sulfate transporter 3.3-like [Solanum lycopersicum]
XLOC_021681|-	PGSC0003DMB000000180:976749-993314	15.1227	0.876749	TCONS_00039292	-	-	-	-	gi|460393134|ref|XP_004242166.1|/1.15269e-46/PREDICTED: uncharacterized protein LOC101256497 [Solanum lycopersicum]
XLOC_032635|PGSC0003DMT400097155	PGSC0003DMB000000412:212793-213846	15.1187	0.876389	TCONS_00058134	-	-	-	-	gi|225436593|ref|XP_002275356.1|/1.22481e-42/PREDICTED: F-box protein At4g18380 [Vitis vinifera]
XLOC_005182|PGSC0003DMT400014615	PGSC0003DMB000000026:2368459-2369609	15.1131	0.875737	TCONS_00009332	-	-	-	-	gi|460380178|ref|XP_004235835.1|/1.55484e-42/PREDICTED: uncharacterized protein LOC101263098 [Solanum lycopersicum]
XLOC_034953|PGSC0003DMT400047957	PGSC0003DMB000000500:339883-342385	15.0968	0.874074	TCONS_00062180	K13473|1|2e-59|228|osa:4331523|chitin elicitor-binding protein;K13429|3|5e-07|54.3|ppp:PHYPADRAFT_1279|chitin elicitor receptor kinase 1	GO:0031225//anchored to membrane	-	-	gi|338815365|gb|AEJ08745.1|/0/RSI3 [Solanum tuberosum]
XLOC_023970|PGSC0003DMT400035055,PGSC0003DMT400035056,PGSC0003DMT400035057	PGSC0003DMB000000216:786969-790768	15.0786	0.872	TCONS_00043280	-	-	-	-	gi|460385938|ref|XP_004238657.1|/8.5943e-142/PREDICTED: probable inactive poly [ADP-ribose] polymerase SRO2-like [Solanum lycopersicum]
XLOC_011474|PGSC0003DMT400057302	PGSC0003DMB000000076:737250-740510	15.078	0.871983	TCONS_00020739	K06689|1|1e-82|303|zma:100281830|ubiquitin-conjugating enzyme E2 D/E [EC:6.3.2.19]	GO:0016020//membrane	GO:0019787//small conjugating protein ligase activity;GO:0032559	GO:0019941//modification-dependent protein catabolic process;GO:0032446//protein modification by small protein conjugation	gi|460396894|ref|XP_004244005.1|/1.60826e-82/PREDICTED: ubiquitin-conjugating enzyme E2 28-like [Solanum lycopersicum]
XLOC_019665|PGSC0003DMT400041703,PGSC0003DMT400041704,PGSC0003DMT400041705	PGSC0003DMB000000152:1009726-1017201	15.0746	0.871588	TCONS_00035747	K01179|1|2e-142|504|sbi:SORBI_01g008860|endoglucanase [EC:3.2.1.4]	-	GO:0004553//hydrolase activity, hydrolyzing O-glycosyl compounds	GO:0008152//metabolic process	gi|460409325|ref|XP_004250089.1|/0/PREDICTED: endoglucanase 12-like isoform 1 [Solanum lycopersicum]
XLOC_022211|PGSC0003DMT400064245,PGSC0003DMT400075806,PGSC0003DMT400075807,PGSC0003DMT400075808,PGSC0003DMT400075809	PGSC0003DMB000000189:1075889-1077729	15.0741	0.871537	TCONS_00040172	K07977|1|8e-85|211|aly:ARALYDRAFT_472612|Arf/Sar family, other	GO:0043231//intracellular membrane-bounded organelle;GO:0016020//membrane	GO:0003676//nucleic acid binding;GO:0060089;GO:0060229//lipase activator activity;GO:0001071//nucleic acid binding transcription factor activity;GO:0032561//guanyl ribonucleotide binding	GO:0035556//intracellular signal transduction;GO:0010038//response to metal ion;GO:0009725//response to hormone stimulus;GO:0006355//regulation of transcription, DNA-dependent;GO:0010260//organ senescence	gi|460372118|ref|XP_004231879.1|/2.09225e-92/PREDICTED: ADP-ribosylation factor 2-B-like [Solanum lycopersicum]
XLOC_001158|PGSC0003DMT400052057	PGSC0003DMB000000004:3937020-3938886	15.0718	0.87128	TCONS_00002124	K13424|1|9e-25|112|sbi:SORBI_09g023270|WRKY transcription factor 33;K13423|5|2e-24|110|ath:AT2G30250|WRKY transcription factor 25	GO:0043231//intracellular membrane-bounded organelle	GO:0003677//DNA binding;GO:0001071//nucleic acid binding transcription factor activity	GO:0010467//gene expression	gi|460375585|ref|XP_004233585.1|/2.28772e-53/PREDICTED: probable WRKY transcription factor 75-like [Solanum lycopersicum]
XLOC_009188|-	PGSC0003DMB000000056:2013756-2014751	15.0701	0.871074	TCONS_00016496	-	-	-	-	-
XLOC_016001|-	PGSC0003DMB000000116:422925-423287	15.0698	0.871074	TCONS_00028912	K15280|1|5e-06|47.4|pop:POPTR_828282|solute carrier family 35, member C2	-	-	-	gi|460413433|ref|XP_004252093.1|/2.24681e-13/PREDICTED: probable sugar phosphate/phosphate translocator At1g06470-like [Solanum lycopersicum]
XLOC_010866|PGSC0003DMT400060313	PGSC0003DMB000000072:472881-477420	15.0695	0.871074	TCONS_00019491	K08907|1|5e-108|390|rcu:RCOM_0333020|light-harvesting complex I chlorophyll a/b binding protein 1	GO:0031224//intrinsic to membrane;GO:0009521;GO:0009526//plastid envelope;GO:0009534//chloroplast thylakoid;GO:0009570//chloroplast stroma	GO:0043169//cation binding;GO:0046906//tetrapyrrole binding	GO:0009765//photosynthesis, light harvesting;GO:0009639//response to red or far red light;GO:0006464//cellular protein modification process	gi|170388|gb|AAA34140.1|/1.44754e-123/chlorophyll a/b-binding protein [Solanum lycopersicum]
XLOC_015256|-	PGSC0003DMB000000108:1632925-1635711	15.0695	0.871074	TCONS_00027618	-	-	-	-	-
XLOC_035437|PGSC0003DMT400040969,PGSC0003DMT400040970,PGSC0003DMT400040971	PGSC0003DMB000000522:162551-164243	15.0611	0.870148	TCONS_00063064	-	GO:0043231//intracellular membrane-bounded organelle	-	GO:0009267//cellular response to starvation	gi|350537355|ref|NP_001234034.1|/5.8645e-64/IDS4-like protein [Solanum lycopersicum]
XLOC_006291|PGSC0003DMT400075566	PGSC0003DMB000000034:839984-841850	15.0365	0.867868	TCONS_00011342	K15121|1|4e-78|290|smo:SELMODRAFT_413389|solute carrier family 25, member 44	GO:0019866//organelle inner membrane	-	GO:0046907//intracellular transport	gi|460415488|ref|XP_004253090.1|/1.17216e-159/PREDICTED: solute carrier family 25 member 44-like [Solanum lycopersicum]
XLOC_016928|PGSC0003DMT400039298,PGSC0003DMT400039555	PGSC0003DMB000000127:990822-996393	15.0138	0.865519	TCONS_00030518	-	-	-	-	gi|460381224|ref|XP_004236352.1|/2.97718e-79/PREDICTED: uncharacterized protein LOC101244174 [Solanum lycopersicum]
XLOC_027530|PGSC0003DMT400039661,PGSC0003DMT400039815	PGSC0003DMB000000283:185552-187527	15.0062	0.864799	TCONS_00049213	K06636|1|6e-18|90.5|ppp:PHYPADRAFT_79481|structural maintenance of chromosome 1	-	-	-	gi|460397458|ref|XP_004244284.1|/7.94881e-78/PREDICTED: uncharacterized protein LOC101246157 [Solanum lycopersicum]
XLOC_033940|PGSC0003DMT400013401,PGSC0003DMT400013402,PGSC0003DMT400013403	PGSC0003DMB000000457:444137-448269	15.0044	0.864696	TCONS_00060361	-	-	-	-	gi|460365079|ref|XP_004228433.1|/0/PREDICTED: glycerophosphodiester phosphodiesterase GDE1-like [Solanum lycopersicum]
XLOC_003972|PGSC0003DMT400009228,PGSC0003DMT400009229	PGSC0003DMB000000020:1555544-1566896	14.9788	0.861799	TCONS_00007034	K06689|1|9e-77|286|gmx:100499824|ubiquitin-conjugating enzyme E2 D/E [EC:6.3.2.19]	-	GO:0019899//enzyme binding;GO:0019787//small conjugating protein ligase activity;GO:0032559	GO:0019941//modification-dependent protein catabolic process;GO:0032446//protein modification by small protein conjugation	gi|460373401|ref|XP_004232508.1|/1.13892e-83/PREDICTED: ubiquitin-conjugating enzyme E2 5A-like isoform 1 [Solanum lycopersicum]
XLOC_027744|PGSC0003DMT400064515	PGSC0003DMB000000285:669513-671933	14.9707	0.860787	TCONS_00049620	-	GO:0009534//chloroplast thylakoid	-	GO:0009416//response to light stimulus	gi|460384253|ref|XP_004237827.1|/1.95715e-62/PREDICTED: uncharacterized protein LOC101253996 [Solanum lycopersicum]
XLOC_000289|PGSC0003DMT400071355,PGSC0003DMT400071356,PGSC0003DMT400071357	PGSC0003DMB000000002:3402505-3409674	14.9486	0.858387	TCONS_00000437	-	-	-	-	gi|460387302|ref|XP_004239318.1|/1.2047e-58/PREDICTED: uncharacterized protein LOC101263025 [Solanum lycopersicum]
XLOC_002752|PGSC0003DMT400064269,PGSC0003DMT400064270	PGSC0003DMB000000012:90900-155933	14.9126	0.853775	TCONS_00005036	K00430|1|4e-143|506|rcu:RCOM_0578390|peroxidase [EC:1.11.1.7]	-	GO:0005506//iron ion binding;GO:0003824//catalytic activity;GO:0016209//antioxidant activity	GO:0008152//metabolic process;GO:0006950//response to stress	gi|460372177|ref|XP_004231908.1|/2.36827e-180/PREDICTED: peroxidase 73-like [Solanum lycopersicum]
XLOC_025652|PGSC0003DMT400012412,PGSC0003DMT400012413,PGSC0003DMT400012414	PGSC0003DMB000000246:480414-482598	14.9095	0.853449	TCONS_00046105	K05658|1|2e-96|191|vvi:100262734|ATP-binding cassette, subfamily B (MDR/TAP), member 1;K00924|3|2e-89|176|osa:4337593|[EC:2.7.1.-]	-	GO:0004672//protein kinase activity;GO:0032559	GO:0006464//cellular protein modification process	gi|350537699|ref|NP_001234561.1|/0/auxin-regulated dual specificity cytosolic kinase [Solanum lycopersicum]
XLOC_033522|PGSC0003DMT400055177,PGSC0003DMT400055179	PGSC0003DMB000000441:368113-373202	14.9092	0.853449	TCONS_00059685	-	-	-	-	gi|460372223|ref|XP_004231931.1|/0/PREDICTED: F-box/LRR-repeat protein At3g03360-like [Solanum lycopersicum]
XLOC_035549|PGSC0003DMT400024403	PGSC0003DMB000000528:53184-56349	14.9038	0.852781	TCONS_00063256	K13154|1|2e-14|77.4|rcu:RCOM_0721970|U11/U12 small nuclear ribonucleoprotein 31 kDa protein	GO:0043231//intracellular membrane-bounded organelle	GO:0003676//nucleic acid binding	-	gi|460374934|ref|XP_004233263.1|/2.82123e-67/PREDICTED: cold-inducible RNA-binding protein-like [Solanum lycopersicum]
XLOC_026659|PGSC0003DMT400049954	PGSC0003DMB000000267:615521-619140	14.8845	0.850706	TCONS_00047721	K10255|1|2e-06|50.4|vvi:100248377|omega-6 fatty acid desaturase (delta-12 desaturase) [EC:1.14.19.-]	-	-	-	gi|460379123|ref|XP_004235314.1|/1.02006e-07/PREDICTED: E3 ubiquitin-protein ligase synoviolin-like [Solanum lycopersicum]
XLOC_038201|PGSC0003DMT400011101,PGSC0003DMT400011102	PGSC0003DMB000000689:191526-194165	14.8818	0.850346	TCONS_00067678	K16040|1|2e-58|134|vvi:100233030|trans-resveratrol di-O-methyltransferase [EC:2.1.1.240];K13230|3|3e-32|82.8|zma:100147731|2,4,7-trihydroxy-1,4-benzoxazin-3-one-glucoside 7-O-methyltransferase [EC:2.1.1.241];K05279|5|1e-22|74.3|pop:POPTR_834247|flavonol 3-O-methyltransferase [EC:2.1.1.76]	-	-	-	gi|460414215|ref|XP_004252468.1|/1.22902e-68/PREDICTED: trans-resveratrol di-O-methyltransferase-like [Solanum lycopersicum]
XLOC_031707|PGSC0003DMT400015570,PGSC0003DMT400015571,PGSC0003DMT400015572	PGSC0003DMB000000384:119729-126000	14.8687	0.848786	TCONS_00056594	-	GO:0016020//membrane	GO:0005488//binding	GO:0009926//auxin polar transport;GO:0050832//defense response to fungus;GO:0048528//post-embryonic root development	gi|460404290|ref|XP_004247616.1|/3.33778e-30/PREDICTED: guanine nucleotide-binding protein subunit gamma 2-like [Solanum lycopersicum]
XLOC_039420|PGSC0003DMT400005547	PGSC0003DMB000000848:71567-72891	14.8619	0.847637	TCONS_00069624	K00799|1|7e-65|245|vvi:100242547|glutathione S-transferase [EC:2.5.1.18]	-	GO:0016765//transferase activity, transferring alkyl or aryl (other than methyl) groups	GO:0006950//response to stress;GO:0009755//hormone-mediated signaling pathway	gi|60459397|gb|AAX20044.1|/1.59301e-99/probable glutathione-S-transferase [Capsicum annuum]
XLOC_026711|PGSC0003DMT400013484	PGSC0003DMB000000268:215212-233237	14.8544	0.846729	TCONS_00047809	-	GO:0009526//plastid envelope	GO:0003824//catalytic activity	-	gi|460378910|ref|XP_004235210.1|/8.77843e-109/PREDICTED: uncharacterized protein LOC101249441 [Solanum lycopersicum]
XLOC_001609|PGSC0003DMT400028833	PGSC0003DMB000000008:836076-838966	14.8526	0.846437	TCONS_00002820	K14431|1|1e-20|99.0|bdi:100841317|transcription factor TGA	-	-	-	gi|460408783|ref|XP_004249821.1|/6.4318e-108/PREDICTED: transcription factor TGA6-like [Solanum lycopersicum]
XLOC_040486|-	PGSC0003DMB000005085:76-563	14.8347	0.844089	TCONS_00071042	K03064|1|2e-51|198|aly:ARALYDRAFT_891428|26S proteasome regulatory subunit T4	GO:0030312//external encapsulating structure;GO:0031981//nuclear lumen;GO:0005838//proteasome regulatory particle;GO:0016020//membrane	GO:0042623//ATPase activity, coupled;GO:0032559	GO:0019941//modification-dependent protein catabolic process	gi|460370063|ref|XP_004230874.1|/1.02735e-50/PREDICTED: 26S protease regulatory subunit S10B homolog B-like [Solanum lycopersicum]
XLOC_014653|PGSC0003DMT400072882	PGSC0003DMB000000103:930444-931163	14.8261	0.842871	TCONS_00026456	-	-	-	-	gi|460386684|ref|XP_004239026.1|/1.27339e-54/PREDICTED: uncharacterized protein LOC101261117 [Solanum lycopersicum]
XLOC_027583|PGSC0003DMT400039668,PGSC0003DMT400039669,PGSC0003DMT400039670	PGSC0003DMB000000283:822921-825609	14.8258	0.842786	TCONS_00049318	-	GO:0043231//intracellular membrane-bounded organelle	GO:0003676//nucleic acid binding;GO:0001071//nucleic acid binding transcription factor activity	GO:0009725//response to hormone stimulus;GO:0006950//response to stress	gi|51871853|gb|AAU12055.1|/2.12355e-141/jasmonic acid 2 [Solanum tuberosum]
XLOC_033731|PGSC0003DMT400041077	PGSC0003DMB000000446:284147-286982	14.797	0.839528	TCONS_00060064	-	GO:0043231//intracellular membrane-bounded organelle	-	-	gi|460408563|ref|XP_004249713.1|/0/PREDICTED: uncharacterized protein LOC101268733 [Solanum lycopersicum]
XLOC_013466|-	PGSC0003DMB000000095:1411215-1413503	14.7654	0.834539	TCONS_00024172	-	-	-	-	-
XLOC_009804|PGSC0003DMT400063187,PGSC0003DMT400063188	PGSC0003DMB000000062:213508-215537	14.7653	0.834539	TCONS_00017686	K14492|1|7e-63|239|vvi:100258759|two-component response regulator ARR-A family	GO:0043231//intracellular membrane-bounded organelle	GO:0016772//transferase activity, transferring phosphorus-containing groups;GO:0005488//binding;GO:0004871//signal transducer activity	GO:0006796//phosphate-containing compound metabolic process;GO:0009743//response to carbohydrate stimulus;GO:0009755//hormone-mediated signaling pathway;GO:0006351//transcription, DNA-dependent;GO:0032502//developmental process	gi|460380828|ref|XP_004236156.1|/6.07608e-93/PREDICTED: two-component response regulator ARR6-like [Solanum lycopersicum]
XLOC_039225|PGSC0003DMT400041273,PGSC0003DMT400041276	PGSC0003DMB000000814:33783-36355	14.7535	0.833099	TCONS_00069350	K13428|1|9e-53|118|ath:AT5G20480|LRR receptor-like serine/threonine-protein kinase EFR [EC:2.7.11.1];K13420|5|8e-51|100|aly:ARALYDRAFT_356368|LRR receptor-like serine/threonine-protein kinase FLS2 [EC:2.7.11.1]	GO:0016020//membrane	GO:0004672//protein kinase activity;GO:0000166//nucleotide binding	-	gi|460376930|ref|XP_004234249.1|/4.78176e-158/PREDICTED: probable LRR receptor-like serine/threonine-protein kinase At3g47570-like [Solanum lycopersicum]
XLOC_031030|PGSC0003DMT400053574	PGSC0003DMB000000364:49322-53217	14.7516	0.83279	TCONS_00055429	-	-	-	-	gi|113205142|gb|AAT40504.2|/4.28501e-12/Polyprotein, putative [Solanum demissum]
XLOC_029160|PGSC0003DMT400043672	PGSC0003DMB000000314:693426-694368	14.7386	0.831145	TCONS_00052105	K02113|1|3e-74|276|vvi:100251062|F-type H+-transporting ATPase subunit delta [EC:3.6.3.14]	GO:0009526//plastid envelope;GO:0009534//chloroplast thylakoid;GO:0009570//chloroplast stroma;GO:0033178//proton-transporting two-sector ATPase complex, catalytic domain	GO:0015078//hydrogen ion transmembrane transporter activity	GO:0006952//defense response;GO:0006818//hydrogen transport;GO:0009767//photosynthetic electron transport chain;GO:0006754//ATP biosynthetic process	gi|460414390|ref|XP_004252554.1|/4.90904e-109/PREDICTED: ATP synthase delta chain, chloroplastic-like [Solanum lycopersicum]
XLOC_019823|-	PGSC0003DMB000000154:680749-681439	14.7351	0.830682	TCONS_00036030	-	-	-	-	gi|460377195|ref|XP_004234380.1|/5.24032e-80/PREDICTED: F-box/LRR-repeat protein At3g48880-like isoform 1 [Solanum lycopersicum]
XLOC_000976|PGSC0003DMT400003460	PGSC0003DMB000000004:1337301-1337960	14.7185	0.828676	TCONS_00001710	-	-	-	-	gi|37695577|gb|AAR00328.1|/2.7404e-42/rapid alkalinization factor 4 [Solanum chacoense]
XLOC_005027|PGSC0003DMT400014526,PGSC0003DMT400014529	PGSC0003DMB000000026:2856694-2859965	14.7144	0.828041	TCONS_00008955	K03453|1|1e-12|73.2|vcn:VOLCADRAFT_102664|bile acid:Na+ symporter, BASS family	-	-	-	gi|460379933|ref|XP_004235713.1|/0/PREDICTED: uncharacterized protein LOC101251365 [Solanum lycopersicum]
XLOC_025181|PGSC0003DMT400024630,PGSC0003DMT400024631,PGSC0003DMT400024632,PGSC0003DMT400024633	PGSC0003DMB000000240:375227-376886	14.7053	0.826687	TCONS_00045200	K13425|1|9e-19|93.6|rcu:RCOM_1616660|WRKY transcription factor 22;K13426|4|2e-16|85.5|rcu:RCOM_1689100|WRKY transcription factor 29	-	GO:0005515//protein binding	GO:0006952//defense response;GO:0009743//response to carbohydrate stimulus	gi|156118322|gb|ABU49722.1|/6.60449e-137/WRKY transcription factor 3 [Solanum tuberosum]
XLOC_039411|PGSC0003DMT400005527,PGSC0003DMT400005528,PGSC0003DMT400005529,PGSC0003DMT400005530	PGSC0003DMB000000848:1634-5260	14.6999	0.825847	TCONS_00069608	-	-	-	-	gi|460401773|ref|XP_004246390.1|/1.89476e-38/PREDICTED: uncharacterized protein LOC101243814 isoform 1 [Solanum lycopersicum]
XLOC_033318|PGSC0003DMT400040210	PGSC0003DMB000000433:335763-345308	14.6908	0.824818	TCONS_00059335	-	-	-	-	gi|147858037|emb|CAN80354.1|/2.468e-82/hypothetical protein VITISV_003142 [Vitis vinifera]
XLOC_037570|PGSC0003DMT400059603,PGSC0003DMT400059604,PGSC0003DMT400059605	PGSC0003DMB000000642:94858-99808	14.6885	0.824561	TCONS_00066676	-	-	GO:0070011//peptidase activity, acting on L-amino acid peptides	GO:0019538//protein metabolic process	gi|460415809|ref|XP_004253246.1|/0/PREDICTED: uncharacterized protein LOC101254774 [Solanum lycopersicum]
XLOC_010727|PGSC0003DMT400059950	PGSC0003DMB000000072:203784-205355	14.6686	0.821561	TCONS_00019202	K14431|1|3e-11|67.8|bdi:100841317|transcription factor TGA	-	-	-	gi|460387963|ref|XP_004239641.1|/5.12714e-103/PREDICTED: TGACG-sequence-specific DNA-binding protein TGA-2.1-like [Solanum lycopersicum]
XLOC_013304|PGSC0003DMT400001501,PGSC0003DMT400001502,PGSC0003DMT400001503	PGSC0003DMB000000093:439294-442121	14.6638	0.820961	TCONS_00023882	K07213|1|2e-07|55.8|ppp:PHYPADRAFT_187462|copper chaperone	-	GO:0043169//cation binding	GO:0000041//transition metal ion transport	gi|460378551|ref|XP_004235034.1|/9.81245e-103/PREDICTED: uncharacterized protein LOC101253261 [Solanum lycopersicum]
XLOC_037891|PGSC0003DMT400016769	PGSC0003DMB000000667:63023-67679	14.6497	0.818818	TCONS_00067165	-	-	-	-	gi|460364979|ref|XP_004228383.1|/1.10894e-100/PREDICTED: probable ran guanine nucleotide release factor-like isoform 2 [Solanum lycopersicum]
XLOC_000472|-	PGSC0003DMB000000002:324449-324888	14.6429	0.817652	TCONS_00000683	-	-	-	-	gi|357481379|ref|XP_003610975.1|/2.09915e-16/Phosphatidylinositol 4-kinase type 2-beta [Medicago truncatula]
XLOC_020031|-	PGSC0003DMB000000155:117829-118673	14.639	0.81712	TCONS_00036459	-	GO:0043231//intracellular membrane-bounded organelle	-	GO:0048513//organ development	gi|224143475|ref|XP_002324968.1|/3.33937e-10/predicted protein [Populus trichocarpa]
XLOC_027983|-	PGSC0003DMB000000290:237744-238784	14.638	0.817086	TCONS_00049995	K14488|1|2e-27|121|vvi:100240974|SAUR family protein	-	-	-	gi|460370279|ref|XP_004230981.1|/1.21078e-34/PREDICTED: auxin-induced protein 15A-like [Solanum lycopersicum]
XLOC_033529|PGSC0003DMT400055194,PGSC0003DMT400055196,PGSC0003DMT400055197	PGSC0003DMB000000441:465877-468817	14.6258	0.814703	TCONS_00059703	K00517|1|5e-20|98.6|aly:ARALYDRAFT_323436|[EC:1.14.-.-];K04498|5|7e-12|71.6|ppp:PHYPADRAFT_10108|E1A/CREB-binding protein [EC:2.3.1.48]	GO:0043231//intracellular membrane-bounded organelle;GO:0031090//organelle membrane	GO:0005515//protein binding	GO:0009725//response to hormone stimulus;GO:0000302//response to reactive oxygen species;GO:0006970//response to osmotic stress	gi|460372197|ref|XP_004231918.1|/4.69487e-68/PREDICTED: BTB/POZ and TAZ domain-containing protein 4-like isoform 2 [Solanum lycopersicum]
XLOC_002471|PGSC0003DMT400000587,PGSC0003DMT400000588	PGSC0003DMB000000010:2988595-2991338	14.621	0.813949	TCONS_00004551	-	-	GO:0046914//transition metal ion binding	-	gi|460368229|ref|XP_004229970.1|/2.15933e-105/PREDICTED: uncharacterized protein LOC101248615 [Solanum lycopersicum]
XLOC_021833|-	PGSC0003DMB000000182:1060580-1060909	14.6209	0.813829	TCONS_00039563	-	-	-	-	gi|57013901|ref|YP_173375.1|/1.19221e-19/hypothetical protein NitaMp028 [Nicotiana tabacum]
XLOC_010746|PGSC0003DMT400059995	PGSC0003DMB000000072:487156-489683	14.62	0.81376	TCONS_00019247	K08907|1|9e-115|411|rcu:RCOM_0333020|light-harvesting complex I chlorophyll a/b binding protein 1	GO:0031224//intrinsic to membrane;GO:0009521;GO:0009526//plastid envelope;GO:0009534//chloroplast thylakoid;GO:0009570//chloroplast stroma	GO:0043169//cation binding;GO:0046906//tetrapyrrole binding	GO:0009765//photosynthesis, light harvesting;GO:0009639//response to red or far red light;GO:0006464//cellular protein modification process	gi|460388027|ref|XP_004239673.1|/4.3205e-129/PREDICTED: chlorophyll a-b binding protein 6A, chloroplastic-like [Solanum lycopersicum]
XLOC_020629|PGSC0003DMT400070836	PGSC0003DMB000000164:1085966-1089650	14.6195	0.813726	TCONS_00037493	-	-	GO:0009975//cyclase activity;GO:0005506//iron ion binding	GO:0006164//purine nucleotide biosynthetic process;GO:0009725//response to hormone stimulus;GO:0003006//developmental process involved in reproduction	gi|460384322|ref|XP_004237861.1|/3.78134e-97/PREDICTED: trafficking protein particle complex subunit 6B-like [Solanum lycopersicum]
XLOC_018429|PGSC0003DMT400074142,PGSC0003DMT400074143,PGSC0003DMT400074144,PGSC0003DMT400074145	PGSC0003DMB000000140:986178-993883	14.6113	0.812337	TCONS_00033307	K12135|1|3e-13|75.9|ath:AT5G15840|zinc finger protein CONSTANS	-	-	-	gi|460412319|ref|XP_004251549.1|/0/PREDICTED: zinc finger protein CONSTANS-LIKE 9-like [Solanum lycopersicum]
XLOC_021881|PGSC0003DMT400020517,PGSC0003DMT400020518	PGSC0003DMB000000184:102432-104093	14.6108	0.812234	TCONS_00039626	K13425|1|4e-20|97.8|rcu:RCOM_1616660|WRKY transcription factor 22;K13426|2|1e-19|96.3|vvi:100251862|WRKY transcription factor 29	-	-	-	gi|156118320|gb|ABU49721.1|/6.24666e-163/WRKY transcription factor 2 [Solanum tuberosum]
XLOC_020022|PGSC0003DMT400000749	PGSC0003DMB000000155:1166653-1170344	14.6028	0.810811	TCONS_00036430	-	-	-	-	gi|225444877|ref|XP_002281464.1|/1.09045e-39/PREDICTED: uncharacterized protein LOC100256150 [Vitis vinifera]
XLOC_010418|-	PGSC0003DMB000000068:818013-818664	14.6019	0.81076	TCONS_00018709	-	-	-	-	-
XLOC_025686|-	PGSC0003DMB000000246:118711-131076	14.5878	0.80884	TCONS_00046173	K04354|1|0.0|806|vvi:100265267|protein phosphatase 2 (formerly 2A), regulatory subunit B	GO:0008287//protein serine/threonine phosphatase complex	GO:0019888//protein phosphatase regulator activity	GO:0006464//cellular protein modification process;GO:0023052//signaling	gi|460392675|ref|XP_004241940.1|/0/PREDICTED: serine/threonine protein phosphatase 2A 55 kDa regulatory subunit B beta isoform-like [Solanum lycopersicum]
XLOC_024196|PGSC0003DMT400034343	PGSC0003DMB000000221:855984-856675	14.5825	0.808017	TCONS_00043639	-	GO:0043231//intracellular membrane-bounded organelle	-	-	gi|57014020|ref|YP_173491.1|/1.81471e-55/hypothetical protein NitaMp154 [Nicotiana tabacum]
XLOC_015950|-	PGSC0003DMB000000116:1279385-1290313	14.5677	0.805839	TCONS_00028822	K01658|1|3e-106|383|rcu:RCOM_1150020|anthranilate synthase component II [EC:4.1.3.27]	-	GO:0016833//oxo-acid-lyase activity	GO:0051707//response to other organism;GO:0009725//response to hormone stimulus;GO:0009850//auxin metabolic process;GO:0009064//glutamine family amino acid metabolic process;GO:0006568//tryptophan metabolic process;GO:0006970//response to osmotic stress;GO:0048527//lateral root development	gi|460412747|ref|XP_004251759.1|/1.72066e-156/PREDICTED: anthranilate synthase component II-like [Solanum lycopersicum]
XLOC_032689|PGSC0003DMT400015760	PGSC0003DMB000000413:382806-399701	14.5583	0.804382	TCONS_00058238	-	-	-	-	gi|460395945|ref|XP_004243540.1|/0/PREDICTED: uncharacterized protein LOC101250320 [Solanum lycopersicum]
XLOC_037559|PGSC0003DMT400044066	PGSC0003DMB000000641:179075-179739	14.5577	0.804382	TCONS_00066660	K13993|1|9e-35|144|gmx:100809611|HSP20 family protein	-	-	-	gi|356496106|ref|XP_003516911.1|/1.06485e-33/PREDICTED: 18.2 kDa class I heat shock protein-like [Glycine max]
XLOC_008105|-	PGSC0003DMB000000048:2177884-2178982	14.5462	0.802582	TCONS_00014597	-	-	-	-	gi|460400175|ref|XP_004245611.1|/6.5083e-44/PREDICTED: uncharacterized protein LOC101259962 [Solanum lycopersicum]
XLOC_016087|-	PGSC0003DMB000000116:1133407-1172315	14.5379	0.801296	TCONS_00029062	K02952|1|2e-24|108|rcu:RCOM_Mp20|small subunit ribosomal protein S13	GO:0043231//intracellular membrane-bounded organelle;GO:0030529//ribonucleoprotein complex	GO:0003723//RNA binding;GO:0005198//structural molecule activity	GO:0010467//gene expression	gi|57013930|ref|YP_173403.1|/1.45818e-25/ribosomal protein S13 [Nicotiana tabacum]
XLOC_026871|PGSC0003DMT400079450	PGSC0003DMB000000272:171033-182083	13.8825	0.8086	TCONS_00048068	-	-	-	-	gi|460394371|ref|XP_004242777.1|/3.74532e-134/PREDICTED: uncharacterized protein LOC101247233 [Solanum lycopersicum]
XLOC_006821|PGSC0003DMT400012962	PGSC0003DMB000000039:797037-797860	8.65386	0.82307	TCONS_00012241	-	-	GO:0046872//metal ion binding	-	gi|460377384|ref|XP_004234473.1|/1.34191e-59/PREDICTED: uncharacterized protein LOC101252752 [Solanum lycopersicum]
XLOC_029737|PGSC0003DMT400036329	PGSC0003DMB000000328:606224-610497	7.9267	0.803268	TCONS_00053141	K08235|1|4e-122|436|vvi:100241119|xyloglucan:xyloglucosyl transferase [EC:2.4.1.207];K14504|5|2e-119|427|vvi:100256520|xyloglucan:xyloglucosyl transferase TCH4 [EC:2.4.1.207]	GO:0005576//extracellular region;GO:0030312//external encapsulating structure	GO:0016798//hydrolase activity, acting on glycosyl bonds;GO:0016758//transferase activity, transferring hexosyl groups	GO:0044042//glucan metabolic process	gi|460388959|ref|XP_004240131.1|/1.83425e-143/PREDICTED: probable xyloglucan endotransglucosylase/hydrolase protein 23-like [Solanum lycopersicum]
XLOC_013697|PGSC0003DMT400018218	PGSC0003DMB000000096:914952-916136	7.73278	0.820464	TCONS_00024643	-	-	-	GO:0042044//fluid transport	gi|460397440|ref|XP_004244275.1|/4.6431e-166/PREDICTED: epidermis-specific secreted glycoprotein EP1-like [Solanum lycopersicum]
XLOC_005948|PGSC0003DMT400025784,PGSC0003DMT400025786	PGSC0003DMB000000032:1715145-1719243	7.67826	0.804502	TCONS_00010674	-	-	-	-	gi|460385399|ref|XP_004238391.1|/1.99713e-81/PREDICTED: uncharacterized protein At1g76070-like [Solanum lycopersicum]
XLOC_028055|PGSC0003DMT400067459	PGSC0003DMB000000292:170049-171920	7.6317	0.81736	TCONS_00050126	-	-	-	-	gi|460400601|ref|XP_004245822.1|/2.38666e-146/PREDICTED: expansin-like B1-like [Solanum lycopersicum]
XLOC_015542|PGSC0003DMT400021349	PGSC0003DMB000000112:1151150-1152059	7.51606	0.808445	TCONS_00028103	-	-	-	-	-
XLOC_000971|PGSC0003DMT400003472,PGSC0003DMT400003473	PGSC0003DMB000000004:1297708-1298710	7.43736	0.818423	TCONS_00001700	-	GO:0031410//cytoplasmic vesicle	-	-	gi|460372648|ref|XP_004232140.1|/6.54669e-41/PREDICTED: uncharacterized protein LOC101252543 [Solanum lycopersicum]
XLOC_015135|PGSC0003DMT400049412	PGSC0003DMB000000106:1036015-1036767	7.42094	0.816109	TCONS_00027437	-	-	-	-	gi|460408519|ref|XP_004249692.1|/1.1755e-21/PREDICTED: uncharacterized protein LOC101257229 [Solanum lycopersicum]
XLOC_014395|PGSC0003DMT400024317	PGSC0003DMB000000102:172154-172846	7.4116	0.809371	TCONS_00026004	K03676|1|2e-07|53.9|bdi:100821530|glutaredoxin 3	-	GO:0005488//binding	GO:0007165//signal transduction;GO:0010033//response to organic substance	gi|460395641|ref|XP_004243390.1|/1.87359e-60/PREDICTED: glutaredoxin-C9-like isoform 1 [Solanum lycopersicum]
XLOC_003960|PGSC0003DMT400009207,PGSC0003DMT400009208,PGSC0003DMT400009209,PGSC0003DMT400009210,PGSC0003DMT400009211	PGSC0003DMB000000020:1449673-1451166	7.3627	0.820875	TCONS_00007012	-	-	-	GO:0032502//developmental process	gi|460373384|ref|XP_004232500.1|/5.8849e-34/PREDICTED: thiosulfate sulfurtransferase 18-like [Solanum lycopersicum]
XLOC_013602|PGSC0003DMT400018296	PGSC0003DMB000000096:924300-925472	7.09257	0.805119	TCONS_00024453	-	-	-	GO:0042044//fluid transport	gi|460397442|ref|XP_004244276.1|/1.42503e-159/PREDICTED: epidermis-specific secreted glycoprotein EP1-like [Solanum lycopersicum]
XLOC_012333|PGSC0003DMT400027943	PGSC0003DMB000000086:417342-418430	7.04489	0.819332	TCONS_00022179	-	-	-	-	gi|460381992|ref|XP_004236724.1|/3.54039e-19/PREDICTED: uncharacterized protein LOC101253883 [Solanum lycopersicum]
XLOC_019866|PGSC0003DMT400037076,PGSC0003DMT400037077	PGSC0003DMB000000154:401603-420412	6.73146	0.821355	TCONS_00036103	K14397|1|2e-109|394|vvi:100261950|cleavage and polyadenylation specificity factor subunit 5	GO:0043231//intracellular membrane-bounded organelle	GO:0003824//catalytic activity	-	gi|460377212|ref|XP_004234388.1|/7.17535e-113/PREDICTED: cleavage and polyadenylation specificity factor subunit 5-like [Solanum lycopersicum]
XLOC_035240|PGSC0003DMT400053289,PGSC0003DMT400053290,PGSC0003DMT400053291	PGSC0003DMB000000511:252921-256897	6.67134	0.819624	TCONS_00062727	-	-	-	-	gi|460412370|ref|XP_004251574.1|/6.34698e-34/PREDICTED: early nodulin-93-like [Solanum lycopersicum]
XLOC_013637|PGSC0003DMT400071040,PGSC0003DMT400071041,PGSC0003DMT400071042,PGSC0003DMT400071043	PGSC0003DMB000000096:1603970-1605438	6.63174	0.804862	TCONS_00024515	K04125|1|8e-134|359|pop:POPTR_550316|gibberellin 2-oxidase [EC:1.14.11.13]	-	GO:0003824//catalytic activity;GO:0046914//transition metal ion binding	GO:0008152//metabolic process	gi|350536311|ref|NP_001234752.1|/1.79125e-166/gibberellin 2-oxidase [Solanum lycopersicum]
XLOC_035214|PGSC0003DMT400048814,PGSC0003DMT400048815,PGSC0003DMT400048816	PGSC0003DMB000000511:161949-163503	6.57399	0.821681	TCONS_00062685	-	-	-	-	gi|460412356|ref|XP_004251567.1|/1.22794e-30/PREDICTED: early nodulin-93-like [Solanum lycopersicum]
XLOC_007910|PGSC0003DMT400070613,PGSC0003DMT400070614,PGSC0003DMT400070615	PGSC0003DMB000000047:453061-456251	6.54541	0.80049	TCONS_00014180	K16055|1|0.0|1036|gmx:100810498|trehalose 6-phosphate synthase/phosphatase [EC:2.4.1.15 3.1.3.12]	-	GO:0019203//carbohydrate phosphatase activity;GO:0035251//UDP-glucosyltransferase activity	GO:0005991//trehalose metabolic process	gi|350534654|ref|NP_001233896.1|/0/trehalose-6-phosphate synthase [Solanum lycopersicum]
XLOC_024448|PGSC0003DMT400012663	PGSC0003DMB000000226:854861-855459	6.5446	0.813606	TCONS_00044023	-	-	-	-	gi|359491947|ref|XP_003634344.1|/1.04413e-15/PREDICTED: uncharacterized protein LOC100267722 [Vitis vinifera]
XLOC_004134|PGSC0003DMT400003917,PGSC0003DMT400003918,PGSC0003DMT400003919	PGSC0003DMB000000020:1828290-1830279	6.53975	0.81784	TCONS_00007401	-	-	-	-	gi|460373464|ref|XP_004232539.1|/0/PREDICTED: F-box protein At2g17036-like isoform 1 [Solanum lycopersicum]
XLOC_000669|PGSC0003DMT400026226	PGSC0003DMB000000004:529372-529838	6.49829	0.820961	TCONS_00000988	-	-	-	-	-
XLOC_037146|-	PGSC0003DMB000000611:81719-100167	6.47644	0.809354	TCONS_00065972	-	-	-	-	gi|460408362|ref|XP_004249614.1|/4.77092e-105/PREDICTED: uncharacterized protein LOC101259996 [Solanum lycopersicum]
XLOC_031264|PGSC0003DMT400005970,PGSC0003DMT400005971,PGSC0003DMT400005972	PGSC0003DMB000000372:88357-90395	6.47586	0.822898	TCONS_00055842	K05933|1|7e-121|296|gmx:100794816|aminocyclopropanecarboxylate oxidase [EC:1.14.17.4]	GO:0043231//intracellular membrane-bounded organelle;GO:0044444//cytoplasmic part;GO:0005576//extracellular region;GO:0016020//membrane	GO:0003729//mRNA binding;GO:0046914//transition metal ion binding;GO:0016641//oxidoreductase activity, acting on the CH-NH2 group of donors, oxygen as acceptor;GO:0016836//hydro-lyase activity	GO:0010039//response to iron ion;GO:0009692;GO:0006970//response to osmotic stress;GO:0072350//tricarboxylic acid metabolic process	gi|356513217|ref|XP_003525310.1|/9.13563e-120/PREDICTED: 1-aminocyclopropane-1-carboxylate oxidase 1-like [Glycine max]
XLOC_000668|PGSC0003DMT400026225	PGSC0003DMB000000004:527850-528566	6.45258	0.820224	TCONS_00000987	-	-	-	-	gi|462399691|gb|EMJ05359.1|/6.14009e-09/hypothetical protein PRUPE_ppa017543mg [Prunus persica]
XLOC_003568|PGSC0003DMT400090967	PGSC0003DMB000000017:2291196-2295187	6.42196	0.816229	TCONS_00006328	K13448|1|3e-45|178|vvi:100247858|calcium-binding protein CML	-	GO:0046872//metal ion binding	-	gi|460411634|ref|XP_004251211.1|/9.72789e-78/PREDICTED: calcium-binding protein CML38-like [Solanum lycopersicum]
XLOC_012086|PGSC0003DMT400076466	PGSC0003DMB000000083:352907-353346	6.37532	0.824184	TCONS_00021737	-	-	-	-	-
XLOC_017891|PGSC0003DMT400074657,PGSC0003DMT400074658	PGSC0003DMB000000134:555-1696	6.37255	0.819606	TCONS_00032283	K06892|1|7e-34|142|pop:POPTR_550478|;K05277|2|5e-32|136|aly:ARALYDRAFT_492580|leucoanthocyanidin dioxygenase [EC:1.14.11.19];K05278|5|1e-30|131|gmx:100816829|flavonol synthase [EC:1.14.11.23]	-	GO:0016705//oxidoreductase activity, acting on paired donors, with incorporation or reduction of molecular oxygen	GO:0012501//programmed cell death;GO:0009699//phenylpropanoid biosynthetic process	gi|460366174|ref|XP_004228966.1|/1.1906e-122/PREDICTED: feruloyl CoA ortho-hydroxylase 1-like [Solanum lycopersicum]
XLOC_000883|PGSC0003DMT400052182,PGSC0003DMT400052183,PGSC0003DMT400052184,PGSC0003DMT400052185	PGSC0003DMB000000004:4037036-4040947	6.34962	0.80956	TCONS_00001486	-	-	GO:0008081//phosphoric diester hydrolase activity	GO:0019400	gi|460371863|ref|XP_004231754.1|/0/PREDICTED: glycerophosphodiester phosphodiesterase GDE1-like [Solanum lycopersicum]
XLOC_005824|PGSC0003DMT400025661	PGSC0003DMB000000032:2217366-2240597	6.32152	0.82439	TCONS_00010400	-	-	-	-	gi|460385493|ref|XP_004238438.1|/2.18525e-143/PREDICTED: ser/Thr-rich protein T10 in DGCR region-like [Solanum lycopersicum]
XLOC_006795|PGSC0003DMT400033379	PGSC0003DMB000000039:293014-295169	6.31793	0.818269	TCONS_00012193	-	GO:0016020//membrane;GO:0044444//cytoplasmic part;GO:0043231//intracellular membrane-bounded organelle	-	-	gi|350537475|ref|NP_001234039.1|/2.34031e-132/expressed predominantly in leaves [Solanum lycopersicum]
XLOC_005213|PGSC0003DMT400014291	PGSC0003DMB000000026:2880848-2881385	6.28294	0.802428	TCONS_00009390	-	-	-	-	gi|255546525|ref|XP_002514322.1|/1.34222e-10/conserved hypothetical protein [Ricinus communis]
XLOC_037603|PGSC0003DMT400059095,PGSC0003DMT400059096	PGSC0003DMB000000646:185238-188281	6.22731	0.82343	TCONS_00066748	K01568|1|0.0|744|gmx:100809553|pyruvate decarboxylase [EC:4.1.1.1]	-	GO:0046872//metal ion binding;GO:0016831//carboxy-lyase activity;GO:0019842//vitamin binding	-	gi|460374306|ref|XP_004232952.1|/0/PREDICTED: pyruvate decarboxylase isozyme 1-like [Solanum lycopersicum]
XLOC_003569|PGSC0003DMT400096032	PGSC0003DMB000000017:2298064-2298616	6.22153	0.812611	TCONS_00006329	K13448|1|7e-45|177|rcu:RCOM_1677910|calcium-binding protein CML	-	GO:0046872//metal ion binding	-	gi|460411634|ref|XP_004251211.1|/1.12553e-79/PREDICTED: calcium-binding protein CML38-like [Solanum lycopersicum]
XLOC_011480|PGSC0003DMT400057318,PGSC0003DMT400057319,PGSC0003DMT400057320	PGSC0003DMB000000076:799281-803638	6.17671	0.802616	TCONS_00020760	K06617|1|0.0|1248|pop:POPTR_582552|raffinose synthase [EC:2.4.1.82]	GO:0009536//plastid	GO:0004672//protein kinase activity;GO:0008378//galactosyltransferase activity;GO:0032559	GO:0009725//response to hormone stimulus;GO:0009312//oligosaccharide biosynthetic process;GO:0005985//sucrose metabolic process;GO:0019406;GO:0023052//signaling;GO:0006950//response to stress;GO:0006464//cellular protein modification process	gi|350536529|ref|NP_001234763.1|/0/alkaline alpha-galactosidase seed imbibition protein [Solanum lycopersicum]
XLOC_039936|PGSC0003DMT400075153,PGSC0003DMT400075154,PGSC0003DMT400075155,PGSC0003DMT400075156	PGSC0003DMB000001059:8083-9221	6.16086	0.816315	TCONS_00070349	K13464|1|1e-33|115|vvi:100254231|jasmonate ZIM domain-containing protein	-	-	-	gi|460396263|ref|XP_004243696.1|/2.65747e-94/PREDICTED: protein TIFY 10A-like [Solanum lycopersicum]
XLOC_021782|PGSC0003DMT400033320	PGSC0003DMB000000181:224111-224607	6.04388	0.822675	TCONS_00039490	-	-	-	-	gi|359480702|ref|XP_003632516.1|/8.35342e-11/PREDICTED: uncharacterized protein LOC100854604 [Vitis vinifera]
XLOC_030892|PGSC0003DMT400062033	PGSC0003DMB000000361:171309-175669	6.0166	0.810468	TCONS_00055154	-	-	-	-	gi|460397777|ref|XP_004244443.1|/0/PREDICTED: protein notum homolog isoform 1 [Solanum lycopersicum]
XLOC_033737|PGSC0003DMT400090681	PGSC0003DMB000000446:429186-462064	5.9831	0.821989	TCONS_00060073	K01568|1|0.0|1020|rcu:RCOM_0489390|pyruvate decarboxylase [EC:4.1.1.1]	GO:0044464//cell part	GO:0046872//metal ion binding;GO:0016831//carboxy-lyase activity;GO:0019842//vitamin binding	-	gi|460407254|ref|XP_004249069.1|/0/PREDICTED: pyruvate decarboxylase isozyme 2-like [Solanum lycopersicum]
XLOC_026619|PGSC0003DMT400049875	PGSC0003DMB000000267:119367-120136	5.98001	0.823618	TCONS_00047650	-	-	-	-	gi|460405218|ref|XP_004248073.1|/7.68763e-21/PREDICTED: arabinogalactan peptide 20-like [Solanum lycopersicum]
XLOC_011487|PGSC0003DMT400057331,PGSC0003DMT400057332	PGSC0003DMB000000076:869732-882509	5.97779	0.821115	TCONS_00020777	K01623|1|2e-170|598|gmx:100792394|fructose-bisphosphate aldolase, class I [EC:4.1.2.13]	GO:0009536//plastid	GO:0005488//binding;GO:0016832//aldehyde-lyase activity	GO:0006007//glucose catabolic process	gi|460396924|ref|XP_004244020.1|/6.35524e-179/PREDICTED: fructose-bisphosphate aldolase, cytoplasmic isozyme 1-like [Solanum lycopersicum]
XLOC_011089|PGSC0003DMT400066508	PGSC0003DMB000000073:260763-261333	5.8814	0.813846	TCONS_00020024	-	-	GO:0016798//hydrolase activity, acting on glycosyl bonds	GO:0008152//metabolic process	gi|462396033|gb|EMJ01832.1|/5.80424e-18/hypothetical protein PRUPE_ppa013574mg [Prunus persica]
XLOC_021193|PGSC0003DMT400004537,PGSC0003DMT400004538,PGSC0003DMT400004539,PGSC0003DMT400004540,PGSC0003DMT400004541,PGSC0003DMT400004542	PGSC0003DMB000000173:122348-131409	5.86757	0.822795	TCONS_00038447	K00799|1|3e-83|308|vvi:100254124|glutathione S-transferase [EC:2.5.1.18]	-	GO:0016829//lyase activity	-	gi|460367326|ref|XP_004229525.1|/3.87506e-115/PREDICTED: glutathione transferase GST 23-like [Solanum lycopersicum]
XLOC_019423|PGSC0003DMT400051896	PGSC0003DMB000000150:847228-848206	5.85323	0.813503	TCONS_00035253	K14484|1|7e-46|182|aly:ARALYDRAFT_887587|auxin-responsive protein IAA	-	-	-	gi|365818519|gb|AEX00348.1|/8.11202e-72/IAA2 [Solanum lycopersicum]
XLOC_018144|PGSC0003DMT400076572,PGSC0003DMT400076573	PGSC0003DMB000000136:1352321-1354118	5.84795	0.803765	TCONS_00032824	K03627|1|4e-46|183|vvi:100249249|putative transcription factor	GO:0031981//nuclear lumen	GO:0003712//transcription cofactor activity;GO:0001071//nucleic acid binding transcription factor activity;GO:0003677//DNA binding	GO:0000160//two-component signal transduction system (phosphorelay);GO:0009725//response to hormone stimulus;GO:0006355//regulation of transcription, DNA-dependent;GO:0006950//response to stress	gi|350535769|ref|NP_001234468.1|/2.44558e-59/ethylene-responsive transcriptional coactivator [Solanum lycopersicum]
XLOC_015556|-	PGSC0003DMB000000112:1169707-1170080	5.77103	0.809937	TCONS_00028122	-	-	-	-	-
XLOC_011350|PGSC0003DMT400056986	PGSC0003DMB000000076:810417-811197	5.69309	0.815972	TCONS_00020462	K03686|1|2e-10|64.7|zma:100191825|molecular chaperone DnaJ;K09527|2|8e-10|62.4|cre:CHLREDRAFT_146571|DnaJ homolog subfamily C member 7;K09531|3|1e-09|61.6|vcn:VOLCADRAFT_95730|DnaJ homolog subfamily C member 11	-	GO:0005515//protein binding	-	gi|460396914|ref|XP_004244015.1|/1.24693e-77/PREDICTED: chaperone protein dnaJ 11, chloroplastic-like [Solanum lycopersicum]
XLOC_001653|PGSC0003DMT400028723,PGSC0003DMT400028724,PGSC0003DMT400028725	PGSC0003DMB000000008:1506560-1512581	5.62646	0.813417	TCONS_00002907	-	GO:0009526//plastid envelope;GO:0009534//chloroplast thylakoid	-	-	gi|460402484|ref|XP_004246742.1|/6.90322e-114/PREDICTED: uncharacterized protein LOC101245980 [Solanum lycopersicum]
XLOC_035945|PGSC0003DMT400017110,PGSC0003DMT400017111,PGSC0003DMT400017112,PGSC0003DMT400017113	PGSC0003DMB000000546:5778-10376	5.62602	0.816109	TCONS_00063994	K14455|1|6e-40|111|vvi:100243028|aspartate aminotransferase, mitochondrial [EC:2.6.1.1]	GO:0043231//intracellular membrane-bounded organelle	GO:0008483//transaminase activity;GO:0048037//cofactor binding	GO:0019752//carboxylic acid metabolic process	gi|460407202|ref|XP_004249043.1|/4.56911e-52/PREDICTED: aspartate aminotransferase, mitochondrial-like [Solanum lycopersicum]
XLOC_036845|PGSC0003DMT400043203,PGSC0003DMT400043204,PGSC0003DMT400043205,PGSC0003DMT400043206	PGSC0003DMB000000593:207511-210293	5.52609	0.814789	TCONS_00065479	K13424|1|3e-159|560|vvi:100243352|WRKY transcription factor 33	-	-	-	gi|283131244|dbj|BAI63294.1|/0/double WRKY type transfactor [Solanum tuberosum]
XLOC_009831|PGSC0003DMT400063247,PGSC0003DMT400063248,PGSC0003DMT400063249,PGSC0003DMT400063250	PGSC0003DMB000000062:920286-922815	5.50786	0.815732	TCONS_00017735	-	-	-	-	gi|460380723|ref|XP_004236104.1|/2.46322e-169/PREDICTED: probable inactive poly [ADP-ribose] polymerase SRO5-like [Solanum lycopersicum]
XLOC_032987|PGSC0003DMT400032938	PGSC0003DMB000000423:126543-127640	5.48675	0.813589	TCONS_00058744	-	-	-	-	gi|460373101|ref|XP_004232361.1|/3.1533e-125/PREDICTED: LOB domain-containing protein 41-like [Solanum lycopersicum]
XLOC_035405|PGSC0003DMT400016358,PGSC0003DMT400016359,PGSC0003DMT400016360	PGSC0003DMB000000519:233914-236640	5.47659	0.803576	TCONS_00063024	K13422|1|2e-10|65.9|rcu:RCOM_0864470|transcription factor MYC2	-	-	-	gi|460416079|ref|XP_004253378.1|/1.64275e-153/PREDICTED: transcription factor bHLH93-like [Solanum lycopersicum]
XLOC_024781|PGSC0003DMT400047344	PGSC0003DMB000000233:929872-930427	5.43892	0.821132	TCONS_00044550	-	-	-	-	-
XLOC_024535|PGSC0003DMT400079070,PGSC0003DMT400079071	PGSC0003DMB000000227:719931-722192	5.43509	0.824287	TCONS_00044194	K00001|1|0.0|552|rcu:RCOM_0236080|alcohol dehydrogenase [EC:1.1.1.1]	GO:0044424//intracellular part	GO:0046914//transition metal ion binding;GO:0016616//oxidoreductase activity, acting on the CH-OH group of donors, NAD or NADP as acceptor	GO:0008152//metabolic process	gi|113386|sp|P14675.1|ADH3_SOLTU/0/RecName: Full=Alcohol dehydrogenase 3
XLOC_004132|PGSC0003DMT400009432	PGSC0003DMB000000020:1786334-1789470	5.3718	0.808445	TCONS_00007397	-	GO:0043234//protein complex	GO:0004871//signal transducer activity;GO:0004549//tRNA-specific ribonuclease activity	GO:0032502//developmental process;GO:0009719;GO:0006950//response to stress;GO:0000394//RNA splicing, via endonucleolytic cleavage and ligation	gi|460373452|ref|XP_004232533.1|/1.18589e-90/PREDICTED: rhodanese-like domain-containing protein 15, chloroplastic-like isoform 1 [Solanum lycopersicum]
XLOC_005069|PGSC0003DMT400036851,PGSC0003DMT400036852	PGSC0003DMB000000026:652851-654284	5.30052	0.814429	TCONS_00009055	-	-	GO:0005515//protein binding	GO:0044267//cellular protein metabolic process;GO:0050896//response to stimulus	gi|350539992|ref|NP_001233835.1|/3.62251e-30/heat shock protein binding protein [Solanum lycopersicum]
XLOC_010972|PGSC0003DMT400066157	PGSC0003DMB000000073:262956-263581	5.28217	0.805034	TCONS_00019737	-	-	-	-	gi|356574315|ref|XP_003555294.1|/4.6445e-17/PREDICTED: LOW QUALITY PROTEIN: probable beta-D-xylosidase 5-like [Glycine max]
XLOC_020137|PGSC0003DMT400035267	PGSC0003DMB000000157:887438-888185	5.2521	0.813263	TCONS_00036631	K14488|1|2e-07|54.3|smo:SELMODRAFT_18097|SAUR family protein	GO:0043231//intracellular membrane-bounded organelle	GO:0005515//protein binding	GO:0009755//hormone-mediated signaling pathway	gi|460396233|ref|XP_004243682.1|/3.01697e-54/PREDICTED: uncharacterized protein LOC101268293 [Solanum lycopersicum]
XLOC_018838|PGSC0003DMT400056352	PGSC0003DMB000000145:6525-9164	5.2271	0.820858	TCONS_00034060	K13424|1|2e-23|107|vvi:100243352|WRKY transcription factor 33	-	GO:0003677//DNA binding;GO:0001071//nucleic acid binding transcription factor activity	GO:0010467//gene expression	gi|24745606|dbj|BAC23031.1|/2.28714e-81/WRKY-type DNA binding protein [Solanum tuberosum]
XLOC_009524|PGSC0003DMT400063688	PGSC0003DMB000000060:486359-490447	5.21614	0.808908	TCONS_00017112	K13447|1|0.0|1434|rcu:RCOM_1433130|respiratory burst oxidase [EC:1.6.3.- 1.11.1.-]	GO:0031224//intrinsic to membrane	GO:0046914//transition metal ion binding;GO:0016209//antioxidant activity;GO:0050662//coenzyme binding;GO:0050664//oxidoreductase activity, acting on NAD(P)H, oxygen as acceptor	GO:0008152//metabolic process	gi|75164734|sp|Q948T9.1|RBOHB_SOLTU/0/RecName: Full=Respiratory burst oxidase homolog protein B; AltName: Full=NADPH oxidase RBOHB; AltName: Full=StRBOHB
XLOC_014843|PGSC0003DMT400023193,PGSC0003DMT400023194,PGSC0003DMT400023195	PGSC0003DMB000000104:1654757-1656877	5.1886	0.81724	TCONS_00026827	K00924|1|8e-11|67.0|ath:AT5G22850|[EC:2.7.1.-]	-	-	-	gi|316927700|gb|ADU58603.1|/0/xyloglucan-specific endoglucanase inhibitor 1 [Solanum tuberosum]
XLOC_022438|PGSC0003DMT400047438,PGSC0003DMT400047440	PGSC0003DMB000000192:311093-313211	5.11686	0.801519	TCONS_00040575	-	-	GO:0003676//nucleic acid binding	-	gi|118490007|gb|ABK96797.1|/2.88006e-130/NAC domain protein NAC2 [Solanum tuberosum]
XLOC_033332|PGSC0003DMT400016305,PGSC0003DMT400016306	PGSC0003DMB000000434:301278-303395	5.06909	0.802428	TCONS_00059362	K09286|1|3e-20|99.0|ath:AT1G43160|EREBP-like factor	-	-	-	gi|460384233|ref|XP_004237817.1|/3.23558e-60/PREDICTED: ethylene-responsive transcription factor ABR1-like isoform 1 [Solanum lycopersicum]
XLOC_010282|PGSC0003DMT400017414,PGSC0003DMT400017416,PGSC0003DMT400017417	PGSC0003DMB000000068:808525-815847	5.06277	0.804605	TCONS_00018430	K09264|1|9e-35|147|smo:SELMODRAFT_449545|MADS-box transcription factor, plant	GO:0043231//intracellular membrane-bounded organelle	GO:0001071//nucleic acid binding transcription factor activity;GO:0003677//DNA binding	GO:0006351//transcription, DNA-dependent;GO:0003006//developmental process involved in reproduction	gi|460367628|ref|XP_004229674.1|/2.36872e-109/PREDICTED: agamous-like MADS-box protein AGL15-like [Solanum lycopersicum]
XLOC_010319|PGSC0003DMT400017543,PGSC0003DMT400017544	PGSC0003DMB000000068:1780399-1781615	5.05154	0.820772	TCONS_00018529	-	-	-	-	gi|460367534|ref|XP_004229628.1|/8.39918e-30/PREDICTED: uncharacterized protein LOC101246280 [Solanum lycopersicum]
XLOC_020133|PGSC0003DMT400035260,PGSC0003DMT400035261,PGSC0003DMT400035262,PGSC0003DMT400035263	PGSC0003DMB000000157:741910-748275	4.98408	0.821492	TCONS_00036626	K00695|1|0.0|1343|vvi:100249279|sucrose synthase [EC:2.4.1.13]	-	GO:0035251//UDP-glucosyltransferase activity	GO:0005984//disaccharide metabolic process	gi|28629438|gb|AAO34668.1|/0/sucrose synthase 2 [Solanum tuberosum]
XLOC_023804|PGSC0003DMT400042581	PGSC0003DMB000000215:452396-453609	4.9835	0.811771	TCONS_00042943	-	-	-	-	gi|460392236|ref|XP_004241723.1|/6.28597e-133/PREDICTED: uncharacterized protein LOC101245769 [Solanum lycopersicum]
XLOC_021243|PGSC0003DMT400044486	PGSC0003DMB000000174:24143-24546	4.964	0.821629	TCONS_00038551	-	-	-	-	-
XLOC_028637|PGSC0003DMT400049665,PGSC0003DMT400049666	PGSC0003DMB000000302:784402-786050	4.88008	0.801742	TCONS_00051173	-	-	-	-	gi|460397296|ref|XP_004244203.1|/8.55424e-176/PREDICTED: NAC domain-containing protein 72-like [Solanum lycopersicum]
XLOC_027569|PGSC0003DMT400039732	PGSC0003DMB000000283:646460-779434	4.84147	0.813126	TCONS_00049300	-	-	GO:0016491//oxidoreductase activity	GO:0008152//metabolic process	gi|24745927|dbj|BAC23045.1|/3.60191e-59/monooxygenase [Solanum tuberosum]
XLOC_027167|PGSC0003DMT400046948,PGSC0003DMT400046949	PGSC0003DMB000000277:375453-384373	4.83339	0.820584	TCONS_00048609	K01885|1|0.0|1179|gmx:100809656|glutamyl-tRNA synthetase [EC:6.1.1.17]	GO:0043231//intracellular membrane-bounded organelle	GO:0004812//aminoacyl-tRNA ligase activity;GO:0032559	GO:0006418//tRNA aminoacylation for protein translation	gi|460369047|ref|XP_004230376.1|/0/PREDICTED: probable glutamate--tRNA ligase, cytoplasmic-like [Solanum lycopersicum]
XLOC_023129|PGSC0003DMT400077388	PGSC0003DMB000000204:4228-4633	4.81267	0.817909	TCONS_00041713	-	-	-	-	gi|462401851|gb|EMJ07408.1|/1.33989e-10/hypothetical protein PRUPE_ppa015169mg [Prunus persica]
XLOC_040397|PGSC0003DMT400007895	PGSC0003DMB000002208:501-2152	4.80377	0.8104	TCONS_00070927	-	-	-	GO:0009743//response to carbohydrate stimulus	gi|460400227|ref|XP_004245637.1|/2.6123e-125/PREDICTED: heat stress transcription factor B-2b-like [Solanum lycopersicum]
XLOC_009463|PGSC0003DMT400007286,PGSC0003DMT400007287	PGSC0003DMB000000060:1218372-1220312	4.78942	0.82355	TCONS_00016985	-	-	-	GO:0050896//response to stimulus	gi|460368887|ref|XP_004230296.1|/3.79008e-83/PREDICTED: universal stress protein MJ0531-like isoform 1 [Solanum lycopersicum]
XLOC_024835|PGSC0003DMT400047341	PGSC0003DMB000000233:906988-907531	4.76905	0.813074	TCONS_00044641	-	-	-	-	gi|460395476|ref|XP_004243309.1|/1.10798e-36/PREDICTED: uncharacterized protein LOC101254505 [Solanum lycopersicum]
XLOC_007260|PGSC0003DMT400006708	PGSC0003DMB000000040:1756582-1761036	4.74958	0.800885	TCONS_00013201	-	-	-	-	gi|460379779|ref|XP_004235638.1|/2.79839e-112/PREDICTED: uncharacterized protein LOC101253763 [Solanum lycopersicum]
XLOC_023844|PGSC0003DMT400073394,PGSC0003DMT400073395,PGSC0003DMT400073396	PGSC0003DMB000000215:1059886-1062002	4.74228	0.802136	TCONS_00043025	K13424|1|1e-17|90.1|ath:AT2G38470|WRKY transcription factor 33	-	GO:0003677//DNA binding;GO:0001071//nucleic acid binding transcription factor activity	GO:0010467//gene expression	gi|350537615|ref|NP_001234301.1|/5.82533e-174/WRKY transcription factor 1 [Solanum lycopersicum]
XLOC_025229|PGSC0003DMT400017778	PGSC0003DMB000000241:373870-376606	4.74117	0.82355	TCONS_00045297	-	-	-	-	gi|460375088|ref|XP_004233340.1|/9.75799e-45/PREDICTED: uncharacterized protein LOC101261386 [Solanum lycopersicum]
XLOC_007105|PGSC0003DMT400006472	PGSC0003DMB000000040:1756582-1761036	4.72312	0.819178	TCONS_00012836	-	-	-	-	gi|460379781|ref|XP_004235639.1|/7.3464e-55/PREDICTED: uncharacterized protein LOC101254072 [Solanum lycopersicum]
XLOC_033689|PGSC0003DMT400010084	PGSC0003DMB000000445:169114-170316	4.72138	0.812251	TCONS_00060004	-	-	GO:0005488//binding	-	gi|460400338|ref|XP_004245692.1|/2.41141e-85/PREDICTED: zinc finger A20 and AN1 domain-containing stress-associated protein 7-like [Solanum lycopersicum]
XLOC_022676|PGSC0003DMT400065447,PGSC0003DMT400065449,PGSC0003DMT400065450,PGSC0003DMT400065451,PGSC0003DMT400065452	PGSC0003DMB000000198:24968-32555	4.71549	0.816915	TCONS_00040889	K00850|1|1e-65|251|gmx:100803139|6-phosphofructokinase [EC:2.7.1.11]	GO:0043234//protein complex;GO:0044444//cytoplasmic part	GO:0008443//phosphofructokinase activity;GO:0032559	GO:0006796//phosphate-containing compound metabolic process;GO:0006007//glucose catabolic process	gi|460399213|ref|XP_004245136.1|/1.04134e-74/PREDICTED: 6-phosphofructokinase 3-like [Solanum lycopersicum]
XLOC_001839|PGSC0003DMT400092392	PGSC0003DMB000000008:1055532-1056132	4.71339	0.820978	TCONS_00003300	-	GO:0016020//membrane;GO:0043231//intracellular membrane-bounded organelle	-	GO:0007165//signal transduction	gi|460408479|ref|XP_004249672.1|/1.87499e-97/PREDICTED: heme-binding-like protein At3g10130, chloroplastic-like [Solanum lycopersicum]
XLOC_005711|PGSC0003DMT400013193,PGSC0003DMT400013197,PGSC0003DMT400013198,PGSC0003DMT400013199	PGSC0003DMB000000032:209084-216350	4.71056	0.816863	TCONS_00010127	-	-	-	-	gi|460385122|ref|XP_004238254.1|/3.58686e-28/PREDICTED: uncharacterized protein LOC101258255 isoform 1 [Solanum lycopersicum]
XLOC_019746|PGSC0003DMT400041874	PGSC0003DMB000000152:1207098-1211489	4.70602	0.816915	TCONS_00035893	K03921|1|0.0|669|vvi:100853715|acyl-[acyl-carrier-protein] desaturase [EC:1.14.19.2]	GO:0009536//plastid	GO:0046872//metal ion binding;GO:0016717//oxidoreductase activity, acting on paired donors, with oxidation of a pair of donors resulting in the reduction of molecular oxygen to two molecules of water	GO:0006631//fatty acid metabolic process	gi|460409301|ref|XP_004250077.1|/0/PREDICTED: acyl-[acyl-carrier-protein] desaturase, chloroplastic-like [Solanum lycopersicum]
XLOC_028360|-	PGSC0003DMB000000298:420363-450527	4.64349	0.815286	TCONS_00050667	-	-	GO:0003677//DNA binding	GO:0006351//transcription, DNA-dependent	gi|460403947|ref|XP_004247447.1|/2.08816e-35/PREDICTED: homeobox protein LUMINIDEPENDENS-like [Solanum lycopersicum]
XLOC_004129|PGSC0003DMT400009425	PGSC0003DMB000000020:1694081-1698225	4.59383	0.808874	TCONS_00007387	K00472|1|3e-129|459|ath:AT5G66060|prolyl 4-hydroxylase [EC:1.14.11.2]	-	GO:0046914//transition metal ion binding;GO:0019842//vitamin binding;GO:0019798	GO:0019471	gi|460373434|ref|XP_004232524.1|/4.42316e-157/PREDICTED: prolyl 4-hydroxylase subunit alpha-1-like [Solanum lycopersicum]
XLOC_010387|PGSC0003DMT400017668	PGSC0003DMB000000068:1372495-1378961	4.58048	0.819469	TCONS_00018648	K00559|1|9e-158|555|vvi:100263590|sterol 24-C-methyltransferase [EC:2.1.1.41]	-	GO:0008169//C-methyltransferase activity	GO:0006730//one-carbon metabolic process;GO:0008202//steroid metabolic process	gi|460367578|ref|XP_004229650.1|/0/PREDICTED: cycloartenol-C-24-methyltransferase 1-like [Solanum lycopersicum]
XLOC_030396|PGSC0003DMT400015091	PGSC0003DMB000000345:195062-196192	4.55473	0.811548	TCONS_00054282	K12581|1|8e-84|308|vvi:100255985|CCR4-NOT transcription complex subunit 7/8	GO:0043231//intracellular membrane-bounded organelle	GO:0000175//3'-5'-exoribonuclease activity;GO:0005488//binding	GO:0006950//response to stress;GO:0016070//RNA metabolic process	gi|460391467|ref|XP_004241342.1|/5.19265e-143/PREDICTED: probable CCR4-associated factor 1 homolog 9-like [Solanum lycopersicum]
XLOC_019379|PGSC0003DMT400029402	PGSC0003DMB000000149:1306628-1313302	4.49183	0.808205	TCONS_00035151	K12130|1|1e-92|339|rcu:RCOM_0969830|pseudo-response regulator 5	-	-	-	gi|460405918|ref|XP_004248421.1|/0/PREDICTED: uncharacterized protein LOC101262866 isoform 2 [Solanum lycopersicum]
XLOC_004332|-	PGSC0003DMB000000021:2981243-2982470	4.48432	0.808634	TCONS_00007776	-	-	-	-	gi|460402156|ref|XP_004246580.1|/8.35003e-57/PREDICTED: uncharacterized protein LOC101248512 [Solanum lycopersicum]
XLOC_017159|PGSC0003DMT400078163	PGSC0003DMB000000128:294715-297705	4.47497	0.815337	TCONS_00030966	K03283|1|0.0|1172|vvi:100253562|heat shock 70kDa protein 1/8	-	GO:0016628//oxidoreductase activity, acting on the CH-CH group of donors, NAD or NADP as acceptor;GO:0032559	GO:0008152//metabolic process;GO:0050896//response to stimulus	gi|371779317|emb|CCA29120.1|/0/heat shock protein 70 isoform 1 [Solanum lycopersicum]
XLOC_004277|PGSC0003DMT400022904	PGSC0003DMB000000021:1551380-1552537	4.43817	0.80109	TCONS_00007669	-	-	-	-	gi|460402022|ref|XP_004246514.1|/3.46728e-134/PREDICTED: uncharacterized protein LOC101254416 [Solanum lycopersicum]
[truncated: 131 more rows]

## Sheet: week-dry-vs-week-wet.groupDiffG
gene_id	locus	log2Ratio(week-wet/week-dry)	probability	transcript_id	KEGG Orthology	GO Component	GO Function	GO Process	Blast nr
[truncated: 89 more rows]

## Sheet: categorized genes
RNA-Seq		Description/blastx	gene_ID
[truncated: 172 more rows]
