# Supplementary material for: Effect of wet storage conditions on potato tuber transcriptome, phytohormones and growth
Source: BMC Plant Biol. 2019 Jun 17;19:262. doi: 10.1186/s12870-019-1875-y (PMC6580497; doi:10.1186/s12870-019-1875-y)
Supplement: Supplementary file 3 — Similarity between the microarray analysis at 4 °C and RNA-Seq analysis at 15 °C. (XLSX 24 kb) [file 12870_2019_1875_MOESM3_ESM.xlsx]

## Sheet: Sheet2
Microarray		RNA-Seq
Sugars and amino acids		Sugars and amino acids
AAO34668: sucrose synthase 2	MICRO.196.C2_1792	sucrose synthase 2	XLOC_020133|PGSC0003DMT400035260,PGSC0003DMT400035261,PGSC0003DMT400035262,PGSC0003DMT400035263
AAO34668: sucrose synthase 2	STMHE19TV_557	sucrose synthase	XLOC_039499|PGSC0003DMT400017087,PGSC0003DMT400017088,PGSC0003DMT400017092,PGSC0003DMT400017093,PGSC0003DMT400017094
AAO67719: sucrose synthase	MICRO.1765.C1_1320	sugar phosphate translocator	XLOC_016001|-
CAJ32597: sucrose synthase	bf_suspxxxx_0008E08.t3m.scf_656	sucrose transport protein	XLOC_017827|PGSC0003DMT400023804
ABE79318: Plant lipid transfer/seed storage/trypsin-alpha amylase inhibitor	bf_mxflxxxx_0021h04.t3m.scf_360	bidirectional sugar transporter SWEET12	XLOC_040390|PGSC0003DMT400082699
AAD01264: glucose acyltransferase	bf_mxflxxxx_0006f03.t3m.scf_319	fructose-bisphosphate aldolase	XLOC_011487|PGSC0003DMT400057331,PGSC0003DMT400057332
AAD01264: glucose acyltransferase	MICRO.5259.C1_483	triose phosphate isomerase	XLOC_036565|PGSC0003DMT400071330
AAN15317: isoamylase isoform 1	MICRO.15626.C1_1362	pyruvate kinase	XLOC_001914|PGSC0003DMT400072411
NP_566976: pyruvate kinase	MICRO.122.C3_1932	6-phosphofructokinase	XLOC_006004|PGSC0003DMT400025917,PGSC0003DMT400025918,PGSC0003DMT400025919
CAC87643: alcohol oxidase	MICRO.10130.C2_550	glyceraldehyde 3-phosphate dehydrogenase	XLOC_005354|PGSC0003DMT400044944
CAB86903: pyruvate kinase-like protein	MICRO.122.C2_991	pyruvate decarboxylase isozyme 1	XLOC_037603|PGSC0003DMT400059095,PGSC0003DMT400059096
AAM92008: glyceraldehyde 3-phosphate dehydrogenase	MICRO.126.C7_1355	pyruvate decarboxylase isozyme 2	XLOC_033737|PGSC0003DMT400090681
ABC01905: fructose-bisphosphate aldolase-like protein	MICRO.1959.C4_325	L-lactate dehydrogenase	XLOC_022842|PGSC0003DMT400012233
P14675: Alcohol dehydrogenase 3	MICRO.135.C16_767	Alcohol dehydrogenase 3	XLOC_024535|PGSC0003DMT400079070,PGSC0003DMT400079071
BAC23043: pyruvate decarboxylase	MICRO.389.C2_584	alanine aminotransferase 2	XLOC_007034|PGSC0003DMT400023716
CAA70100: L-lactate dehydrogenase	MICRO.13867.C1_1081	alanine aminotransferase 2	XLOC_007035|-
AAR05449: alanine aminotransferase	MICRO.8645.C2_606	aspartate aminotransferase	XLOC_018691|PGSC0003DMT400040385
NP_180654: ASP1 (ASPARTATE AMINOTRANSFERASE 1)	MICRO.7025.C2_1421	aspartate aminotransferase	XLOC_035945|PGSC0003DMT400017110,PGSC0003DMT400017111,PGSC0003DMT400017112,PGSC0003DMT400017113
AAR05449: alanine aminotransferase	MICRO.7025.C2_1421	glutamate decarboxylase 4	XLOC_040352|PGSC0003DMT400006326
AAL26865: NADH glutamate synthase precursor	MICRO.8215.C1_921	glutamate synthase 1	XLOC_016788|PGSC0003DMT400023532
AAO92255: gamma-aminobutyrate transaminase subunit precursor isozyme 1	MICRO.14587.C1_917	glutamate--tRNA ligase	XLOC_027167|PGSC0003DMT400046948,PGSC0003DMT400046949
P21342: Pyrophosphate--fructose 6-phosphate 1-phosphotransferase alpha subunit (PFP) (6-phosphofructokinase, pyrophosphate dependent) (Pyrophosphate-dependent 6-phosphofructose-1-kinase) (PPi-PFK)	MICRO.893.C1_1200	GABA transporter 2	XLOC_008196|PGSC0003DMT400032044,PGSC0003DMT400032045,PGSC0003DMT400032046
AAO61489: phosphoenolpyruvate carboxylase kinase 1	BPLI12E23TH_372	gamma aminobutyrate transaminase 1	XLOC_025883|PGSC0003DMT400030682,PGSC0003DMT400030683
AAX33231: plastid alpha-amylase	MICRO.4576.C1_839
AAD25541: fructose-1,6-bisphosphatase precursor	MICRO.4365.C1_763
AAM92008: glyceraldehyde 3-phosphate dehydrogenase	MICRO.126.C5_1264
Q9M4G5: Phosphoglucomutase, chloroplast precursor (Glucose phosphomutase) (PGM)	bf_swstxxxx_0059a07.t3m.scf_523
Q40546: Pyruvate kinase isozyme G, chloroplast precursor	MICRO.14699.C1_621
ROS and HSP		ROS and HSP
AAM23263: DnaJ-like protein	MICRO.5003.C1_681	NADH dehydrogenase subunit 5 (mitochondrion)	XLOC_023035|-
ABC69274: putative DnaJ protein	MICRO.8544.C2_575	chaperone protein dnaJ 11, chloroplastic-like	XLOC_011349|PGSC0003DMT400056985
ABC69274: putative DnaJ protein	STMIF70TV_90	chaperone protein dnaJ 11, chloroplastic-like	XLOC_011350|PGSC0003DMT400056986
AAB36543: DnaJ-like protein	MICRO.9642.C1_706	chaperone protein dnaJ 11, chloroplastic-like	XLOC_011349|PGSC0003DMT400056985
P51819: Heat shock protein 83	MICRO.5626.C1_1767	cytochrome P450 98A2-like	XLOC_013017|PGSC0003DMT400008504
CAA44820: heat shock protein 70	MICRO.6997.C1_398	peroxidase 12-like	XLOC_027773|PGSC0003DMT400064551,PGSC0003DMT400064554
P09189: Heat shock cognate 70 kDa protein	MICRO.14654.C1_1004	peroxidase 73-like	XLOC_002752|PGSC0003DMT400064269,PGSC0003DMT400064270
P09189: Heat shock cognate 70 kDa protein	SSBT002J04x.scf_21	probable glutathione-S-transferase	XLOC_039420|PGSC0003DMT400005547
P51819: Heat shock protein 83	MICRO.6915.C1_1619	glutathione transferase GST 23-like	XLOC_021193|PGSC0003DMT400004537,PGSC0003DMT400004538,PGSC0003DMT400004539,PGSC0003DMT400004540,PGSC0003DMT400004541,PGSC0003DMT400004542
P24629: Heat shock cognate 70 kDa protein 1	MICRO.738.C3_1988	probable glutathione S-transferase-like	XLOC_001844|PGSC0003DMT400028618,PGSC0003DMT400028619
ABE93759: Heat shock protein DnaJ	MICRO.10892.C2_271	probable glutathione S-transferase-like	XLOC_001844|PGSC0003DMT400028618,PGSC0003DMT400028619
CAA44820: heat shock protein 70	MICRO.9911.C1_873	stress-associated protein 11	XLOC_001063|PGSC0003DMT400001376,PGSC0003DMT400001377
AAF74563: heat stress transcription factor A3	MICRO.11752.C3_919	Full=Respiratory burst oxidase homolog protein B; AltName: Full=NADPH oxidase RBOHB; AltName: Full=StRBOHB	XLOC_009524|PGSC0003DMT400063688
BAB70751: respiratory burst oxidase homolog	MICRO.17075.C1_576	heat stress transcription factor B-2b-like	XLOC_040397|PGSC0003DMT400007895
AAG16758: putative glutathione S-transferase T3	MICRO.4777.C3_736	universal stress protein MJ0531-like isoform 1	XLOC_009463|PGSC0003DMT400007286,PGSC0003DMT400007287
ABE81799: Glutamyl-tRNA synthetase, class Ic; Glutamyl-tRNA synthetase archae/euk cytosolic; Glutathione S-transferase, C-terminal-like	MICRO.1748.C2_1635	universal stress protein MJ0531-like isoform 1	XLOC_012379|PGSC0003DMT400060724
ABE81799: Glutamyl-tRNA synthetase, class Ic; Glutamyl-tRNA synthetase archae/euk cytosolic; Glutathione S-transferase, C-terminal-like	MICRO.10426.C1_705	stress-associated protein 1	XLOC_010331|PGSC0003DMT400017570
BAC21263: glutathione S-transferase	MICRO.4777.C2_593	18.1 kDa class I heat shock protein-like	XLOC_000840|PGSC0003DMT400032851
AAX20044: probable glutathione-S-transferase	MICRO.13962.C1_74	18.2 kDa class I heat shock protein-like	XLOC_037559|PGSC0003DMT400044066
Q03666: Probable glutathione S-transferase (Auxin-induced protein PCNT107)	MICRO.9389.C1_676	26.5 kDa heat shock protein, mitochondrial-like isoform 2	XLOC_011643|PGSC0003DMT400073689
AAK52084: peroxidase	MICRO.2495.C1_1183	18.2 kDa class I heat shock protein-like	XLOC_029890|PGSC0003DMT400030381
NP_849599: hydroxyacylglutathione hydrolase	MICRO.9683.C1_1127	heat shock protein 83-like	XLOC_032219|PGSC0003DMT400024594
O24031: Probable phospholipid hydroperoxide glutathione peroxidase (PHGPx)	MICRO.1448.C1_733	heat shock protein 70 isoform 1	XLOC_017159|PGSC0003DMT400078163
AAG16756: putative glutathione S-transferase T1	MICRO.13339.C2_1605	heat shock protein binding protein	XLOC_005069|PGSC0003DMT400036851,PGSC0003DMT400036852
AAD41405: cytosolic ascorbate peroxidase	MICRO.7305.C1_167
Q03662: Probable glutathione S-transferase (Auxin-induced protein PGNT1/PCNT110)	MICRO.13962.C2_243
AAG34813: glutathione S-transferase GST 23	MICRO.6053.C4_217
ABE81574: Haem peroxidase, plant/fungal/bacterial	MICRO.15915.C1_713
AAX20044: probable glutathione-S-transferase	MICRO.592.C3_1008
NP_191867: ATGPX5 (GLUTATHIONE PEROXIDASE 5); glutathione peroxidase	bf_mxlfxxxx_0008b09.t3m.scf_188
CAC42086: putative peroxidase	MICRO.16894.C1_421
ABE87267: Prephenate dehydrogenase; NADP oxidoreductase, coenzyme F420-dependent	MICRO.5882.C1_997
AAL35365: ascorbate peroxidase	MICRO.3921.C1_1
NP_191867: ATGPX5 (GLUTATHIONE PEROXIDASE 5); glutathione peroxidase	MICRO.7571.C3_985
AAY89389: thylakoid-bound ascorbate peroxidase 6	MICRO.2098.C2_825
Q43497: Monodehydroascorbate reductase (MDAR) (Ascorbate free radical reductase) (AFR reductase)	MICRO.2502.C3_1469
AAF64449: glutathione S-transferase	MICRO.6622.C2_414
CAC84143: thioredoxin peroxidase	MICRO.817.C3_1075
Q69GY7: Cytochrome b6-f complex iron-sulfur subunit, chloroplast precursor (Rieske iron-sulfur protein) (Plastohydroquinone:plastocyanin oxidoreductase iron-sulfur protein) (ISP) (RISP)	PPCBS38TH_150
CAC84143: thioredoxin peroxidase	MICRO.817.C2_799
AAL32632: oxidoreductase of zinc-binding dehydrogenase family	MICRO.3945.C2_694
AAO61856: glutathione S-transferase Z1	MICRO.4562.C1_837
P80461: Glutathione reductase, chloroplast precursor (GR) (GRase)	MICRO.12200.C1_1541
Cell wall		Cell wall
CAA67728: pectinacetylesterase precursor [Vigna radiata var. radiata]	MICRO.4427.C2_1317	pectin methylesterase inhibitor isoform	XLOC_031391|-
Q43111: Pectinesterase-3 precursor (Pectin methylesterase 3) (PE 3)	MICRO.9527.C1_718	feruloyl CoA ortho-hydroxylase 1-like	XLOC_022488|PGSC0003DMT400046356
ABO81417: Expansin 45, endoglucanase-like [Medicago truncatula]	bf_mxflxxxx_0026g01.t3m.scf_339	leucoanthocyanidin dioxygenase-like	XLOC_015041|PGSC0003DMT400049193
BAC20928: pectin-glucuronyltransferase [Nicotiana plumbaginifolia]	bf_mxflxxxx_0060a09.t3m.scf_51	cyanidin-3-O-glucoside 2-O-glucuronosyltransferase-like	XLOC_039184|PGSC0003DMT400080759
NP_195365: S-adenosylmethionine-dependent methyltransferase [Arabidopsis thaliana]	MICRO.3438.C1_1059	feruloyl CoA ortho-hydroxylase 1-like	XLOC_021556|-
AAB32507: S-adenosylmethionine decarboxylase; SAMDC	MICRO.607.C3_1772	endoglucanase 12-like isoform 1	XLOC_019665|PGSC0003DMT400041703,PGSC0003DMT400041704,PGSC0003DMT400041705
AAS46240: xyloglucan endotransglucosylase-hydrolase XTH5 [Lycopersicon esculentum]	MICRO.5717.C1_980	feruloyl CoA ortho-hydroxylase 1-like	XLOC_017891|PGSC0003DMT400074657,PGSC0003DMT400074658
Q40144: Probable xyloglucan endotransglucosylase/hydrolase 1 precursor (LeXTH1)	MICRO.3035.C2_1128	hydrolase protein 23-like	XLOC_029737|PGSC0003DMT400036329
AAS46242: xyloglucan endotransglucosylase-hydrolase XTH6 [Lycopersicon esculentum]	MICRO.3403.C4_21	4-coumarate--CoA ligase-like 9-like	XLOC_023718|-
O24146: 4-coumarate--CoA ligase 2 (4CL 2) (4-coumaroyl-CoA synthase 2)	MICRO.10347.C1_490	expansin-like B1-like	XLOC_028055|PGSC0003DMT400067459
AAP03021: 4-coumarate-CoA ligase-like protein [Arabidopsis thaliana]	MICRO.1094.C3_723	xyloglucan-specific endoglucanase inhibitor 1	XLOC_014843|PGSC0003DMT400023193,PGSC0003DMT400023194,PGSC0003DMT400023195
AAM12787: putative anthocyanidine rhamnosyl-transferase [Capsicum annuum]	bf_mxlfxxxx_0048a10.t3m.scf_238	S-adenosylmethionine decarboxylase proenzyme-like	XLOC_000690|PGSC0003DMT400026052,PGSC0003DMT400026053
		hydrolase protein 26-like	XLOC_019916|-
		hydrolase protein 23-like	XLOC_029737|PGSC0003DMT400036329
PI and patatin		PI and patatin
AAZ94178: metallocarboxypeptidase inhibitor precursor	MICRO.2033.C13_435	metallocarboxypeptidase inhibitor-like	XLOC_028497|-
AAC95130: metallocarboxypeptidase inhibitor IIa precursor	bf_slmwxxxx_0005e11.t3m.scf_213	metallocarboxypeptidase inhibitor-like	XLOC_028497|-
P08454: Wound-induced proteinase inhibitor 1 precursor (Wound-induced proteinase inhibitor I) (Chymotrypsin inhibitor I, D subunit)	bf_cswcxxxx_0007b05.t3m.scf_147	Full=Proteinase inhibitor PSI-1.2	XLOC_024201|PGSC0003DMT400080469
AAZ94182: proteinase inhibitor I precursor	MICRO.5302.C1_568	putative Kunitz-type proteinase inhibitor	XLOC_032222|PGSC0003DMT400024599
Q41488: Proteinase inhibitor type-2 P303.51 precursor (Proteinase inhibitor type II P303.51)	bf_cswcxxxx_0006h05.t3m.scf_6	Full=Cysteine protease inhibitor 1; AltName: Full=P340; AltName: Full=P34021; AltName: Full=PCPI 8.3; Flags: Precursor	XLOC_020352|PGSC0003DMT400026285
AAA69780: proteinase inhibitor I	TBSK02083FF07.t3m.scf_368	Full=Serine protease inhibitor 7; AltName: Full=PIGEN1; Short=PIG; AltName: Full=STPIA; AltName: Full=STPIB; AltName: Full=pF4; AltName: Full=pKEN14-28; AltName: Allergen=Sola t 4; Flags: Precursor	XLOC_020335|PGSC0003DMT400026257
AAM21642: putative Kunitz-type proteinase inhibitor	033B11AF.esd_385	Kunitz-type protease inhibitor D, partial	XLOC_020354|PGSC0003DMT400026288,PGSC0003DMT400026289
AAM21643: putative Kunitz-type proteinase inhibitor	MICRO.1751.C22_554	Kunitz-type enzyme inhibitor S9C11	XLOC_020355|PGSC0003DMT400026290
AAZ94187: Kunitz-type protease inhibitor precursor	MICRO.9404.C1_643	Full=Patatin-05; AltName: Full=Patatin-1-Kuras 1; Flags: Precursor	XLOC_032286|PGSC0003DMT400022567,PGSC0003DMT400036586
q41433: Probable serine protease inhibitor 6 precursor (AM66)	bf_arrayxxx_0021d02.t3m.scf_564	patatin storage protein	XLOC_039025|PGSC0003DMT400044046,PGSC0003DMT400044052,PGSC0003DMT400044055,PGSC0003DMT400075172
q41484: Serine protease inhibitor 5 precursor (gCDI-B1)	MICRO.1751.C20_234
q41448: Aspartic protease inhibitor 7 precursor (Cathepsin D inhibitor p749)	ACDA03942A06.T3m.scf_276
q41480: Aspartic protease inhibitor 1 precursor (pA1) (gCDI-A1) (STPIA) (STPID)	bf_cswbxxxx_0028d02.t3m.scf_151
AAM21657: patatin storage protein	TBSK04766FF02.t3m.scf_132
ABC55684: patatin protein group J-1	bf_arrayxxx_0053d01.t7m.scf_254
ABC55681: patatin protein group D-1	MICRO.1520.C14_346
ABC55680: patatin protein group A-3	BF_CSCHXXXX_0012H03.T3M.SCF_384
P07745: Patatin precursor (Potato tuber protein)	MICRO.1520.C3_1249
O24384: Cysteine protease inhibitor 8 precursor (PCPI-8) (Pcpi8)	TBSK03412FE04.t3m.scf_511
O24383: Cysteine protease inhibitor 10 precursor (PCPI-10) (Pcpi10)	BF_CSCHXXXX_0042C07.T3M.SCF_311
P20347: Cysteine protease inhibitor 1 precursor (PCPI 8.3) (P340) (P34021)	TBSK01365FB09.t3m.scf_133
Phytohormones		Phytohormones
AAA86052: abscisic stress ripening protein	MICRO.6277.C1_146	ABA 8'-hydroxylase CYP707A1	XLOC_030266|PGSC0003DMT400047537,PGSC0003DMT400047538
AAT75152: 9-cis-epoxycarotenoid dioxygenase 2	MICRO.11321.C1_756	abscisic acid receptor PYL4-like	XLOC_024087|PGSC0003DMT400053119
AAG22605: aldehyde oxidase	STMDF92TV_84	probable protein phosphatase 2C 63-like	XLOC_020728|PGSC0003DMT400013941,PGSC0003DMT400013942,PGSC0003DMT400013943
NP_195118: catalytic/ protein phosphatase type 2C	MICRO.12002.C1_737	auxin-regulated dual specificity cytosolic kinase	XLOC_025652|PGSC0003DMT400012412,PGSC0003DMT400012413,PGSC0003DMT400012414
NP_180079: catalytic/ protein phosphatase type 2C/ protein serine/threonine phosphatase	MICRO.9587.C1_718	auxin-induced protein 15A-like	XLOC_027983|-
ABD28350: Protein phosphatase 2C-like	MICRO.10982.C2_1255	IAA2	XLOC_019423|PGSC0003DMT400051896
AAM29183: ACC oxidase	cSTA34H12TH_201	jasmonic acid 2	XLOC_027583|PGSC0003DMT400039668,PGSC0003DMT400039669,PGSC0003DMT400039670
AAM29183: ACC oxidase	MICRO.2830.C1_1022	transcription factor DIVARICATA-like	XLOC_038752|PGSC0003DMT400019668
P07920: 1-aminocyclopropane-1carboxylate oxidase 2 (ACC oxidase 2) (Ethylene-forming enzyme) (EFE) (Protein GTOMA)	BPLI16E1TH_626	phospholipase A1-II 1-like isoform 1	XLOC_038776|PGSC0003DMT400027854,PGSC0003DMT400027855
ABK96798: ethylene response factor 3	MICRO.14241.C1_566	protein TIFY 10A-like	XLOC_039936|PGSC0003DMT400075153,PGSC0003DMT400075154,PGSC0003DMT400075155,PGSC0003DMT400075156
NP_195365: S-adenosylmethionine-dependent methyltransferase	MICRO.3438.C1_1059	lipoxygenase	XLOC_040540|-PGSC0003DMT400058934
CAF31508: S-adenosyl-L-methionine:benzoic acid/salicylic acid carboxyl methyltransferase	MICRO.17916.C1_1098	gibberellin 2-oxidase	XLOC_013637|PGSC0003DMT400071040,PGSC0003DMT400071041,PGSC0003DMT400071042,PGSC0003DMT400071043
P43281: S-adenosylmethionine synthetase 2 (Methionine adenosyltransferase 2) (AdoMet synthetase 2)	POABI58TV_468	gibberellin 2-beta-dioxygenase 8-like	XLOC_017108|PGSC0003DMT400078051,PGSC0003DMT400078052
AAT76903: IAA type protein	BF_CSCHXXXX_0017E01.T3M.SCF_598	gibberellin 2-oxidase	XLOC_013637|PGSC0003DMT400071040,PGSC0003DMT400071041,PGSC0003DMT400071042,PGSC0003DMT400071043
AAZ81522: auxin response factor 2	MICRO.12878.C1_1607	1-aminocyclopropane-1-carboxylate oxidase 1-like	XLOC_031264|PGSC0003DMT400005970,PGSC0003DMT400005971,PGSC0003DMT400005972
ABC69715: auxin response factor 4	STMGP45TV_727	ethylene-responsive transcription factor ABR1-like isoform 1	XLOC_033332|PGSC0003DMT400016305,PGSC0003DMT400016306
ABG37639: putative auxin-resistance protein	MICRO.5709.C1_743	two-component response regulator ARR6-like	XLOC_009804|PGSC0003DMT400063187,PGSC0003DMT400063188
AAM12781: auxin-induced SAUR-like protein	MICRO.12194.C1_537	NAC domain-containing protein 72-like	XLOC_028637|PGSC0003DMT400049665,PGSC0003DMT400049666
AAT76903: IAA type protein	MICRO.7077.C1_392
AAB67865: lipoxygenase	MICRO.11738.C1_893
AAD04258: 5-lipoxygenase	MICRO.6663.C8_730
P37831: Lipoxygenase 1	STDB004O12u.scf_304
CAA64766: lipoxygenase	MICRO.6663.C6_256
P38415: Lipoxygenase A	089G03AF.esd_594
CAA65268: 13-lipoxygenase	MICRO.4514.C1_2627
ABJ98930: NIMIN2c protein	MICRO.13345.C1_464
AAT57639: NIM1-like protein 2	STMGT07TV_67
ABK96797: NAC domain protein NAC2	MICRO.12856.C1_914
ABK96797: NAC domain protein NAC2	bf_mxlfxxxx_0059g04.t3m.scf_551
CAC42087: putative NAC domain protein	MICRO.1484.C1_1186
ABE90192: Gibberellin regulated protein	MICRO.9738.C2_788
AAB64346: gibberellin 7-oxidase	MICRO.2856.C2_675
P56725: Zeatin O-xylosyltransferase (Zeatin O-beta-D-xylosyltransferase)	MICRO.3788.C2_1418
P56725: Zeatin O-xylosyltransferase (Zeatin O-beta-D-xylosyltransferase)	MICRO.3788.C4_980
Q9ZSK5: Zeatin O-glucosyltransferase (Trans-zeatin O-beta-D-glucosyltransferase)	MICRO.3788.C5_92
NP_974105: ATTPS6; trehalose-phosphatase	MICRO.11498.C1_1109
AAU03490: trehalose-phosphate phosphatase	MICRO.2197.C1_941
Senescence		Senescence
CAA42537: wound induced protein	SDBT002F03x.scf_152	late embryogenesis abundant protein Lea5-like	XLOC_023315|PGSC0003DMT400046207
P20144: WOUND-INDUCED PROTEIN 1	bf_mxflxxxx_0070a04.t3m.scf_644	ubiquitin carboxyl-terminal hydrolase 6-like	XLOC_001341|-
P20144: WOUND-INDUCED PROTEIN 1	MICRO.8406.C1_520	ubiquitin-conjugating enzyme E2 28-like	XLOC_011474|PGSC0003DMT400057302
AAV65495: trehalose 6-phosphate synthase	MICRO.6075.C1_1156	ADP-ribosylation factor 2-B-like	XLOC_022211|PGSC0003DMT400064245,PGSC0003DMT400075806,PGSC0003DMT400075807,PGSC0003DMT400075808,PGSC0003DMT400075809
AAR25800: cathepsin B-like cysteine proteinase	MICRO.8090.C1_835	ubiquitin-conjugating enzyme E2 5A-like isoform 1	XLOC_003972|PGSC0003DMT400009228,PGSC0003DMT400009229
NP_173145: SRG1 (SENESCENCE-RELATED GENE 1); oxidoreductase, acting on paired donors, with incorporation or reduction of molecular oxygen, 2-oxoglutarate as one donor, and incorporation of one atom each of oxygen into both donors	bf_ivrootxx_0043g06.t3m.scf_472	E3 ubiquitin-protein ligase synoviolin-like	XLOC_026659|PGSC0003DMT400049954
AAF75749: dehydration-induced protein ERD15	MICRO.2686.C3_275	trehalose-6-phosphate synthase	XLOC_007910|PGSC0003DMT400070613,PGSC0003DMT400070614,PGSC0003DMT400070615
ABO81754: senescence-associated putative protein, putative	MICRO.2013.C5_783	E3 ubiquitin-protein ligase COP1-like	XLOC_019086|PGSC0003DMT400034700,PGSC0003DMT400034701,PGSC0003DMT400034702,PGSC0003DMT400034703,PGSC0003DMT400034704,PGSC0003DMT400034705,PGSC0003DMT400034706,PGSC0003DMT400034708
AAV65495: trehalose 6-phosphate synthase	MICRO.6075.C2_1482	E3 ubiquitin-protein ligase RMA1H1-like	XLOC_036960|PGSC0003DMT400055829,PGSC0003DMT400055830
ABE86297: Ubiquitin; Apoptosis regulator Bcl-2 protein, BAG	MICRO.387.C3_829	dehydration-induced protein ERD15	XLOC_017285|PGSC0003DMT400076749,PGSC0003DMT400076750,PGSC0003DMT400076751
AAU03490: trehalose-phosphate phosphatase	MICRO.2197.C1_941	ubiquitin-conjugating enzyme E2 2-like isoform 1	XLOC_008896|PGSC0003DMT400046571
ABE80517: Autophagy-related protein 2, related	MICRO.11007.C1_728	late embryogenesis abundant protein Lea5-like	XLOC_023315|PGSC0003DMT400046207
q41448: Aspartic protease inhibitor 7 precursor (Cathepsin D inhibitor p749)	MICRO.1751.C37_493
NP_565376: protein binding / ubiquitin-protein ligase/ zinc ion binding	MICRO.17677.C1_438
Signalling		Signalling
AAR92477: putative WRKY transcription factor 30	MICRO.16727.C1_676	probable WRKY transcription factor 75-like	XLOC_001158|PGSC0003DMT400052057
BAE46417: double WRKY type transfactor	MICRO.2559.C1_1750	WRKY transcription factor 3	XLOC_025181|PGSC0003DMT400024630,PGSC0003DMT400024631,PGSC0003DMT400024632,PGSC0003DMT400024633
AAX20040: WRKY family transcription factor	MICRO.8010.C1_865	WRKY transcription factor 2	XLOC_021881|PGSC0003DMT400020517,PGSC0003DMT400020518
BAC23031: WRKY-type DNA binding protein	MICRO.11294.C1_498	double WRKY type transfactor	XLOC_036845|PGSC0003DMT400043203,PGSC0003DMT400043204,PGSC0003DMT400043205,PGSC0003DMT400043206
AAW67002: WRKY transcription factor-c	MICRO.9895.C1_1130	WRKY-type DNA binding protein	XLOC_018838|PGSC0003DMT400056352
BAA77358: DNA-binding protein NtWRKY3	MICRO.10091.C2_864	WRKY transcription factor 1	XLOC_023844|PGSC0003DMT400073394,PGSC0003DMT400073395,PGSC0003DMT400073396
BAA77358: DNA-binding protein NtWRKY3	MICRO.10091.C3_1079	probable WRKY transcription factor 75-like	XLOC_001158|PGSC0003DMT400052057
AAC49528: WRKY3	STMCN42TV_247	LRR-repeat protein At3g48880-like isoform 1	XLOC_019823|-
AAQ72790: WRKY-type transcription factor	MICRO.11040.C1_522	LRR-repeat protein At3g03360-like	XLOC_033522|PGSC0003DMT400055177,PGSC0003DMT400055179
Q40392: TMV resistance protein N	MICRO.1872.C2_1065	NBS-LRR resistance protein-like protein	XLOC_021120|-
BAB11635: TMV resistance protein N	bf_ivrootxx_0033h08.t3m.scf_22	threonine-protein kinase FLS2-like	XLOC_040541|-
BAD94220: putative receptor-like protein kinase	MICRO.4729.C1_606	threonine-protein kinase At3g47570-like	XLOC_039225|PGSC0003DMT400041273,PGSC0003DMT400041276
Q40392: TMV resistance protein N	MICRO.1872.C2_1065	calcium-binding protein CML38-like	XLOC_003568|PGSC0003DMT400090967
BAB11635: TMV resistance protein N	bf_ivrootxx_0033h08.t3m.scf_22	probable calcium-binding protein CML26-like	XLOC_007550|PGSC0003DMT400059525
BAD94220: putative receptor-like protein kinase	MICRO.4729.C1_606	calcium-binding protein CML38-like	XLOC_003569|PGSC0003DMT400096032
AAM10948: putative bHLH transcription factor	MICRO.8552.C1_1652	probable calcium-binding protein CML48-like	XLOC_031991|PGSC0003DMT400067728,PGSC0003DMT400067729,PGSC0003DMT400067730,PGSC0003DMT400067731
AAU04435: MAPKK	MICRO.17148.C1_157	transcription factor bHLH149-like	XLOC_009472|PGSC0003DMT400007231
AAU04436: MAPKK	MICRO.12818.C1_1190	transcription factor bHLH93-like	XLOC_035405|PGSC0003DMT400016358,PGSC0003DMT400016359,PGSC0003DMT400016360
NP_565618: calmodulin binding	MICRO.7928.C1_361	transcription factor bHLH130-like	XLOC_037110|PGSC0003DMT400065029
NP_188270: calmodulin binding	MICRO.14183.C1_1615	TGACG-sequence-specific DNA-binding protein TGA-2.1-like	XLOC_010727|PGSC0003DMT400059950
NP_974672: calmodulin binding	MICRO.17044.C1_813	transcription factor TGA6-like	XLOC_001609|PGSC0003DMT400028833
NP_566917: calmodulin binding	MICRO.14514.C1_1213	bZIP DNA-binding protein	XLOC_014811|PGSC0003DMT400088166
AAM95458: calmodulin-like protein	MICRO.16718.C1_646	zinc finger Ran-binding domain-containing protein 2-like	XLOC_035216|PGSC0003DMT400053235,PGSC0003DMT400053236,PGSC0003DMT400053237,PGSC0003DMT400053238,PGSC0003DMT400053239
NP_190855: calmodulin binding	MICRO.8211.C1_1677	zinc finger protein CONSTANS-LIKE 9-like	XLOC_018429|PGSC0003DMT400074142,PGSC0003DMT400074143,PGSC0003DMT400074144,PGSC0003DMT400074145
Q42429: Agamous-like MADS-box protein AGL8 homolog (POTM1-1)	MICRO.6764.C1_277	NAC domain protein NAC2	XLOC_022438|PGSC0003DMT400047438,PGSC0003DMT400047440
AAF22139: MADS box protein	bf_mxflxxxx_0057d07.t3m.scf_542	zinc finger A20 and AN1 domain-containing stress-associated protein 7-like	XLOC_033689|PGSC0003DMT400010084
AAG09919: MADS box protein 2	MICRO.1027.C2_292	ATP-dependent zinc metalloprotease FTSH 2, chloroplastic-like	XLOC_014437|PGSC0003DMT400044600,PGSC0003DMT400044601
Q42429: Agamous-like MADS-box protein AGL8 homolog (POTM1-1)	STMHO53TV_599	Agamous-like MADS-box protein AGL8 homolog; AltName: Full=POTM1-1	XLOC_021711|PGSC0003DMT400010450,PGSC0003DMT400010451
ABG66307: CCR4 associated factor 1-related protein	SSBT006M19x.scf_336	agamous-like MADS-box protein AGL15-like	XLOC_010282|PGSC0003DMT400017414,PGSC0003DMT400017416,PGSC0003DMT400017417
ABG66307: CCR4 associated factor 1-related protein	MICRO.2383.C1_967	probable CCR4-associated factor 1 homolog 9-like	XLOC_030396|PGSC0003DMT400015091
ABJ91234: CBL-interacting protein kinase 6	MICRO.98.C8_1133	CBL-interacting protein kinase 22	XLOC_024345|PGSC0003DMT400036354
ABD72959: GRAS2	MICRO.2020.C2_542	threonine-protein kinase 25-like	XLOC_023902|PGSC0003DMT400073317
ABD72958: GRAS1	MICRO.2974.C1_1107	threonine-protein kinase 14-like	XLOC_029748|PGSC0003DMT400056629
ABD72958: GRAS1	MICRO.6852.C1_1944	ethylene-responsive transcriptional coactivator	XLOC_018144|PGSC0003DMT400076572,PGSC0003DMT400076573
BAE93149: methyl jasmonate induced MYB-related transcription factor	SSBN001F12u.scf_487	transcription factor UNE12-like	XLOC_015337|PGSC0003DMT400049768
ABH02855: MYB transcription factor MYB127	MICRO.11252.C1_708	SNF1-related protein kinase regulatory subunit gamma-1-like	XLOC_016981|PGSC0003DMT400039410,PGSC0003DMT400039411
ABH02859: MYB transcription factor MYB138	MICRO.4861.C1_1117	kelch-repeat protein At3g06240-like	XLOC_015370|PGSC0003DMT400049734
NP_194461: transcription factor/ zinc ion binding	MICRO.5319.C3_413	F-box protein PP2-B15-like	XLOC_009543|PGSC0003DMT400063741,PGSC0003DMT400063742,PGSC0003DMT400063743,PGSC0003DMT400063744
NP_566877: nucleic acid binding / transcription factor/ zinc ion binding	MICRO.896.C1_369	F-box protein At4g18380	XLOC_032635|PGSC0003DMT400097155
NP_177700: nucleic acid binding / transcription factor/ zinc ion binding	MICRO.3649.C1_856	F-box protein At2g17036-like isoform 1	XLOC_004134|PGSC0003DMT400003917,PGSC0003DMT400003918,PGSC0003DMT400003919
NP_565684: nucleic acid binding / transcription factor/ zinc ion binding	MICRO.5773.C1_1
ABO84635: Zinc finger, GATA-type; ZIM; CCT	MICRO.16375.C1_587
ABE77424: Zinc finger, TAZ-type; BTB/POZ	MICRO.9881.C1_722
Transporters		Transporters
ABN47005: early nodulin 93 protein	MICRO.8443.C1_423	early nodulin-93-like	XLOC_037577|PGSC0003DMT400019742
AAC72337: nodulin	bf_suspxxxx_0006H12.t3m.scf_692	early nodulin-93-like	XLOC_035240|PGSC0003DMT400053289,PGSC0003DMT400053290,PGSC0003DMT400053291
ABO82869: NUDIX hydrolase	STMCI43TV_555	early nodulin-93-like	XLOC_035214|PGSC0003DMT400048814,PGSC0003DMT400048815,PGSC0003DMT400048816
BAA21657: sulfate transporter	SSBN001G08u.scf_1	bidirectional sugar transporter SWEET12-like	XLOC_040390|PGSC0003DMT400082699
ABD32531: Amino acid/polyamine transporter II	MICRO.1788.C1_1244	carnitine transporter 3-like	XLOC_035282|-
CAC00697: putative sugar transporter	MICRO.10496.C1_726	probable boron transporter 2-like	XLOC_024682|PGSC0003DMT400065876
ABO83141: C2; Sugar transporter superfamily	MICRO.8694.C1_1306	carnitine transporter 3-like	XLOC_035282|-
BAB19757: nitrate transporter NRT1-2	MICRO.16880.C1_618	carnitine transporter 3-like	XLOC_034276|PGSC0003DMT400027391,PGSC0003DMT400027392
Q9SV13: Sulfate transporter 3.1 (AST12) (AtST1)	MICRO.18285.C1_204	carnitine transporter 3-like	XLOC_035263|PGSC0003DMT400040769,PGSC0003DMT400040770
NP_176372: oligosaccharide transporter	MICRO.15374.C1_1186	amino acid transporter	XLOC_036233|PGSC0003DMT400030727,PGSC0003DMT400030728,PGSC0003DMT400030729,PGSC0003DMT400030732
AAO60108: nodulin-like protein	MICRO.8588.C2_621	probable sulfate transporter 3.3-like	XLOC_022423|PGSC0003DMT400047400,PGSC0003DMT400047402,PGSC0003DMT400047403
AAN86062: sugar transporter	MICRO.10741.C1_1388	Multidrug resistance protein ABC transporter family	XLOC_028589|PGSC0003DMT400089149
CAA93316: nitrite transporter	MICRO.8713.C2_1944	metal-nicotianamine transporter YSL2-like	XLOC_038874|PGSC0003DMT400013956,PGSC0003DMT400013957
AAX28838: zinc transporter protein ZIP2	MICRO.15525.C1_953	ADP-transporter	XLOC_011701|PGSC0003DMT400073724
AAO19451: glucose-6-phosphate/phosphate translocator 2	MICRO.1076.C1_1353	carnitine transporter 3-like	XLOC_034276|PGSC0003DMT400027391,PGSC0003DMT400027392
AAO19451: glucose-6-phosphate/phosphate translocator 2	174G02AF.esd_341
